# Supplementary material for: Palladium-catalyzed alkyne hydrocarbonylation under atmospheric pressure of carbon monoxide in the presence of hydrosilane
Source: Royal Society of Chemistry journal article supplement (doi:10.1039/d2gc04689j), 2023-01-01

Electronic Supplementary Information for:

## Palladium-catalyzed alkyne hydrocarbonylation at atmospheric pressure of carbon monoxide in the presence of hydrosilane †

Yu Luo,<sup>a,b</sup> Xilong Wang,<sup>a,b</sup> Qianwen Liu,<sup>c</sup> Yimiao He,<sup>c</sup> Jing Li,<sup>a,b</sup> Shuang Luo,<sup>\*,a,b</sup> Qiang Zhu<sup>\*,a,b,c</sup>

<sup>a</sup> State Key Laboratory of Respiratory Disease, Guangzhou Institutes of Biomedicine and Health, Chinese Academy of Sciences, 190 Kaiyuan Avenue, Guangzhou 510530, China

<sup>b</sup> University of Chinese Academy of Sciences, No. 19(A) Yuquan Road, Shijingshan District, Beijing, 100049, China

<sup>c</sup> Guangxi Key Laboratory of Natural Polymer Chemistry and Physics, College of Chemistry and Materials, Nanning Normal University, Nanning 530001, China

\*E-mail: luo\_shuang@gibh.ac.cn; zhu\_qiang@gibh.ac.cn.

### Table of Contents

|                                                                                                                                            |    |
|--------------------------------------------------------------------------------------------------------------------------------------------|----|
| 1. General Considerations .....                                                                                                            | 2  |
| 2. Experimental Procedures and Characterization .....                                                                                      | 3  |
| 2.1 Preparation of Substrates <b>6</b> and Characterization.....                                                                           | 3  |
| 2.2 General Procedure for the Synthesis of Linear Products <b>3</b> and Characterization.....                                              | 14 |
| 2.3 General Procedure for the Synthesis of Branch Products <b>4</b> and Characterization .....                                             | 24 |
| 2.4 General Procedure for the Synthesis of Products <b>5</b> and Characterization .....                                                    | 25 |
| 2.5 Screening of Conditions for the Asymmetric Hydroamidation of 2-( <i>tert</i> -butyl)- <i>N</i> -(2-(phenylethynyl)phenyl)aniline ..... | 27 |
| 2.6 General Procedure for the Asymmetric Synthesis of Products <b>7</b> and Characterization .....                                         | 29 |
| 2.7 Procedure for Control experiments .....                                                                                                | 62 |
| 2.8 Procedures for the derivatization of <b>7-1</b> and Characterization .....                                                             | 64 |
| 2.9 Procedures for the Deuterium experiments.....                                                                                          | 69 |
| 2.10 Racemization Studies of <b>7-1</b> .....                                                                                              | 71 |
| 3. X-ray Crystal Structure of ( <i>E</i> )- <b>7-12</b> and ( <i>E</i> )- <b>7-23</b> .....                                                | 73 |
| 4. References .....                                                                                                                        | 75 |
| 5. NMR Spectra.....                                                                                                                        | 76 |

## 1. General Considerations

Unless otherwise noted, all chemicals were purchased from commercial suppliers and used without further purification.  $^1\text{H}$ ,  $^{13}\text{C}$  and  $^{19}\text{F}$  NMR spectra were recorded at ambient temperature in  $\text{CDCl}_3$  on 500 MHz Bruker FT-NMR spectrometers. Chemical shifts were given as  $\delta$  value (ppm), and the data are reported as follows:  $^1\text{H}$  NMR shifts were referenced to  $\text{CDCl}_3$  at 7.26 ppm,  $^{13}\text{C}$  NMR shifts were referenced to  $\text{CDCl}_3$  at 77.16 ppm. The following abbreviations (or combinations thereof) were used to explain multiplicities: s = singlet, d = doublet, t = triplet, m = multiplet, br = broad. The coupling constants  $J$  were given in Hertz. Column chromatography was performed using EM silica gel 60 (100–200 mesh). Mass spectroscopy data of the products were collected on ABSciex5600plusQTOF HR mass spectrometer equipped with an ESI source. High pressure liquid chromatography (HPLC condition) analyses were performed on a Shimadzu instrument using a chiral stationary phase column (Daicel Co. CHIRALPAK or FLM Co. MX(2)). The chiral HPLC condition methods were calibrated with the corresponding racemic mixtures.

***Caution: CO gas is highly toxic and all operations are performed in a well-ventilated fume hood.***

## 2. Experimental Procedures and Characterization

### 2.1 Preparation of Substrates 6 and Characterization

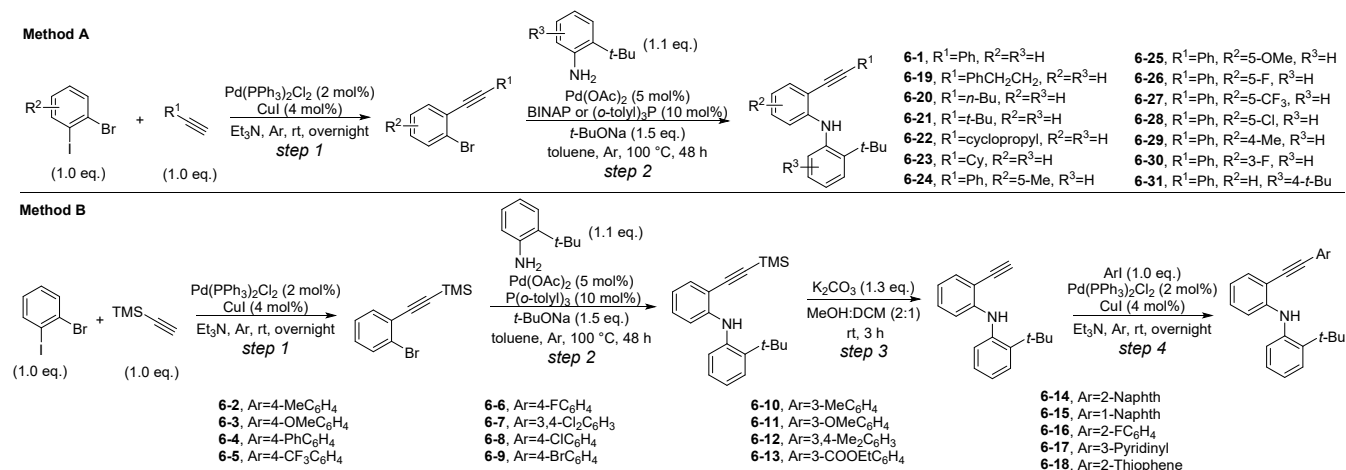

#### Method A:<sup>1</sup>

**step 1:** To a solution of Pd(PPh<sub>3</sub>)<sub>2</sub>Cl<sub>2</sub> (42 mg, 0.06 mmol, 2 mol%) and CuI (23 mg, 0.12 mmol, 4 mol%) in Et<sub>3</sub>N (6 mL) were added 2-bromo-iodobenzene (3 mmol) and phenylacetylene (3 mmol). After being stirred at rt overnight under Ar, the mixture was quenched with NH<sub>4</sub>Cl aq and extracted with DCM (20 mL × 3). Then, the combined organic layers were washed with brine, dried over anhydrous Na<sub>2</sub>SO<sub>4</sub> and concentrated under reduced pressure. The residue was purified by flash chromatography on silica gel (hexane) to give 1-bromo-2-phenylethynylbenzene.

**step 2:** To a solution of Pd(OAc)<sub>2</sub> (28 mg, 0.125 mmol, 5 mol%), BINAP (155 mg, 0.25 mmol, 10 mol%) or P(*o*-tolyl)<sub>3</sub> (76 mg, 0.25 mmol, 10 mol%), *t*-BuONa (360 mg, 3.75 mmol, 1.5 eq.) in dry toluene (8 mL) were added 1-bromo-2-phenylethynylbenzene (2.5 mmol) and 2-*tert*-butylaniline (428 μL, 2.75 mmol, 1.1 eq.). After being stirred at 100 °C for 48 h under Ar, the mixture was quenched with NaHCO<sub>3</sub> aq and extracted with EtOAc (20 mL × 3). Then, the combined organic layers were washed with brine, dried over anhydrous Na<sub>2</sub>SO<sub>4</sub> and concentrated under reduced pressure. The residue was purified by flash chromatography on silica gel (hexane/EtOAc) to give **6**.

#### Method B:<sup>1</sup>

**step 1:** Same as method A, step 1.

**step 2:** Same as method A, step 2.

**step 3:** To a solution of 2-*tert*-butyl-*N*-(2-(trimethylsilylethynyl)phenyl)aniline (2.9 g, 9 mmol) in DCM (3 mL) and CH<sub>3</sub>OH (6 mL) was added K<sub>2</sub>CO<sub>3</sub> (1.6 g, 11.7 mmol, 1.3 eq.). After being stirred at rt for 3 h, the mixture was quenched with water and extracted with DCM (50 mL × 3). Then, the combined organic layers were washed with brine, dried over anhydrous Na<sub>2</sub>SO<sub>4</sub> and concentrated under reduced pressure. The residue was purified by flash chromatography on silica gel (hexane) to give 2-*tert*-butyl-*N*-(2-(ethynyl)phenyl)aniline (1.9 g, 85 % yield).

**step 4:** Same as method A, step 1.

### Characterization of Substrates 6

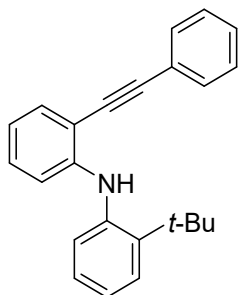

#### 2-(*tert*-butyl)-*N*-(2-(phenylethynyl)phenyl)aniline (**6-1**)

Pale yellow solid.  $^1\text{H NMR}$  (600 MHz,  $\text{CDCl}_3$ )  $\delta$  7.56 – 7.51 (m, 2H), 7.51 – 7.46 (m, 2H), 7.41 (d,  $J$  = 7.8 Hz, 1H), 7.38 – 7.30 (m, 3H), 7.27 – 7.20 (m, 1H), 7.19 – 7.12 (m, 2H), 6.87 (d,  $J$  = 8.1 Hz, 1H), 6.80 – 6.71 (m, 1H), 6.55 (s, 1H), 1.48 (s, 9H).  $^{13}\text{C NMR}$  (151 MHz,  $\text{CDCl}_3$ )  $\delta$  147.0, 144.4, 139.7, 132.3, 131.3, 129.6, 128.4, 128.3, 127.2, 126.9, 126.8, 124.8, 123.1, 117.7, 111.9, 108.5, 95.2, 86.2, 34.9, 30.6.

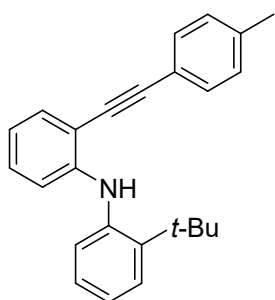

#### 2-(*tert*-butyl)-*N*-(2-(*p*-tolylethynyl)phenyl)aniline (**6-2**)

Pale yellow solid.  $^1\text{H NMR}$  (500 MHz,  $\text{CDCl}_3$ )  $\delta$  = 7.46 (ddd,  $J$  = 7.7, 3.3, 1.6 Hz, 2H), 7.42 – 7.36 (m, 3H), 7.22 (td,  $J$  = 7.5, 1.5 Hz, 1H), 7.18 – 7.09 (m, 4H), 6.83 (d,  $J$  = 8.3 Hz, 1H), 6.73 (td,  $J$  = 7.5, 1.1 Hz, 1H), 6.52 (s, 1H), 2.37 (s, 3H), 1.45 (s, 9H).  $^{13}\text{C NMR}$  (126 MHz,  $\text{CDCl}_3$ )  $\delta$  = 146.9, 144.4, 139.8, 138.4, 132.2, 131.3, 129.4, 129.2, 127.2, 126.9, 126.8, 124.7, 120.1, 117.7, 111.9, 108.9, 95.4, 85.5, 34.9, 30.6, 21.5.

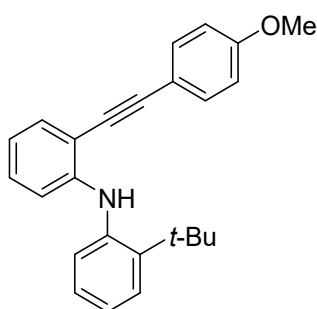

#### 2-(*tert*-butyl)-*N*-(2-((4-methoxyphenyl)ethynyl)phenyl)aniline (**6-3**)

Brown oil.  $^1\text{H NMR}$  (500 MHz,  $\text{CDCl}_3$ )  $\delta$  = 7.47 (ddd,  $J$  = 8.8, 6.2, 2.0 Hz, 4H), 7.40 (dd,  $J$  = 7.9, 1.5 Hz, 1H), 7.26 – 7.20 (m, 1H), 7.14 (qd,  $J$  = 7.3, 3.2 Hz, 2H), 6.92 – 6.84 (m, 3H), 6.78 – 6.71 (m, 1H), 6.53 (s, 1H), 3.84 (s, 3H), 1.47 (s, 9H).  $^{13}\text{C NMR}$  (126 MHz,  $\text{CDCl}_3$ )  $\delta$  = 159.6, 146.8, 144.3, 139.8, 132.8, 132.1, 129.3, 127.2, 126.8, 124.6, 117.7, 115.2, 114.1, 111.9, 109.0, 95.2, 84.8, 55.3, 34.9, 30.6.

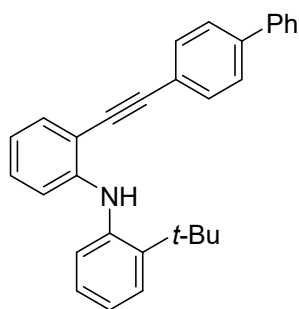

2-([1,1'-biphenyl]-4-ylethynyl)-*N*-(2-(*tert*-butyl)phenyl)aniline (**6-4**)

Yellow solid.  $^1\text{H NMR}$  (500 MHz,  $\text{CDCl}_3$ )  $\delta$  = 7.68 – 7.59 (m, 6H), 7.53 (td,  $J$  = 7.5, 1.5 Hz, 2H), 7.49 (t,  $J$  = 7.6, 2H), 7.45 – 7.37 (m, 2H), 7.28 (dd,  $J$  = 8.6, 7.1 Hz, 1H), 7.22 – 7.14 (m, 2H), 6.90 (d,  $J$  = 8.4 Hz, 1H), 6.79 (t,  $J$  = 7.4 Hz, 1H), 6.59 (s, 1H), 1.52 (s, 9H).  $^{13}\text{C NMR}$  (126 MHz,  $\text{CDCl}_3$ )  $\delta$  147.0, 144.4, 141.0, 140.2, 139.7, 132.3, 131.7, 129.7, 128.8, 127.6, 127.2, 127.1, 127.0, 127.0, 126.9, 124.8, 122.0, 117.8, 112.0, 108.6, 95.1, 86.9, 34.9, 30.6.

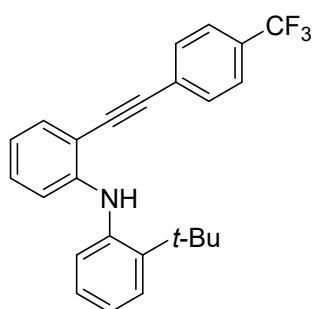

2-(*tert*-butyl)-*N*-(2-((4-(trifluoromethyl)phenyl)ethynyl)phenyl)aniline (**6-5**)

Pale yellow solid.  $^1\text{H NMR}$  (500 MHz,  $\text{CDCl}_3$ )  $\delta$  = 7.61 (s, 4H), 7.49 (dd,  $J$  = 7.7, 1.5 Hz, 2H), 7.38 (d,  $J$  = 7.8 Hz, 1H), 7.24 (dd,  $J$  = 7.7, 1.5 Hz, 1H), 7.21 – 7.12 (m, 2H), 6.85 (d,  $J$  = 8.4 Hz, 1H), 6.76 (t,  $J$  = 7.5 Hz, 1H), 6.47 (s, 1H), 1.46 (s, 9H).  $^{13}\text{C NMR}$  (126 MHz,  $\text{CDCl}_3$ )  $\delta$  147.3, 144.5, 139.5, 132.5, 131.5, 130.3, 129.9 (q,  $J$  = 32.7 Hz), 127.3, 127.0, 127.0 (q,  $J$  = 12.6 Hz), 126.9, 125.4 (q,  $J$  = 3.8 Hz), 124.5, 120.8 (q,  $J$  = 289.8 Hz), 117.9, 112.2, 107.7, 93.8, 88.8, 34.9, 30.6.  $^{19}\text{F NMR}$  (471 MHz,  $\text{CDCl}_3$ )  $\delta$  = -62.8.

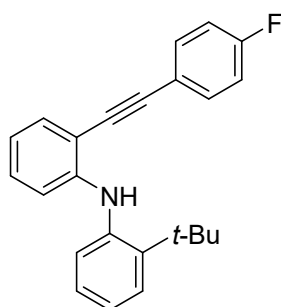

2-(*tert*-butyl)-*N*-(2-((4-fluorophenyl)ethynyl)phenyl)aniline (**6-6**)

Pale yellow oil.  $^1\text{H NMR}$  (500 MHz,  $\text{CDCl}_3$ )  $\delta$  = 7.55 – 7.46 (m, 4H), 7.41 (dd,  $J$  = 7.9, 1.5 Hz, 1H), 7.26 (td,  $J$  = 7.6, 1.6 Hz, 1H), 7.20 – 7.13 (m, 2H), 7.07 (t,  $J$  = 8.7 Hz, 2H), 6.88 (d,  $J$  = 8.4 Hz, 1H), 6.77 (t,  $J$  = 7.4 Hz, 1H), 6.51 (s, 1H), 1.48 (s, 9H).  $^{13}\text{C NMR}$  (126 MHz,  $\text{CDCl}_3$ )  $\delta$  = 162.5 (d,  $J$  = 249.7 Hz), 147.0, 144.3, 139.6, 133.2 (d,  $J$  = 8.2 Hz), 132.2, 129.7, 127.2, 126.9, 124.8, 119.2 (d,  $J$  = 3.6 Hz), 117.8, 115.8, 115.6, 112.0, 108.4, 94.1, 85.9, 34.9, 30.6.  $^{19}\text{F NMR}$  (471 MHz,  $\text{CDCl}_3$ )  $\delta$  = -110.7.

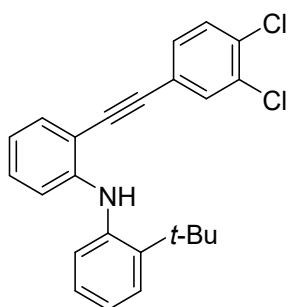

2-(*tert*-butyl)-*N*-(2-((3,4-dichlorophenyl)ethynyl)phenyl)aniline (**6-7**)

Dark yellow oil.  $^1\text{H NMR}$  (500 MHz,  $\text{CDCl}_3$ )  $\delta$  = 7.60 (t,  $J$  = 1.5 Hz, 1H), 7.48 (dd,  $J$  = 13.8, 7.8 Hz, 2H), 7.42 (d,  $J$  = 8.3 Hz, 1H), 7.38 (d,  $J$  = 7.9 Hz, 1H), 7.32 (dt,  $J$  = 8.3, 1.4 Hz, 1H), 7.28 – 7.22 (m, 1H), 7.17 (td,  $J$  = 7.8, 3.8 Hz, 2H), 6.86 (d,  $J$  = 8.4 Hz, 1H), 6.76 (t,  $J$  = 7.5 Hz, 1H), 6.44 (s, 1H), 1.48 (s, 9H).  $^{13}\text{C NMR}$  (126 MHz,  $\text{CDCl}_3$ )  $\delta$  = 147.2, 144.4, 139.5, 132.9, 132.7, 132.6, 132.4, 130.5, 130.3, 130.2, 127.3, 126.9, 126.9, 125.0, 123.1, 117.9, 112.2, 107.7, 92.8, 88.4, 34.9, 30.6.

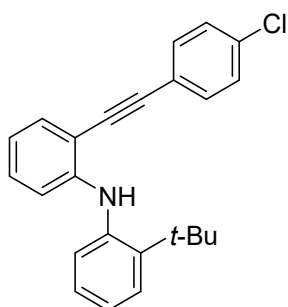

2-(*tert*-butyl)-*N*-(2-(4-chlorophenyl)ethynyl)phenyl)aniline (**6-8**)

Pale yellow solid.  $^1\text{H NMR}$  (500 MHz,  $\text{CDCl}_3$ )  $\delta$  = 7.50 (ddd,  $J$  = 7.7, 6.4, 1.6 Hz, 2H), 7.48 – 7.44 (m, 2H), 7.40 (dd,  $J$  = 7.9, 1.5 Hz, 1H), 7.37 – 7.32 (m, 2H), 7.26 (td,  $J$  = 7.6, 1.5 Hz, 1H), 7.20 – 7.14 (m, 2H), 6.88 (d,  $J$  = 8.3 Hz, 1H), 6.77 (td,  $J$  = 7.5, 1.1 Hz, 1H), 6.50 (s, 1H), 1.48 (s, 9H).  $^{13}\text{C NMR}$  (126 MHz,  $\text{CDCl}_3$ )  $\delta$  = 147.0, 144.3, 139.6, 134.3, 132.5, 132.3, 129.9, 128.8, 127.2, 126.9, 126.9, 124.8, 121.6, 117.8, 112.1, 108.2, 94.0, 87.3, 34.9, 30.6.

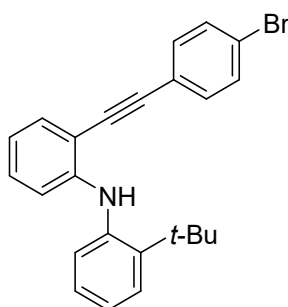

2-(4-bromophenyl)ethynyl)-*N*-(2-(*tert*-butyl)phenyl)aniline (**6-9**)

White solid.  $^1\text{H NMR}$  (600 MHz,  $\text{CDCl}_3$ )  $\delta$  7.51 – 7.44 (m, 4H), 7.37 (t,  $J$  = 7.5 Hz, 3H), 7.24 (t,  $J$  = 7.5 Hz, 1H), 7.15 (t,  $J$  = 7.6 Hz, 2H), 6.85 (d,  $J$  = 8.3 Hz, 1H), 6.75 (t,  $J$  = 7.5 Hz, 1H), 6.47 (s, 1H), 1.45 (s, 9H).  $^{13}\text{C NMR}$  (151 MHz,  $\text{CDCl}_3$ )  $\delta$  147.0, 144.3, 139.5, 132.7, 132.3, 131.7, 129.9, 127.2, 126.9, 124.9, 122.5, 122.0, 117.8, 112.0, 108.1, 94.1, 87.4, 34.9, 30.6.

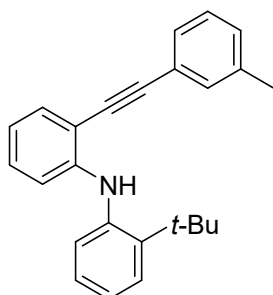

2-(*tert*-butyl)-*N*-(2-(*m*-tolylethynyl)phenyl)aniline (**6-10**)

Pale yellow solid.  $^1\text{H NMR}$  (500 MHz,  $\text{CDCl}_3$ )  $\delta$  = 7.47 (ddd,  $J$  = 7.6, 4.4, 1.5 Hz, 2H), 7.38 (d,  $J$  = 7.8 Hz, 1H), 7.34 (s, 1H), 7.32 (d,  $J$  = 7.7 Hz, 1H), 7.23 (td,  $J$  = 7.7, 2.0 Hz, 2H), 7.14 (dd,  $J$  = 11.6, 7.3 Hz, 3H), 6.83 (d,  $J$  = 8.3 Hz, 1H), 6.74 (t,  $J$  = 7.5 Hz, 1H), 6.52 (s, 1H), 2.35 (s, 3H), 1.46 (s, 9H).  $^{13}\text{C NMR}$  (126 MHz,  $\text{CDCl}_3$ )  $\delta$  = 147.0, 144.5, 139.8, 138.1, 132.2, 132.0, 129.6, 129.2, 128.4, 128.3, 127.2, 127.0, 126.8, 124.8, 122.9, 117.7, 112.0, 108.7, 95.4, 85.8, 34.9, 30.6, 21.2.

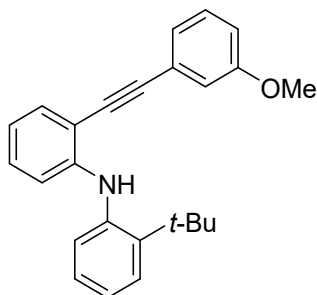

2-(*tert*-butyl)-*N*-(2-((3-methoxyphenyl)ethynyl)phenyl)aniline (**6-11**)

Dark yellow solid.  $^1\text{H NMR}$  (500 MHz,  $\text{CDCl}_3$ )  $\delta$  = 7.47 (dd,  $J$  = 7.8, 1.6 Hz, 2H), 7.38 (dd,  $J$  = 7.8, 1.5 Hz, 1H), 7.28 – 7.20 (m, 2H), 7.17 – 7.09 (m, 3H), 7.04 (dd,  $J$  = 2.7, 1.4 Hz, 1H), 6.90 (ddd,  $J$  = 8.4, 2.6, 1.0 Hz, 1H), 6.84 (d,  $J$  = 8.3 Hz, 1H), 6.74 (td,  $J$  = 7.5, 1.2 Hz, 1H), 6.51 (s, 1H), 3.81 (s, 3H), 1.46 (s, 9H).  $^{13}\text{C NMR}$  (126 MHz,  $\text{CDCl}_3$ )  $\delta$  = 159.4, 147.0, 144.4, 139.7, 132.3, 129.7, 129.5, 127.2, 127.0, 126.9, 124.8, 124.1, 123.9, 117.8, 116.1, 115.0, 112.0, 108.6, 95.2, 86.0, 55.3, 34.9, 30.6.

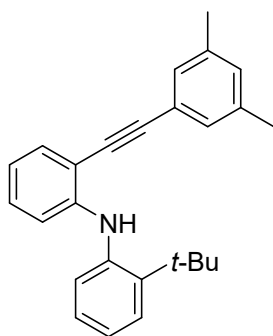

2-(*tert*-butyl)-*N*-(2-((3,5-dimethylphenyl)ethynyl)phenyl)aniline (**6-12**)

Yellow solid.  $^1\text{H NMR}$  (500 MHz,  $\text{CDCl}_3$ )  $\delta$  7.49 (t,  $J$  = 8.1 Hz, 2H), 7.41 (d,  $J$  = 7.8 Hz, 1H), 7.25 (t,  $J$  = 7.4 Hz, 1H), 7.17 (s, 2H), 7.17 – 7.12 (m, 2H), 6.99 (s, 1H), 6.85 (d,  $J$  = 8.3 Hz, 1H), 6.76 (t,  $J$  = 7.5 Hz, 1H), 6.54 (s, 1H), 2.33 (s, 6H), 1.49 (s, 9H).  $^{13}\text{C NMR}$  (126 MHz,  $\text{CDCl}_3$ )  $\delta$  = 147.0, 144.5, 139.8, 137.9, 132.2, 130.2, 129.5, 129.1, 127.2, 127.0, 126.8, 124.8, 122.8, 117.7, 112.0, 108.9, 95.6, 85.5, 34.9, 30.6, 21.1.

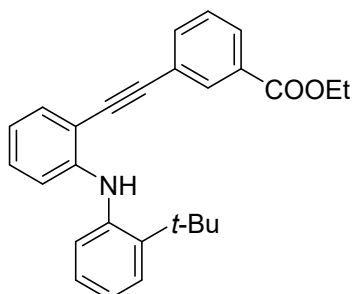

ethyl 3-((2-((2-(*tert*-butyl)phenyl)amino)phenyl)ethynyl)benzoate (**6-13**)

Brown oil.  $^1\text{H NMR}$  (500 MHz,  $\text{CDCl}_3$ )  $\delta$  = 8.18 (t,  $J$  = 1.7 Hz, 1H), 8.01 (dt,  $J$  = 7.7, 1.5 Hz, 1H), 7.67 (dt,  $J$  = 7.7, 1.5 Hz, 1H), 7.48 (dt,  $J$  = 8.1, 2.4 Hz, 2H), 7.43 (t,  $J$  = 7.8 Hz, 1H), 7.38 (dd,  $J$  = 7.8, 1.5 Hz, 1H), 7.23 (td,  $J$  = 7.5, 1.6 Hz, 1H), 7.15 (tdd,  $J$  = 7.3, 4.9, 1.4 Hz, 2H), 6.85 (d,  $J$  = 8.4 Hz, 1H), 6.75 (t,  $J$  = 7.5 Hz, 1H), 6.51 (s, 1H), 4.39 (q,  $J$  = 7.1 Hz, 2H), 1.47 (s, 9H), 1.41 (t,  $J$  = 7.1 Hz, 3H).  $^{13}\text{C NMR}$  (126 MHz,  $\text{CDCl}_3$ )  $\delta$  = 165.8, 147.1, 144.4, 139.6, 135.2, 132.4, 132.4, 130.9, 130.0, 129.2, 128.5, 127.2, 126.9, 126.9, 124.8, 123.5, 117.8, 112.1, 108.2, 94.2, 87.2, 61.2, 34.9, 30.6, 14.3.

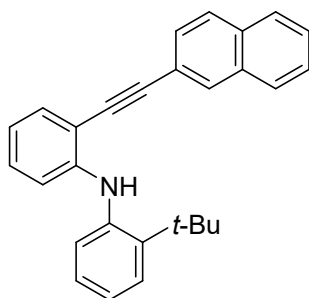

2-(*tert*-butyl)-*N*-(2-(naphthalen-2-ylethynyl)phenyl)aniline (**6-14**)

Brown oil.  $^1\text{H NMR}$  (500 MHz,  $\text{CDCl}_3$ )  $\delta$  8.04 (s, 1H), 7.84 – 7.80 (m, 3H), 7.57 (d,  $J = 8.5$  Hz, 1H), 7.55 – 7.48 (m, 4H), 7.42 (d,  $J = 7.8$  Hz, 1H), 7.26 (t,  $J = 7.5$  Hz, 1H), 7.17 (t,  $J = 6.2$  Hz, 2H), 6.88 (d,  $J = 8.4$  Hz, 1H), 6.78 (t,  $J = 7.4$  Hz, 1H), 6.60 (s, 1H), 1.50 (s, 9H).  $^{13}\text{C NMR}$  (126 MHz,  $\text{CDCl}_3$ )  $\delta = 147.1, 144.4, 139.7, 133.0, 132.8, 132.3, 131.2, 129.7, 128.2, 128.1, 127.8, 127.8, 127.2, 127.0, 126.9, 126.7, 126.6, 124.8, 120.4, 117.8, 112.1, 108.7, 95.6, 86.6, 34.9, 30.6$ .

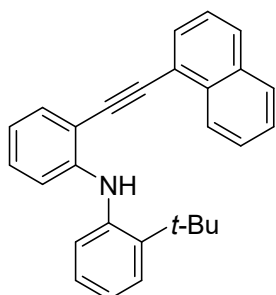

2-(*tert*-butyl)-*N*-(2-(naphthalen-1-ylethynyl)phenyl)aniline (**6-15**)

Yellow solid.  $^1\text{H NMR}$  (500 MHz,  $\text{CDCl}_3$ )  $\delta$  8.47 (d,  $J = 7.9$  Hz, 1H), 7.89 – 7.85 (m, 2H), 7.75 (d,  $J = 6.9$  Hz, 1H), 7.65 – 7.52 (m, 3H), 7.51 – 7.39 (m, 3H), 7.26 (t,  $J = 6.8$  Hz, 1H), 7.21 – 7.16 (m, 2H), 6.87 (d,  $J = 8.2$  Hz, 1H), 6.81 (t,  $J = 7.2$  Hz, 1H), 6.61 (s, 1H), 1.47 (s, 9H).  $^{13}\text{C NMR}$  (126 MHz,  $\text{CDCl}_3$ )  $\delta = 147.2, 144.7, 139.8, 133.2, 133.0, 132.5, 130.2, 129.8, 128.8, 128.3, 127.4, 127.2, 126.9, 126.8, 126.5, 126.2, 125.3, 125.0, 120.8, 117.8, 112.2, 108.8, 93.2, 91.0, 34.9, 30.7$ .

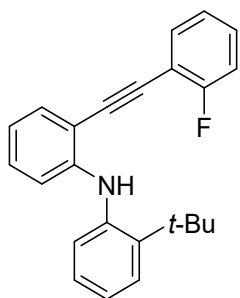

2-(*tert*-butyl)-*N*-(2-((2-fluorophenyl)ethynyl)phenyl)aniline (**6-16**)

White solid.  $^1\text{H NMR}$  (600 MHz,  $\text{CDCl}_3$ )  $\delta$  7.54 – 7.46 (m, 3H), 7.36 (d,  $J = 7.8$  Hz, 1H), 7.34 – 7.28 (m, 1H), 7.25 – 7.21 (m, 1H), 7.19 – 7.07 (m, 4H), 6.78 – 6.71 (m, 2H), 6.50 (s, 1H), 1.45 (s, 9H).  $^{13}\text{C NMR}$  (151 MHz,  $\text{CDCl}_3$ )  $\delta$  162.3 (d,  $J = 251.6$  Hz), 147.5, 145.3, 139.7, 132.9, 132.3, 130.0, 129.9 (d,  $J = 8.2$  Hz), 127.9, 127.2, 126.9, 125.2, 124.0 (d,  $J = 3.4$  Hz), 117.5, 115.5 (d,  $J = 20.8$  Hz), 112.1, 111.9 (d,  $J = 15.9$  Hz), 107.9, 91.5 (d,  $J = 3.2$  Hz), 88.4, 34.9, 30.6.  $^{19}\text{F NMR}$  (565 MHz,  $\text{CDCl}_3$ )  $\delta$  -109.5.

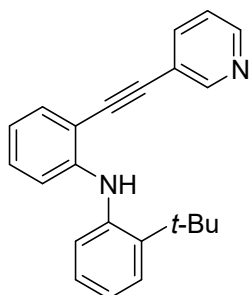



2-(*tert*-butyl)-*N*-(2-(pyridin-3-ylethynyl)phenyl)aniline (**6-17**)

Yellow solid.  $^1\text{H NMR}$  (500 MHz,  $\text{CDCl}_3$ )  $\delta$  = 8.84 – 8.70 (m, 1H), 8.57 (d,  $J$  = 4.9 Hz, 1H), 7.86 – 7.77 (m, 1H), 7.55 – 7.44 (m, 2H), 7.39 (d,  $J$  = 7.9 Hz, 1H), 7.36 – 7.23 (m, 2H), 7.18 (q,  $J$  = 7.6 Hz, 2H), 6.87 (d,  $J$  = 8.4 Hz, 1H), 6.78 (t,  $J$  = 7.5 Hz, 1H), 6.48 (s, 1H), 1.48 (s, 9H).  $^{13}\text{C NMR}$  (126 MHz,  $\text{CDCl}_3$ )  $\delta$  = 151.9, 148.5, 147.2, 144.4, 139.4, 138.1, 132.4, 130.2, 127.2, 127.0, 126.9, 125.0, 123.1, 120.3, 117.8, 112.2, 107.7, 91.7, 89.7, 34.9, 30.6.

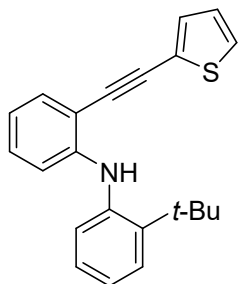

2-(*tert*-butyl)-*N*-(2-(thiophen-2-ylethynyl)phenyl)aniline (**6-18**)

White solid.  $^1\text{H NMR}$  (500 MHz,  $\text{CDCl}_3$ )  $\delta$  = 7.52 – 7.43 (m, 2H), 7.39 (d,  $J$  = 7.8 Hz, 1H), 7.30 (d,  $J$  = 5.2 Hz, 1H), 7.28 – 7.21 (m, 2H), 7.15 (t,  $J$  = 7.6 Hz, 2H), 7.02 (t,  $J$  = 4.3 Hz, 1H), 6.87 (d,  $J$  = 8.4 Hz, 1H), 6.75 (t,  $J$  = 7.4 Hz, 1H), 6.49 (s, 1H), 1.47 (s, 9H).  $^{13}\text{C NMR}$  (126 MHz,  $\text{CDCl}_3$ )  $\delta$  = 146.9, 144.3, 139.6, 132.1, 131.6, 129.8, 127.3, 127.2, 127.1, 126.8, 126.7, 124.7, 123.1, 117.8, 112.0, 108.3, 89.8, 88.3, 34.9, 30.6.

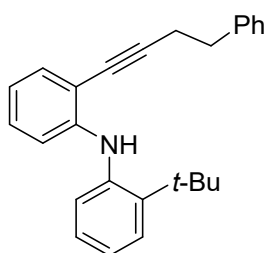

2-(*tert*-butyl)-*N*-(2-(4-phenylbut-1-yn-1-yl)phenyl)aniline (**6-19**)

Pale yellow oil.  $^1\text{H NMR}$  (600 MHz,  $\text{CDCl}_3$ )  $\delta$  7.46 (dd,  $J$  = 8.0, 1.5 Hz, 1H), 7.36 – 7.32 (m, 2H), 7.27 – 7.25 (m, 4H), 7.23 (td,  $J$  = 7.6, 1.5 Hz, 1H), 7.18 (dt,  $J$  = 5.2, 4.2 Hz, 1H), 7.14 (td,  $J$  = 7.9, 1.4 Hz, 1H), 7.10 – 7.06 (m, 1H), 6.80 – 6.74 (m, 1H), 6.69 (td,  $J$  = 7.5, 1.1 Hz, 1H), 6.33 (s, 1H), 2.95 (t,  $J$  = 7.5 Hz, 2H), 2.79 (t,  $J$  = 7.5 Hz, 2H), 1.40 (s, 9H).  $^{13}\text{C NMR}$  (151 MHz,  $\text{CDCl}_3$ )  $\delta$  147.0, 144.4, 140.4, 139.9, 132.0, 128.9, 128.4, 127.1, 127.0, 126.8, 126.4, 124.6, 117.5, 111.8, 109.2, 95.2, 78.1, 35.3, 34.8, 30.5, 22.0.

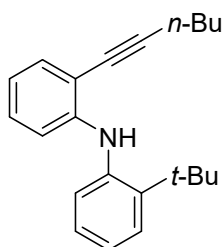

2-(*tert*-butyl)-*N*-(2-(hex-1-yn-1-yl)phenyl)aniline (**6-20**)

Dark yellow oil.  $^1\text{H NMR}$  (600 MHz,  $\text{CDCl}_3$ )  $\delta$  7.47 (dd,  $J$  = 8.0, 1.5 Hz, 1H), 7.38 – 7.33 (m, 2H), 7.22 (td,  $J$  = 7.6, 1.5 Hz, 1H), 7.15 – 7.11 (m, 1H), 7.10 – 7.05 (m, 1H), 6.80 (d,  $J$  = 7.9 Hz, 1H), 6.68 (td,  $J$  = 7.5, 1.0 Hz, 1H), 6.43 (s, 1H), 2.50 (t,  $J$  = 7.1 Hz, 2H), 1.64 – 1.58 (m, 2H), 1.49 (dd,  $J$  = 15.0, 7.4 Hz, 2H), 1.45 (s, 9H), 0.97 – 0.91 (m, 3H).  $^{13}\text{C NMR}$  (151 MHz,  $\text{CDCl}_3$ )  $\delta$  146.8, 144.2, 140.0, 132.1, 128.7, 127.1, 126.8, 124.5, 117.5, 111.7, 109.5, 96.2, 34.9, 31.0, 30.5, 22.1, 19.3, 13.6.

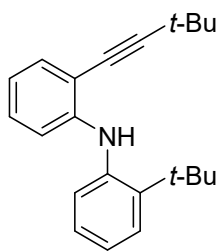

2-(*tert*-butyl)-*N*-(2-(3,3-dimethylbut-1-yn-1-yl)phenyl)aniline (**6-21**)

White solid.  $^1\text{H NMR}$  (500 MHz,  $\text{CDCl}_3$ )  $\delta$  = 7.53 (d,  $J$  = 7.9 Hz, 1H), 7.41 (t,  $J$  = 9.2 Hz, 2H), 7.27 (t,  $J$  = 7.3 Hz, 1H), 7.19 (t,  $J$  = 7.6 Hz, 1H), 7.11 (t,  $J$  = 7.8 Hz, 1H), 6.83 (d,  $J$  = 8.4 Hz, 1H), 6.73 (t,  $J$  = 7.5 Hz, 1H), 6.40 (s, 1H), 1.52 (s, 9H), 1.41 (s, 9H).  $^{13}\text{C NMR}$  (126 MHz,  $\text{CDCl}_3$ )  $\delta$  = 146.7, 144.5, 139.9, 132.2, 128.7, 127.3, 127.1, 126.8, 124.7, 117.5, 111.6, 109.3, 104.3, 75.8, 34.9, 31.2, 30.7, 28.3.

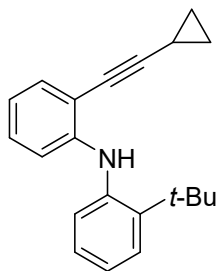

2-(*tert*-butyl)-*N*-(2-(cyclopropylethynyl)phenyl)aniline (**6-22**)

Dark yellow oil.  $^1\text{H NMR}$  (600 MHz,  $\text{CDCl}_3$ )  $\delta$  7.47 (dd,  $J$  = 8.0, 1.5 Hz, 1H), 7.35 (ddd,  $J$  = 13.4, 7.7, 1.4 Hz, 2H), 7.22 (td,  $J$  = 7.6, 1.5 Hz, 1H), 7.15 – 7.10 (m, 1H), 7.10 – 7.05 (m, 1H), 6.84 – 6.79 (m, 1H), 6.68 (td,  $J$  = 7.5, 1.1 Hz, 1H), 6.43 (s, 1H), 1.56 – 1.50 (m, 1H), 1.45 (s, 9H), 0.92 – 0.87 (m, 2H), 0.83 – 0.79 (m, 2H).  $^{13}\text{C NMR}$  (151 MHz,  $\text{CDCl}_3$ )  $\delta$  147.0, 144.0, 139.9, 132.2, 128.7, 127.1, 126.8, 126.5, 124.4, 117.6, 111.7, 109.3, 99.3, 72.5, 34.8, 30.5, 8.8, 0.3.

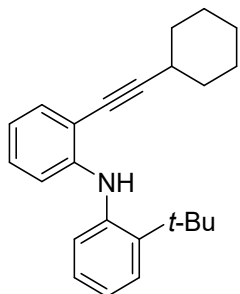

2-(*tert*-butyl)-*N*-(2-(cyclohexylethynyl)phenyl)aniline (**6-23**)

Pale yellow oil.  $^1\text{H NMR}$  (600 MHz,  $\text{CDCl}_3$ )  $\delta$  7.45 (dd,  $J$  = 8.0, 1.4 Hz, 1H), 7.34 (ddd,  $J$  = 7.5, 4.4, 1.2 Hz, 2H), 7.21 (td,  $J$  = 7.7, 1.4 Hz, 1H), 7.14 – 7.10 (m, 1H), 7.07 – 7.03 (m, 1H), 6.76 (d,  $J$  = 8.3 Hz, 1H), 6.67 (td,  $J$  = 7.5, 0.8 Hz, 1H), 6.37 (s, 1H), 2.66 – 2.63 (m, 1H), 1.95 – 1.89 (m, 2H), 1.79 – 1.71 (m, 2H), 1.56 – 1.48 (m, 3H), 1.43 (s, 9H), 1.36 – 1.30 (m, 3H).  $^{13}\text{C NMR}$  (151 MHz,  $\text{CDCl}_3$ )  $\delta$  146.8, 144.5, 140.0, 133.0, 132.1, 128.6, 127.1, 126.8, 126.1, 124.6, 117.5, 111.7, 109.5, 100.4, 34.9, 32.9, 30.6, 30.0, 25.8, 25.0.

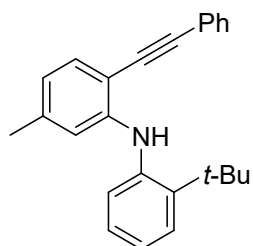

*N*-(2-(*tert*-butyl)phenyl)-5-methyl-2-(phenylethynyl)aniline (**6-24**)

Pale yellow oil.  $^1\text{H NMR}$  (600 MHz,  $\text{CDCl}_3$ )  $\delta$  7.51 – 7.46 (m, 3H), 7.40 (dd,  $J$  = 7.9, 1.2 Hz, 1H), 7.37 (d,  $J$  = 7.8 Hz, 1H), 7.36 – 7.30 (m, 3H), 7.26 – 7.23 (m, 1H), 7.17 – 7.12 (m, 1H), 6.68 (s, 1H), 6.58 (dd,  $J$  = 7.8, 0.8 Hz, 1H), 6.48 (s, 1H), 2.24 (s, 3H), 1.46 (s, 9H).

<sup>13</sup>C NMR (151 MHz, CDCl<sub>3</sub>) δ 146.8, 144.2, 140.1, 139.8, 132.1, 131.3, 128.4, 128.1, 127.2, 126.9, 126.8, 124.6, 123.3, 118.9, 112.4, 105.8, 94.7, 86.4, 34.9, 30.6, 22.0.

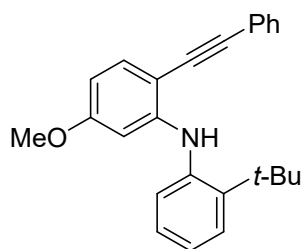

*N*-(2-(*tert*-butyl)phenyl)-5-methoxy-2-(phenylethynyl)aniline (**6-25**)

Pale yellow oil. <sup>1</sup>H NMR (600 MHz, CDCl<sub>3</sub>) δ 7.48 (dt, *J* = 6.5, 1.6 Hz, 3H), 7.42 – 7.38 (m, 2H), 7.36 – 7.29 (m, 3H), 7.24 (td, *J* = 7.6, 1.5 Hz, 1H), 7.15 (td, *J* = 7.8, 1.4 Hz, 1H), 6.53 (s, 1H), 6.36 (d, *J* = 2.4 Hz, 1H), 6.33 (dd, *J* = 8.5, 2.5 Hz, 1H), 3.72 (s, 3H), 1.45 (s, 9H).

<sup>13</sup>C NMR (151 MHz, CDCl<sub>3</sub>) δ 161.1, 148.5, 144.6, 139.3, 133.4, 131.1, 128.4, 127.9, 127.3, 127.2, 126.9, 125.0, 123.4, 103.6, 101.4, 97.6, 94.2, 86.3, 55.2, 34.9, 30.6.

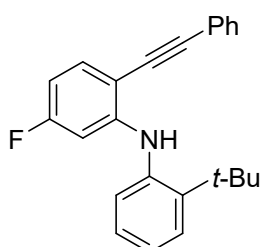

*N*-(2-(*tert*-butyl)phenyl)-5-fluoro-2-(phenylethynyl)aniline (**6-26**)

Dark yellow oil. <sup>1</sup>H NMR (600 MHz, CDCl<sub>3</sub>) δ 7.52 – 7.47 (m, 3H), 7.42 (dd, *J* = 8.5, 6.4 Hz, 1H), 7.37 – 7.33 (m, 4H), 7.26 (ddd, *J* = 7.7, 6.5, 1.5 Hz, 1H), 7.19 (td, *J* = 7.7, 1.5 Hz, 1H), 6.60 (s, 1H), 6.48 (dd, *J* = 11.6, 2.5 Hz, 1H), 6.43 (td, *J* = 8.4, 2.5 Hz, 1H), 1.44 (s, 9H). <sup>13</sup>C NMR (151 MHz, CDCl<sub>3</sub>) δ 164.0 (d, *J* = 247.1 Hz), 149.0 (d, *J* = 11.8 Hz), 145.1, 138.7, 133.6 (d, *J* = 10.7 Hz), 131.3, 128.4, 128.3, 127.7, 127.4, 127.1, 125.6, 122.9, 104.7 (d, *J* = 22.9 Hz), 104.3 (d, *J* = 2.1 Hz), 98.7 (d, *J* = 27.3 Hz), 94.8 (d, *J* = 1.4 Hz), 85.3, 34.9, 30.6. <sup>19</sup>F NMR (565 MHz, CDCl<sub>3</sub>) δ -108.4.

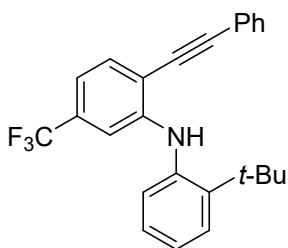

*N*-(2-(*tert*-butyl)phenyl)-2-(phenylethynyl)-5-(trifluoromethyl)aniline (**6-27**)

Yellow solid. <sup>1</sup>H NMR (600 MHz, CDCl<sub>3</sub>) δ 7.75 (d, *J* = 8.3 Hz, 0.28H), 7.65 (d, *J* = 8.2 Hz, 0.3H), 7.56 – 7.48 (m, 4.31H), 7.40 – 7.33 (m, 4.56H), 7.32 – 7.26 (m, 1.72H), 7.22 – 7.19 (m, 2.18H), 7.13 (s, 0.29H), 7.01 (s, 1H), 6.97 (d, *J* = 8.0 Hz, 1H), 6.91 (s, 0.27H), 6.65 (s, 1H), 1.45 (s, 9H), 0.90 (s, 2.6H). <sup>13</sup>C NMR (151 MHz, CDCl<sub>3</sub>) δ 148.4, 147.2, 145.0, 144.1, 139.8, 138.6, 134.7, 132.5, 132.31 (q, *J* = 11.9 Hz), 131.7, 131.5, 131.2, 130.3, 129.9, 129.4, 128.8, 128.5, 128.4, 127.9, 127.5, 127.2 (q, *J* = 8.7 Hz), 127.0, 125.7, 124.9, 123.1, 122.4, 120.6, 116.8 (q, *J* = 3.3 Hz), 113.9 (q, *J* = 3.6 Hz), 111.6, 108.9 (q, *J* = 4.3 Hz), 108.0 (d, *J* = 3.7 Hz), 102.4, 97.0, 84.8, 36.0, 34.9, 31.3, 30.6. <sup>19</sup>F NMR (565 MHz, CDCl<sub>3</sub>) δ -60.4, -63.0.

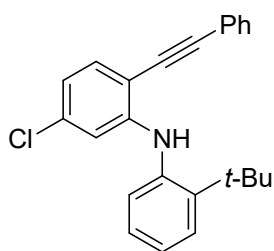

*N*-(2-(*tert*-butyl)phenyl)-5-chloro-2-(phenylethynyl)aniline (**6-28**)

Yellow oil.  $^1\text{H NMR}$  (500 MHz,  $\text{CDCl}_3$ )  $\delta$  = 7.49 (td,  $J$  = 7.0, 2.6 Hz, 3H), 7.38 – 7.32 (m, 5H), 7.28 – 7.24 (m, 1H), 7.18 (td,  $J$  = 7.5, 1.6 Hz, 1H), 6.75 (d,  $J$  = 2.0 Hz, 1H), 6.69 (dd,  $J$  = 8.2, 2.0 Hz, 1H), 6.53 (s, 1H), 1.43 (s, 9H).  $^{13}\text{C NMR}$  (126 MHz,  $\text{CDCl}_3$ )  $\delta$  = 148.1, 145.1, 138.7, 135.7, 133.1, 131.4, 128.5, 127.6, 127.4, 127.2, 125.6, 122.8, 117.8, 111.5, 106.9, 102.2, 95.9, 85.2, 34.9, 30.7.

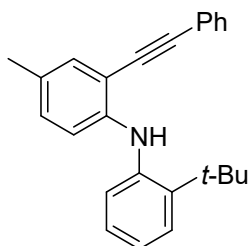

*N*-(2-(*tert*-butyl)phenyl)-4-methyl-2-(phenylethynyl)aniline (**6-29**)

Pale yellow solid.  $^1\text{H NMR}$  (600 MHz,  $\text{CDCl}_3$ )  $\delta$  7.57 – 7.45 (m, 3H), 7.44 – 7.31 (m, 5H), 7.24 (dd,  $J$  = 15.5, 8.5 Hz, 1H), 7.18 – 7.10 (m, 1H), 6.98 (d,  $J$  = 8.6 Hz, 1H), 6.87 – 6.79 (m, 1H), 6.47 – 6.36 (m, 1H), 2.35 – 2.20 (m, 3H), 1.54 – 1.39 (m, 9H).  $^{13}\text{C NMR}$  (151 MHz,  $\text{CDCl}_3$ )  $\delta$  144.6, 143.8, 140.2, 132.4, 131.3, 130.4, 128.4, 128.2, 127.1, 127.1, 126.8, 126.2, 124.2, 123.2, 112.3, 108.7, 94.9, 86.4, 34.8, 30.6, 20.3.

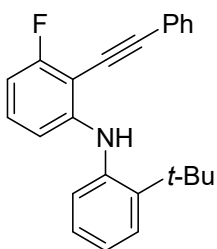

*N*-(2-(*tert*-butyl)phenyl)-3-fluoro-2-(phenylethynyl)aniline (**6-30**)

Pale yellow oil.  $^1\text{H NMR}$  (600 MHz,  $\text{CDCl}_3$ )  $\delta$  7.62 (dd,  $J$  = 8.2, 1.1 Hz, 0.17H), 7.57 – 7.51 (m, 1.85H), 7.50 – 7.45 (m, 1.16H), 7.38 – 7.32 (m, 3.82H), 7.32 – 7.28 (m, 0.51H), 7.24 (dd,  $J$  = 7.6, 1.0 Hz, 1.05H), 7.22 – 7.20 (m, 0.62H), 7.20 – 7.15 (m, 1.06H), 7.05 (dt,  $J$  = 7.9, 6.8 Hz, 1.17H), 6.94 (s, 0.18H), 6.81 (dd,  $J$  = 10.1, 7.8 Hz, 0.18H), 6.65 (d,  $J$  = 8.2 Hz, 0.19H), 6.55 (d,  $J$  = 8.7 Hz, 1.83H), 6.49 (t,  $J$  = 8.6 Hz, 1H), 1.44 (s, 9H), 0.91 (s, 1.61H).  $^{13}\text{C NMR}$  (151 MHz,  $\text{CDCl}_3$ )  $\delta$  163.5 (d,  $J$  = 248.8 Hz), 156.0 (d,  $J$  = 247.2 Hz), 148.7 (d,  $J$  = 4.3 Hz), 148.4, 145.0, 143.3 (d,  $J$  = 11.1 Hz), 141.5, 139.1, 135.3, 132.5, 132.4, 131.4, 130.1, 130.1 (d,  $J$  = 10.2 Hz), 129.1, 128.6, 128.4, 128.3 (d,  $J$  = 4.6 Hz), 127.7, 127.5, 127.1 (d,  $J$  = 51.2 Hz), 126.8, 125.5, 122.8, 122.3 (d,  $J$  = 7.8 Hz), 116.8 (d,  $J$  = 22.7 Hz), 107.6 (d,  $J$  = 3.4 Hz), 107.2 (d,  $J$  = 2.7 Hz), 104.8 (d,  $J$  = 18.8 Hz), 104.2 (d,  $J$  = 21.2 Hz), 99.9 (d,  $J$  = 3.1 Hz), 98.1, 97.6 (d,  $J$  = 19.0 Hz), 79.9 (d,  $J$  = 2.2 Hz), 36.0, 34.9, 31.3, 30.6.  $^{19}\text{F NMR}$  (565 MHz,  $\text{CDCl}_3$ )  $\delta$  -109.4, -122.8.

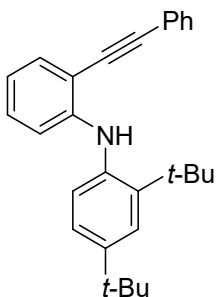

2,4-di-*tert*-butyl-*N*-(2-(phenylethynyl)phenyl)aniline (**6-31**)

Pale yellow solid. <sup>1</sup>H NMR (600 MHz, CDCl<sub>3</sub>) δ 7.50 (d, *J* = 3.1 Hz, 3H), 7.46 (d, *J* = 7.6 Hz, 1H), 7.34 (d, *J* = 5.9 Hz, 3H), 7.30 (d, *J* = 8.2 Hz, 1H), 7.25 (d, *J* = 8.6 Hz, 1H), 7.13 (t, *J* = 7.7 Hz, 1H), 6.81 (d, *J* = 8.3 Hz, 1H), 6.72 (t, *J* = 7.4 Hz, 1H), 6.43 (s, 1H), 1.46 (s, 9H), 1.36 (s, 9H). <sup>13</sup>C NMR (151 MHz, CDCl<sub>3</sub>) δ 147.6, 147.4, 144.0, 136.9, 132.1, 131.3, 129.6, 128.4, 128.2, 126.9, 124.1, 123.7, 123.1, 117.3, 111.9, 108.2, 95.1, 86.3, 35.2, 34.7, 31.5, 30.7.

## 2.2 General Procedure for the Synthesis of Linear Products 3 and Characterization

An oven-dried 10 mL Schlenk tube was charged with  $\text{Pd}(\text{CH}_3\text{CN})_4(\text{BF}_4)_2$  (4.4 mg, 0.01 mmol, 5 mol%), DPEphos (5.4 mg, 0.01 mmol, 5 mol%), the above mentioned mixture was degassed and refilled with CO for 3 times. Then, a solution of **1** (0.2 mmol), **2** (0.24 mmol) and  $\text{Et}_3\text{SiH}$  (100  $\mu\text{L}$ , 0.6 mmol, 3.0 eq.) in 4 mL of dry  $\text{CH}_3\text{CN}$  were added to the mixture by syringe. Finally, the mixture was stirred at 40 °C for 24 h under CO balloon. After completion of the reaction, the crude reaction mixture was concentrated in vacuo and the residue was dissolved in  $\text{CDCl}_3$ , then the L/B ratio of the product is determined by  $^1\text{H}$  NMR. Finally, these  $\text{CDCl}_3$  fractions were collected and concentrated again, and the residue was purified by silica gel flash column chromatography to (hexane/EtOAc) to give products **3**.

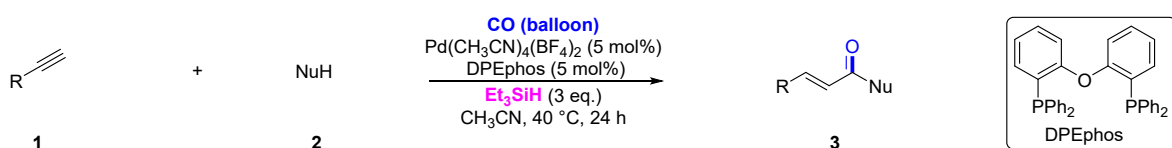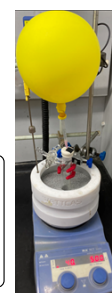

### Characterization of Products 3<sup>2</sup>

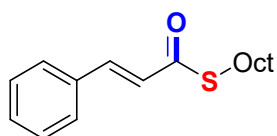

#### S-octyl (*E*)-3-phenylprop-2-enethioate (**3-1**)

White solid (45.8 mg, 83% yield).  $^1\text{H}$  NMR (500 MHz,  $\text{CDCl}_3$ )  $\delta$  = 7.60 (d,  $J$  = 15.8 Hz, 1H), 7.57 – 7.51 (m, 2H), 7.41 – 7.36 (m, 3H), 6.71 (d,  $J$  = 15.8 Hz, 1H), 3.01 (t,  $J$  = 7.4 Hz, 2H), 1.64 (p,  $J$  = 7.4 Hz, 2H), 1.40 (q,  $J$  = 7.0 Hz, 2H), 1.34 – 1.26 (m, 8H), 0.88 (t,  $J$  = 6.8 Hz, 3H).  $^{13}\text{C}$  NMR (126 MHz,  $\text{CDCl}_3$ )  $\delta$  = 190.0, 140.1, 134.2, 130.4, 128.9, 128.3, 125.2, 31.8, 29.6, 29.1, 29.1, 29.0, 28.9, 22.6, 14.0.

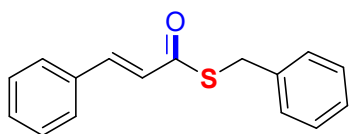

#### S-benzyl (*E*)-3-phenylprop-2-enethioate (**3-2**)

White solid (43.2 mg, 85% yield).  $^1\text{H}$  NMR (500 MHz,  $\text{CDCl}_3$ )  $\delta$  = 7.65 (d,  $J$  = 15.8 Hz, 1H), 7.54 (dd,  $J$  = 6.7, 2.9 Hz, 2H), 7.40 (dd,  $J$  = 5.1, 2.0 Hz, 3H), 7.36 (d,  $J$  = 7.0 Hz, 2H), 7.32 (t,  $J$  = 7.5 Hz, 2H), 7.29 – 7.24 (m, 1H), 6.73 (d,  $J$  = 15.8 Hz, 1H), 4.28 (s, 2H).  $^{13}\text{C}$  NMR (126 MHz,  $\text{CDCl}_3$ )  $\delta$  = 189.1, 140.9, 137.6, 134.1, 130.6, 128.9, 128.9, 128.6, 128.4, 127.3, 124.6, 33.2.

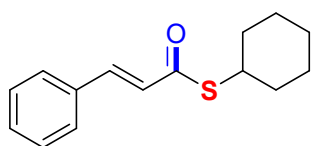

#### S-cyclohexyl (*E*)-3-phenylprop-2-enethioate (**3-3**)

White solid (39.9 mg, 81% yield).  $^1\text{H}$  NMR (500 MHz,  $\text{CDCl}_3$ )  $\delta$  = 7.58 (d,  $J$  = 15.9 Hz, 1H), 7.53 (dd,  $J$  = 6.7, 3.0 Hz, 2H), 7.42 – 7.36 (m, 3H), 6.68 (d,  $J$  = 15.8 Hz, 1H), 3.68 (dd,  $J$  = 9.4, 4.8 Hz, 1H), 1.99 (dt,  $J$  = 9.8, 5.8 Hz, 2H), 1.74 (q,  $J$  = 5.0 Hz, 2H), 1.65 – 1.59 (m,

1H), 1.48 (td,  $J = 9.9, 2.7$  Hz, 4H), 1.36 – 1.26 (m, 1H).  $^{13}\text{C}$  NMR (126 MHz,  $\text{CDCl}_3$ )  $\delta = 189.7, 140.0, 134.3, 130.4, 128.9, 128.3, 125.5, 42.4, 33.1, 25.9, 25.6$ .

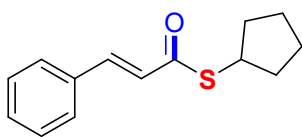

*S*-cyclopentyl (*E*)-3-phenylprop-2-enthioate (**3-4**)

Yellow oil (38.1 mg, 82% yield).  $^1\text{H}$  NMR (500 MHz,  $\text{CDCl}_3$ )  $\delta = 7.58$  (d,  $J = 15.8$  Hz, 1H), 7.53 (dd,  $J = 6.7, 3.0$  Hz, 2H), 7.42 – 7.35 (m, 3H), 6.68 (d,  $J = 15.8$  Hz, 1H), 3.87 (p,  $J = 6.9$  Hz, 1H), 2.16 (dt,  $J = 12.4, 6.3$  Hz, 2H), 1.80 – 1.68 (m, 2H), 1.68 – 1.58 (m, 4H).  $^{13}\text{C}$  NMR (126 MHz,  $\text{CDCl}_3$ )  $\delta = 190.6, 140.0, 134.3, 130.4, 128.9, 128.3, 125.2, 42.5, 33.3, 24.8$ .

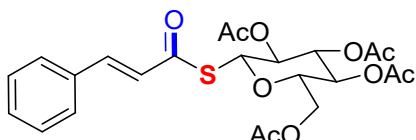

2-(acetoxymethyl)-6-(cinnamoylthio)tetrahydro-2*H*-pyran-3,4,5-triyl triacetate (**3-5**)

White solid (60.3 mg, 61% yield).  $^1\text{H}$  NMR (500 MHz,  $\text{CDCl}_3$ )  $\delta = 7.65$  (d,  $J = 15.8$  Hz, 1H), 7.54 (d,  $J = 7.0$  Hz, 2H), 7.41 (d,  $J = 7.3$  Hz, 3H), 6.68 (d,  $J = 15.8$  Hz, 1H), 5.43 (d,  $J = 10.4$  Hz, 1H), 5.32 (t,  $J = 9.3$  Hz, 1H), 5.21 (t,  $J = 9.8$  Hz, 1H), 5.14 (t,  $J = 9.6$  Hz, 1H), 4.29 (dd,  $J = 12.6, 4.4$  Hz, 1H), 4.11 (d,  $J = 12.5$  Hz, 1H), 3.89 (d,  $J = 7.7$  Hz, 1H), 2.08 (s, 3H), 2.04 (s, 3H), 2.02 (s, 3H), 2.01 (s, 3H).  $^{13}\text{C}$  NMR (126 MHz,  $\text{CDCl}_3$ )  $\delta = 185.9, 170.7, 170.1, 169.5, 169.4, 143.2, 133.6, 131.2, 129.1, 128.6, 124.0, 80.0, 76.4, 74.0, 69.2, 68.0, 61.7, 20.7, 20.6, 20.6$ . HRMS (ESI): calcd for  $\text{C}_{23}\text{H}_{27}\text{O}_{10}\text{S}$   $[\text{M}+\text{H}]^+$  495.1320; found 495.1313.

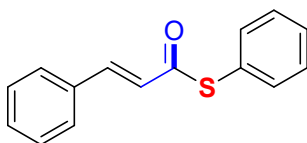

*S*-phenyl (*E*)-3-phenylprop-2-enthioate (**3-6**)

White solid (42.7 mg, 89% yield).  $^1\text{H}$  NMR (500 MHz,  $\text{CDCl}_3$ )  $\delta = 7.69$  (d,  $J = 15.8$  Hz, 1H), 7.58 – 7.56 (m, 2H), 7.51 – 7.50 (m, 2H), 7.45 – 7.44 (m, 3H), 7.42 – 7.41 (m, 3H), 6.80 (d,  $J = 15.8$  Hz, 1H).  $^{13}\text{C}$  NMR (126 MHz,  $\text{CDCl}_3$ )  $\delta = 187.9, 141.5, 134.6, 134.0, 130.7, 129.4, 129.2, 129.0, 128.5, 127.6, 124.2$ .

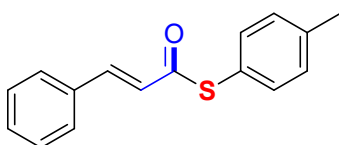

*S*-(*p*-tolyl) (*E*)-3-phenylprop-2-enthioate (**3-7**)

White solid (42.2 mg, 83% yield).  $^1\text{H}$  NMR (500 MHz,  $\text{CDCl}_3$ )  $\delta = 7.68$  (d,  $J = 15.8$  Hz, 1H), 7.62 – 7.53 (m, 2H), 7.49 – 7.33 (m, 5H), 7.25 (d,  $J = 5.3$  Hz, 2H), 6.79 (d,  $J = 15.8$  Hz, 1H), 2.40 (s, 3H).  $^{13}\text{C}$  NMR (126 MHz,  $\text{CDCl}_3$ )  $\delta = 188.4, 141.3, 139.7, 134.6, 134.1, 130.7, 130.0, 129.0, 128.5, 124.2, 124.1, 21.3$ .

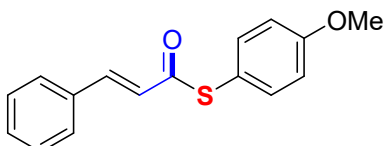

*S*-(4-methoxyphenyl) (*E*)-3-phenylprop-2-enthioate (**3-8**)

White solid (43.2 mg, 80% yield).  $^1\text{H}$  NMR (500 MHz,  $\text{CDCl}_3$ )  $\delta = 7.68$  (d,  $J = 15.8$  Hz, 1H), 7.57 (dd,  $J = 6.8, 2.9$  Hz, 2H), 7.41 (dd,  $J = 8.0, 2.4$  Hz, 5H), 7.01 – 6.93 (m, 2H), 6.80 (d,  $J = 15.8$  Hz, 1H), 3.84 (s, 3H).  $^{13}\text{C}$  NMR (126 MHz,  $\text{CDCl}_3$ )  $\delta = 188.9, 160.7, 141.3, 136.2, 134.1, 130.6, 128.9, 128.4, 124.1, 118.2, 114.9, 55.3$ .

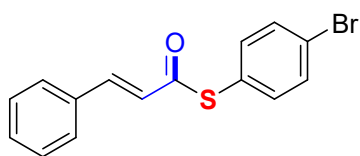

S-(4-bromophenyl) (*E*)-3-phenylprop-2-enethioate (**3-9**)

White solid (21.1 mg, 33% yield).  $^1\text{H NMR}$  (500 MHz,  $\text{CDCl}_3$ )  $\delta$  7.69 (d,  $J$  = 15.8 Hz, 1H), 7.57 (d,  $J$  = 8.3 Hz, 4H), 7.42 (d,  $J$  = 6.4 Hz, 3H), 7.35 (d,  $J$  = 8.3 Hz, 2H), 6.78 (d,  $J$  = 15.8 Hz, 1H).  $^{13}\text{C NMR}$  (126 MHz,  $\text{CDCl}_3$ )  $\delta$  = 187.2, 142.0, 136.0, 133.9, 132.4, 130.9, 129.0, 128.5, 126.8, 124.1, 123.9.

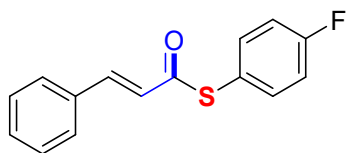

S-(4-fluorophenyl) (*E*)-3-phenylprop-2-enethioate (**3-10**)

White solid (22.2 mg, 43% yield).  $^1\text{H NMR}$  (500 MHz,  $\text{CDCl}_3$ )  $\delta$  = 7.68 (d,  $J$  = 15.8 Hz, 1H), 7.60 – 7.54 (m, 2H), 7.50 – 7.44 (m, 2H), 7.42 (dd,  $J$  = 5.2, 1.9 Hz, 3H), 7.14 (t,  $J$  = 8.6 Hz, 2H), 6.79 (d,  $J$  = 15.8 Hz, 1H).  $^{13}\text{C NMR}$  (126 MHz,  $\text{CDCl}_3$ )  $\delta$  = 187.9, 163.5 (d,  $J$  = 249.9 Hz), 141.8, 136.7 (d,  $J$  = 8.3 Hz), 133.9, 130.9, 129.0, 128.5, 123.9, 122.9 (d,  $J$  = 3.4 Hz), 116.5 (d,  $J$  = 22.5 Hz).  $^{19}\text{F NMR}$  (471 MHz,  $\text{CDCl}_3$ )  $\delta$  = -111.1.

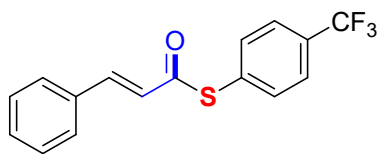

S-(4-(trifluoromethyl)phenyl) (*E*)-3-phenylprop-2-enethioate (**3-11**)

White solid (37.0 mg, 60% yield).  $^1\text{H NMR}$  (500 MHz,  $\text{CDCl}_3$ )  $\delta$  = 7.74 – 7.67 (m, 3H), 7.63 (d,  $J$  = 8.1 Hz, 2H), 7.61 – 7.56 (m, 2H), 7.43 (d,  $J$  = 6.2 Hz, 3H), 6.79 (d,  $J$  = 15.8 Hz, 1H).  $^{13}\text{C NMR}$  (126 MHz,  $\text{CDCl}_3$ )  $\delta$  = 186.5, 142.4, 134.6, 133.8, 132.4, 131.3 (q,  $J$  = 32.7 Hz), 131.0, 129.1, 128.6, 125.9 (q,  $J$  = 3.7 Hz), 123.8, 123.8 (q,  $J$  = 274.0 Hz).  $^{19}\text{F NMR}$  (471 MHz,  $\text{CDCl}_3$ )  $\delta$  = -62.8.

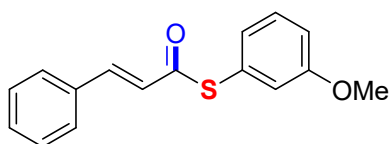

S-(3-methoxyphenyl) (*E*)-3-phenylprop-2-enethioate (**3-12**)

White solid (44.3 mg, 82% yield).  $^1\text{H NMR}$  (500 MHz,  $\text{CDCl}_3$ )  $\delta$  = 7.69 (d,  $J$  = 15.8 Hz, 1H), 7.57 (dd,  $J$  = 7.1, 2.7 Hz, 2H), 7.42 (dd,  $J$  = 5.3, 2.0 Hz, 3H), 7.36 (t,  $J$  = 8.0 Hz, 1H), 7.10 (dd,  $J$  = 7.6, 1.5 Hz, 1H), 7.07 (t,  $J$  = 2.0 Hz, 1H), 6.99 (dd,  $J$  = 8.4, 2.6 Hz, 1H), 6.80 (d,  $J$  = 15.8 Hz, 1H), 3.83 (s, 3H).  $^{13}\text{C NMR}$  (126 MHz,  $\text{CDCl}_3$ )  $\delta$  = 187.8, 159.9, 141.5, 134.0, 130.7, 129.9, 129.0, 128.5, 128.5, 126.7, 124.1, 119.6, 115.7, 55.3.

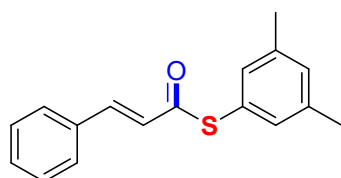

S-(*m*-tolyl) (*E*)-3-phenylprop-2-enethioate (**3-13**)

Pale yellow oil (24.1 mg, 45% yield).  $^1\text{H NMR}$  (500 MHz,  $\text{CDCl}_3$ )  $\delta$  7.67 (d,  $J$  = 15.8 Hz, 1H), 7.61 – 7.52 (m, 2H), 7.44 – 7.39 (m, 3H), 7.12 (s, 2H), 7.07 (s, 1H), 6.79 (d,  $J$  = 15.8 Hz, 1H), 2.35 (s, 6H).  $^{13}\text{C NMR}$  (126 MHz,  $\text{CDCl}_3$ )  $\delta$  188.5, 141.3, 138.9, 134.1, 132.2, 131.4, 130.7, 129.0, 128.5, 126.8, 124.1, 21.2.



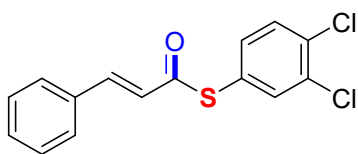

S-(3,4-dichlorophenyl) (E)-3-phenylprop-2-enethioate (**3-14**)

White solid (48.0 mg, 78 yield).  $^1\text{H NMR}$  (500 MHz,  $\text{CDCl}_3$ )  $\delta$  = 7.69 (d,  $J$  = 15.8 Hz, 1H), 7.62 – 7.55 (m, 3H), 7.51 (d,  $J$  = 8.3 Hz, 1H), 7.46 – 7.39 (m, 3H), 7.32 (dd,  $J$  = 8.3, 2.1 Hz, 1H), 6.77 (d,  $J$  = 15.8 Hz, 1H).  $^{13}\text{C NMR}$  (126 MHz,  $\text{CDCl}_3$ )  $\delta$  = 186.6, 142.5, 136.0, 134.1, 133.7, 133.7, 133.1, 131.1, 130.9, 129.1, 128.6, 127.6, 123.6.

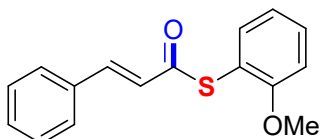

S-(2-methoxyphenyl) (E)-3-phenylprop-2-enethioate (**3-15**)

White solid (41.0 mg, 76% yield).  $^1\text{H NMR}$  (500 MHz,  $\text{CDCl}_3$ )  $\delta$  = 7.67 (d,  $J$  = 15.8 Hz, 1H), 7.56 (dd,  $J$  = 6.8, 2.9 Hz, 2H), 7.50 – 7.42 (m, 2H), 7.40 (dd,  $J$  = 5.0, 1.9 Hz, 3H), 7.05 – 7.02 (m, 1H), 7.01 (dd,  $J$  = 8.5, 1.2 Hz, 1H), 6.82 (d,  $J$  = 15.8 Hz, 1H), 3.87 (s, 3H).  $^{13}\text{C NMR}$  (126 MHz,  $\text{CDCl}_3$ )  $\delta$  = 187.3, 159.4, 141.2, 136.9, 134.2, 131.7, 130.6, 129.0, 128.4, 124.3, 121.1, 115.7, 111.6, 56.1.

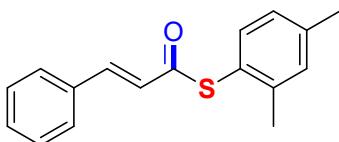

S-(2,4-dimethylphenyl) (E)-3-phenylprop-2-enethioate (**3-16**)

White solid (38.1 mg, 71% yield).  $^1\text{H NMR}$  (500 MHz,  $\text{CDCl}_3$ )  $\delta$  = 7.67 (d,  $J$  = 15.8 Hz, 1H), 7.57 (dd,  $J$  = 6.7, 2.9 Hz, 2H), 7.44 – 7.37 (m, 3H), 7.35 (d,  $J$  = 7.8 Hz, 1H), 7.17 (s, 1H), 7.07 (dd,  $J$  = 7.7, 1.9 Hz, 1H), 6.82 (d,  $J$  = 15.8 Hz, 1H), 2.36 (s, 3H), 2.36 (s, 3H).  $^{13}\text{C NMR}$  (126 MHz,  $\text{CDCl}_3$ )  $\delta$  = 188.1, 142.0, 141.2, 140.4, 135.9, 134.1, 131.7, 130.6, 129.0, 128.4, 127.5, 124.3, 123.6, 21.2, 20.7.

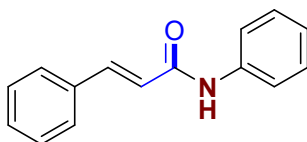

N-phenylcinnamamide (**3-17**)

White solid (35.7 mg, 80% yield).  $^1\text{H NMR}$  (500 MHz,  $\text{CDCl}_3$ )  $\delta$  = 7.83 (s, 1H), 7.75 (d,  $J$  = 15.5 Hz, 1H), 7.65 (d,  $J$  = 7.8 Hz, 2H), 7.47 (dd,  $J$  = 6.8, 2.8 Hz, 2H), 7.40 – 7.29 (m, 5H), 7.12 (t,  $J$  = 7.5 Hz, 1H), 6.61 (d,  $J$  = 15.6 Hz, 1H).  $^{13}\text{C NMR}$  (126 MHz,  $\text{CDCl}_3$ )  $\delta$  = 164.2, 142.3, 138.1, 134.6, 129.9, 129.0, 128.8, 127.9, 124.4, 120.9, 120.1.

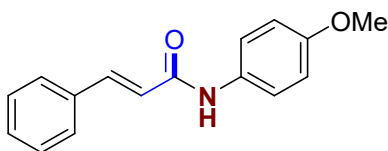

N-(4-methoxyphenyl)cinnamamide (**3-18**)

White solid (27.3 mg, 54% yield).  $^1\text{H NMR}$  (500 MHz, Methanol- $d_4$ )  $\delta$  = 7.62 (d,  $J$  = 15.7 Hz, 1H), 7.56 (t,  $J$  = 9.1 Hz, 4H), 7.38 (q,  $J$  = 7.9 Hz, 3H), 6.88 (d,  $J$  = 8.5 Hz, 2H), 6.76 (d,  $J$  = 15.6 Hz, 1H), 3.76 (s, 3H).  $^{13}\text{C NMR}$  (126 MHz, Methanol- $d_4$ )  $\delta$  = 165.0, 156.6, 141.0, 134.9, 131.6, 129.5, 128.6, 127.5, 121.5, 120.9, 113.6, 54.5.

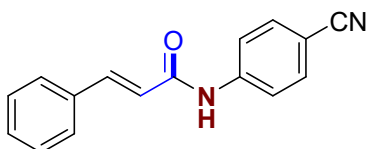

*N*-(4-cyanophenyl)cinnamamide (**3-19**)

White solid (57.2 mg, 96% yield).  $^1\text{H NMR}$  (500 MHz, DMSO- $d_6$ )  $\delta$  = 10.65 (s, 1H), 7.92 – 7.86 (m, 2H), 7.86 – 7.77 (m, 2H), 7.66 (d,  $J$  = 4.3 Hz, 1H), 7.66 – 7.61 (m, 2H), 7.51 – 7.38 (m, 3H), 6.83 (d,  $J$  = 15.7 Hz, 1H).  $^{13}\text{C NMR}$  (126 MHz, DMSO- $d_6$ )  $\delta$  = 164.7, 143.9, 141.9, 134.9, 133.8, 130.6, 129.6, 128.4, 122.0, 119.8, 119.6, 105.5.

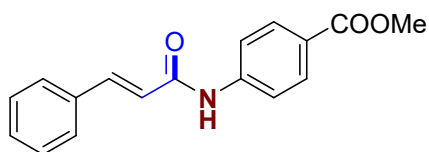

methyl 4-cinnamamidobenzoate (**3-20**)

Yellow solid (48.3 mg, 86% yield).  $^1\text{H NMR}$  (500 MHz, CDCl $_3$ )  $\delta$  = 8.07 – 8.01 (m, 2H), 7.79 (d,  $J$  = 15.5 Hz, 1H), 7.72 (d,  $J$  = 8.4 Hz, 2H), 7.60 (s, 1H), 7.53 (dd,  $J$  = 6.4, 3.1 Hz, 2H), 7.41 – 7.36 (m, 3H), 6.57 (d,  $J$  = 15.5 Hz, 1H), 3.91 (s, 3H).  $^{13}\text{C NMR}$  (126 MHz, CDCl $_3$ )  $\delta$  = 166.6, 164.0, 143.4, 142.2, 134.4, 130.9, 130.3, 129.0, 128.1, 125.7, 120.2, 119.0, 52.0.

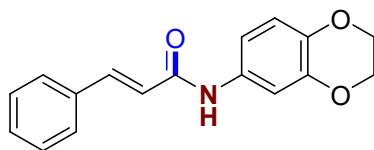

*N*-(2,3-dihydrobenzo[*b*][1,4]dioxin-6-yl)cinnamamide (**3-21**)

White solid (36.0 mg, 64% yield).  $^1\text{H NMR}$  (500 MHz, Methanol- $d_4$ )  $\delta$  7.61 (d,  $J$  = 15.7 Hz, 1H), 7.57 (d,  $J$  = 6.8 Hz, 2H), 7.41 – 7.35 (m, 3H), 7.29 (d,  $J$  = 2.0 Hz, 1H), 7.01 (dd,  $J$  = 8.6, 2.1 Hz, 1H), 6.77 (d,  $J$  = 8.7 Hz, 1H), 6.73 (d,  $J$  = 15.7 Hz, 1H), 4.21 (d,  $J$  = 3.5 Hz, 4H).  $^{13}\text{C NMR}$  (126 MHz, Methanol- $d_4$ )  $\delta$  = 165.0, 143.4, 141.1, 140.6, 134.9, 132.2, 129.5, 128.6, 127.5, 120.9, 116.6, 113.2, 109.3, 64.3, 64.2.

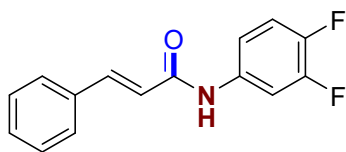

*N*-(3,4-difluorophenyl)cinnamamide (**3-22**)

White solid (45.6 mg, 88% yield).  $^1\text{H NMR}$  (500 MHz, Methanol- $d_4$ )  $\delta$  7.80 (ddd,  $J$  = 12.7, 7.3, 2.3 Hz, 1H), 7.65 (d,  $J$  = 15.7 Hz, 1H), 7.59 – 7.54 (m, 2H), 7.42 – 7.34 (m, 3H), 7.31 – 7.26 (m, 1H), 7.22 – 7.16 (m, 1H), 6.72 (d,  $J$  = 15.7 Hz, 1H).  $^{13}\text{C NMR}$  (126 MHz, Methanol- $d_4$ )  $\delta$  = 165.2, 149.77 (dd,  $J$  = 244.8, 13.2 Hz), 146.55 (dd,  $J$  = 243.6, 12.7 Hz), 141.9, 135.6 (dd,  $J$  = 8.9, 3.2 Hz), 134.7, 129.8, 128.6, 127.6, 120.4, 116.8 (d,  $J$  = 18.4 Hz), 115.6 (dd,  $J$  = 8.9, 3.2 Hz), 108.9 (d,  $J$  = 22.0 Hz).  $^{19}\text{F NMR}$  (471 MHz, Methanol- $d_4$ )  $\delta$  = -139.0, -145.9.

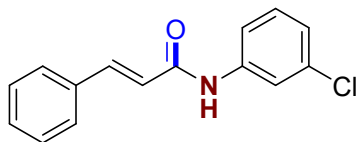

*N*-(3-chlorophenyl)cinnamamide (**3-23**)

White solid (47.8 mg, 93% yield).  $^1\text{H NMR}$  (500 MHz, Methanol- $d_4$ )  $\delta$  7.86 (t,  $J$  = 1.7 Hz, 1H), 7.66 (d,  $J$  = 15.7 Hz, 1H), 7.59 – 7.57 (m, 2H), 7.49 (dd,  $J$  = 8.1, 1.0 Hz, 1H), 7.42 – 7.35 (m, 3H), 7.28 (t,  $J$  = 8.1 Hz, 1H), 7.09 (dd,  $J$  = 8.0, 1.1 Hz, 1H), 6.75 (d,  $J$  = 15.7 Hz, 1H).  $^{13}\text{C NMR}$  (126 MHz, Methanol- $d_4$ )  $\delta$  = 165.3, 141.9, 140.1, 134.7, 134.1, 129.7, 129.7, 128.6, 127.6, 123.6, 120.5, 119.5, 117.7.

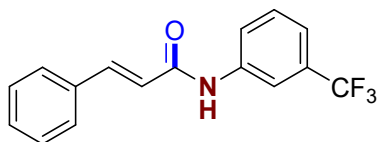

*N*-(3-(trifluoromethyl)phenyl)cinnamamide (**3-24**)

White solid (55.9 mg, 96% yield).  $^1\text{H NMR}$  (500 MHz, Methanol- $d_4$ )  $\delta$  8.12 (s, 1H), 7.82 (d,  $J = 7.0$  Hz, 1H), 7.67 (dd,  $J = 15.6, 5.8$  Hz, 1H), 7.58 (s, 2H), 7.52 – 7.44 (m, 1H), 7.37 (d,  $J = 8.2$  Hz, 4H), 6.80 – 6.72 (m, 1H).  $^{13}\text{C NMR}$  (126 MHz, Methanol- $d_4$ )  $\delta = 165.5, 142.1, 139.5, 134.7, 130.8$  (q,  $J = 31.9$  Hz), 129.8, 129.3, 128.6, 127.6, 124.1 (q,  $J = 271.5$  Hz), 122.8, 120.4, 120.0 (q,  $J = 3.8$  Hz), 116.1 (q,  $J = 3.9$  Hz).  $^{19}\text{F NMR}$  (471 MHz, Methanol- $d_4$ )  $\delta = -64.2$ .

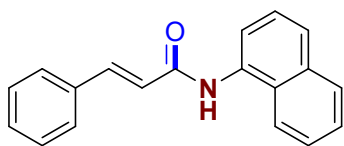

*N*-(naphthalen-1-yl)cinnamamide (**3-25**)

Grey solid (51.9 mg, 95% yield).  $^1\text{H NMR}$  (500 MHz, DMSO- $d_6$ )  $\delta = 10.16$  (s, 1H), 8.19 – 8.12 (m, 1H), 7.96 (dd,  $J = 7.4, 1.9$  Hz, 1H), 7.92 (d,  $J = 7.5$  Hz, 1H), 7.78 (d,  $J = 8.2$  Hz, 1H), 7.70 – 7.62 (m, 3H), 7.62 – 7.50 (m, 3H), 7.47 (t,  $J = 7.2$  Hz, 2H), 7.45 – 7.39 (m, 1H), 7.17 (d,  $J = 15.8$  Hz, 1H).  $^{13}\text{C NMR}$  (126 MHz, DMSO- $d_6$ )  $\delta = 164.8, 140.8, 135.4, 134.2, 134.0, 130.2, 129.5, 128.7, 128.2, 127.7, 126.5, 126.4, 126.1, 125.6, 123.0, 122.8, 121.4$ .

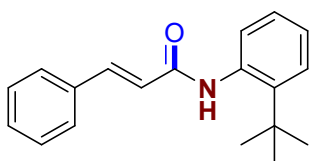

*N*-(2-(*tert*-butyl)phenyl)cinnamamide (**3-26**)

White solid (53.6 mg, 96% yield).  $^1\text{H NMR}$  (500 MHz,  $\text{CDCl}_3$ )  $\delta$  7.77 (d,  $J = 15.5$  Hz, 1H), 7.69 – 7.56 (m, 2H), 7.42 – 7.38 (m, 5H), 7.27 – 7.20 (m, 3H), 6.61 – 6.40 (m, 1H). 1.44 (s, 9H).  $^{13}\text{C NMR}$  (126 MHz,  $\text{CDCl}_3$ )  $\delta = 165.8, 142.8, 142.4, 135.2, 134.7, 134.7, 130.4, 128.8, 128.0, 126.9, 126.6, 126.3, 120.9, 34.7, 30.7$ .

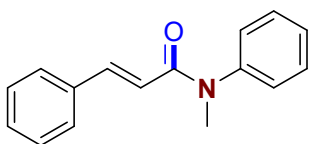

*N*-methyl-*N*-phenylcinnamamide (**3-27**)

Colorless oil (46.0 mg, 97% yield).  $^1\text{H NMR}$  (500 MHz,  $\text{CDCl}_3$ )  $\delta = 7.68$  (d,  $J = 15.5$  Hz, 1H), 7.44 (t,  $J = 7.7$  Hz, 2H), 7.39 – 7.34 (m, 1H), 7.32 (dd,  $J = 6.9, 3.1$  Hz, 2H), 7.28 (q,  $J = 3.4$  Hz, 3H), 7.25 – 7.22 (m, 2H), 6.37 (d,  $J = 15.5$  Hz, 1H), 3.41 (s, 3H).  $^{13}\text{C NMR}$  (126 MHz,  $\text{CDCl}_3$ )  $\delta = 166.2, 143.7, 141.7, 135.2, 129.6, 129.5, 128.7, 127.8, 127.6, 127.3, 118.8, 37.5$ .

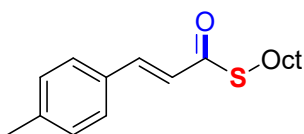

*S*-octyl (*E*)-3-(*p*-tolyl)prop-2-enethioate (**3-28**)

Pale yellow solid (44.1 mg, 76% yield).  $^1\text{H NMR}$  (500 MHz,  $\text{CDCl}_3$ )  $\delta = 7.58$  (d,  $J = 15.8$  Hz, 1H), 7.43 (d,  $J = 7.9$  Hz, 2H), 7.19 (d,  $J = 7.8$  Hz, 2H), 6.67 (d,  $J = 15.8$  Hz, 1H), 3.00 (t,  $J = 7.4$  Hz, 2H), 2.37 (s, 3H), 1.68 – 1.60 (m, 2H), 1.39 (q,  $J = 7.1$  Hz, 2H), 1.33 – 1.25 (m, 8H), 0.88 (t,  $J = 6.8$  Hz, 3H).  $^{13}\text{C NMR}$  (126 MHz,  $\text{CDCl}_3$ )  $\delta = 190.0, 140.9, 140.2, 131.5, 129.7, 128.3, 124.2, 31.8, 29.6, 29.1, 29.1, 28.9, 28.9, 22.6, 21.5, 14.0$ .

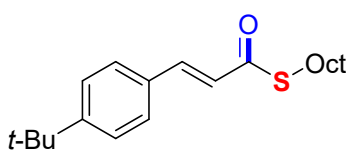

*S*-octyl (*E*)-3-(4-(*tert*-butyl)phenyl)prop-2-enethioate (**3-29**)

Pale yellow oil (47.1 mg, 71% yield).  $^1\text{H NMR}$  (500 MHz,  $\text{CDCl}_3$ )  $\delta$  = 7.60 (d,  $J$  = 15.8 Hz, 1H), 7.48 (d,  $J$  = 8.3 Hz, 2H), 7.41 (d,  $J$  = 8.2 Hz, 2H), 6.69 (d,  $J$  = 15.9 Hz, 1H), 3.00 (t,  $J$  = 7.3 Hz, 2H), 1.64 (p,  $J$  = 7.6 Hz, 2H), 1.40 (q,  $J$  = 7.2 Hz, 2H), 1.33 (s, 9H), 1.32 – 1.24 (m, 8H), 0.88 (t,  $J$  = 6.7 Hz, 3H).  $^{13}\text{C NMR}$  (126 MHz,  $\text{CDCl}_3$ )  $\delta$  = 190.0, 154.1, 140.1, 131.4, 128.2, 125.9, 124.4, 34.9, 31.8, 31.1, 29.6, 29.1, 29.1, 28.9, 28.9, 22.6, 14.1.

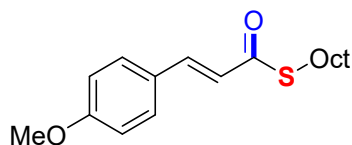

S-octyl (*E*)-3-(4-methoxyphenyl)prop-2-enoate (**3-30**)

Pale yellow oil (44.7 mg, 73% yield).  $^1\text{H NMR}$  (500 MHz,  $\text{CDCl}_3$ )  $\delta$  = 7.56 (d,  $J$  = 15.8 Hz, 1H), 7.49 (d,  $J$  = 8.4 Hz, 2H), 6.90 (d,  $J$  = 8.5 Hz, 2H), 6.59 (d,  $J$  = 15.8 Hz, 1H), 3.83 (s, 3H), 2.99 (t,  $J$  = 7.4 Hz, 2H), 1.63 (t,  $J$  = 7.4 Hz, 2H), 1.39 (t,  $J$  = 7.5 Hz, 2H), 1.33 – 1.24 (m, 8H), 0.88 (t,  $J$  = 6.7 Hz, 3H).  $^{13}\text{C NMR}$  (126 MHz,  $\text{CDCl}_3$ )  $\delta$  = 189.9, 161.6, 139.9, 130.0, 126.9, 122.9, 114.4, 55.4, 31.8, 29.6, 29.1, 29.1, 28.9, 28.9, 22.6, 14.0.

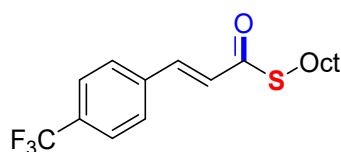

S-octyl (*E*)-3-(4-(trifluoromethyl)phenyl)prop-2-enoate (**3-31**)

Pale yellow solid (39.2 mg, 57% yield).  $^1\text{H NMR}$  (500 MHz,  $\text{CDCl}_3$ )  $\delta$  = 7.64 (s, 4H), 7.60 (d,  $J$  = 15.8 Hz, 1H), 6.76 (d,  $J$  = 15.9 Hz, 1H), 3.02 (t,  $J$  = 7.3 Hz, 2H), 1.64 (p,  $J$  = 7.4 Hz, 2H), 1.39 (q,  $J$  = 7.0 Hz, 2H), 1.33 – 1.24 (m, 8H), 0.88 (t,  $J$  = 6.8 Hz, 3H).  $^{13}\text{C NMR}$  (126 MHz,  $\text{CDCl}_3$ )  $\delta$  = 189.7, 138.1, 137.7, 131.9 (q,  $J$  = 32.7 Hz), 128.4, 127.4, 125.9 (q,  $J$  = 3.8 Hz), 123.8 (q,  $J$  = 272.4 Hz), 31.8, 29.5, 29.2, 29.1, 29.1, 28.9, 22.6, 14.1.  $^{19}\text{F NMR}$  (471 MHz,  $\text{CDCl}_3$ )  $\delta$  = -62.9.

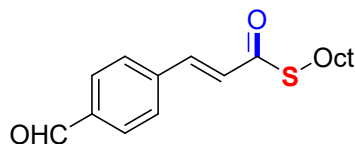

S-octyl (*E*)-3-(4-formylphenyl)prop-2-enoate (**3-32**)

Pale yellow solid (31.0 mg, 51% yield).  $^1\text{H NMR}$  (500 MHz,  $\text{CDCl}_3$ )  $\delta$  = 10.02 (s, 1H), 7.89 (d,  $J$  = 7.9 Hz, 2H), 7.68 (d,  $J$  = 8.0 Hz, 2H), 7.60 (d,  $J$  = 15.8 Hz, 1H), 6.79 (d,  $J$  = 15.9 Hz, 1H), 3.01 (t,  $J$  = 7.4 Hz, 2H), 1.63 (p,  $J$  = 7.4 Hz, 2H), 1.38 (q,  $J$  = 7.2 Hz, 2H), 1.27 (dd,  $J$  = 11.0, 5.2 Hz, 8H), 0.87 (t,  $J$  = 6.8 Hz, 3H).  $^{13}\text{C NMR}$  (126 MHz,  $\text{CDCl}_3$ )  $\delta$  = 191.3, 189.6, 139.9, 138.1, 137.2, 130.1, 128.7, 127.9, 31.7, 29.4, 29.1, 29.1, 29.0, 28.8, 22.6, 14.0.

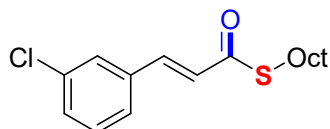

S-octyl (*E*)-3-(3-chlorophenyl)prop-2-enoate (**3-33**)

Pale yellow solid (42.2 mg, 68% yield).  $^1\text{H NMR}$  (500 MHz,  $\text{CDCl}_3$ )  $\delta$  = 7.56 – 7.47 (m, 2H), 7.40 (d,  $J$  = 7.5 Hz, 1H), 7.33 (dt,  $J$  = 15.4, 7.9 Hz, 2H), 6.69 (d,  $J$  = 16.0 Hz, 1H), 3.01 (t,  $J$  = 7.3 Hz, 2H), 1.66 – 1.60 (m, 2H), 1.41 – 1.37 (m, 2H), 1.29 – 1.27 (m, 8H), 0.88 (t,  $J$  = 6.7 Hz, 3H).  $^{13}\text{C NMR}$  (126 MHz,  $\text{CDCl}_3$ )  $\delta$  = 189.7, 138.3, 136.1, 135.0, 130.3, 130.1, 127.9, 126.5, 126.4, 31.8, 29.5, 29.1, 29.1, 29.1, 28.9, 22.6, 14.0.

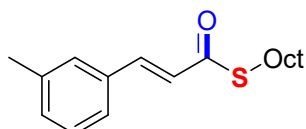

S-octyl (*E*)-3-(*m*-tolyl)prop-2-enethioate (**3-34**)

Pale yellow oil (44.7 mg, 77% yield).  $^1\text{H NMR}$  (500 MHz,  $\text{CDCl}_3$ )  $\delta$  = 7.58 (d,  $J$  = 15.8 Hz, 1H), 7.34 (d,  $J$  = 8.1 Hz, 2H), 7.30 – 7.25 (m, 1H), 7.20 (d,  $J$  = 7.5 Hz, 1H), 6.70 (d,  $J$  = 15.8 Hz, 1H), 3.00 (t,  $J$  = 7.4 Hz, 2H), 2.37 (s, 3H), 1.64 (p,  $J$  = 7.4 Hz, 2H), 1.40 (p,  $J$  = 7.0 Hz, 2H), 1.34 – 1.24 (m, 8H), 0.88 (t,  $J$  = 6.7 Hz, 3H).  $^{13}\text{C NMR}$  (126 MHz,  $\text{CDCl}_3$ )  $\delta$  = 190.0, 140.3, 138.6, 134.2, 131.3, 128.9, 128.8, 125.6, 125.0, 31.8, 29.6, 29.1, 29.1, 29.0, 28.9, 22.6, 21.3, 14.1.

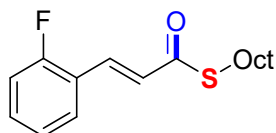

S-octyl (*E*)-3-(2-fluorophenyl)prop-2-enethioate (**3-35**)

Pale yellow oil (25.9 mg, 44% yield).  $^1\text{H NMR}$  (500 MHz,  $\text{CDCl}_3$ )  $\delta$  = 7.72 (d,  $J$  = 16.0 Hz, 1H), 7.54 (td,  $J$  = 7.6, 1.8 Hz, 1H), 7.36 (tdd,  $J$  = 7.5, 5.1, 1.7 Hz, 1H), 7.16 (t,  $J$  = 7.6 Hz, 1H), 7.10 (dd,  $J$  = 10.7, 8.3 Hz, 1H), 6.81 (d,  $J$  = 16.0 Hz, 1H), 3.01 (t,  $J$  = 7.4 Hz, 2H), 1.64 (p,  $J$  = 7.4 Hz, 2H), 1.40 (p,  $J$  = 7.0 Hz, 2H), 1.32 – 1.25 (m, 8H), 0.88 (t,  $J$  = 6.7 Hz, 3H).  $^{13}\text{C NMR}$  (126 MHz,  $\text{CDCl}_3$ )  $\delta$  = 190.1, 161.6 (d,  $J$  = 254.9 Hz), 132.8 (d,  $J$  = 2.5 Hz), 131.8 (d,  $J$  = 8.7 Hz), 129.3 (d,  $J$  = 2.8 Hz), 127.5 (d,  $J$  = 6.5 Hz), 124.5 (d,  $J$  = 3.6 Hz), 122.4 (d,  $J$  = 11.8 Hz), 116.2 (d,  $J$  = 21.9 Hz), 31.8, 29.5, 29.1, 29.1, 29.1, 28.9, 22.6, 14.1.  $^{19}\text{F NMR}$  (471 MHz,  $\text{CDCl}_3$ )  $\delta$  = -113.8.

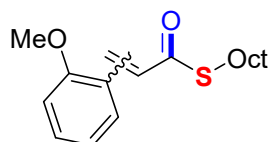

S-octyl (*E*)-3-(2-methoxyphenyl)prop-2-enethioate (**3-36**)

Pale yellow oil (52.6 mg, 86% yield). B/L form:  $^1\text{H NMR}$  (500 MHz,  $\text{CDCl}_3$ )  $\delta$  = 7.92 (d,  $J$  = 15.9 Hz, 1H), 7.51 (dd,  $J$  = 7.7, 1.7 Hz, 1H), 7.35 (m, 1.36H), 7.22 (dd,  $J$  = 7.4, 1.8 Hz, 0.34H), 6.97 (q,  $J$  = 8.0 Hz, 1.45H), 6.90 (t,  $J$  = 8.1 Hz, 1.4H), 6.82 (d,  $J$  = 16.0 Hz, 1H), 6.20 (s, 0.34 H), 5.60 (s, 0.34 H), 3.89 (s, 3H), 3.78 (s, 1H), 3.00 (t,  $J$  = 7.4 Hz, 2H), 2.92 (t,  $J$  = 7.4 Hz, 0.7H), 1.67 – 1.58 (m, 3H), 1.40 (q,  $J$  = 6.8 Hz, 3H), 1.33 – 1.25 (m, 11H), 0.90 – 0.86 (m, 4H).  $^{13}\text{C NMR}$  (126 MHz,  $\text{CDCl}_3$ )  $\delta$  = 193.4, 190.5, 158.7, 157.2, 146.6, 135.8, 131.6, 130.9, 130.2, 129.1, 126.6, 125.8, 123.2, 122.8, 120.7, 120.7, 111.2, 110.9, 55.5, 55.5, 31.8, 29.6, 29.5, 29.2, 29.1, 29.1, 28.9, 28.8, 22.6, 14.0.

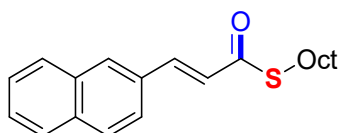

S-octyl (*E*)-3-((8*R*,9*S*,13*S*,14*S*)-13-methyl-17-oxo-7,8,9,11,12,13,14,15,16,17-decahydro-6*H*-cyclopenta[*a*]phenanthren-3-yl)prop-2-enethioate (**3-38**)

White solid (45.0 mg, 69% yield).  $^1\text{H NMR}$  (500 MHz,  $\text{CDCl}_3$ )  $\delta$  = 7.96 (s, 1H), 7.87 – 7.83 (m, 3H), 7.77 (d,  $J$  = 15.7 Hz, 1H), 7.67 (dd,  $J$  = 8.7, 1.8 Hz, 1H), 7.54 – 7.50 (m, 2H), 6.83 (d,  $J$  = 15.7 Hz, 1H), 3.03 (t,  $J$  = 7.4 Hz, 2H), 1.66 (dt,  $J$  = 15.0, 7.4 Hz, 2H), 1.42 (m, 2H), 1.33 – 1.25 (m, 8H), 0.89 (t,  $J$  = 6.7 Hz, 3H).  $^{13}\text{C NMR}$  (126 MHz,  $\text{CDCl}_3$ )  $\delta$  = 190.0, 140.2, 134.3, 133.3, 131.7, 130.5, 128.7, 128.6, 127.8, 127.3, 126.8, 125.4, 123.6, 31.8, 29.6, 29.1, 29.1, 29.0, 28.9, 22.6, 14.1.

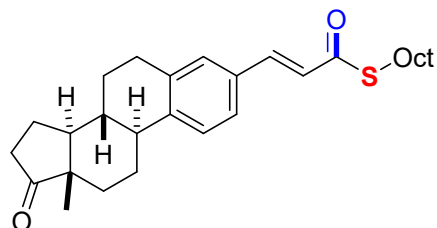

S-octyl (*E*)-3-((8*R*,9*S*,13*S*,14*S*)-13-methyl-17-oxo-7,8,9,11,12,13,14,15,16,17-decahydro-6*H*-cyclopenta[*a*]phenanthren-3-yl)prop-2-enethioate (**3-38**)

Yellow solid (66.0 mg, 73% yield).  $^1\text{H NMR}$  (500 MHz,  $\text{CDCl}_3$ )  $\delta$  7.54 (d,  $J = 15.8$  Hz, 1H), 7.31 (q,  $J = 8.2$  Hz, 2H), 7.26 (s, 1H), 6.67 (d,  $J = 15.8$  Hz, 1H), 2.99 (t,  $J = 7.2$  Hz, 2H), 2.92 (d,  $J = 4.7$  Hz, 2H), 2.50 (dd,  $J = 18.9, 8.7$  Hz, 1H), 2.42 (d,  $J = 14.3$  Hz, 1H), 2.31 (d,  $J = 9.4$  Hz, 1H), 2.21 – 2.10 (m, 1H), 2.09 – 2.01 (m, 2H), 1.97 (d,  $J = 11.4$  Hz, 1H), 1.68 – 1.57 (m, 5H), 1.56 – 1.45 (m, 3H), 1.43 – 1.39 (m, 2H), 1.28 (s, 8H), 0.91 (s, 3H), 0.87 (t,  $J = 6.5$  Hz, 3H).  $^{13}\text{C NMR}$  (126 MHz,  $\text{CDCl}_3$ )  $\delta = 190.0, 142.7, 140.1, 137.2, 131.8, 129.1, 126.0, 125.7, 124.5, 50.5, 47.9, 44.6, 37.9, 35.8, 31.8, 31.5, 29.6, 29.2, 29.1, 29.1, 28.9, 28.9, 26.3, 25.6, 22.6, 21.6, 14.0, 13.8$ . **HRMS (ESI)**: calcd for  $\text{C}_{29}\text{H}_{41}\text{O}_2\text{S}$   $[\text{M}+\text{H}]^+$  453.2822; found 453.2826.

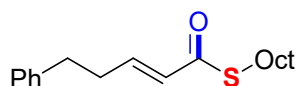

**S-octyl (E)-5-phenylpent-2-enethioate (3-39)**

Colorless oil (50.5 mg, 83% yield).  $^1\text{H NMR}$  (500 MHz,  $\text{CDCl}_3$ )  $\delta$  7.30 (t,  $J = 7.5$  Hz, 2H), 7.22 (d,  $J = 7.3$  Hz, 1H), 7.18 (d,  $J = 7.4$  Hz, 2H), 6.92 (dt,  $J = 15.4, 6.8$  Hz, 1H), 6.13 (d,  $J = 15.5$  Hz, 1H), 2.93 (t,  $J = 7.4$  Hz, 2H), 2.80 – 2.76 (m, 2H), 2.51 (q,  $J = 7.1$  Hz, 2H), 1.63 – 1.54 (m, 2H), 1.38 – 1.34 (m, 2H), 1.31 – 1.22 (m, 8H), 0.88 (t,  $J = 6.9$  Hz, 3H).  $^{13}\text{C NMR}$  (126 MHz,  $\text{CDCl}_3$ )  $\delta = 190.1, 143.8, 140.7, 129.2, 128.5, 128.3, 126.2, 34.3, 33.9, 31.8, 29.6, 29.1, 29.1, 28.9, 28.7, 22.6, 14.1$ .

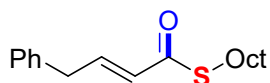

**S-octyl (E)-4-phenylbut-2-enethioate (3-40)**

Pale yellow oil (47.0 mg, 81% yield).  $^1\text{H NMR}$  (500 MHz,  $\text{CDCl}_3$ )  $\delta$  7.35 (t,  $J = 7.4$  Hz, 2H), 7.28 (d,  $J = 7.0$  Hz, 1H), 7.20 (d,  $J = 7.4$  Hz, 2H), 7.05 (dt,  $J = 15.2, 6.8$  Hz, 1H), 6.12 (d,  $J = 15.4$  Hz, 1H), 3.54 (d,  $J = 6.7$  Hz, 2H), 2.96 (t,  $J = 7.3$  Hz, 2H), 1.69 – 1.50 (m, 2H), 1.44 – 1.36 (m, 2H), 1.30 (d,  $J = 4.1$  Hz, 8H), 0.91 (t,  $J = 6.8$  Hz, 3H).  $^{13}\text{C NMR}$  (126 MHz,  $\text{CDCl}_3$ )  $\delta = 190.1, 143.1, 137.5, 129.6, 128.8, 128.7, 126.7, 38.3, 31.8, 29.5, 29.1, 29.1, 28.8, 28.7, 22.6, 14.1$ .

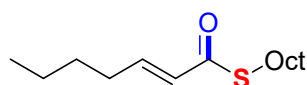

**S-octyl (E)-hept-2-enethioate (3-41)**

Pale yellow oil (41.0 mg, 80% yield).  $^1\text{H NMR}$  (500 MHz,  $\text{CDCl}_3$ )  $\delta$  6.88 (dt,  $J = 15.2, 7.0$  Hz, 1H), 6.09 (d,  $J = 15.5$  Hz, 1H), 2.91 (t,  $J = 7.4$  Hz, 2H), 2.17 (dt,  $J = 7.7, 4.0$  Hz, 2H), 1.64 – 1.54 (m, 2H), 1.48 – 1.40 (m, 2H), 1.39 – 1.30 (m, 4H), 1.30 – 1.21 (m, 8H), 0.90 (t,  $J = 7.3$  Hz, 3H), 0.86 (t,  $J = 7.0$  Hz, 3H).  $^{13}\text{C NMR}$  (126 MHz,  $\text{CDCl}_3$ )  $\delta = 190.2, 145.3, 128.7, 31.8, 31.8, 30.1, 29.6, 29.1, 29.1, 28.8, 28.6, 22.6, 22.2, 14.0, 13.8$ .

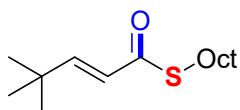

**S-octyl (E)-4,4-dimethylpent-2-enethioate (3-42)**

Yellow oil (47.6 mg, 93% yield).  $^1\text{H NMR}$  (500 MHz,  $\text{CDCl}_3$ )  $\delta$  6.87 (d,  $J = 15.8$  Hz, 1H), 6.00 (d,  $J = 15.7$  Hz, 1H), 2.92 (t,  $J = 7.3$  Hz, 2H), 1.62 – 1.53 (m, 2H), 1.39 – 1.32 (m, 2H), 1.31 – 1.22 (m, 8H), 1.07 (s, 9H), 0.87 (t,  $J = 6.9$  Hz, 3H).  $^{13}\text{C NMR}$  (126 MHz,  $\text{CDCl}_3$ )  $\delta = 190.7, 154.7, 124.1, 33.7, 31.8, 29.6, 29.1, 29.1, 28.9, 28.7, 28.6, 22.6, 14.0$ .

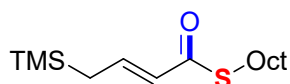

**S-octyl (E)-4-(trimethylsilyl)but-2-enethioate (3-43)**

Pale yellow oil (22.9 mg, 40% yield).  $^1\text{H NMR}$  (500 MHz,  $\text{CDCl}_3$ )  $\delta$  6.99 (dt,  $J = 15.3, 8.9$  Hz, 1H), 5.97 (d,  $J = 15.2$  Hz, 1H), 2.91 (t,  $J = 7.4$  Hz, 2H), 1.72 (d,  $J = 8.9$  Hz, 2H), 1.63 – 1.54 (m, 2H), 1.37 – 1.35 (m, 2H), 1.29 – 1.27 (m, 8H), 0.87 (t,  $J = 6.9$  Hz, 3H), 0.06 (s, 9H).  $^{13}\text{C NMR}$  (126 MHz,  $\text{CDCl}_3$ )  $\delta = 189.7, 144.2, 126.9, 31.8, 29.7, 29.1, 29.1, 28.9, 28.6, 25.0, 22.6, 14.1, -1.8$ .

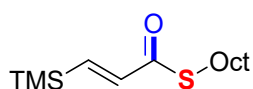

S-octyl (*E*)-3-(trimethylsilyl)prop-2-ene-1-thioate (**3-44**)

Dark yellow oil (39.2 mg, 72% yield).  $^1\text{H NMR}$  (500 MHz,  $\text{CDCl}_3$ )  $\delta$  = 7.11 (d,  $J$  = 18.8 Hz, 1H), 6.45 (d,  $J$  = 18.7 Hz, 1H), 2.94 (t,  $J$  = 7.3 Hz, 2H), 1.59 (p,  $J$  = 7.3 Hz, 2H), 1.36 (dd,  $J$  = 9.7, 5.6 Hz, 2H), 1.30 – 1.24 (m, 8H), 0.87 (t,  $J$  = 6.7 Hz, 3H), 0.14 (s, 9H).  $^{13}\text{C NMR}$  (126 MHz,  $\text{CDCl}_3$ )  $\delta$  = 190.4, 144.7, 140.4, 31.8, 29.5, 29.1, 29.1, 28.8, 28.8, 22.6, 14.0, -1.9.

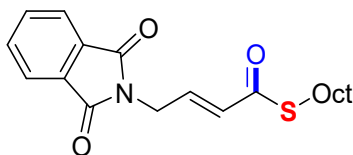

S-octyl (*E*)-4-(1,3-dioxoisindolin-2-yl)but-2-ene-1-thioate (**3-45**)

Pale yellow solid (48.1 mg, 67% yield).  $^1\text{H NMR}$  (500 MHz,  $\text{CDCl}_3$ )  $\delta$  = 7.87 (dd,  $J$  = 5.4, 3.0 Hz, 2H), 7.74 (dd,  $J$  = 5.5, 3.1 Hz, 2H), 6.81 (dt,  $J$  = 15.6, 5.4 Hz, 1H), 6.19 – 6.11 (m, 1H), 4.42 (dd,  $J$  = 5.5, 1.8 Hz, 2H), 2.91 (t,  $J$  = 7.3 Hz, 2H), 1.55 (p,  $J$  = 7.4 Hz, 2H), 1.33 (t,  $J$  = 7.6 Hz, 2H), 1.25 (dd,  $J$  = 11.9, 5.1 Hz, 8H), 0.85 (t,  $J$  = 6.8 Hz, 3H).  $^{13}\text{C NMR}$  (126 MHz,  $\text{CDCl}_3$ )  $\delta$  = 189.3, 167.5, 136.3, 134.2, 131.9, 130.0, 123.5, 38.1, 31.7, 29.4, 29.1, 29.0, 28.9, 28.8, 22.6, 14.0.

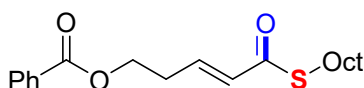

(*E*)-5-(octylthio)-5-oxopent-3-en-1-yl benzoate (**3-46**)

Colorless oil (62.6 mg, 90% yield).  $^1\text{H NMR}$  (500 MHz,  $\text{CDCl}_3$ )  $\delta$  = 8.02 (d,  $J$  = 7.7 Hz, 2H), 7.55 (t,  $J$  = 7.4 Hz, 1H), 7.43 (t,  $J$  = 7.7 Hz, 2H), 6.91 (dt,  $J$  = 15.6, 6.9 Hz, 1H), 6.24 (d,  $J$  = 15.5 Hz, 1H), 4.43 (t,  $J$  = 6.4 Hz, 2H), 2.93 (t,  $J$  = 7.4 Hz, 2H), 2.66 (qd,  $J$  = 6.6, 1.5 Hz, 2H), 1.58 (p,  $J$  = 7.4 Hz, 2H), 1.36 (dd,  $J$  = 9.6, 5.6 Hz, 2H), 1.27 (dd,  $J$  = 11.1, 6.0 Hz, 8H), 0.87 (t,  $J$  = 6.8 Hz, 3H).  $^{13}\text{C NMR}$  (126 MHz,  $\text{CDCl}_3$ )  $\delta$  = 189.8, 166.3, 139.6, 133.0, 130.7, 129.9, 129.6, 128.3, 62.6, 31.7, 31.4, 29.5, 29.1, 29.0, 28.8, 28.7, 22.6, 14.0.

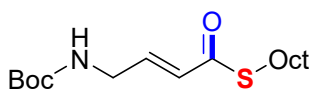

S-octyl (*E*)-4-((tert-butoxycarbonyl)amino)but-2-ene-1-thioate (**3-47**)

Yellow oil (29.6 mg, 45% yield).  $^1\text{H NMR}$  (500 MHz,  $\text{CDCl}_3$ )  $\delta$  = 6.81 (dt,  $J$  = 15.7, 5.0 Hz, 1H), 6.19 (dt,  $J$  = 15.4, 1.9 Hz, 1H), 4.70 (s, 1H), 3.91 (s, 2H), 2.93 (t,  $J$  = 7.3 Hz, 2H), 1.58 (p,  $J$  = 7.4 Hz, 2H), 1.45 (s, 9H), 1.35 (d,  $J$  = 7.5 Hz, 2H), 1.27 (q,  $J$  = 6.9 Hz, 8H), 0.87 (t,  $J$  = 6.7 Hz, 3H).  $^{13}\text{C NMR}$  (126 MHz,  $\text{CDCl}_3$ )  $\delta$  = 189.7, 155.5, 140.4, 128.3, 80.0, 41.3, 31.8, 29.5, 29.1, 29.0, 28.8, 28.8, 28.3, 22.6, 14.0. **HRMS (ESI)**: calcd for  $\text{C}_{17}\text{H}_{32}\text{NO}_3\text{S}$  [ $\text{M}+\text{H}$ ] $^+$  330.2097; found 330.2095.

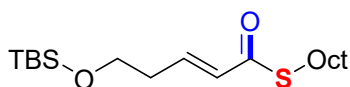

S-octyl (*E*)-5-((tert-butyl dimethylsilyl)oxy)pent-2-ene-1-thioate (**3-48**)

Yellow oil (45.8 mg, 64% yield).  $^1\text{H NMR}$  (500 MHz,  $\text{CDCl}_3$ )  $\delta$  = 6.88 (dt,  $J$  = 15.8, 7.1 Hz, 1H), 6.15 (dd,  $J$  = 15.8, 1.8 Hz, 1H), 3.72 (t,  $J$  = 6.4 Hz, 2H), 2.92 (t,  $J$  = 7.3 Hz, 2H), 2.39 (q,  $J$  = 6.6 Hz, 2H), 1.57 (q,  $J$  = 7.5 Hz, 2H), 1.36 (t,  $J$  = 7.6 Hz, 2H), 1.27 (dd,  $J$  = 12.0, 6.1 Hz, 8H), 0.87 (d,  $J$  = 6.7 Hz, 12H), 0.04 (s, 6H).  $^{13}\text{C NMR}$  (126 MHz,  $\text{CDCl}_3$ )  $\delta$  = 190.0, 141.8, 130.3, 61.4, 35.6, 31.8, 29.6, 29.1, 29.1, 28.8, 28.6, 25.8, 22.6, 18.2, 14.0, -5.4. **HRMS (ESI)**: calcd for  $\text{C}_{19}\text{H}_{39}\text{O}_2\text{Si}$  [ $\text{M}+\text{H}$ ] $^+$  359.2435; found 359.2431.

### 2.3 General Procedure for the Synthesis of Branch Products 4 and Characterization

An oven-dried 35 mL Schlenk tube with a Teflon screwcap was charged with PdCl<sub>2</sub> (1.8 mg, 0.01 mmol, 5 mol%), DPEphos (5.4 mg, 0.01 mmol, 5 mol%), the above-mentioned mixture was degassed and refilled with CO for 3 times under the rubber plug. Then, a solution of **1** (0.2 mmol), **2** (0.24 mmol) and Et<sub>3</sub>SiH (100 μL, 0.6 mmol, 3.0 eq.) in 4 mL of dry CH<sub>3</sub>CN were added to the mixture by syringe. And then, quickly replace to a Teflon screwcap and tighten it in a well-ventilated fume hood. Finally, the mixture was stirred at 40 °C for 24 h. After completion of the reaction, the crude reaction mixture was concentrated in vacuo and the residue was dissolved in CDCl<sub>3</sub>, then the B/L ratio of the product is determined by <sup>1</sup>H NMR. Finally, these CDCl<sub>3</sub> fractions were collected and concentrated again, and the residue was purified by silica gel flash column chromatography (hexane/EtOAc) to give products **4**.

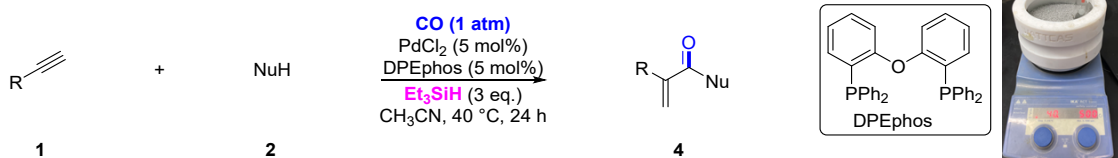

#### Characterization of Products 4<sup>2</sup>

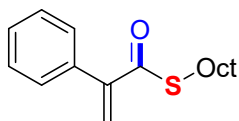

##### S-octyl 2-phenylprop-2-enethioate (**4-1**)

Clear yellow oil (39.2 mg, 71% yield). <sup>1</sup>H NMR (500 MHz, CDCl<sub>3</sub>) δ = 7.42 – 7.38 (m, 2H), 7.36 (dt, *J* = 4.4, 2.8 Hz, 3H), 6.18 (s, 1H), 5.77 (s, 1H), 2.97 (t, *J* = 7.4 Hz, 2H), 1.62 (p, *J* = 7.4 Hz, 2H), 1.43 – 1.36 (m, 2H), 1.31 – 1.24 (m, 8H), 0.88 (t, *J* = 6.9 Hz, 3H). <sup>13</sup>C NMR (126 MHz, CDCl<sub>3</sub>) δ = 193.8, 148.6, 136.2, 128.5, 128.3, 128.2, 122.4, 31.8, 29.6, 29.3, 29.1, 29.1, 28.9, 22.6, 14.0.

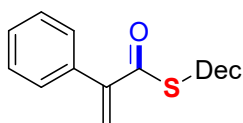

##### S-decyl 2-phenylprop-2-enethioate (**4-2**)

Dark yellow oil (41.3 mg, 68% yield). <sup>1</sup>H NMR (500 MHz, CDCl<sub>3</sub>) δ = 7.38 (ddd, *J* = 15.4, 7.3, 3.5 Hz, 5H), 6.18 (s, 1H), 5.77 (s, 1H), 2.96 (t, *J* = 7.4 Hz, 2H), 1.62 (q, *J* = 7.3 Hz, 2H), 1.38 (t, *J* = 7.8 Hz, 2H), 1.27 (d, *J* = 6.4 Hz, 12H), 0.88 (t, *J* = 6.9 Hz, 3H). <sup>13</sup>C NMR (126 MHz, CDCl<sub>3</sub>) δ = 193.8, 148.5, 136.2, 128.5, 128.3, 128.2, 122.4, 31.9, 29.6, 29.5, 29.5, 29.3, 29.3, 29.1, 28.9, 22.6, 14.1.

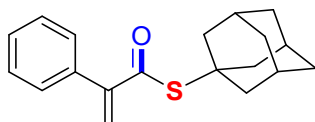

##### S-(adamantan-1-yl) 2-phenylprop-2-enethioate (**4-3**)

Yellow oil (32.2 mg, 54% yield). <sup>1</sup>H NMR (500 MHz, CDCl<sub>3</sub>) δ = 7.40 – 7.36 (m, 2H), 7.36 – 7.32 (m, 3H), 6.07 (s, 1H), 5.71 (s, 1H), 2.20 (d, *J* = 3.0 Hz, 6H), 2.09 – 2.05 (m, 3H), 1.78 (dq, *J* = 12.5, 2.2 Hz, 3H), 1.74 – 1.70 (m, 3H). <sup>13</sup>C NMR (126 MHz, CDCl<sub>3</sub>) δ = 194.4, 149.3, 136.4, 128.4, 128.2, 128.2, 121.6, 51.4, 41.7, 36.3, 29.8.



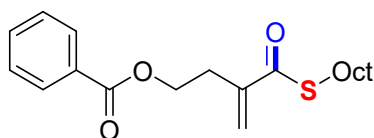

3-((octylthio)carbonyl)but-3-en-1-yl benzoate (**4-4**)

Clear yellow oil (41.1 mg, 59% yield).  $^1\text{H NMR}$  (500 MHz,  $\text{CDCl}_3$ )  $\delta$  = 8.06 – 7.93 (m, 2H), 7.59 – 7.50 (m, 1H), 7.43 (t,  $J$  = 7.7 Hz, 2H), 6.23 (s, 1H), 5.73 (s, 1H), 4.44 (t,  $J$  = 6.5 Hz, 2H), 2.92 (t,  $J$  = 7.4 Hz, 2H), 2.85 – 2.79 (m, 2H), 1.61 – 1.54 (m, 2H), 1.37 (t,  $J$  = 7.5 Hz, 2H), 1.32 – 1.24 (m, 8H), 0.88 (t,  $J$  = 6.8 Hz, 3H).  $^{13}\text{C NMR}$  (126 MHz,  $\text{CDCl}_3$ )  $\delta$  = 193.3, 166.4, 144.6, 132.9, 130.2, 129.6, 128.3, 124.4, 63.1, 31.8, 31.3, 29.4, 29.1, 29.1, 29.0, 28.9, 22.6, 14.1.

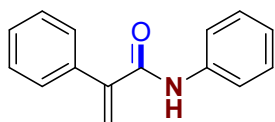

*N*,2-diphenylacrylamide (**4-5**)

Colorless solid (27.2 mg, 61% yield).  $^1\text{H NMR}$  (500 MHz,  $\text{CDCl}_3$ )  $\delta$  = 7.52 (d,  $J$  = 8.0 Hz, 2H), 7.44 (tt,  $J$  = 8.3, 3.9 Hz, 6H), 7.32 (t,  $J$  = 7.8 Hz, 2H), 7.12 (t,  $J$  = 7.4 Hz, 1H), 6.29 (s, 1H), 5.73 (s, 1H).  $^{13}\text{C NMR}$  (126 MHz,  $\text{CDCl}_3$ )  $\delta$  = 165.2, 145.1, 137.6, 136.7, 129.0, 128.9, 128.8, 128.3, 124.6, 123.3, 119.9.

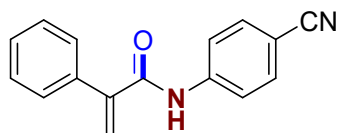

*N*-(4-cyanophenyl)-2-phenylacrylamide (**4-6**)

Yellow solid (25.3 mg, 51% yield).  $^1\text{H NMR}$  (500 MHz,  $\text{CDCl}_3$ )  $\delta$  = 7.65 (d,  $J$  = 8.8 Hz, 2H), 7.60 (d,  $J$  = 8.9 Hz, 2H), 7.55 (d,  $J$  = 4.2 Hz, 1H), 7.44 (dtt,  $J$  = 6.9, 4.7, 2.0 Hz, 5H), 6.35 (s, 1H), 5.79 (s, 1H).  $^{13}\text{C NMR}$  (126 MHz,  $\text{CDCl}_3$ )  $\delta$  = 165.4, 144.5, 141.7, 136.1, 133.2, 129.1, 128.2, 124.5, 119.7, 118.7, 112.0, 107.5.

## 2.4 General Procedure for the Synthesis of Products 5 and Characterization

An oven-dried 10 mL Schlenk tube was charged with 1,2-diphenylethyne (17.8 mg, 0.1 mmol),  $\text{PdCl}_2$  (1.8 mg, 0.01 mmol, 10 mol%), BINAP (6.2 mg, 0.01 mmol, 10 mol%), the above-mentioned mixture was degassed and refilled with CO for 3 times. Then, a solution of **2** (0.12 mmol, 1.2 eq.) and  $\text{Et}_3\text{SiH}$  (50  $\mu\text{L}$ , 0.3 mmol, 3.0 eq.) in 2 mL of dry  $\text{CH}_3\text{CN}$  were added to the mixture by syringe. Finally, the mixture was stirred at 80 °C for 24 h under CO balloon. After completion of the reaction, the crude reaction mixture was concentrated in vacuo and the residue was purified by silica gel flash column chromatography (hexane/EtOAc) to give products **5**.

The authors have tried termination reagents such as aliphatic amine, alcohols and phenols and none of the target products were observed.

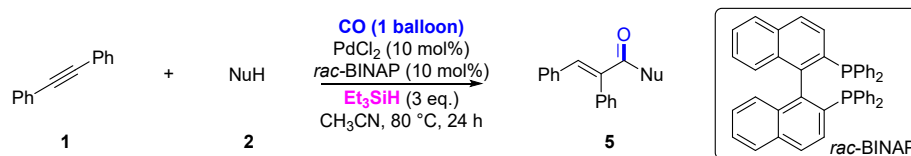

Unsuccessful nucleophilic reagent:

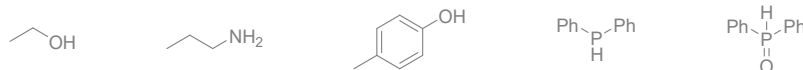

## Characterization of Products 5<sup>2</sup>

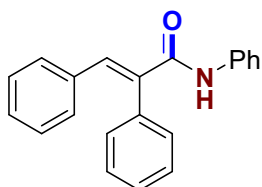

### (*E*)-*N*,2,3-triphenylacrylamide (**5-1**)

White solid (22.2 mg, 74% yield). <sup>1</sup>H NMR (500 MHz, CDCl<sub>3</sub>) δ = 7.98 (s, 1H), 7.51 (d, *J* = 7.0 Hz, 3H), 7.45 (d, *J* = 7.9 Hz, 2H), 7.39 – 7.33 (m, 2H), 7.30 (t, *J* = 7.8 Hz, 2H), 7.20 (t, *J* = 5.0 Hz, 2H), 7.16 (t, *J* = 7.5 Hz, 2H), 7.09 (t, *J* = 7.4 Hz, 1H), 7.03 (d, *J* = 7.5 Hz, 2H). <sup>13</sup>C NMR (126 MHz, CDCl<sub>3</sub>) δ = 165.0, 138.2, 137.8, 135.8, 134.8, 134.6, 130.5, 130.0, 129.9, 128.9, 128.9, 128.8, 128.2, 124.4, 119.9.

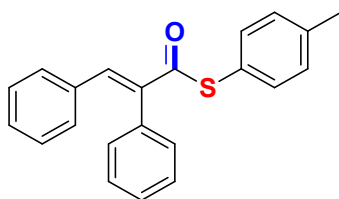

### *S*-(*p*-tolyl) (*E*)-2,3-diphenylprop-2-enethioate (**5-2**)

White solid (29.7 mg, 90% yield). <sup>1</sup>H NMR (500 MHz, CDCl<sub>3</sub>) δ = 7.74 (s, 1H), 7.49 – 7.45 (m, 3H), 7.39 (dd, *J* = 6.8, 2.7 Hz, 2H), 7.31 (d, *J* = 8.0 Hz, 2H), 7.25 – 7.21 (m, 3H), 7.17 (t, *J* = 7.6 Hz, 2H), 7.07 (d, *J* = 7.5 Hz, 2H), 2.38 (s, 3H). <sup>13</sup>C NMR (126 MHz, CDCl<sub>3</sub>) δ = 192.1, 139.4, 138.6, 136.8, 135.1, 134.6, 134.2, 131.1, 130.8, 129.9, 129.4, 128.9, 128.8, 128.3, 125.2, 21.3.

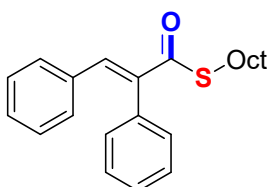

### *S*-octyl (*E*)-2,3-diphenylprop-2-enethioate (**5-3**)

Yellow oil (32.0 mg, 91% yield). <sup>1</sup>H NMR (500 MHz, CDCl<sub>3</sub>) δ 7.70 (s, 1H), 7.46 – 7.42 (m, 3H), 7.31 – 7.29 (m, 2H), 7.21 (t, *J* = 7.3 Hz, 1H), 7.16 (t, *J* = 7.5 Hz, 2H), 7.05 (d, *J* = 7.6 Hz, 2H), 2.93 (t, *J* = 7.4 Hz, 2H), 1.63 – 1.53 (m, 2H), 1.38 – 1.34 (m, 2H), 1.27 (s, 8H), 0.89 (t, *J* = 6.9 Hz, 3H). <sup>13</sup>C NMR (126 MHz, CDCl<sub>3</sub>) δ = 193.7, 139.1, 135.9, 135.5, 134.3, 131.0, 130.6, 129.2, 128.8, 128.5, 128.3, 31.8, 30.0, 29.3, 29.1, 29.1, 29.0, 22.6, 14.1.

## 2.5 Screening of Conditions for the Asymmetric Hydroamidation of 2-(*tert*-butyl)-*N*-(2-(phenylethynyl)phenyl)aniline

**General procedure:** An oven-dried 10 mL Schlenk tube was charged with [Pd], L, additive and **6-1** (16.3 mg, 0.05 mmol), the above-mentioned mixture was degassed and refilled with CO for 3 times. Then, a solution of Et<sub>3</sub>SiH in 4 mL of dry CH<sub>3</sub>CN was added to the mixture by syringe. Finally, the mixture was stirred at 60-80 °C for 24 h under CO balloon. After completion of the reaction, the *ee* and *Z/E* ratio of the product is determined by HPLC. And then the crude reaction mixture was concentrated in vacuo, and the residue was dissolved in CDCl<sub>3</sub>, the yield of the product **7-1** is determined by <sup>1</sup>H NMR with 1,3,5-trimethoxybenzene (8.3 mg, 0.05 mmol) as the internal standard.

**Table S1.** Screening of solvents and additives

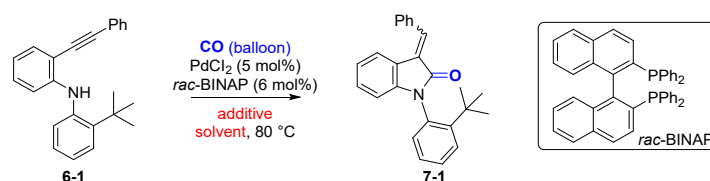

| entry     | additive                            | solvent     | yield      |
|-----------|-------------------------------------|-------------|------------|
| 1         | PTSA•H <sub>2</sub> O (20 mol%)     | MeCN        | n.r.       |
| 2         | PTSA•H <sub>2</sub> O (20 mol%)     | dioxane     | n.r.       |
| 3         | PTSA•H <sub>2</sub> O (20 mol%)     | toluene     | trace      |
| 4         | PTSA•H <sub>2</sub> O (20 mol%)     | anisole     | trace      |
| 5         | (PhO) <sub>2</sub> P(O)OH (20 mol%) | anisole     | trace      |
| 6         | HCl (20 mol%)                       | anisole     | n.r.       |
| 7         | AcOH (20 mol%)                      | anisole     | n.r.       |
| 8         | PhCOOH (20 mol%)                    | anisole     | n.r.       |
| 9         | Et <sub>3</sub> SiH (3.0 eq.)       | anisole     | trace      |
| <b>10</b> | <b>Et<sub>3</sub>SiH (3.0 eq.)</b>  | <b>MeCN</b> | <b>64%</b> |

**Table S2.** Screening of Palladium sources and hydrosilanes

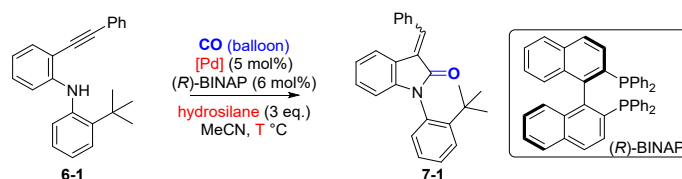

| entry    | [Pd]                                                  | hydrosilane                   | T (°C)    | yield           | ee         |
|----------|-------------------------------------------------------|-------------------------------|-----------|-----------------|------------|
| 1        | PdCl <sub>2</sub>                                     | <i>i</i> -Pr <sub>3</sub> SiH | 80        | trace           |            |
| 2        | PdCl <sub>2</sub>                                     | PhSiH <sub>3</sub>            | 80        | moderate        | 47%        |
| 3        | Pd(TFA) <sub>2</sub>                                  | Et <sub>3</sub> SiH           | 80        | high            | 44%        |
| 4        | PdCl <sub>2</sub>                                     | PhSiH <sub>3</sub>            | 60        | low             | 52%        |
| <b>5</b> | <b>PdCl<sub>2</sub></b>                               | <b>Et<sub>3</sub>SiH</b>      | <b>60</b> | <b>moderate</b> | <b>56%</b> |
| 6        | PdI <sub>2</sub>                                      | Et <sub>3</sub> SiH           | 60        | trace           | /          |
| 7        | Pd(MeCN) <sub>4</sub> (BF <sub>4</sub> ) <sub>2</sub> | Et <sub>3</sub> SiH           | 60        | trace           | /          |
| 8        | Pd(OAc) <sub>2</sub>                                  | Et <sub>3</sub> SiH           | 60        | n.r.            | /          |
| 9        | Pd(acac) <sub>2</sub>                                 | Et <sub>3</sub> SiH           | 60        | n.r.            | /          |
| 10       | [Pd(C <sub>3</sub> H <sub>5</sub> )Cl] <sub>2</sub>   | Et <sub>3</sub> SiH           | 60        | n.r.            | /          |

|    |                                       |                     |    |          |     |
|----|---------------------------------------|---------------------|----|----------|-----|
| 11 | Pd(MeCN) <sub>2</sub> Cl <sub>2</sub> | Et <sub>3</sub> SiH | 60 | moderate | 51% |
| 12 | Pd(PhCN) <sub>2</sub> Cl <sub>2</sub> | Et <sub>3</sub> SiH | 60 | moderate | 50% |
| 13 | Pd(COD) <sub>2</sub> Cl <sub>2</sub>  | Et <sub>3</sub> SiH | 60 | moderate | 47% |

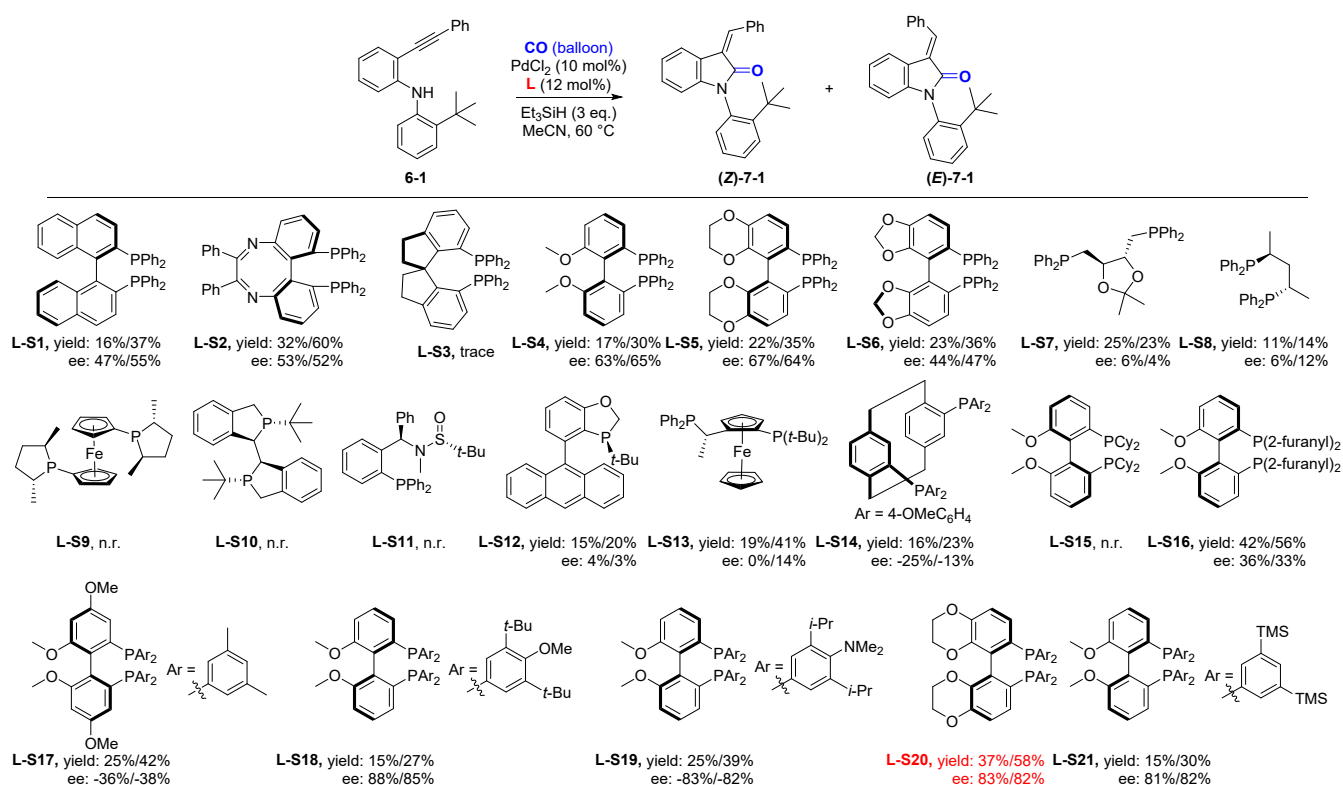

Scheme S1. Screening of ligands.

Table S3. Screening of additives and equivalents

Reaction scheme showing the synthesis of (Z)-7-1 and (E)-7-1 from 6-1 using CO (balloon), [Pd] (x mol%), L-S20 (x mol%), Et<sub>3</sub>SiH (x eq.), additive (x mol%), MeCN, 60 °C.

Reaction conditions: CO (balloon), [Pd] (x mol%), L-S20 (x mol%), Et<sub>3</sub>SiH (x eq.), additive (x mol%), MeCN, 60 °C.

| entry | [Pd] (x mol%)                   | L-S20 (x mol%) | Et <sub>3</sub> SiH (x eq.) | additive (x mol%)                                                   | yield Z/E (%) | ee Z/E (%)   |
|-------|---------------------------------|----------------|-----------------------------|---------------------------------------------------------------------|---------------|--------------|
| 1     | PdCl <sub>2</sub> (10)          | 12             | 3                           | (PhO) <sub>2</sub> P(O)OH (20)                                      | 24/74         | 88/85        |
| 2     | PdCl <sub>2</sub> (10)          | 12             | 1                           | (PhO) <sub>2</sub> P(O)OH (20)                                      | 18/59         | 91/88        |
| 3     | PdCl <sub>2</sub> (10)          | 12             | 1                           | (PhO) <sub>2</sub> P(O)OH (60)                                      | 16/62         | 92/91        |
| 4     | PdCl <sub>2</sub> (10)          | 12             | 1.25                        | (PhO) <sub>2</sub> P(O)OH (10)                                      | 10/46         | 73/74        |
| 5     | PdCl <sub>2</sub> (10)          | 12             | 1.25                        | (PhO) <sub>2</sub> P(O)OH (40)                                      | 20/71         | 91/90        |
| 6     | PdCl <sub>2</sub> (5)           | 6              | 1.25                        | (PhO) <sub>2</sub> P(O)OH (40)                                      | 16/43         | 93/92        |
| 7     | PdCl <sub>2</sub> (10)          | 10             | 1.25                        | (PhO) <sub>2</sub> P(O)OH (40)                                      | 22/70         | 91/90        |
| 8     | PdCl <sub>2</sub> (10)          | 10             | 1.25                        | benzoic acid (40)                                                   | 36/60         | 90/89        |
| 9     | PdCl <sub>2</sub> (10)          | 10             | 1.25                        | (R)-(-)-1,1'-binaphthalene-2,2'-diyl hydrogen phosphate (40)        | 23/71         | 92/91        |
| 10    | Pd(dba) <sub>2</sub> (10)       | 10             | 1.25                        | (R)-(-)-1,1'-binaphthalene-2,2'-diyl hydrogen phosphate (40)        | 13/21         | 96/93        |
| 11    | <b>Pd(TFA)<sub>2</sub> (10)</b> | <b>10</b>      | <b>1.25</b>                 | <b>(R)-(-)-1,1'-binaphthalene-2,2'-diyl hydrogen phosphate (40)</b> | <b>18/79</b>  | <b>91/91</b> |

## 2.6 General Procedure for the Asymmetric Synthesis of Products 7 and Characterization

An oven-dried 10 mL Schlenk tube was charged with Pd(TFA)<sub>2</sub> (3.3 mg, 0.01 mmol, 10 mol%), (*R*)-TMS-SYNPHOS (12.2 mg, 0.01 mmol, 10 mol%), (*R*)-(-)-1,1'-binaphthalene-2,2'-diyl hydrogen phosphate (14 mg, 0.04 mmol, 40 mol%) and **6** (0.1 mmol), the above-mentioned mixture was degassed and refilled with CO for 3 times. Then, a solution of Et<sub>3</sub>SiH (20 μL, 0.125 mmol, 1.25 eq.) in 4 mL of dry CH<sub>3</sub>CN was added to the mixture by syringe. Finally, the mixture was stirred at 60 °C for 24 h under CO balloon. After completion of the reaction, the *ee* and *Z/E* ratio of the product is determined by HPLC. And then, the crude reaction mixture was concentrated in vacuo, the residue was purified by silica gel flash column chromatography (hexane/EtOAc) to give products **7**. The authors tried groups with less spatial site resistance than *tert*-butyl, such as isopropyl, and only lower enantioselectivity was observed. We found by calculation that this may be due to the lower rotational energy barrier of the product.

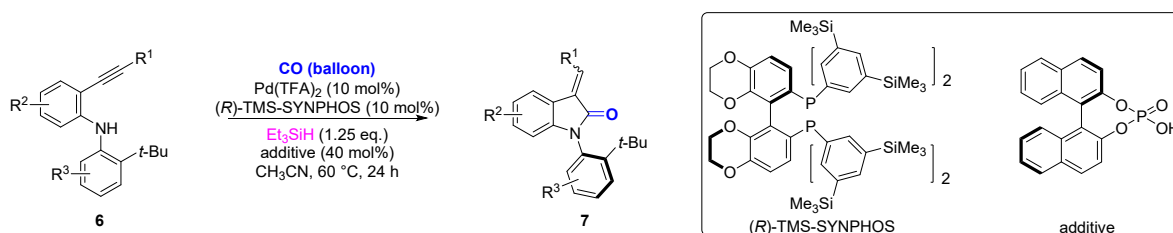

### Unsuccessful examples:

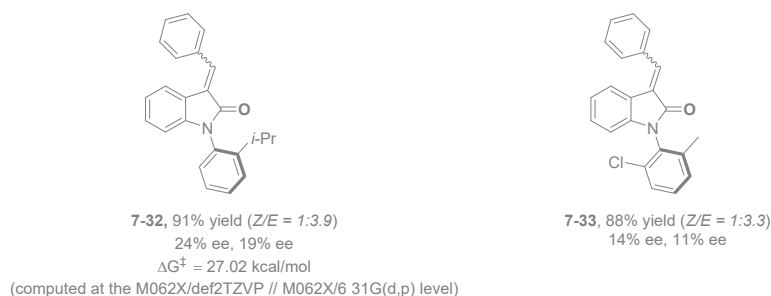

## Characterization of Products 7

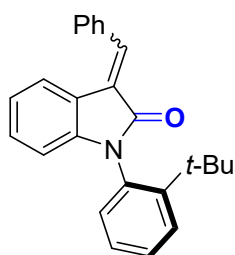

### 3-benzylidene-1-(2-(*tert*-butyl)phenyl)indolin-2-one (**7-1**)

Yellow solid (33.9 mg, 96% yield, *Z/E*  $\approx$  1:4, 91% ee, 91% ee). (*Z*) Form:  $[\alpha]_D^{25} = +38.8$  ( $c = 0.17$  in MeOH),  $^1\text{H NMR}$  (500 MHz,  $\text{CDCl}_3$ )  $\delta$  8.36 (d,  $J = 7.9$  Hz, 2H), 7.68 – 7.58 (m, 3H), 7.45 – 7.39 (m, 4H), 7.33 (td,  $J = 7.6, 1.2$  Hz, 1H), 7.19 (t,  $J = 7.4$  Hz, 1H), 7.11 – 7.01 (m, 2H), 6.37 (d,  $J = 7.7$  Hz, 1H), 1.32 (s, 9H);  $^{13}\text{C NMR}$  (126 MHz,  $\text{CDCl}_3$ )  $\delta$  167.2, 149.6, 144.6, 137.7, 133.8, 133.2, 132.2, 131.3, 130.6, 129.3, 129.0, 128.9, 128.3, 127.8, 126.1, 124.6, 122.0, 118.9, 110.5, 35.8, 31.7. (*E*) Form:  $[\alpha]_D^{25} = +14.3$  ( $c = 0.07$  in MeOH),  $^1\text{H NMR}$  (500 MHz,  $\text{CDCl}_3$ )  $\delta$  7.95 (s, 1H), 7.75 – 7.70 (m, 3H), 7.67 (dd,  $J = 8.0, 0.8$  Hz, 1H), 7.50 (t,  $J = 7.3$  Hz, 2H), 7.47 – 7.42 (m, 2H), 7.34 (td,  $J = 7.6, 1.1$  Hz, 1H), 7.16 (t,  $J = 7.6$  Hz, 1H), 7.06 (dd,  $J = 7.7, 0.9$  Hz, 1H), 6.90 (t,  $J = 7.6$  Hz, 1H), 6.36 (d,  $J = 7.8$  Hz, 1H), 1.35 (s, 9H);  $^{13}\text{C NMR}$  (126 MHz,  $\text{CDCl}_3$ )  $\delta$  169.5, 149.6, 146.5, 137.9, 135.0, 133.2, 131.2, 129.8, 129.7, 129.4, 129.0, 128.7, 127.9, 127.3, 122.7, 121.9, 121.2, 110.9, 35.7, 31.7.

**HRMS (ESI):** calcd for  $\text{C}_{25}\text{H}_{24}\text{NO}$   $[\text{M}+\text{H}]^+$  354.1852; found 354.1854.

The ee was determined by Daicel Chiralcel AD-H (0.46 cm x 25 cm), hexane/isopropanol = 90/10, 1.0 mL/min,  $\lambda = 254$  nm,  $t_R$  (minor) = 5.224/8.694 min,  $t_R$  (major) = 5.559/11.282 min.

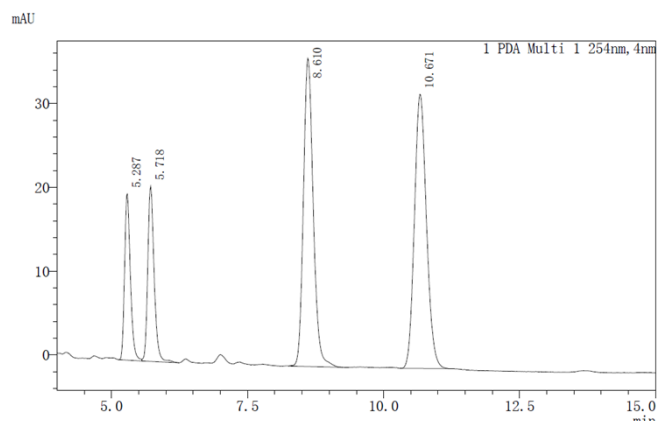

| PDA Ch1 254nm |           |              |                |             |                  |
|---------------|-----------|--------------|----------------|-------------|------------------|
| NO.           | Ret. Time | Height (uAU) | Area (uAU*min) | Rel. Area % | Resolution (USP) |
| 1             | 5.287     | 19841        | 147014         | 11.470      | --               |
| 2             | 5.718     | 20902        | 169341         | 13.212      | 1.987            |
| 3             | 8.610     | 36786        | 461636         | 36.016      | 10.341           |
| 4             | 10.671    | 32700        | 503765         | 39.303      | 5.505            |

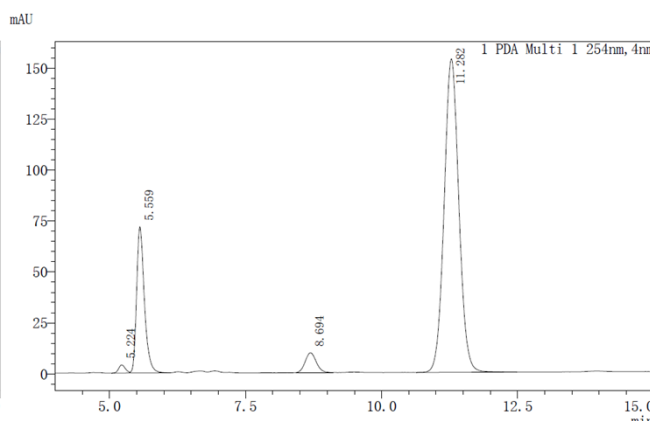

| PDA Ch1 254nm |           |              |                |             |                  |
|---------------|-----------|--------------|----------------|-------------|------------------|
| NO.           | Ret. Time | Height (uAU) | Area (uAU*min) | Rel. Area % | Resolution (USP) |
| 1             | 5.224     | 3992         | 34374          | 0.911       | --               |
| 2             | 5.559     | 71664        | 711620         | 18.856      | 1.310            |
| 3             | 8.694     | 9698         | 136250         | 3.610       | 9.660            |
| 4             | 11.282    | 153733       | 2891645        | 76.622      | 5.884            |

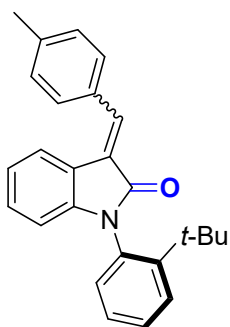

1-(2-(*tert*-butyl)phenyl)-3-(4-methylbenzylidene)indolin-2-one (**7-2**)

Yellow oil (34.1 mg, 93% yield, *Z/E*  $\approx$  1:6.3, 96% ee, 96% ee). (*Z*)&(*E*) Form:  $[\alpha]_D^{25} = +10.9$  ( $c = 0.11$  in MeOH),  $^1\text{H NMR}$  (500 MHz,  $\text{CDCl}_3$ )  $\delta$  8.31 (d,  $J = 8.0$  Hz, 0.3H), 7.92 (s, 1H), 7.79 (d,  $J = 7.7$  Hz, 1H), 7.69 – 7.58 (m, .3.64H), 7.44 (t,  $J = 7.5$  Hz, 1.22H), 7.34 (t,  $J = 7.9$  Hz, 1.24H), 7.31 (d,  $J = 7.8$  Hz, 2H), 7.24 (d,  $J = 8.0$  Hz, 0.33H), 7.15 (t,  $J = 7.8$  Hz, 1.27H), 7.06 (d,  $J = 7.6$  Hz, 1.46H), 6.91 (t,  $J = 7.6$  Hz, 1H), 6.35 (d,  $J = 7.8$  Hz, 1.18H). 2.45 (s, 3H), 2.40 (s, 0.52H), 1.35 (s, 9H), 1.32 (s, 1.63H).  $^{13}\text{C NMR}$  (126 MHz,  $\text{CDCl}_3$ )  $\delta$  169.6, 167.3, 149.7, 149.6, 146.4, 144.4, 141.3, 140.1, 138.2, 137.9, 133.3, 133.3, 132.5, 132.1, 131.3, 131.3, 129.6, 129.5, 129.4, 129.3, 129.2, 129.1, 129.0, 128.9, 128.5, 127.9, 127.8, 126.5, 125.1, 124.8, 122.6, 121.8, 121.4, 118.7, 110.8, 110.4, 35.8, 35.7, 31.8, 31.7, 21.7, 21.6.

**HRMS (ESI)**: calcd for  $\text{C}_{26}\text{H}_{26}\text{NO}$   $[\text{M}+\text{H}]^+$  368.2009; found 368.2009.

The ee was determined by Daicel Chiralcel AD-H (0.46 cm x 25 cm), hexane/isopropanol = 99/1, 0.8 mL/min,  $\lambda = 254$  nm,  $t_R$  (minor) = 14.027/38.082 min,  $t_R$  (major) = 25.240/46.103 min.

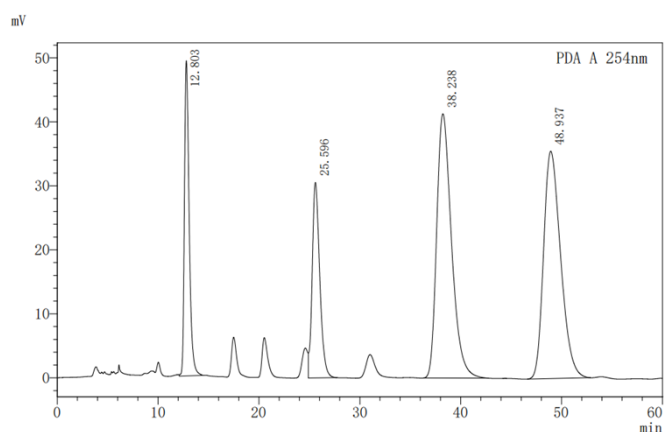

| PDA A 254nm |           |              |                |             |                  |
|-------------|-----------|--------------|----------------|-------------|------------------|
| NO.         | Ret. Time | Height (uAU) | Area (uAU*min) | Rel. Area % | Resolution (USP) |
| 1           | 12.803    | 49272        | 1601819        | 13.834      | --               |
| 2           | 25.596    | 30551        | 1587502        | 13.711      | 11.815           |
| 3           | 38.238    | 41306        | 4218638        | 36.435      | 6.352            |
| 4           | 48.937    | 35542        | 4170707        | 36.021      | 3.726            |

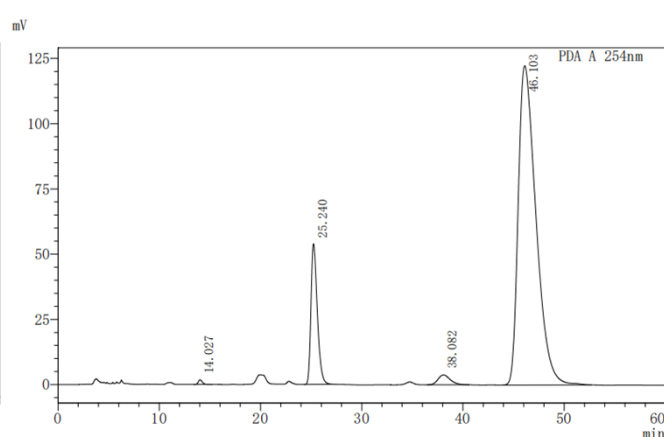

| PDA A 254nm |           |              |                |             |                  |
|-------------|-----------|--------------|----------------|-------------|------------------|
| NO.         | Ret. Time | Height (uAU) | Area (uAU*min) | Rel. Area % | Resolution (USP) |
| 1           | 14.027    | 1800         | 47869          | 0.272       | --               |
| 2           | 25.240    | 53926        | 2364487        | 13.412      | 12.219           |
| 3           | 38.082    | 3805         | 320016         | 1.815       | 7.696            |
| 4           | 46.103    | 122399       | 14897542       | 84.502      | 2.969            |

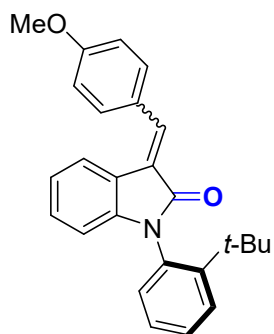

1-(2-(*tert*-butyl)phenyl)-3-(4-methoxybenzylidene)indolin-2-one (**7-3**)

Yellow oil (34.9 mg, 91% yield, *Z/E*  $\approx$  1:3.2, 96% ee, 96% ee). (*Z*)&(*E*) Form:  $[\alpha]_D^{25} = +2.0$  ( $c = 0.3$  in MeOH).  $^1\text{H NMR}$  (500 MHz,  $\text{CDCl}_3$ )  $\delta$  8.45 (d,  $J = 8.9$  Hz, 0.56H), 7.89 (s, 1H), 7.84 (d,  $J = 7.7$  Hz, 1H), 7.73 (d,  $J = 8.6$  Hz, 2H), 7.66 (ddd,  $J = 8.0, 3.9, 1.2$  Hz, 1.29H), 7.59 (t,  $J = 3.6$  Hz, 0.55H), 7.46 – 7.39 (m, 1.31H), 7.33 (tdd,  $J = 6.0, 4.7, 1.4$  Hz, 1.33H), 7.16 (t,  $J = 7.7$  Hz, 1.32H), 7.09 – 7.04 (m, 1.56H), 7.02 (d,  $J = 8.7$  Hz, 2H), 6.96 – 6.90 (m, 1.46H), 6.36 (dd,  $J = 7.7, 3.3$  Hz, 1.22H), 3.90 (s, 3H), 3.86 (s, 0.76H), 1.34 (s, 9H), 1.31 (s, 2.24H).  $^{13}\text{C NMR}$  (126 MHz,  $\text{CDCl}_3$ )  $\delta$  169.77, 167.49, 161.68, 160.89, 149.59, 146.19, 144.03, 138.1, 137.7, 134.7, 133.3, 133.3, 131.5, 131.3, 131.2, 129.3, 129.3, 129.2, 128.9, 128.9, 128.1, 127.9, 127.8, 127.3, 127.0, 125.3, 125.0, 123.4, 122.2, 121.8, 121.5, 118.4, 114.1, 113.8, 110.8, 110.3, 55.4, 55.4, 35.7, 35.7, 31.7, 31.7.

**HRMS (ESI)**: calcd for  $\text{C}_{26}\text{H}_{26}\text{NO}_2$   $[\text{M}+\text{H}]^+$  384.1958; found 384.1956.

The ee was determined by Daicel Chiralcel AD-H (0.46 cm x 25 cm), hexane/isopropanol = 90/10, 1 mL/min,  $\lambda = 254$  nm,  $t_R$  (minor) = 6.940/11.974 min,  $t_R$  (major) = 8.935/12.897 min.

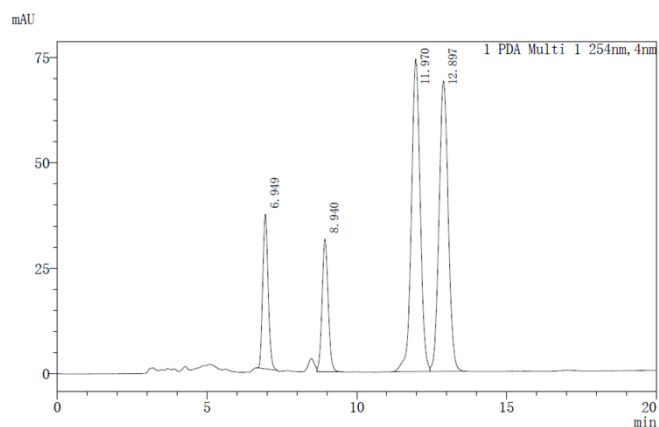

| PDA Ch1 254nm |           |              |                |             |                 |
|---------------|-----------|--------------|----------------|-------------|-----------------|
| NO.           | Ret. Time | Height (uAU) | Area (uAU*min) | Rel. Area % | Resolution(USP) |
| 1             | 6.949     | 36627        | 458735         | 11.797      | —               |
| 2             | 8.940     | 31472        | 447166         | 11.499      | 5.499           |
| 3             | 11.970    | 74123        | 1516006        | 38.985      | 6.636           |
| 4             | 12.897    | 68869        | 1466755        | 37.719      | 1.686           |

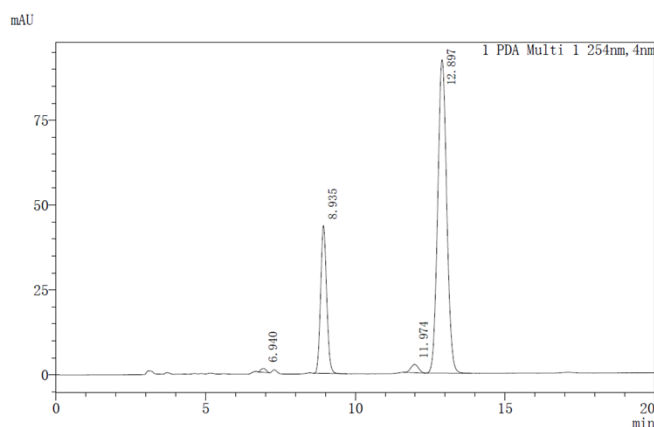

| PDA Ch1 254nm |           |              |                |             |                 |
|---------------|-----------|--------------|----------------|-------------|-----------------|
| NO.           | Ret. Time | Height (uAU) | Area (uAU*min) | Rel. Area % | Resolution(USP) |
| 1             | 6.940     | 1137         | 13558          | 0.521       | —               |
| 2             | 8.935     | 43554        | 608874         | 23.385      | 5.662           |
| 3             | 11.974    | 2443         | 43322          | 1.664       | 7.035           |
| 4             | 12.897    | 92366        | 1937961        | 74.431      | 1.764           |



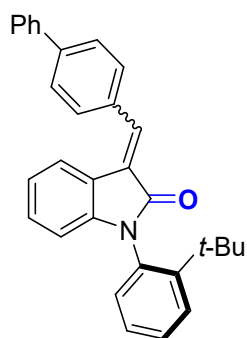

3-([1,1'-biphenyl]-4-ylmethylene)-1-(2-(*tert*-butyl)phenyl)indolin-2-one (**7-4**)

Yellow solid (39.9 mg, 93% yield, *Z/E*  $\approx$  1:4, 94% ee, 95% ee). (*Z*)&(*E*) Form:  $[\alpha]_D^{25} = +9.3$  ( $c = 0.15$  in MeOH),  $^1\text{H NMR}$  (500 MHz,  $\text{CDCl}_3$ )  $\delta$  8.48 (d,  $J = 8.3$  Hz, 0.31H), 7.97 (s, 1H), 7.83 (d,  $J = 8.3$  Hz, 3H), 7.74 (d,  $J = 8.2$  Hz, 2H), 7.69 (t,  $J = 8.9$  Hz, 3.56H), 7.66 – 7.62 (m, 0.65H), 7.50 (t,  $J = 7.6$  Hz, 2.15H), 7.45 (t,  $J = 7.5$  Hz, 1.45H), 7.41 (t,  $J = 7.4$  Hz, 1H), 7.37 – 7.32 (m, 1.38H), 7.18 (t,  $J = 7.7$  Hz, 1.22H), 7.07 (d,  $J = 6.8$  Hz, 1.33H), 6.93 (t,  $J = 7.6$  Hz, 1H), 6.37 (d,  $J = 7.8$  Hz, 1.17H), 1.36 (s, 9H), 1.33 (s, 1.57H).  $^{13}\text{C NMR}$  (126 MHz,  $\text{CDCl}_3$ )  $\delta$  169.5, 167.3, 149.6, 146.5, 144.5, 142.5, 140.4, 140.2, 137.5, 137.2, 133.9, 133.2, 133.0, 132.9, 131.3, 131.2, 130.1, 129.7, 129.4, 129.3, 129.0, 128.9, 128.8, 128.8, 127.9, 127.9, 127.8, 127.2, 127.1, 127.1, 126.9, 125.9, 124.7, 122.7, 121.9, 121.3, 118.9, 110.9, 110.5, 35.8, 35.7, 31.74, 31.69.

**HRMS (ESI)**: calcd for  $\text{C}_{31}\text{H}_{28}\text{NO}$   $[\text{M}+\text{H}]^+$  430.2165; found 430.2165.

The ee was determined by Daicel Chiralcel AD-H (0.46 cm x 25 cm), hexane/isopropanol = 95/5, 1 mL/min,  $\lambda = 254$  nm,  $t_R$  (minor) = 9.270/15.244 min,  $t_R$  (major) = 12.449/13.881 min.

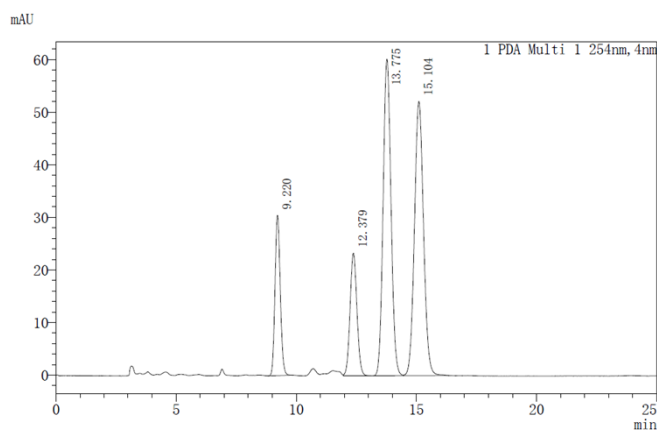

| PDA Ch1 254nm |           |              |                |             |                 |
|---------------|-----------|--------------|----------------|-------------|-----------------|
| NO.           | Ret. Time | Height (uAU) | Area (uAU*min) | Rel. Area % | Resolution(USP) |
| 1             | 9.220     | 30470        | 465948         | 12.680      | ---             |
| 2             | 12.379    | 23327        | 465200         | 12.659      | 6.704           |
| 3             | 13.775    | 60210        | 1372688        | 37.355      | 2.449           |
| 4             | 15.104    | 52169        | 1370906        | 37.306      | 2.041           |

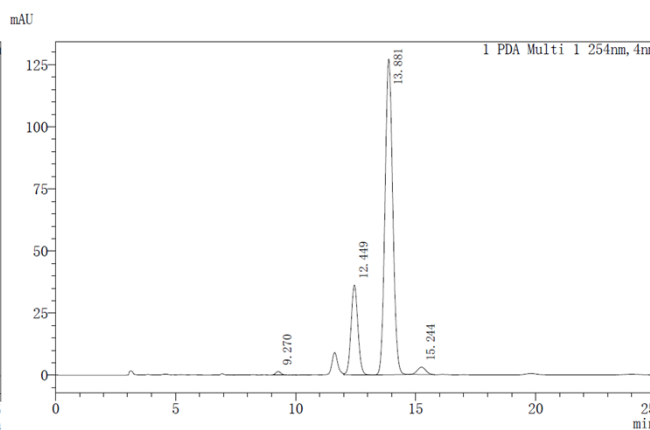

| PDA Ch1 254nm |           |              |                |             |                 |
|---------------|-----------|--------------|----------------|-------------|-----------------|
| NO.           | Ret. Time | Height (uAU) | Area (uAU*min) | Rel. Area % | Resolution(USP) |
| 1             | 9.270     | 1440         | 20613          | 0.563       | ---             |
| 2             | 12.449    | 36166        | 717479         | 19.591      | 6.876           |
| 3             | 13.881    | 127090       | 2849101        | 77.797      | 2.540           |
| 4             | 15.244    | 3008         | 75022          | 2.049       | 2.142           |

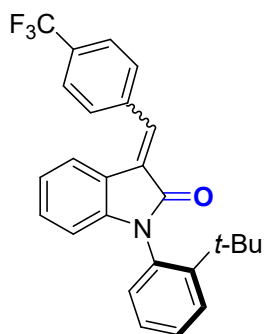

1-(2-(*tert*-butyl)phenyl)-3-(4-(trifluoromethyl)benzylidene)indolin-2-one (**7-5**)

(41.3 mg, 98% yield, *Z/E*  $\approx$  1:3.5, 78% ee, 82% ee). (*Z*) Form: yellow oil,  $[\alpha]_D^{25} = +32.0$  ( $c = 0.4$  in MeOH),  $^1\text{H NMR}$  (500 MHz,  $\text{CDCl}_3$ )  $\delta$  8.39 (d,  $J = 8.2$  Hz, 2H), 7.66 (d,  $J = 8.3$  Hz, 3H), 7.62 (d,  $J = 7.5$  Hz, 2H), 7.46 – 7.41 (m, 1H), 7.33 (td,  $J = 7.6, 1.2$  Hz, 1H), 7.22 (t,  $J = 7.7$  Hz, 1H), 7.09 (t,  $J = 7.6$  Hz, 1H), 7.05 (dd,  $J = 7.7, 1.2$  Hz, 1H), 6.38 (d,  $J = 7.8$  Hz, 1H), 1.31 (s, 9H).  $^{13}\text{C NMR}$  (126 MHz,  $\text{CDCl}_3$ )  $\delta$  166.9, 149.5, 145.0, 136.9, 135.2, 132.9, 132.0, 131.5 (q,  $J = 32.4$  Hz), 131.1, 129.7, 129.4, 129.0, 128.3, 127.9, 125.1 (q,  $J = 3.8$  Hz), 123.9, 122.2, 121.2 (q,  $J = 163.4$  Hz), 119.4, 110.7, 35.7, 31.7.  $^{19}\text{F NMR}$  (471 MHz,  $\text{CDCl}_3$ )  $\delta$  -62.9. (*E*) Form: yellow solid,  $[\alpha]_D^{25} = +11.3$  ( $c = 0.3$  in MeOH),  $^1\text{H NMR}$  (500 MHz,  $\text{CDCl}_3$ )  $\delta$  7.89 (s, 1H), 7.82 (d,  $J = 8.1$  Hz, 2H), 7.76 (d,  $J = 8.1$  Hz, 2H), 7.67 (d,  $J = 8.1$  Hz, 1H), 7.56 (d,  $J = 7.7$  Hz, 1H), 7.45 (t,  $J = 7.7$  Hz, 1H), 7.35 (t,  $J = 7.5$  Hz, 1H), 7.19 (t,  $J = 7.7$  Hz, 1H), 7.05 (d,  $J = 7.7$  Hz, 1H), 6.90 (t,  $J = 7.6$  Hz, 1H), 6.37 (d,  $J = 7.9$  Hz, 1H), 1.34 (s, 9H).  $^{13}\text{C NMR}$  (126 MHz,  $\text{CDCl}_3$ )  $\delta$  169.0, 149.6, 146.9, 138.7, 135.3, 132.9, 131.1 (q,  $J = 32.8$  Hz), 131.1, 130.5, 129.5, 129.5, 129.1, 129.0, 128.0, 125.7 (q,  $J = 3.6$  Hz), 123.9 (q,  $J = 272.3$  Hz), 122.7, 122.1, 120.7, 111.1, 35.7, 31.7.  $^{19}\text{F NMR}$  (471 MHz,  $\text{CDCl}_3$ )  $\delta$  -62.7.

**HRMS (ESI):** calcd for  $\text{C}_{26}\text{H}_{23}\text{F}_3\text{NO}$   $[\text{M}+\text{H}]^+$  422.1726; found 422.1726.

The ee was determined by Daicel Chiralcel AD-H (0.46 cm x 25 cm), hexane/isopropanol = 90/10, 1 mL/min,  $\lambda = 254$  nm,  $t_R$  (minor) = 4.856/7.262 min,  $t_R$  (major) = 5.765/8.998 min.

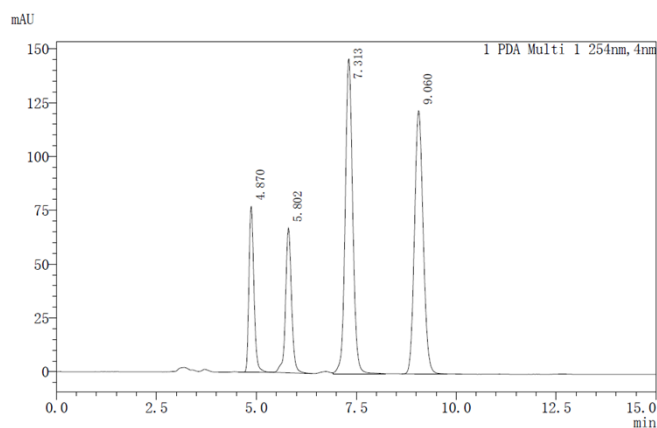

| PDA Ch1 254nm |           |              |                |             |                  |
|---------------|-----------|--------------|----------------|-------------|------------------|
| NO.           | Ret. Time | Height (uAU) | Area (uAU*min) | Rel. Area % | Resolution (USP) |
| 1             | 4.870     | 76966        | 667470         | 13.021      | --               |
| 2             | 5.802     | 67241        | 700589         | 13.667      | 3.635            |
| 3             | 7.313     | 146275       | 1906659        | 37.196      | 4.880            |
| 4             | 9.060     | 122268       | 1851275        | 36.115      | 4.650            |

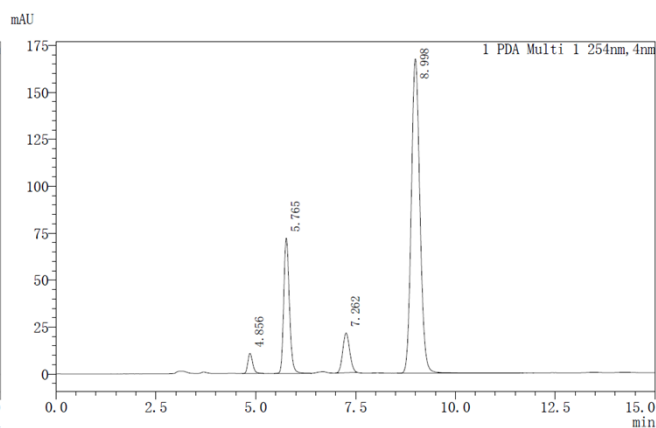

| PDA Ch1 254nm |           |              |                |             |                  |
|---------------|-----------|--------------|----------------|-------------|------------------|
| NO.           | Ret. Time | Height (uAU) | Area (uAU*min) | Rel. Area % | Resolution (USP) |
| 1             | 4.856     | 10721        | 89924          | 2.522       | --               |
| 2             | 5.765     | 72030        | 706386         | 19.814      | 3.628            |
| 3             | 7.262     | 21172        | 256897         | 7.206       | 4.987            |
| 4             | 8.998     | 167287       | 2511899        | 70.458      | 4.721            |

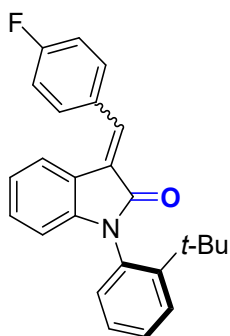

1-(2-(*tert*-butyl)phenyl)-3-(4-fluorobenzylidene)indolin-2-one (**7-6**)

Yellow oil (35.3 mg, 95% yield, *Z/E*  $\approx$  1:2.6, 90% ee, 90% ee). (*Z*) Form:  $[\alpha]_D^{25} = +36.5$  ( $c = 0.17$  in MeOH),  $^1\text{H NMR}$  (500 MHz,  $\text{CDCl}_3$ )  $\delta$  8.42 (dd,  $J = 8.8, 5.6$  Hz, 2H), 7.66 (dd,  $J = 8.2, 1.3$  Hz, 1H), 7.59 (d,  $J = 7.6$  Hz, 1H), 7.58 (s, 1H), 7.45 – 7.41 (m, 1H), 7.33 (td,  $J = 7.5, 1.4$  Hz, 1H), 7.19 (dd,  $J = 11.5, 4.8$  Hz, 1H), 7.12 – 7.04 (m, 4H), 6.37 (d,  $J = 7.8$  Hz, 1H), 1.31 (s, 9H).  $^{13}\text{C NMR}$  (126 MHz,  $\text{CDCl}_3$ )  $\delta$  167.3, 163.9 (d,  $J = 252.9$  Hz), 149.5, 144.5, 136.3, 134.6 (d,  $J = 8.8$  Hz), 133.1, 131.2, 130.2 (d,  $J = 2.9$  Hz), 129.3, 129.0, 128.9, 127.8, 125.6 (d,  $J = 2.4$  Hz), 124.5, 122.0, 118.8, 115.4 (d,  $J = 21.7$  Hz), 110.5, 35.7, 31.7.  $^{19}\text{F NMR}$  (471 MHz,  $\text{CDCl}_3$ )  $\delta$  -108.2. (*E*) Form:  $[\alpha]_D^{25} = +25.2$  ( $c = 0.31$  in MeOH),  $^1\text{H NMR}$  (500 MHz,  $\text{CDCl}_3$ )  $\delta$  7.87 (s, 1H), 7.72 (dd,  $J = 8.5, 5.5$  Hz, 2H), 7.69 – 7.65 (m, 2H), 7.46 – 7.41 (m, 1H), 7.34 (td,  $J = 7.5, 1.4$  Hz, 1H), 7.19 (t,  $J = 8.6$  Hz, 3H), 7.05 (dd,  $J = 7.7, 1.3$  Hz, 1H), 6.91 (t,  $J = 7.6$  Hz, 1H), 6.36 (d,  $J = 7.8$  Hz, 1H), 1.34 (s, 9H).  $^{13}\text{C NMR}$  (126 MHz,  $\text{CDCl}_3$ )  $\delta$  169.3, 163.3 (d,  $J = 251.3$  Hz), 149.6, 146.5, 136.6, 133.1, 131.4 (d,  $J = 8.4$  Hz), 131.2, 131.0 (d,  $J = 3.5$  Hz), 129.9, 129.4, 129.0, 127.9 (d,  $J = 10.7$  Hz), 127.2, 122.4, 121.9, 121.0, 115.9 (d,  $J = 21.8$  Hz), 111.0, 35.7, 31.67.  $^{19}\text{F NMR}$  (471 MHz,  $\text{CDCl}_3$ )  $\delta$  -109.9.

**HRMS (ESI)**: calcd for  $\text{C}_{25}\text{H}_{23}\text{FNO}$   $[\text{M}+\text{H}]^+$  372.1758; found 372.1761.

The ee was determined by Daicel Chiralcel AD-H (0.46 cm x 25 cm), hexane/isopropanol = 95/5, 1 mL/min,  $\lambda = 254$  nm, (*Z*) Form:  $t_R$  (minor) = 6.810,  $t_R$  (major) = 8.199; (*E*) Form:  $t_R$  (minor) = 12.944 min,  $t_R$  (major) = 15.041 min.

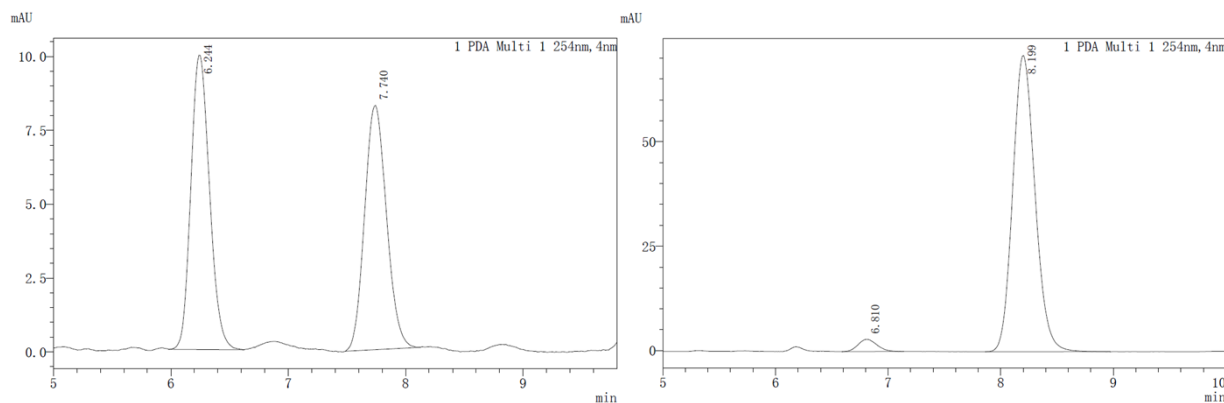

| PDA Ch1 254nm |           |              |                |             |                  | PDA Ch1 254nm |           |              |                |             |                  |
|---------------|-----------|--------------|----------------|-------------|------------------|---------------|-----------|--------------|----------------|-------------|------------------|
| NO.           | Ret. Time | Height (uAU) | Area (uAU*min) | Rel. Area % | Resolution (USP) | NO.           | Ret. Time | Height (uAU) | Area (uAU*min) | Rel. Area % | Resolution (USP) |
| 1             | 6.244     | 9970         | 110365         | 50.682      | —                | 1             | 6.810     | 2906         | 33504          | 3.316       | —                |
| 2             | 7.740     | 8269         | 107393         | 49.318      | 4.571            | 2             | 8.199     | 70913        | 976884         | 96.684      | 4.041            |

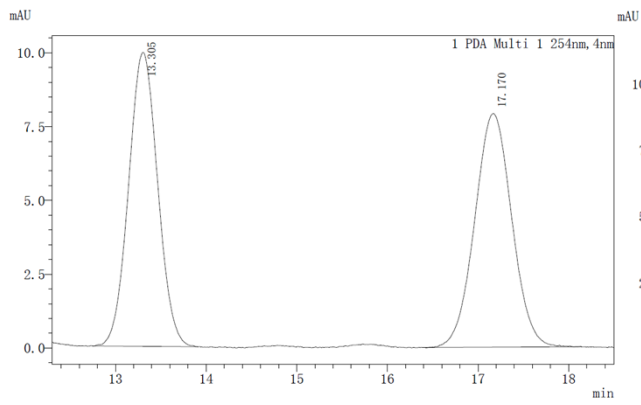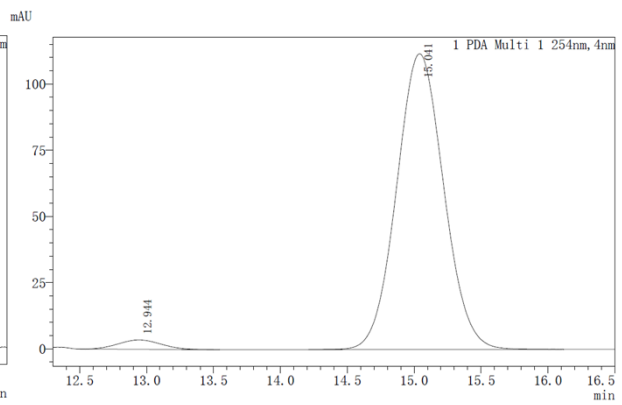

| PDA Ch1 254nm |           |              |                |             |                  |
|---------------|-----------|--------------|----------------|-------------|------------------|
| NO.           | Ret. Time | Height (uAU) | Area (uAU*min) | Rel. Area % | Resolution (USP) |
| 1             | 13.305    | 9956         | 222275         | 49.645      | --               |
| 2             | 17.170    | 7919         | 225457         | 50.355      | 5.716            |

| PDA Ch1 254nm |           |              |                |             |                  |
|---------------|-----------|--------------|----------------|-------------|------------------|
| NO.           | Ret. Time | Height (uAU) | Area (uAU*min) | Rel. Area % | Resolution (USP) |
| 1             | 12.944    | 3537         | 79200          | 2.814       | --               |
| 2             | 15.041    | 111633       | 2735398        | 97.186      | 3.329            |

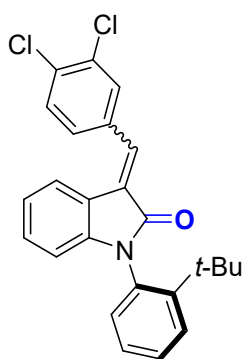

1-(2-(*tert*-butyl)phenyl)-3-(3,4-dichlorobenzylidene)indolin-2-one (**7-7**)

Yellow solid (41.7 mg, 99% yield, *Z/E*  $\approx$  1:2.1, 82% ee, 84% ee). (*Z*) Form:  $[\alpha]_D^{25} = +45.7$  ( $c = 0.07$  in MeOH),  $^1\text{H NMR}$  (500 MHz,  $\text{CDCl}_3$ )  $\delta$  8.53 (d,  $J = 1.6$  Hz, 1H), 8.20 (dd,  $J = 8.5, 1.6$  Hz, 1H), 7.66 (d,  $J = 8.1$  Hz, 1H), 7.58 (d,  $J = 7.5$  Hz, 1H), 7.47 (d,  $J = 6.6$  Hz, 2H), 7.43 (dd,  $J = 11.3, 4.1$  Hz, 1H), 7.33 (t,  $J = 7.5$  Hz, 1H), 7.21 (t,  $J = 7.6$  Hz, 1H), 7.08 (t,  $J = 7.6$  Hz, 1H), 7.05 (d,  $J = 7.7$  Hz, 1H), 6.37 (d,  $J = 7.8$  Hz, 1H), 1.31 (s, 9H).  $^{13}\text{C NMR}$  (126 MHz,  $\text{CDCl}_3$ )  $\delta$  167.0, 149.5, 144.9, 134.4, 134.3, 133.7, 133.5, 132.9, 132.5, 131.3, 131.1, 130.2, 129.6, 129.4, 129.1, 127.9, 127.7, 124.0, 122.2, 119.2, 110.7, 35.8, 31.7. (*E*) Form:  $[\alpha]_D^{25} = +7.1$  ( $c = 0.17$  in MeOH),  $^1\text{H NMR}$  (500 MHz,  $\text{CDCl}_3$ )  $\delta$  7.81 (s, 1H), 7.77 (s, 1H), 7.67 (d,  $J = 8.1$  Hz, 1H), 7.60 (d,  $J = 7.7$  Hz, 1H), 7.56 (q,  $J = 8.3$  Hz, 2H), 7.44 (t,  $J = 7.6$  Hz, 1H), 7.34 (t,  $J = 7.4$  Hz, 1H), 7.19 (t,  $J = 7.7$  Hz, 1H), 7.04 (d,  $J = 7.6$  Hz, 1H), 6.93 (t,  $J = 7.6$  Hz, 1H), 6.36 (d,  $J = 7.9$  Hz, 1H), 1.34 (s, 9H).  $^{13}\text{C NMR}$  (126 MHz,  $\text{CDCl}_3$ )  $\delta$  168.9, 149.6, 146.8, 135.0, 134.4, 133.5, 133.1, 132.9, 131.1, 130.9, 130.8, 130.4, 129.5, 129.0, 128.7, 128.5, 128.0, 122.7, 122.2, 120.6, 111.1, 35.7, 31.7.

**HRMS (ESI):** calcd for  $\text{C}_{25}\text{H}_{22}\text{Cl}_2\text{NO}$   $[\text{M}+\text{H}]^+$  422.1073; found 422.1071.

The ee was determined by Daicel Chiralcel AD-H (0.46 cm x 25 cm), hexane/isopropanol = 90/10, 1 mL/min,  $\lambda = 254$  nm,  $t_R$  (minor) = 5.138/7.250 min,  $t_R$  (major) = 5.669/9.181 min.

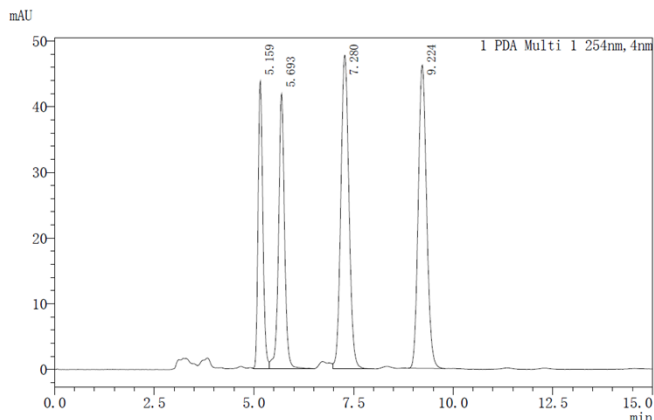

| PDA Ch1 254nm |           |              |                |             |                 |
|---------------|-----------|--------------|----------------|-------------|-----------------|
| NO.           | Ret. Time | Height (uAU) | Area (uAU*min) | Rel. Area % | Resolution(USP) |
| 1             | 5.159     | 43761        | 362393         | 16.860      | --              |
| 2             | 5.693     | 41871        | 435857         | 20.278      | 2.111           |
| 3             | 7.280     | 47742        | 676465         | 31.472      | 4.851           |
| 4             | 9.224     | 46195        | 674682         | 31.389      | 5.025           |

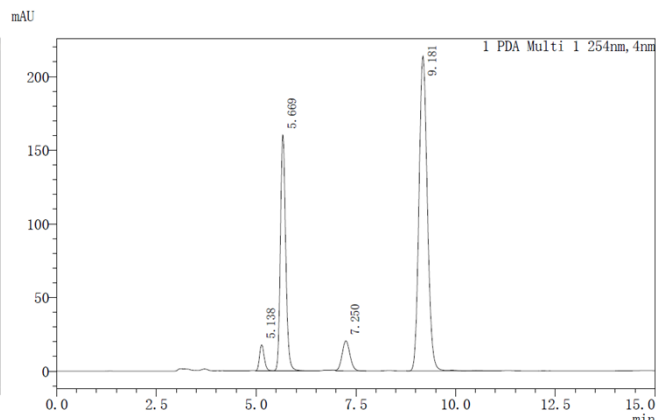

| PDA Ch1 254nm |           |              |                |             |                 |
|---------------|-----------|--------------|----------------|-------------|-----------------|
| NO.           | Ret. Time | Height (uAU) | Area (uAU*min) | Rel. Area % | Resolution(USP) |
| 1             | 5.138     | 17724        | 146354         | 2.907       | --              |
| 2             | 5.669     | 160157       | 1482038        | 29.437      | 2.189           |
| 3             | 7.250     | 20387        | 279348         | 5.549       | 5.066           |
| 4             | 9.181     | 213833       | 3126895        | 62.108      | 5.068           |

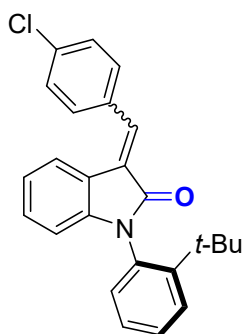

1-(2-(*tert*-butyl)phenyl)-3-(4-chlorobenzylidene)indolin-2-one (**7-8**)

Yellow oil (37.2 mg, 96% yield,  $Z/E \approx 1:2.8$ , 96% ee, 96% ee). (*Z*) Form:  $[\alpha]_D^{25} = +51.1$  ( $c = 0.09$  in MeOH),  $^1\text{H NMR}$  (500 MHz,  $\text{CDCl}_3$ )  $\delta$  8.32 (d,  $J = 8.6$  Hz, 2H), 7.66 (dd,  $J = 8.1, 1.2$  Hz, 1H), 7.59 (d,  $J = 7.5$  Hz, 1H), 7.55 (s, 1H), 7.45 – 7.40 (m, 1H), 7.38 (d,  $J = 8.6$  Hz, 2H), 7.33 (td,  $J = 7.5, 1.3$  Hz, 1H), 7.19 (dd,  $J = 11.2, 4.1$  Hz, 1H), 7.08 (t,  $J = 7.6$  Hz, 1H), 7.05 (dd,  $J = 7.7, 1.4$  Hz, 1H), 6.37 (d,  $J = 7.8$  Hz, 1H), 1.31 (s, 9H).  $^{13}\text{C NMR}$  (126 MHz,  $\text{CDCl}_3$ )  $\delta$  167.2, 149.5, 144.6, 136.5, 136.0, 133.5, 133.0, 132.3, 131.2, 129.3, 129.1, 129.0, 128.5, 127.9, 126.5, 124.3, 122.1, 119.0, 110.6, 35.7, 31.7. (*E*) Form:  $[\alpha]_D^{25} = +20.0$  ( $c = 0.18$  in MeOH),  $^1\text{H NMR}$  (500 MHz,  $\text{CDCl}_3$ )  $\delta$  7.85 (s, 1H), 7.66 (dd,  $J = 7.0, 4.9$  Hz, 4H), 7.47 (d,  $J = 8.4$  Hz, 2H), 7.46 – 7.42 (m, 1H), 7.34 (td,  $J = 7.5, 1.4$  Hz, 1H), 7.17 (td,  $J = 7.8, 0.8$  Hz, 1H), 7.04 (dd,  $J = 7.7, 1.4$  Hz, 1H), 6.91 (td,  $J = 7.7, 0.8$  Hz, 1H), 6.36 (d,  $J = 7.8$  Hz, 1H), 1.34 (s, 9H).  $^{13}\text{C NMR}$  (126 MHz,  $\text{CDCl}_3$ )  $\delta$  169.2, 149.6, 146.6, 136.2, 135.5, 133.5, 133.4, 133.0, 131.1, 130.7, 130.0, 129.4, 129.0, 127.9, 127.8, 122.6, 122.0, 120.9, 111.0, 35.7, 31.7.

**HRMS (ESI)**: calcd for  $\text{C}_{25}\text{H}_{23}\text{ClNO}$   $[\text{M}+\text{H}]^+$  388.1463; found 388.1459.

The ee was determined by Daicel Chiralcel AD-H (0.46 cm x 25 cm), hexane/isopropanol = 95/5, 1 mL/min,  $\lambda = 254$  nm,  $t_R$  (minor) = 6.810/12.944 min,  $t_R$  (major) = 8.199/15.041 min.

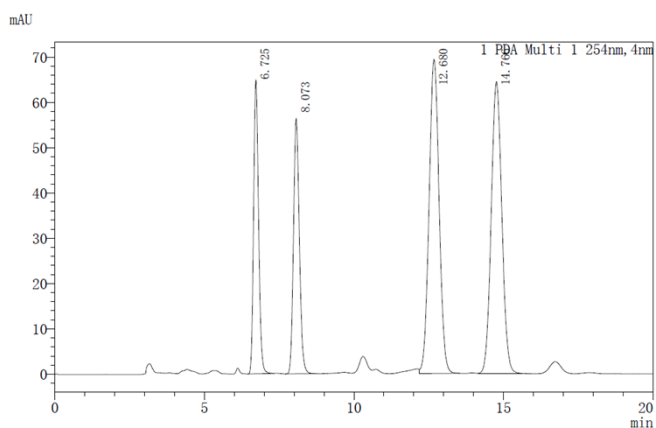

| PDA Ch1 254nm |           |              |                |             |                  |
|---------------|-----------|--------------|----------------|-------------|------------------|
| NO.           | Ret. Time | Height (uAU) | Area (uAU*min) | Rel. Area % | Resolution (USP) |
| 1             | 6.725     | 64795        | 747226         | 15.849      | —                |
| 2             | 8.073     | 56295        | 768234         | 16.294      | 3.966            |
| 3             | 12.680    | 69341        | 1615767        | 34.271      | 9.320            |
| 4             | 14.766    | 64409        | 1583503        | 33.586      | 3.268            |

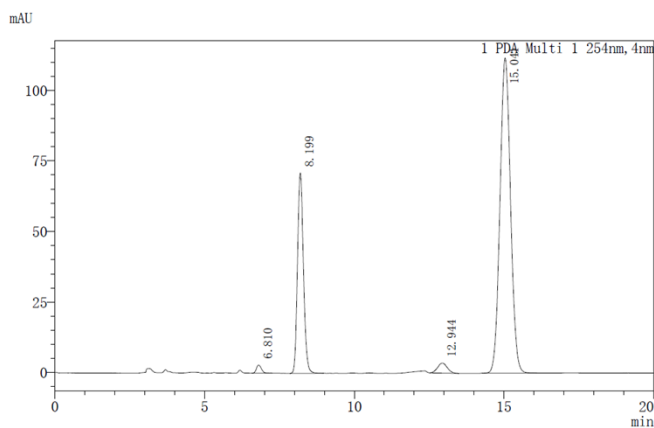

| PDA Ch1 254nm |           |              |                |             |                  |
|---------------|-----------|--------------|----------------|-------------|------------------|
| NO.           | Ret. Time | Height (uAU) | Area (uAU*min) | Rel. Area % | Resolution (USP) |
| 1             | 6.810     | 2906         | 33504          | 0.875       | —                |
| 2             | 8.199     | 70913        | 976884         | 25.519      | 4.041            |
| 3             | 12.944    | 3544         | 79598          | 2.079       | 9.700            |
| 4             | 15.041    | 111656       | 2738076        | 71.526      | 3.326            |

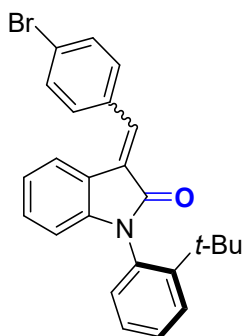

3-(4-bromobenzylidene)-1-(2-(*tert*-butyl)phenyl)indolin-2-one (**7-9**)

Yellow oil (32.8 mg, 76% yield, *Z/E*  $\approx$  1:3.2, 86% ee, 86% ee). (*E*) Form:  $[\alpha]_D^{25} = +11.4$  ( $c = 0.07$  in MeOH),  $^1\text{H NMR}$  (500 MHz,  $\text{CDCl}_3$ )  $\delta$  7.82 (s, 1H), 7.65 (dd,  $J = 16.6, 8.5$  Hz, 4H), 7.59 (d,  $J = 8.3$  Hz, 2H), 7.44 (t,  $J = 7.3$  Hz, 1H), 7.34 (t,  $J = 7.2$  Hz, 1H), 7.17 (t,  $J = 7.7$  Hz, 1H), 7.04 (d,  $J = 7.5$  Hz, 1H), 6.91 (t,  $J = 7.6$  Hz, 1H), 6.36 (d,  $J = 7.8$  Hz, 1H), 1.34 (s, 9H).  $^{13}\text{C NMR}$  (126 MHz,  $\text{CDCl}_3$ )  $\delta$  169.2, 149.6, 146.6, 136.2, 133.9, 133.0, 132.0, 131.2, 130.9, 130.1, 129.4, 129.0, 127.9, 127.8, 123.9, 122.6, 122.0, 120.9, 111.0, 35.7, 31.7.

**HRMS (ESI):** calcd for  $\text{C}_{25}\text{H}_{23}\text{BrNO}$   $[\text{M}+\text{H}]^+$  432.0958; found 432.0960.

The ee was determined by Daicel Chiralcel AD-H (0.46 cm x 25 cm), hexane/isopropanol = 90/10, 1 mL/min,  $\lambda = 254$  nm,  $t_R$  (minor) = 5.669/8.801 min,  $t_R$  (major) = 6.763/10.002 min.

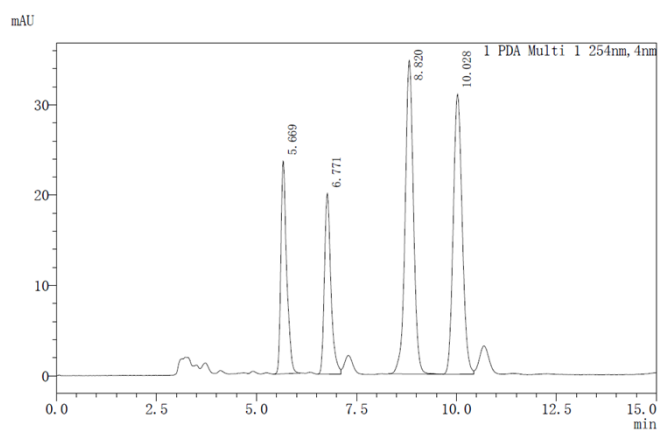

| PDA Ch1 254nm |           |              |                |             |                 |
|---------------|-----------|--------------|----------------|-------------|-----------------|
| NO.           | Ret. Time | Height (uAU) | Area (uAU*min) | Rel. Area % | Resolution(USP) |
| 1             | 5.669     | 23540        | 237717         | 16.423      | --              |
| 2             | 6.771     | 19986        | 225561         | 15.583      | 3.891           |
| 3             | 8.820     | 34721        | 501531         | 34.649      | 6.047           |
| 4             | 10.028    | 31005        | 482647         | 33.344      | 3.028           |

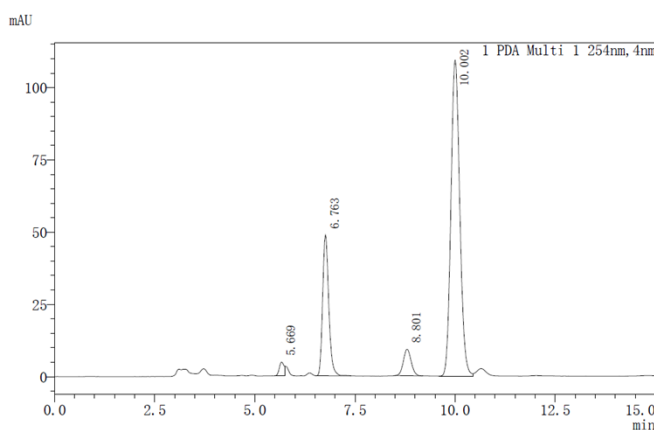

| PDA Ch1 254nm |           |              |                |             |                 |
|---------------|-----------|--------------|----------------|-------------|-----------------|
| NO.           | Ret. Time | Height (uAU) | Area (uAU*min) | Rel. Area % | Resolution(USP) |
| 1             | 5.669     | 4735         | 39084          | 1.659       | --              |
| 2             | 6.763     | 48755        | 515713         | 21.886      | 3.542           |
| 3             | 8.801     | 9170         | 124183         | 5.270       | 6.235           |
| 4             | 10.002    | 109316       | 1677431        | 71.186      | 3.077           |

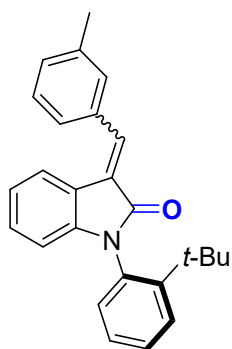

1-(2-(*tert*-butyl)phenyl)-3-(3-methylbenzylidene)indolin-2-one (**7-10**)

Yellow oil (36.0 mg, 98% yield, *Z/E*  $\approx$  1:4.4, 96% ee, 96% ee). (*Z*)&(*E*) Form:  $[\alpha]_D^{25} = +18.7$  ( $c = 0.3$  in MeOH),  $^1\text{H NMR}$  (500 MHz,  $\text{CDCl}_3$ )  $\delta$  8.24 (s, 0.16H), 8.15 (d,  $J = 7.8$  Hz, 0.16H), 7.93 (s, 1H), 7.73 (d,  $J = 7.7$  Hz, 1H), 7.67 (d,  $J = 7.4$  Hz, 1.24H), 7.61 (d,  $J = 7.4$  Hz, 0.36H), 7.54 (d,  $J = 7.5$  Hz, 2H), 7.46 – 7.42 (m, 1.15H), 7.39 (t,  $J = 7.7$  Hz, 1.15H), 7.35 (dd,  $J = 10.7, 4.1$  Hz, 1.45H), 7.25 (dd,  $J = 14.9, 7.3$  Hz, 1.49H), 7.17 (dt,  $J = 15.4, 7.6$  Hz, 1.34H), 7.06 (dd,  $J = 5.5, 2.1$  Hz, 1.36H), 6.90 (t,  $J = 7.6$  Hz, 1H), 6.35 (d,  $J = 7.8$  Hz, 1.2H), 2.44 (s, 3H), 2.41 (s, 0.57H), 1.35 (s, 9H), 1.32 (s, 1.86H).  $^{13}\text{C NMR}$  (126 MHz,  $\text{CDCl}_3$ )  $\delta$  169.5, 167.2, 149.6, 146.4, 144.5, 138.3, 138.2, 137.9, 137.9, 134.9, 133.8, 133.2, 132.7, 131.5, 131.3, 131.2, 130.4, 130.0, 129.6, 129.6, 129.3, 129.2, 128.9, 128.7, 128.5, 128.2, 127.9, 127.8, 127.1, 126.4, 125.8, 124.7, 122.6, 121.9, 121.3, 118.8, 110.8, 110.4, 35.7, 35.7, 31.7, 31.7, 21.4, 21.4.

**HRMS (ESI)**: calcd for  $\text{C}_{26}\text{H}_{26}\text{NO}$   $[\text{M}+\text{H}]^+$  368.2009; found 368.2011.

The ee was determined by Daicel Chiralcel AD-H (0.46 cm x 25 cm), hexane/isopropanol = 98/2, 1 mL/min,  $\lambda = 254$  nm,  $t_R$  (minor) = 7.903/18.704 min,  $t_R$  (major) = 8.743/28.220 min.

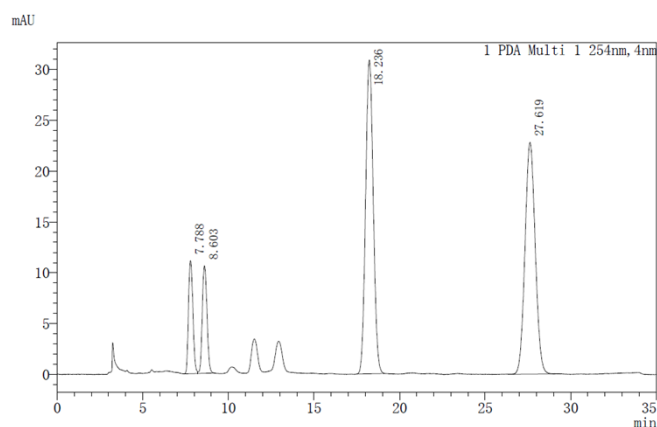

| PDA Ch1 254nm |           |              |                |             |                  |
|---------------|-----------|--------------|----------------|-------------|------------------|
| NO.           | Ret. Time | Height (uAU) | Area (uAU*min) | Rel. Area % | Resolution (USP) |
| 1             | 7.788     | 11119        | 199241         | 8.634       | —                |
| 2             | 8.603     | 10581        | 202224         | 8.763       | 1.659            |
| 3             | 18.236    | 30882        | 960373         | 41.616      | 14.425           |
| 4             | 27.619    | 22792        | 945876         | 40.988      | 9.715            |

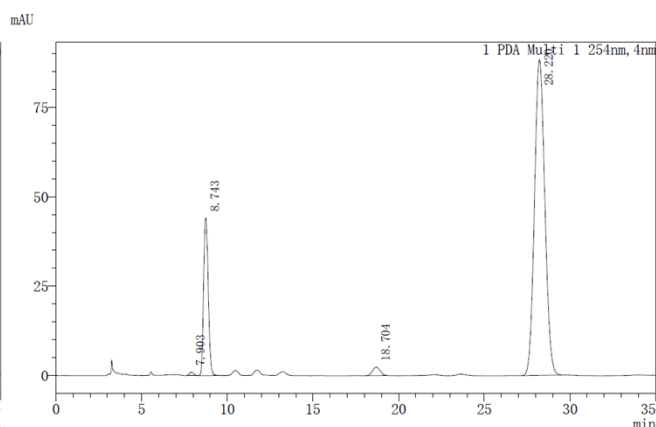

| PDA Ch1 254nm |           |              |                |             |                  |
|---------------|-----------|--------------|----------------|-------------|------------------|
| NO.           | Ret. Time | Height (uAU) | Area (uAU*min) | Rel. Area % | Resolution (USP) |
| 1             | 7.903     | 989          | 17669          | 0.381       | —                |
| 2             | 8.743     | 44063        | 834549         | 18.001      | 1.698            |
| 3             | 18.704    | 2382         | 73459          | 1.585       | 14.780           |
| 4             | 28.220    | 88271        | 3710334        | 80.033      | 9.696            |



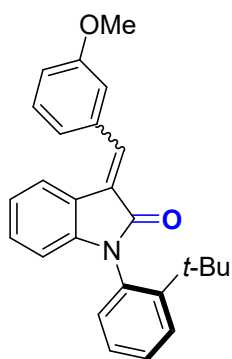

1-(2-(*tert*-butyl)phenyl)-3-(3-methoxybenzylidene)indolin-2-one (**7-11**)

Yellow oil (34.9 mg, 91% yield, *Z/E*  $\approx$  1:4.2, 90% ee, 90% ee). (*Z*)&(*E*) Form:  $[\alpha]_D^{25} = +22.5$  ( $c = 0.24$  in MeOH), **<sup>1</sup>H NMR** (500 MHz, CDCl<sub>3</sub>)  $\delta$  8.38 (s, 0.16H), 7.91 (s, 1H), 7.75 (d,  $J = 7.7$  Hz, 1H), 7.68 (t,  $J = 9.5$  Hz, 1.40H), 7.61 (t,  $J = 3.6$  Hz, 0.36H), 7.42 (dt,  $J = 15.3$ , 7.6 Hz, 2.28H), 7.33 (dd,  $J = 15.5$ , 7.7 Hz, 2.47H), 7.24 (s, 1H), 7.17 (dt,  $J = 15.3$ , 7.8 Hz, 1.26H), 7.07 (dd,  $J = 12.4$ , 7.7 Hz, 1.38H), 7.00 (dd,  $J = 8.1$ , 2.2 Hz, 1.21H), 6.90 (t,  $J = 7.6$  Hz, 1H), 6.35 (t,  $J = 6.1$  Hz, 1.19H), 3.87 (s, 3.65H), 1.35 (s, 9H), 1.32 (s, 1.85H). **<sup>13</sup>C NMR** (126 MHz, CDCl<sub>3</sub>)  $\delta$  169.4, 167.2, 159.7, 159.5, 149.6, 149.6, 146.5, 144.5, 137.7, 137.7, 136.3, 135.2, 133.2, 133.2, 131.3, 131.2, 129.7, 129.4, 129.3, 129.1, 129.0, 128.8, 127.9, 127.9, 127.4, 126.2, 125.4, 124.6, 122.9, 121.9, 121.9, 121.8, 121.2, 118.9, 117.8, 115.9, 115.6, 114.3, 110.8, 110.4, 55.5, 55.4, 35.7, 31.7.

**HRMS (ESI)**: calcd for C<sub>26</sub>H<sub>26</sub>NO<sub>2</sub> [M+H]<sup>+</sup> 384.1958; found 384.1956.

The ee was determined by Daicel Chiralcel OD-H (0.46 cm x 25 cm), hexane/isopropanol = 90/10, 1 mL/min,  $\lambda = 254$  nm,  $t_R$  (minor) = 5.873/7.513 min,  $t_R$  (major) = 5.076/6.797 min.

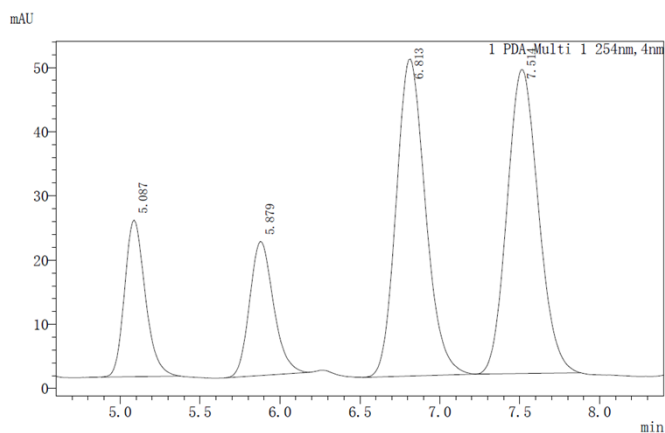

| PDA Ch1 254nm |           |              |                |             |                  |
|---------------|-----------|--------------|----------------|-------------|------------------|
| NO.           | Ret. Time | Height (uAU) | Area (uAU*min) | Rel. Area % | Resolution (USP) |
| 1             | 5.087     | 24398        | 219522         | 12.803      | —                |
| 2             | 5.879     | 20903        | 217435         | 12.681      | 2.971            |
| 3             | 6.813     | 49392        | 630843         | 36.793      | 2.966            |
| 4             | 7.514     | 47352        | 646795         | 37.723      | 1.961            |

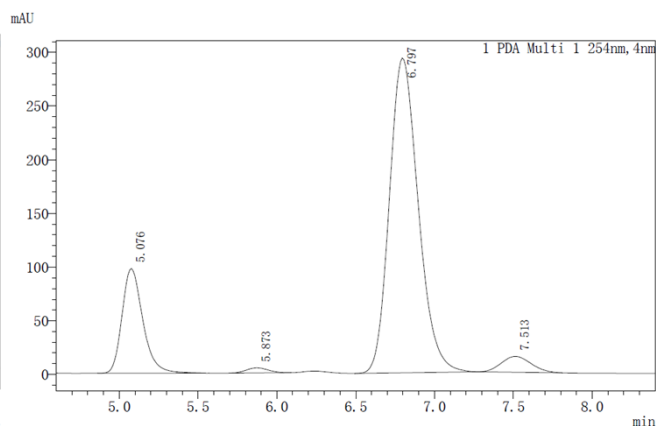

| PDA Ch1 254nm |           |              |                |             |                  |
|---------------|-----------|--------------|----------------|-------------|------------------|
| NO.           | Ret. Time | Height (uAU) | Area (uAU*min) | Rel. Area % | Resolution (USP) |
| 1             | 5.076     | 97542        | 891526         | 18.327      | —                |
| 2             | 5.873     | 4763         | 45761          | 0.941       | 3.062            |
| 3             | 6.797     | 293177       | 3733407        | 76.746      | 3.008            |
| 4             | 7.513     | 14778        | 193941         | 3.987       | 2.029            |

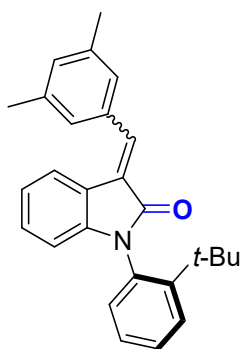

1-(2-(*tert*-butyl)phenyl)-3-(3,5-dimethylbenzylidene)indolin-2-one (**7-12**)

(37.7 mg, 99% yield, *Z/E* ≈ 1:5.6, 95% ee, 97% ee). (*Z*) Form: yellow oil,  $[\alpha]_D^{25} = +50.7$  ( $c = 0.15$  in MeOH),  $^1\text{H NMR}$  (500 MHz,  $\text{CDCl}_3$ )  $\delta$  8.02 (s, 2H), 7.65 (d,  $J = 8.1$  Hz, 1H), 7.59 (d,  $J = 7.8$  Hz, 2H), 7.42 (t,  $J = 7.7$  Hz, 1H), 7.33 (t,  $J = 7.4$  Hz, 1H), 7.17 (t,  $J = 7.6$  Hz, 1H), 7.07 (t,  $J = 6.3$  Hz, 3H), 6.34 (d,  $J = 7.8$  Hz, 1H), 2.36 (s, 6H), 1.31 (s, 9H).  $^{13}\text{C NMR}$  (126 MHz,  $\text{CDCl}_3$ )  $\delta$  167.2, 149.6, 144.4, 138.2, 137.8, 133.8, 133.3, 132.6, 131.4, 130.1, 129.3, 129.0, 128.6, 127.9, 125.6, 124.8, 121.8, 118.7, 110.4, 35.8, 31.7, 21.3. (*E*) Form: yellow solid,  $[\alpha]_D^{25} = +13.3$  ( $c = 0.27$  in MeOH),  $^1\text{H NMR}$  (500 MHz,  $\text{CDCl}_3$ )  $\delta$  7.91 (s, 1H), 7.74 (d,  $J = 7.7$  Hz, 1H), 7.67 (d,  $J = 8.0$  Hz, 1H), 7.44 (t,  $J = 7.6$  Hz, 1H), 7.34 (d,  $J = 11.7$  Hz, 3H), 7.16 (t,  $J = 7.7$  Hz, 1H), 7.12 – 7.03 (m, 2H), 6.90 (t,  $J = 7.6$  Hz, 1H), 6.35 (d,  $J = 7.8$  Hz, 1H), 2.40 (s, 6H), 1.35 (s, 9H).  $^{13}\text{C NMR}$  (126 MHz,  $\text{CDCl}_3$ )  $\delta$  169.5, 149.6, 146.4, 138.5, 138.2, 134.9, 133.3, 131.3, 131.2, 130.1, 129.5, 129.3, 128.9, 127.9, 127.1, 122.6, 121.8, 121.4, 110.8, 35.7, 31.7, 21.2.

**HRMS (ESI)**: calcd for  $\text{C}_{27}\text{H}_{28}\text{NO}$   $[\text{M}+\text{H}]^+$  382.2165; found 382.2167.

The ee was determined by Daicel Chiralcel AD-H (0.46 cm x 25 cm), hexane/isopropanol = 90/10, 1 mL/min,  $\lambda = 254$  nm,  $t_R$  (minor) = 4.234/6.046 min,  $t_R$  (major) = 4.504/8.485 min.

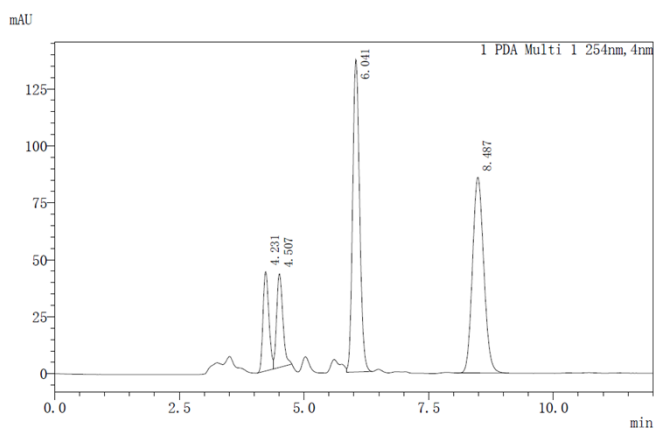

| PDA Ch1 254nm |           |              |                |             |                  |
|---------------|-----------|--------------|----------------|-------------|------------------|
| NO.           | Ret. Time | Height (uAU) | Area (uAU*min) | Rel. Area % | Resolution (USP) |
| 1             | 4.231     | 43617        | 357133         | 10.510      | --               |
| 2             | 4.507     | 41043        | 356766         | 10.499      | 1.165            |
| 3             | 6.041     | 137255       | 1330629        | 39.160      | 6.030            |
| 4             | 8.487     | 85997        | 1353410        | 39.830      | 7.084            |

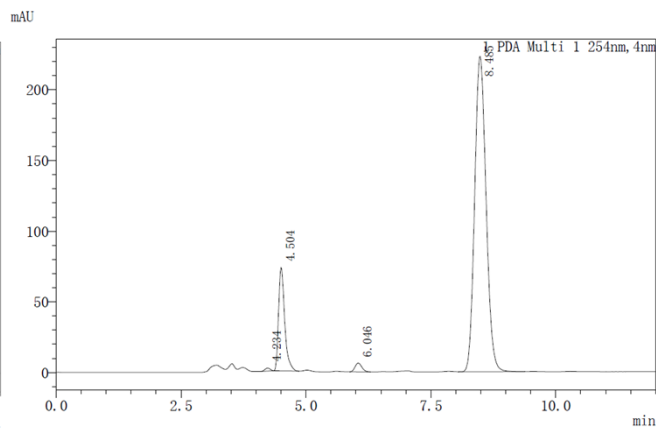

| PDA Ch1 254nm |           |              |                |             |                  |
|---------------|-----------|--------------|----------------|-------------|------------------|
| NO.           | Ret. Time | Height (uAU) | Area (uAU*min) | Rel. Area % | Resolution (USP) |
| 1             | 4.234     | 2146         | 15925          | 0.375       | --               |
| 2             | 4.504     | 73058        | 624982         | 14.720      | 1.211            |
| 3             | 6.046     | 6203         | 58466          | 1.377       | 6.211            |
| 4             | 8.485     | 223171       | 3546311        | 83.527      | 7.072            |

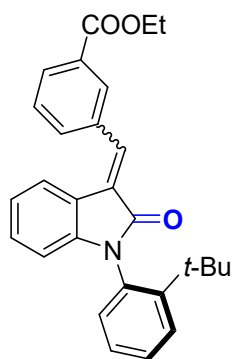

ethyl 3-((1-(2-(*tert*-butyl)phenyl)-2-oxoindolin-3-ylidene)methyl)benzoate (**7-13**)

Yellow oil (27.2 mg, 64% yield, *Z/E*  $\approx$  1:4.1, 83% ee, 82% ee). (*E*) Form:  $[\alpha]_D^{25} = +16.0$  ( $c = 0.2$  in MeOH),  $^1\text{H NMR}$  (500 MHz,  $\text{CDCl}_3$ )  $\delta = 8.43$  (s, 1H), 8.13 (d,  $J = 7.8$  Hz, 1H), 7.93 (s, 1H), 7.88 (d,  $J = 7.7$  Hz, 1H), 7.67 (dd,  $J = 8.2, 1.5$  Hz, 1H), 7.63 (d,  $J = 7.7$  Hz, 1H), 7.58 (t,  $J = 7.7$  Hz, 1H), 7.44 (td,  $J = 7.7, 1.5$  Hz, 1H), 7.34 (td,  $J = 7.5, 1.5$  Hz, 1H), 7.17 (t,  $J = 7.7$  Hz, 1H), 7.06 (dd,  $J = 7.8, 1.6$  Hz, 1H), 6.90 (t,  $J = 7.6$  Hz, 1H), 6.36 (d,  $J = 7.9$  Hz, 1H), 4.43 (q,  $J = 7.1$  Hz, 2H), 1.42 (t,  $J = 7.2$  Hz, 3H), 1.34 (s, 9H).  $^{13}\text{C NMR}$  (126 MHz,  $\text{CDCl}_3$ )  $\delta = 169.2, 166.0, 149.6, 146.7, 136.3, 135.3, 133.5, 133.1, 131.2, 131.1, 130.5, 130.3, 130.1, 129.4, 129.0, 128.8, 128.2, 127.9, 122.7, 122.1, 120.9, 111.0, 61.3, 35.7, 31.7, 14.3$ .

**HRMS (ESI)**: calcd for  $\text{C}_{28}\text{H}_{28}\text{NO}_3$   $[\text{M}+\text{H}]^+$  426.2064; found 426.2062.

The ee was determined by Daicel Chiralcel OD-H (0.46 cm x 25 cm), hexane/isopropanol = 98/2, 1 mL/min,  $\lambda = 254$  nm,  $t_R$  (minor) = 15.112/20.068 min,  $t_R$  (major) = 11.946/16.742 min.

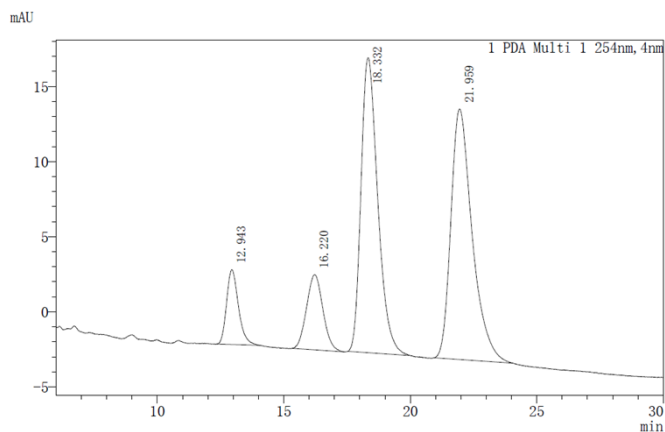

| PDA Ch1 254nm |           |              |                |             |                  |
|---------------|-----------|--------------|----------------|-------------|------------------|
| NO.           | Ret. Time | Height (uAU) | Area (uAU*min) | Rel. Area % | Resolution (USP) |
| 1             | 12.943    | 4981         | 162028         | 7.152       | —                |
| 2             | 16.220    | 5007         | 224714         | 9.919       | 3.213            |
| 3             | 18.332    | 19631        | 903687         | 39.888      | 1.760            |
| 4             | 21.959    | 16666        | 975105         | 43.041      | 2.690            |

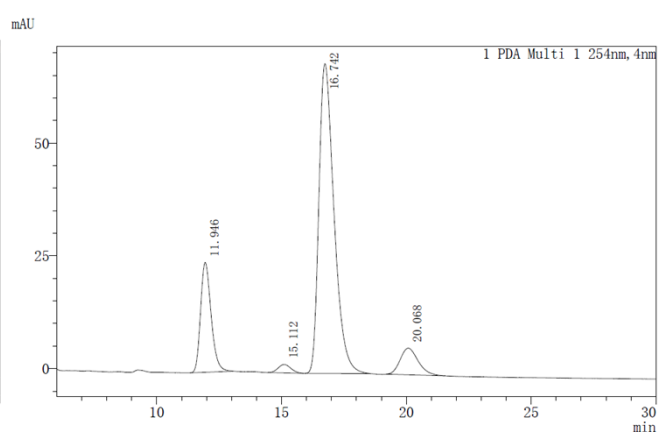

| PDA Ch1 254nm |           |              |                |             |                  |
|---------------|-----------|--------------|----------------|-------------|------------------|
| NO.           | Ret. Time | Height (uAU) | Area (uAU*min) | Rel. Area % | Resolution (USP) |
| 1             | 11.946    | 24358        | 715648         | 18.022      | —                |
| 2             | 15.112    | 1880         | 66852          | 1.684       | 3.703            |
| 3             | 16.742    | 68712        | 2893235        | 72.860      | 1.601            |
| 4             | 20.068    | 5899         | 295235         | 7.435       | 2.764            |

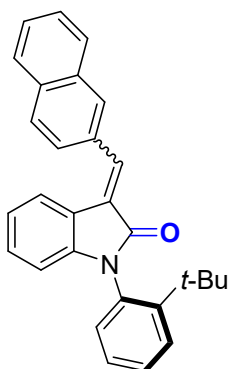

1-(2-(*tert*-butyl)phenyl)-3-(naphthalen-2-ylmethylene)indolin-2-one (**7-14**)

Yellow oil (35.9 mg, 89% yield, *Z/E* ≈ 1:2.8, 94% ee, 94% ee). (*Z*)&(*E*) Form:  $[\alpha]_D^{25} = +16.0$  ( $c = 0.15$  in MeOH),  $^1\text{H NMR}$  (500 MHz,  $\text{CDCl}_3$ )  $\delta = 8.92$  (s, 0.16H), 8.50 (dd,  $J = 8.6, 1.8$  Hz, 0.16H), 8.22 (s, 1H), 8.10 (s, 1H), 7.96 (d,  $J = 8.5$  Hz, 1.11H), 7.94 – 7.88 (m, 2.12H), 7.88 – 7.79 (m, 1.58H), 7.77 (d,  $J = 7.7$  Hz, 1H), 7.72 – 7.64 (m, 1.35H), 7.57 (dt,  $J = 6.2, 2.5$  Hz, 2H), 7.45 (dt,  $J = 8.0, 4.5$  Hz, 1.59H), 7.40 – 7.32 (m, 1.21H), 7.17 (t,  $J = 7.7$  Hz, 1.21H), 7.11 – 7.06 (m, 1.35H), 6.89 (t,  $J = 7.6$  Hz, 1H), 6.38 (d,  $J = 7.8$  Hz, 1.15H), 1.37 (s, 9H), 1.34 (s, 1.65H).  $^{13}\text{C NMR}$  (126 MHz,  $\text{CDCl}_3$ )  $\delta = 168.8, 161.6, 159.6, 149.6, 146.7, 133.1, 132.7, 132.4, 132.3, 131.8, 131.6, 131.5, 131.2, 130.4, 130.4, 130.1, 130.0, 130.0, 129.4, 129.3, 129.3, 129.1, 129.0, 127.9, 127.8, 124.0, 124.0, 123.1, 123.0, 122.9, 122.0, 121.0, 116.2, 116.1, 115.1, 110.8, 35.7, 31.7$ .

**HRMS (ESI)**: calcd for  $\text{C}_{29}\text{H}_{26}\text{NO}$   $[\text{M}+\text{H}]^+$  404.2009; found 404.2011.

The ee was determined by Daicel Chiralcel AD-H (0.46 cm x 25 cm), hexane/isopropanol = 90/10, 1 mL/min,  $\lambda = 254$  nm,  $t_R$  (minor) = 6.246/9.509 min,  $t_R$  (major) = 6.965/12.416 min.

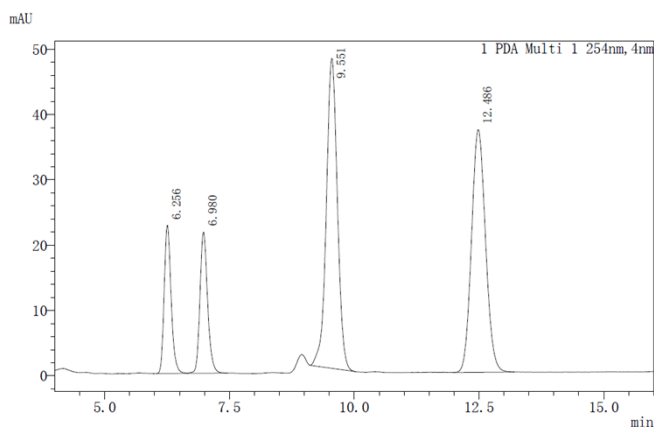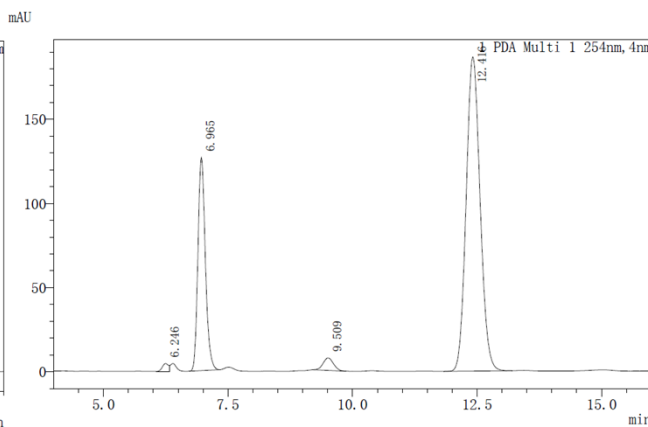

| PDA Ch1 254nm |           |              |                |             |                 |
|---------------|-----------|--------------|----------------|-------------|-----------------|
| NO.           | Ret. Time | Height (uAU) | Area (uAU*min) | Rel. Area % | Resolution(USP) |
| 1             | 6.256     | 22668        | 219524         | 11.508      | ---             |
| 2             | 6.980     | 21632        | 230471         | 12.082      | 2.633           |
| 3             | 9.551     | 47477        | 731494         | 38.347      | 7.417           |
| 4             | 12.486    | 37156        | 726052         | 38.062      | 6.321           |

| PDA Ch1 254nm |           |              |                |             |                 |
|---------------|-----------|--------------|----------------|-------------|-----------------|
| NO.           | Ret. Time | Height (uAU) | Area (uAU*min) | Rel. Area % | Resolution(USP) |
| 1             | 6.246     | 4615         | 40301          | 0.791       | ---             |
| 2             | 6.965     | 126476       | 1313017        | 25.783      | 2.186           |
| 3             | 9.509     | 7454         | 108918         | 2.139       | 7.503           |
| 4             | 12.416    | 186675       | 3630396        | 71.287      | 6.348           |

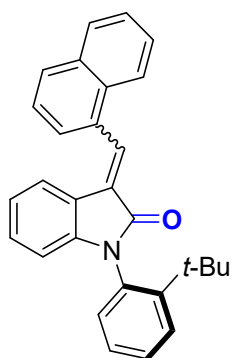

1-(2-(*tert*-butyl)phenyl)-3-(naphthalen-1-ylmethylene)indolin-2-one (**7-15**)

Yellow oil (14.9 mg, 37% yield, *Z/E*  $\approx$  1:4.9, 70% ee, 71% ee). (*Z*)&(*E*) Form:  $[\alpha]_D^{25} = +3.7$  ( $c = 0.43$  in MeOH),  $^1\text{H NMR}$  (500 MHz,  $\text{CDCl}_3$ )  $\delta = 8.4$  (d,  $J = 6.2$  Hz, 1.42H), 8.4 (s, 0.44H), 8.1 (d,  $J = 8.4$  Hz, 0.45H), 8.1 – 8.1 (m, 1H), 8.0 (dd,  $J = 12.9, 8.9$  Hz, 2H), 7.9 (t,  $J = 9.1$  Hz, 2H), 7.7 (d,  $J = 7.5$  Hz, 0.47H), 7.7 (dd,  $J = 8.1$  Hz, 1.5, 1H), 7.6 (dd,  $J = 8.2, 1.5$  Hz, 0.5H), 7.6 (td,  $J = 6.5, 5.9, 3.3$  Hz, 3.36H), 7.5 – 7.5 (m, 1H), 7.5 (td,  $J = 8.2, 7.7, 1.6$  Hz, 1.1H), 7.4 (dtd,  $J = 14.9, 7.3, 1.5$  Hz, 1.6H), 7.3 (td,  $J = 7.6, 1.5$  Hz, 0.53H), 7.2 (dd,  $J = 11.8, 7.7$  Hz, 1.7H), 7.2 – 7.1 (m, 2.47H), 7.1 (dd,  $J = 7.8, 1.5$  Hz, 0.47H), 6.8 (td,  $J = 7.6, 1.0$  Hz, 1H), 6.4 (d,  $J = 7.8$  Hz, 0.44H), 6.4 (d,  $J = 7.8$  Hz, 1H), 1.4 (s, 9H), 1.3 (s, 4H).  $^{13}\text{C NMR}$  (126 MHz,  $\text{CDCl}_3$ )  $\delta = 169.0, 167.1, 149.6, 149.6, 146.5, 144.8, 135.8, 134.2, 133.7, 133.5, 133.2, 132.3, 132.0, 131.4, 131.3, 131.2, 130.6, 130.0, 129.7, 129.7, 129.7, 129.4, 129.2, 129.0, 128.9, 128.9, 128.7, 127.9, 127.8, 127.4, 126.9, 126.9, 126.6, 126.5, 125.8, 125.2, 125.2, 124.9, 124.1, 123.9, 123.0, 122.0, 121.9, 121.3, 119.3, 110.8, 110.6, 35.8, 31.7$ .

**HRMS (ESI)**: calcd for  $\text{C}_{29}\text{H}_{26}\text{NO}$   $[\text{M}+\text{H}]^+$  404.2009; found 404.2006.

The ee was determined by Daicel Chiralcel OD-H (0.46 cm x 25 cm), hexane/isopropanol = 98/2, 1 mL/min,  $\lambda = 254$  nm,  $t_R$  (minor) = 21.924/26.103 min,  $t_R$  (major) = 13.804/17.943 min.

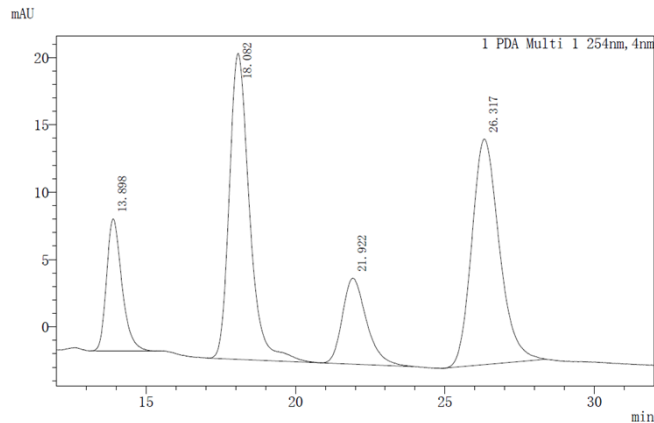

| PDA Ch1 254nm |           |              |                |             |                  |
|---------------|-----------|--------------|----------------|-------------|------------------|
| NO.           | Ret. Time | Height (uAU) | Area (uAU*min) | Rel. Area % | Resolution (USP) |
| 1             | 13.898    | 9807         | 350465         | 12.310      | --               |
| 2             | 18.082    | 22723        | 1064150        | 37.379      | 3.978            |
| 3             | 21.922    | 6391         | 358799         | 12.603      | 2.920            |
| 4             | 26.317    | 16753        | 1073514        | 37.708      | 2.828            |

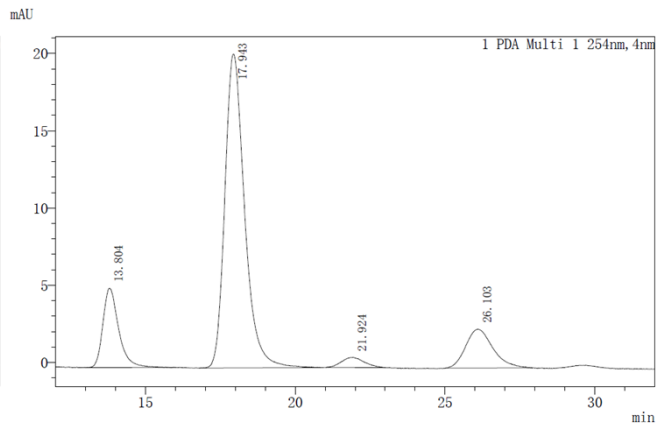

| PDA Ch1 254nm |           |              |                |             |                  |
|---------------|-----------|--------------|----------------|-------------|------------------|
| NO.           | Ret. Time | Height (uAU) | Area (uAU*min) | Rel. Area % | Resolution (USP) |
| 1             | 13.804    | 5141         | 188125         | 14.336      | --               |
| 2             | 17.943    | 20319        | 931390         | 70.976      | 3.974            |
| 3             | 21.924    | 648          | 34173          | 2.604       | 3.159            |
| 4             | 26.103    | 2515         | 158563         | 12.083      | 2.772            |

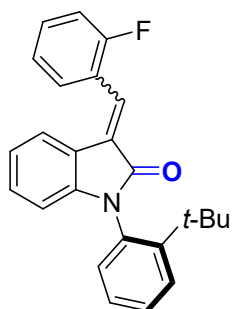

1-(2-(*tert*-butyl)phenyl)-3-(2-fluorobenzylidene)indolin-2-one (**7-16**)

Yellow oil (34.9 mg, 94% yield, *Z/E* ≈ 1:8.9, 86% ee, 85% ee). (*E*) Form:  $[\alpha]_D^{25} = +13.3$  ( $c = 0.12$  in MeOH),  $^1\text{H NMR}$  (500 MHz,  $\text{CDCl}_3$ )  $\delta = 7.91$  (s, 1H), 7.78 (td,  $J = 7.5$  Hz, 1.7, 1H), 7.67 (dd,  $J = 8.2, 1.5$  Hz, 1H), 7.51 (d,  $J = 7.7$  Hz, 1H), 7.44 (ddd,  $J = 12.5, 6.3, 2.0$  Hz, 2H), 7.34 (td,  $J = 7.5, 1.5$  Hz, 1H), 7.30 – 7.24 (m, 1H), 7.21 (t,  $J = 9.1$  Hz, 1H), 7.17 (t,  $J = 7.7$  Hz, 1H), 7.06 (dd,  $J = 7.7$  Hz, 1.6, 1H), 6.89 (t,  $J = 7.6$  Hz, 1H), 6.35 (d,  $J = 7.8$  Hz, 1H), 1.35 (s, 9H).  $^{13}\text{C NMR}$  (126 MHz,  $\text{CDCl}_3$ )  $\delta = 169.5, 148.1$  (d,  $J = 386.7$  Hz), 137.9, 133.8, 133.2 (d,  $J = 13.7$  Hz), 132.5, 131.2, 129.8, 129.4, 129.4, 129.0, 128.4, 128.3, 127.9 (d,  $J = 4.6$  Hz), 127.4, 127.2, 126.7, 126.5, 122.3 (d,  $J = 84.2$  Hz), 121.3, 110.9, 35.7, 31.7.  $^{19}\text{F NMR}$  (471 MHz,  $\text{CDCl}_3$ )  $\delta = -110.5$ .

**HRMS (ESI):** calcd for  $\text{C}_{25}\text{H}_{23}\text{FNO}$   $[\text{M}+\text{H}]^+$  372.1758; found 372.1757.

The ee was determined by Daicel Chiralcel OD-H (0.46 cm x 25 cm), hexane/isopropanol = 99.5/0.5, 1 mL/min,  $\lambda = 254$  nm,  $t_R$  (minor) = 13.194/25.110 min,  $t_R$  (major) = 7.967/22.852 min.

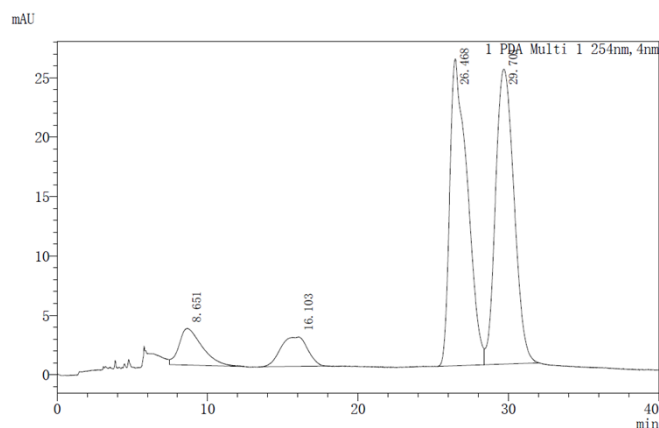

| PDA Ch1 254nm |           |              |                |             |                 |
|---------------|-----------|--------------|----------------|-------------|-----------------|
| NO.           | Ret. Time | Height (uAU) | Area (uAU*min) | Rel. Area % | Resolution(USP) |
| 1             | 8.651     | 3084         | 327718         | 6.741       | --              |
| 2             | 16.103    | 2476         | 308163         | 6.339       | 2.570           |
| 3             | 26.468    | 25838        | 2099645        | 43.188      | 3.902           |
| 4             | 29.701    | 24837        | 2126099        | 43.732      | 1.435           |

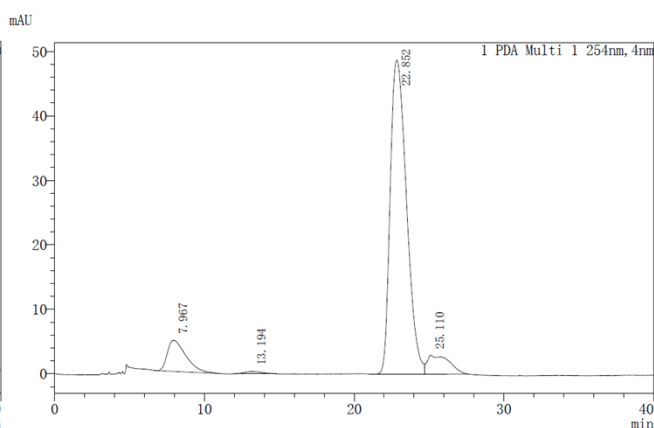

| PDA Ch1 254nm |           |              |                |             |                 |
|---------------|-----------|--------------|----------------|-------------|-----------------|
| NO.           | Ret. Time | Height (uAU) | Area (uAU*min) | Rel. Area % | Resolution(USP) |
| 1             | 7.967     | 4853         | 417120         | 9.407       | --              |
| 2             | 13.194    | 373          | 31275          | 0.705       | 2.340           |
| 3             | 22.852    | 48738        | 3690031        | 83.220      | 4.604           |
| 4             | 25.110    | 2939         | 295627         | 6.667       | 0.983           |

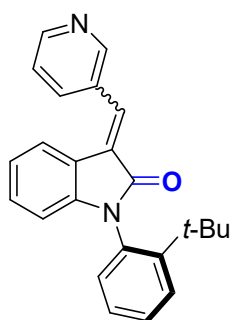

1-(2-(*tert*-butyl)phenyl)-3-(pyridin-3-ylmethylene)indolin-2-one (**7-17**)

Dark yellow solid (34.3 mg, 97% yield, *Z/E*  $\approx$  1:1.8, 78% ee, 79% ee). (*Z*)&(*E*) Form:  $[\alpha]_D^{25} = +90.0$  ( $c = 0.22$  in MeOH),  $^1\text{H NMR}$  (500 MHz,  $\text{CDCl}_3$ )  $\delta = 9.22$  (dt,  $J = 8.2, 1.9$  Hz, 0.44H), 8.98 (s, 1.38H), 8.83 – 8.64 (m, 1H), 8.59 (s, 0.44H), 8.09 – 7.95 (m, 1H), 7.84 (s, 1H), 7.69 – 7.61 (m, 2H), 7.58 (dd,  $J = 9.1, 2.1$  Hz, 1.44H), 7.44 (tdd,  $J = 8.1, 6.3, 1.6$  Hz, 2.41H), 7.37 – 7.30 (m, 1.90H), 7.24 – 7.14 (m, 1.49H), 7.09 (td,  $J = 7.5, 1.0$  Hz, 0.48H), 7.05 (dd,  $J = 7.7, 1.7$  Hz, 1.40H), 6.90 (td,  $J = 7.7, 1.1$  Hz, 1H), 6.37 (dd,  $J = 7.9, 5.6$  Hz, 1.42H), 1.34 (s, 9H), 1.31 (s, 4.54H).  $^{13}\text{C NMR}$  (126 MHz,  $\text{CDCl}_3$ )  $\delta = 168.8, 167.1, 152.9, 150.6, 150.2, 150.0, 149.6, 149.5, 146.8, 144.9, 138.4, 136.4, 133.2, 133.1, 132.9, 132.8, 131.1, 131.1, 130.5, 129.6, 129.5, 129.4, 129.2, 129.0, 128.5, 128.0, 127.9, 123.9, 123.5, 123.2, 122.5, 122.2, 122.2, 120.7, 119.3, 111.1, 110.7, 35.7, 35.7, 31.7, 31.7$ .

**HRMS (ESI)**: calcd for  $\text{C}_{24}\text{H}_{23}\text{N}_2\text{O}$   $[\text{M}+\text{H}]^+$  355.1805; found 355.1803.

The ee was determined by Daicel Chiralcel AD-H (0.46 cm x 25 cm), hexane/isopropanol = 90/10, 1 mL/min,  $\lambda = 254$  nm,  $t_R$  (minor) = 9.483/13.517 min,  $t_R$  (major) = 8.081/14.246 min.

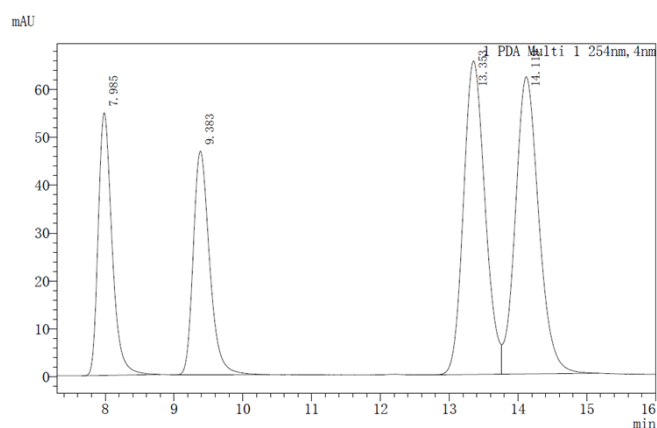

| PDA Ch1 254nm |           |              |                |             |                 |
|---------------|-----------|--------------|----------------|-------------|-----------------|
| NO.           | Ret. Time | Height (uAU) | Area (uAU*min) | Rel. Area % | Resolution(USP) |
| 1             | 7.985     | 54826        | 764291         | 17.248      | ---             |
| 2             | 9.383     | 46712        | 770128         | 17.380      | 3.514           |
| 3             | 13.353    | 65461        | 1428206        | 32.231      | 7.827           |
| 4             | 14.119    | 62029        | 1468563        | 33.142      | 1.273           |

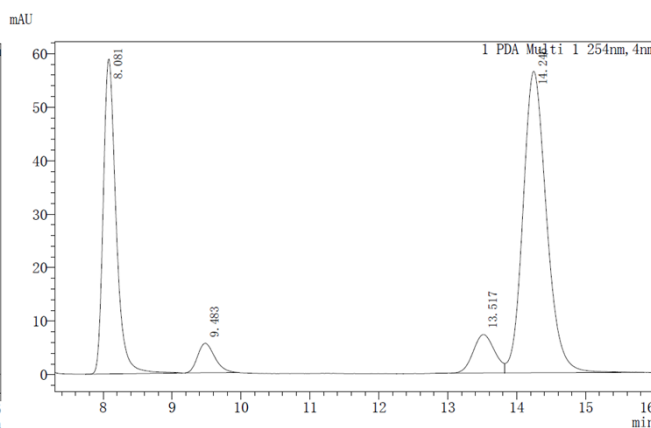

| PDA Ch1 254nm |           |              |                |             |                 |
|---------------|-----------|--------------|----------------|-------------|-----------------|
| NO.           | Ret. Time | Height (uAU) | Area (uAU*min) | Rel. Area % | Resolution(USP) |
| 1             | 8.081     | 58867        | 757453         | 32.333      | ---             |
| 2             | 9.483     | 5501         | 94928          | 4.052       | 3.515           |
| 3             | 13.517    | 7172         | 155212         | 6.625       | 7.631           |
| 4             | 14.246    | 56343        | 1335056        | 56.989      | 1.203           |

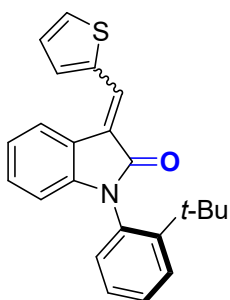

1-(2-(*tert*-butyl)phenyl)-3-(thiophen-2-ylmethylene)indolin-2-one (**7-18**)

Yellow oil (32.0 mg, 89% yield, *Z/E*  $\approx$  1.3/1, 90% ee, 90% ee). (*Z*)&(*E*) Form:  $[\alpha]_D^{25} = +56.5$  ( $c = 0.23$  in MeOH),  $^1\text{H NMR}$  (500 MHz,  $\text{CDCl}_3$ )  $\delta = 8.32$  (d,  $J = 7.7$  Hz, 1H), 8.03 (s, 1H), 7.90 (d,  $J = 4.0$  Hz, 0.41H), 7.82 (s, 0.42H), 7.71 – 7.56 (m, 4.27H), 7.43 (tdd,  $J = 7.7, 6.0, 1.5$  Hz, 1.46H), 7.38 – 7.29 (m, 1.46H), 7.24 – 7.12 (m, 2.90H), 7.11 – 7.00 (m, 2.89H), 6.48 – 6.31 (m, 1.41H), 1.32 (s, 9H), 1.30 (s, 3.76H).  $^{13}\text{C NMR}$  (126 MHz,  $\text{CDCl}_3$ )  $\delta = 170.1, 167.4, 149.7, 149.6, 146.2, 144.3, 138.0, 137.9, 137.0, 134.7, 133.7, 133.2, 133.1, 131.4, 131.2, 130.5, 129.5, 129.4, 129.3, 129.0, 129.0, 128.9, 128.5, 128.4, 128.1, 127.9, 127.8, 127.4, 124.0, 123.6, 123.3, 122.0, 121.8, 121.4, 121.1, 118.6, 110.8, 110.5, 35.7, 35.7, 31.7, 31.6$ .

**HRMS (ESI)**: calcd for  $\text{C}_{23}\text{H}_{22}\text{NOS}$   $[\text{M}+\text{H}]^+$  360.1417; found 360.1413.

The ee was determined by Daicel Chiralcel AD-H (0.46 cm x 25 cm), hexane/isopropanol = 98/2, 1 mL/min,  $\lambda = 254$  nm,  $t_R$  (minor) = 14.518/55.552 min,  $t_R$  (major) = 15.584/46.482 min.

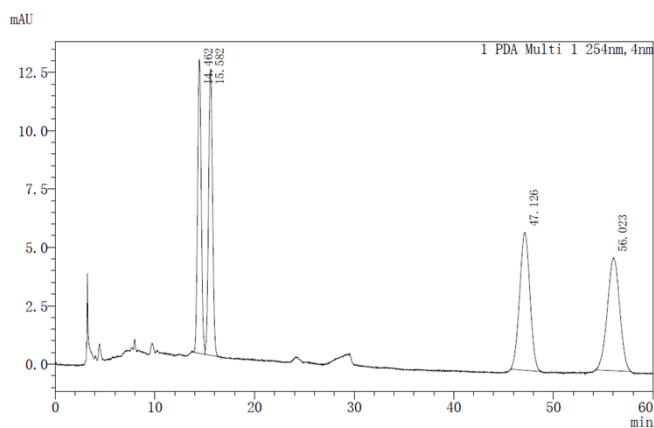

| PDA Ch1 254nm |           |              |                |             |                  |
|---------------|-----------|--------------|----------------|-------------|------------------|
| NO.           | Ret. Time | Height (uAU) | Area (uAU*min) | Rel. Area % | Resolution (USP) |
| 1             | 14.462    | 12616        | 321246         | 21.361      | —                |
| 2             | 15.582    | 12258        | 340430         | 22.636      | 1.576            |
| 3             | 47.126    | 5895         | 425116         | 28.267      | 23.735           |
| 4             | 56.023    | 4836         | 417113         | 27.735      | 4.238            |

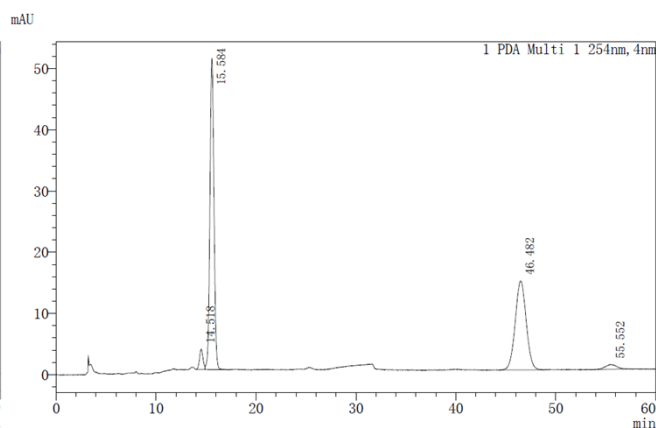

| PDA Ch1 254nm |           |              |                |             |                  |
|---------------|-----------|--------------|----------------|-------------|------------------|
| NO.           | Ret. Time | Height (uAU) | Area (uAU*min) | Rel. Area % | Resolution (USP) |
| 1             | 14.518    | 3299         | 79906          | 2.986       | —                |
| 2             | 15.584    | 50713        | 1430098        | 53.440      | 1.531            |
| 3             | 46.482    | 14539        | 1105596        | 41.314      | 22.526           |
| 4             | 55.552    | 763          | 60500          | 2.261       | 4.442            |



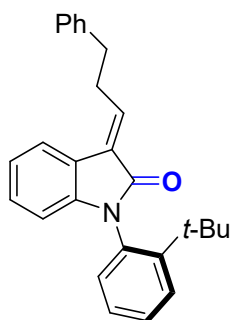

**(E)-1-(2-(tert-butyl)phenyl)-3-(3-phenylpropylidene)indolin-2-one (7-19)**

Brown oil (25.2 mg, 66% yield, *E/Z* > 10:1, 94% ee). (*E*) Form:  $[\alpha]_D^{25} = +31.5$  ( $c = 0.26$  in MeOH),  $^1\text{H NMR}$  (500 MHz,  $\text{CDCl}_3$ )  $\delta$  7.65 (d,  $J = 7.9$  Hz, 1H), 7.58 (d,  $J = 7.5$  Hz, 1H), 7.42 (t,  $J = 7.3$  Hz, 1H), 7.38 – 7.28 (m, 5H), 7.24 (d,  $J = 7.1$  Hz, 1H), 7.17 (td,  $J = 7.3, 4.0$  Hz, 2H), 7.03 (dd,  $J = 14.1, 7.1$  Hz, 2H), 6.35 (d,  $J = 7.8$  Hz, 1H), 3.07 (dd,  $J = 14.6, 7.0$  Hz, 2H), 3.04 – 2.94 (m, 2H), 1.31 (s, 9H).  $^{13}\text{C NMR}$  (126 MHz,  $\text{CDCl}_3$ )  $\delta$  168.6, 149.6, 145.9, 141.2, 140.7, 133.1, 131.2, 129.3, 128.9, 128.9, 128.6, 128.4, 128.1, 127.8, 126.4, 123.4, 122.2, 122.1, 110.7, 35.7, 34.7, 31.7, 31.3.

**HRMS (ESI):** calcd for  $\text{C}_{27}\text{H}_{28}\text{NO}$   $[\text{M}+\text{H}]^+$  382.2165; found 382.2163.

The ee was determined by Daicel Chiralcel AD-H (0.46 cm x 25 cm), hexane/isopropanol = 90/10, 1 mL/min,  $\lambda = 254$  nm,  $t_R$  (minor) = 7.442 min,  $t_R$  (major) = 8.613 min.

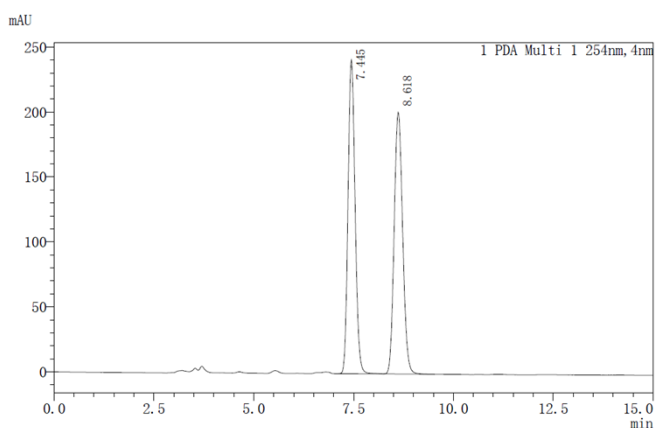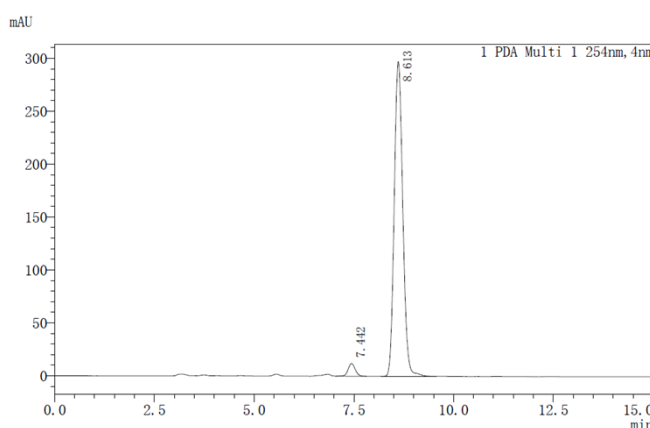

| PDA Ch1 254nm |           |              |                |             |                 |
|---------------|-----------|--------------|----------------|-------------|-----------------|
| NO.           | Ret. Time | Height (uAU) | Area (uAU*min) | Rel. Area % | Resolution(USP) |
| 1             | 7.445     | 241464       | 2972243        | 50.008      | --              |
| 2             | 8.618     | 201417       | 2971247        | 49.992      | 3.207           |

| PDA Ch1 254nm |           |              |                |             |                 |
|---------------|-----------|--------------|----------------|-------------|-----------------|
| NO.           | Ret. Time | Height (uAU) | Area (uAU*min) | Rel. Area % | Resolution(USP) |
| 1             | 7.442     | 11936        | 146097         | 3.199       | --              |
| 2             | 8.613     | 297434       | 4420852        | 96.801      | 3.207           |

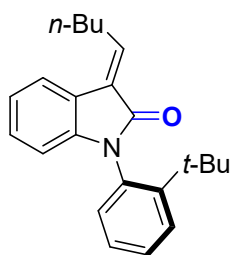

**(E)-1-(2-(*tert*-butyl)phenyl)-3-pentylideneindolin-2-one (7-20)**

Pale yellow oil (16.0 mg, 48% yield, *E/Z* > 10:1, 90% ee). (*E*) Form:  $[\alpha]_D^{25} = +24.7$  ( $c = 0.3$  in MeOH),  $^1\text{H NMR}$  (500 MHz,  $\text{CDCl}_3$ )  $\delta$  7.68 – 7.58 (m, 2H), 7.45 – 7.38 (m, 1H), 7.31 (td,  $J = 7.6, 1.3$  Hz, 1H), 7.15 (dt,  $J = 13.6, 7.7$  Hz, 2H), 7.05 (t,  $J = 7.6$  Hz, 1H), 7.01 (dd,  $J = 7.7, 1.3$  Hz, 1H), 6.34 (d,  $J = 7.8$  Hz, 1H), 2.74 (q,  $J = 7.5$  Hz, 2H), 1.71 – 1.63 (m, 2H), 1.50 (dq,  $J = 14.6, 7.3$  Hz, 2H), 1.29 (s, 9H), 0.99 (t,  $J = 7.3$  Hz, 3H).  $^{13}\text{C NMR}$  (126 MHz,  $\text{CDCl}_3$ )  $\delta$  168.8, 149.6, 145.8, 143.1, 133.2, 131.3, 129.3, 128.9, 128.6, 127.8, 127.6, 123.3, 122.4, 122.1, 110.6, 35.7, 31.6, 30.7, 29.2, 22.6, 13.9.

**HRMS (ESI):** calcd for  $\text{C}_{23}\text{H}_{28}\text{NO}$   $[\text{M}+\text{H}]^+$  334.2165; found 334.2165.

The ee was determined by Daicel Chiralcel OD-H (0.46 cm x 25 cm), hexane/isopropanol = 98/2, 1 mL/min,  $\lambda = 254$  nm,  $t_R$  (minor) = 10.241 min,  $t_R$  (major) = 9.607 min.

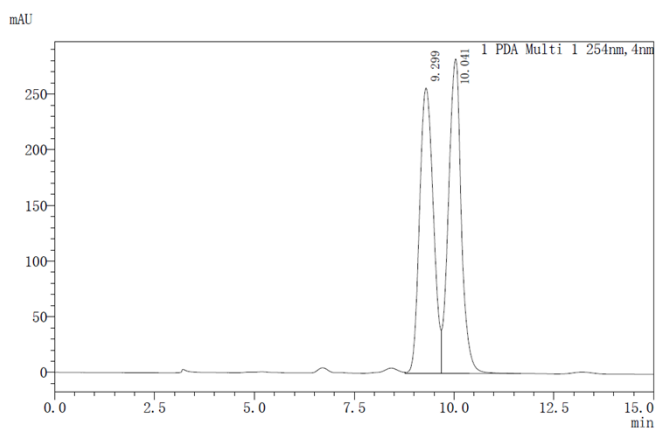

| PDA Ch1 254nm |           |              |                |             |                 |
|---------------|-----------|--------------|----------------|-------------|-----------------|
| NO.           | Ret. Time | Height (uAU) | Area (uAU*min) | Rel. Area % | Resolution(USP) |
| 1             | 9.299     | 256438       | 6168597        | 49.526      | ---             |
| 2             | 10.041    | 282554       | 6286695        | 50.474      | 1.230           |

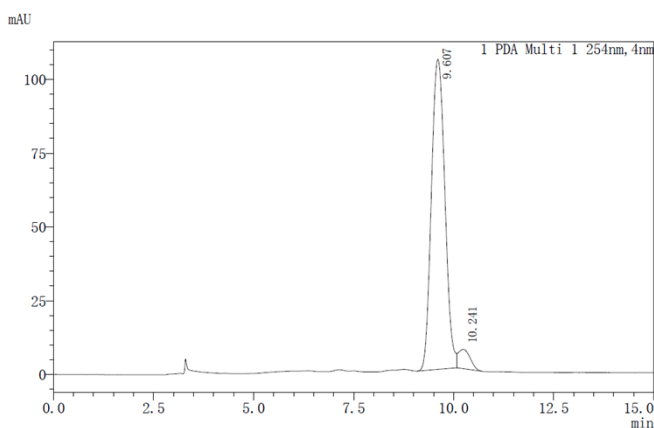

| PDA Ch1 254nm |           |              |                |             |                 |
|---------------|-----------|--------------|----------------|-------------|-----------------|
| NO.           | Ret. Time | Height (uAU) | Area (uAU*min) | Rel. Area % | Resolution(USP) |
| 1             | 9.607     | 105145       | 2467511        | 94.854      | ---             |
| 2             | 10.241    | 6565         | 133867         | 5.146       | 0.875           |

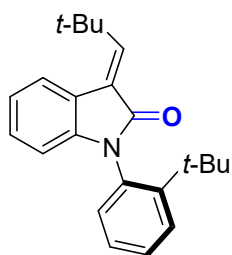

**(E)-1-(2-(tert-butyl)phenyl)-3-(2,2-dimethylpropylidene)indolin-2-one (7-21)**

Pale yellow oil (12.0 mg, 36% yield, *E/Z* > 15:1, 96% ee). (*E*) Form:  $[\alpha]_D^{25} = +18.7$  ( $c = 0.46$  in MeOH),  $^1\text{H NMR}$  (500 MHz,  $\text{CDCl}_3$ )  $\delta$  7.75 (d,  $J = 7.7$  Hz, 1H), 7.64 (d,  $J = 8.1$  Hz, 1H), 7.42 (t,  $J = 7.7$  Hz, 1H), 7.35 – 7.27 (m, 2H), 7.16 (t,  $J = 7.7$  Hz, 1H), 7.06 (t,  $J = 7.6$  Hz, 1H), 7.00 (d,  $J = 7.7$  Hz, 1H), 6.34 (d,  $J = 7.8$  Hz, 1H), 1.44 (s, 9H), 1.30 (s, 9H).  $^{13}\text{C NMR}$  (126 MHz,  $\text{CDCl}_3$ )  $\delta$  169.9, 153.8, 149.5, 146.5, 133.3, 131.2, 129.3, 128.9, 128.7, 127.9, 126.5, 126.2, 121.8, 120.7, 110.9, 35.7, 32.9, 31.6, 29.3.

**HRMS (ESI):** calcd for  $\text{C}_{23}\text{H}_{28}\text{NO}$   $[\text{M}+\text{H}]^+$  334.2165; found 334.2163.

The ee was determined by Daicel Chiralcel OD-H (0.46 cm x 25 cm), hexane/isopropanol = 99/1, 1 mL/min,  $\lambda = 254$  nm,  $t_R$  (minor) = 23.648 min,  $t_R$  (major) = 16.541 min.

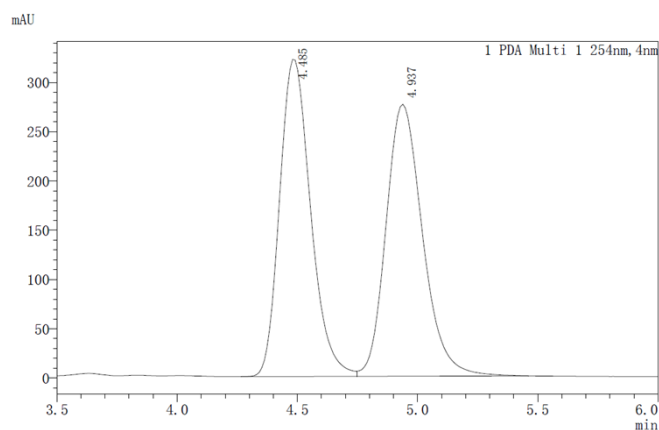

| PDA Ch1 254nm |           |              |                |             |                  |
|---------------|-----------|--------------|----------------|-------------|------------------|
| NO.           | Ret. Time | Height (uAU) | Area (uAU*min) | Rel. Area % | Resolution (USP) |
| 1             | 4.485     | 321953       | 2891689        | 49.761      | --               |
| 2             | 4.937     | 276153       | 2919459        | 50.239      | 1.698            |

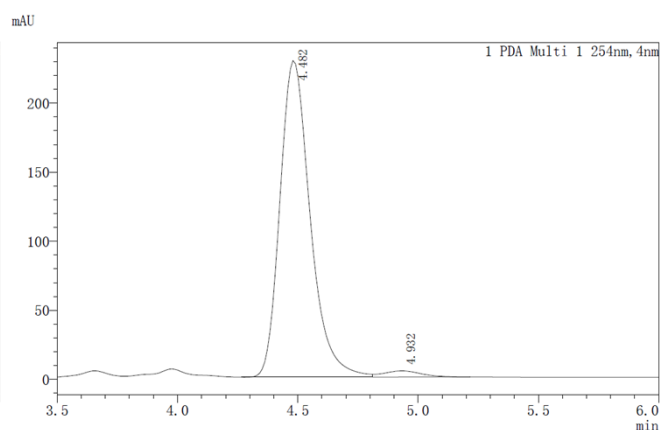

| PDA Ch1 254nm |           |              |                |             |                  |
|---------------|-----------|--------------|----------------|-------------|------------------|
| NO.           | Ret. Time | Height (uAU) | Area (uAU*min) | Rel. Area % | Resolution (USP) |
| 1             | 4.482     | 229254       | 2004412        | 97.677      | --               |
| 2             | 4.932     | 4447         | 47662          | 2.323       | 1.585            |

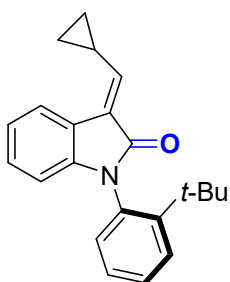

**(E)-1-(2-(*tert*-butyl)phenyl)-3-(cyclopropylmethylene)indolin-2-one (7-22)**

Pale yellow oil (16.2 mg, 51% yield, *E/Z* > 10:1, 95% ee). (*E*) Form:  $[\alpha]_D^{25} = +44.3$  ( $c = 0.23$  in MeOH),  $^1\text{H NMR}$  (500 MHz,  $\text{CDCl}_3$ )  $\delta$  7.75 (d,  $J = 7.5$  Hz, 1H), 7.64 (d,  $J = 8.1$  Hz, 1H), 7.41 (t,  $J = 7.7$  Hz, 1H), 7.31 (t,  $J = 7.5$  Hz, 1H), 7.15 (t,  $J = 7.7$  Hz, 1H), 7.05 (t,  $J = 7.6$  Hz, 1H), 7.00 (d,  $J = 7.7$  Hz, 1H), 6.50 (d,  $J = 11.3$  Hz, 1H), 6.35 (d,  $J = 7.8$  Hz, 1H), 2.36 – 2.29 (m, 1H), 1.30 (s, 9H), 1.26 (d,  $J = 8.2$  Hz, 2H), 0.93 (d,  $J = 2.2$  Hz, 2H).  $^{13}\text{C NMR}$  (126 MHz,  $\text{CDCl}_3$ )  $\delta$  168.8, 149.6, 147.9, 145.3, 133.3, 131.3, 129.2, 128.9, 128.2, 127.8, 125.6, 122.6, 122.3, 122.0, 110.6, 35.7, 31.6, 13.4, 10.5, 10.3.

**HRMS (ESI):** calcd for  $\text{C}_{22}\text{H}_{24}\text{NO}$   $[\text{M}+\text{H}]^+$  318.1852; found 318.1852.

The ee was determined by Daicel Chiralcel AD-H (0.46 cm x 25 cm), hexane/isopropanol = 90/10, 1 mL/min,  $\lambda = 254$  nm,  $t_R$  (minor) = 8.580 min,  $t_R$  (major) = 9.893 min.

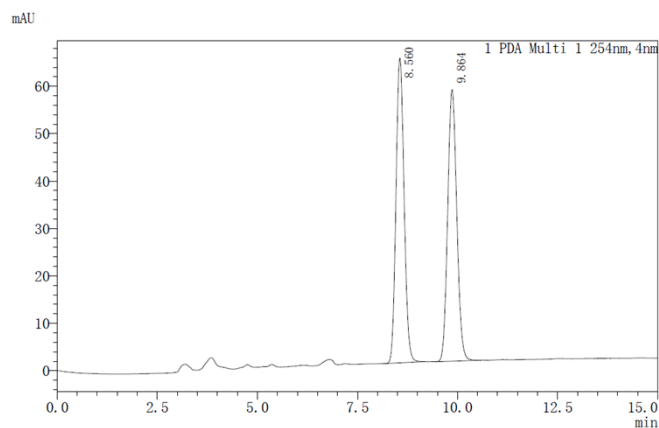

| PDA Ch1 254nm |           |              |                |             |                 |
|---------------|-----------|--------------|----------------|-------------|-----------------|
| NO.           | Ret. Time | Height (uAU) | Area (uAU*min) | Rel. Area % | Resolution(USP) |
| 1             | 8.560     | 64263        | 903004         | 49.950      | ---             |
| 2             | 9.864     | 57265        | 904803         | 50.050      | 3.240           |

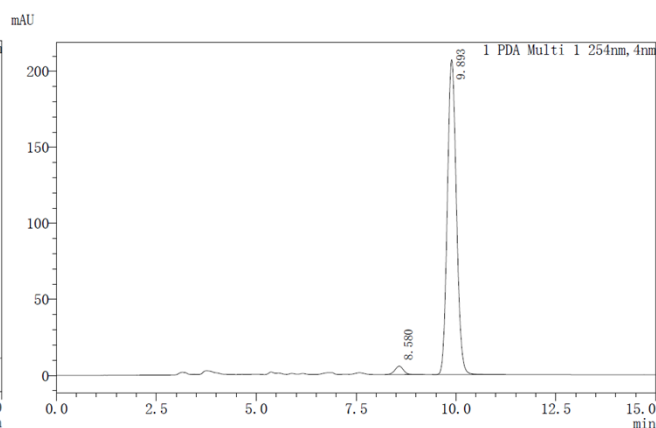

| PDA Ch1 254nm |           |              |                |             |                 |
|---------------|-----------|--------------|----------------|-------------|-----------------|
| NO.           | Ret. Time | Height (uAU) | Area (uAU*min) | Rel. Area % | Resolution(USP) |
| 1             | 8.580     | 5529         | 82205          | 2.458       | ---             |
| 2             | 9.893     | 207073       | 3262717        | 97.542      | 3.193           |

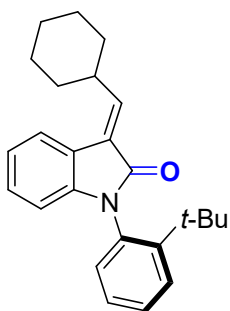

**(E)-1-(2-(tert-butyl)phenyl)-3-(cyclohexylmethylene)indolin-2-one (7-23)**

Pale yellow solid (20.1 mg, 56% yield, *E/Z* > 15:1, 94% ee). (*E*) Form:  $[\alpha]_D^{25} = +15.0$  ( $c = 0.32$  in MeOH),  $^1\text{H NMR}$  (500 MHz,  $\text{CDCl}_3$ )  $\delta$  7.64 (d,  $J = 8.1$  Hz, 1H), 7.57 (d,  $J = 7.5$  Hz, 1H), 7.41 (t,  $J = 7.7$  Hz, 1H), 7.31 (t,  $J = 7.5$  Hz, 1H), 7.16 (t,  $J = 7.7$  Hz, 1H), 7.05 (t,  $J = 7.6$  Hz, 1H), 7.00 (d,  $J = 9.6$  Hz, 2H), 6.34 (d,  $J = 7.8$  Hz, 1H), 3.00 (dt,  $J = 13.6, 6.8$  Hz, 1H), 1.96 – 1.89 (m, 2H), 1.86 (d,  $J = 12.9$  Hz, 2H), 1.77 (d,  $J = 12.8$  Hz, 1H), 1.48 – 1.31 (m, 5H), 1.30 (s, 9H).  $^{13}\text{C NMR}$  (126 MHz,  $\text{CDCl}_3$ )  $\delta$  169.2, 149.6, 147.7, 145.8, 133.3, 131.2, 129.3, 128.9, 128.6, 127.8, 126.0, 123.2, 122.1, 122.1, 110.7, 38.4, 35.7, 31.9, 31.6, 31.5, 25.8, 25.7, 25.5.

**HRMS (ESI):** calcd for  $\text{C}_{25}\text{H}_{30}\text{NO}$   $[\text{M}+\text{H}]^+$  360.2322; found 360.2320.

The ee was determined by Daicel Chiralcel AD-H (0.46 cm x 25 cm), hexane/isopropanol = 98/2, 1 mL/min,  $\lambda = 254$  nm,  $t_R$  (minor) = 11.253 min,  $t_R$  (major) = 17.674 min.

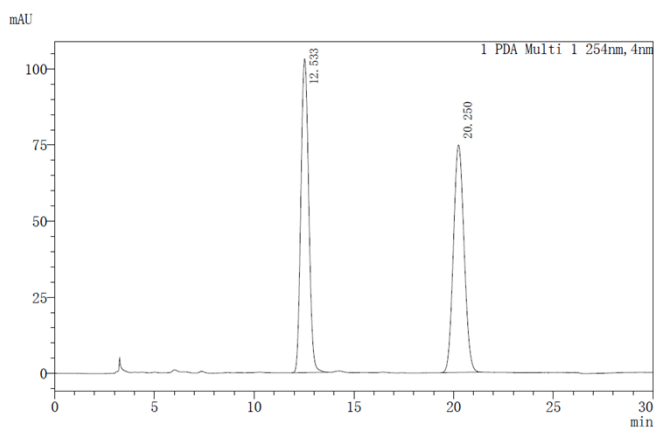

| PDA Ch1 254nm |           |              |                |             |                  |
|---------------|-----------|--------------|----------------|-------------|------------------|
| NO.           | Ret. Time | Height (uAU) | Area (uAU*min) | Rel. Area % | Resolution (USP) |
| 1             | 12.533    | 103095       | 2811880        | 50.219      | —                |
| 2             | 20.250    | 74778        | 2787357        | 49.781      | 9.009            |

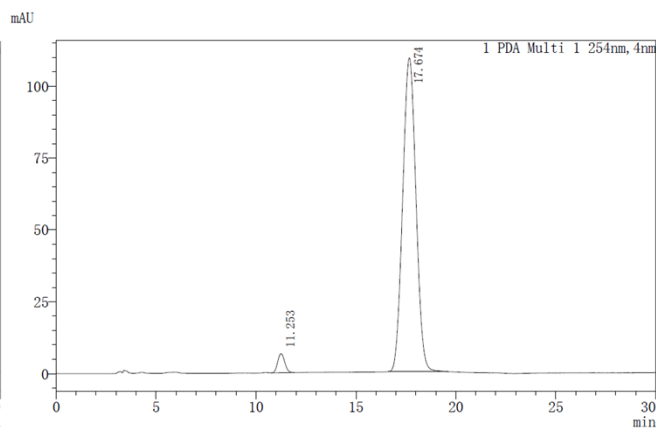

| PDA Ch1 254nm |           |              |                |             |                  |
|---------------|-----------|--------------|----------------|-------------|------------------|
| NO.           | Ret. Time | Height (uAU) | Area (uAU*min) | Rel. Area % | Resolution (USP) |
| 1             | 11.253    | 6673         | 163418         | 3.135       | —                |
| 2             | 17.674    | 109224       | 5048855        | 96.865      | 6.795            |

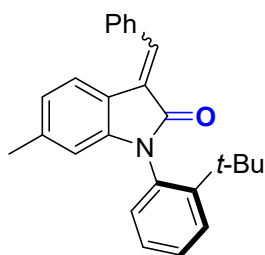

**3-benzylidene-1-(2-(*tert*-butyl)phenyl)-6-methylindolin-2-one (7-24)**

Yellow oil (34.1 mg, 93% yield, *Z/E* ≈ 1:4.4, 96% ee, 96% ee). (*Z*) Form:  $[\alpha]_D^{25} = +9.6$  (*c* = 0.25 in MeOH),  $^1\text{H NMR}$  (500 MHz,  $\text{CDCl}_3$ )  $\delta$  8.33 (d, *J* = 6.9 Hz, 2H), 7.66 (d, *J* = 8.0 Hz, 1H), 7.56 (s, 1H), 7.49 (d, *J* = 7.7 Hz, 1H), 7.45 – 7.38 (m, 4H), 7.33 (s, 1H), 7.05 (d, *J* = 7.5 Hz, 1H), 6.88 (d, *J* = 7.7 Hz, 1H), 6.17 (s, 1H), 2.30 (s, 3H), 1.32 (s, 9H).  $^{13}\text{C NMR}$  (126 MHz,  $\text{CDCl}_3$ )  $\delta$  167.5, 149.6, 144.7, 139.4, 136.5, 134.0, 133.3, 132.1, 131.3, 130.3, 129.2, 128.9, 128.2, 127.8, 126.2, 122.7, 122.1, 118.8, 111.1, 35.8, 31.7, 21.9. (*E*) Form:  $[\alpha]_D^{25} = +8.6$  (*c* = 0.35 in MeOH),  $^1\text{H NMR}$  (500 MHz,  $\text{CDCl}_3$ )  $\delta$  7.86 (s, 1H), 7.72 (d, *J* = 7.5 Hz, 2H), 7.68 (d, *J* = 7.5 Hz, 1H), 7.60 (d, *J* = 7.9 Hz, 1H), 7.49 (t, *J* = 7.4 Hz, 2H), 7.46 – 7.41 (m, 2H), 7.37 – 7.32 (m, 1H), 7.06 (d, *J* = 7.7 Hz, 1H), 6.71 (d, *J* = 7.9 Hz, 1H), 6.16 (s, 1H), 2.25 (s, 3H), 1.35 (s, 9H).  $^{13}\text{C NMR}$  (126 MHz,  $\text{CDCl}_3$ )  $\delta$  169.8, 149.6, 146.7, 140.4, 136.5, 135.2, 133.3, 131.3, 129.4, 129.4, 129.3, 129.0, 128.6, 127.9, 127.3, 122.6, 122.5, 118.7, 111.5, 35.7, 31.7, 21.9.

**HRMS (ESI):** calcd for  $\text{C}_{26}\text{H}_{26}\text{NO}$   $[\text{M}+\text{H}]^+$  368.2009; found 368.2005.

The ee was determined by Daicel Chiralcel OD-H (0.46 cm x 25 cm), hexane/isopropanol = 98/2, 1 mL/min,  $\lambda = 254$  nm,  $t_R$  (minor) = 7.728/12.860 min,  $t_R$  (major) = 6.372/10.842 min.

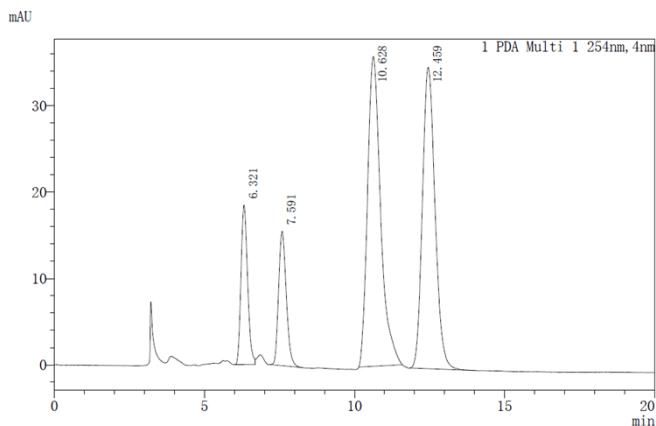

| PDA Ch1 254nm |           |              |                |             |                  |
|---------------|-----------|--------------|----------------|-------------|------------------|
| NO.           | Ret. Time | Height (uAU) | Area (uAU*min) | Rel. Area % | Resolution (USP) |
| 1             | 6.321     | 18461        | 282022         | 10.586      | --               |
| 2             | 7.591     | 15551        | 276519         | 10.379      | 2.888            |
| 3             | 10.628    | 35848        | 1087043        | 40.802      | 4.874            |
| 4             | 12.459    | 34890        | 1018612        | 38.233      | 2.373            |

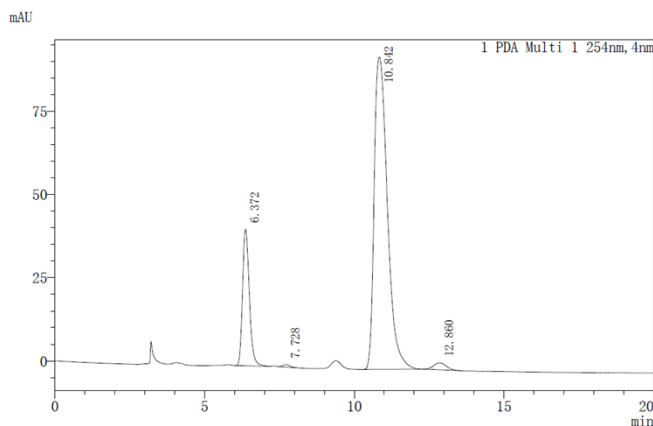

| PDA Ch1 254nm |           |              |                |             |                  |
|---------------|-----------|--------------|----------------|-------------|------------------|
| NO.           | Ret. Time | Height (uAU) | Area (uAU*min) | Rel. Area % | Resolution (USP) |
| 1             | 6.372     | 41065        | 649655         | 18.040      | --               |
| 2             | 7.728     | 777          | 12736          | 0.354       | 3.111            |
| 3             | 10.842    | 93880        | 2877434        | 79.901      | 5.107            |
| 4             | 12.860    | 2097         | 61443          | 1.706       | 2.600            |

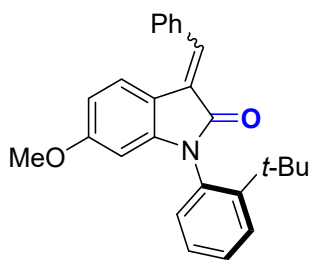

3-benzylidene-1-(2-(*tert*-butyl)phenyl)-6-methoxyindolin-2-one (**7-25**)

Yellow oil (38.0 mg, 99% yield, *Z/E* ≈ 1:8, 97% ee, 97% ee). (*Z*) Form:  $[\alpha]_D^{25} = +32.5$  (*c* = 0.08 in MeOH),  $^1\text{H NMR}$  (500 MHz,  $\text{CDCl}_3$ )  $\delta$  8.29 (d, *J* = 7.3 Hz, 2H), 7.65 (d, *J* = 8.2 Hz, 1H), 7.51 (d, *J* = 8.4 Hz, 1H), 7.46 (s, 1H), 7.40 (dt, *J* = 10.4, 6.9 Hz, 4H), 7.32 (t, *J* = 7.5 Hz, 1H), 7.05 (d, *J* = 7.6 Hz, 1H), 6.60 (dd, *J* = 8.4, 2.1 Hz, 1H), 5.92 (d, *J* = 2.1 Hz, 1H), 3.74 (s, 3H), 1.32 (s, 9H).  $^{13}\text{C NMR}$  (126 MHz,  $\text{CDCl}_3$ )  $\delta$  167.7, 161.1, 149.6, 146.0, 135.2, 134.1, 133.0, 131.9, 131.3, 130.1, 129.3, 129.0, 128.2, 127.8, 125.8, 120.1, 117.5, 107.0, 97.5, 55.6, 35.8, 31.8. (*E*) Form:  $[\alpha]_D^{25} = +12.0$  (*c* = 0.1 in MeOH),  $^1\text{H NMR}$  (500 MHz,  $\text{CDCl}_3$ )  $\delta$  7.78 (s, 1H), 7.71 (d, *J* = 7.5 Hz, 2H), 7.69 – 7.63 (m, 2H), 7.48 (t, *J* = 7.4 Hz, 2H), 7.45 – 7.40 (m, 2H), 7.33 (dd, *J* = 10.8, 4.1 Hz, 1H), 7.07 – 7.02 (m, 1H), 6.42 (dd, *J* = 8.5, 2.3 Hz, 1H), 5.90 (d, *J* = 2.3 Hz, 1H), 3.70 (s, 3H), 1.35 (s, 9H).  $^{13}\text{C NMR}$  (126 MHz,  $\text{CDCl}_3$ )  $\delta$  170.1, 161.4, 149.6, 148.2, 135.3, 134.7, 133.0, 131.2, 129.4, 129.3, 129.2, 129.0, 128.6, 127.9, 126.9, 123.8, 114.3, 106.5, 98.0, 55.5, 35.7, 31.7.

**HRMS (ESI)**: calcd for  $\text{C}_{26}\text{H}_{26}\text{NO}_2$   $[\text{M}+\text{H}]^+$  384.1958; found 384.1955.

The ee was determined by Daicel Chiralcel OD-H (0.46 cm x 25 cm), hexane/isopropanol = 98/2, 1 mL/min,  $\lambda = 254$  nm,  $t_R$  (minor) = 11.157/16.224 min,  $t_R$  (major) = 8.466/13.894 min.

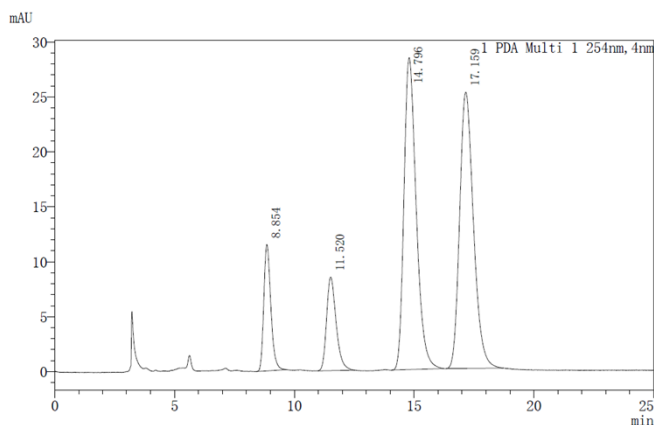

| PDA Ch1 254nm |           |              |                |             |                 |
|---------------|-----------|--------------|----------------|-------------|-----------------|
| NO.           | Ret. Time | Height (uAU) | Area (uAU*min) | Rel. Area % | Resolution(USP) |
| 1             | 8.854     | 11513        | 235531         | 9.469       | ---             |
| 2             | 11.520    | 8508         | 235443         | 9.465       | 4.241           |
| 3             | 14.796    | 28399        | 1008337        | 40.537      | 3.982           |
| 4             | 17.159    | 25143        | 1008155        | 40.529      | 2.396           |

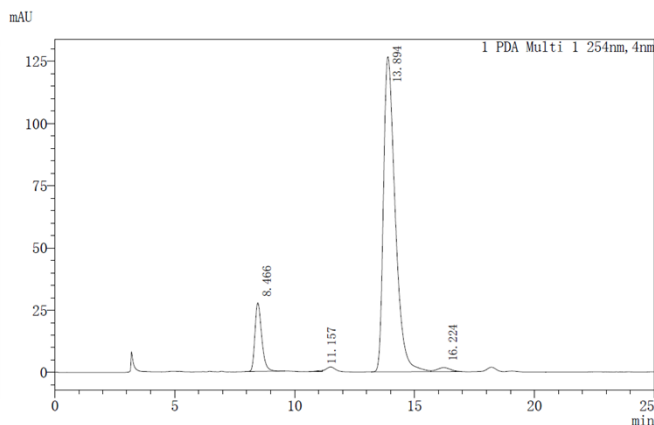

| PDA Ch1 254nm |           |              |                |             |                 |
|---------------|-----------|--------------|----------------|-------------|-----------------|
| NO.           | Ret. Time | Height (uAU) | Area (uAU*min) | Rel. Area % | Resolution(USP) |
| 1             | 8.466     | 27557        | 541261         | 10.974      | ---             |
| 2             | 11.157    | 471          | 8015           | 0.162       | 2.745           |
| 3             | 13.894    | 126689       | 4318734        | 87.565      | 2.355           |
| 4             | 16.224    | 1671         | 64022          | 1.298       | 2.440           |

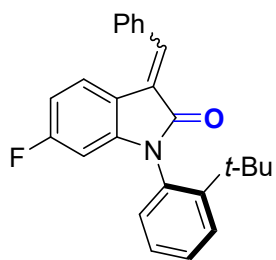

3-benzylidene-1-(2-(*tert*-butyl)phenyl)-6-fluoroindolin-2-one (**7-26**)

Yellow oil (34.9 mg, 94% yield, *Z/E*  $\approx$  1:6.3, 96% ee, 95% ee). (*Z*)&(*E*) Form:  $[\alpha]_D^{25} = +27.6$  ( $c = 0.5$  in MeOH),  $^1\text{H NMR}$  (500 MHz,  $\text{CDCl}_3$ )  $\delta$  8.36 – 8.27 (m, 0.35H), 7.90 (s, 1H), 7.73 – 7.62 (m, 4.36H), 7.56 (s, 0.2H), 7.56 – 7.53 (m, 0.18H), 7.50 (t,  $J = 7.3$  Hz, 2H), 7.47 – 7.42 (m, 2.75H), 7.34 (q,  $J = 7.1$  Hz, 1.29H), 7.04 (d,  $J = 7.7$  Hz, 1.2H), 6.80 – 6.72 (m, 0.18H), 6.58 (td,  $J = 9.0, 2.2$  Hz, 1H), 6.14 – 6.04 (m, 1.19H), 1.35 (s, 9H), 1.32 (s, 1.83H).  $^{13}\text{C NMR}$  (126 MHz,  $\text{CDCl}_3$ )  $\delta$  169.6, 167.3, 163.9 (d,  $J = 249.5$  Hz), 163.7 (d,  $J = 248.2$  Hz), 149.6, 149.5, 148.2 (d,  $J = 11.2$  Hz), 145.8 (d,  $J = 11.4$  Hz), 137.4 (d,  $J = 2.9$  Hz), 137.3 (d,  $J = 3.0$  Hz), 134.8, 133.7, 132.6, 132.1, 131.1, 131.0, 130.6, 129.7 (d,  $J = 5.3$  Hz), 129.5, 129.3, 129.1, 129.1, 128.7, 128.3, 128.0, 127.9, 126.3 (d,  $J = 1.6$  Hz), 125.0 (d,  $J = 1.6$  Hz), 124.1, 124.0, 120.4 (d,  $J = 2.8$  Hz), 120.3, 120.2, 117.2 (d,  $J = 2.8$  Hz), 108.6 (d,  $J = 21.4$  Hz), 108.4 (d,  $J = 22.6$  Hz), 99.2 (d,  $J = 27.9$  Hz), 98.8 (d,  $J = 27.6$  Hz), 35.7, 35.7, 31.7, 31.7.  $^{19}\text{F NMR}$  (471 MHz,  $\text{CDCl}_3$ )  $\delta$  -108.3, -110.2.

**HRMS (ESI)**: calcd for  $\text{C}_{25}\text{H}_{23}\text{FNO}$   $[\text{M}+\text{H}]^+$  372.1758; found 372.1761.

The ee was determined by Daicel Chiralcel OD-H (0.46 cm x 25 cm), hexane/isopropanol = 98/2, 1 mL/min,  $\lambda = 254$  nm,  $t_R$  (minor) = 8.949/11.605 min,  $t_R$  (major) = 6.619/9.931 min.

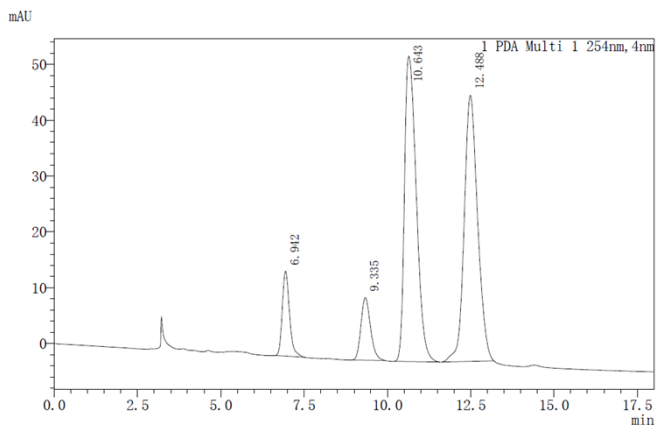

| PDA Ch1 254nm |           |              |                |             |                 |
|---------------|-----------|--------------|----------------|-------------|-----------------|
| NO.           | Ret. Time | Height (uAU) | Area (uAU*min) | Rel. Area % | Resolution(USP) |
| 1             | 6.942     | 15224        | 229643         | 7.318       | ---             |
| 2             | 9.335     | 11207        | 223809         | 7.132       | 5.178           |
| 3             | 10.643    | 54712        | 1345887        | 42.888      | 2.242           |
| 4             | 12.488    | 47639        | 1338807        | 42.662      | 2.691           |

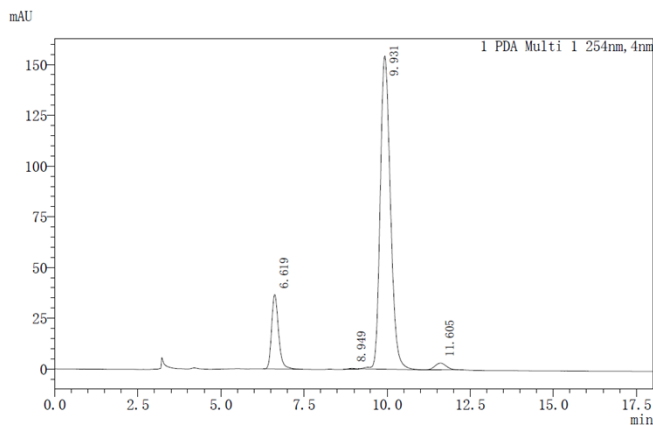

| PDA Ch1 254nm |           |              |                |             |                 |
|---------------|-----------|--------------|----------------|-------------|-----------------|
| NO.           | Ret. Time | Height (uAU) | Area (uAU*min) | Rel. Area % | Resolution(USP) |
| 1             | 6.619     | 36638        | 531553         | 13.525      | ---             |
| 2             | 8.949     | 551          | 9347           | 0.238       | 5.190           |
| 3             | 9.931     | 154374       | 3313109        | 84.299      | 1.813           |
| 4             | 11.605    | 3281         | 76188          | 1.939       | 2.809           |



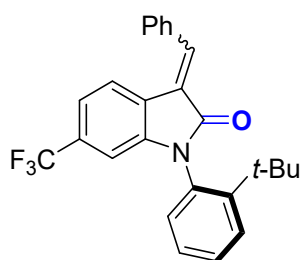

3-benzylidene-1-(2-(*tert*-butyl)phenyl)-6-(trifluoromethyl)indolin-2-one (**7-27**)

Yellow oil (28.2 mg, 67% yield, *Z/E*  $\approx$  1:4.5, 85% ee, 85% ee). (*Z*)&(*E*) Form:  $[\alpha]_D^{25} = +23.3$  ( $c = 0.3$  in MeOH),  $^1\text{H NMR}$  (500 MHz,  $\text{CDCl}_3$ )  $\delta$  8.42 – 8.37 (m, 0.29H), 8.07 (s, 1H), 7.80 (d,  $J = 8.0$  Hz, 1H), 7.76 – 7.67 (m, 3.65H), 7.57 – 7.43 (m, 4.87H), 7.41 – 7.33 (m, 1.42H), 7.17 (d,  $J = 8.0$  Hz, 1H), 7.05 (dd,  $J = 7.7, 1.0$  Hz, 1.18H), 6.57 (s, 0.15H), 6.55 (s, 1H), 1.33 (s, 9H), 1.30 (s, 1.48H).  $^{13}\text{C NMR}$  (126 MHz,  $\text{CDCl}_3$ )  $\delta$  169.0, 166.9, 149.5, 146.6, 144.5, 140.8, 140.5, 134.4, 132.7, 132.4, 131.6, 131.5, 131.3, 131.1, 131.0, 130.3, 129.8, 129.7, 129.4, 129.3, 129.2, 128., 128.5, 128.2, 128.1, 126.1, 124.8, 124.3, 122.7, 118.9 (q,  $J = 3.8$  Hz), 107.34 (q,  $J = 3.8$  Hz), 35.8, 35.7, 31.7, 31.7.  $^{19}\text{F NMR}$  (471 MHz,  $\text{CDCl}_3$ )  $\delta$  -62.3, -62.8.

**HRMS (ESI)**: calcd for  $\text{C}_{26}\text{H}_{23}\text{F}_3\text{NO}$   $[\text{M}+\text{H}]^+$  422.1726; found 422.1724.

The ee was determined by Daicel Chiralcel OD-H (0.46 cm x 25 cm), hexane/isopropanol = 98/2, 1 mL/min,  $\lambda = 254$  nm,  $t_R$  (minor) = 8.661/11.743 min,  $t_R$  (major) = 6.376/9.913 min.

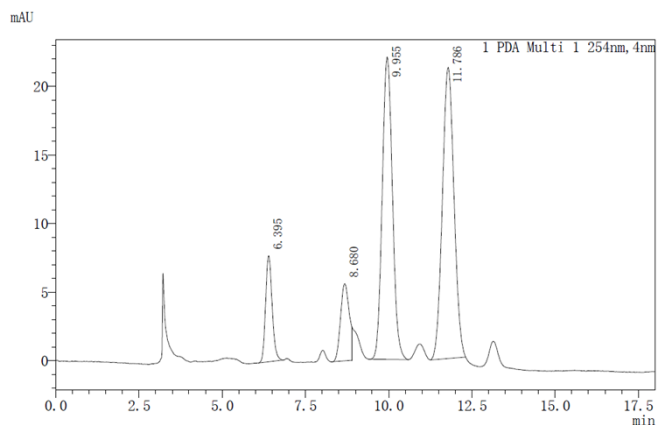

| PDA Ch1 254nm |           |              |                |             |                 |
|---------------|-----------|--------------|----------------|-------------|-----------------|
| NO.           | Ret. Time | Height (uAU) | Area (uAU*min) | Rel. Area % | Resolution(USP) |
| 1             | 6.395     | 7725         | 105790         | 8.870       | ---             |
| 2             | 8.680     | 5633         | 102332         | 8.580       | 5.024           |
| 3             | 9.955     | 22053        | 469221         | 39.342      | 2.293           |
| 4             | 11.786    | 21228        | 515316         | 43.207      | 3.000           |

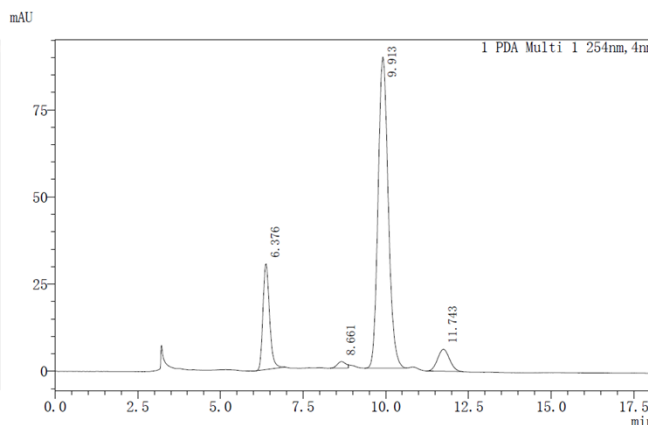

| PDA Ch1 254nm |           |              |                |             |                 |
|---------------|-----------|--------------|----------------|-------------|-----------------|
| NO.           | Ret. Time | Height (uAU) | Area (uAU*min) | Rel. Area % | Resolution(USP) |
| 1             | 6.376     | 30312        | 420822         | 16.674      | ---             |
| 2             | 8.661     | 1881         | 34018          | 1.348       | 4.918           |
| 3             | 9.913     | 89211        | 1910826        | 75.711      | 2.229           |
| 4             | 11.743    | 6292         | 158189         | 6.268       | 2.962           |

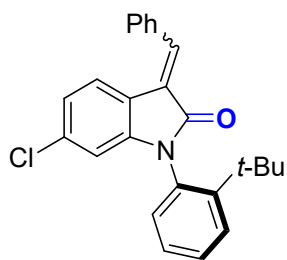

3-benzylidene-1-(2-(*tert*-butyl)phenyl)-6-chloroindolin-2-one (**7-28**)

Yellow oil (36.8 mg, 95% yield, *Z/E*  $\approx$  1:8.1, 95% ee, 95% ee). (*Z*)&(*E*) Form:  $[\alpha]_D^{25} = +27.6$  ( $c = 0.42$  in MeOH),  $^1\text{H NMR}$  (500 MHz,  $\text{CDCl}_3$ )  $\delta$  8.37 – 8.29 (m, 0.51H), 7.95 (s, 1H), 7.68 (dd,  $J = 15.2, 7.3$  Hz, 3.48H), 7.64 – 7.60 (m, 1.33H), 7.54 – 7.41 (m, 5.63H), 7.35 (q,  $J = 7.6$  Hz, 1.36H), 7.04 (t,  $J = 7.5$  Hz, 1.56H), 6.87 (dd,  $J = 8.2, 1.4$  Hz, 1H), 6.36 (s, 0.22H), 6.34 (d,  $J = 1.3$  Hz, 1H), 1.34 (s, 9H), 1.31 (s, 2.56H).  $^{13}\text{C NMR}$  (126 MHz,  $\text{CDCl}_3$ )  $\delta$  169.3, 167.0, 149.6, 147.5, 145.3, 138.4, 138.4, 135.5, 134.7, 134.6, 133.6, 132.6, 132.6, 132.3, 131.1, 131.0, 130.9, 129.9, 129.7, 129.5, 129.4, 129.1, 129.1, 128.8, 128.4, 128.0, 127.9, 126.3, 125.0, 123.5, 123.0, 122.0 121.9, 119.9, 119.7, 111.2, 110.8, 35.8, 35.7, 31.7, 31.7.

**HRMS (ESI)**: calcd for  $\text{C}_{25}\text{H}_{23}\text{ClNO}$   $[\text{M}+\text{H}]^+$  388.1463; found 388.1462.

The ee was determined by Daicel Chiralcel OD-H (0.46 cm x 25 cm), hexane/isopropanol = 98/2, 1 mL/min,  $\lambda = 254$  nm,  $t_R$  (minor) = 9.192/12.113 min,  $t_R$  (major) = 6.750/10.049 min.

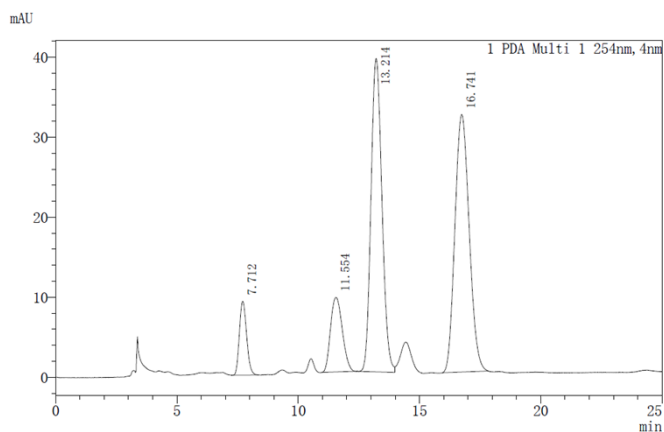

| PDA Ch1 254nm |           |              |                |             |                 |
|---------------|-----------|--------------|----------------|-------------|-----------------|
| NO.           | Ret. Time | Height (uAU) | Area (uAU*min) | Rel. Area % | Resolution(USP) |
| 1             | 7.712     | 9227         | 191500         | 6.275       | ---             |
| 2             | 11.554    | 9319         | 314391         | 10.301      | 5.325           |
| 3             | 13.214    | 39189        | 1227479        | 40.218      | 1.928           |
| 4             | 16.741    | 32207        | 1318667        | 43.206      | 3.665           |

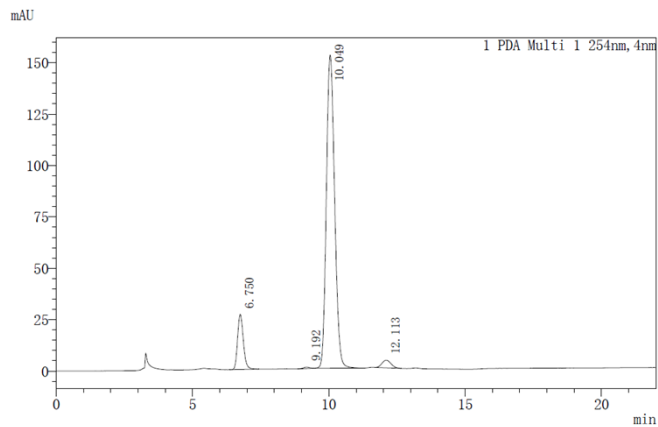

| PDA Ch1 254nm |           |              |                |             |                 |
|---------------|-----------|--------------|----------------|-------------|-----------------|
| NO.           | Ret. Time | Height (uAU) | Area (uAU*min) | Rel. Area % | Resolution(USP) |
| 1             | 6.750     | 26803        | 394526         | 10.672      | ---             |
| 2             | 9.192     | 656          | 10244          | 0.277       | 5.945           |
| 3             | 10.049    | 152343       | 3205667        | 86.716      | 1.731           |
| 4             | 12.113    | 3739         | 86291          | 2.334       | 3.488           |

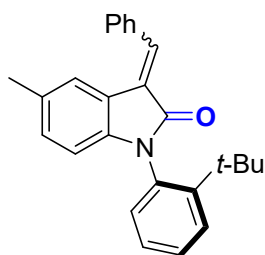

3-benzylidene-1-(2-(*tert*-butyl)phenyl)-5-methylindolin-2-one (**7-29**)

Yellow oil (31.9 mg, 87% yield, *Z/E*  $\approx$  1:4, 92% ee, 92% ee). (*Z*) Form:  $[\alpha]_D^{25} = +41.5$  ( $c = 0.27$  in MeOH),  $^1\text{H NMR}$  (500 MHz,  $\text{CDCl}_3$ )  $\delta$  8.36 (d,  $J = 6.5$  Hz, 2H), 7.64 (d,  $J = 8.1$  Hz, 1H), 7.60 (s, 1H), 7.42 (dd,  $J = 12.9, 5.2$  Hz, 5H), 7.31 (t,  $J = 7.5$  Hz, 1H), 7.04 (d,  $J = 7.7$  Hz, 1H), 7.00 (d,  $J = 7.9$  Hz, 1H), 6.26 (d,  $J = 7.9$  Hz, 1H), 2.39 (s, 3H), 1.32 (s, 9H).  $^{13}\text{C NMR}$  (126 MHz,  $\text{CDCl}_3$ )  $\delta$  167.3, 149.6, 142.5, 137.3, 133.9, 133.4, 132.2, 131.4, 131.3, 130.5, 129.4, 129.2, 128.9, 128.3, 127.8, 126.3, 124.6, 119.6, 110.2, 35.7, 31.7, 21.2. (*E*) Form:  $[\alpha]_D^{25} = +12.4$  ( $c = 0.37$  in MeOH),  $^1\text{H NMR}$  (500 MHz,  $\text{CDCl}_3$ )  $\delta$  7.91 (s, 1H), 7.73 (d,  $J = 7.4$  Hz, 2H), 7.66 (d,  $J = 8.1$  Hz, 1H), 7.54 (s, 1H), 7.50 (t,  $J = 7.4$  Hz, 2H), 7.48 – 7.40 (m, 2H), 7.33 (t,  $J = 7.5$  Hz, 1H), 7.05 (d,  $J = 7.7$  Hz, 1H), 6.97 (d,  $J = 8.0$  Hz, 1H), 6.25 (d,  $J = 8.0$  Hz, 1H), 2.23 (s, 3H), 1.34 (s, 9H).  $^{13}\text{C NMR}$  (126 MHz,  $\text{CDCl}_3$ )  $\delta$  169.5, 149.6, 144.4, 137.5, 135.1, 133.4, 131.2, 131.2, 130.2, 129.6, 129.4, 129.3, 128.9, 128.6, 127.9, 127.5, 123.3, 121.2, 110.6, 35.7, 31.7, 21.1.

**HRMS (ESI)**: calcd for  $\text{C}_{26}\text{H}_{26}\text{NO}$   $[\text{M}+\text{H}]^+$  368.2009; found 368.2008.

The ee was determined by Daicel Chiralcel OD-H (0.46 cm x 25 cm), hexane/isopropanol = 98/2, 1 mL/min,  $\lambda = 254$  nm,  $t_R$  (minor) = 7.728/12.860 min,  $t_R$  (major) = 6.372/10.842 min.

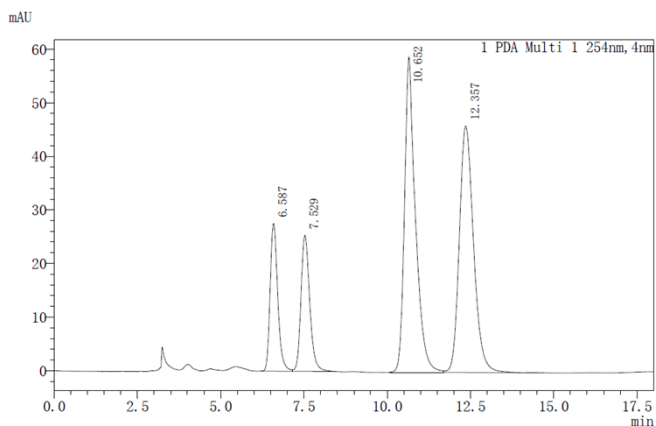

| PDA Ch1 254nm |           |              |                |             |                 |
|---------------|-----------|--------------|----------------|-------------|-----------------|
| NO.           | Ret. Time | Height (uAU) | Area (uAU*min) | Rel. Area % | Resolution(USP) |
| 1             | 6.587     | 27566        | 436972         | 12.108      | —               |
| 2             | 7.529     | 25363        | 462979         | 12.829      | 2.112           |
| 3             | 10.652    | 58825        | 1344342        | 37.251      | 5.978           |
| 4             | 12.357    | 45986        | 1364627        | 37.813      | 2.543           |

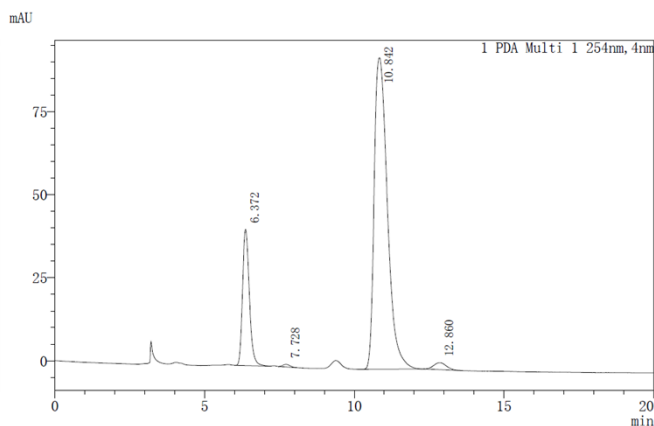

| PDA Ch1 254nm |           |              |                |             |                 |
|---------------|-----------|--------------|----------------|-------------|-----------------|
| NO.           | Ret. Time | Height (uAU) | Area (uAU*min) | Rel. Area % | Resolution(USP) |
| 1             | 6.372     | 41065        | 649655         | 18.040      | —               |
| 2             | 7.728     | 777          | 12736          | 0.354       | 3.111           |
| 3             | 10.842    | 93880        | 2877434        | 79.901      | 5.107           |
| 4             | 12.860    | 2097         | 61443          | 1.706       | 2.600           |

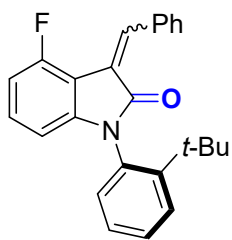

3-benzylidene-1-(2-(*tert*-butyl)phenyl)-4-fluoroindolin-2-one (**7-30**)

Yellow oil (31.9 mg, 86% yield, *Z/E* ≈ 2.1:1, 96% ee, 96% ee). (*Z*)&(*E*) Form:  $[\alpha]_D^{25} = +7.7$  ( $c = 0.39$  in MeOH),  $^1\text{H NMR}$  (500 MHz,  $\text{CDCl}_3$ )  $\delta$  8.33 – 8.26 (m, 2H), 8.11 (s, 0.26H), 8.01 (d,  $J = 3.3$  Hz, 1H), 7.69 – 7.62 (m, 1.27H), 7.52 (d,  $J = 3.8$  Hz, 0.55H), 7.48 – 7.38 (m, 5.14H), 7.34 (dt,  $J = 15.0, 7.6$  Hz, 1.33H), 7.12 – 7.05 (m, 1.32H), 7.05 (t,  $J = 6.8$  Hz, 1.28H), 6.81 – 6.75 (m, 1H), 6.69 (t,  $J = 9.2$  Hz, 0.28H), 6.17 (t,  $J = 8.4$  Hz, 1.26H), 1.34 (s, 2.49H), 1.31 (s, 9H).  $^{13}\text{C NMR}$  (126 MHz,  $\text{CDCl}_3$ )  $\delta$  169.3, 166.5, 158.3 (d,  $J = 252.0$  Hz), 157.7 (d,  $J = 257.0$  Hz), 149.5, 149.5, 148.4 (d,  $J = 8.0$  Hz), 146.1 (d,  $J = 7.9$  Hz), 143.2 (d,  $J = 12.3$  Hz), 139.7 (d,  $J = 2.5$  Hz), 135.5 (d,  $J = 2.2$  Hz), 134.1, 132.9, 132.3, 131.2, 131.2, 130.7 (d,  $J = 8.8$  Hz), 130.7, 130.3 (d,  $J = 5.2$  Hz), 129.6, 129.5, 129.4, 129.1, 129.1, 128.2, 127.9, 127.8, 127.6, 124.0 (d,  $J = 5.2$  Hz), 123.4 (d,  $J = 3.9$  Hz), 111.6 (d,  $J = 15.5$  Hz), 110.2 (d,  $J = 22.5$  Hz), 109.7 (d,  $J = 21.1$  Hz), 109.0 (d,  $J = 19.9$  Hz), 106.7 (d,  $J = 3.1$  Hz), 106.4 (d,  $J = 3.0$  Hz), 35.8, 35.8, 31.7, 31.7.  $^{19}\text{F NMR}$  (471 MHz,  $\text{CDCl}_3$ )  $\delta$  -95.5, -119.5.

**HRMS (ESI):** calcd for  $\text{C}_{25}\text{H}_{23}\text{FNO}$   $[\text{M}+\text{H}]^+$  372.1758; found 372.1755.

The ee was determined by Daicel Chiralcel OD-H (0.46 cm x 25 cm), hexane/isopropanol = 98/2, 1 mL/min,  $\lambda = 254$  nm,  $t_R$  (minor) = 6.846/16.024 min,  $t_R$  (major) = 6.119/13.993 min.

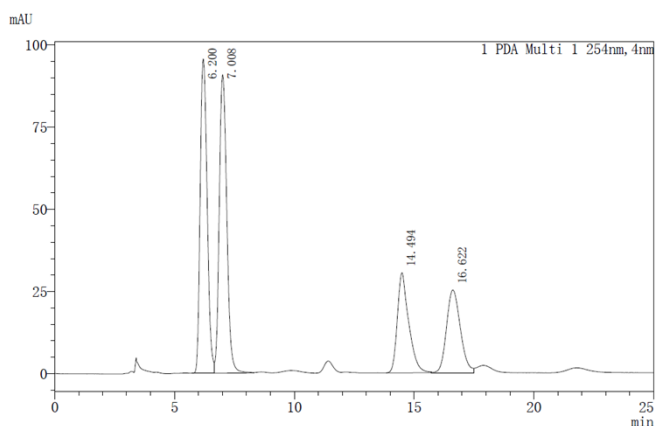

| PDA Ch1 254nm |           |              |                |             |                  |
|---------------|-----------|--------------|----------------|-------------|------------------|
| NO.           | Ret. Time | Height (uAU) | Area (uAU*min) | Rel. Area % | Resolution (USP) |
| 1             | 6.200     | 95690        | 1933844        | 32.593      | —                |
| 2             | 7.008     | 90797        | 1982403        | 33.411      | 1.464            |
| 3             | 14.494    | 30480        | 1006621        | 16.965      | 10.693           |
| 4             | 16.622    | 25204        | 1010511        | 17.031      | 2.260            |

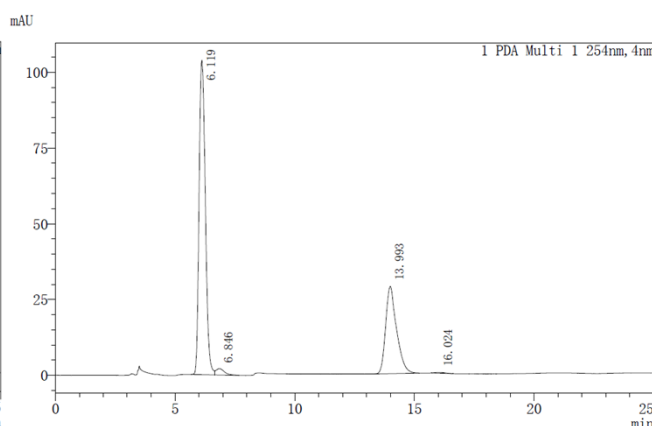

| PDA Ch1 254nm |           |              |                |             |                  |
|---------------|-----------|--------------|----------------|-------------|------------------|
| NO.           | Ret. Time | Height (uAU) | Area (uAU*min) | Rel. Area % | Resolution (USP) |
| 1             | 6.119     | 103780       | 1887332        | 66.080      | —                |
| 2             | 6.846     | 2068         | 51584          | 1.806       | 1.150            |
| 3             | 13.993    | 28787        | 909467         | 31.843      | 9.045            |
| 4             | 16.024    | 264          | 7760           | 0.272       | 2.589            |

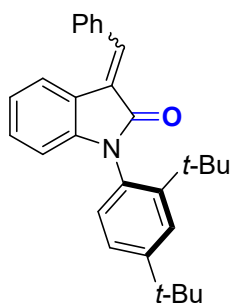

3-benzylidene-1-(2,4-di-*tert*-butylphenyl)indolin-2-one (**7-31**)

Yellow oil (36.0 mg, 88% yield, *Z/E* ≈ 1:1.8, 90% ee, 90% ee). (*Z*) Form:  $^1\text{H NMR}$  (500 MHz,  $\text{CDCl}_3$ )  $\delta$  8.37 (dd,  $J = 7.5, 1.9$  Hz, 2H), 7.65 (d,  $J = 2.2$  Hz, 1H), 7.62 (s, 1H), 7.60 (d,  $J = 7.6$  Hz, 1H), 7.44 – 7.39 (m, 3H), 7.32 (dd,  $J = 8.1, 2.2$  Hz, 1H), 7.19 (td,  $J = 7.7, 0.9$  Hz, 1H), 7.07 (td,  $J = 7.6, 0.8$  Hz, 1H), 6.96 (d,  $J = 8.1$  Hz, 1H), 6.42 (d,  $J = 7.8$  Hz, 1H), 1.36 (s, 9H), 1.31 (s, 9H).  $^{13}\text{C NMR}$  (126 MHz,  $\text{CDCl}_3$ )  $\delta$  167.3, 151.7, 148.5, 144.7, 137.5, 133.9, 132.3, 130.5, 130.5, 130.2, 128.8, 128.3, 126.2, 125.9, 124.8, 124.5, 121.8, 118.8, 110.6, 35.9, 34.8, 31.8, 31.4. (*E*) Form:  $[\alpha]_D^{25} = +8.5$  ( $c = 0.4$  in MeOH),  $^1\text{H NMR}$  (500 MHz,  $\text{CDCl}_3$ )  $\delta$  7.93 (s, 1H), 7.72 (d,  $J = 7.4$  Hz, 2H), 7.70 (d,  $J = 7.9$  Hz, 1H), 7.66 (d,  $J = 2.1$  Hz, 1H), 7.49 (t,  $J = 7.3$  Hz, 2H), 7.45 (d,  $J = 7.2$  Hz, 1H), 7.33 (dd,  $J = 8.1, 2.2$  Hz, 1H), 7.15 (t,  $J = 7.7$  Hz, 1H), 6.96 (d,  $J = 8.1$  Hz, 1H), 6.88 (t,  $J = 7.4$  Hz, 1H), 6.38 (d,  $J = 7.8$  Hz, 1H), 1.37 (s, 9H), 1.34 (s, 9H).  $^{13}\text{C NMR}$  (126 MHz,  $\text{CDCl}_3$ )  $\delta$  169.5, 151.8, 148.5, 146.6, 137.7, 135.1, 132.3, 130.5, 130.2, 129.7, 129.6, 129.4, 128.6, 125.9, 125.0, 122.6, 121.8, 121.2, 111.0, 35.9, 34.9, 31.7, 31.4.

**HRMS (ESI)**: calcd for  $\text{C}_{29}\text{H}_{32}\text{NO}$   $[\text{M}+\text{H}]^+$  410.2478; found 410.2476.

The ee was determined by FLM Co. MX(2) (0.46 cm x 25 cm), hexane/isopropanol = 94/6, 1 mL/min,  $\lambda = 254$  nm,  $t_R$  (minor) = 5.293/8.613 min,  $t_R$  (major) = 6.432/10.120 min.

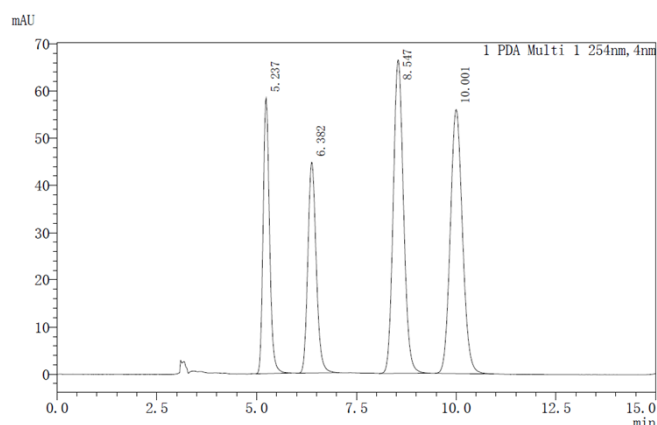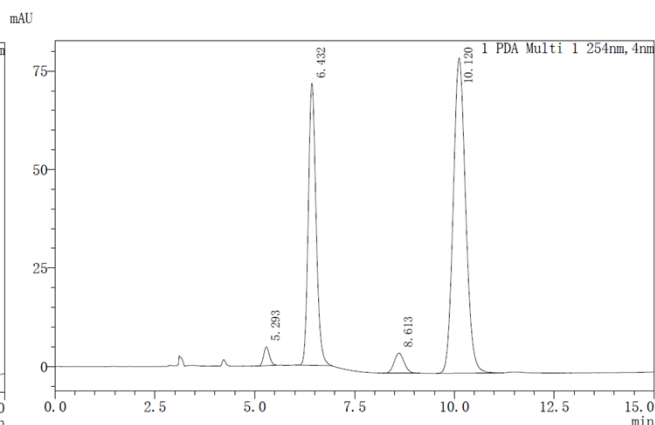

| PDA Ch1 254nm |           |              |                |             |                  |
|---------------|-----------|--------------|----------------|-------------|------------------|
| NO.           | Ret. Time | Height (uAU) | Area (uAU*min) | Rel. Area % | Resolution (USP) |
| 1             | 5.237     | 58401        | 650864         | 17.715      | --               |
| 2             | 6.382     | 44646        | 652242         | 17.753      | 3.325            |
| 3             | 8.547     | 66427        | 1186580        | 32.296      | 5.009            |
| 4             | 10.001    | 55970        | 1184336        | 32.235      | 2.805            |

| PDA Ch1 254nm |           |              |                |             |                  |
|---------------|-----------|--------------|----------------|-------------|------------------|
| NO.           | Ret. Time | Height (uAU) | Area (uAU*min) | Rel. Area % | Resolution (USP) |
| 1             | 5.293     | 4742         | 48264          | 1.705       | --               |
| 2             | 6.432     | 71579        | 968667         | 34.230      | 3.531            |
| 3             | 8.613     | 5085         | 89151          | 3.150       | 5.234            |
| 4             | 10.120    | 80038        | 1723833        | 60.915      | 2.895            |

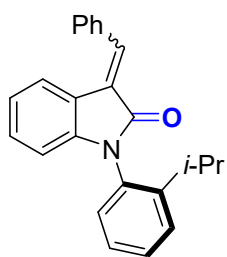

3-benzylidene-1-(2-isopropylphenyl)indolin-2-one (**7-32**)

Yellow oil (30.8 mg, 91% yield, *Z/E*  $\approx$  1:3.9, 24% ee, 19% ee). (*Z*)&(*E*) Form: **<sup>1</sup>H NMR** (500 MHz, CDCl<sub>3</sub>)  $\delta$  8.36 (d, *J* = 6.8 Hz, 0.36H), 7.96 (s, 1H), 7.73 – 7.66 (m, 3.42H), 7.63 (d, *J* = 7.5 Hz, 0.2H), 7.55 – 7.41 (m, 6.34H), 7.35 (t, *J* = 7.3 Hz, 1.44H), 7.22 (d, *J* = 7.7 Hz, 1.28H), 7.19 – 7.14 (m, 1.29H), 7.09 (t, *J* = 7.5 Hz, 0.25H), 6.90 (t, *J* = 7.6 Hz, 1H), 6.44 (d, *J* = 7.8 Hz, 1.23H), 2.97 – 2.91 (m, 1.29H), 1.26 (d, *J* = 6.8 Hz, 3H), 1.21 (d, *J* = 6.8 Hz, 0.66H), 1.14 (d, *J* = 6.7 Hz, 3.98H). **<sup>13</sup>C NMR** (126 MHz, CDCl<sub>3</sub>)  $\delta$  168.3, 166.0, 147.7, 145.3, 143.5, 137.9, 137.7, 135.1, 133.8, 132.3, 132.2, 132.2, 130.6, 129.8, 129.6, 129.5, 129.3, 128.9, 128.9, 128.7, 128.7, 128.3, 127.3, 127.2, 127.1, 127.1, 126.9, 125.9, 124.4, 122.8, 122.0, 121.1, 119.0, 109.5, 109.2, 28.5, 28.4, 23.9, 23.7, 23.6.

**HRMS (ESI)**: calcd for C<sub>24</sub>H<sub>22</sub>NO [M+H]<sup>+</sup> 340.1696; found 340.1699.

The ee was determined by FLM Co. MX(2) (0.46 cm x 25 cm), hexane/isopropanol = 90/10, 1 mL/min,  $\lambda$  = 254 nm, *t<sub>R</sub>* (minor) = 5.507/9.630 min, *t<sub>R</sub>* (major) = 5.752/12.941 min.

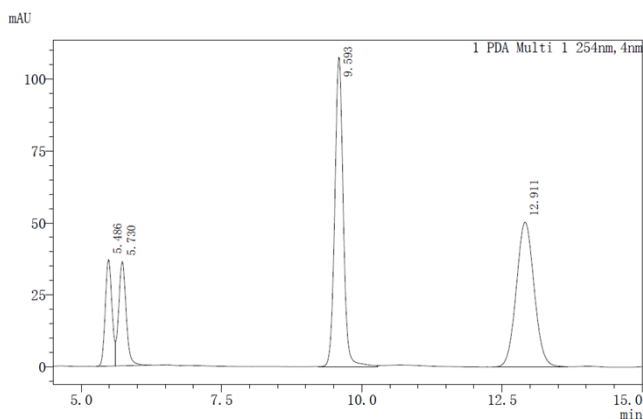

| PDA Ch1 254nm |           |              |                |             |                 |
|---------------|-----------|--------------|----------------|-------------|-----------------|
| NO.           | Ret. Time | Height (uAU) | Area (uAU*min) | Rel. Area % | Resolution(USP) |
| 1             | 5.486     | 37042        | 311866         | 10.786      | ---             |
| 2             | 5.730     | 36258        | 334383         | 11.565      | 0.976           |
| 3             | 9.593     | 107546       | 1129844        | 39.077      | 14.291          |
| 4             | 12.911    | 50387        | 1115212        | 38.571      | 7.640           |

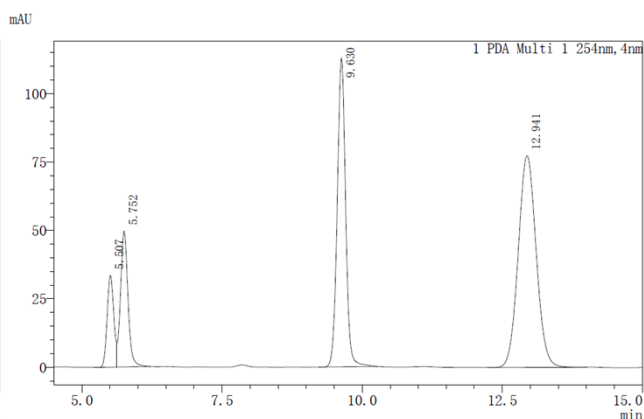

| PDA Multi 1 254nm, 4nm |           |              |                |             |                 |
|------------------------|-----------|--------------|----------------|-------------|-----------------|
| NO.                    | Ret. Time | Height (uAU) | Area (uAU*min) | Rel. Area % | Resolution(USP) |
| 1                      | 5.507     | 33578        | 279771         | 7.702       | ---             |
| 2                      | 5.752     | 49651        | 458480         | 12.621      | 0.979           |
| 3                      | 9.630     | 112859       | 1173077        | 32.293      | 14.456          |
| 4                      | 12.941    | 77404        | 1721305        | 47.384      | 7.597           |

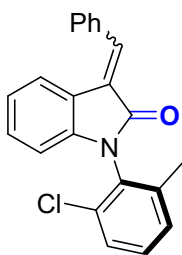

3-benzylidene-1-(2-chloro-6-methylphenyl)indolin-2-one (**7-33**)

Yellow oil (30.4 mg, 88% yield, *Z/E*  $\approx$  1:3.3, 14% ee, 11% ee). (*Z*)&(*E*) Form:  $^1\text{H NMR}$  (500 MHz,  $\text{CDCl}_3$ )  $\delta$  8.34 (d,  $J = 6.4$  Hz, 0.52H), 7.97 (s, 1H), 7.74 – 7.68 (m, 3.49H), 7.65 (d,  $J = 7.4$  Hz, 0.28H), 7.50 (t,  $J = 7.3$  Hz, 2H), 7.47 – 7.43 (m, 3H), 7.37 – 7.28 (m, 2.84H), 7.21 – 7.16 (m, 1.37H), 7.11 (t,  $J = 7.6$  Hz, 0.29H), 6.93 (t,  $J = 7.5$  Hz, 1H), 6.38 (t,  $J = 7.2$  Hz, 1.28H), 2.24 (s, 3H), 2.22 (s, 0.89H).  $^{13}\text{C NMR}$  (126 MHz,  $\text{CDCl}_3$ )  $\delta$  167.3, 143.0, 139.9, 139.9, 138.2, 138.2, 134.9, 134.0, 132.2, 131.1, 130.7, 130.0, 129.9, 129.9, 129.7, 129.5, 129.4, 129.4, 129.0, 128.7, 128.3, 128.1, 128.0, 126.7, 123.1, 122.3, 122.3, 121.2, 119.3, 109.2, 108.9, 18.3.

**HRMS (ESI)**: calcd for  $\text{C}_{22}\text{H}_{17}\text{ClNO}^+$   $[\text{M}+\text{H}]^+$  346.0993; found 346.0990.

The ee was determined by Daicel Chiralcel AD-H (0.46 cm x 25 cm), hexane/isopropanol = 95/5, 1 mL/min,  $\lambda = 254$  nm,  $t_R$  (minor) = 18.292/71.539 min,  $t_R$  (major) = 11.923/27.223 min.

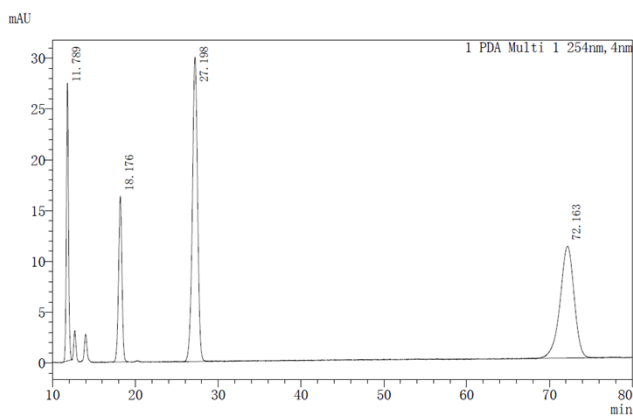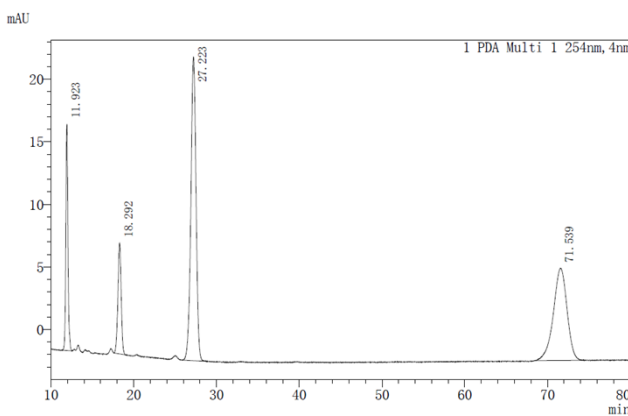

| PDA Ch1 254nm |           |              |                |             |                  |
|---------------|-----------|--------------|----------------|-------------|------------------|
| NO.           | Ret. Time | Height (uAU) | Area (uAU*min) | Rel. Area % | Resolution (USP) |
| 1             | 11.789    | 27369        | 483406         | 13.612      | —                |
| 2             | 18.176    | 16294        | 465780         | 13.115      | 10.515           |
| 3             | 27.198    | 29987        | 1304183        | 36.723      | 9.560            |
| 4             | 72.163    | 11021        | 1298074        | 36.551      | 21.547           |

| PDA Ch1 254nm |           |              |                |             |                  |
|---------------|-----------|--------------|----------------|-------------|------------------|
| NO.           | Ret. Time | Height (uAU) | Area (uAU*min) | Rel. Area % | Resolution (USP) |
| 1             | 11.923    | 18110        | 322420         | 13.119      | —                |
| 2             | 18.292    | 8851         | 244820         | 9.961       | 10.628           |
| 3             | 27.223    | 24269        | 1048365        | 42.656      | 9.563            |
| 4             | 71.539    | 7366         | 842131         | 34.265      | 21.825           |

## 2.7 Procedure for Control experiments

A 10 mL tube was charged with PdCl<sub>2</sub> or Pd(TFA)<sub>2</sub> (0.01 mmol, 10 mol%), (R)-BINAP or (R)-TMS-SYNPHOS (0.01 mmol, 10 mol%), PTSA•H<sub>2</sub>O (7.6 mg, 0.04 mmol, 40 mol%), **6-1** (0.1 mmol), and CH<sub>3</sub>CN (1 mL). Then, the reaction tube is placed in the autoclave, and the mixture was refilled with CO for 3 times carefully in a well-ventilated fume hood, and then the CO gas was flushed to 22 atm. Finally, the autoclave was placed at 80 °C for 24 h. After completion of the reaction, according to TLC monitoring, no product was produced and remains as **6-1**.

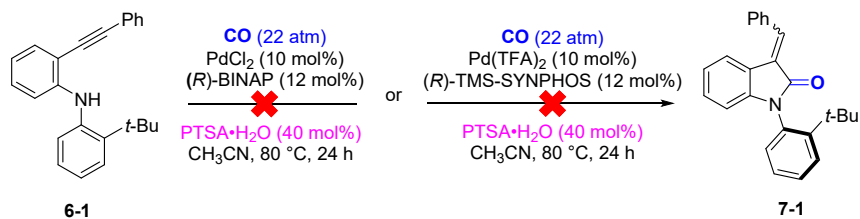

## 2.8 Procedures for the derivatization of 7-1 and Characterization

*Procedures for 8-1 (Scheme S2):*<sup>3</sup> An oven-dried 10 mL Schlenk tube was charged with **7-1** (35.3 mg, 0.1 mmol), DABCO (5.6 mg, 0.05 mmol, 50 mol%), ethyl 2,3-butadienoate (35  $\mu$ L, 0.3 mmol, 3.0 eq.), and dry toluene (2 mL). The reaction mixture was stirred at rt for 48 h. And then the crude reaction mixture was concentrated in vacuo, the residue was purified by silica gel flash column chromatography (hexane/EtOAc) to give **8-1**.

*Procedures for 8-2 (Scheme S2):*<sup>4</sup> A oven-dried 10 mL Schlenk tube was charged with PdCl<sub>2</sub> (0.9 mg, 0.005 mmol, 5 mol%), NaH (60% in oil) (8 mg, 0.2 mmol, 2.0 eq.), and DMA (1.0 mL). Then, the reaction mixture was stirred at room temperature for 5 min under Ar until the mixture turned black, **7-1** (35.3 mg, 0.1 mmol) in DMA (0.5 mL) was added through syringe. And then, the reaction was stirred at rt for 1 h. After the reaction was completed monitored by TLC, the mixture was quenched with NH<sub>4</sub>Cl aq and extracted with EtOAc (10 mL  $\times$  3). Then, the combined organic layers were washed with brine, dried over anhydrous Na<sub>2</sub>SO<sub>4</sub>, and concentrated under reduced pressure. The residue was purified by flash chromatography on silica gel (hexane/EtOAc) to give **8-2**.

*Procedures for 8-3 (Scheme S2):*<sup>4</sup> A oven-dried 10 mL Schlenk tube was charged with PdCl<sub>2</sub> (0.9 mg, 0.005 mmol, 5 mol%), NaH (60% in oil) (8 mg, 0.2 mmol, 2.0 eq.), and DMA (1.0 mL). Then, the reaction mixture was stirred at room temperature for 5 min under Ar until the mixture turned black, **7-1** (35.3 mg, 0.1 mmol) in DMA (0.5 mL) was added through syringe. And then, the reaction was stirred at rt for 1 h. When the starting material was consumed monitored with TLC, BnBr (18  $\mu$ L, 0.15 mmol, 1.5 eq.) was added through micro syringe and continue to stir for 20 min. Then the mixture was quenched with NH<sub>4</sub>Cl aq and extracted with EtOAc (10 mL  $\times$  3), and the combined organic layers were washed with brine, dried over anhydrous Na<sub>2</sub>SO<sub>4</sub>, and concentrated under reduced pressure. The residue was purified by flash chromatography on silica gel (hexane/EtOAc) to give **8-3**.



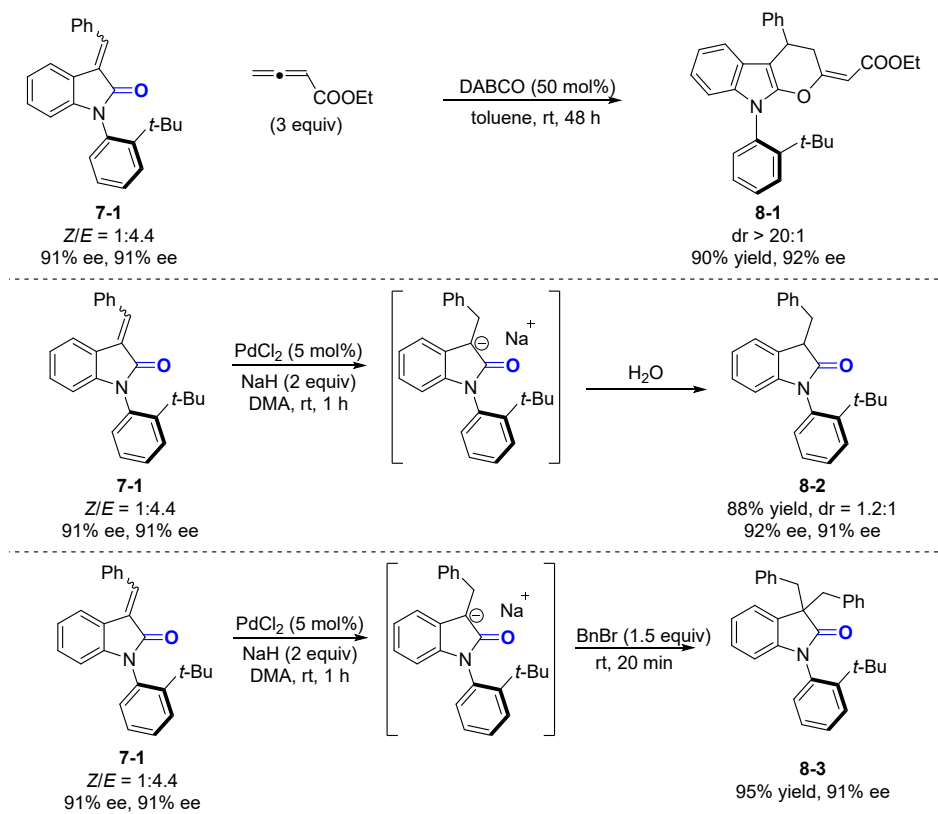

**Scheme S2.** The derivatization of **7-1**

## Characterization of Products 8

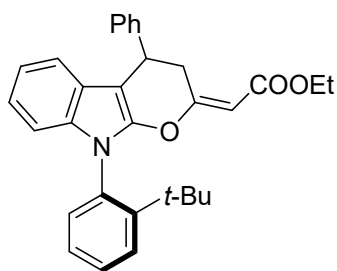

ethyl (*E*)-2-(9-(2-(*tert*-butyl)phenyl)-4-phenyl-4,9-dihydropyrano[2,3-*b*]indol-2(3*H*)-ylidene)acetate (**8-1**)

Pale yellow solid (41.9 mg, 90% yield, dr > 20:1, 92% ee).  $[\alpha]_D^{25} = +71.8$  (c = 0.17 in MeOH).  $^1\text{H NMR}$  (500 MHz,  $\text{CDCl}_3$ )  $\delta$  = 7.70 (dd,  $J$  = 8.2, 1.5 Hz, 1H), 7.49 (td,  $J$  = 8.2, 7.8, 1.6 Hz, 1H), 7.38 – 7.30 (m, 5H), 7.29 – 7.25 (m, 1H), 7.07 (dd,  $J$  = 7.8, 1.6 Hz, 1H), 7.02 (ddd,  $J$  = 8.1, 6.9, 1.6 Hz, 1H), 6.98 (td,  $J$  = 7.4, 6.9, 1.3 Hz, 1H), 6.95 (dd,  $J$  = 7.8, 1.6 Hz, 1H), 6.85 – 6.77 (m, 1H), 5.63 (s, 1H), 4.49 – 4.38 (m, 1H), 4.11 (tq,  $J$  = 7.1, 3.5 Hz, 2H), 3.79 (dd,  $J$  = 15.2, 6.0 Hz, 1H), 3.57 (dd,  $J$  = 15.2, 7.2 Hz, 1H), 1.22 (d,  $J$  = 3.8 Hz, 12H).  $^{13}\text{C NMR}$  (126 MHz,  $\text{CDCl}_3$ )  $\delta$  = 166.6, 165.8, 149.6, 146.7, 142.7, 135.0, 133.0, 132.0, 129.4, 128.7, 128.5, 127.7, 127.0, 126.8, 125.1, 120.4, 120.3, 118.1, 111.0, 102.1, 91.6, 59.9, 35.8, 35.6, 32.7, 31.6, 14.2.

**HRMS (ESI)**: calcd for  $\text{C}_{31}\text{H}_{32}\text{NO}_3$   $[\text{M}+\text{H}]^+$  466.2378; found 466.2381.

The ee was determined by Daicel Chiralcel OD-H (0.46 cm x 25 cm), hexane/isopropanol = 99/1, 0.5 mL/min,  $\lambda$  = 254 nm,  $t_R$  (minor) = 11.334 min,  $t_R$  (major) = 10.529 min.

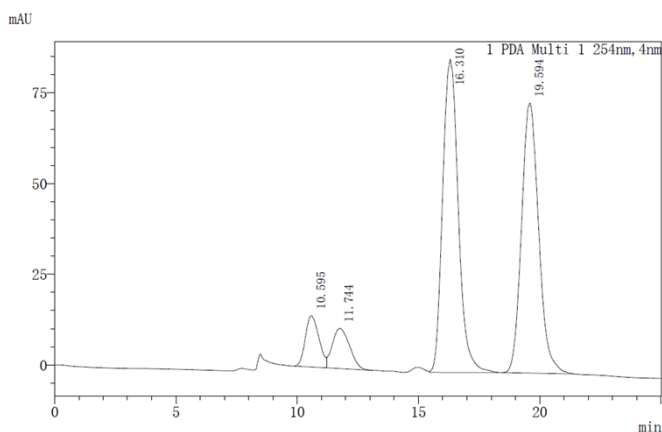

| PDA Ch1 254nm |           |              |                |             |                 |
|---------------|-----------|--------------|----------------|-------------|-----------------|
| NO.           | Ret. Time | Height (uAU) | Area (uAU*min) | Rel. Area % | Resolution(USP) |
| 1             | 10.595    | 14194        | 552131         | 6.388       | —               |
| 2             | 11.744    | 11120        | 547643         | 6.337       | 0.957           |
| 3             | 16.310    | 86368        | 3885355        | 44.956      | 3.702           |
| 4             | 19.594    | 74455        | 3657457        | 42.319      | 2.742           |

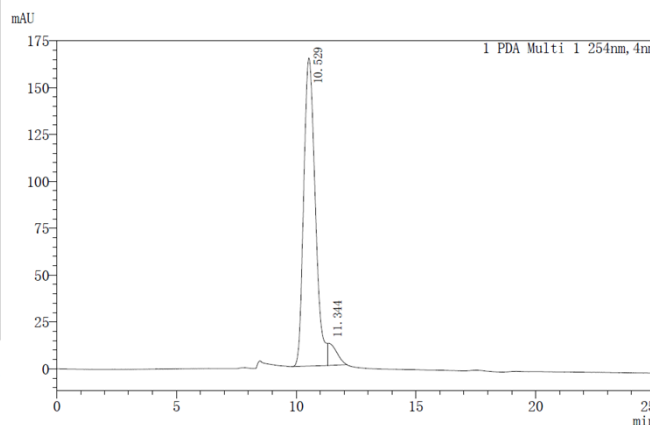

| PDA Ch1 254nm |           |              |                |             |                 |
|---------------|-----------|--------------|----------------|-------------|-----------------|
| NO.           | Ret. Time | Height (uAU) | Area (uAU*min) | Rel. Area % | Resolution(USP) |
| 1             | 10.529    | 164388       | 5521055        | 95.058      | —               |
| 2             | 11.344    | 11754        | 287025         | 4.942       | —               |

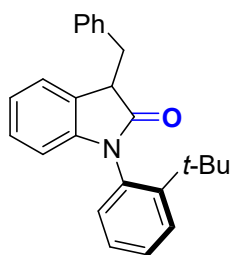

### 3-benzyl-1-(2-(*tert*-butyl)phenyl)indolin-2-one (**8-2**)

Pale yellow oil (31.2 mg, 88% yield, dr = 1.2:1, 92% ee, 91% ee). *cis* or *trans*:  $[\alpha]_D^{25} = +20.9$  (c = 0.22 in MeOH).  $^1\text{H NMR}$  (500 MHz,  $\text{CDCl}_3$ )  $\delta = 7.63$  (dd,  $J = 8.1, 1.5$  Hz, 1H), 7.41 (td,  $J = 7.7, 1.6$  Hz, 1H), 7.32 (qd,  $J = 7.4, 2.7$  Hz, 3H), 7.28 (dt,  $J = 5.9, 1.5$  Hz, 3H), 7.15 – 7.10 (m, 1H), 6.99 (dd,  $J = 7.8, 1.5$  Hz, 1H), 6.90 (td,  $J = 7.5, 1.1$  Hz, 1H), 6.66 (d,  $J = 7.4$  Hz, 1H), 6.30 (d,  $J = 7.8$  Hz, 1H), 3.88 (dd,  $J = 10.6, 4.3$  Hz, 1H), 3.65 (dd,  $J = 13.6, 4.4$  Hz, 1H), 2.87 (dd,  $J = 13.6, 10.5$  Hz, 1H), 1.25 (s, 9H).  $^{13}\text{C NMR}$  (126 MHz,  $\text{CDCl}_3$ )  $\delta = 177.6, 149.4, 146.7, 138.2, 133.5, 131.3, 129.6, 129.3, 128.8, 128.5, 128.4, 128.0, 127.9, 126.8, 124.7, 122.1, 110.7, 47.9, 37.0, 35.6, 31.6$ . *cis* or *trans*:  $[\alpha]_D^{25} = +23.2$  (c = 0.19 in MeOH).  $^1\text{H NMR}$  (500 MHz,  $\text{CDCl}_3$ )  $\delta = 7.58$  (dd,  $J = 8.2, 1.5$  Hz, 1H), 7.35 (ddd,  $J = 8.3, 7.3, 1.6$  Hz, 1H), 7.24 – 7.19 (m, 3H), 7.17 (td,  $J = 7.5, 1.5$  Hz, 1H), 7.15 – 7.08 (m, 4H), 6.99 (td,  $J = 7.5, 1.1$  Hz, 1H), 6.20 (td,  $J = 6.8, 6.3, 1.4$  Hz, 2H), 3.92 (dd,  $J = 7.5, 4.2$  Hz, 1H), 3.50 (dd,  $J = 13.6, 4.2$  Hz, 1H), 3.27 (dd,  $J = 13.6, 7.5$  Hz, 1H), 1.28 (s, 9H).  $^{13}\text{C NMR}$  (126 MHz,  $\text{CDCl}_3$ )  $\delta = 177.8, 149.3, 146.6, 137.2, 133.0, 130.9, 129.9, 129.2, 128.8, 128.1, 128.0, 127.9, 127.8, 126.6, 124.3, 122.2, 110.5, 47.1, 36.3, 35.6, 31.6$ .

**HRMS (ESI)**: calcd for  $\text{C}_{25}\text{H}_{26}\text{NO}$   $[\text{M}+\text{H}]^+$  356.2009; found 356.2007.

The ee was determined by Daicel Chiralcel AD-H (0.46 cm x 25 cm), hexane/isopropanol = 98/2, 1 mL/min,  $\lambda = 254$  nm,  $t_R$  (minor) = 10.439/18.925 min,  $t_R$  (major) = 9.862/30.372 min.

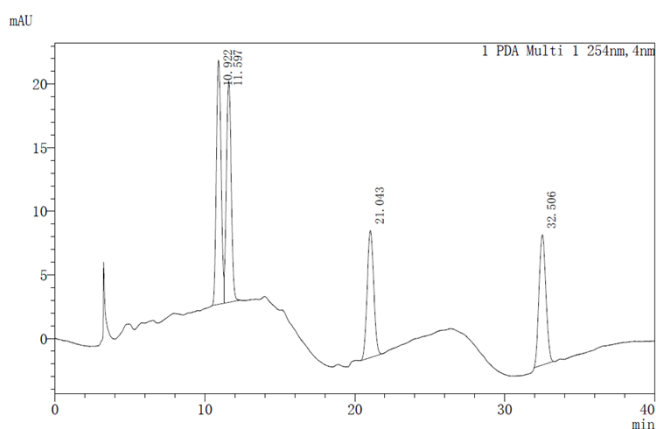

| PDA Ch1 254nm |           |              |                |             |                  |
|---------------|-----------|--------------|----------------|-------------|------------------|
| NO.           | Ret. Time | Height (uAU) | Area (uAU*min) | Rel. Area % | Resolution (USP) |
| 1             | 10.922    | 19182        | 421226         | 29.237      | —                |
| 2             | 11.597    | 17396        | 389570         | 27.039      | 1.141            |
| 3             | 21.043    | 9996         | 303101         | 21.038      | 13.430           |
| 4             | 32.506    | 10231        | 326848         | 22.686      | 13.691           |

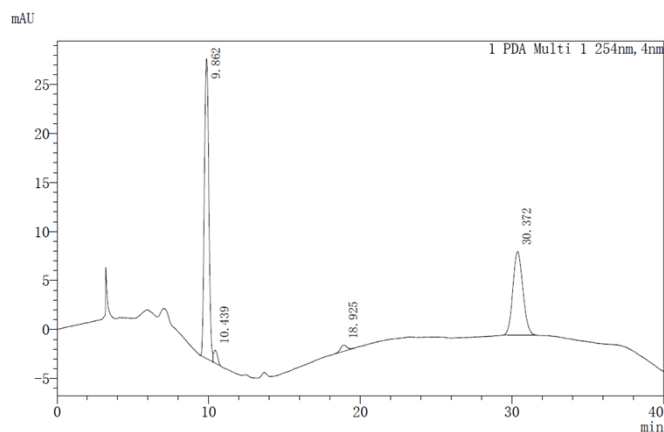

| PDA Ch1 254nm |           |              |                |             |                  |
|---------------|-----------|--------------|----------------|-------------|------------------|
| NO.           | Ret. Time | Height (uAU) | Area (uAU*min) | Rel. Area % | Resolution (USP) |
| 1             | 9.862     | 30614        | 618394         | 58.810      | —                |
| 2             | 10.439    | 1320         | 22836          | 2.172       | 0.994            |
| 3             | 18.925    | 622          | 18221          | 1.733       | 12.270           |
| 4             | 30.372    | 8528         | 392055         | 37.285      | 11.547           |

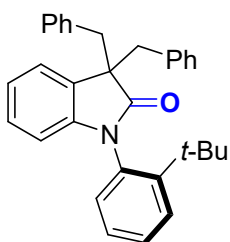

**3,3-dibenzyl-1-(2-(*tert*-butyl)phenyl)indolin-2-one (8-3)**

Pale yellow solid (42.3 mg, 95% yield, 91% ee).  $[\alpha]_D^{25} = +13.3$  ( $c = 0.09$  in MeOH).  $^1\text{H NMR}$  (500 MHz,  $\text{CDCl}_3$ )  $\delta = 7.44$  (dd,  $J = 8.1, 1.6$  Hz, 1H), 7.32 (dd,  $J = 7.3, 1.5$  Hz, 1H), 7.25 – 7.22 (m, 1H), 7.21 – 7.14 (m, 6H), 7.12 (td,  $J = 7.4, 1.3$  Hz, 1H), 7.07 (td,  $J = 7.7, 2.0$  Hz, 3H), 6.93 (td,  $J = 7.6, 1.5$  Hz, 1H), 6.83 (dd,  $J = 7.8, 1.4$  Hz, 2H), 5.95 (dd,  $J = 7.5, 1.2$  Hz, 1H), 5.10 (dd,  $J = 7.8, 1.5$  Hz, 1H), 3.46 (d,  $J = 13.3$  Hz, 1H), 3.41 (d,  $J = 12.7$  Hz, 1H), 3.33 (d,  $J = 13.3$  Hz, 1H), 3.24 (d,  $J = 12.7$  Hz, 1H), 1.00 (s, 9H).  $^{13}\text{C NMR}$  (126 MHz,  $\text{CDCl}_3$ )  $\delta = 178.7, 149.5, 146.7, 136.1, 135.8, 134.0, 131.2, 131.0, 130.6, 130.2, 128.8, 128.1, 127.9, 127.8, 127.7, 127.6, 126.7, 126.5, 124.4, 121.8, 111.0, 56.3, 44.8, 42.9, 35.0, 31.2$ .

**HRMS (ESI):** calcd for  $\text{C}_{32}\text{H}_{32}\text{NO}$   $[\text{M}+\text{H}]^+ 446.2478$ ; found 446.2481.

The ee was determined by Daicel Chiralcel AD-H (0.46 cm x 25 cm), hexane/isopropanol = 90/10, 1 mL/min,  $\lambda = 254$  nm,  $t_R$  (minor) = 6.394 min,  $t_R$  (major) = 5.654 min.

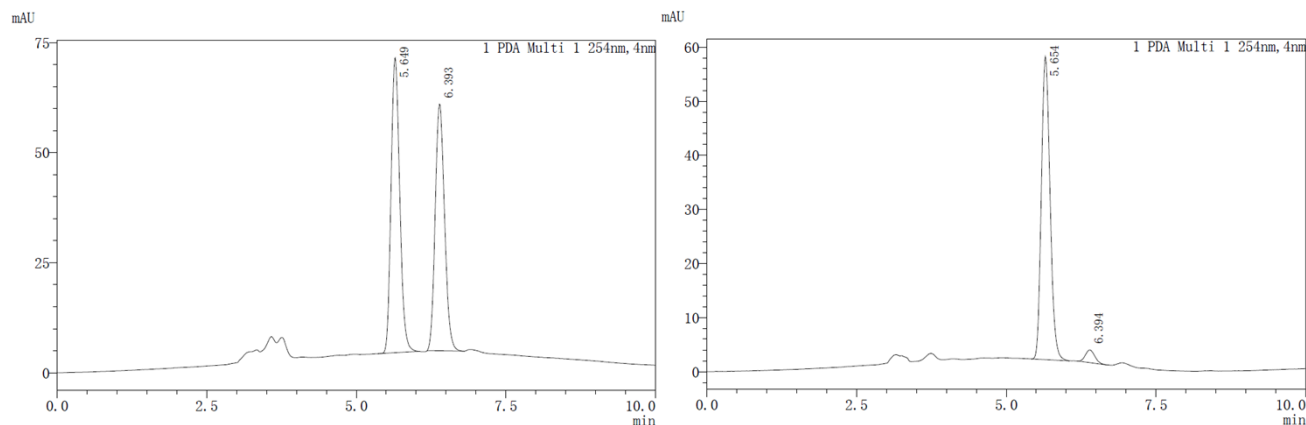

| PDA Ch1 254nm |           |              |                |             |                  | PDA Ch1 254nm |           |              |                |             |                  |
|---------------|-----------|--------------|----------------|-------------|------------------|---------------|-----------|--------------|----------------|-------------|------------------|
| NO.           | Ret. Time | Height (uAU) | Area (uAU*min) | Rel. Area % | Resolution (USP) | NO.           | Ret. Time | Height (uAU) | Area (uAU*min) | Rel. Area % | Resolution (USP) |
| 1             | 5.649     | 67024        | 677583         | 52.618      | ---              | 1             | 5.654     | 56077        | 566347         | 95.712      | ---              |
| 2             | 6.393     | 55983        | 610164         | 47.382      | 2.578            | 2             | 6.394     | 2344         | 25375          | 4.288       | 2.546            |

## 2.9 Procedures for the Deuterium experiments.

*Procedures for synthesis of phenylsilane-d3 (Scheme S3):*<sup>5</sup> A oven-dried 25 mL Schlenk tube was charged with LiAlD<sub>4</sub> (262 mg, 6.24 mmol, 1.0 eq.), the above-mentioned mixture was degassed and refilled with Ar for 3 times, and dry Et<sub>2</sub>O (6 mL) was added to the mixture by syringe. Then the reaction was cooled to 0 °C with stirring, and PhSiCl<sub>3</sub> (1.0 mL, 6.24 mmol) was added dropwise. And the reaction mixture was warmed to rt and then refluxed for 3 h at 45 °C. The reaction mixture was then cooled to 0 °C again, where it was carefully quenched with ice cold H<sub>2</sub>O. The organic layer was separated and held at 0 °C and the aqueous layer extracted with ice-cold Et<sub>2</sub>O (10 mL) at 0 °C. The organic layers were combined, washed with ice-cold brine at 0 °C, dried over MgSO<sub>4</sub>, and concentrated under reduced pressure at 0 °C at 40 mbar to furnish pure PhSiD<sub>3</sub> as a colorless oil (880 mg, 57 wt% solution in Et<sub>2</sub>O, D: >95%, 72% yield).

*General procedures for deuterated experiments a to e (Scheme S3):* An oven-dried 10 mL Schlenk tube was charged with 1,2-diphenylethyne (17.8 mg, 0.1 mmol), PdCl<sub>2</sub> (1.8 mg, 0.01 mmol, 10 mol%), BINAP (6.2 mg, 0.01 mmol, 10 mol%), the above-mentioned mixture was degassed and refilled with CO for 3 times. Then, a solution of aniline (11 μL, 0.12 mmol, 1.2 eq.) and Et<sub>3</sub>SiH (50 μL, 0.3 mmol, 3.0 eq.) in 2 mL of dry CH<sub>3</sub>CN were added to the mixture by syringe. Finally, the mixture was stirred at 80 °C for 24 h under CO balloon. After completion of the reaction, the crude reaction mixture was concentrated in vacuo and the residue was purified by silica gel flash column chromatography (hexane/EtOAc) to give products.

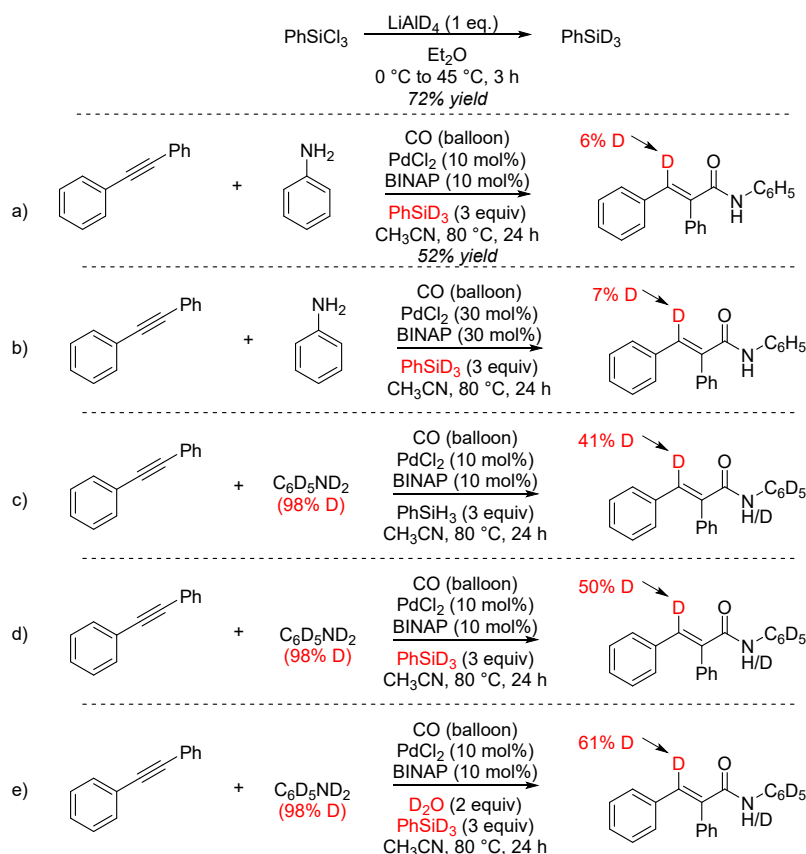

**Scheme S3.** Deuterated experiments.

The deuterated rate based on <sup>1</sup>H NMR identification (Figure S1). When deuterated phenylsilanes was used, only a very low deuteration rate was observed in the product (Figure S1a, 6% D). However, when deuterated aniline substrates were used, higher

deuteration rates were observed in the product (Figure S1c, 41% D). Furthermore, when we used both deuterated phenylsilane and deuterated aniline under the same conditions, it was observed that the product contained 50% D (Figure S1d), which is approximately equal to the sum of the above two terms. These results indicated that most of the hydrogen on the olefins in the product came from the aminolysis process involving aniline, and a small part came from hydrosilane. When we further added deuterated water to the reaction system, the deuteration rate in the product increased (Figure S1e, 61% D). However, the reason why the deuteration rate in the product is always lower than the theoretical value is due to the rapid H/D exchange between the active H (probably water) in the reaction system and the deuterated aniline. It is worth mentioning that when we increase the amount of catalyst and ligand to 30 mol%, the deuteration rate in the product does not increase basically (Figure S1b, 7% D). This indicates that the step of palladium catalyst and hydrosilane to form Pd-H species is slower than the latter step, which may be the rate-determining step for the entire reaction.

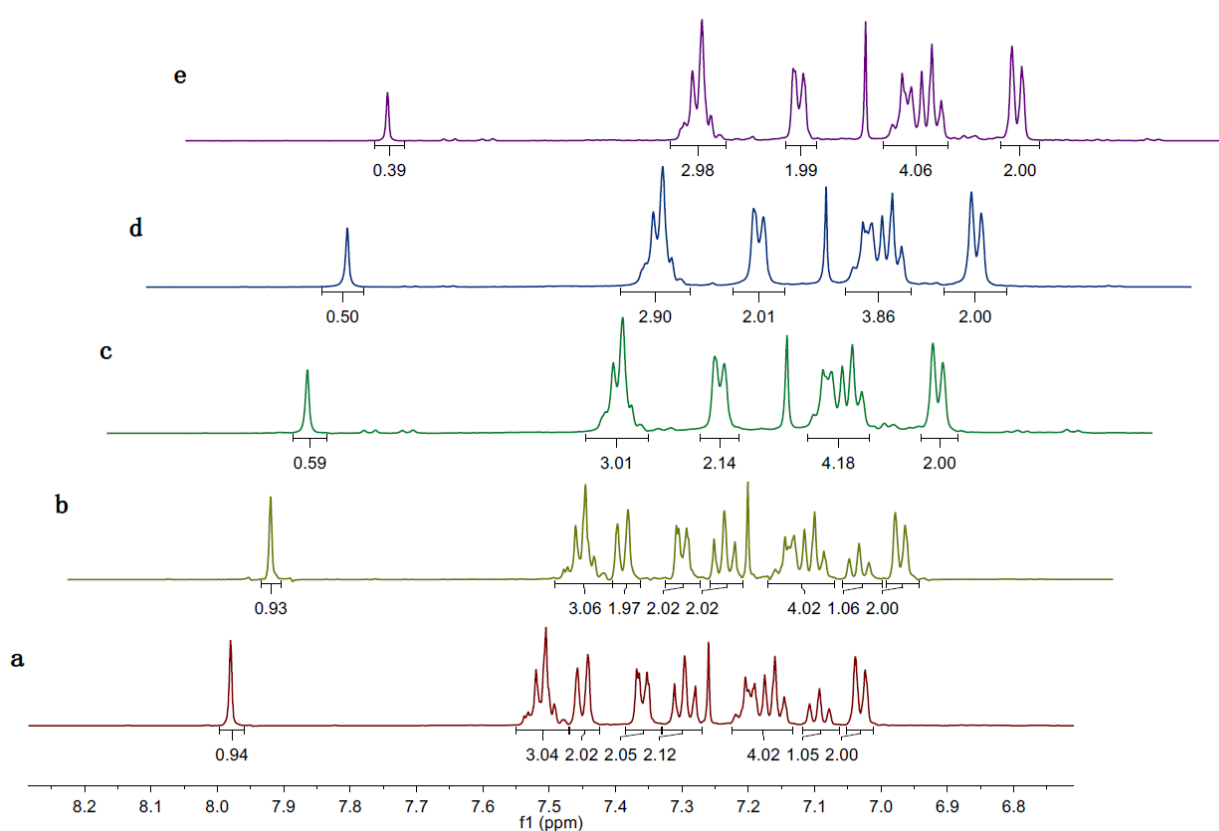

**Figure S1.**  $^1\text{H}$  NMR of the product of deuterated experiments.

## 2.10 Racemization Studies of 7-1

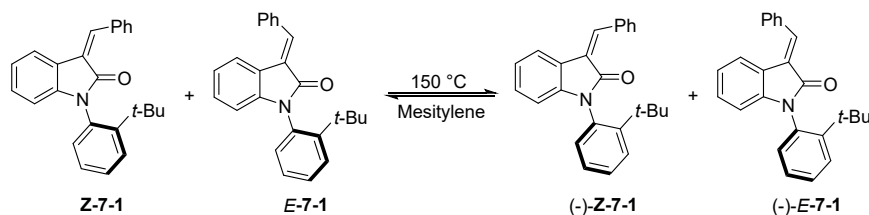

*Procedures for thermal racemization of 7-1:* A solution of **7-1** (10 mg, 49.2% ee, 48.8% ee, Z/E = 1:4.3) in dry mesitylene (2 mL) was heated at 150 °C. At intervals, small samples were taken and the solvent was removed by evaporation. The ee and Z/E ratio were determined by HPLC (HPLC conditions: CHIRALPAK AD-H, hexane/isopropanol = 90:10, flow: 1.0 mL/min,  $\lambda = 254$  nm).

In order to explore the enantiomerization process in this study, the activation barriers of the enantiomerization process for typical product (**7-1**) was investigated computationally. The activation barrier ( $\Delta G^\ddagger$ ) for the enantiomerization process was obtained as the Gibbs free energy difference from the ground-state structure to the corresponding transition state. The rate constant for enantiomerization ( $k_{ent}$ ) was calculated based on the following equation, where the transmission coefficient  $\kappa$  is set as 1, Boltzmann constant  $k_B = 1.3806503 \times 10^{-23}$  J/K, Planck constant  $h = 6.62606876 \times 10^{-34}$  J·s, idea gas constant  $R = 8.314472$  J/(mol·K),  $T = 423.15$  K.<sup>6</sup>

$$k_{ent} = \kappa \frac{k_B T}{h} \exp\left(-\frac{\Delta G^\ddagger}{RT}\right)$$

The integrated first order rate law is

$$\ln[R_t] = -k_{ent}t + \ln[R_0]$$

$$\ln(R_0/R_t) = \ln[(1 + ee_0)/(1 + ee_t)]$$

A plot of  $\ln(R_0/R_t)$  vs. time  $t$  gives a straight line with a slope of  $k_{ent}$  (**Figure S2**)

The rates for the isomerization of **7-1** in mesitylene was calculated as shown in **Table S4**

**Table S4.** Thermal Racemization of **7-1**

| time (S) | (Z) ee % | (E) ee % | Z/E   | (Z) $\ln[(1+ee_0)/(1+ee_t)]$ | (E) $\ln[(1+ee_0)/(1+ee_t)]$ |
|----------|----------|----------|-------|------------------------------|------------------------------|
| 0        | 49.2     | 48.8     | 1/4.3 | 0                            | 0                            |
| 86400    | 45.7     | 45.0     | 1/4.1 | 0.023737975                  | 0.02586938                   |
| 172800   | 41.5     | 41.5     | 1/4.1 | 0.052987971                  | 0.050303405                  |
| 259200   | 39.1     | 38.9     | 1/4.0 | 0.070094589                  | 0.068848873                  |
| 345600   | 36.5     | 35.8     | 1/3.3 | 0.088963073                  | 0.091419907                  |
| 432000   | 32.6     | 31.4     | 1/3.7 | 0.11795061                   | 0.124357016                  |
| 518400   | 30.8     | 28.8     | 1/3.8 | 0.131618249                  | 0.144342309                  |

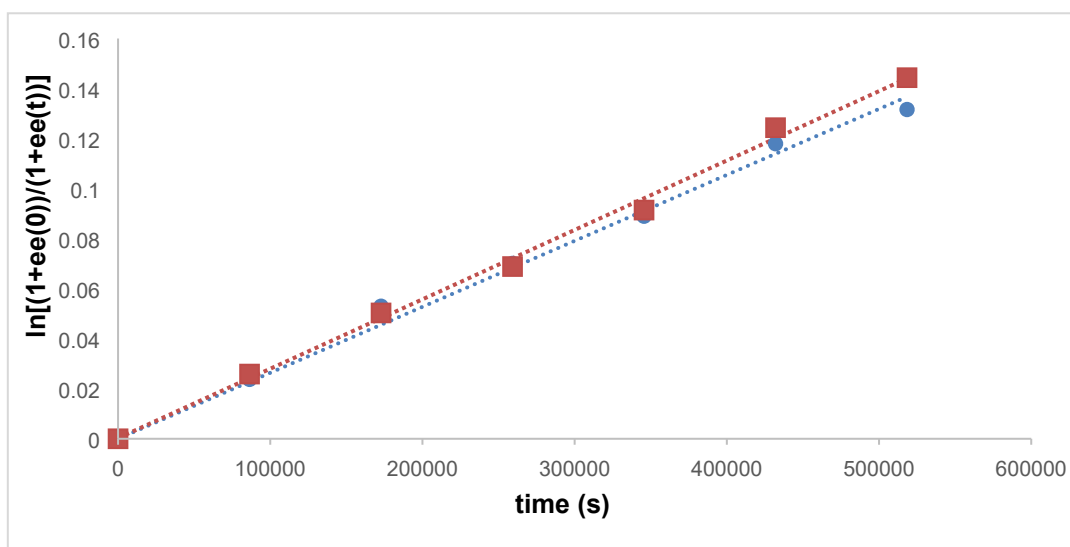

**Figure S2.** The plot of  $\ln(R_0/R_t)$  versus time  $t$  at 423.15 K for 7-1

Therefore:

$$k_{ent} = 3.0 \times 10^{-7} \text{ s}^{-1}$$

$$k_{rac} = 2k_{ent} = 6.0 \times 10^{-7} \text{ s}^{-1}$$

$$t_{1/2rac} = \frac{\ln 2}{k_{rac}}$$

$$= 1.16 \times 10^6 \text{ s} = 320.9 \text{ h}$$

Employing the Eyring equation:

$$\Delta G^\ddagger = -RT \ln\left(\frac{k_{ent} \times h}{k_B T}\right)$$

$$= 157.7 \text{ kJ/mol} = 37.7 \text{ kcal/mol}$$



### 3. X-ray Crystal Structure of (E)-7-12 and (E)-7-23

Single crystals of (E)-7-12 were obtained by recrystallization from DCM. The molecular structure and X-ray diffractonal data/refinement of (E)-7-12 were shown below.

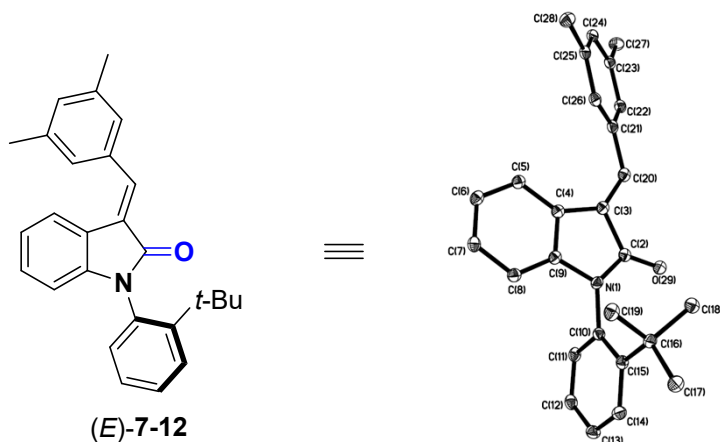

|                                             |                                                               |
|---------------------------------------------|---------------------------------------------------------------|
| Identification code                         | chenzhh_A2_220427_auto                                        |
| Empirical formula                           | C <sub>27</sub> H <sub>27</sub> NO                            |
| Formula weight                              | 381.49                                                        |
| Temperature/K                               | 100.00(10)                                                    |
| Crystal system                              | orthorhombic                                                  |
| Space group                                 | P2 <sub>1</sub> 2 <sub>1</sub> 2 <sub>1</sub>                 |
| a/Å                                         | 7.78370(10)                                                   |
| b/Å                                         | 31.1021(4)                                                    |
| c/Å                                         | 8.64470(10)                                                   |
| α/°                                         | 90                                                            |
| β/°                                         | 90                                                            |
| γ/°                                         | 90                                                            |
| Volume/Å <sup>3</sup>                       | 2092.79(5)                                                    |
| Z                                           | 4                                                             |
| ρ <sub>calc</sub> /cm <sup>3</sup>          | 1.211                                                         |
| μ/mm <sup>-1</sup>                          | 0.558                                                         |
| F(000)                                      | 816.0                                                         |
| Crystal size/mm <sup>3</sup>                | 0.450 × 0.400 × 0.300                                         |
| Radiation                                   | Cu Kα (λ = 1.54184)                                           |
| 2θ range for data collection/°              | 5.684 to 157.946                                              |
| Index ranges                                | -7 ≤ h ≤ 9, -38 ≤ k ≤ 39, -10 ≤ l ≤ 10                        |
| Reflections collected                       | 20246                                                         |
| Independent reflections                     | 4366 [R <sub>int</sub> = 0.0570, R <sub>sigma</sub> = 0.0323] |
| Data/restraints/parameters                  | 4366/0/268                                                    |
| Goodness-of-fit on F <sup>2</sup>           | 1.061                                                         |
| Final R indexes [I ≥ 2σ (I)]                | R <sub>1</sub> = 0.0471, wR <sub>2</sub> = 0.1222             |
| Final R indexes [all data]                  | R <sub>1</sub> = 0.0484, wR <sub>2</sub> = 0.1231             |
| Largest diff. peak/hole / e Å <sup>-3</sup> | 0.26/-0.27                                                    |
| Flack parameter                             | -0.04 (19)                                                    |

Single crystals of (*E*)-**7-23** were obtained by recrystallization from DCM. The molecular structure and X-ray diffractational data/refinement of (*E*)-**7-23** were shown below.

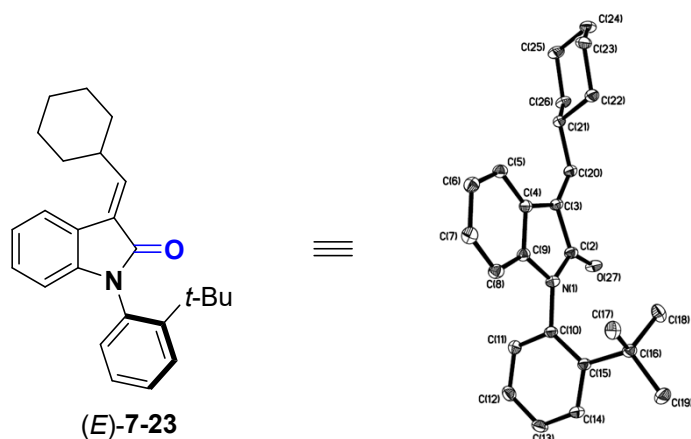


---

|                                             |                                                               |
|---------------------------------------------|---------------------------------------------------------------|
| Identification code                         | chenzh_h_B1_220427_auto                                       |
| Empirical formula                           | C <sub>25</sub> H <sub>29</sub> NO                            |
| Formula weight                              | 359.49                                                        |
| Temperature/K                               | 100.00(10)                                                    |
| Crystal system                              | monoclinic                                                    |
| Space group                                 | P2 <sub>1</sub>                                               |
| a/Å                                         | 11.2000(2)                                                    |
| b/Å                                         | 7.87450(10)                                                   |
| c/Å                                         | 11.8582(2)                                                    |
| α/°                                         | 90                                                            |
| β/°                                         | 103.2920(10)                                                  |
| γ/°                                         | 90                                                            |
| Volume/Å <sup>3</sup>                       | 1017.81(3)                                                    |
| Z                                           | 2                                                             |
| ρ <sub>calc</sub> /cm <sup>3</sup>          | 1.173                                                         |
| μ/mm <sup>-1</sup>                          | 0.539                                                         |
| F(000)                                      | 388.0                                                         |
| Crystal size/mm <sup>3</sup>                | 0.25 × 0.2 × 0.15                                             |
| Radiation                                   | Cu Kα (λ = 1.54184)                                           |
| 2θ range for data collection/°              | 7.66 to 157.59                                                |
| Index ranges                                | -14 ≤ h ≤ 14, -9 ≤ k ≤ 8, -14 ≤ l ≤ 15                        |
| Reflections collected                       | 20056                                                         |
| Independent reflections                     | 4023 [R <sub>int</sub> = 0.0323, R <sub>sigma</sub> = 0.0205] |
| Data/restraints/parameters                  | 4023/1/278                                                    |
| Goodness-of-fit on F <sup>2</sup>           | 1.083                                                         |
| Final R indexes [I ≥ 2σ (I)]                | R <sub>1</sub> = 0.0312, wR <sub>2</sub> = 0.0800             |
| Final R indexes [all data]                  | R <sub>1</sub> = 0.0317, wR <sub>2</sub> = 0.0804             |
| Largest diff. peak/hole / e Å <sup>-3</sup> | 0.11/-0.17                                                    |
| Flack parameter                             | 0.08(10)                                                      |

---

#### 4. References

- 1 N. Ototake, Y. Morimoto, A. Mokuaya, H. Fukaya, Y. Shida and O. Kitagawa, *Chem. Eur. J.*, 2010, **16**, 6752-6755.
- 2 H.-J. Ai, W. Lu and X.-F. Wu, *Angew. Chem. Int. Ed.*, 2021, **60**, 17178-17184
- 3 X.-Y. Chen, M.-W. Wen, S. Ye and Z.-X. Wang, *Org. Lett.*, 2011, **13**, 1138-1141.
- 4 Y. Liu, Y. Mao, Y. Hu, J. Gui, L. Wang, W. Wang and S. Zhang, *Adv. Synth. Catal.*, 2019, **361**, 1554-1558.
- 5 T. Zhang, M. Yu and H. Huang, *Chem. Sci.*, 2021, **12**, 10501-10505.
- 6 (a) C. He, M. Hou, Z. Zhu and Z. Gu, *ACS Catal.*, 2017, **7**, 5316-5320; (b) Q. Wang, W.-W. Zhang, C. Zheng, Q. Gu and S.-L. You, *J. Am. Chem. Soc.*, 2021, **143**, 114-120.

## 5. NMR Spectra.

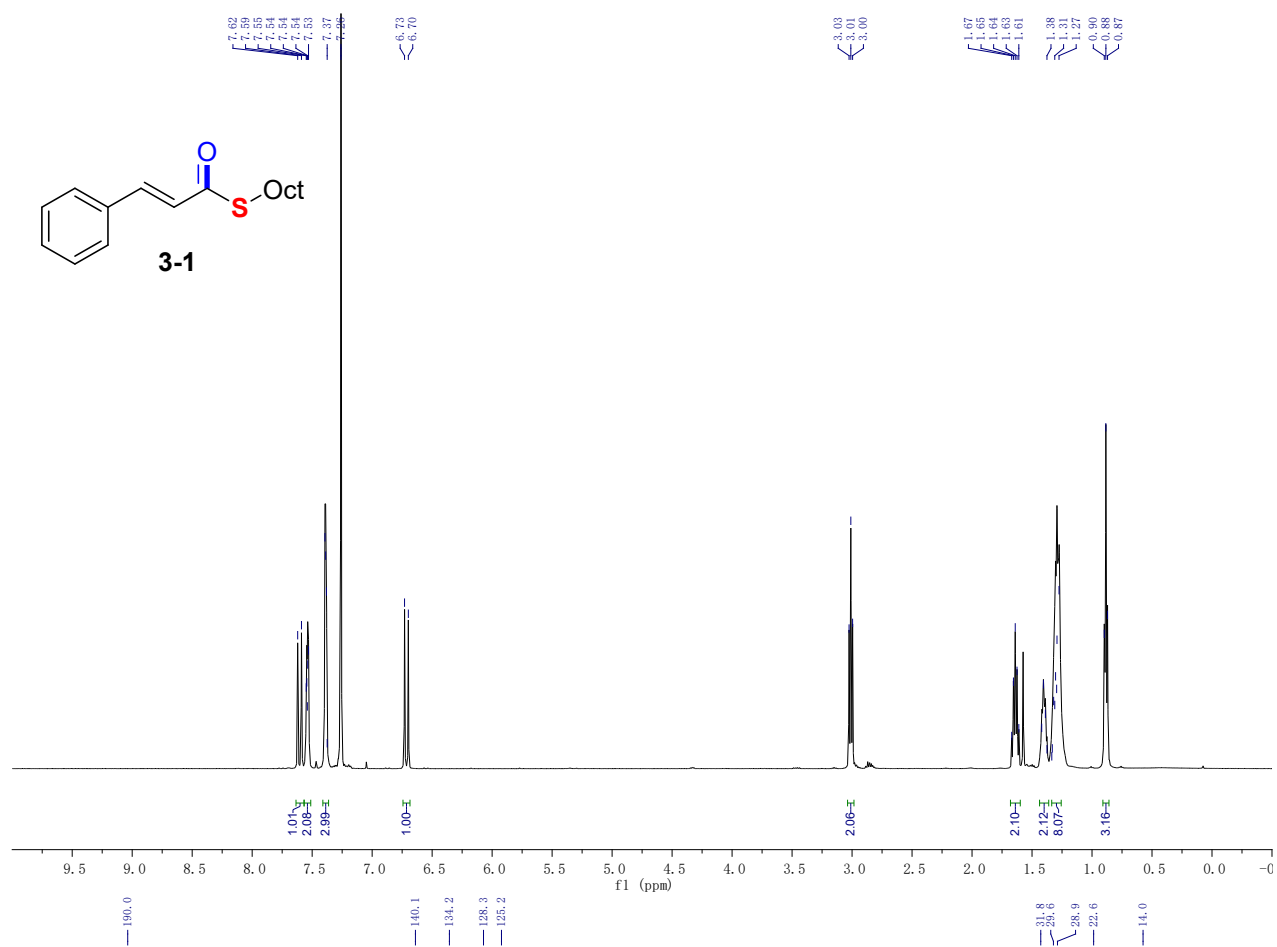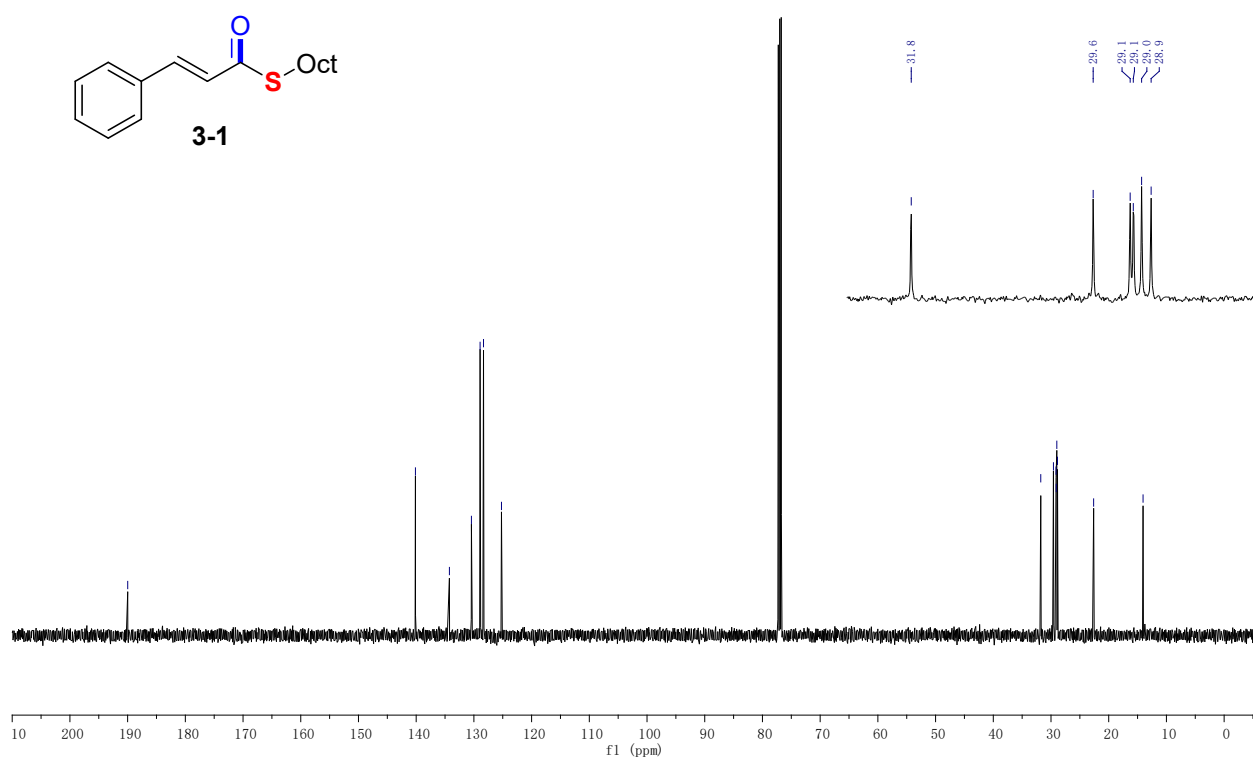

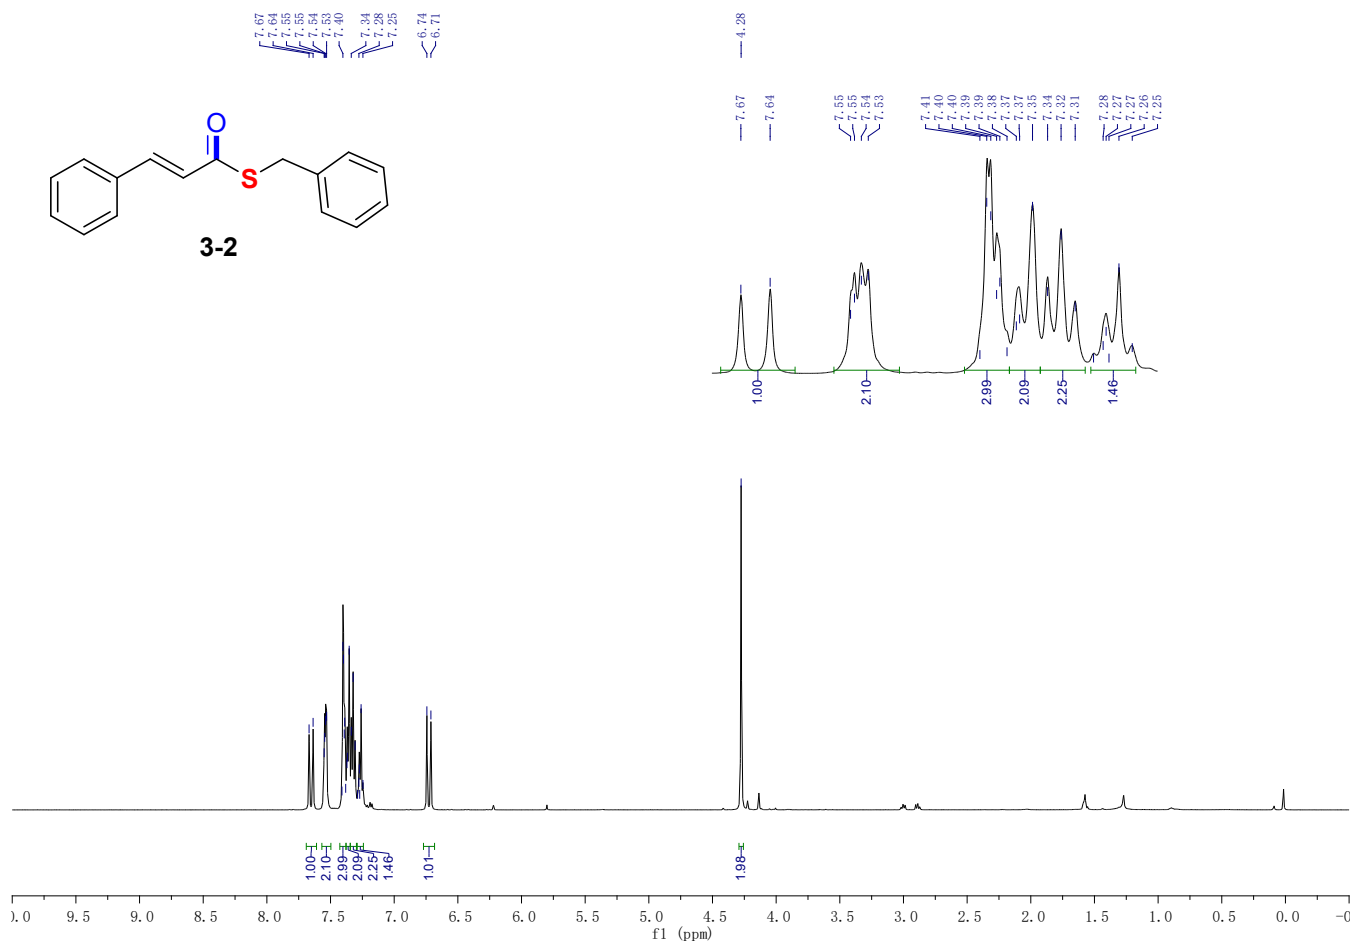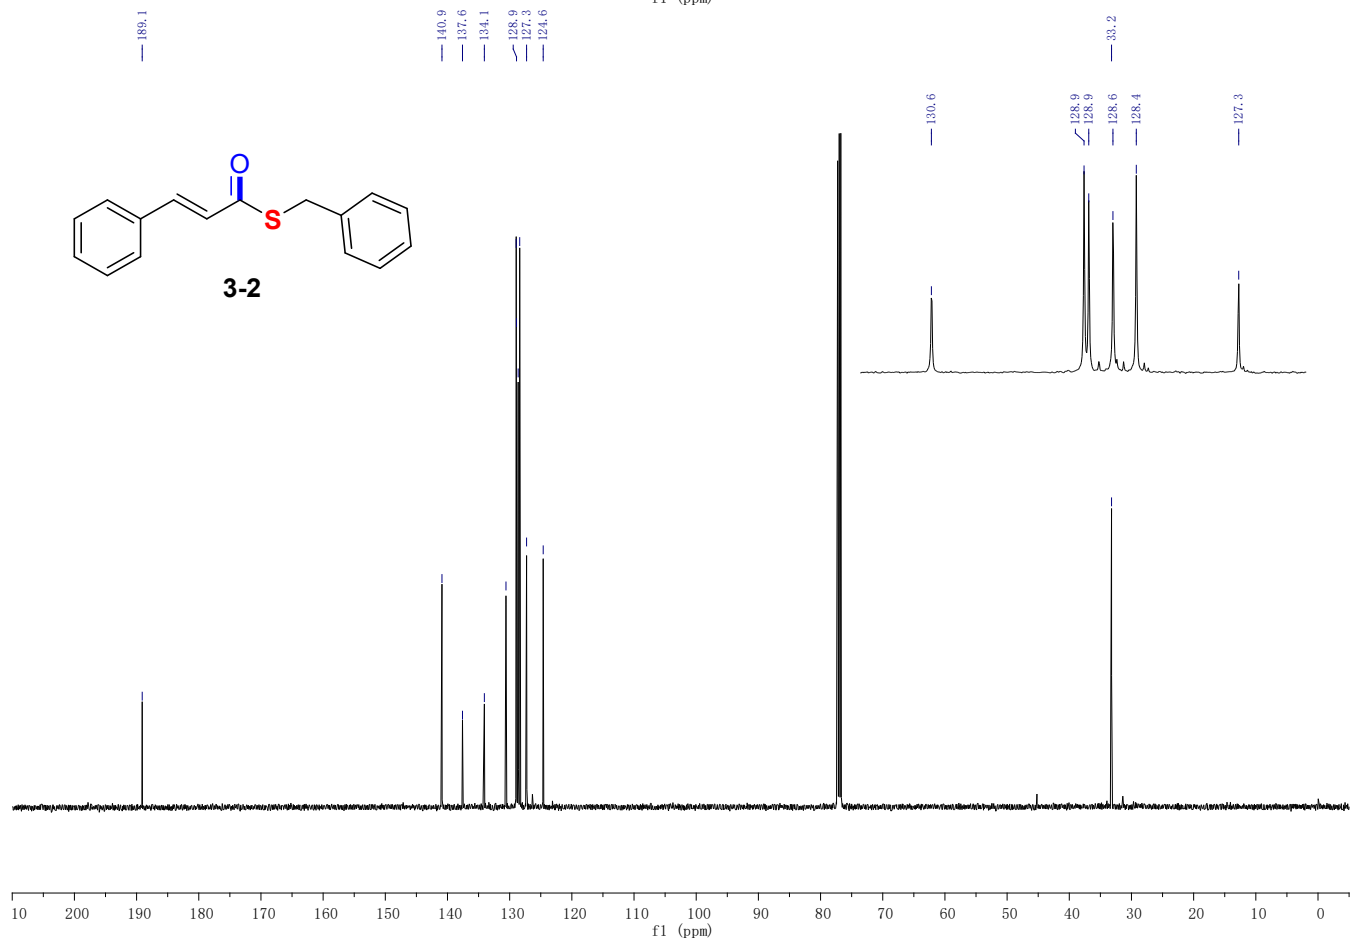

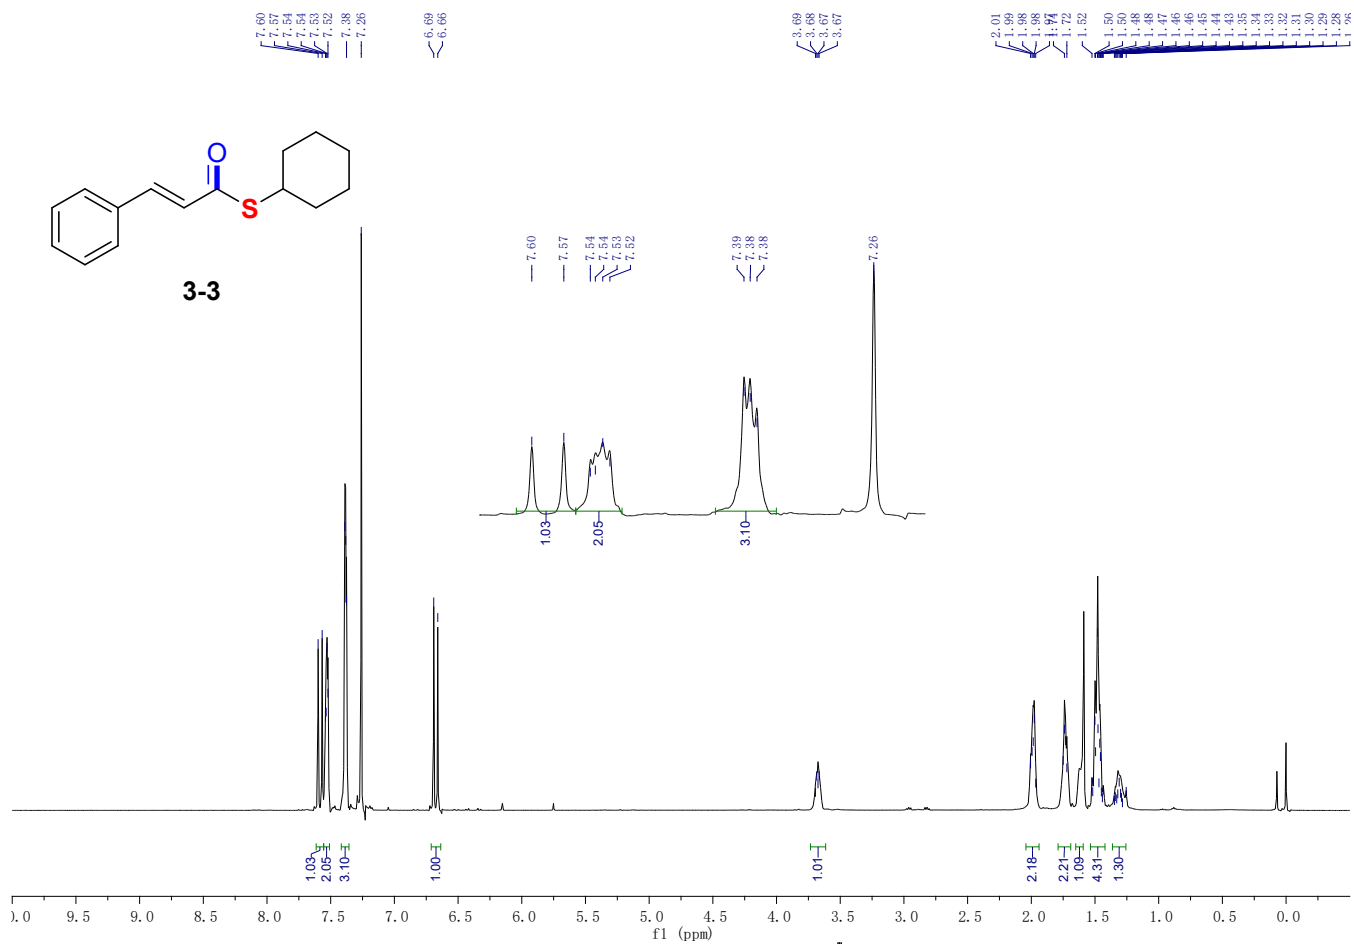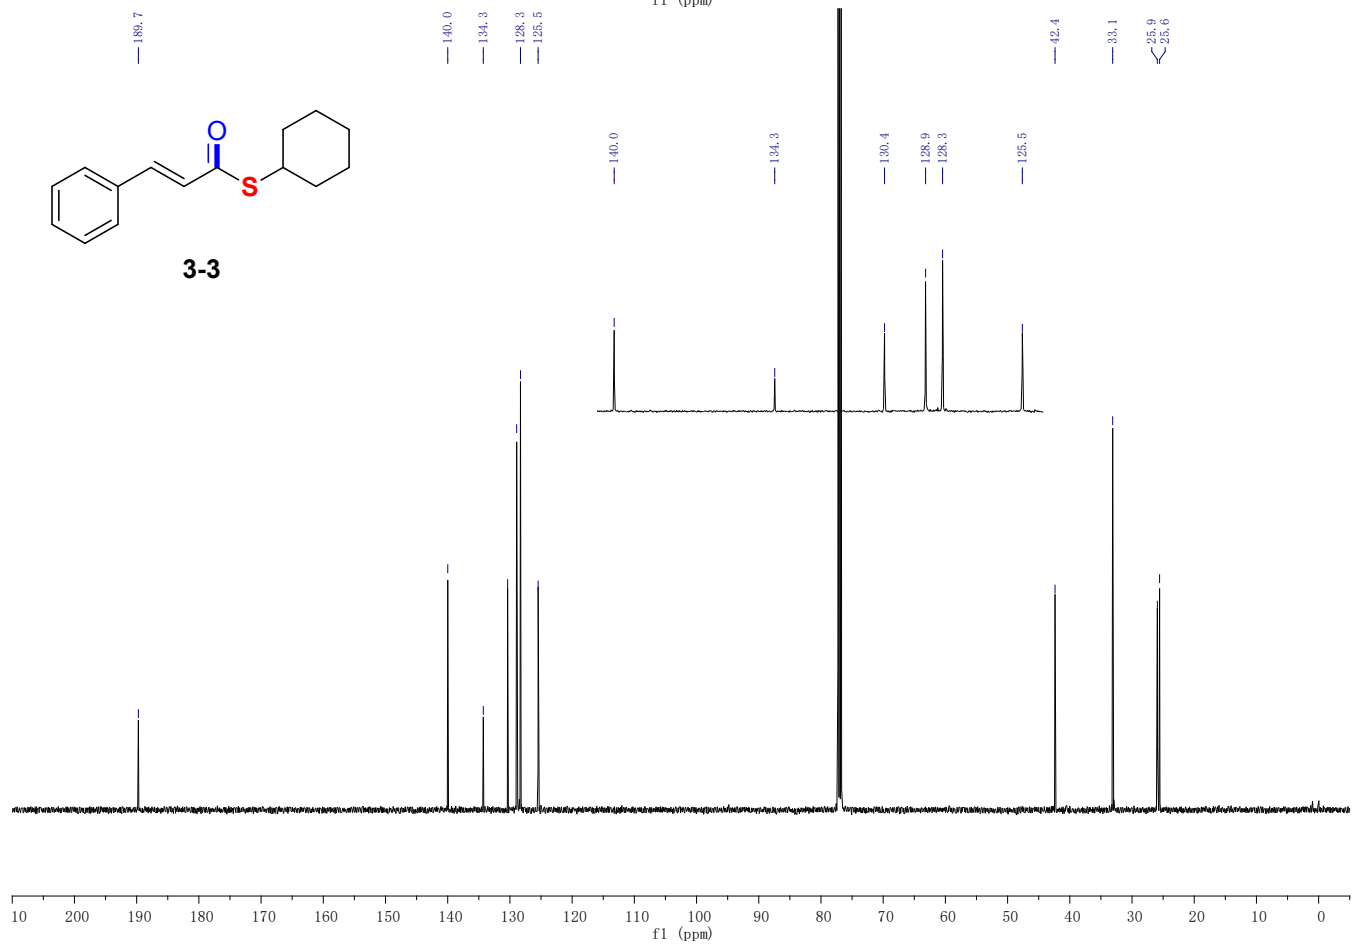

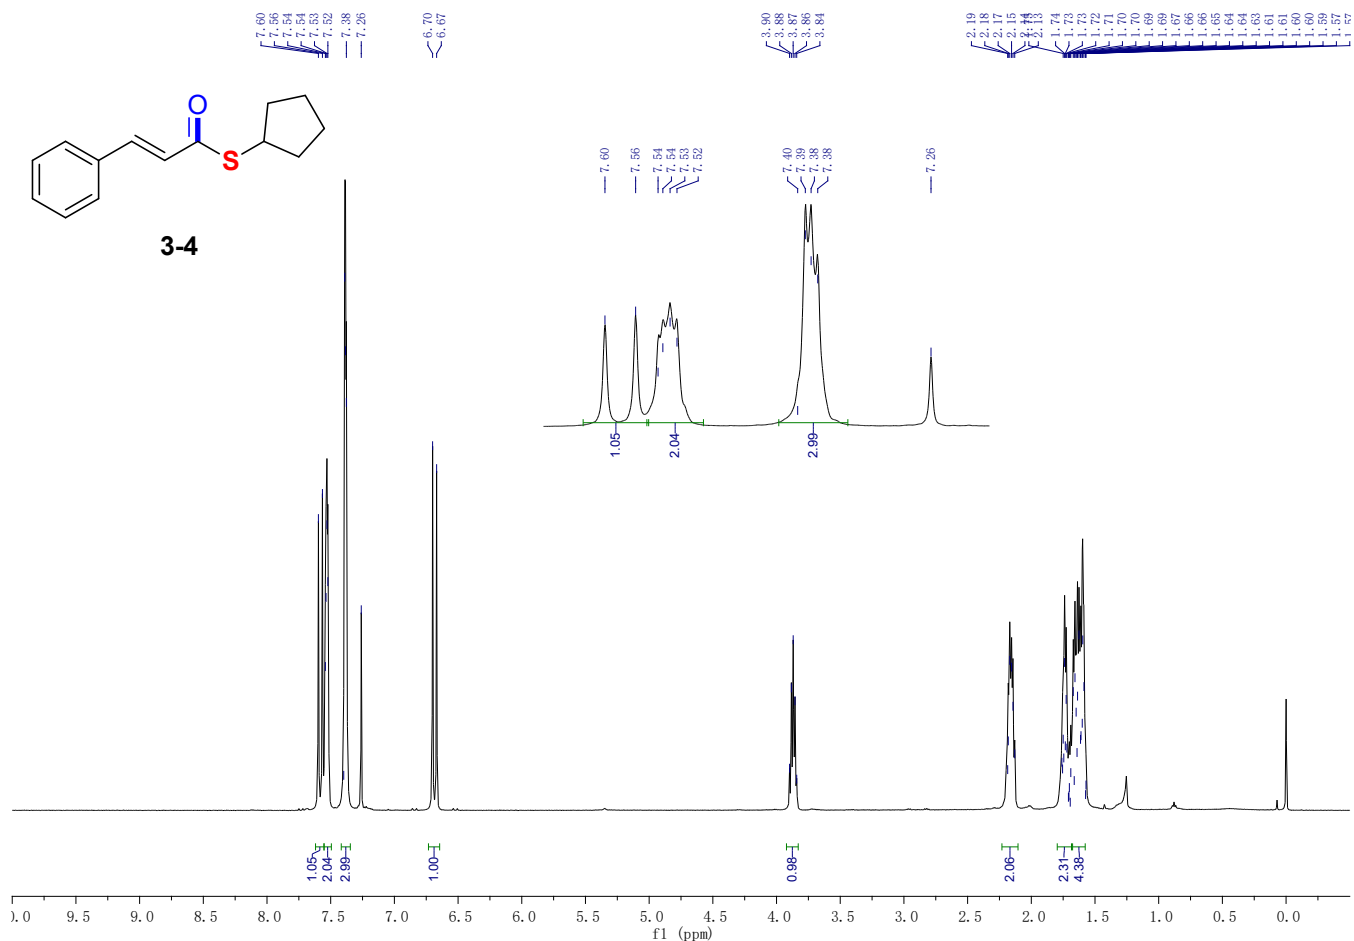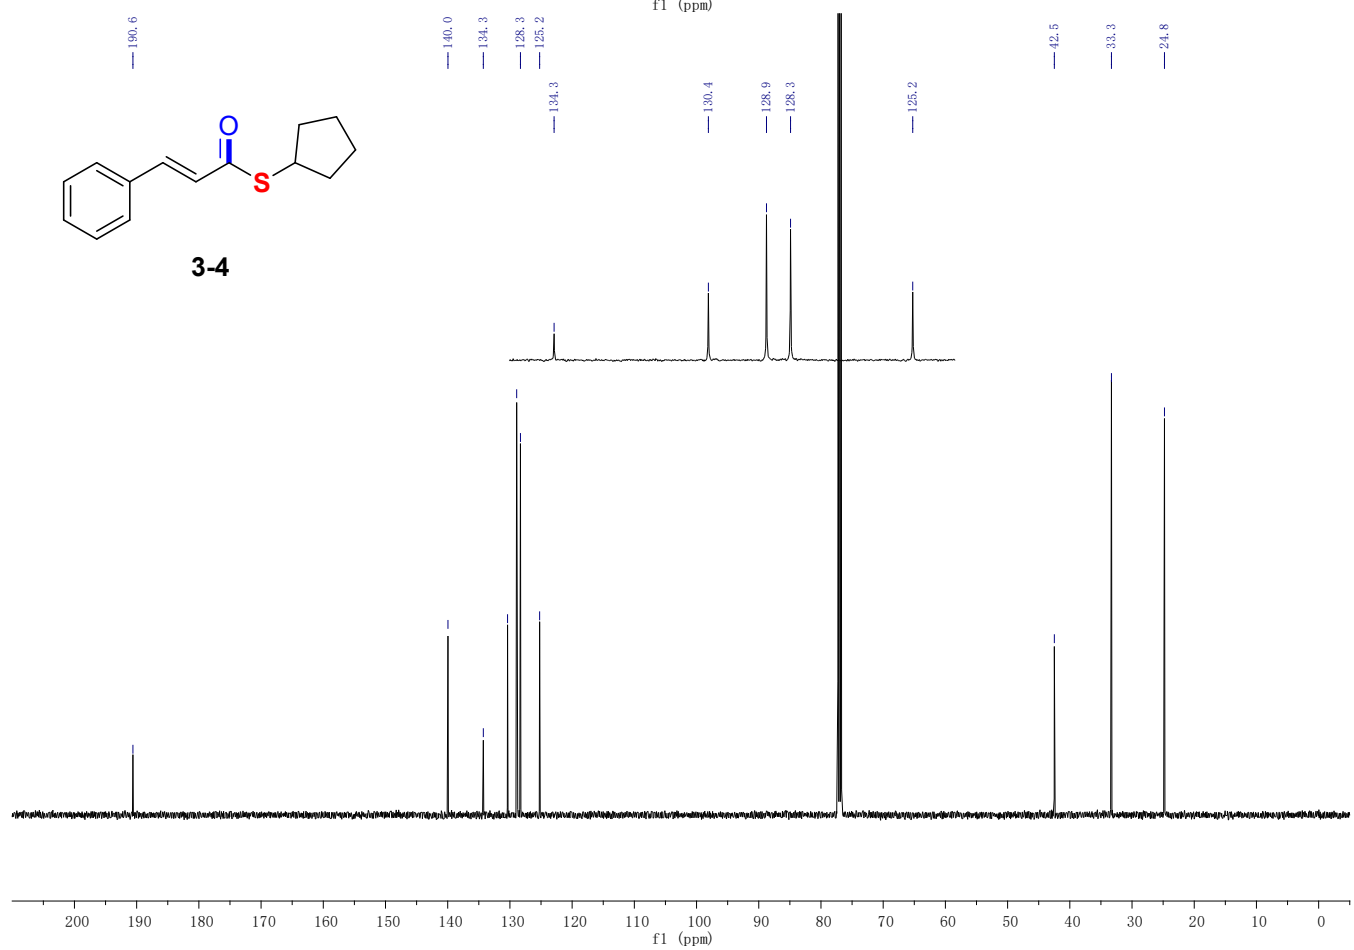

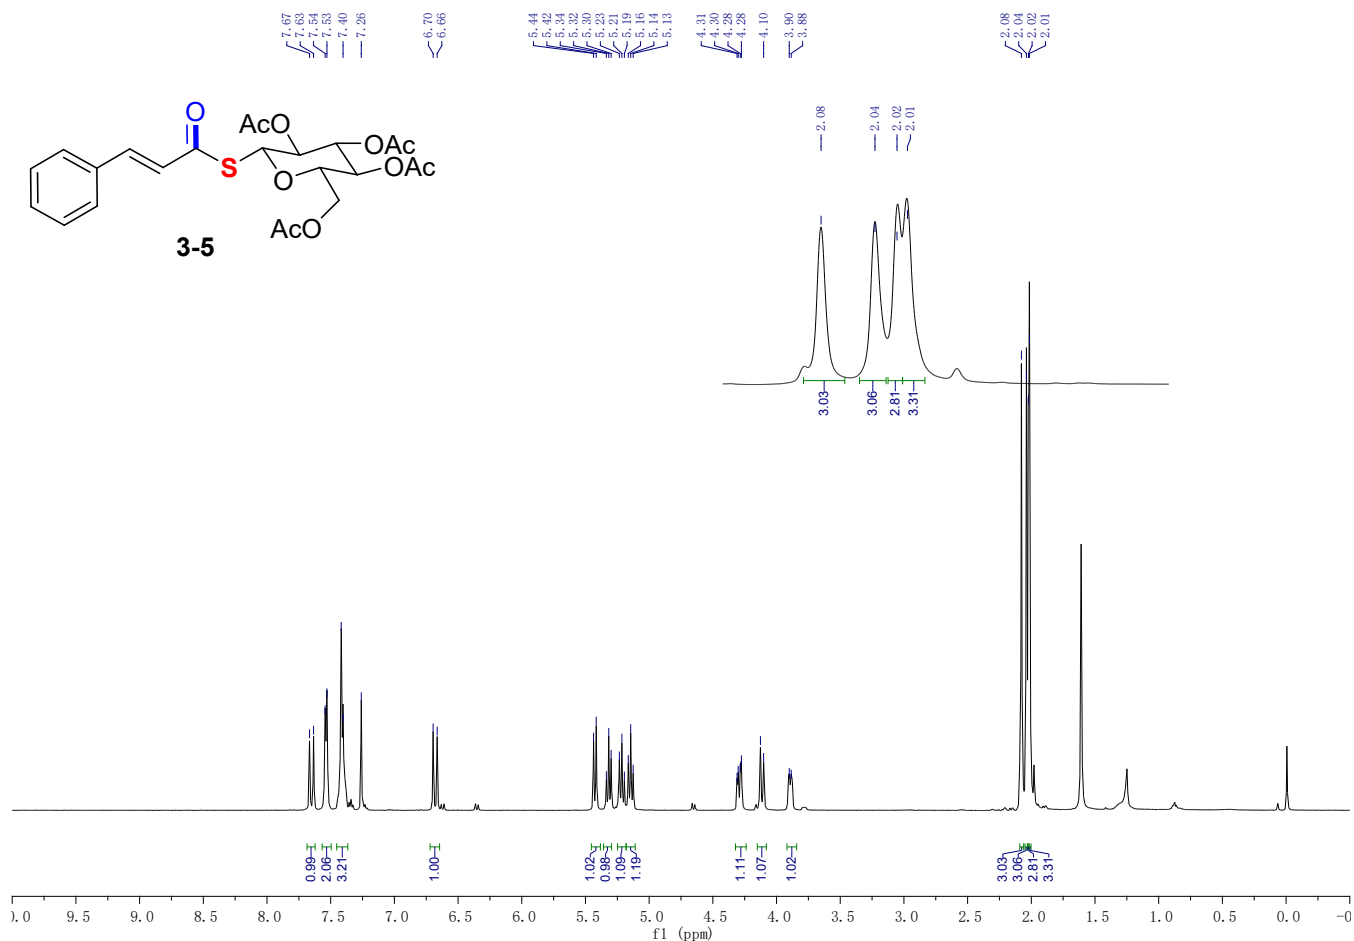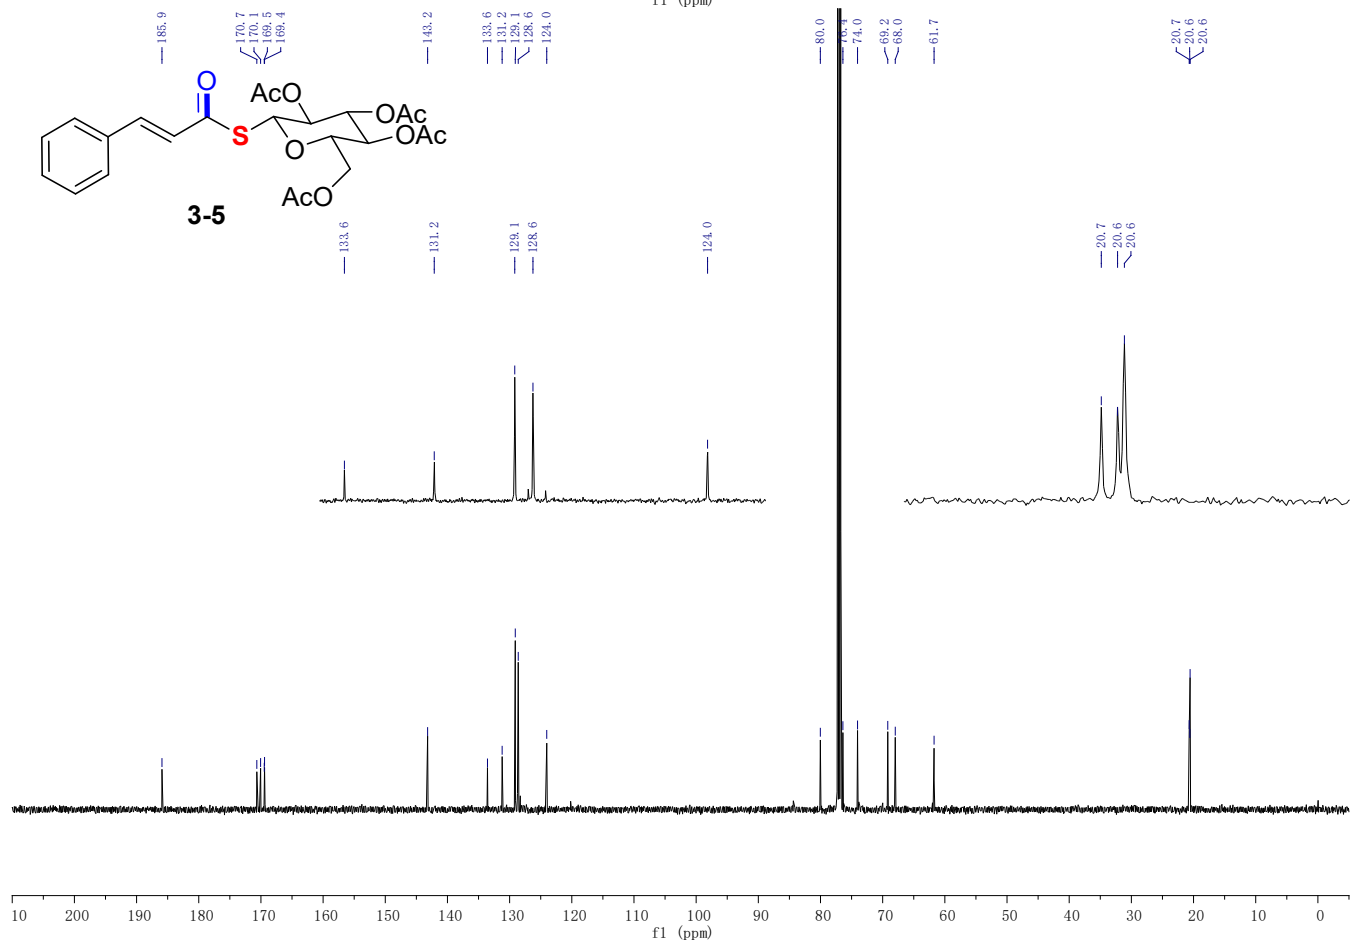



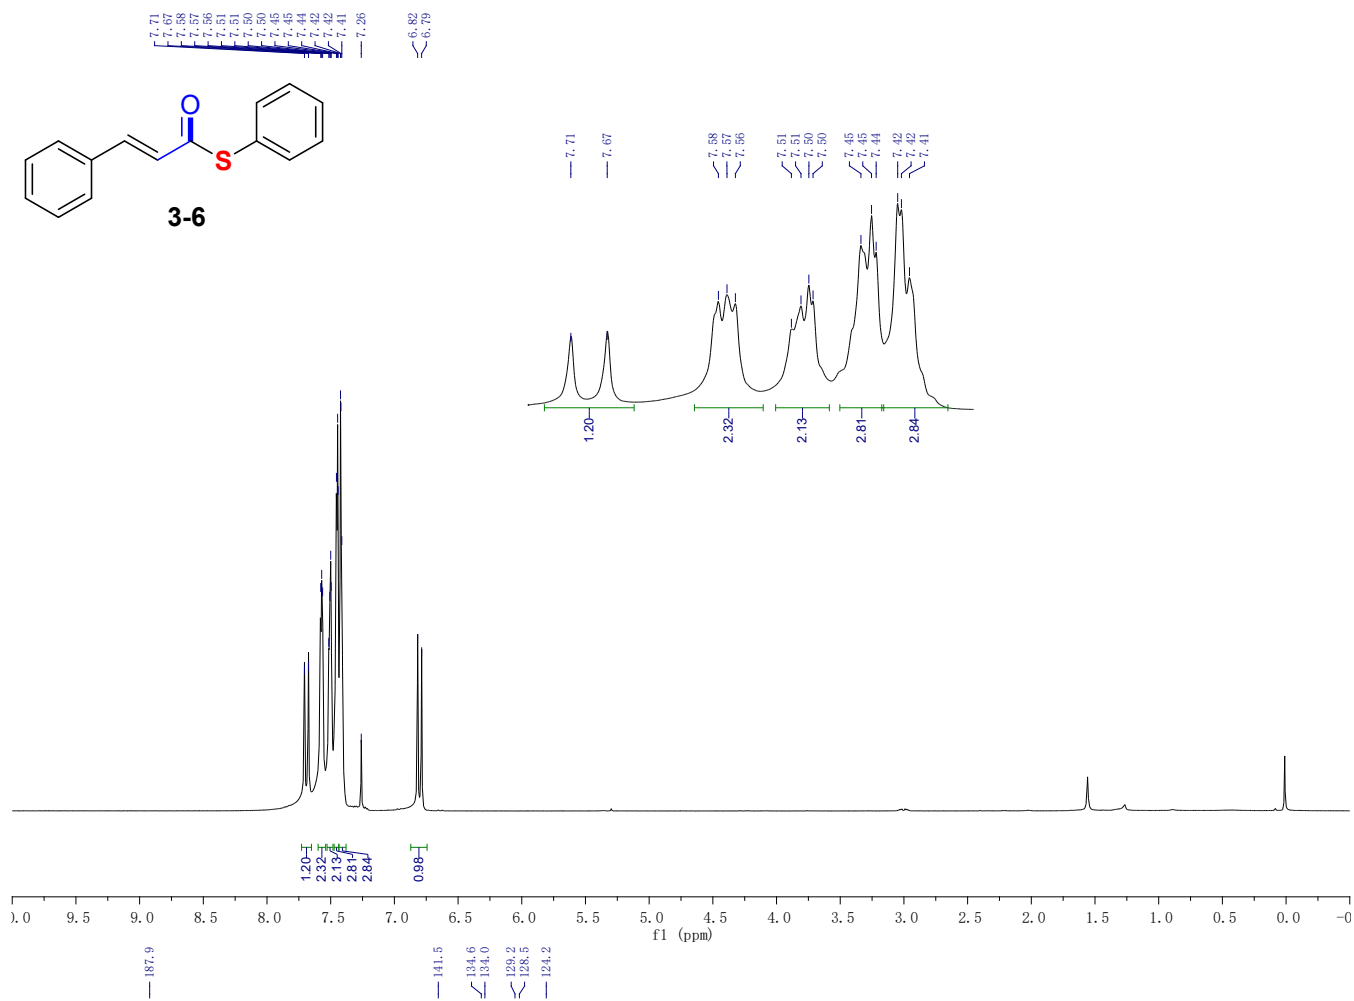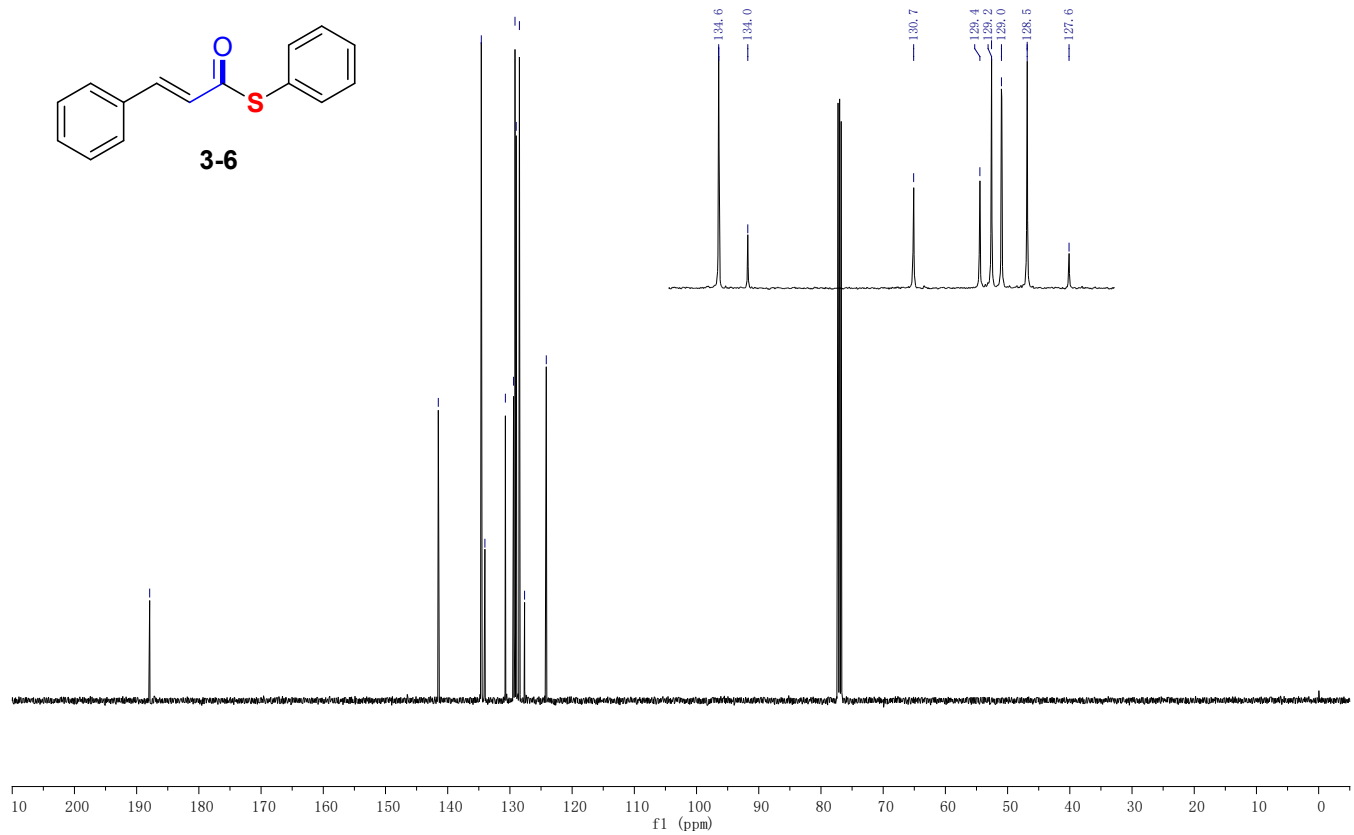

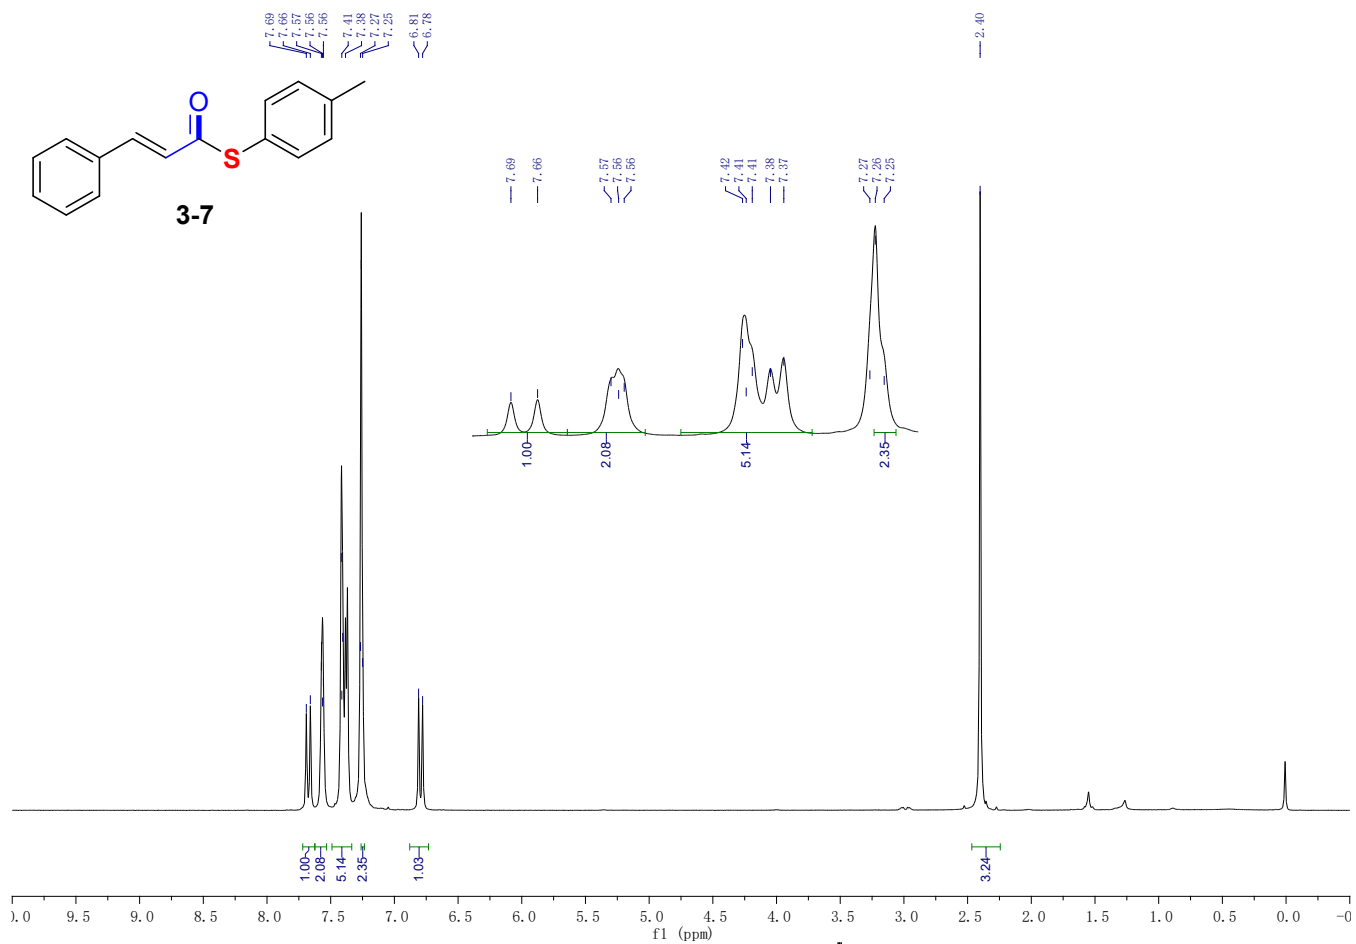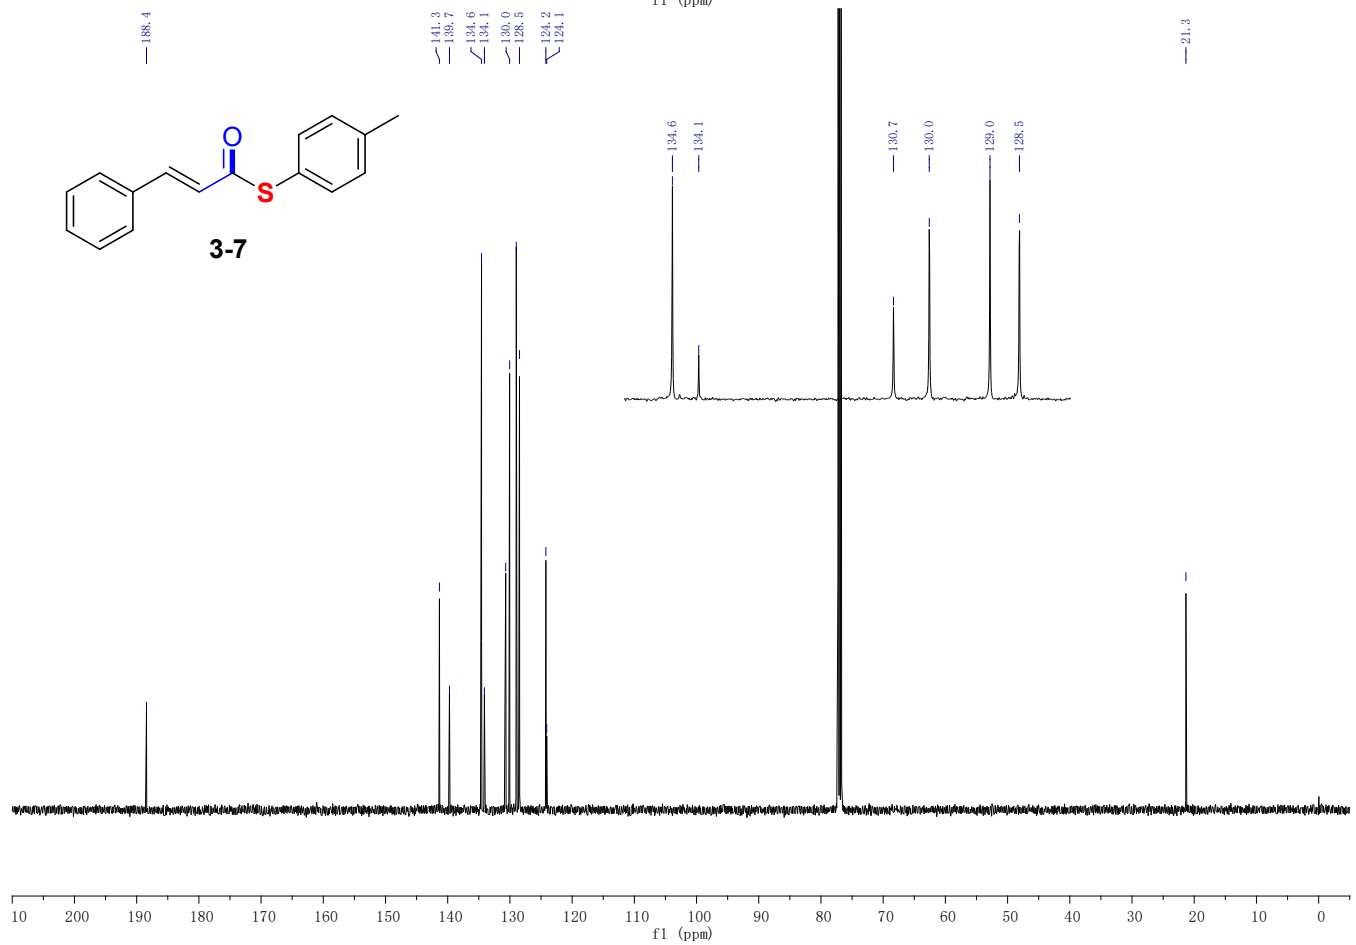

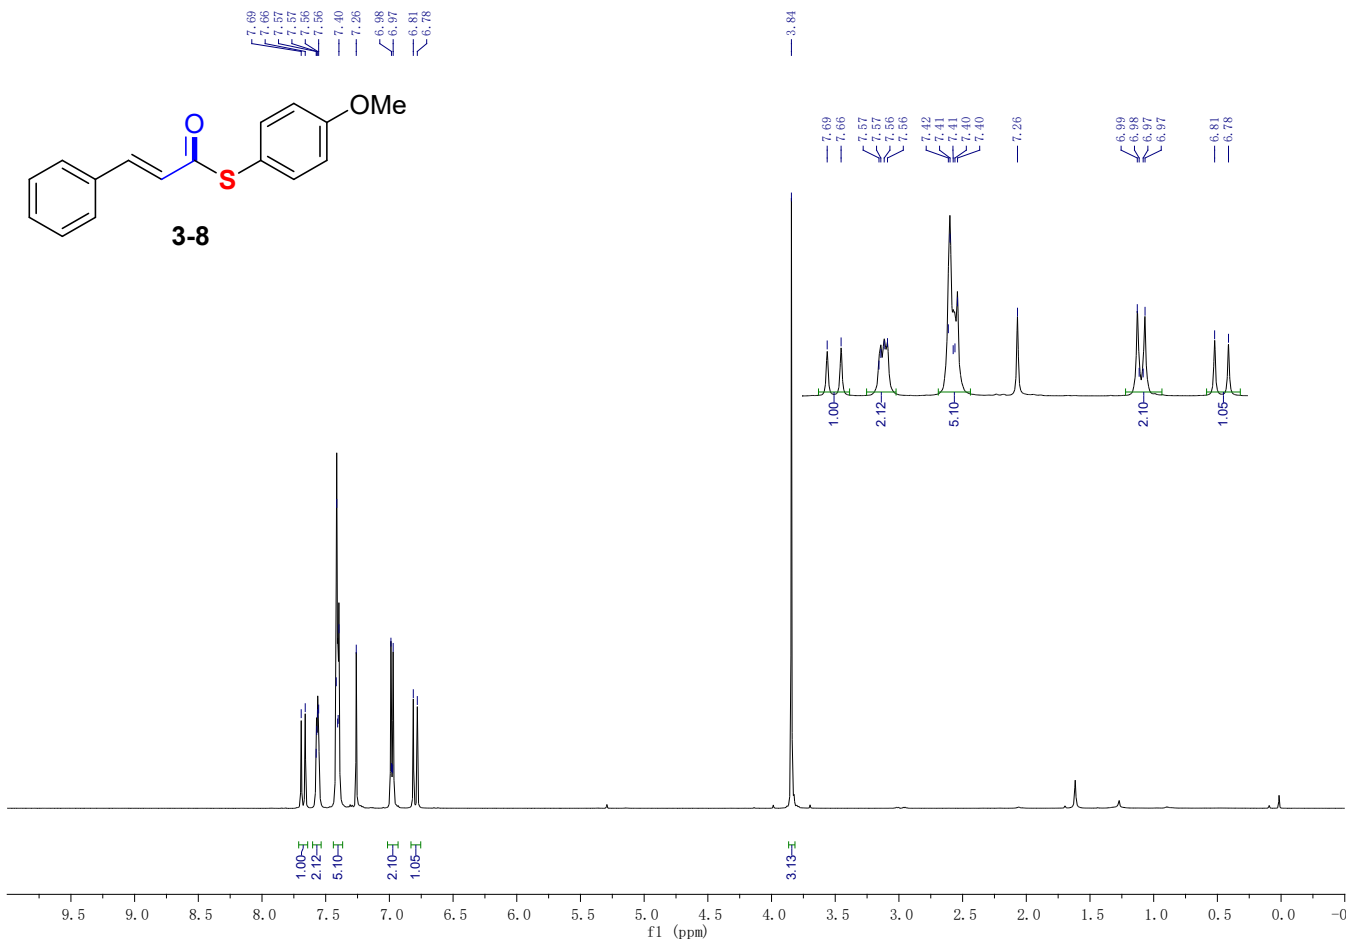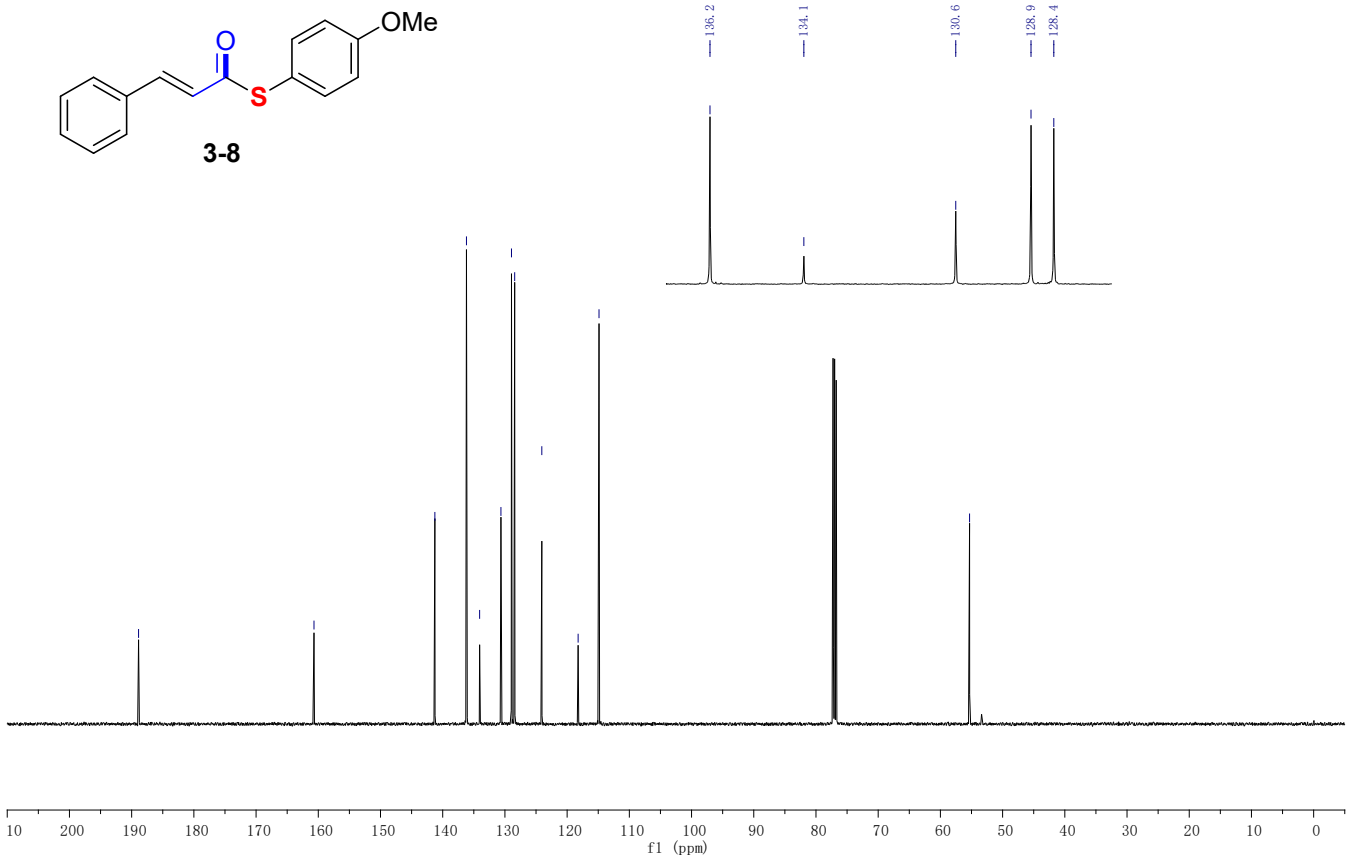

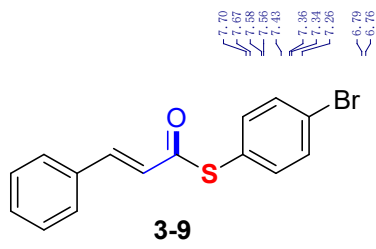

7.70  
 7.67  
 7.58  
 7.56  
 7.43  
 7.36  
 7.34  
 7.26  
 6.79  
 6.76

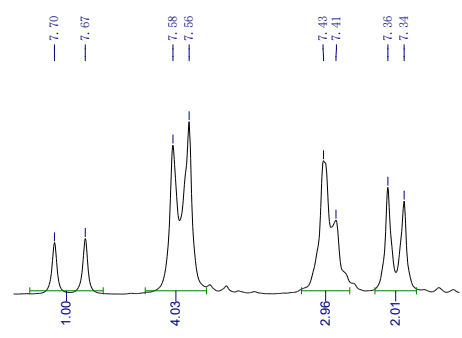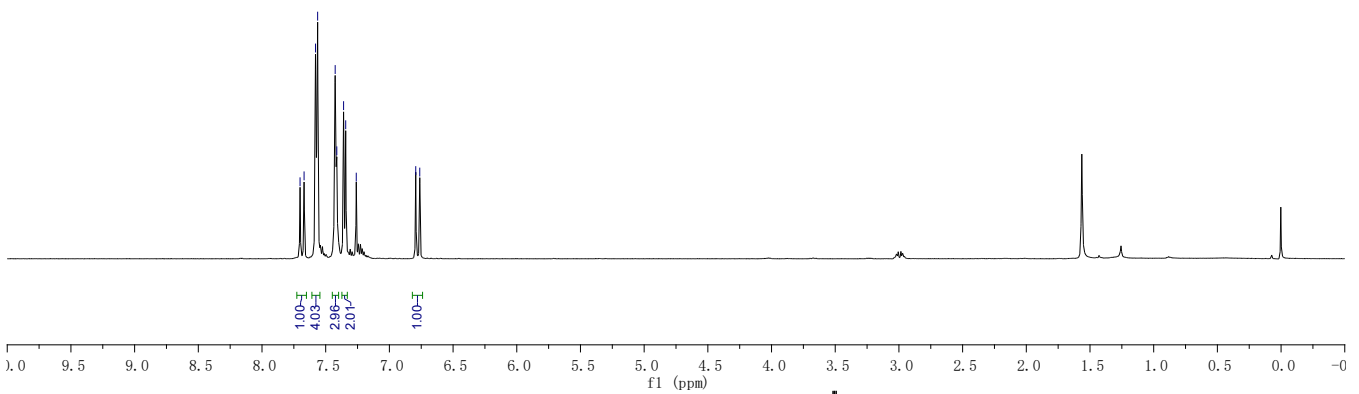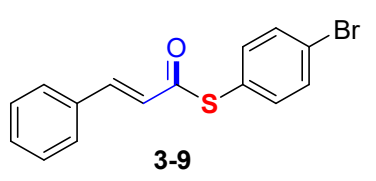

187.2  
 142.0  
 136.9  
 129.0  
 128.5  
 126.8  
 124.1  
 123.9

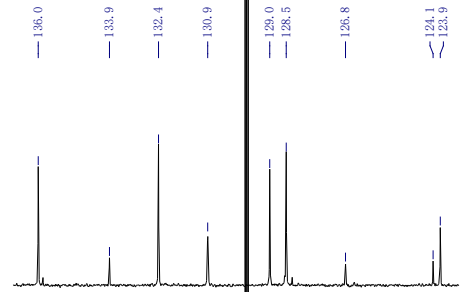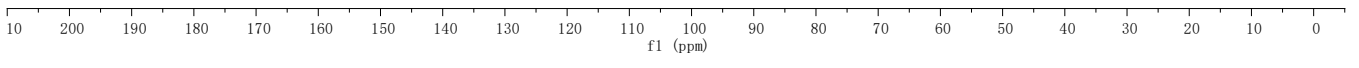

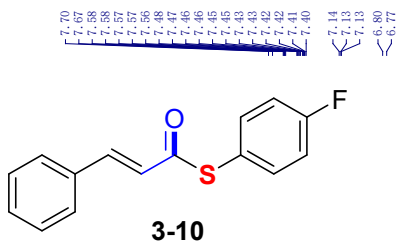

7.70  
 7.67  
 7.58  
 7.56  
 7.57  
 7.56  
 7.48  
 7.47  
 7.46  
 7.45  
 7.45  
 7.43  
 7.43  
 7.42  
 7.41  
 7.40  
 7.14  
 7.13  
 6.80  
 6.77

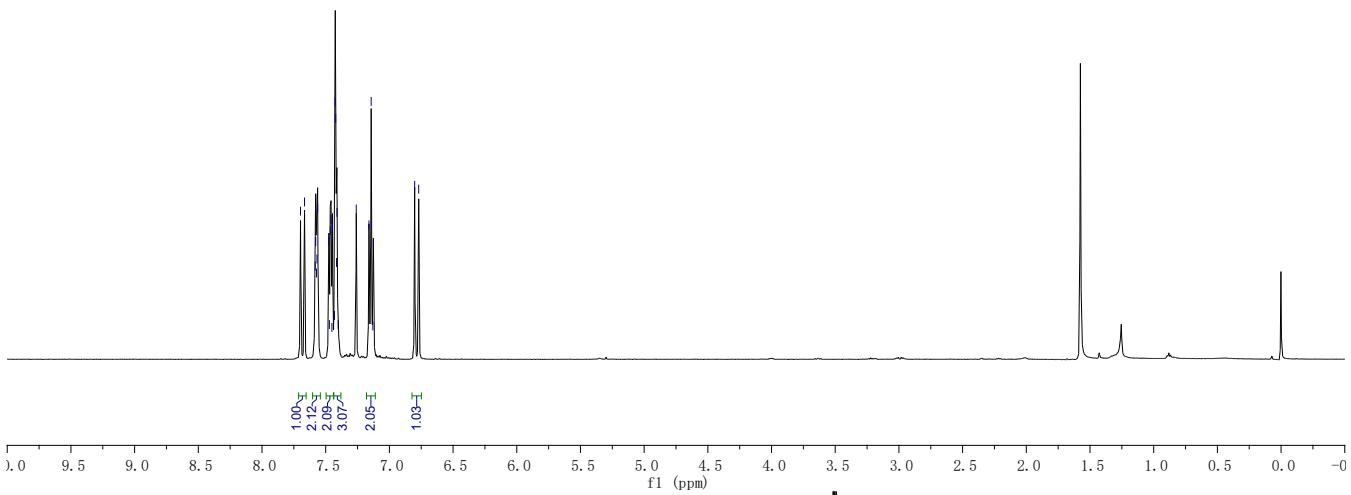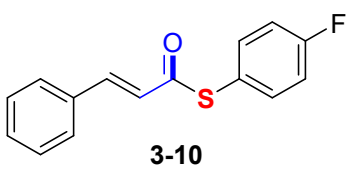

187.9  
 164.5  
 162.6  
 141.8  
 136.7  
 136.7  
 133.9  
 133.9  
 129.0  
 128.5  
 123.9  
 122.9  
 122.9  
 116.6  
 116.4

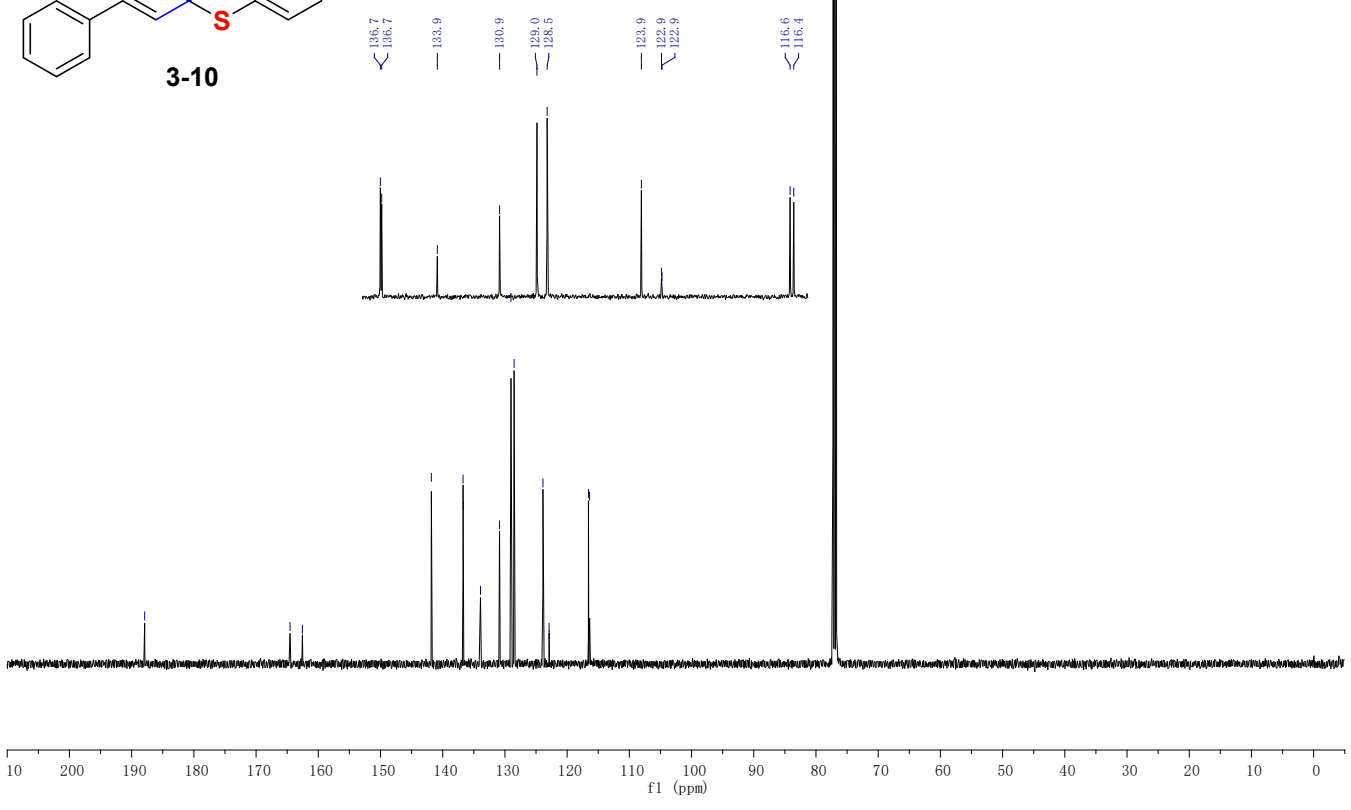

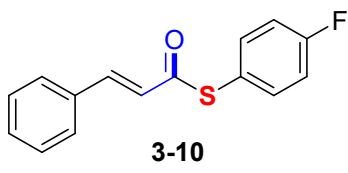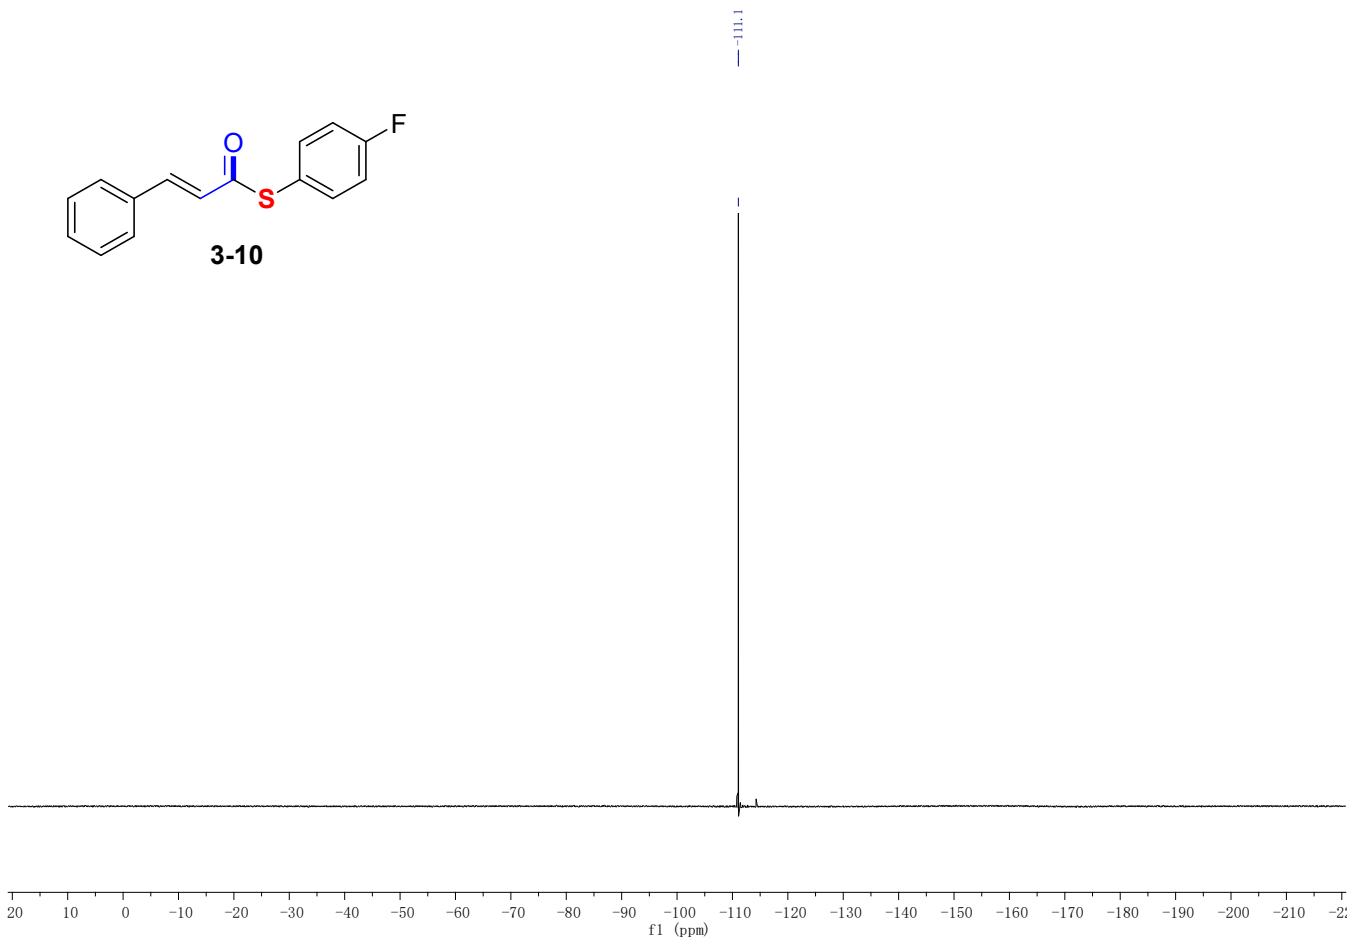

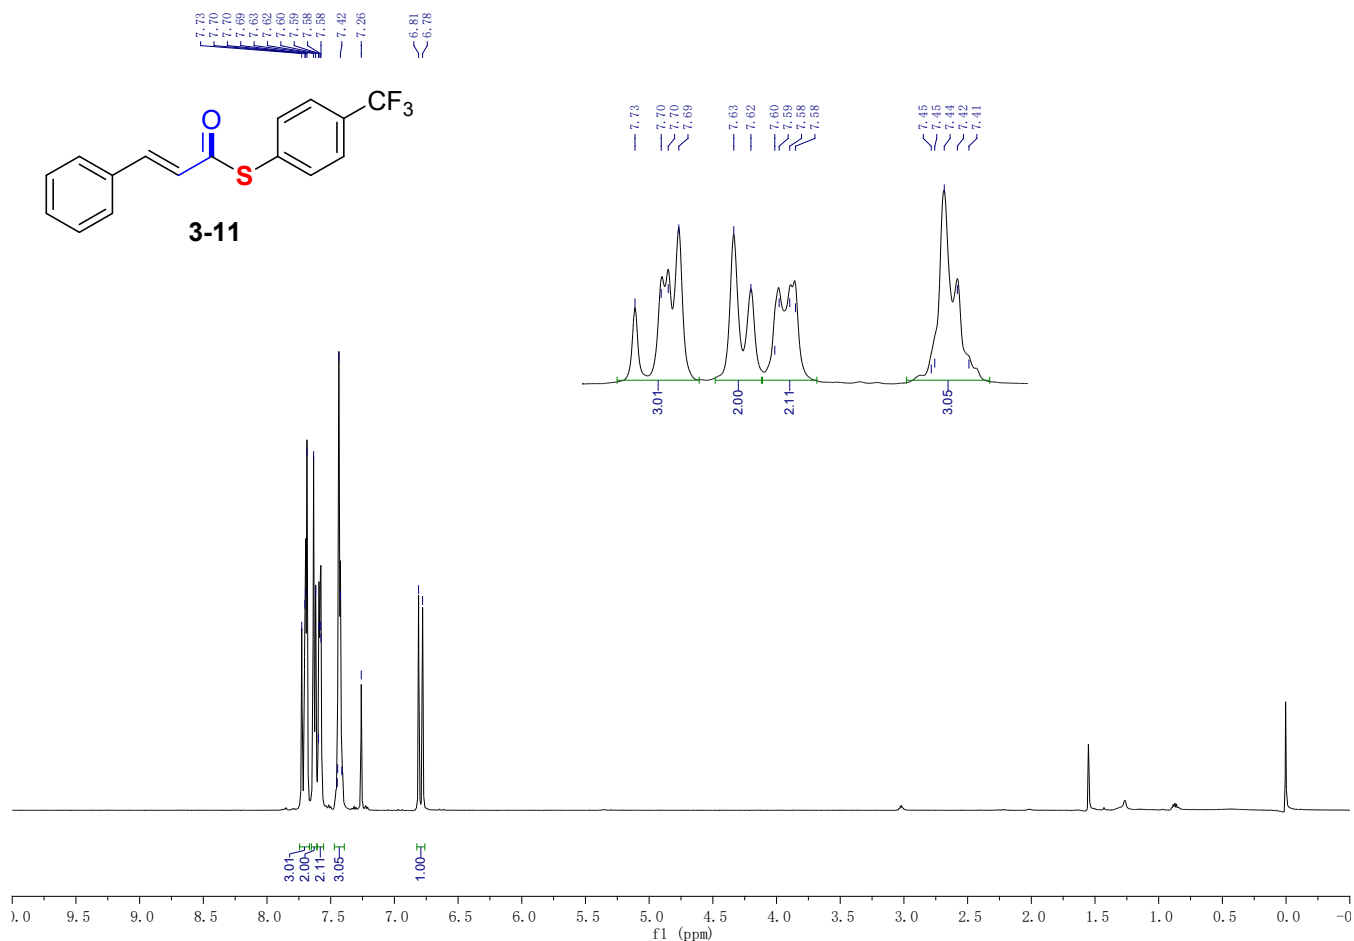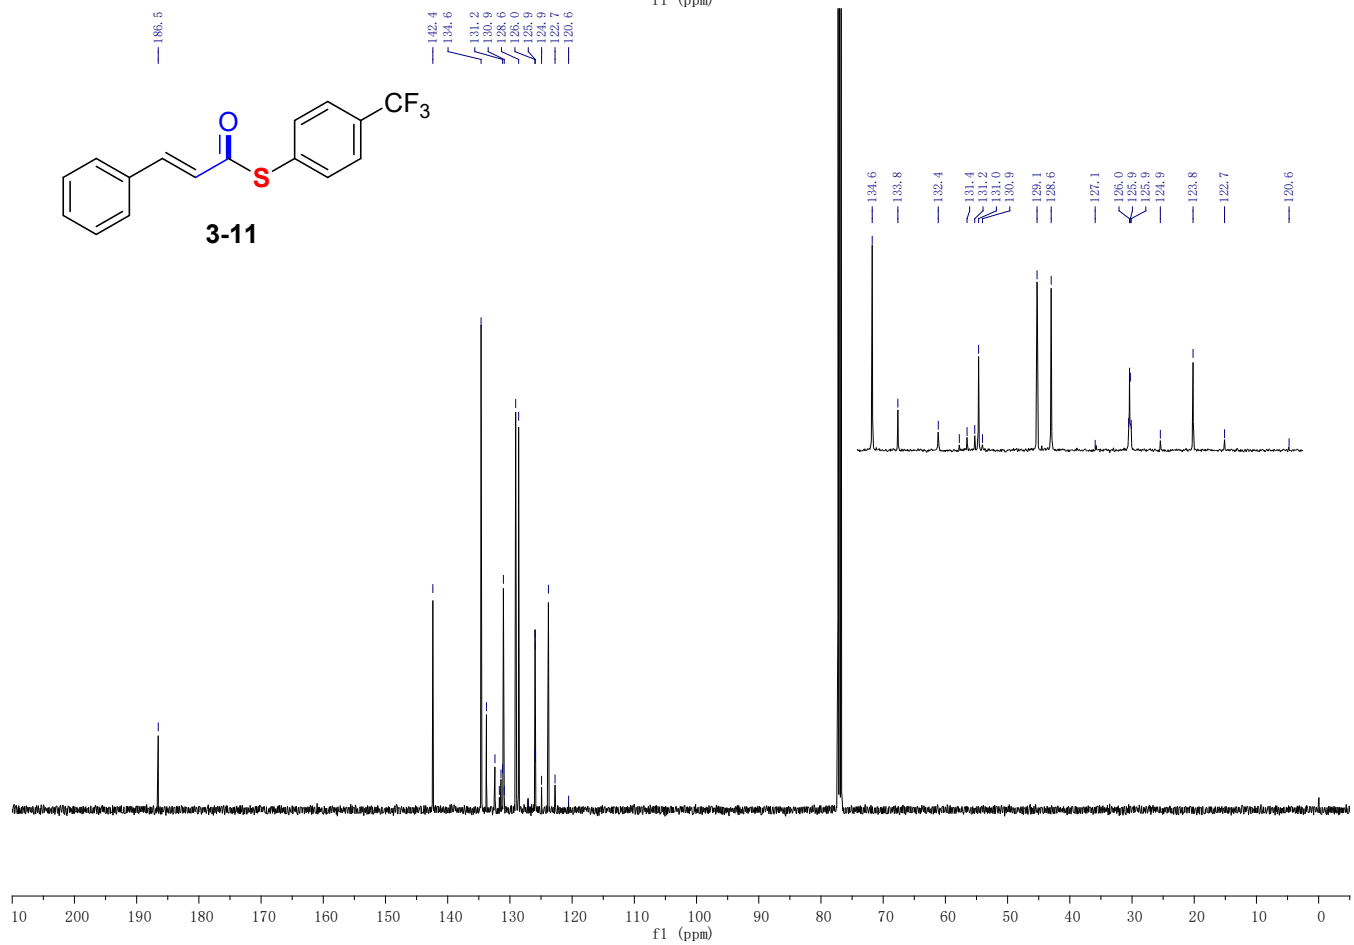

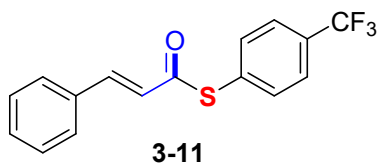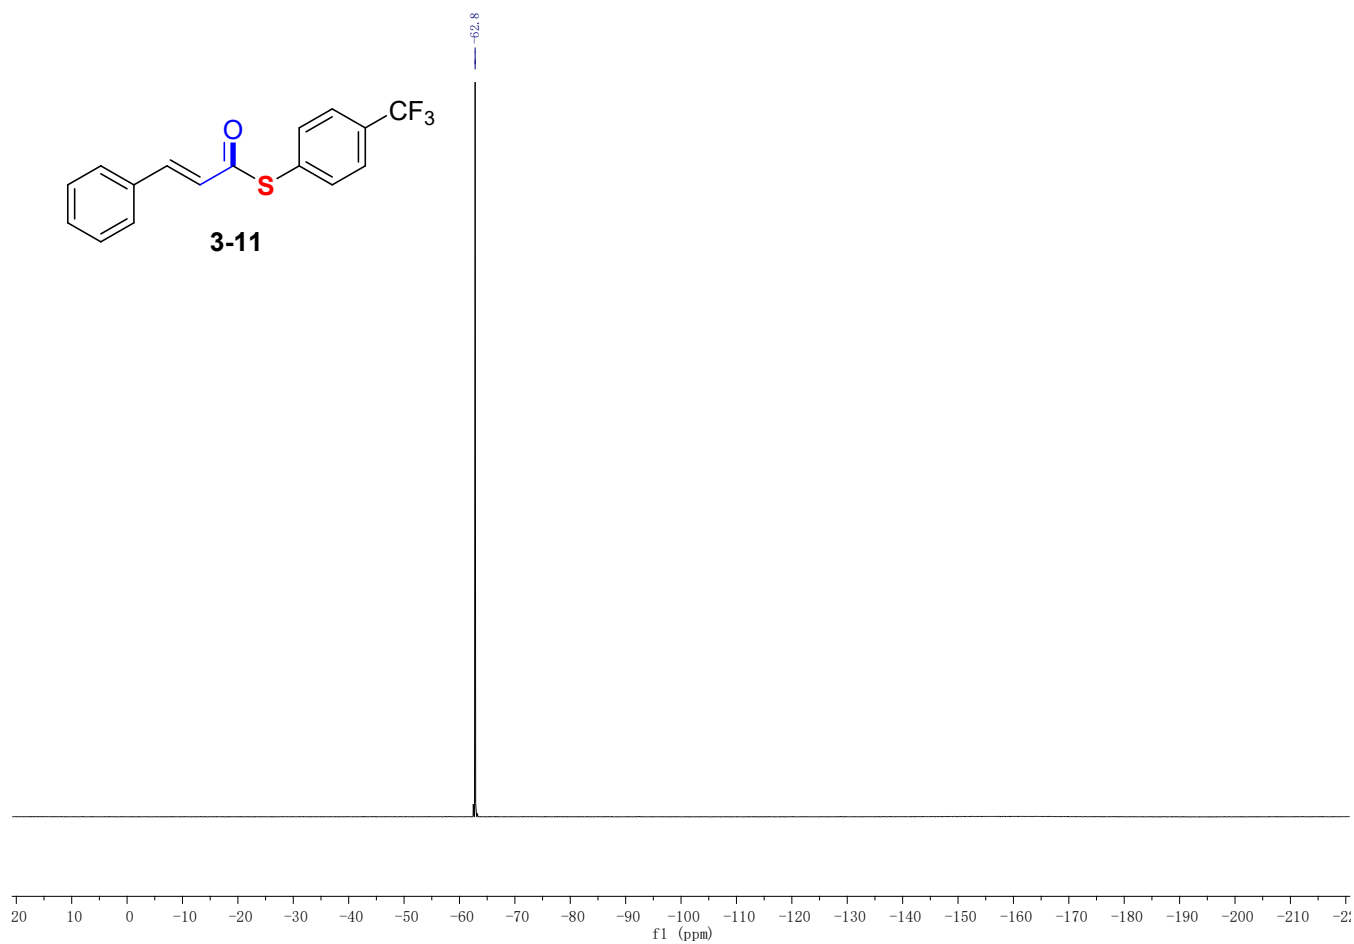



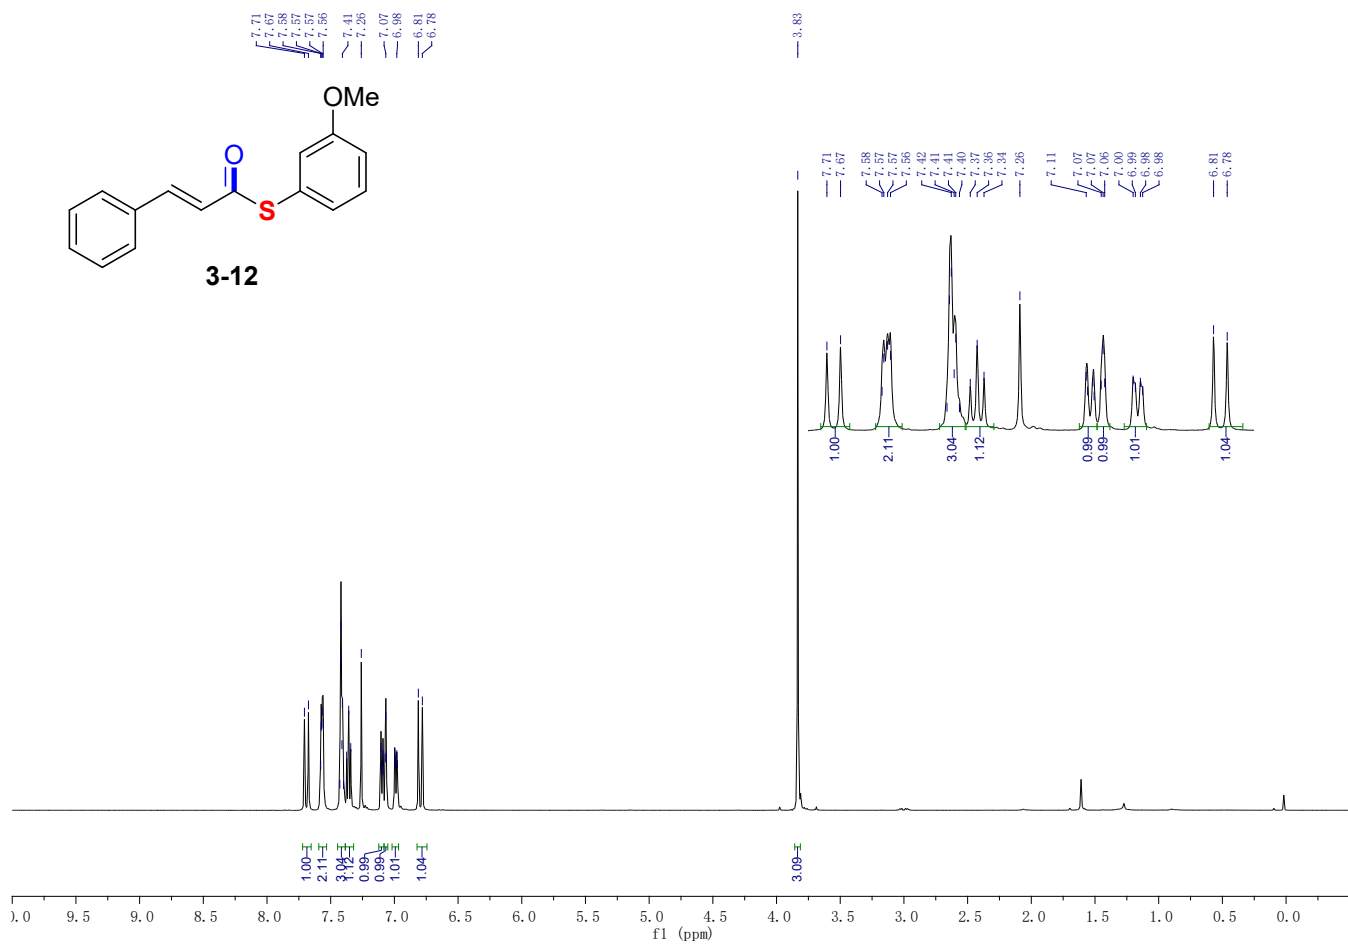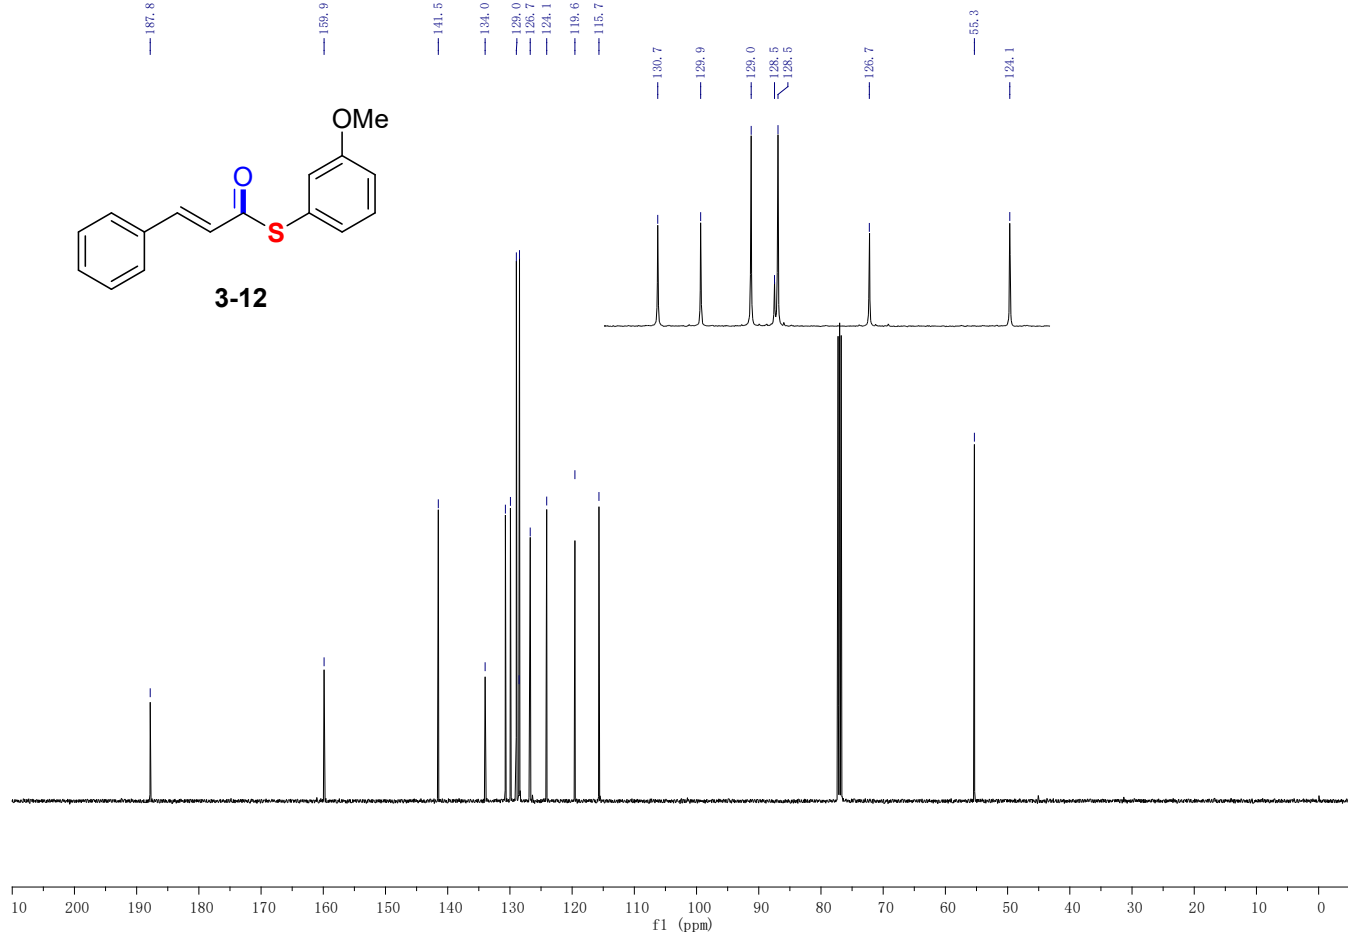

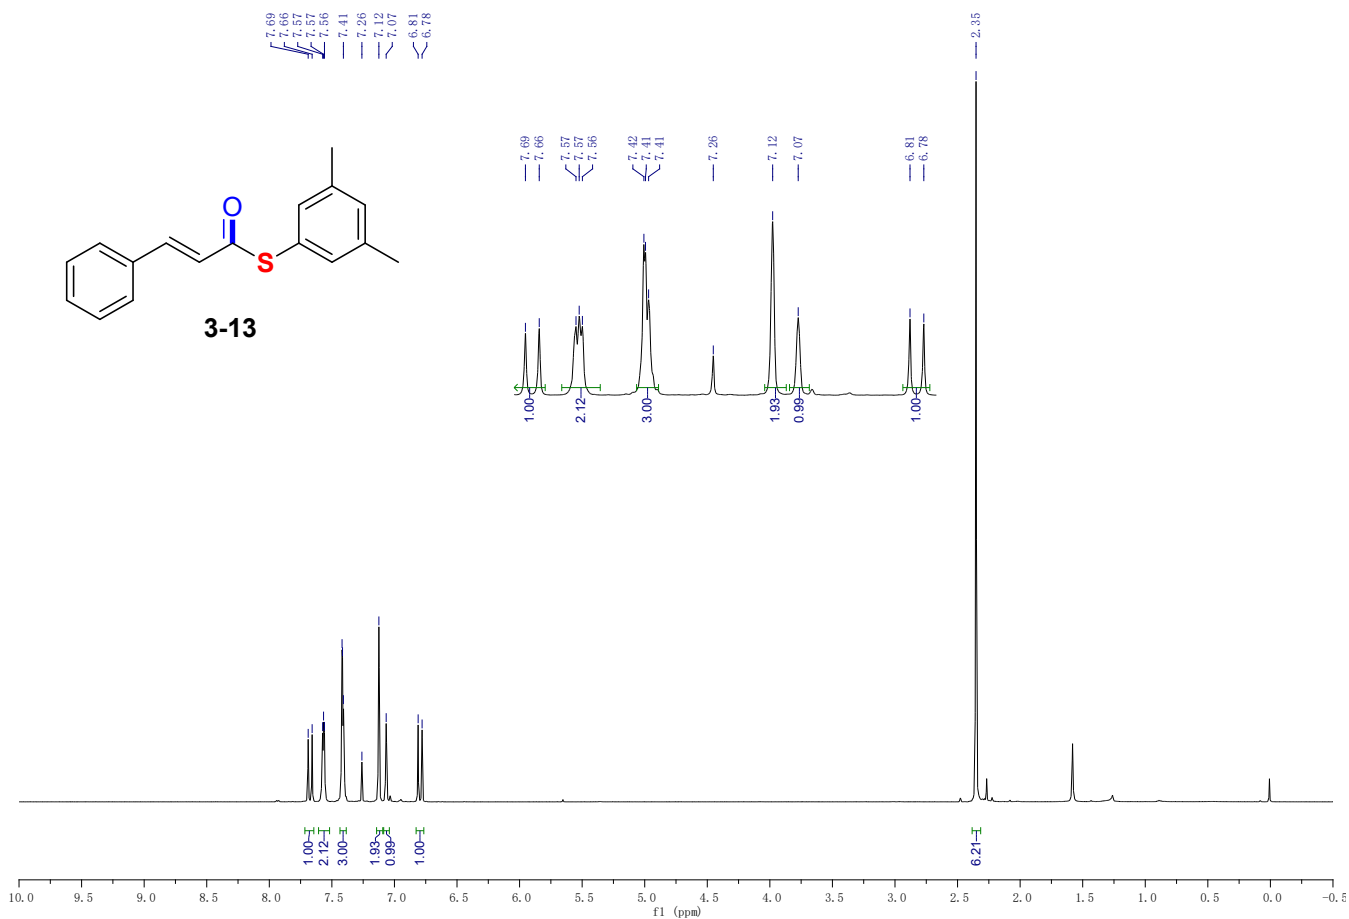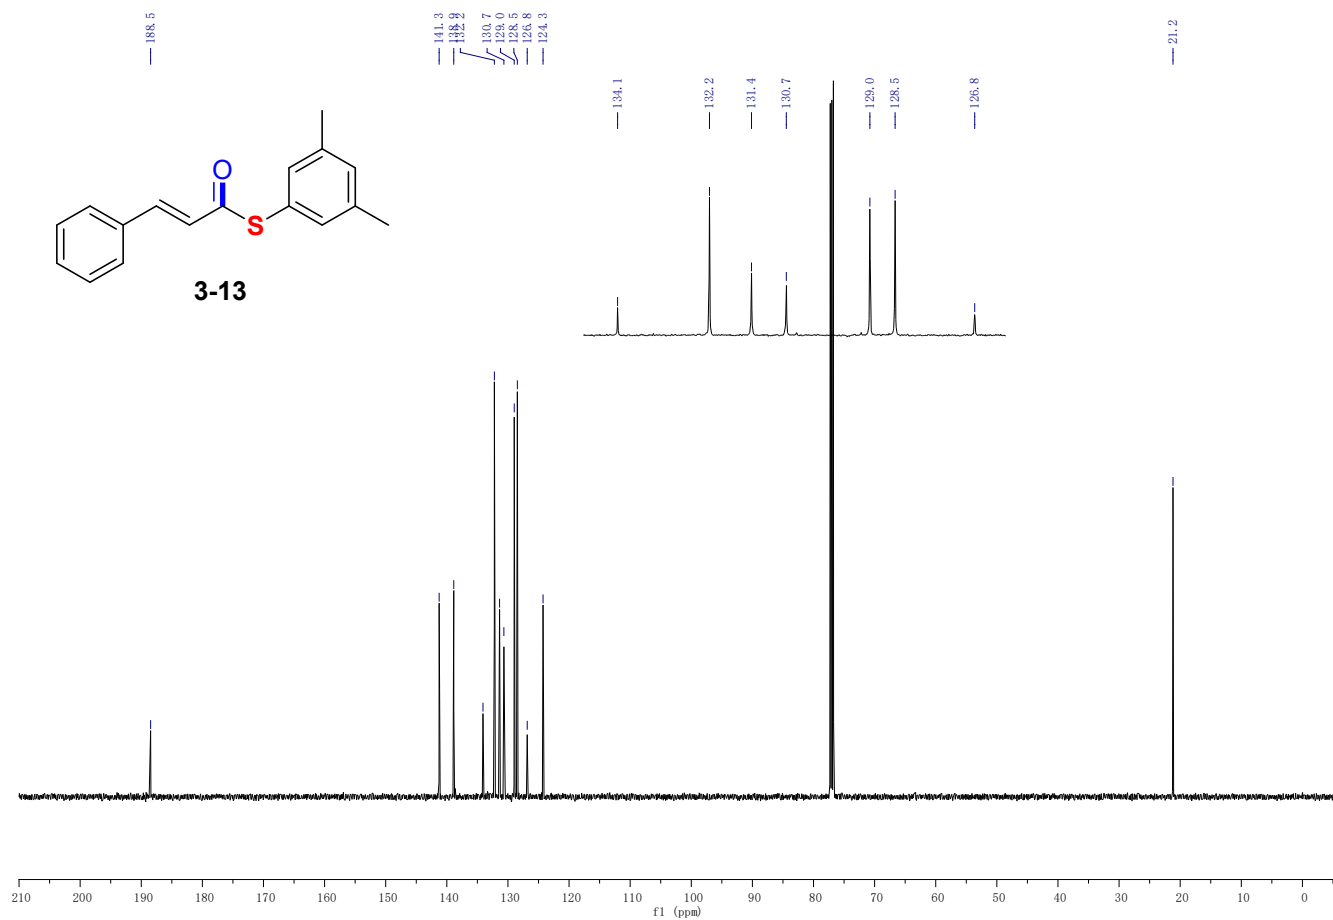

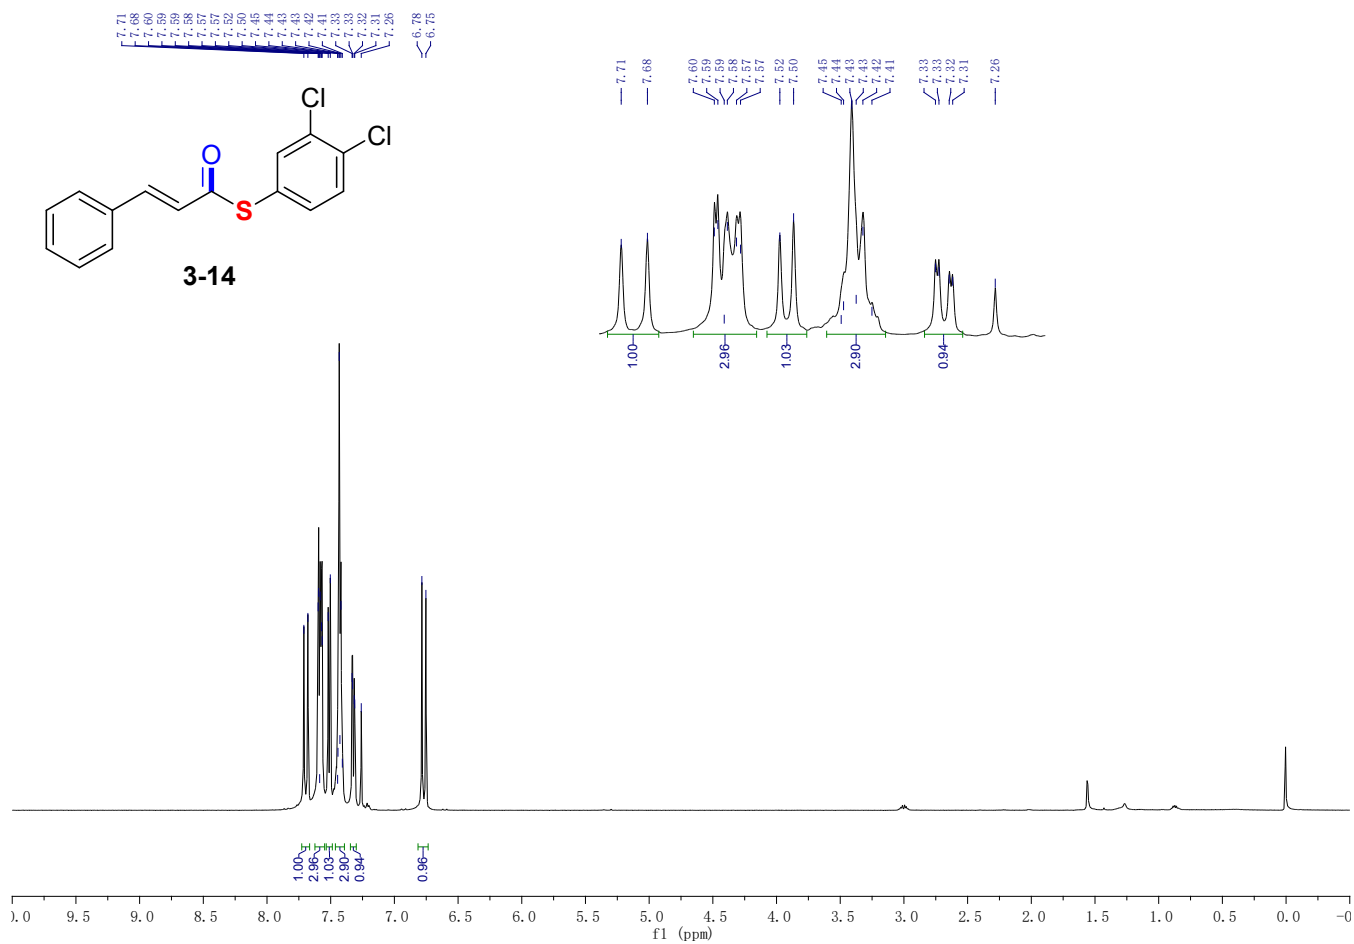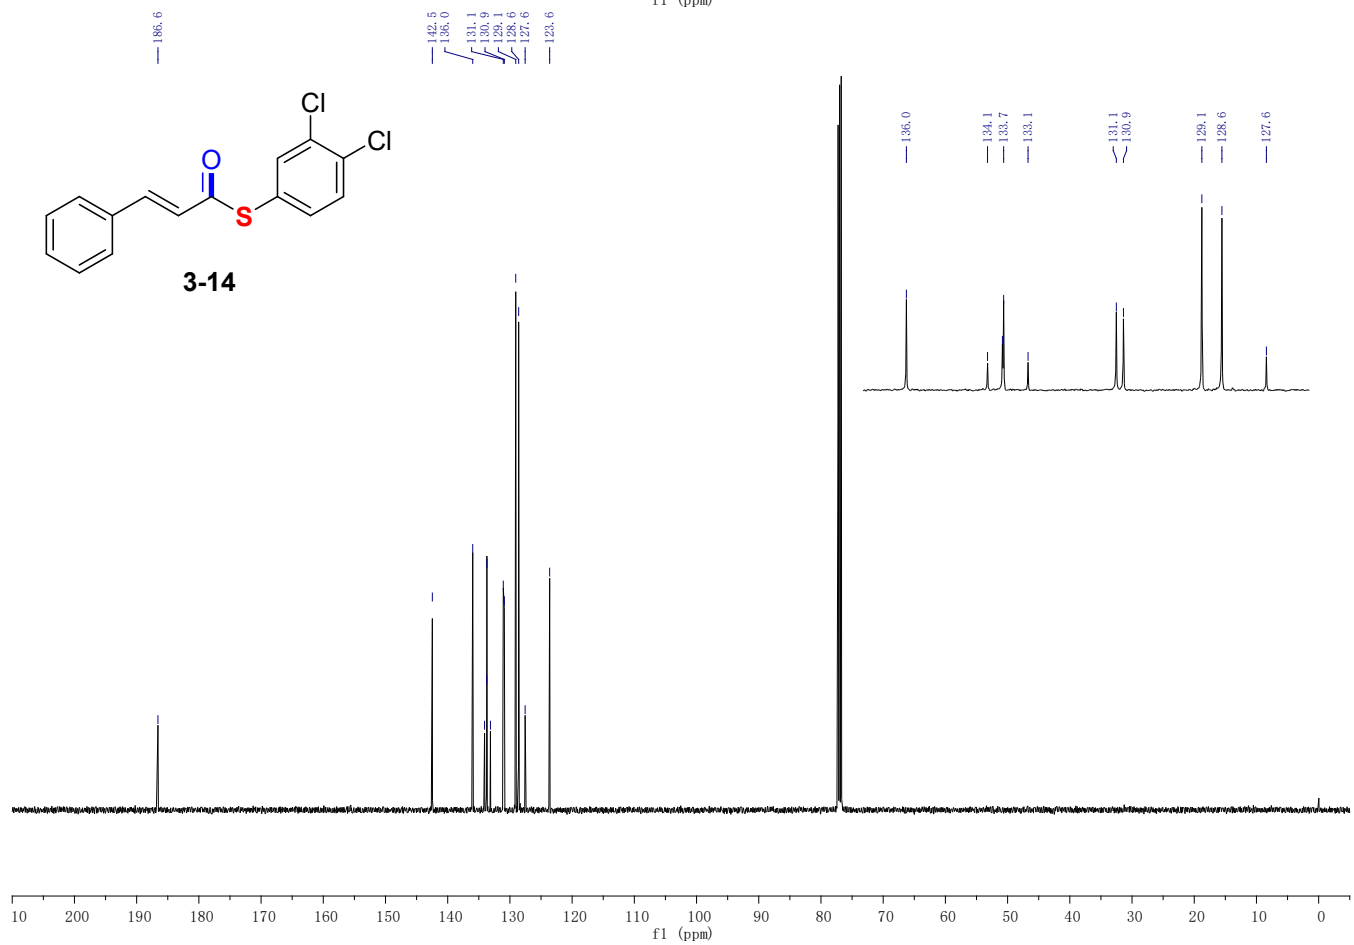

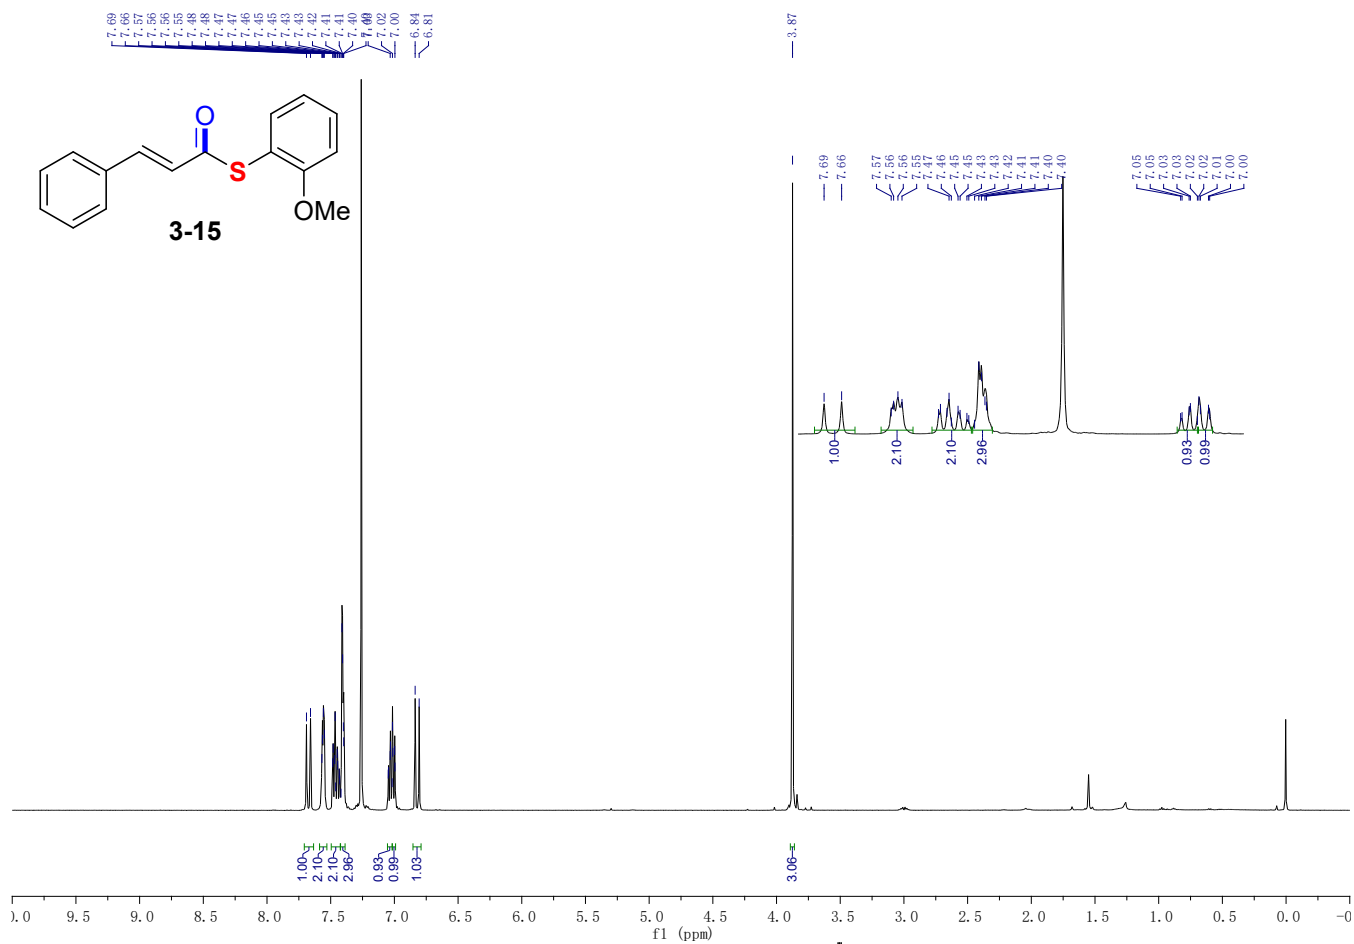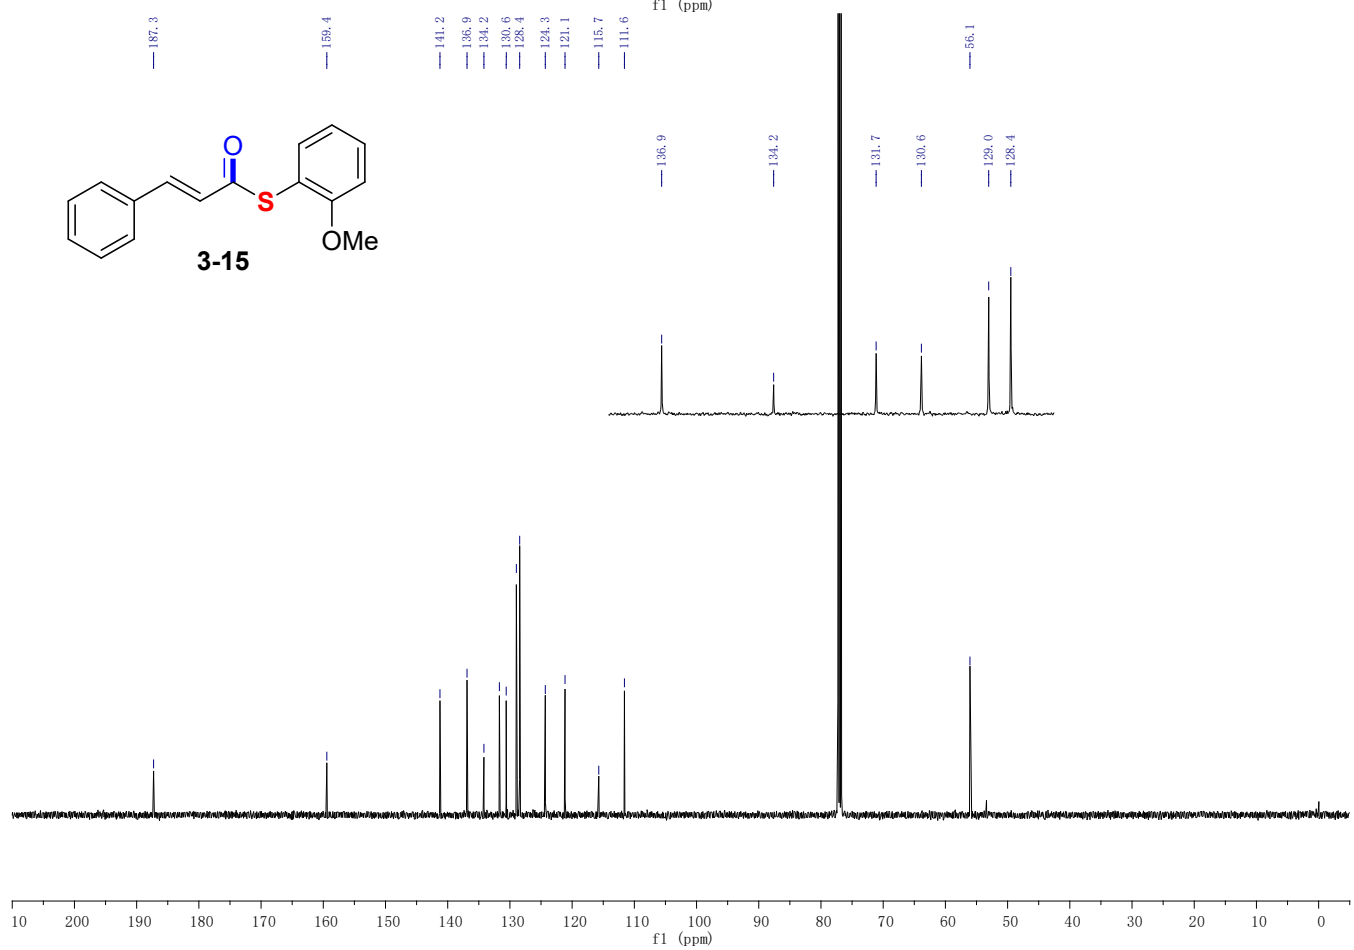

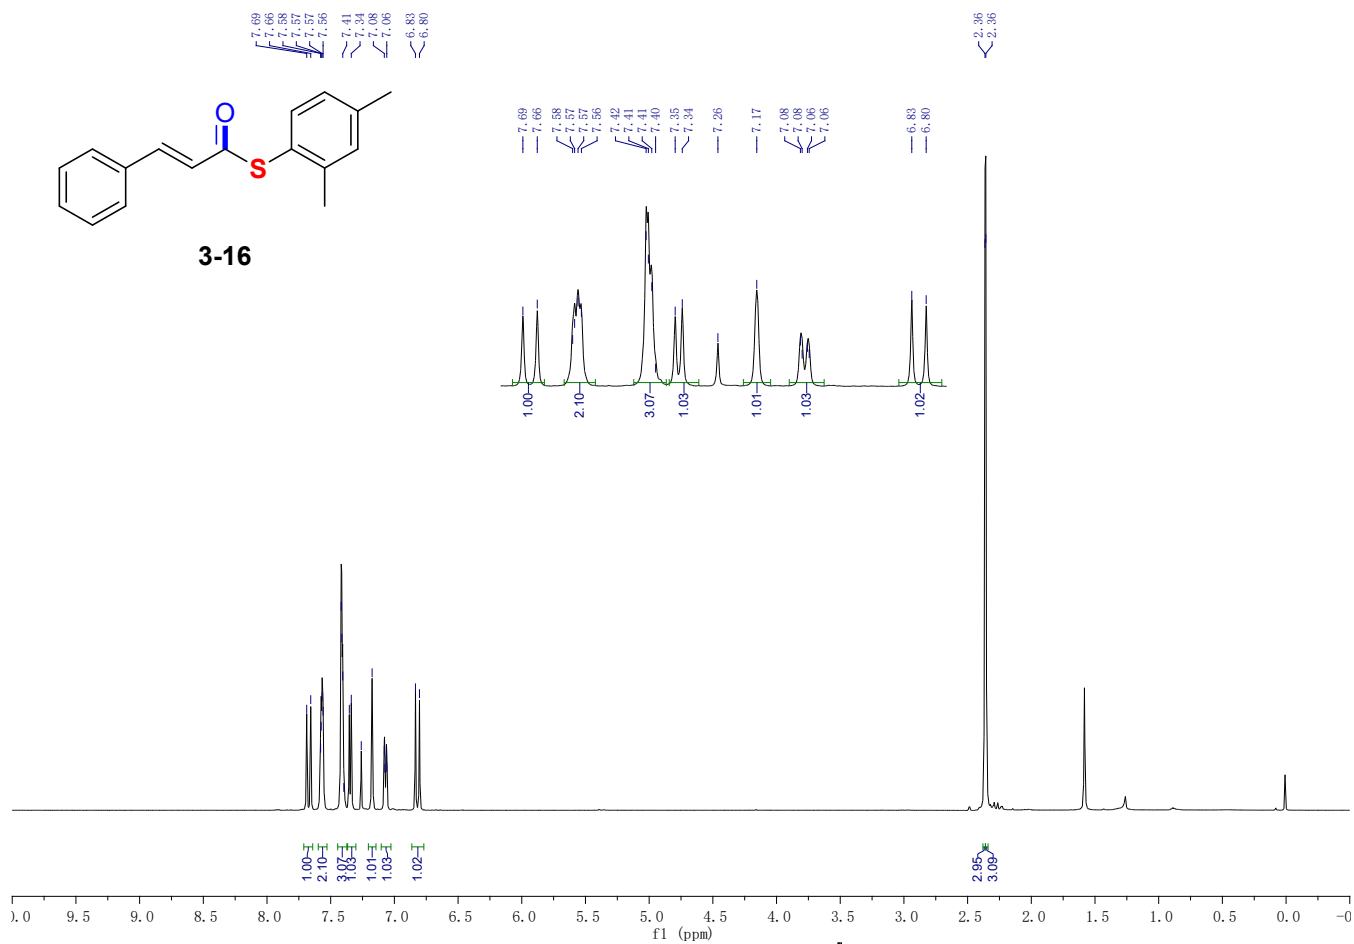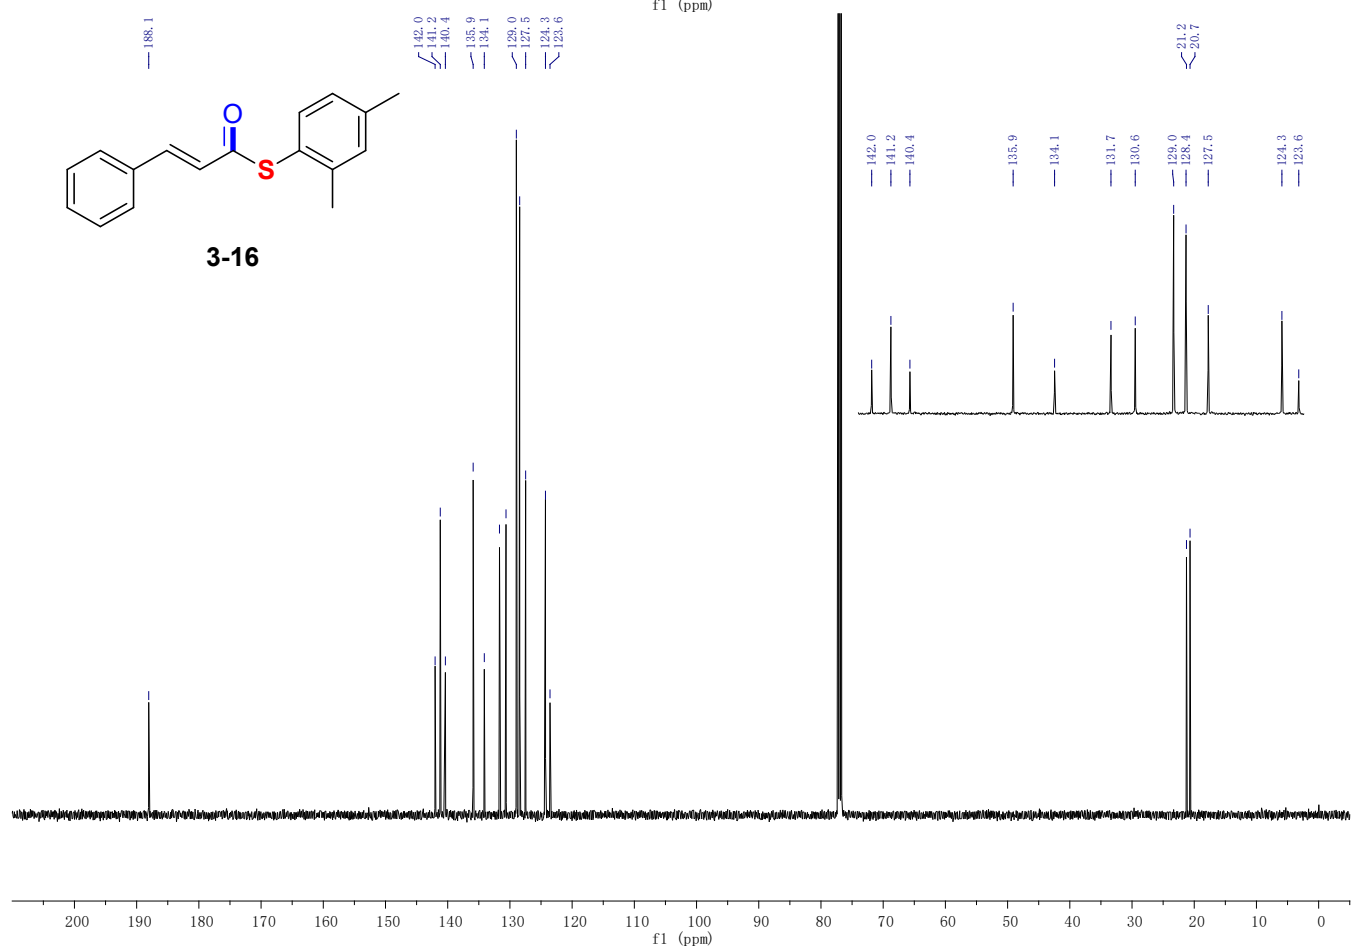

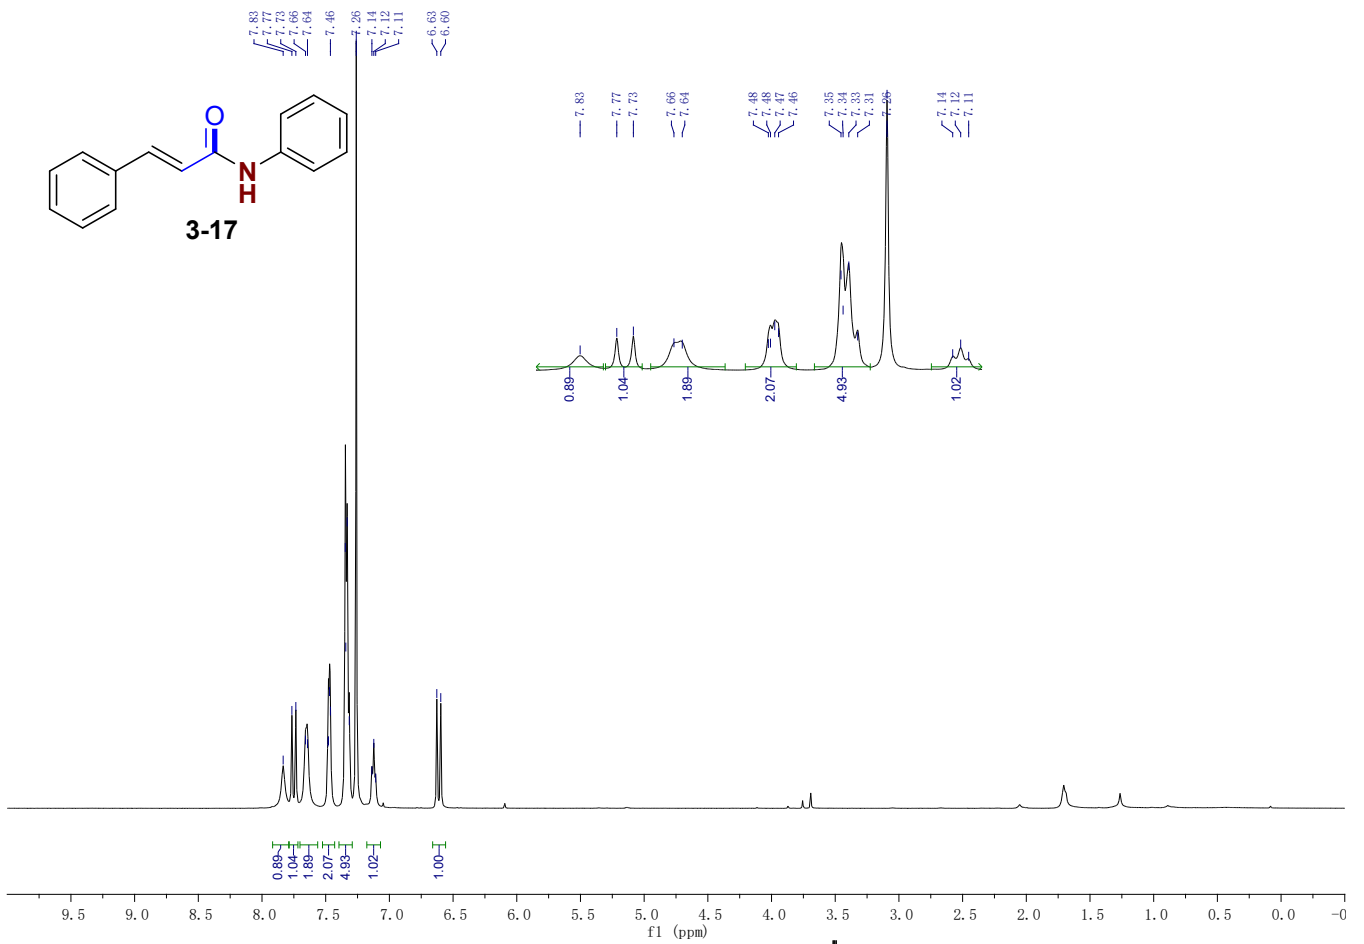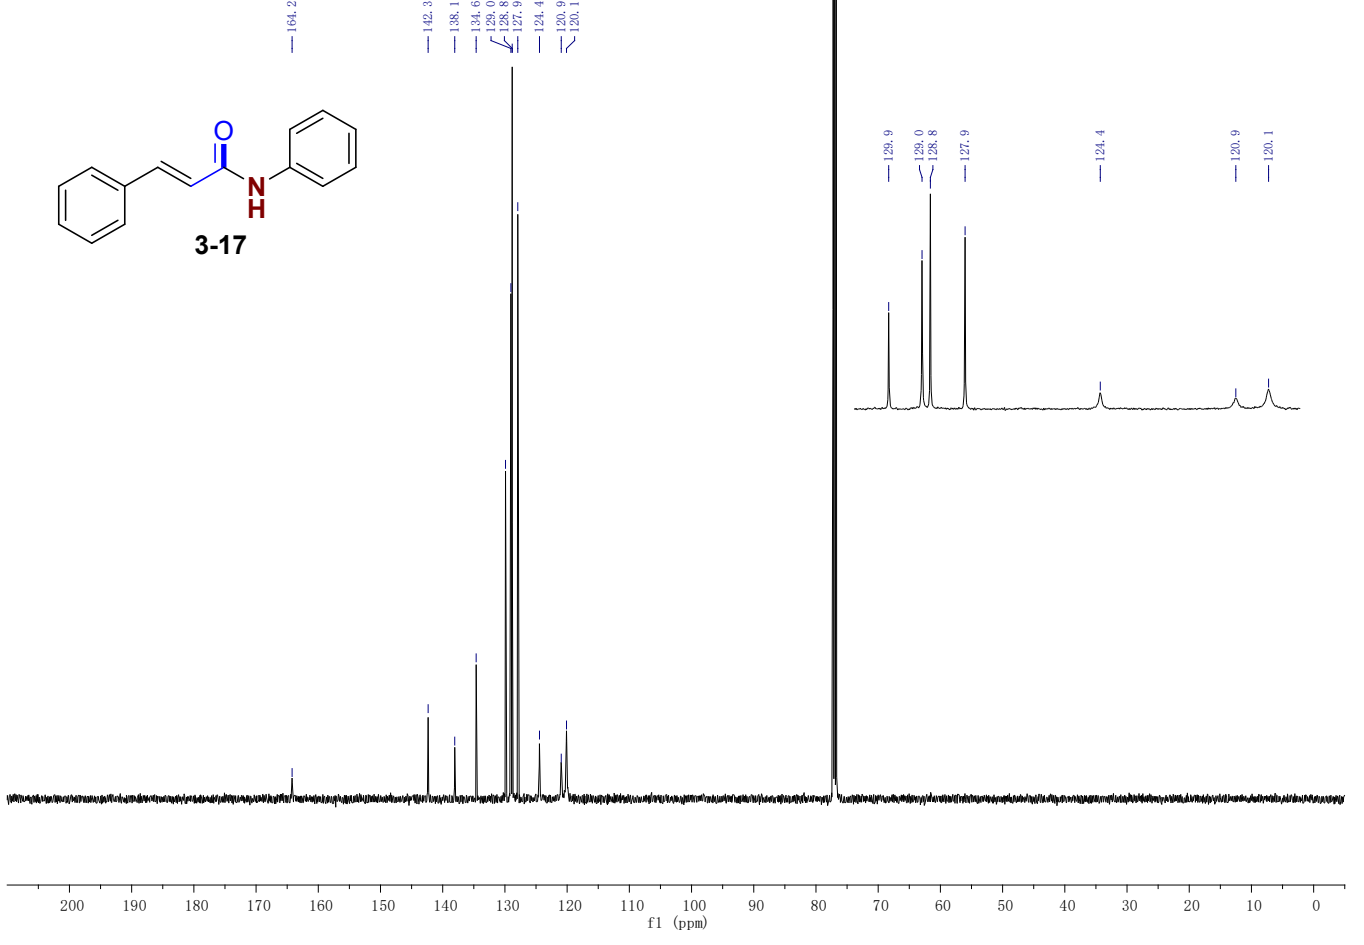

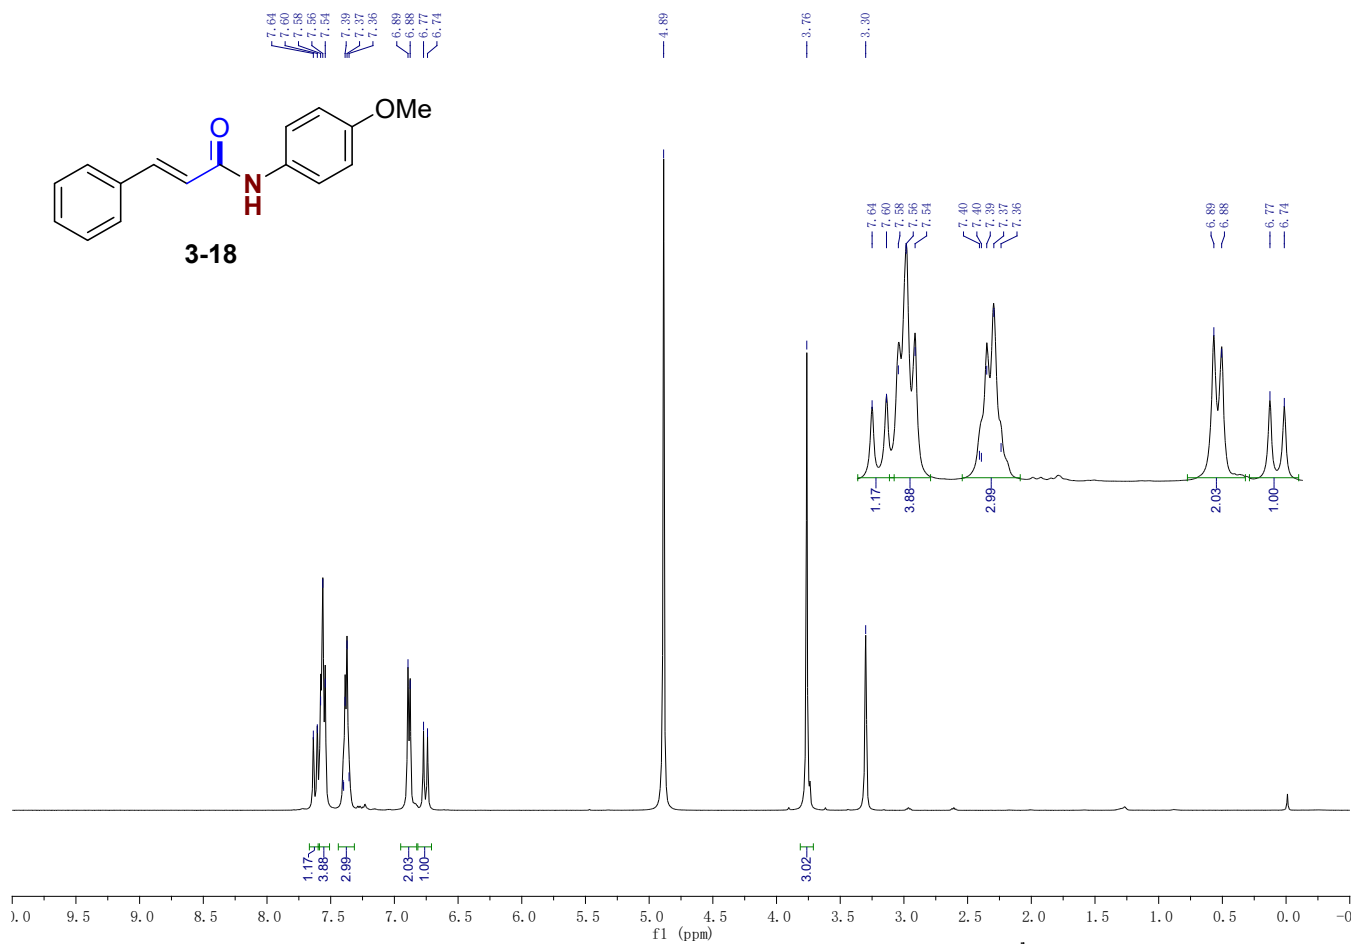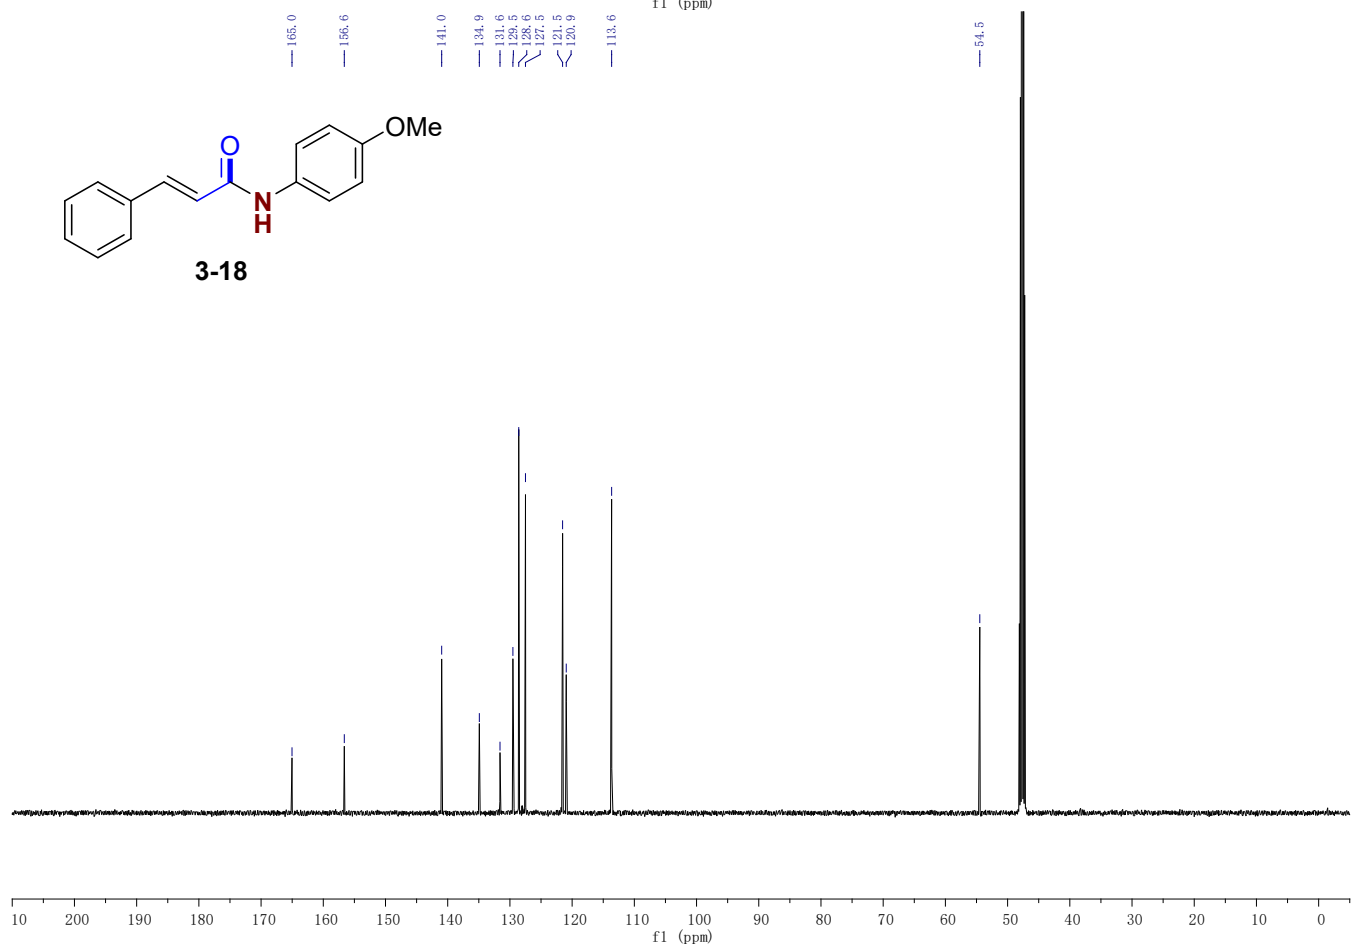

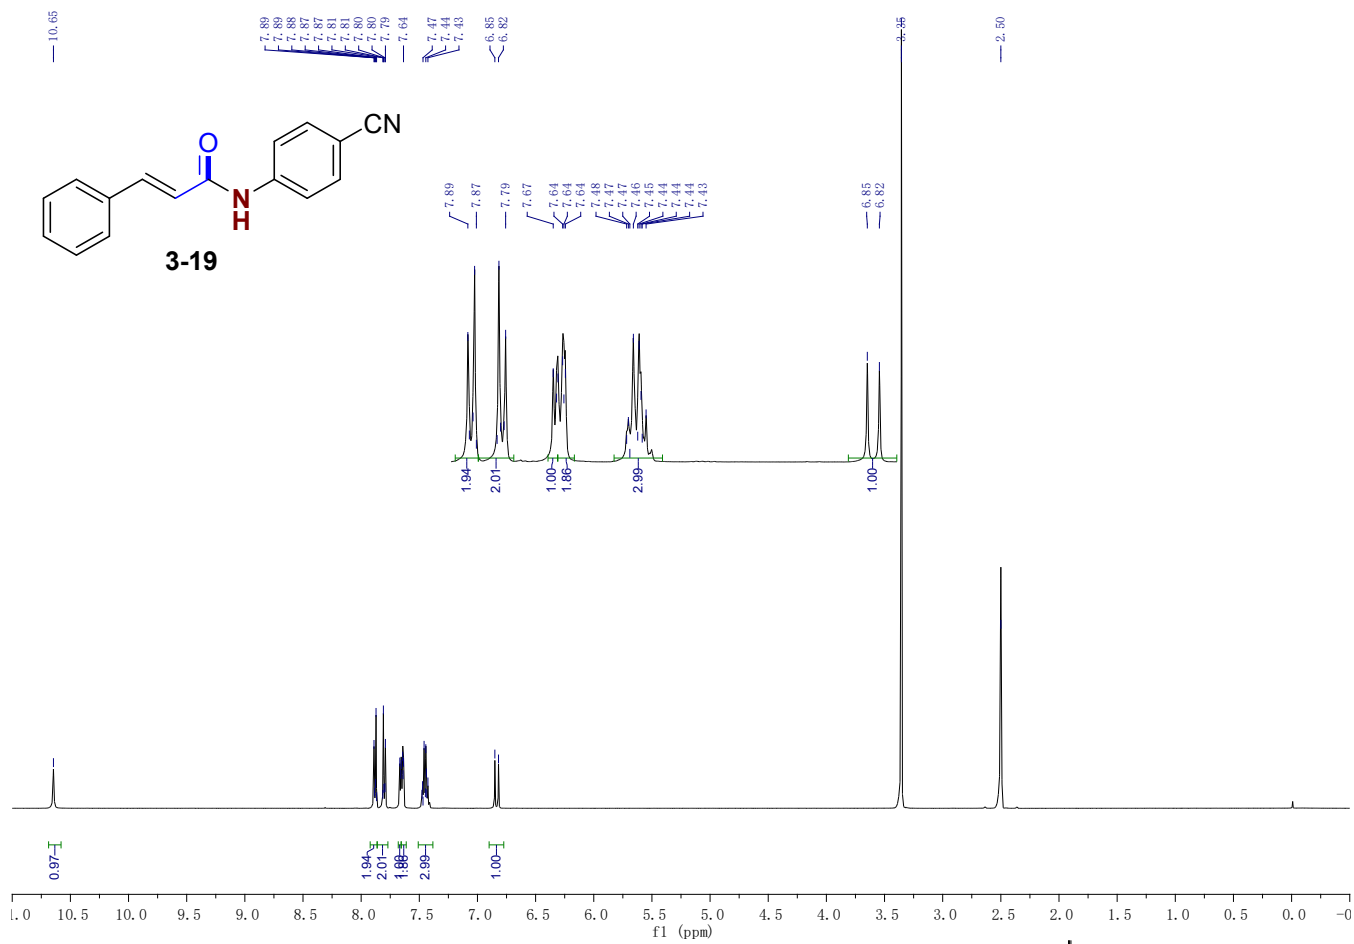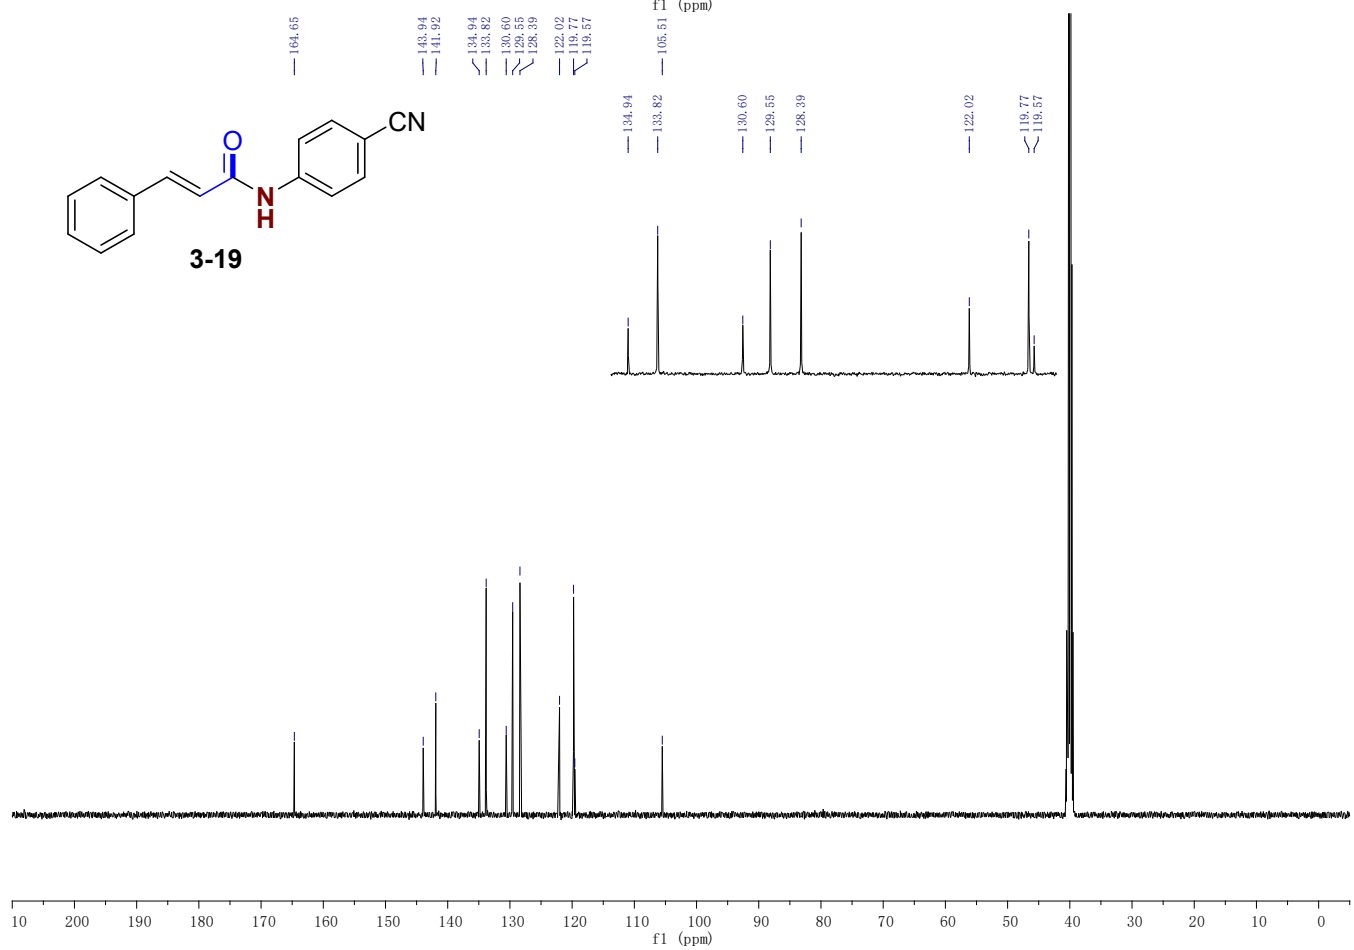



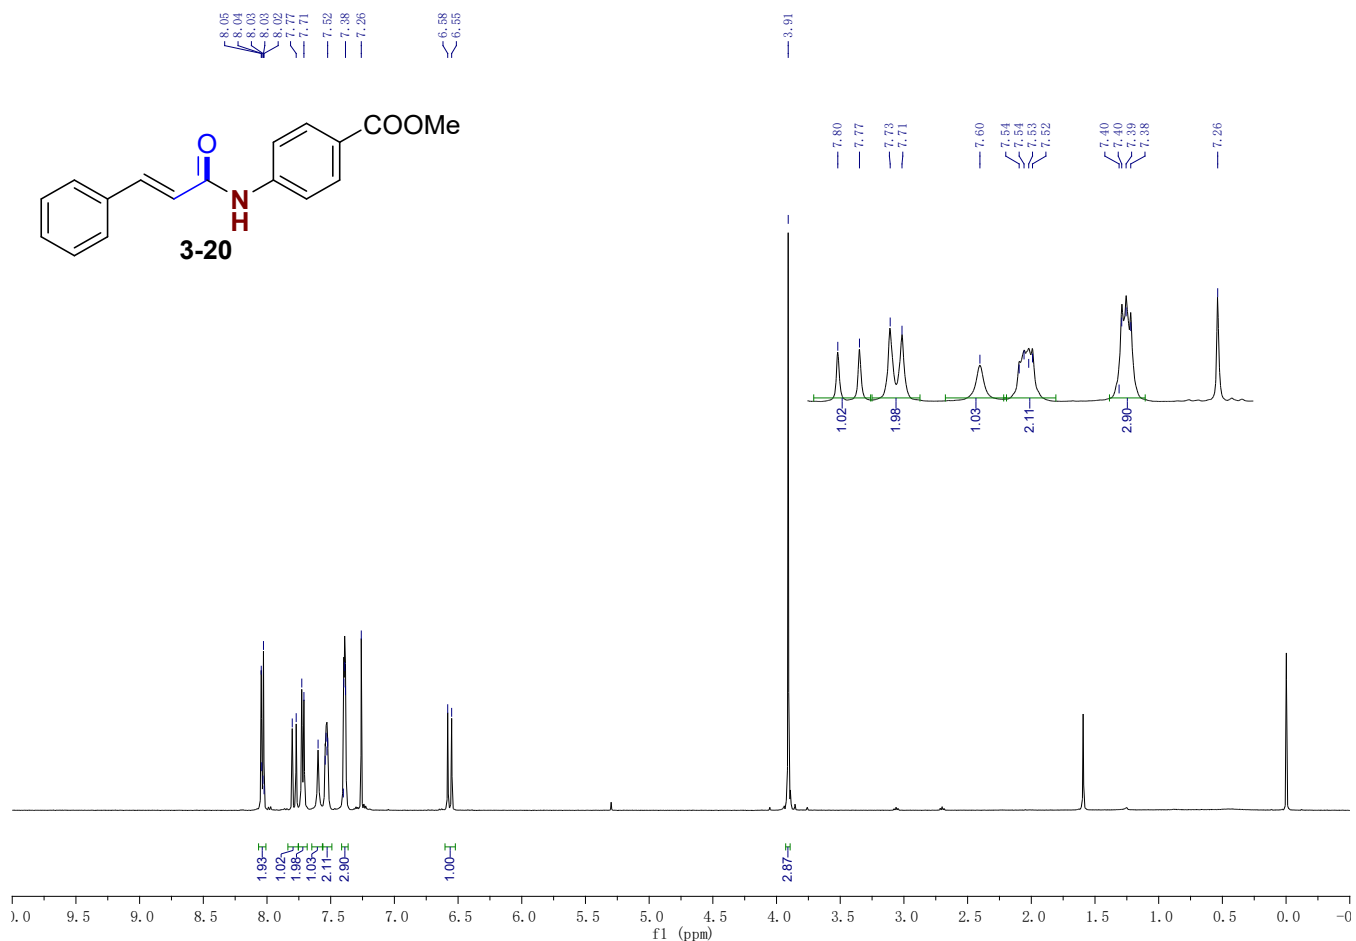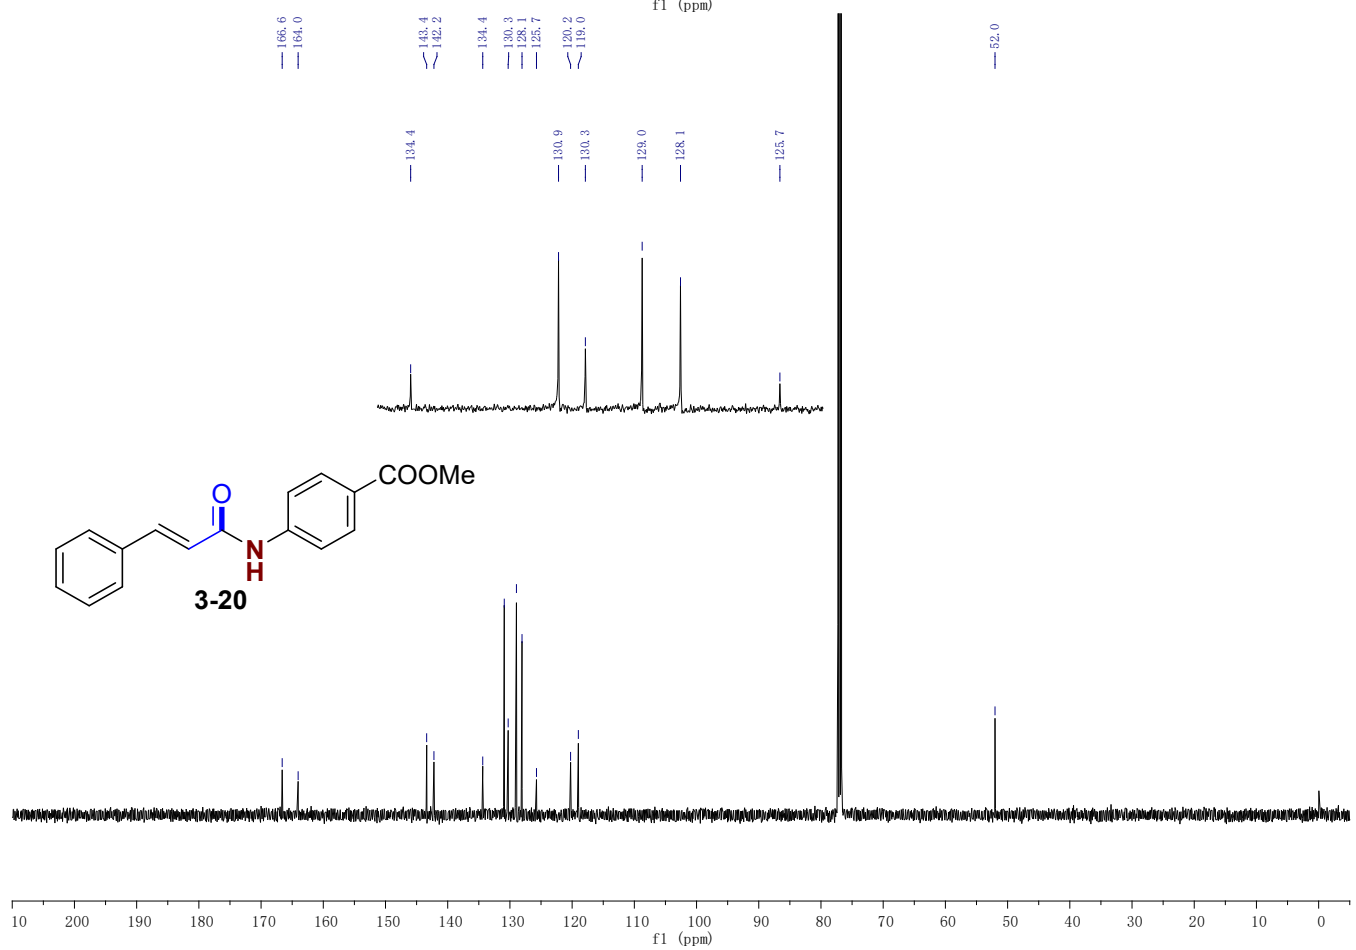

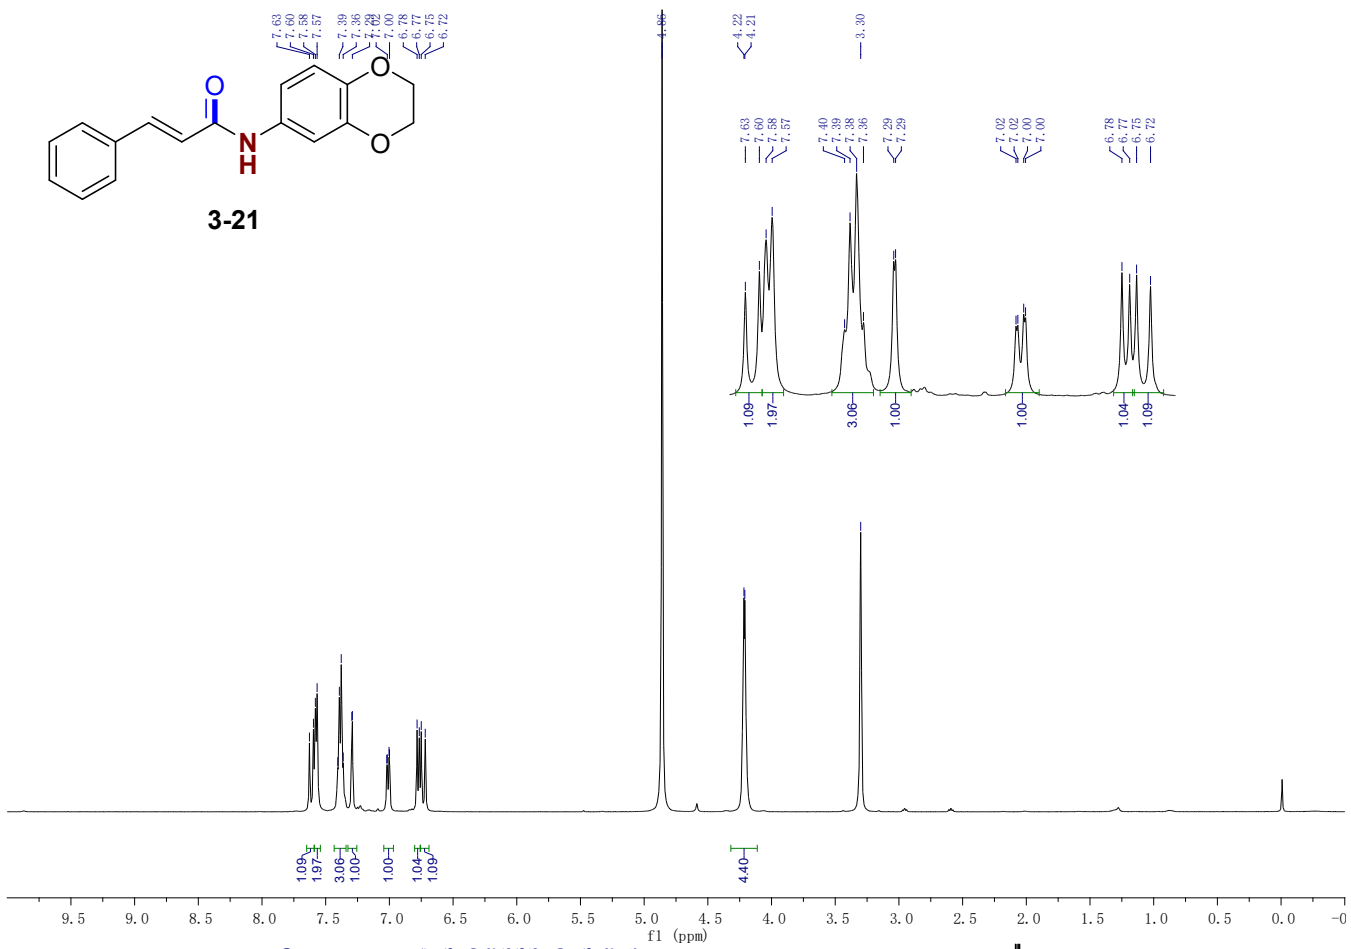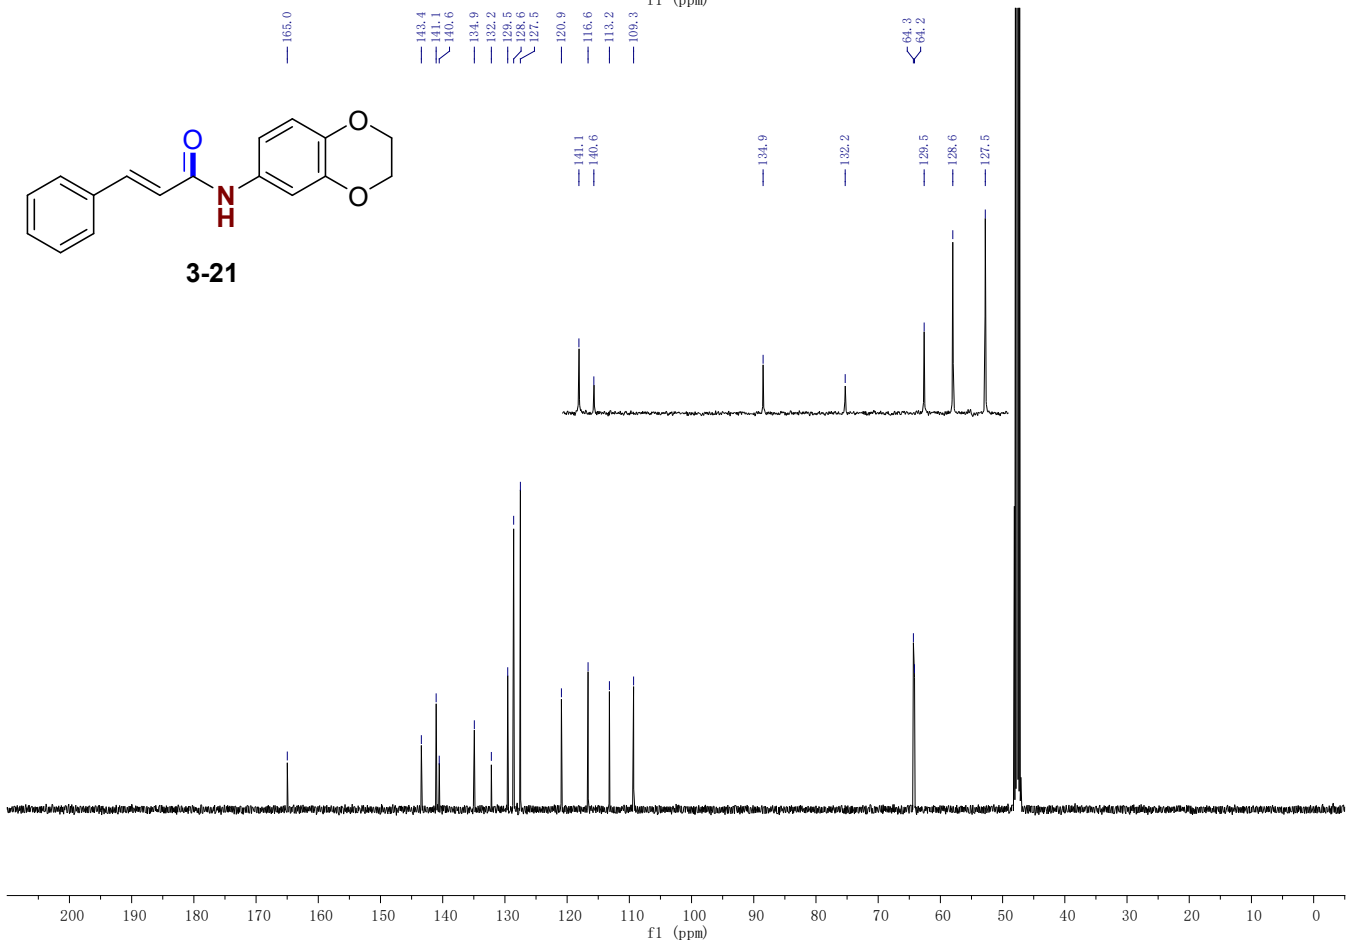

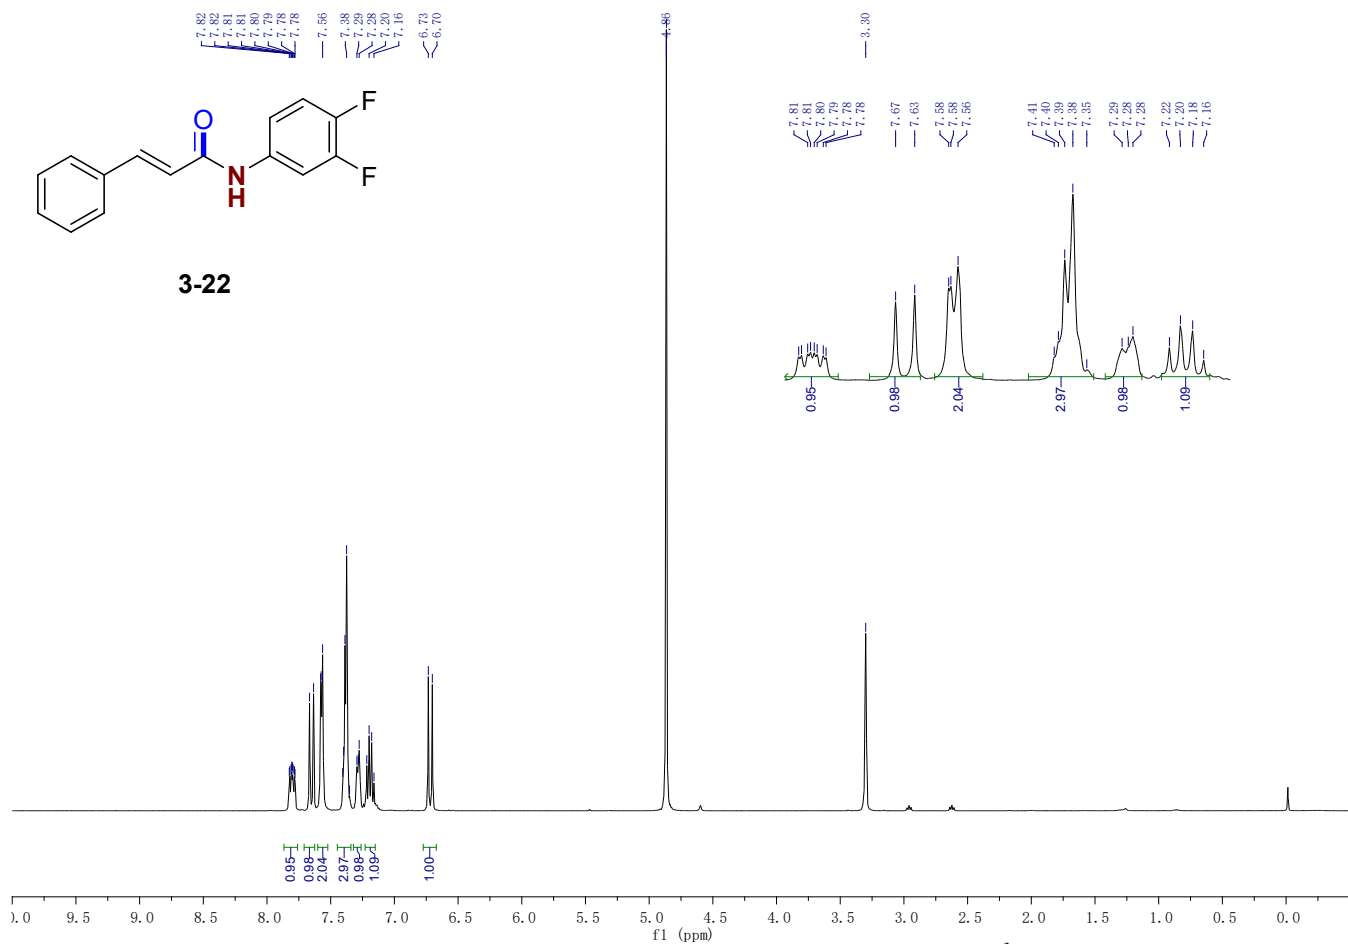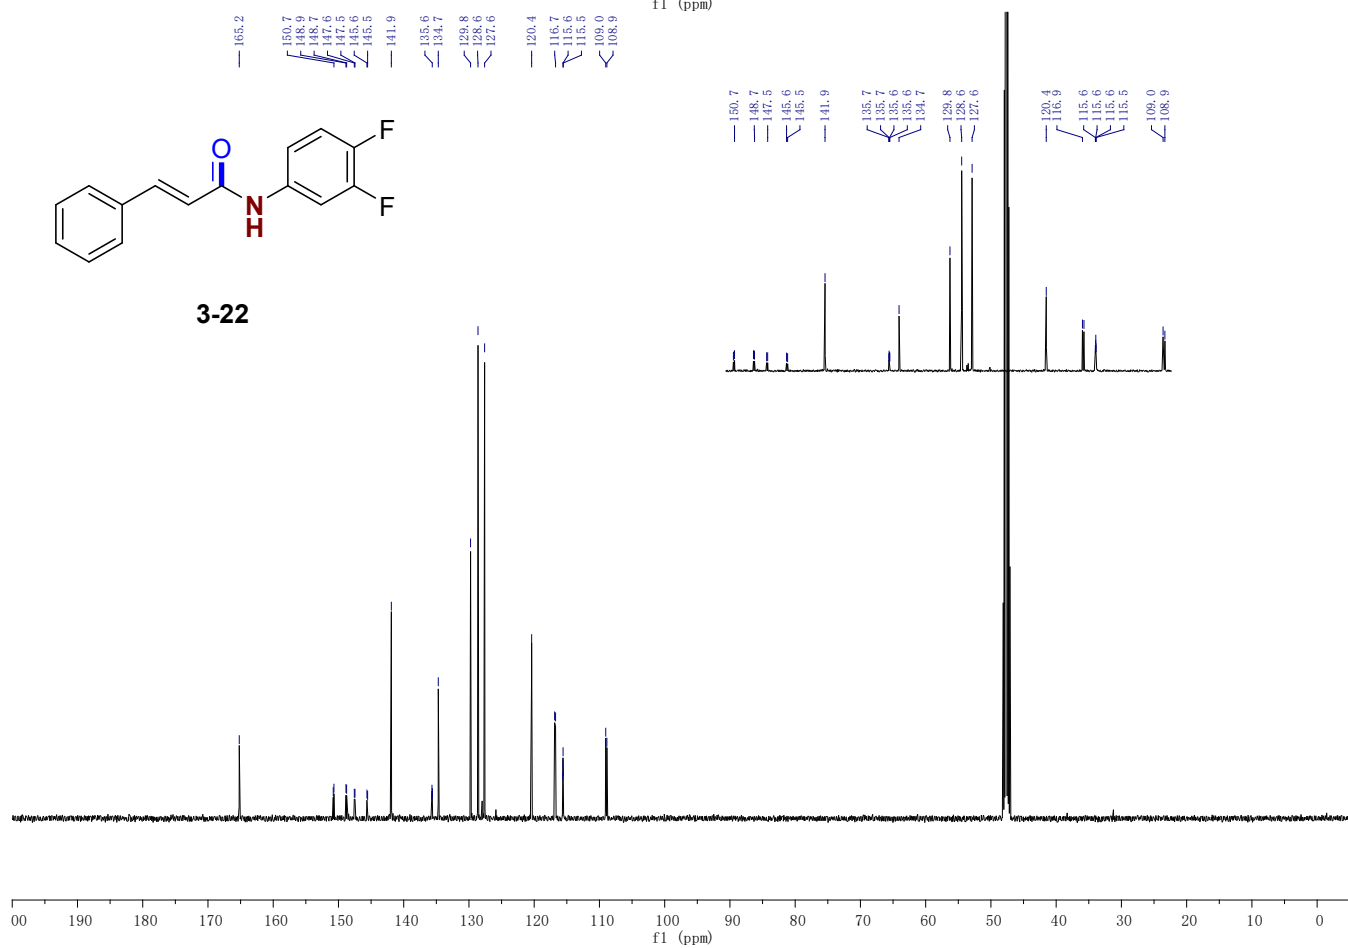

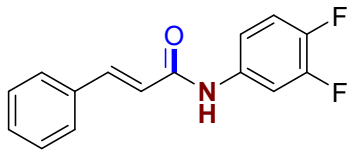

3-22

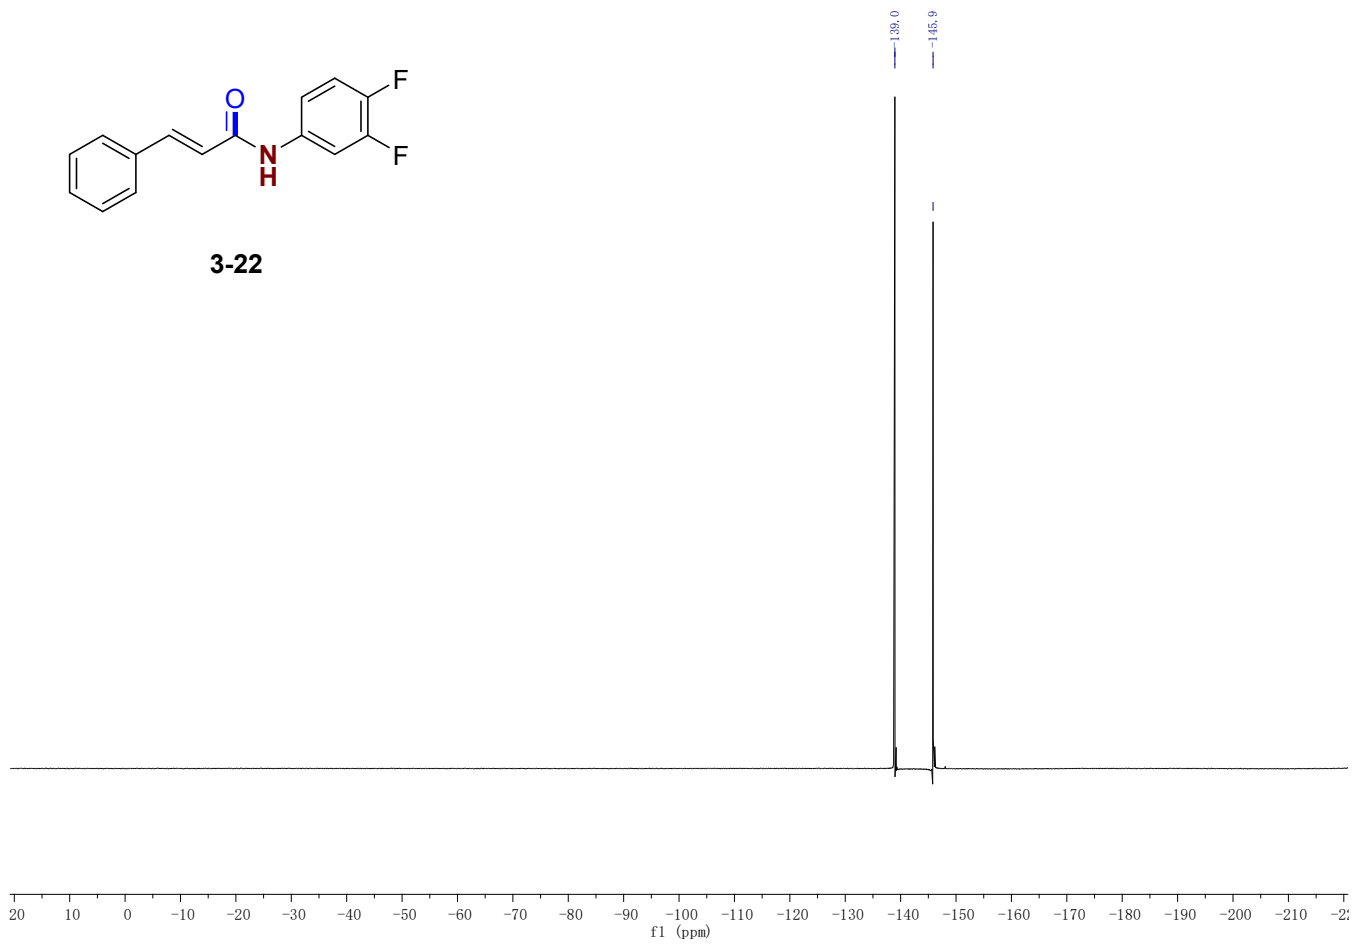

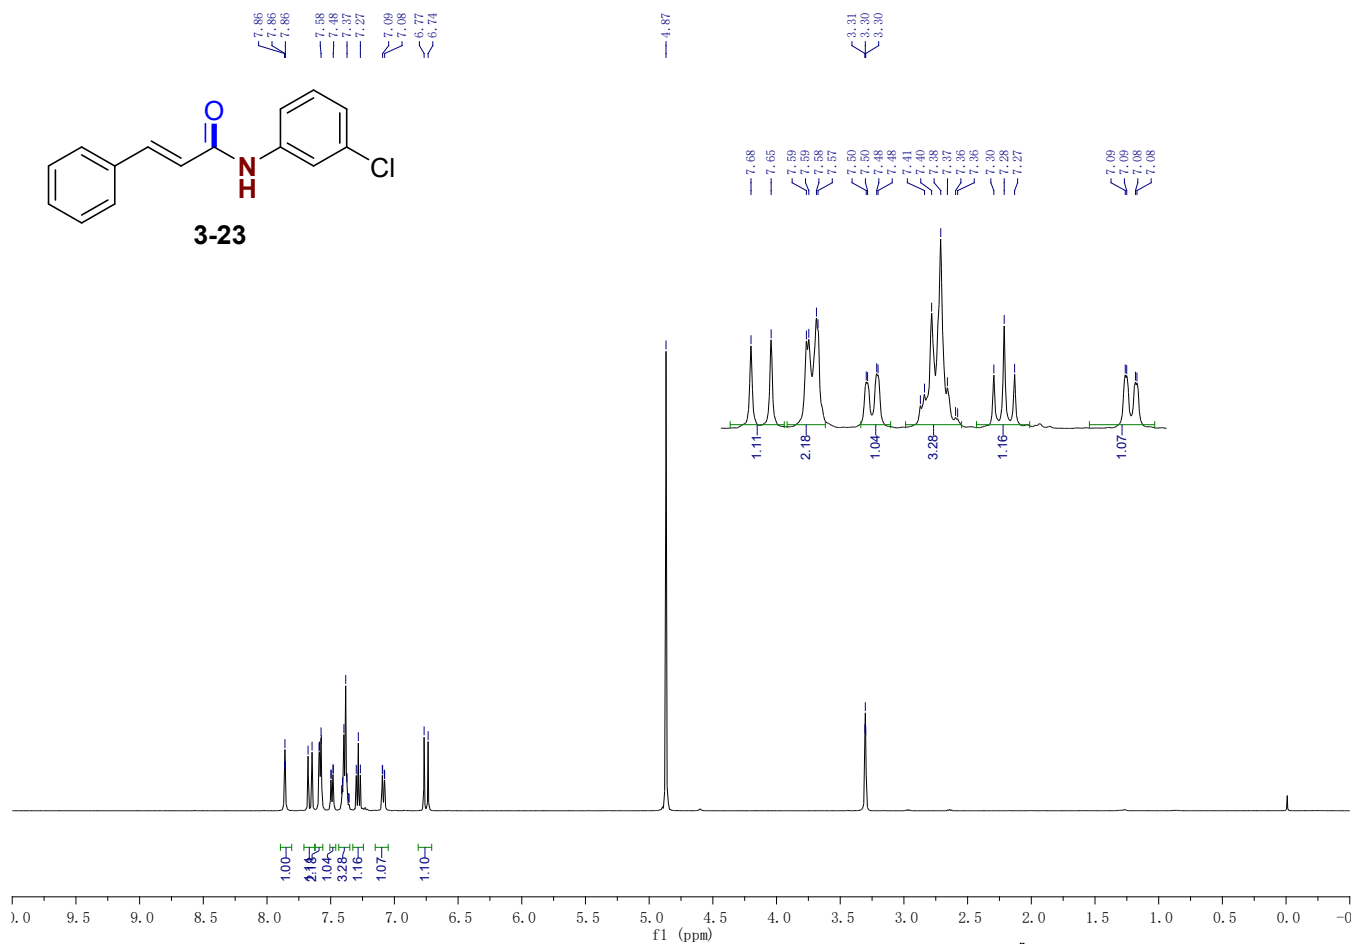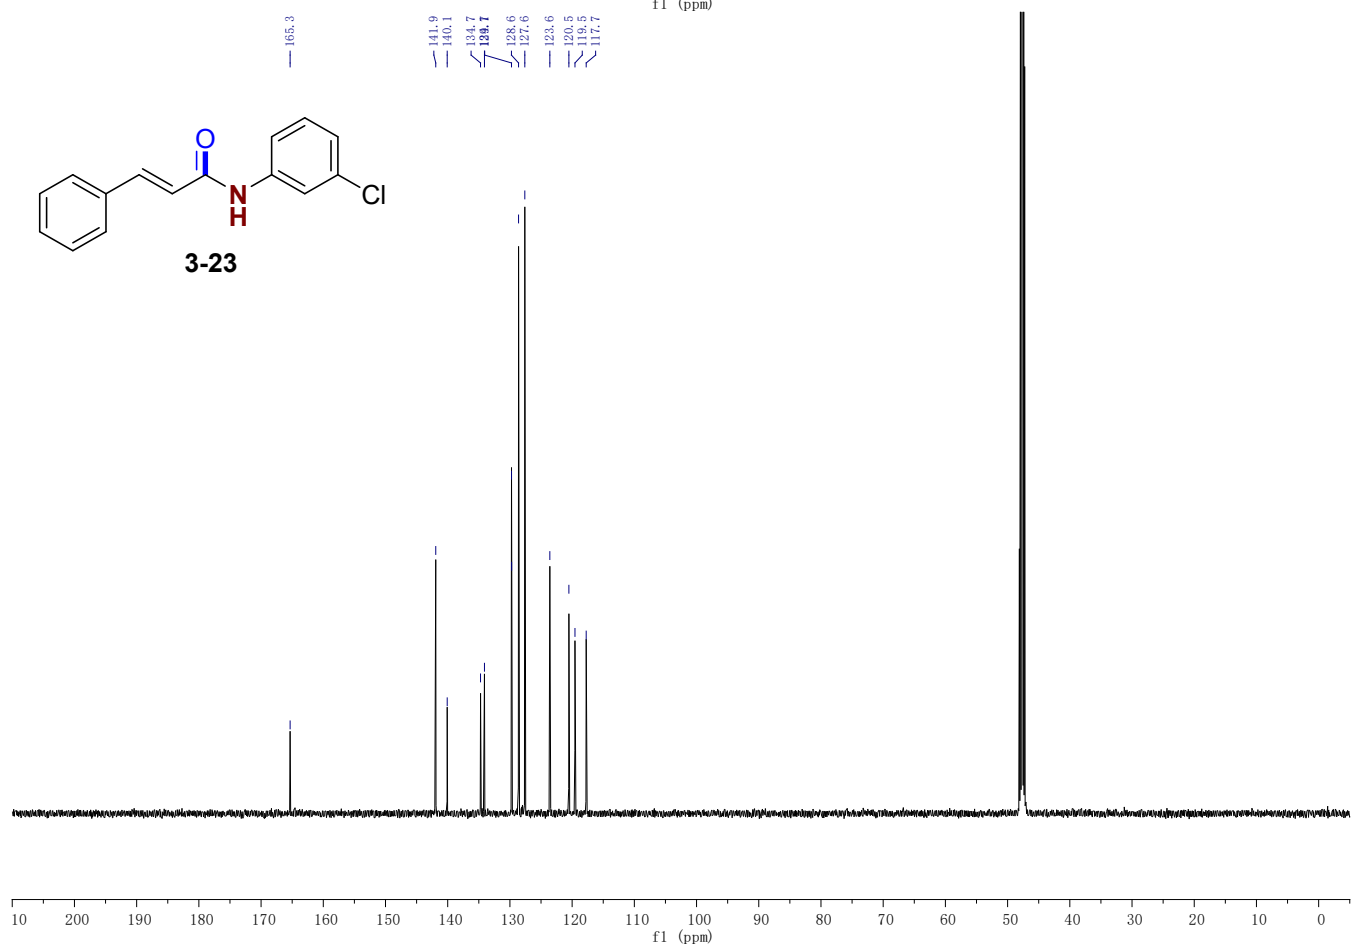

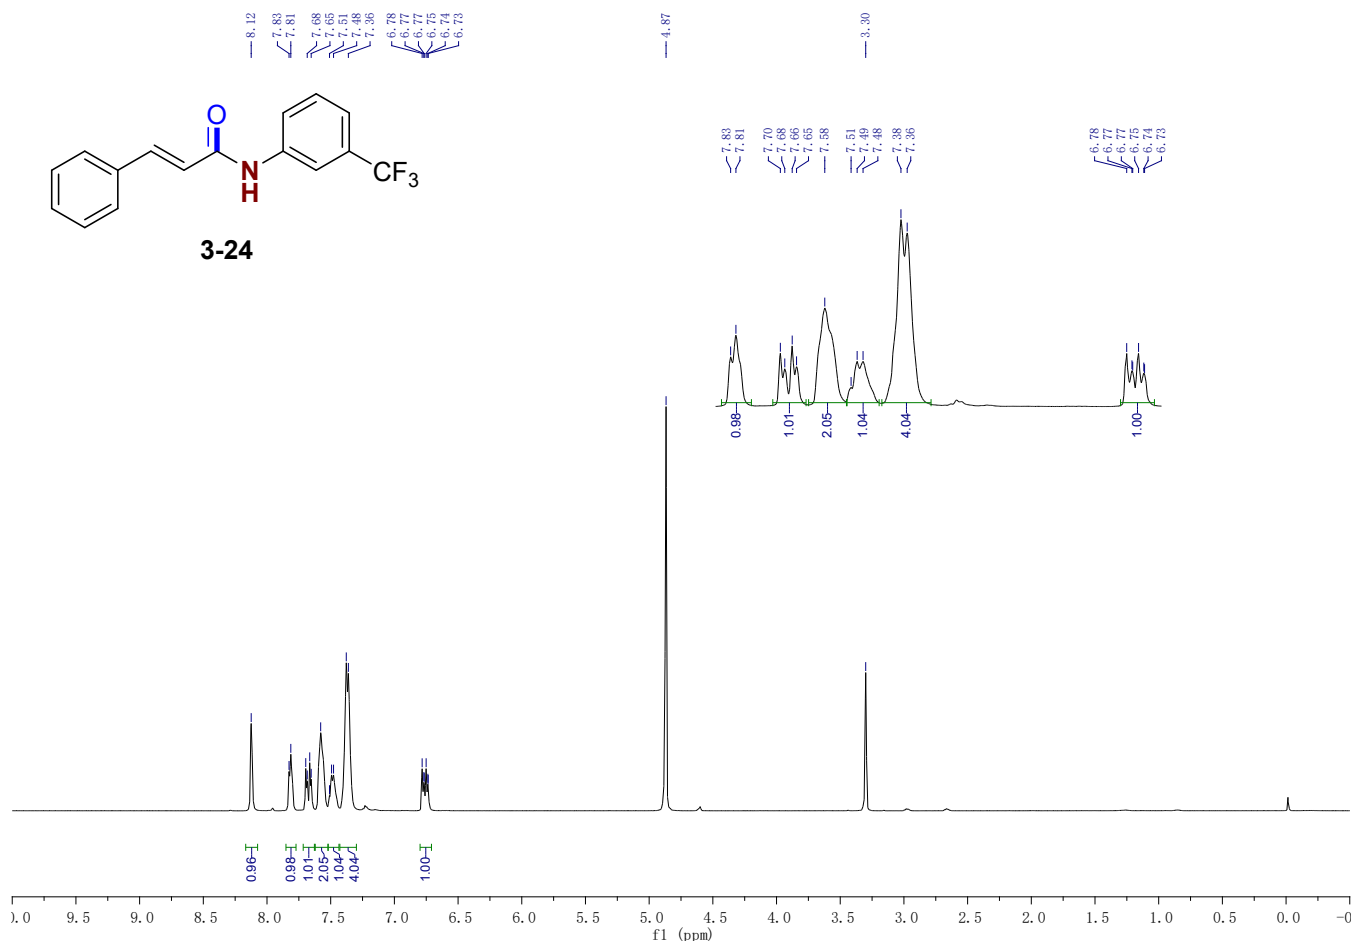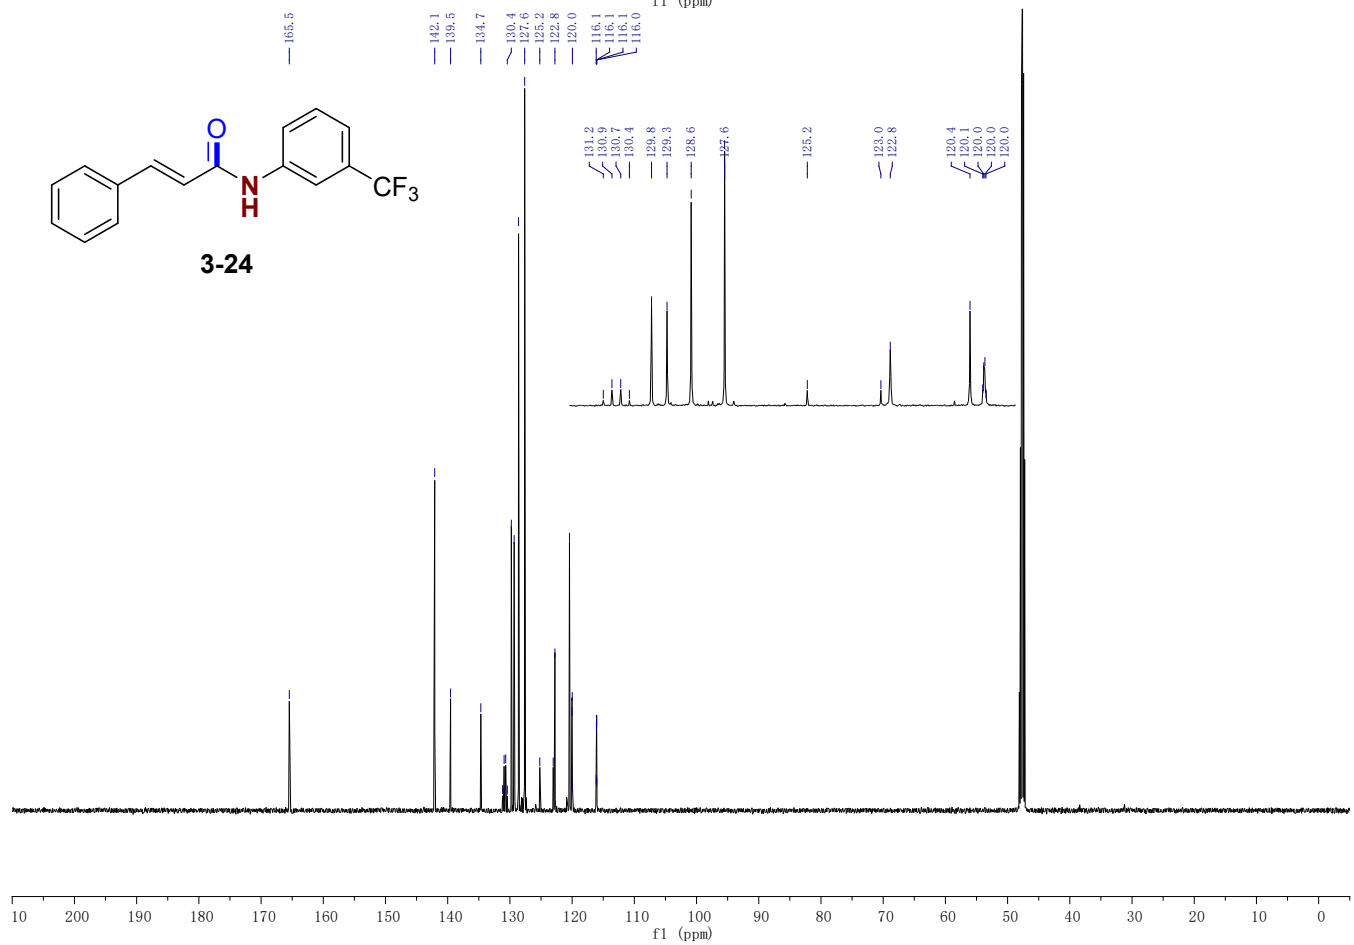

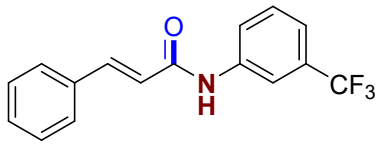

3-24

64.2

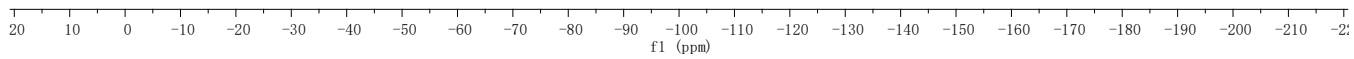

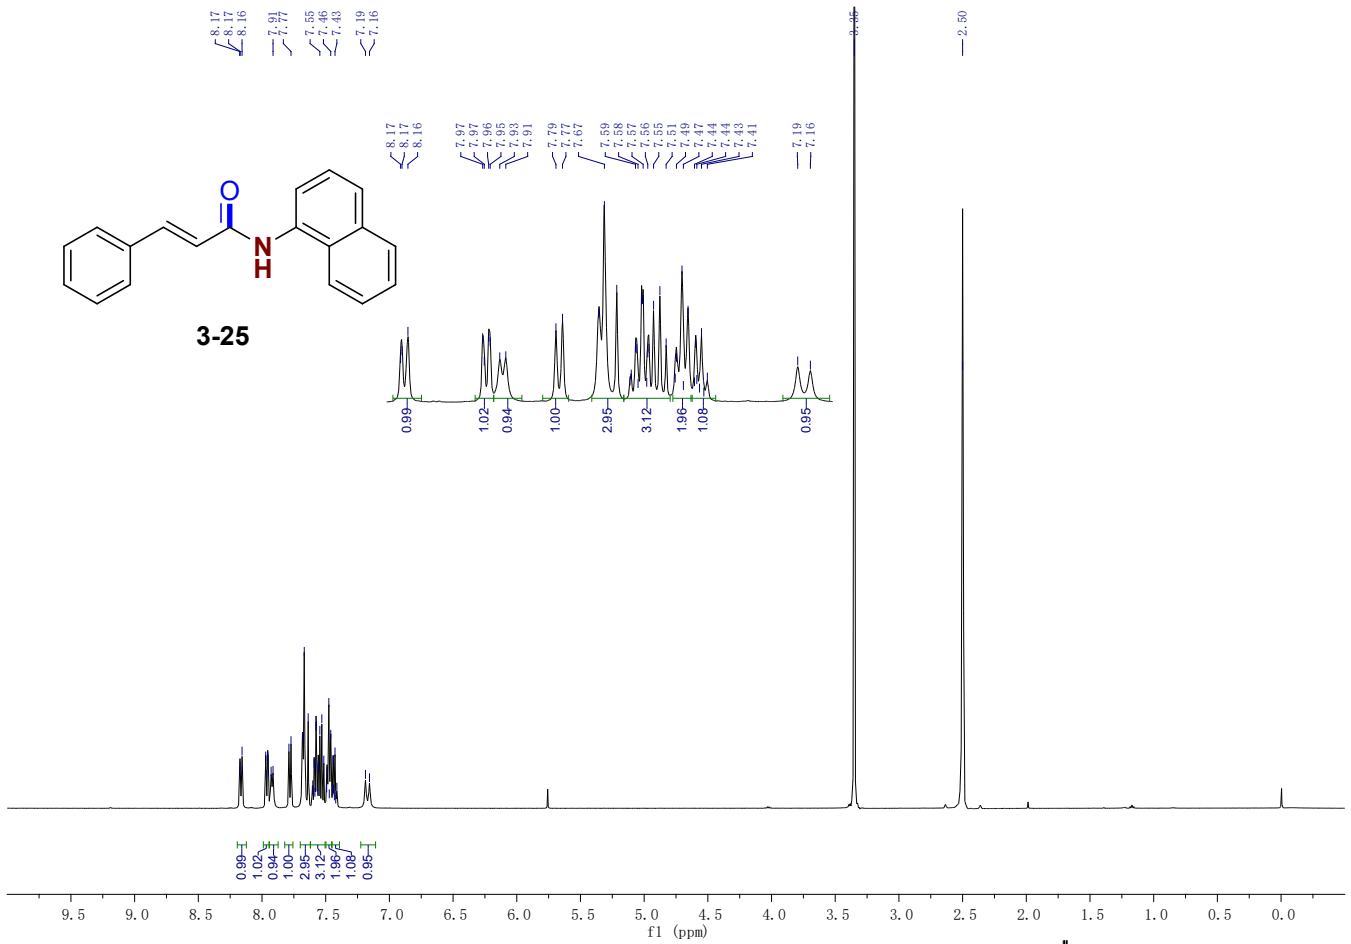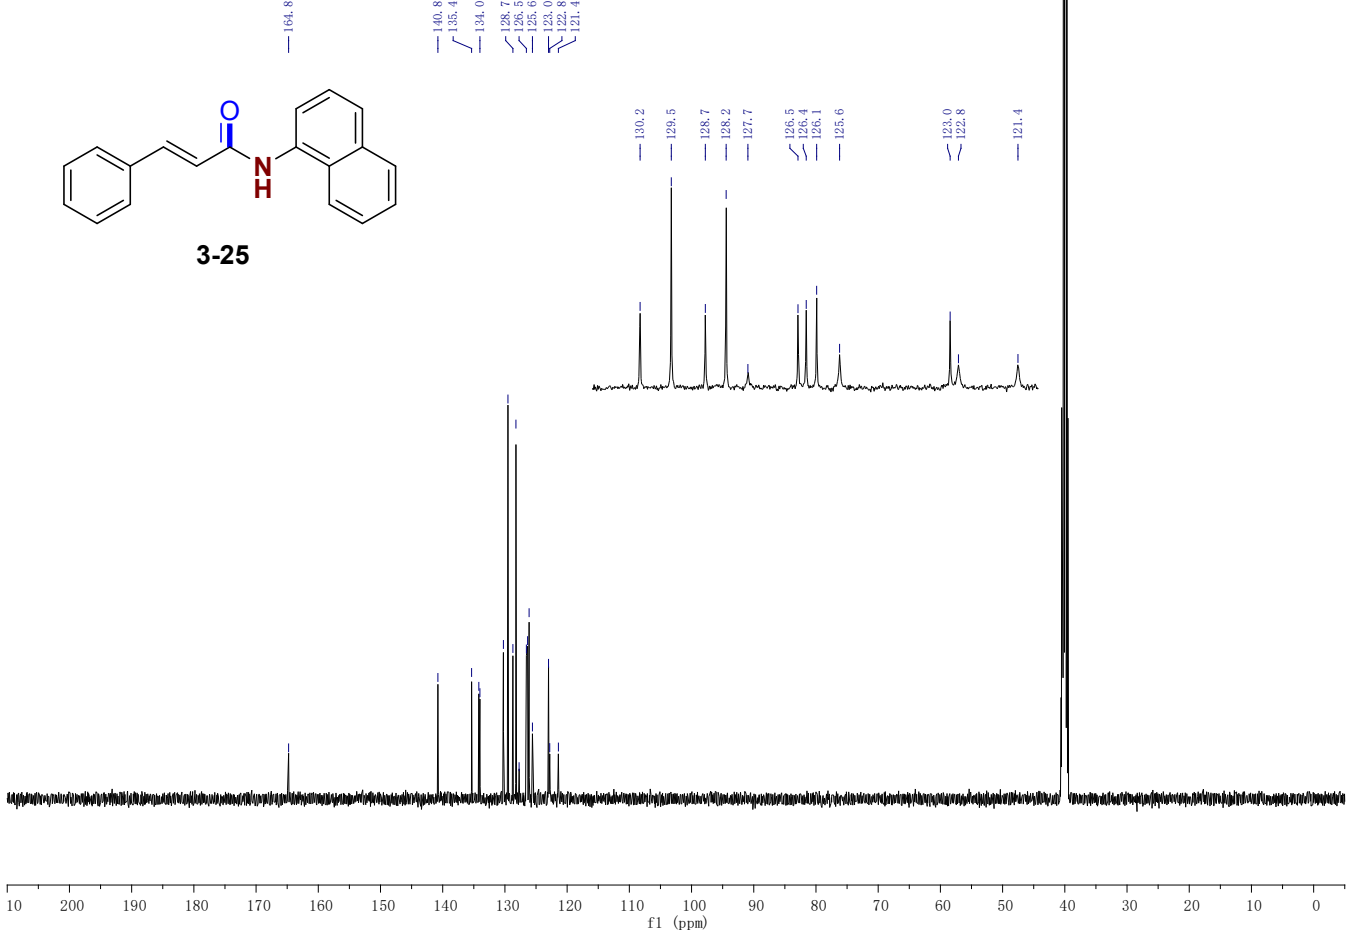



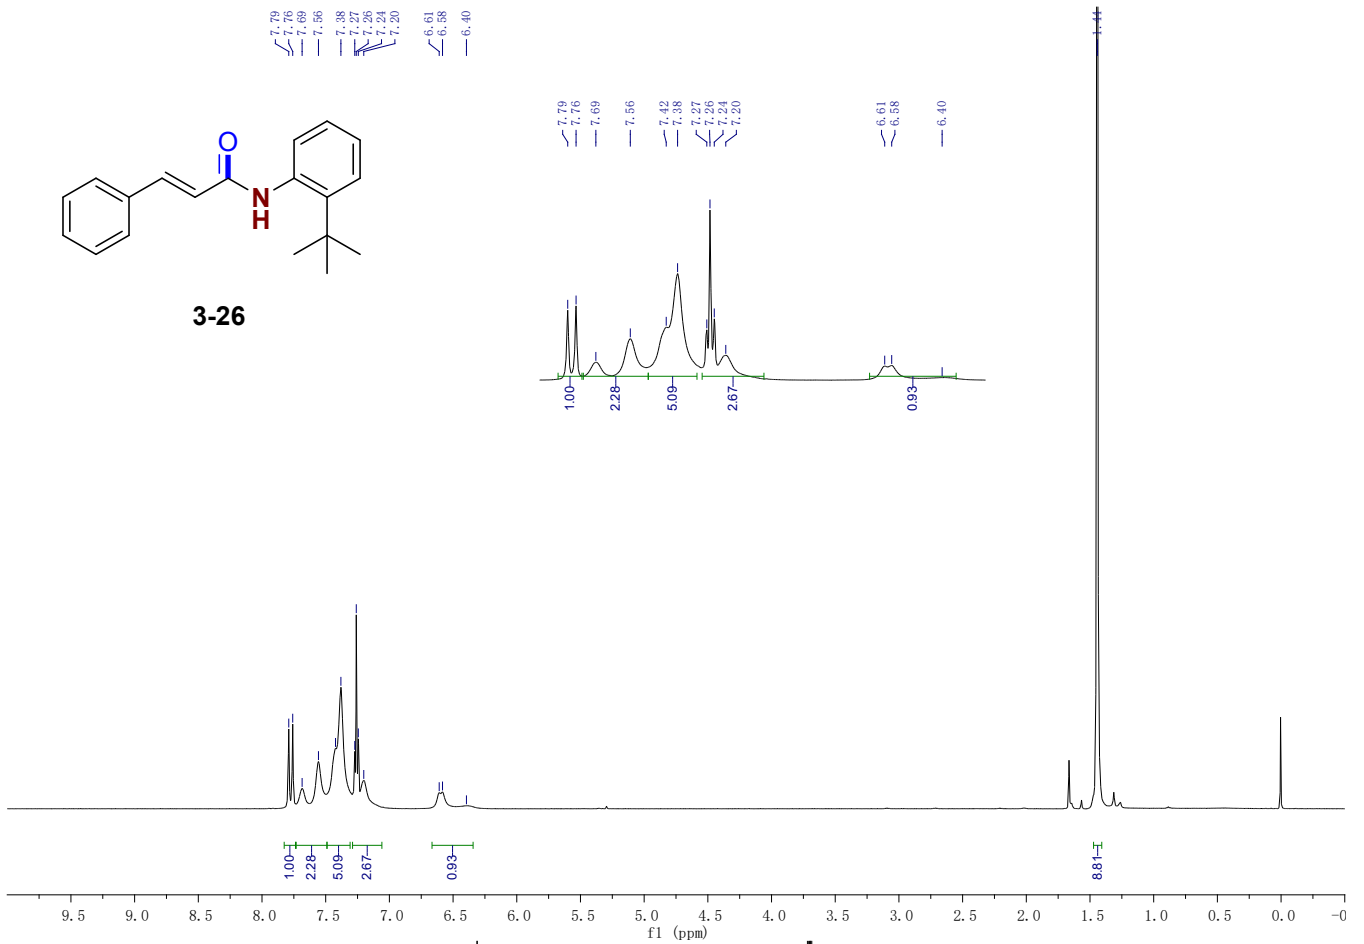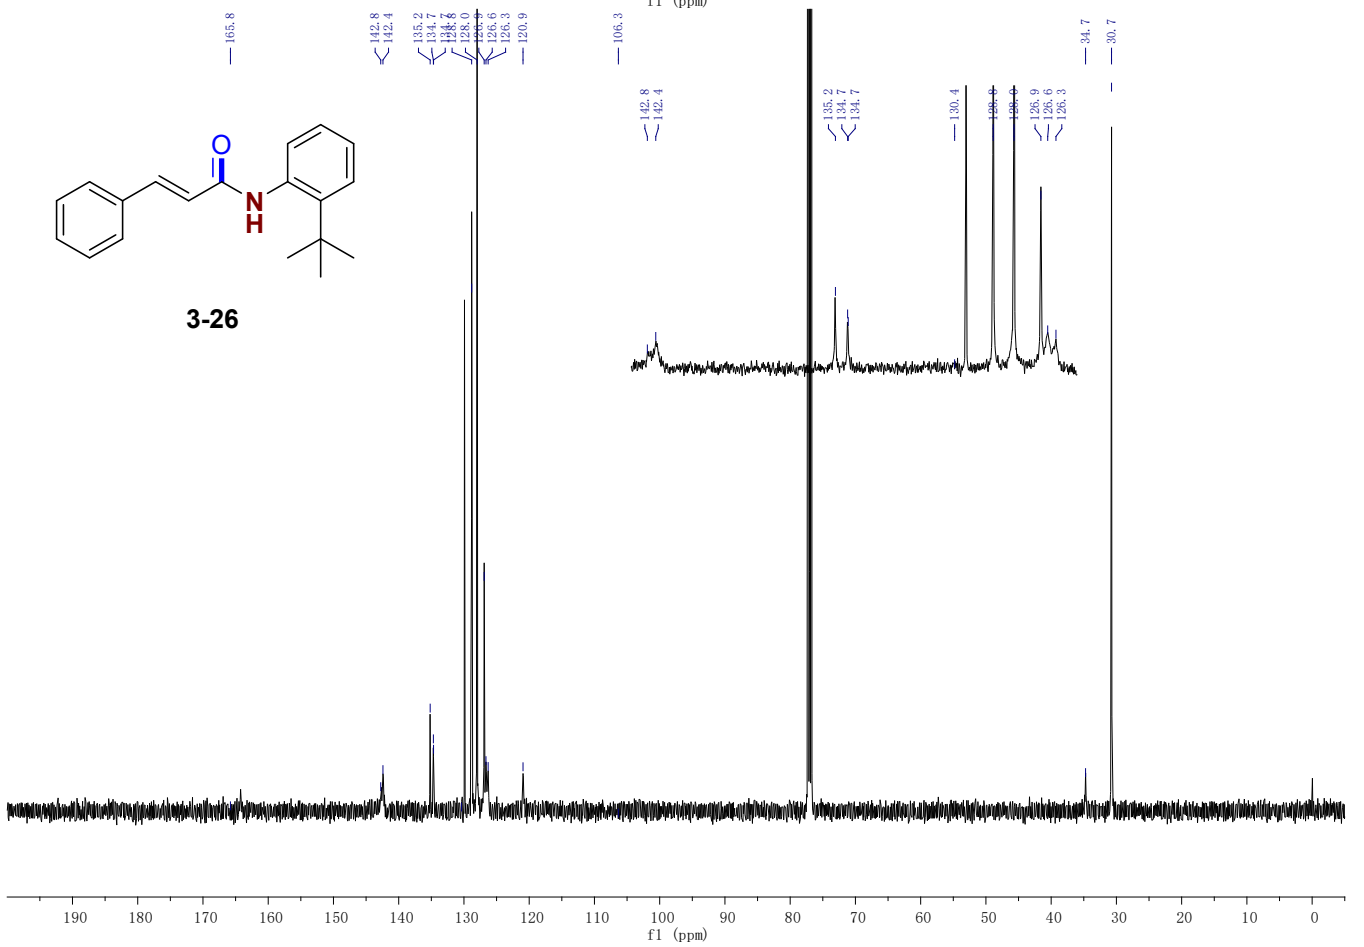

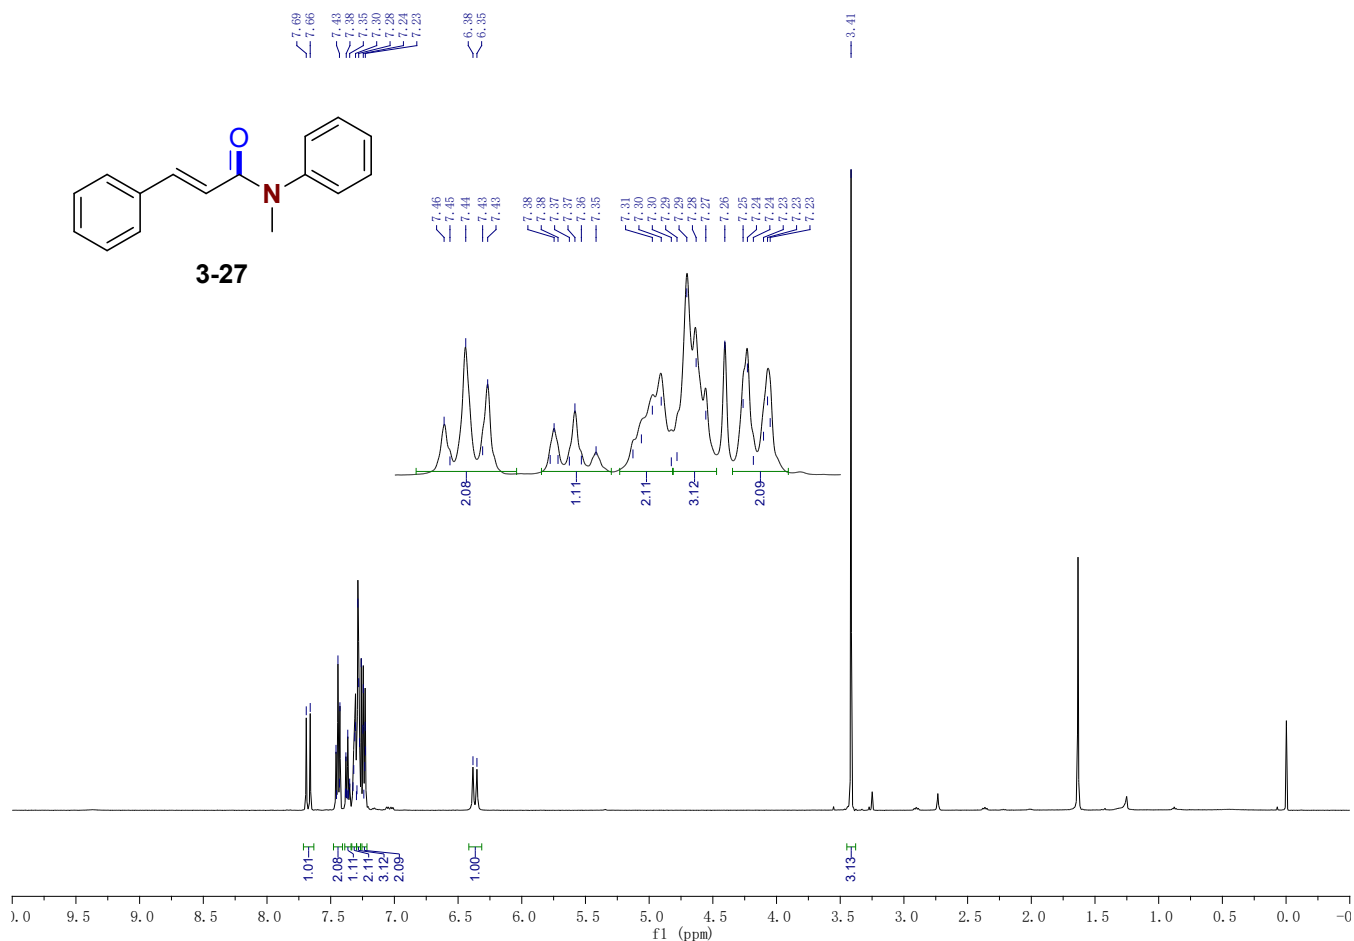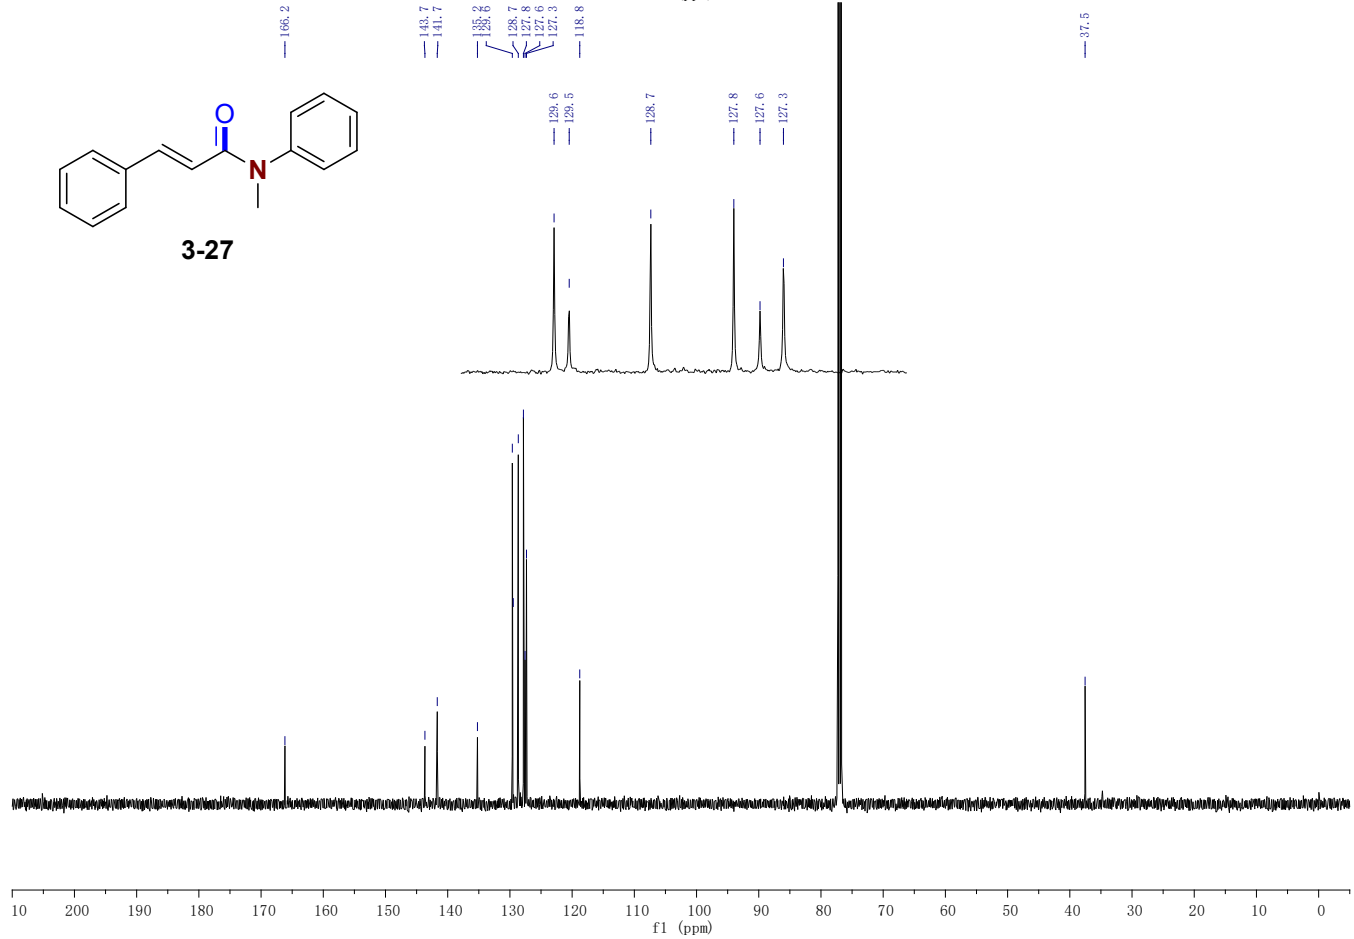

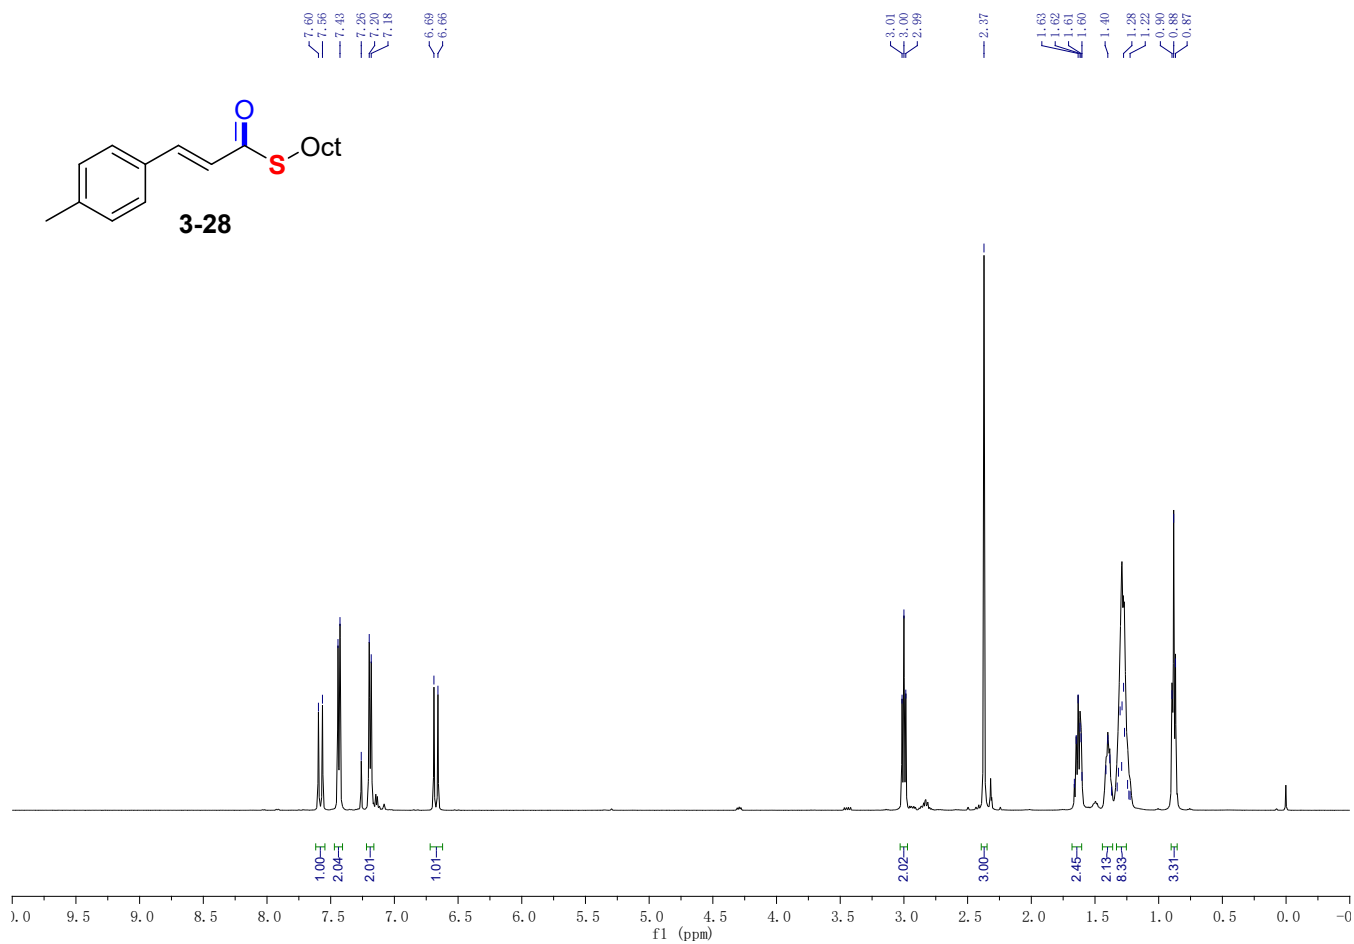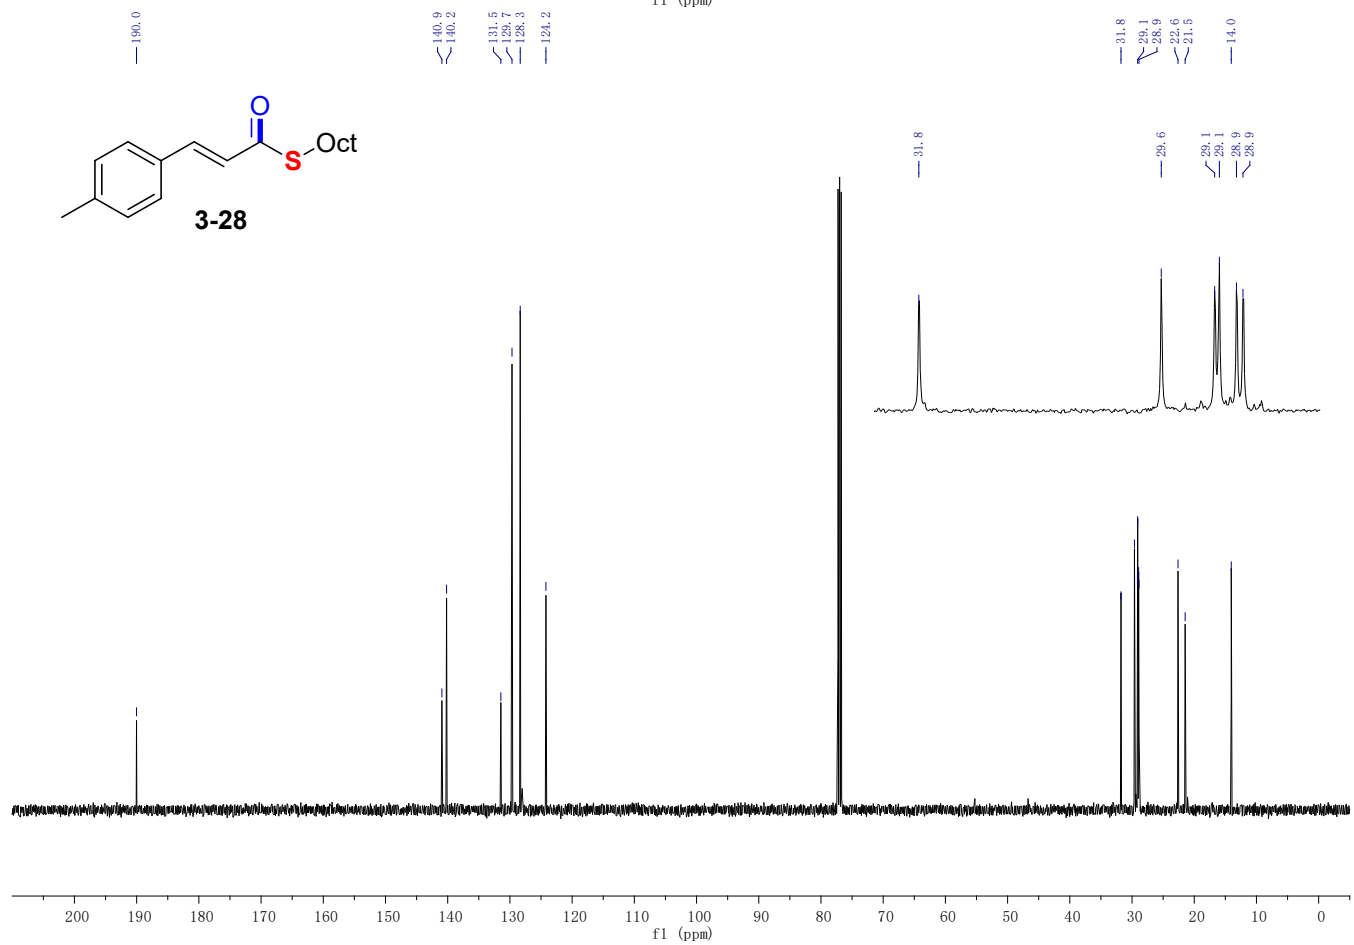

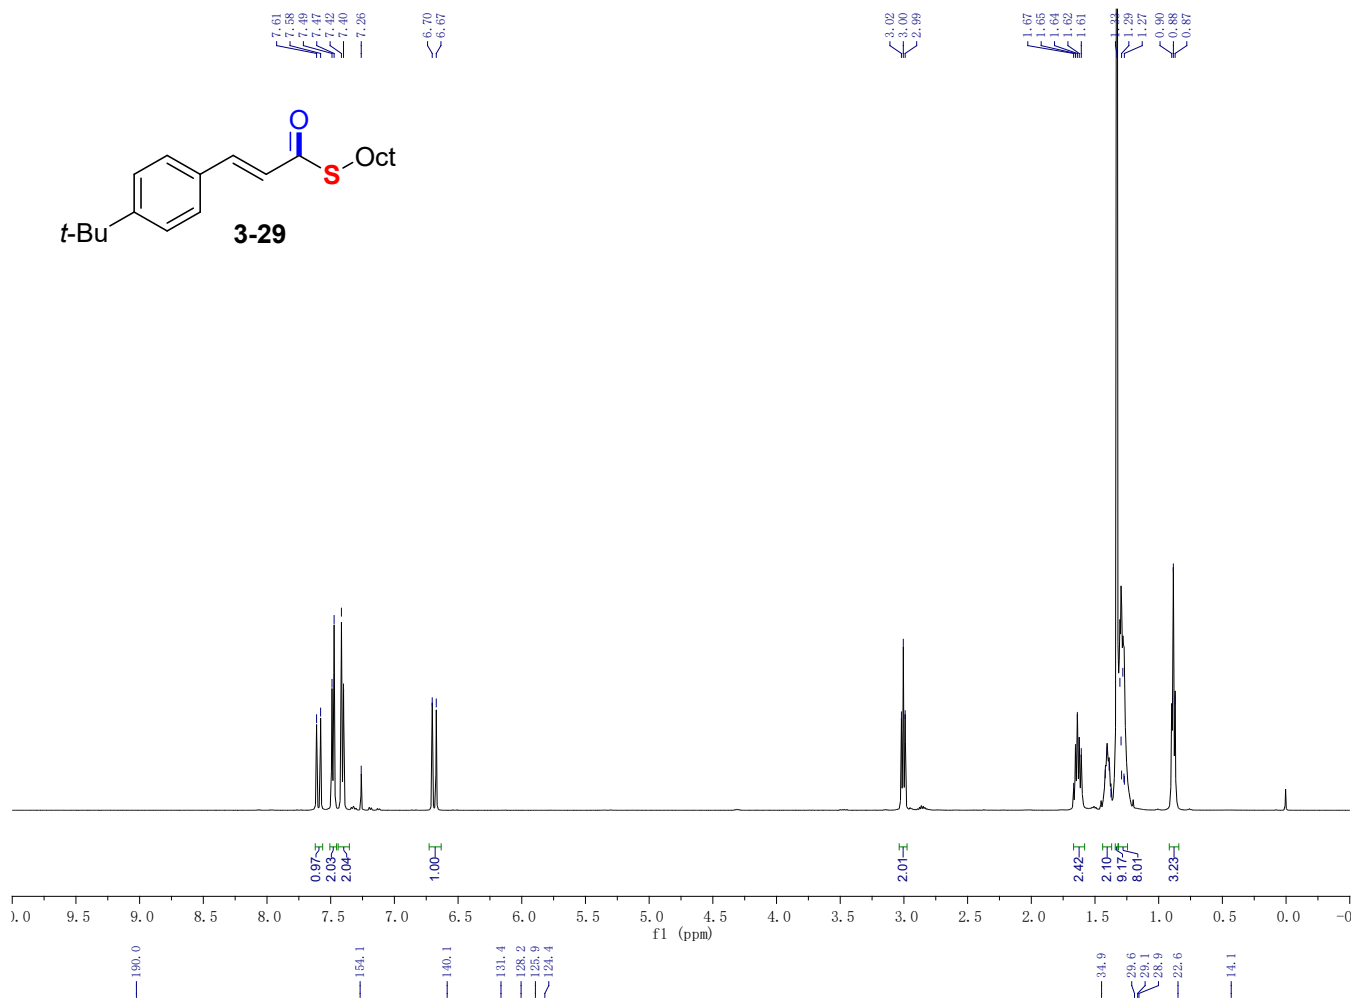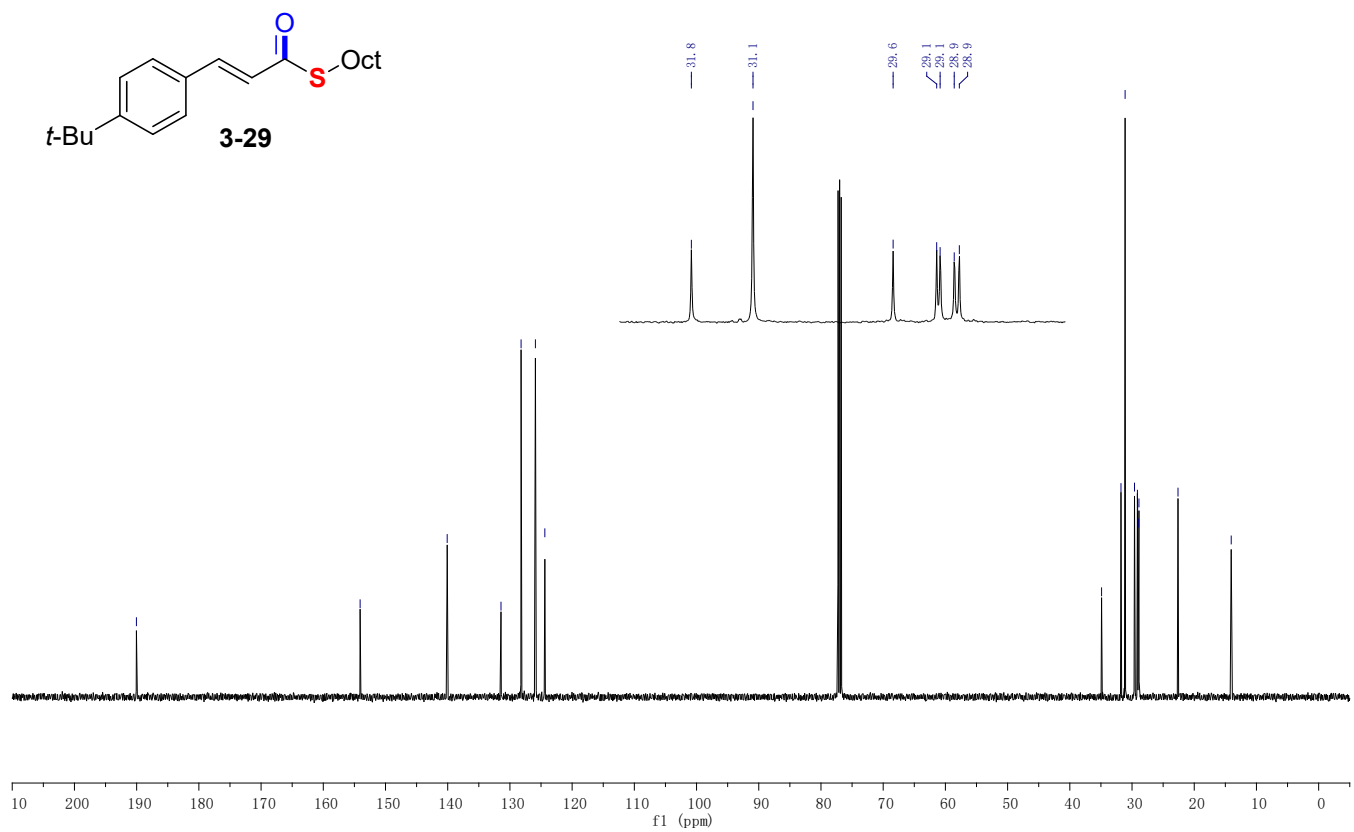

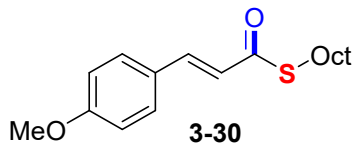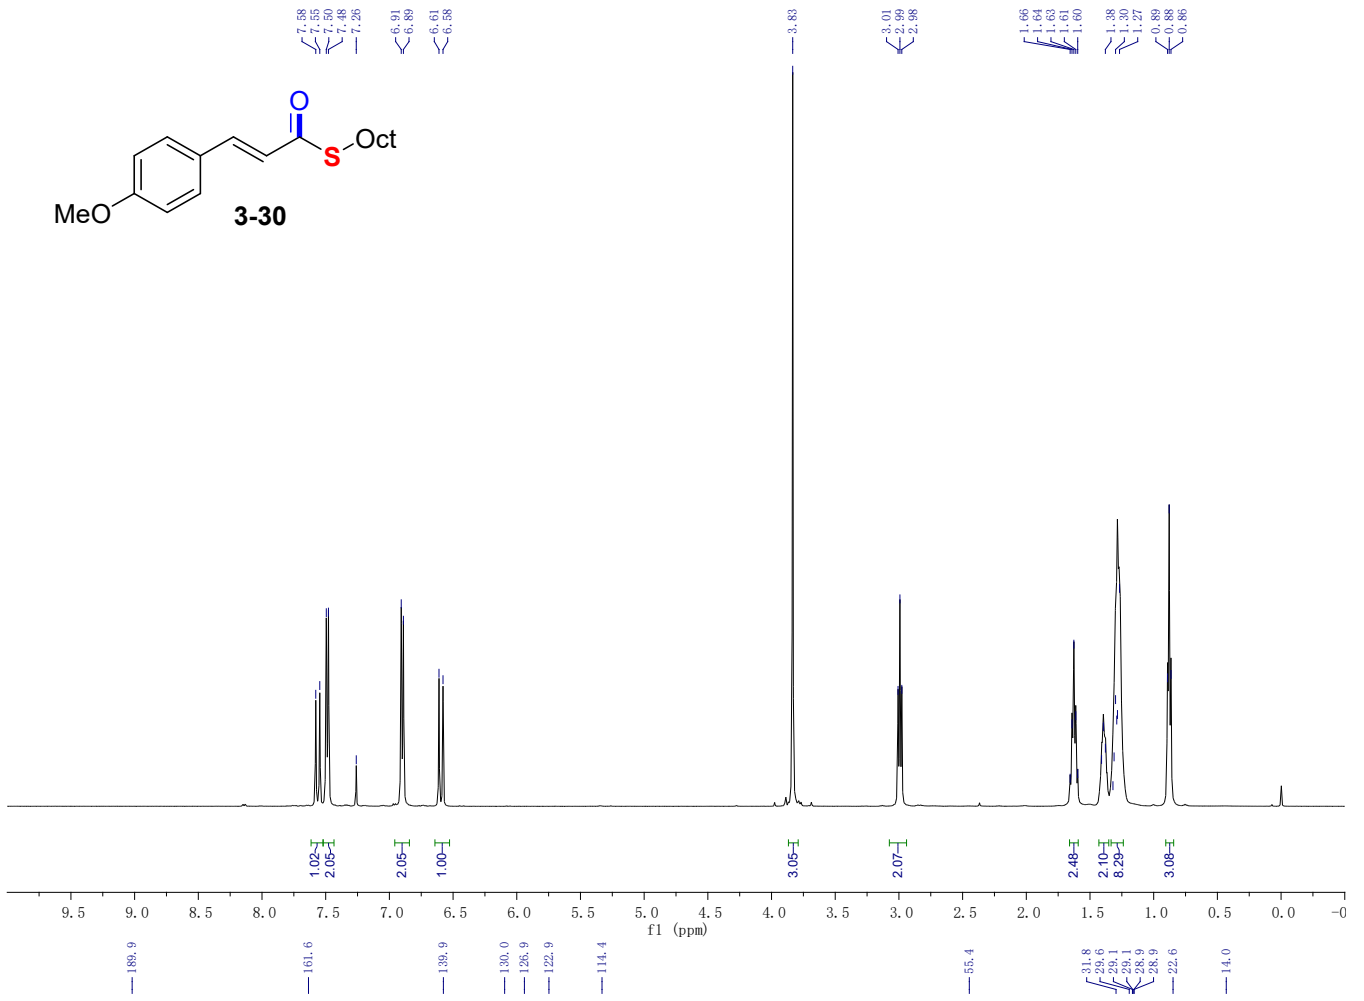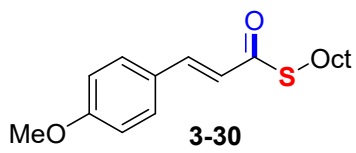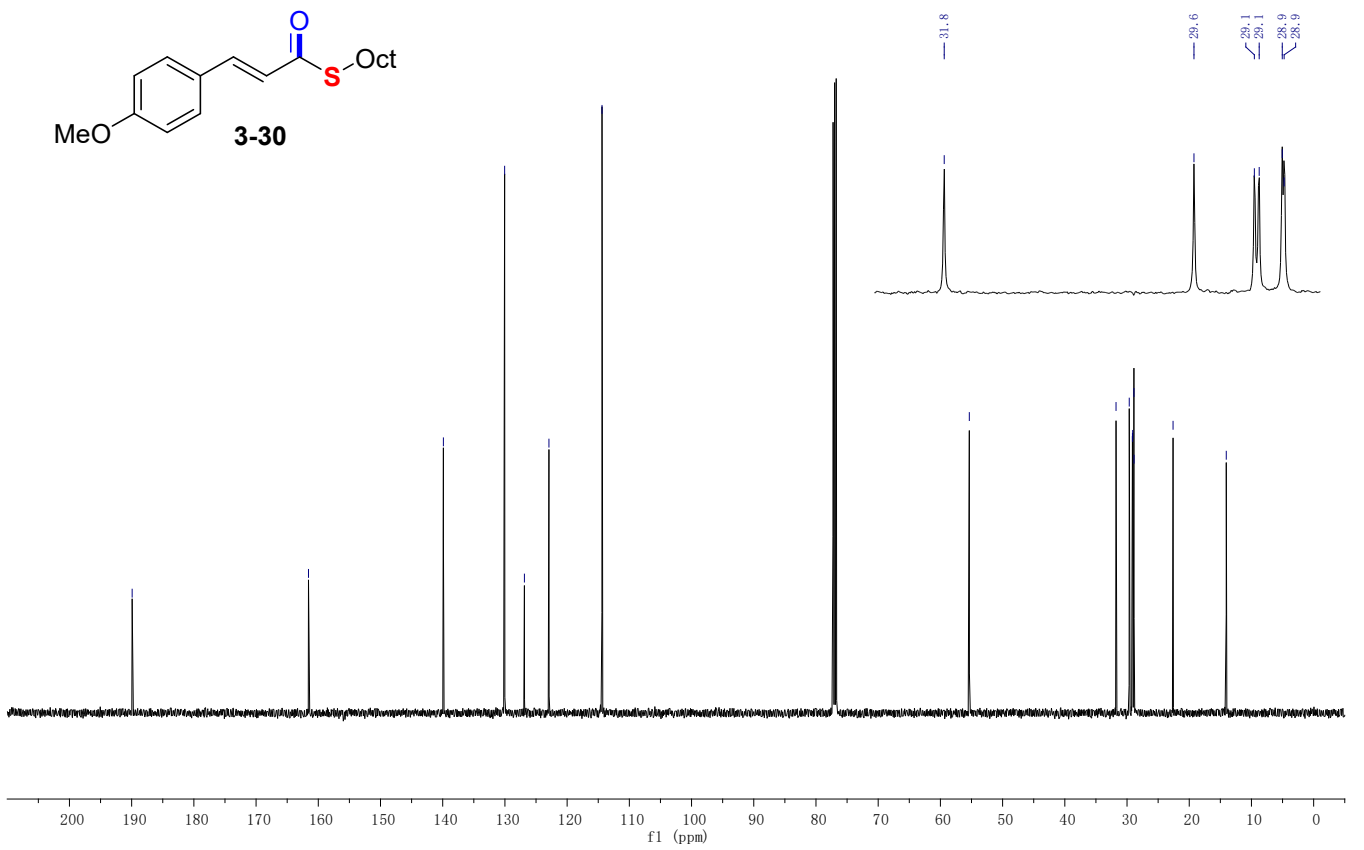

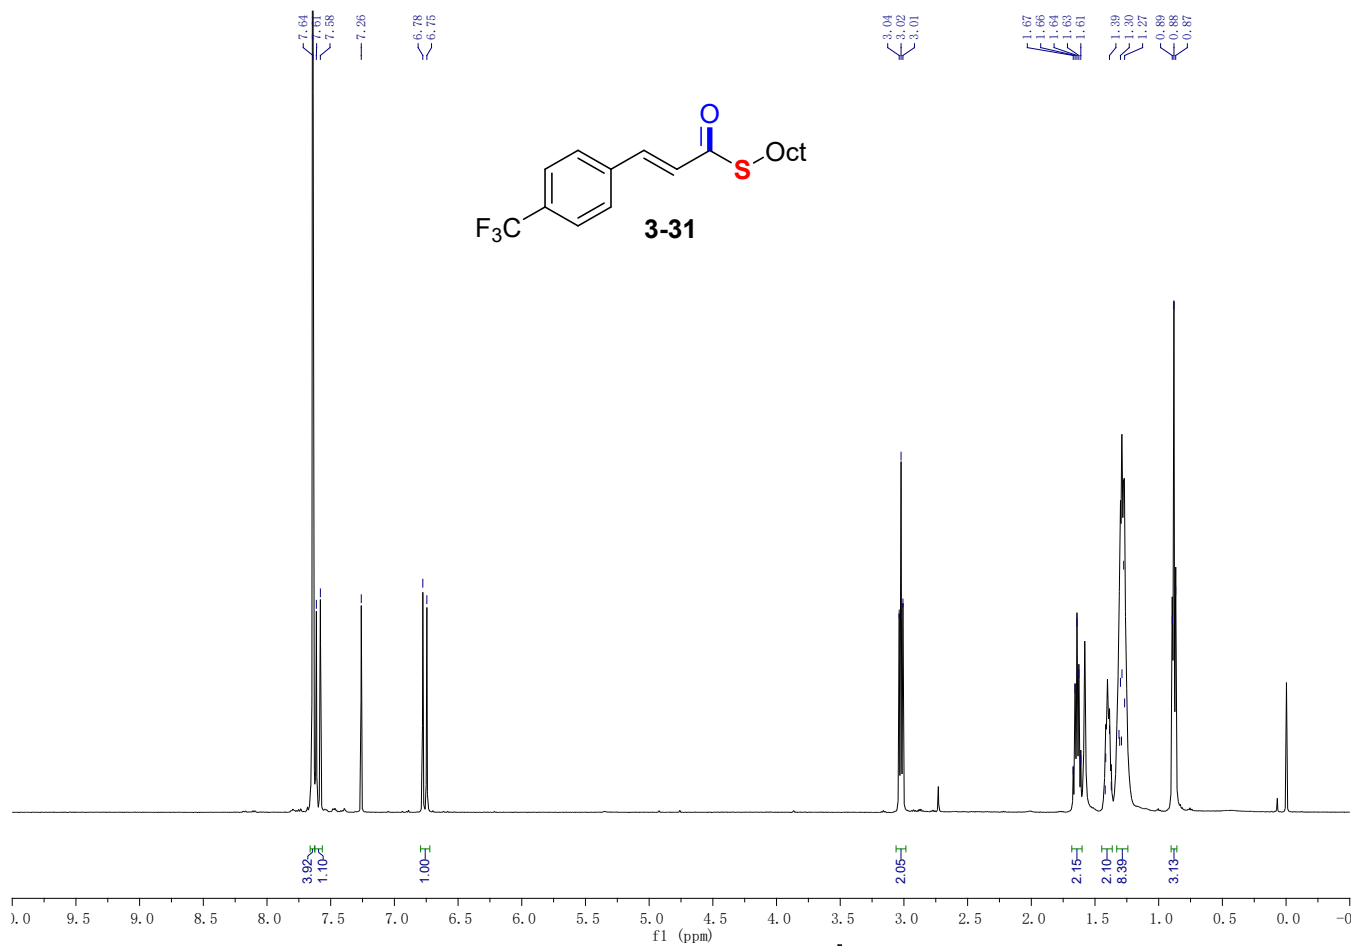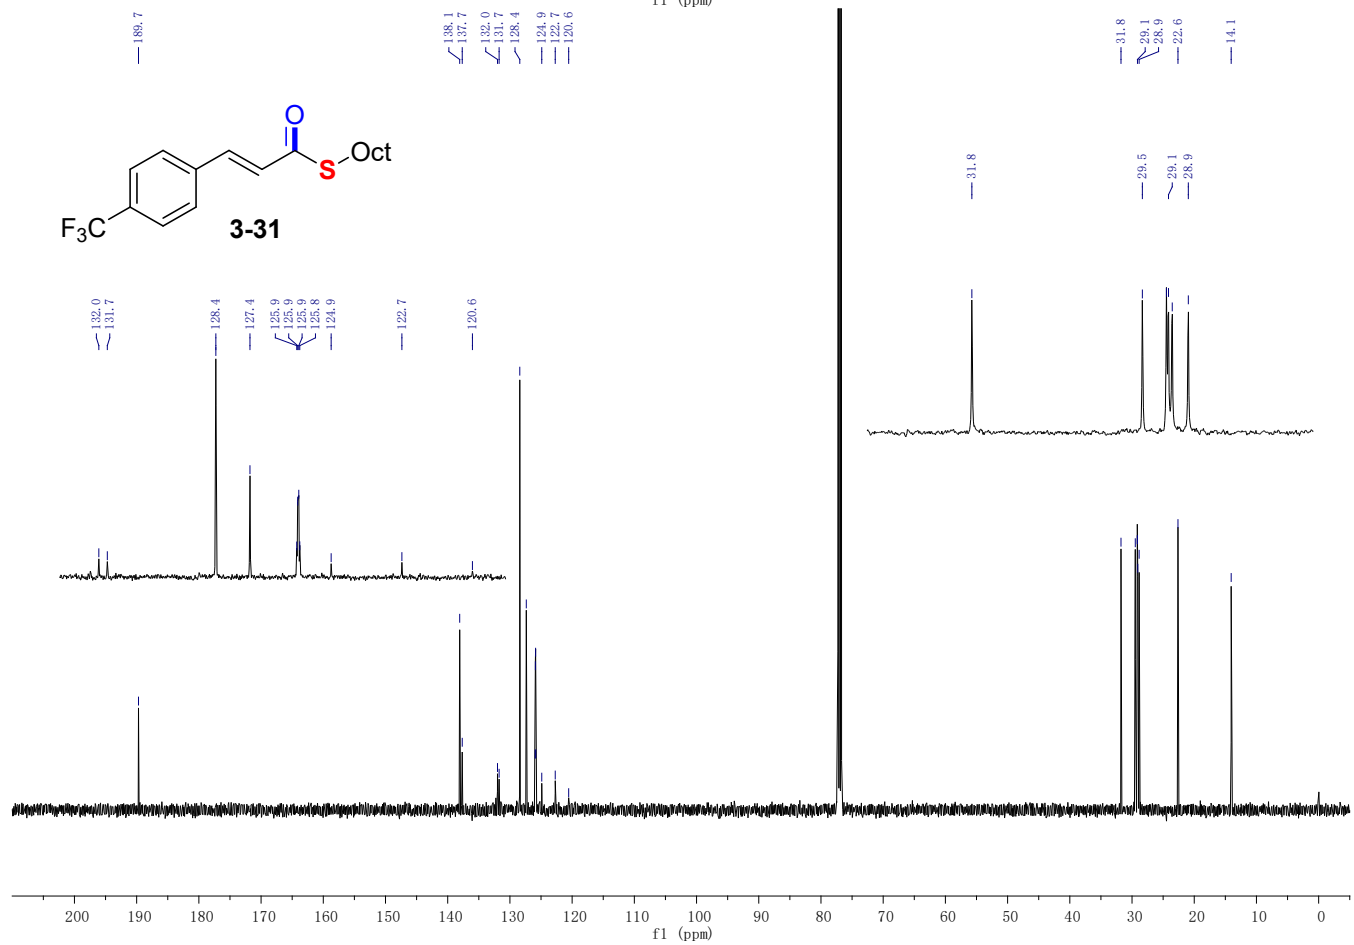

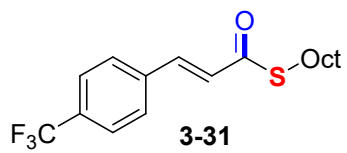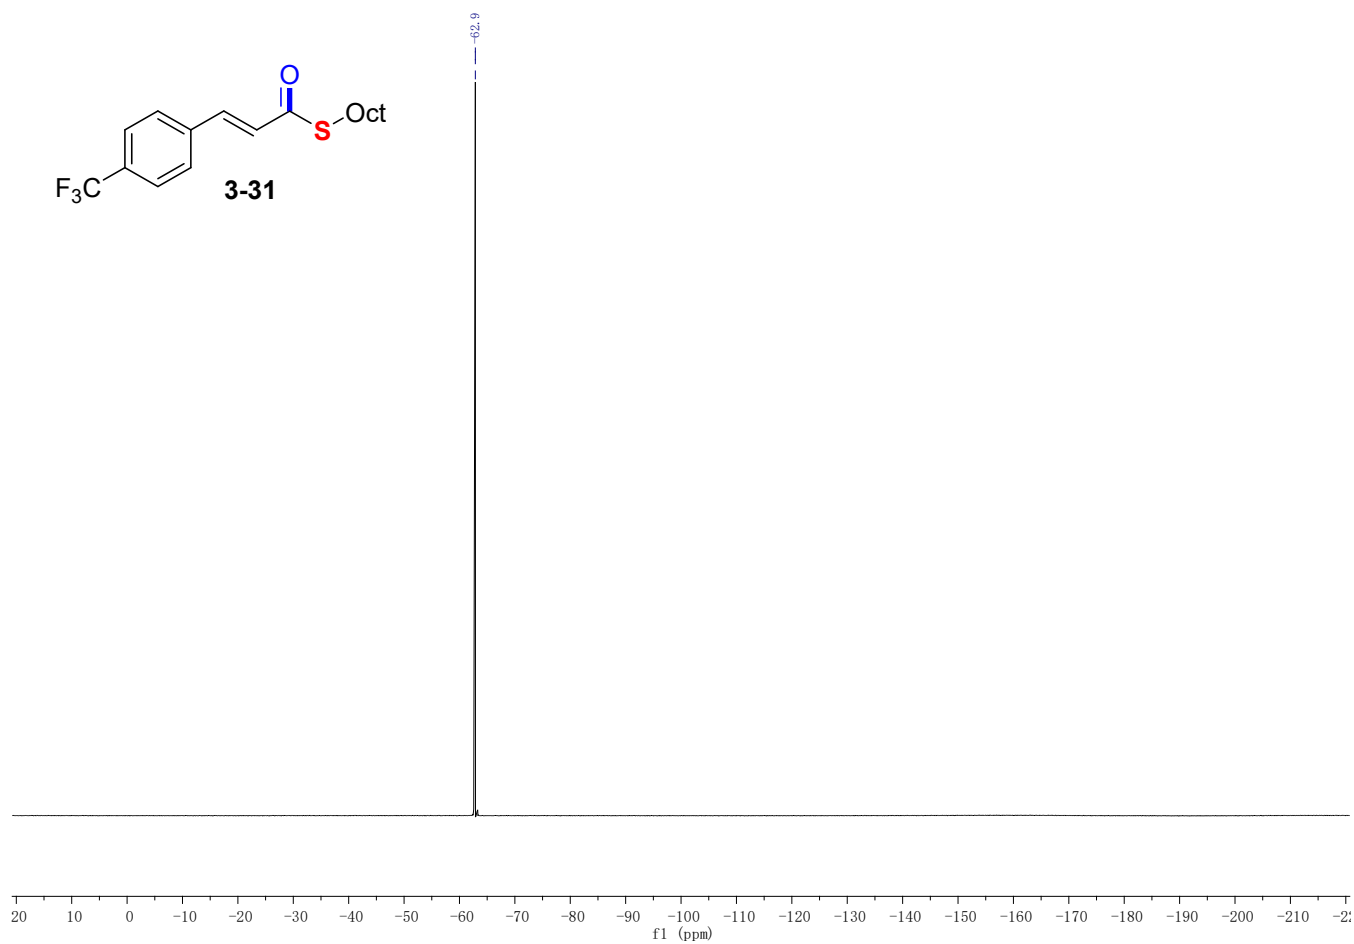

10.02

7.89  
7.88  
7.68  
7.67  
7.58

6.80  
6.77

3.03  
3.01  
3.00

1.66  
1.65  
1.63  
1.62  
1.60  
1.39  
1.28  
1.26  
0.88  
0.87  
0.85

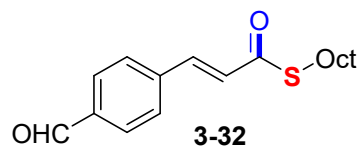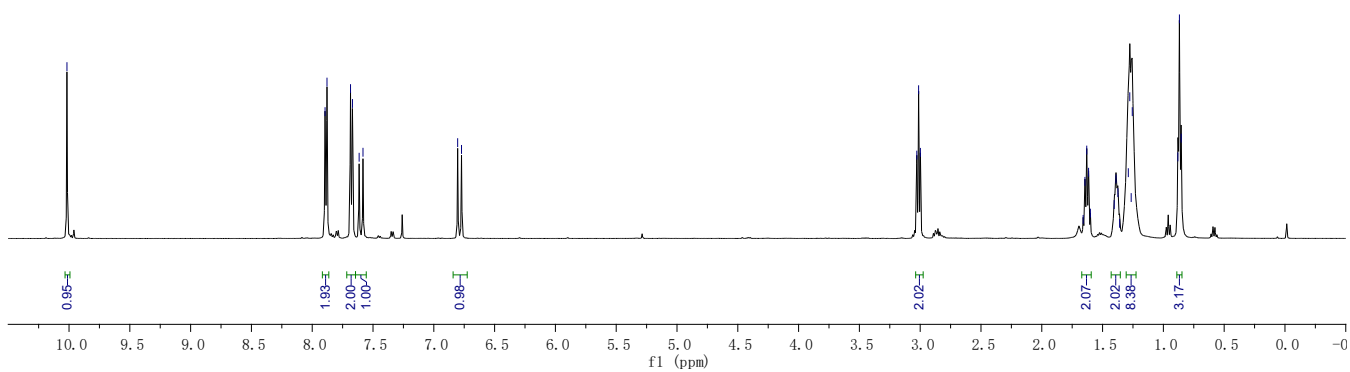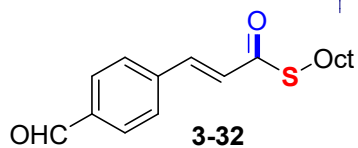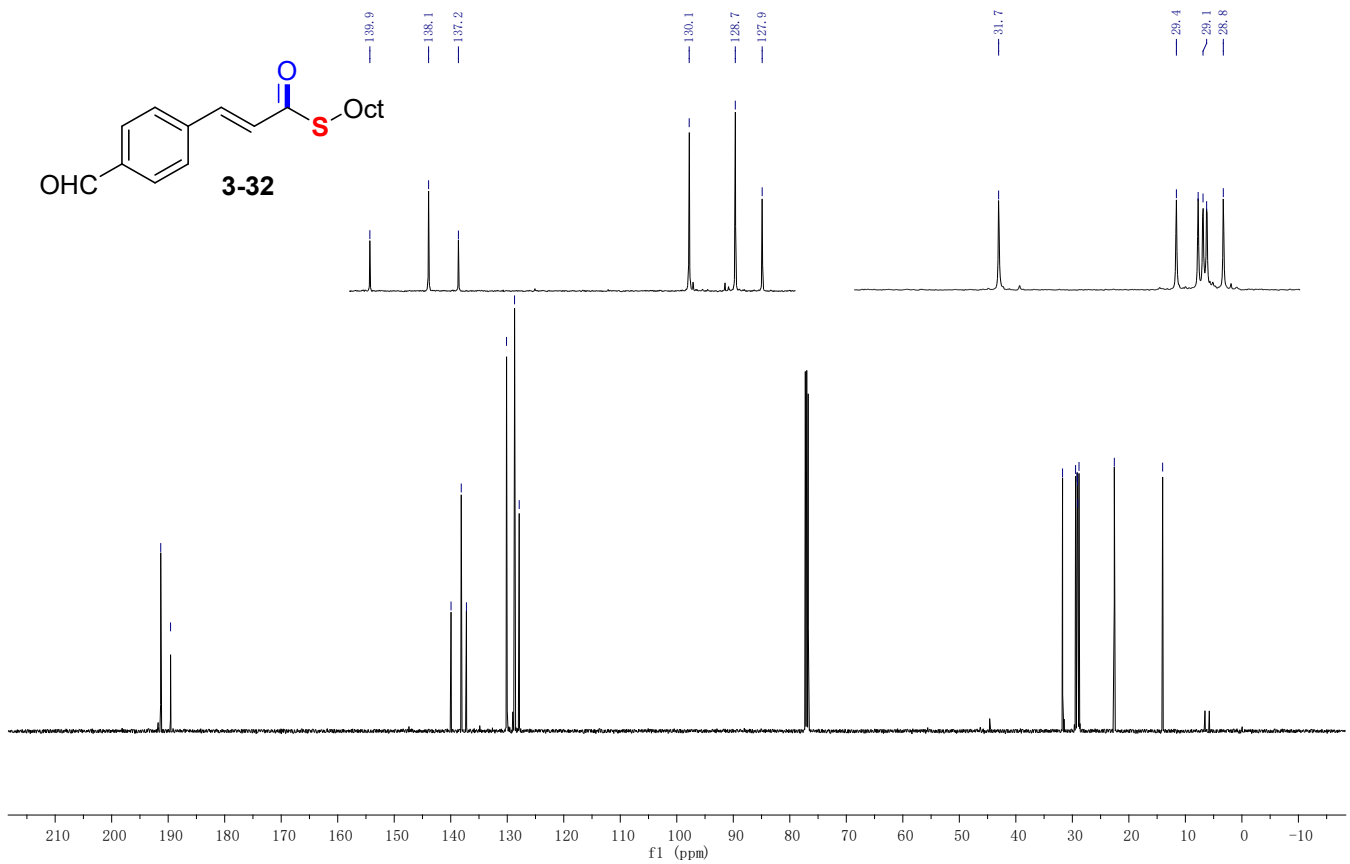



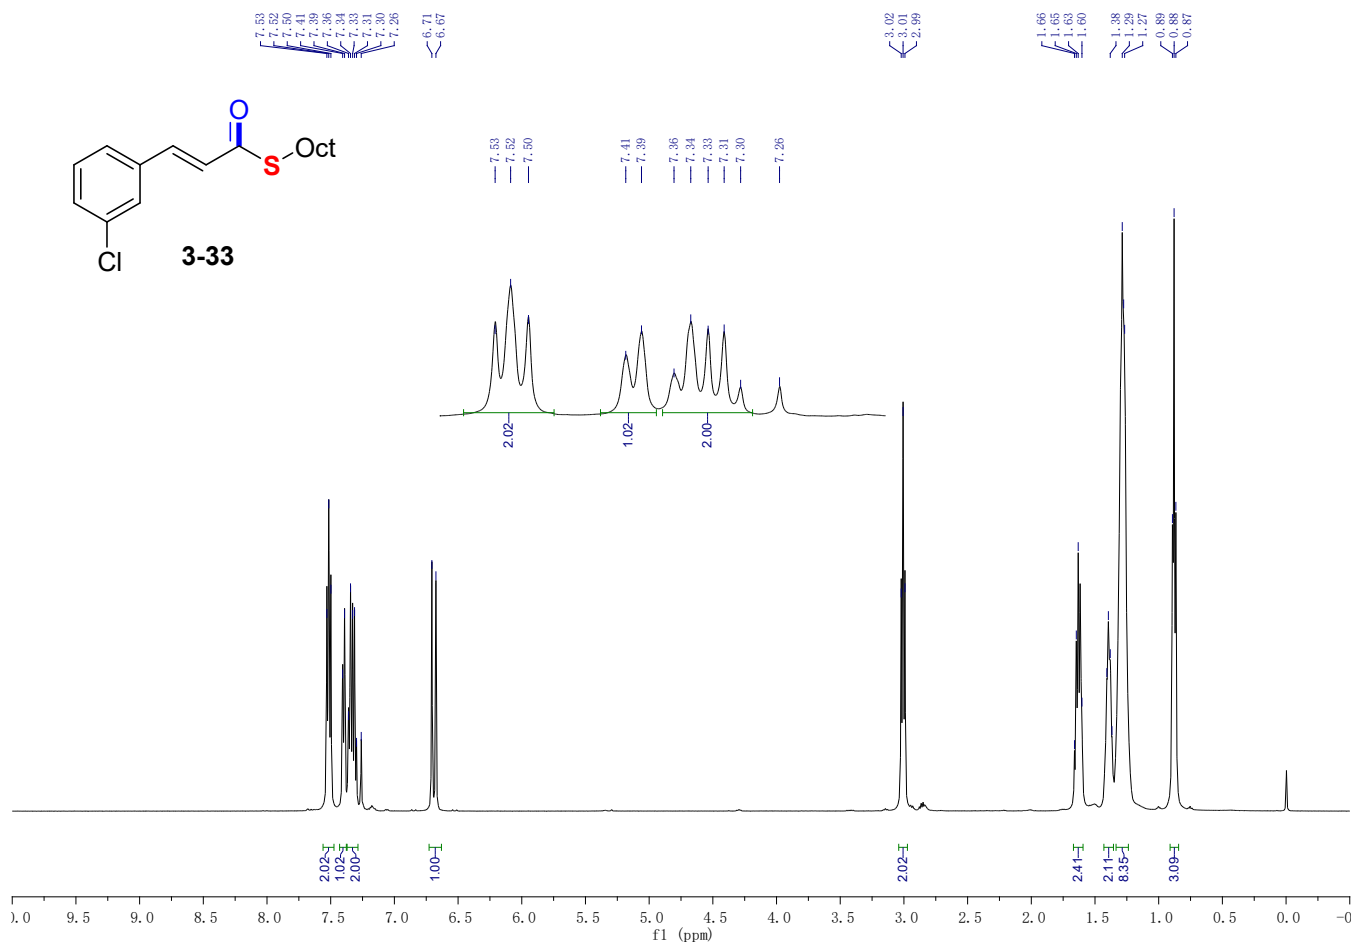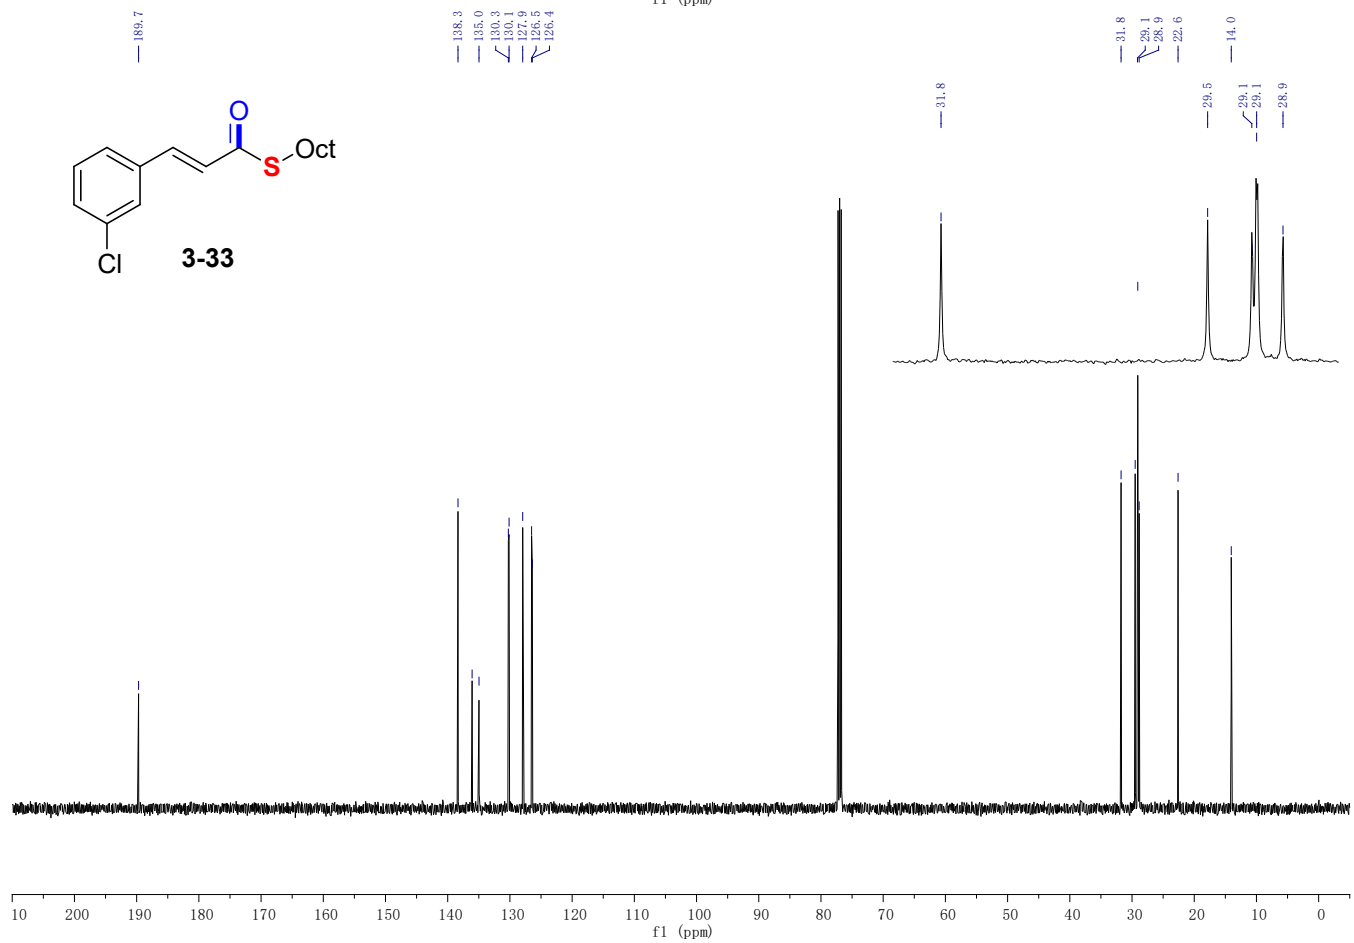

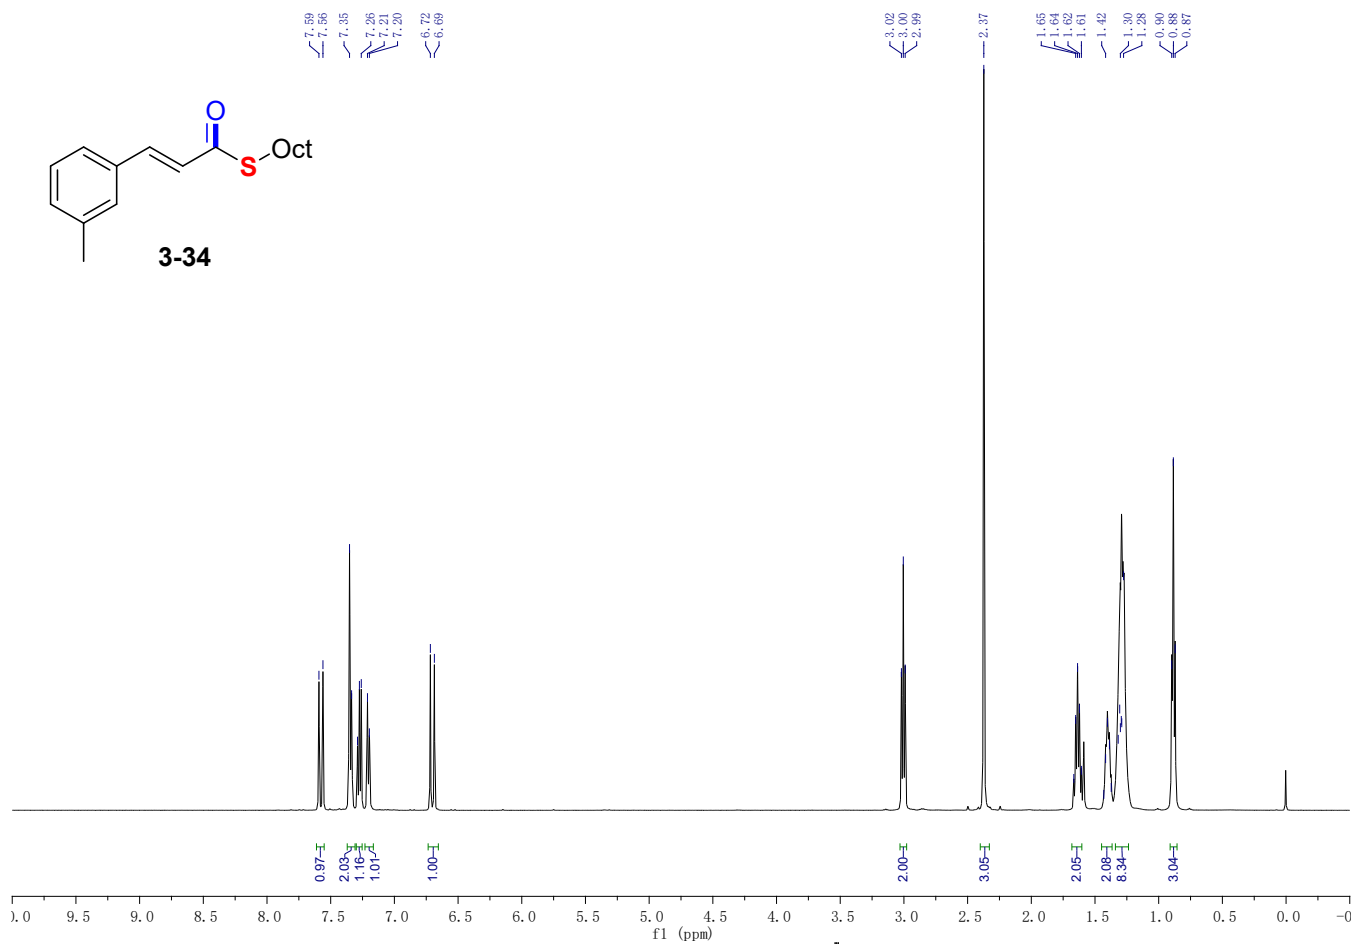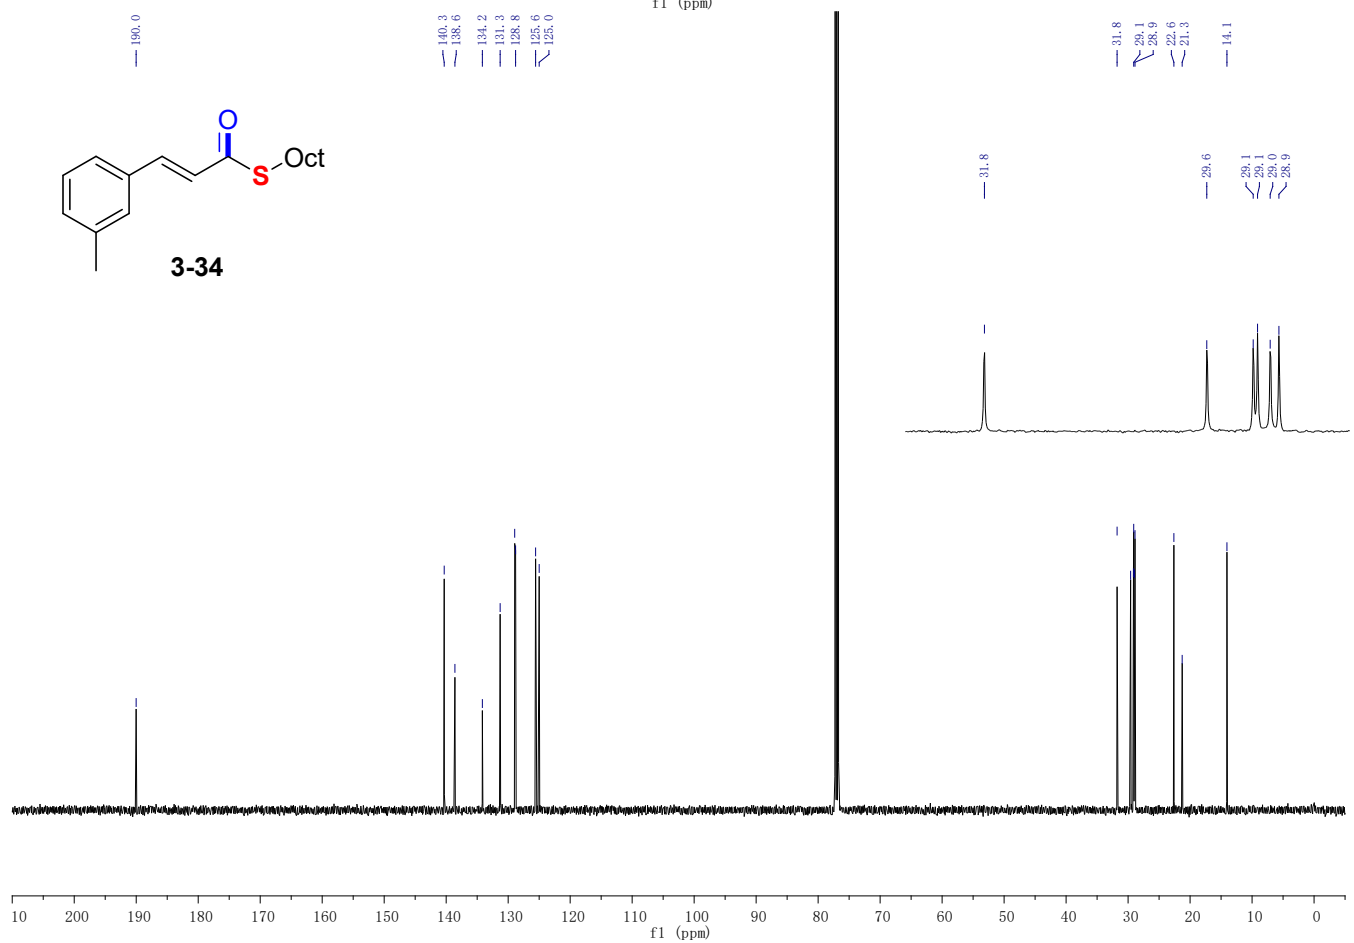

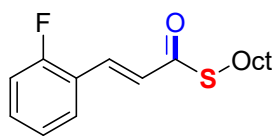

3-35

7.74  
7.71  
7.53  
7.36  
7.34  
7.15  
7.08  
6.92  
6.79

3.03  
3.01  
3.00

1.67  
1.65  
1.64  
1.62  
1.61

1.37  
1.30  
1.27  
0.89  
0.87

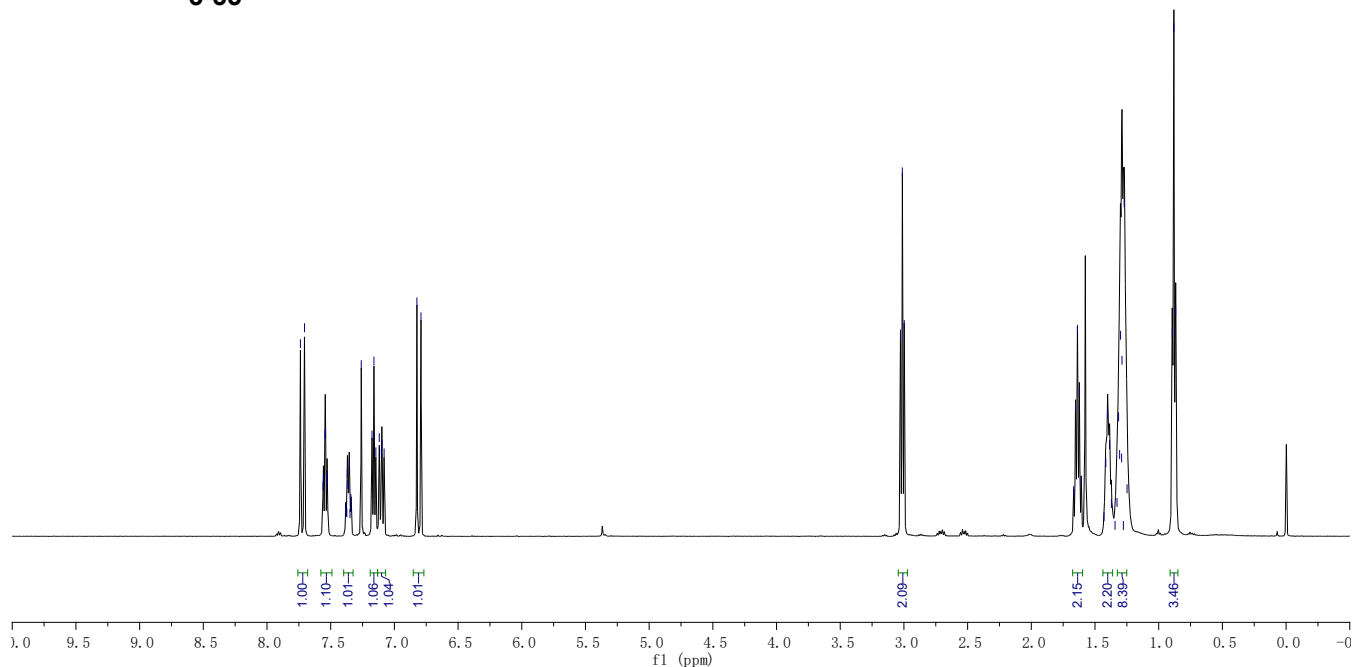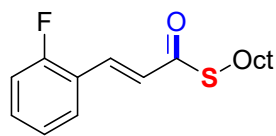

3-35

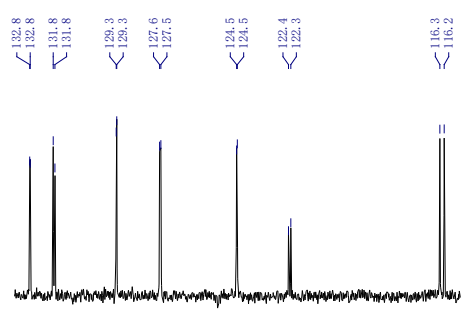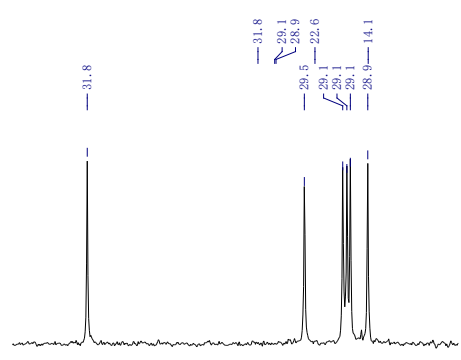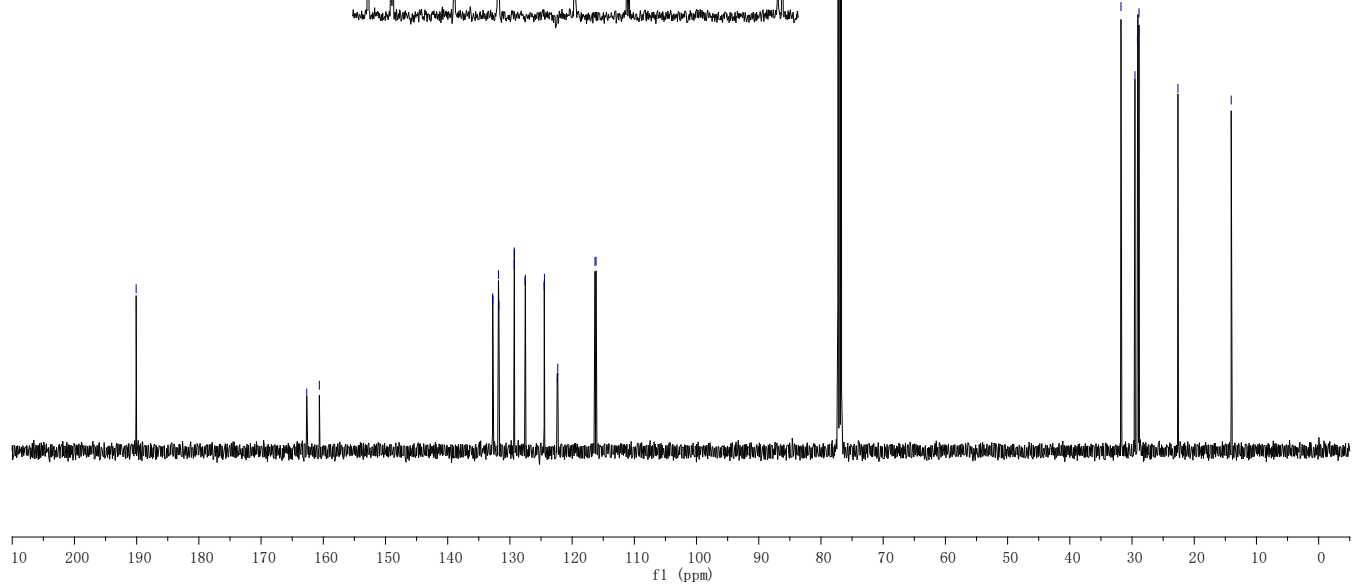

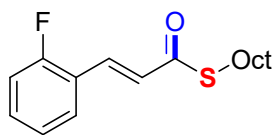

3-35

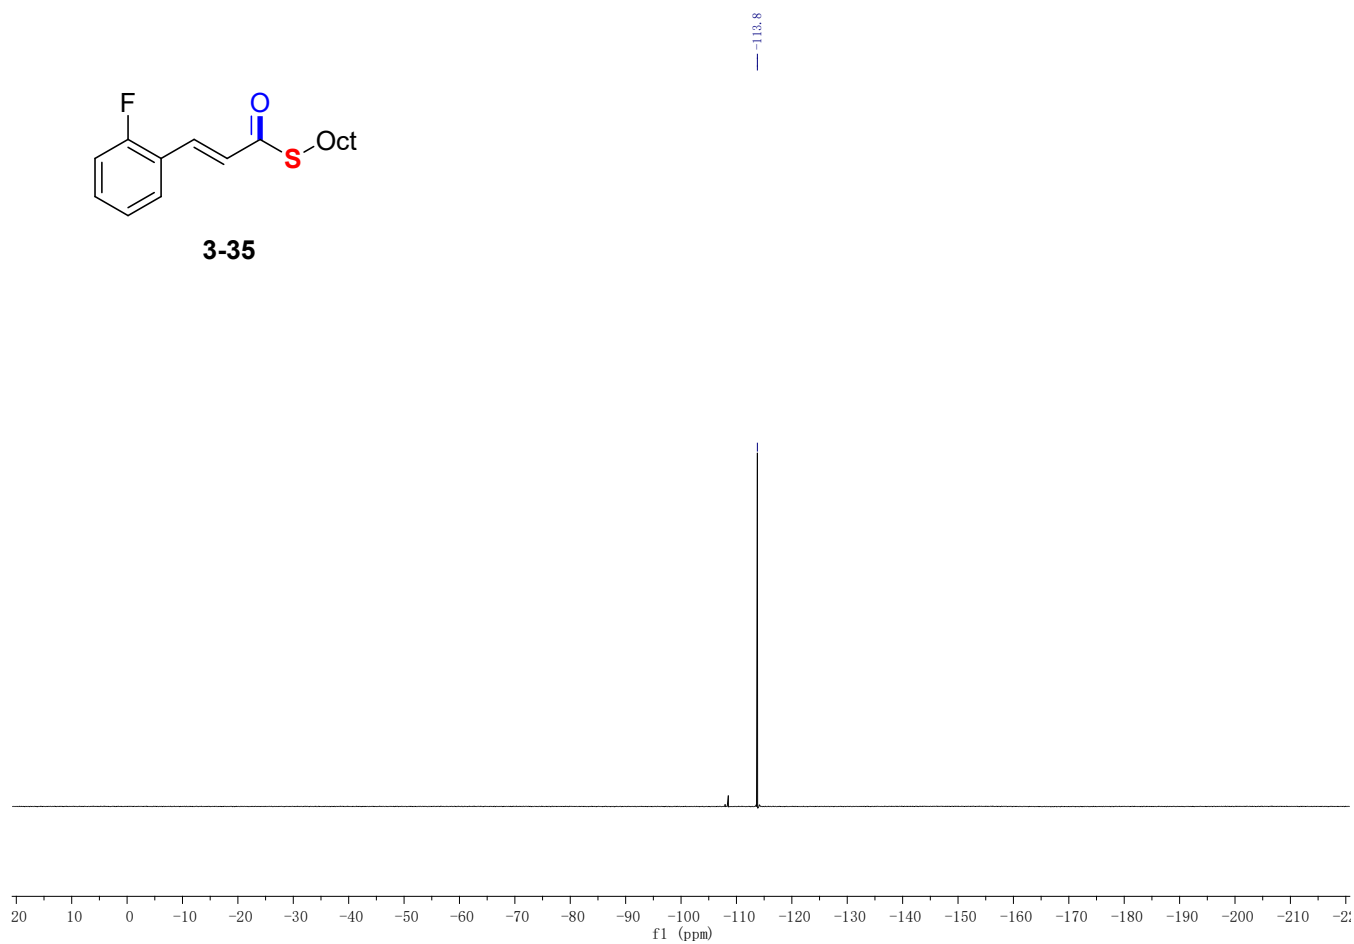

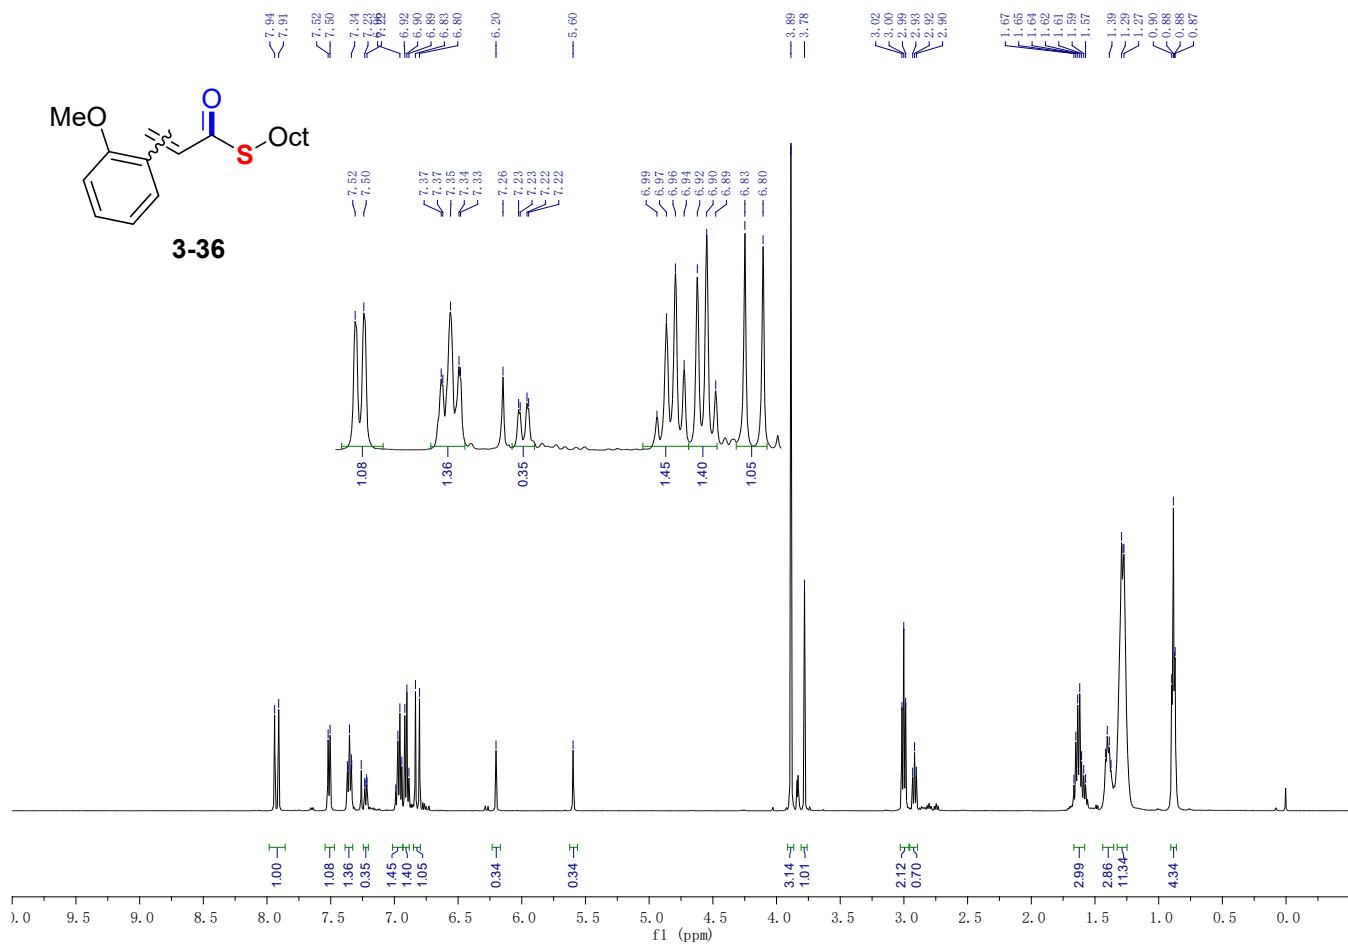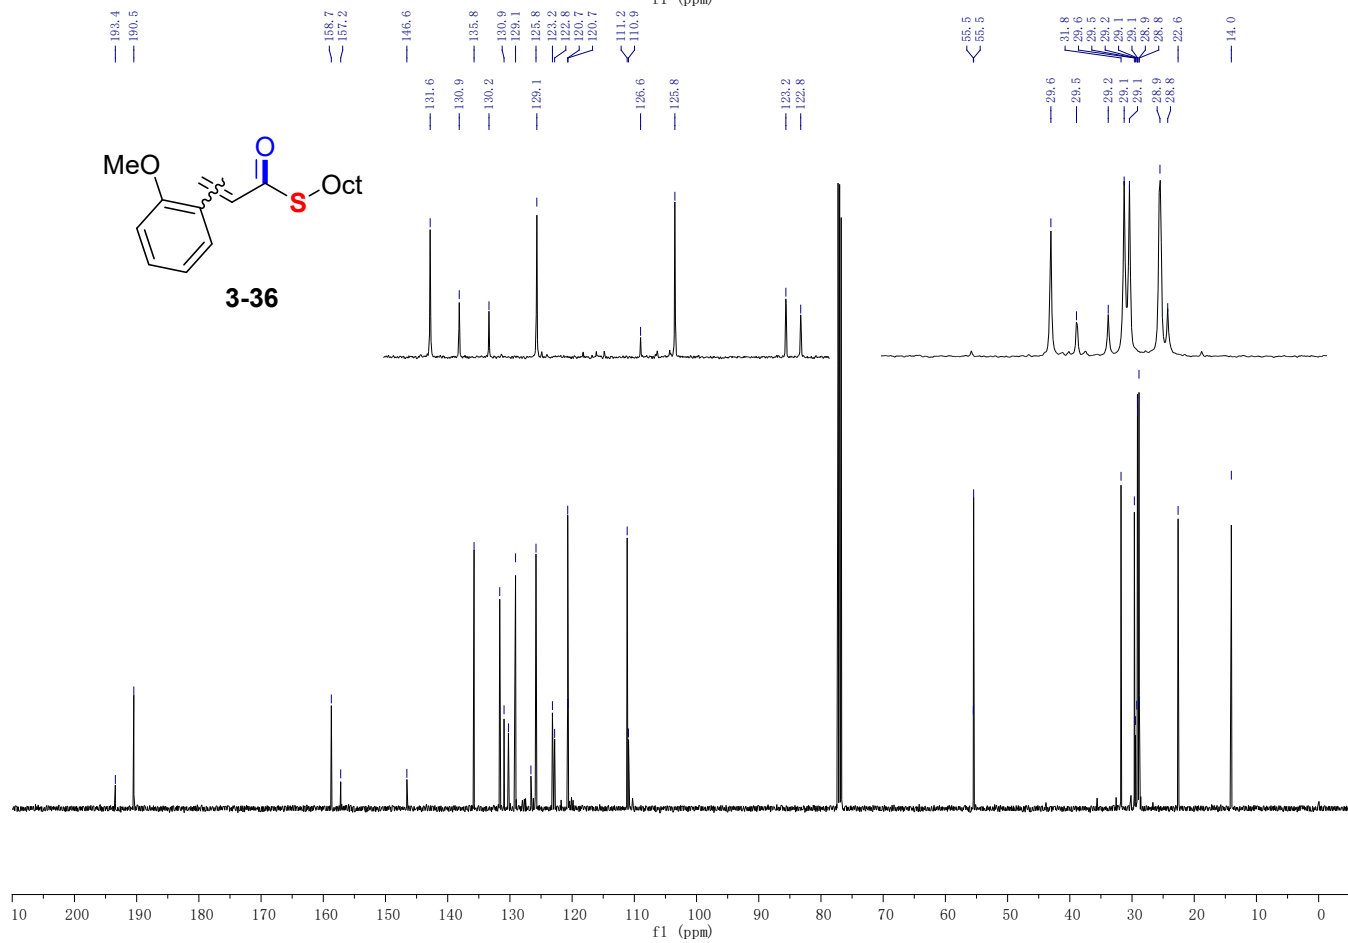

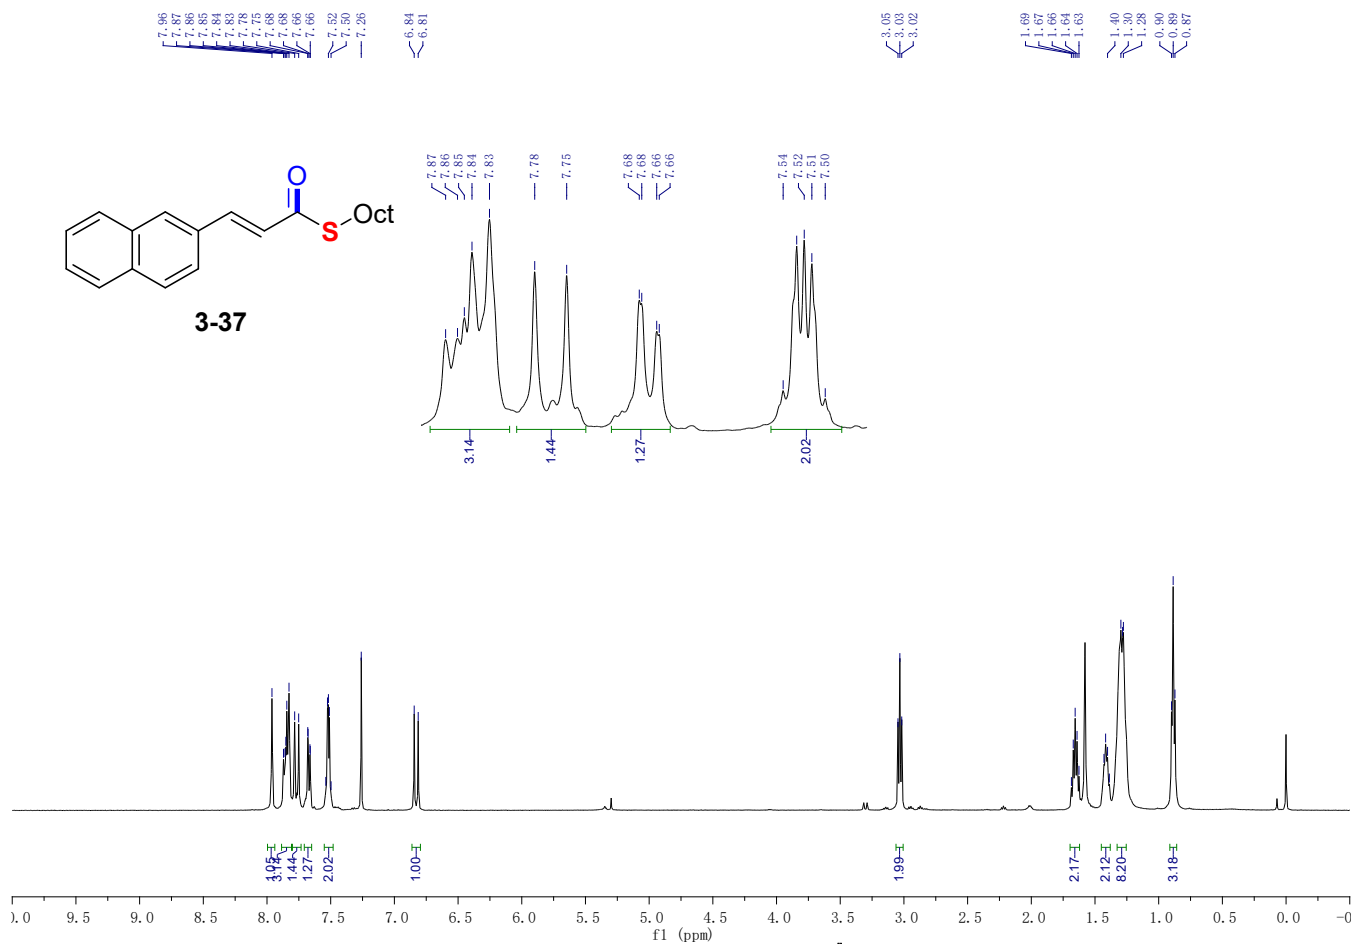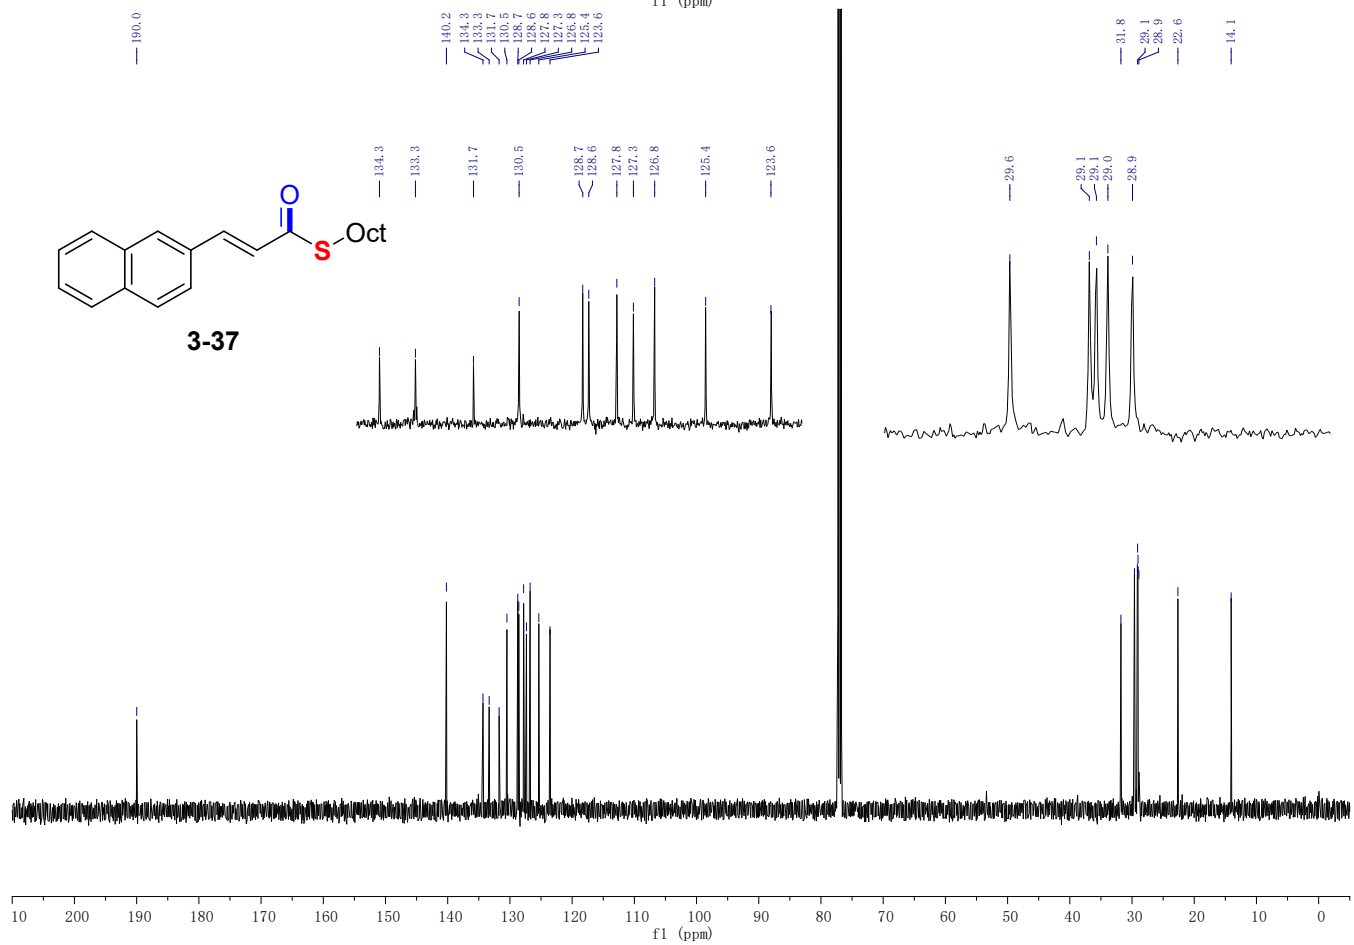

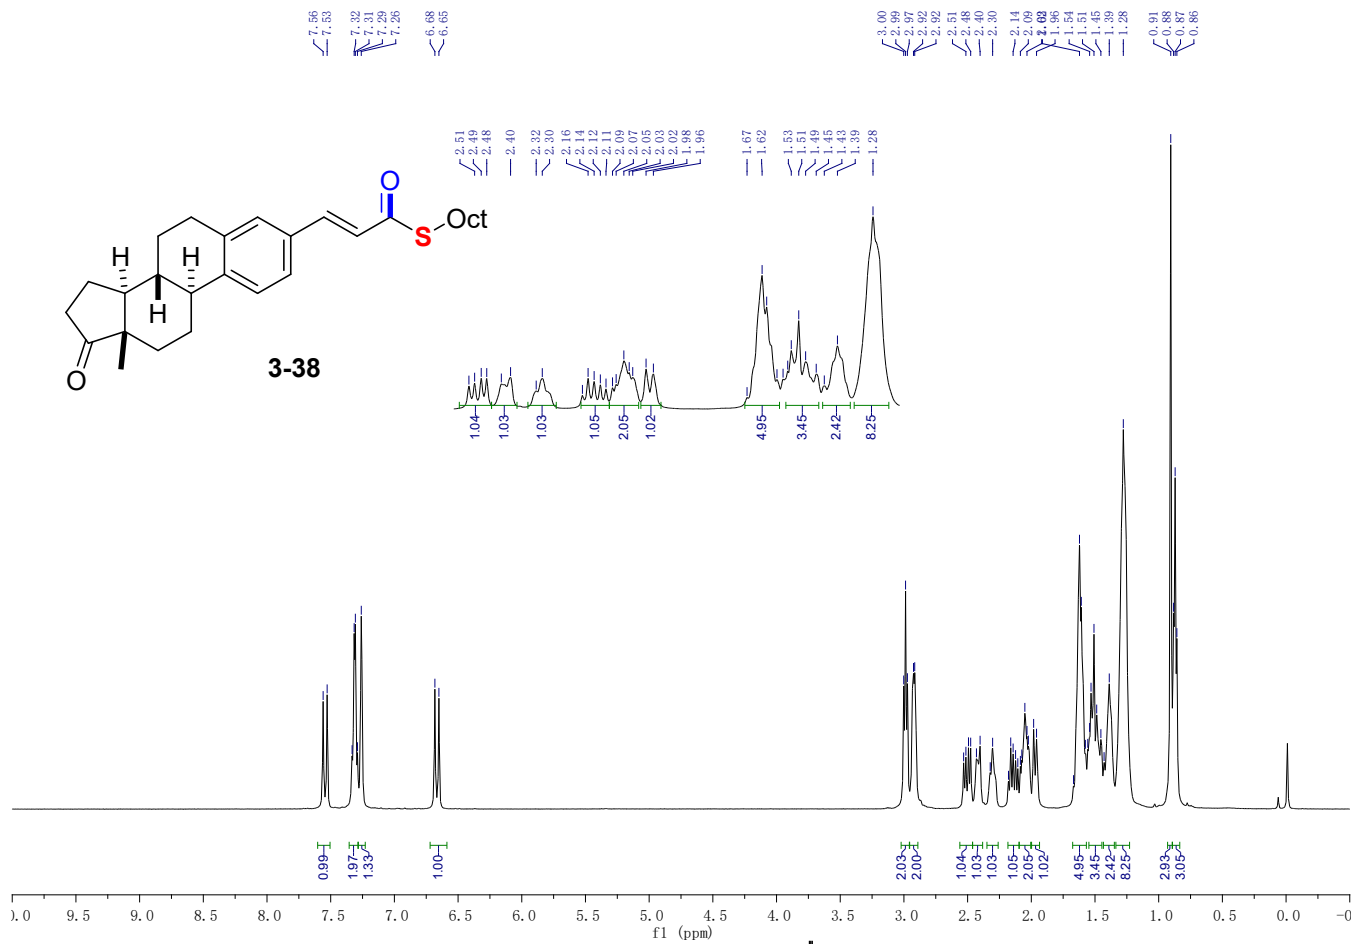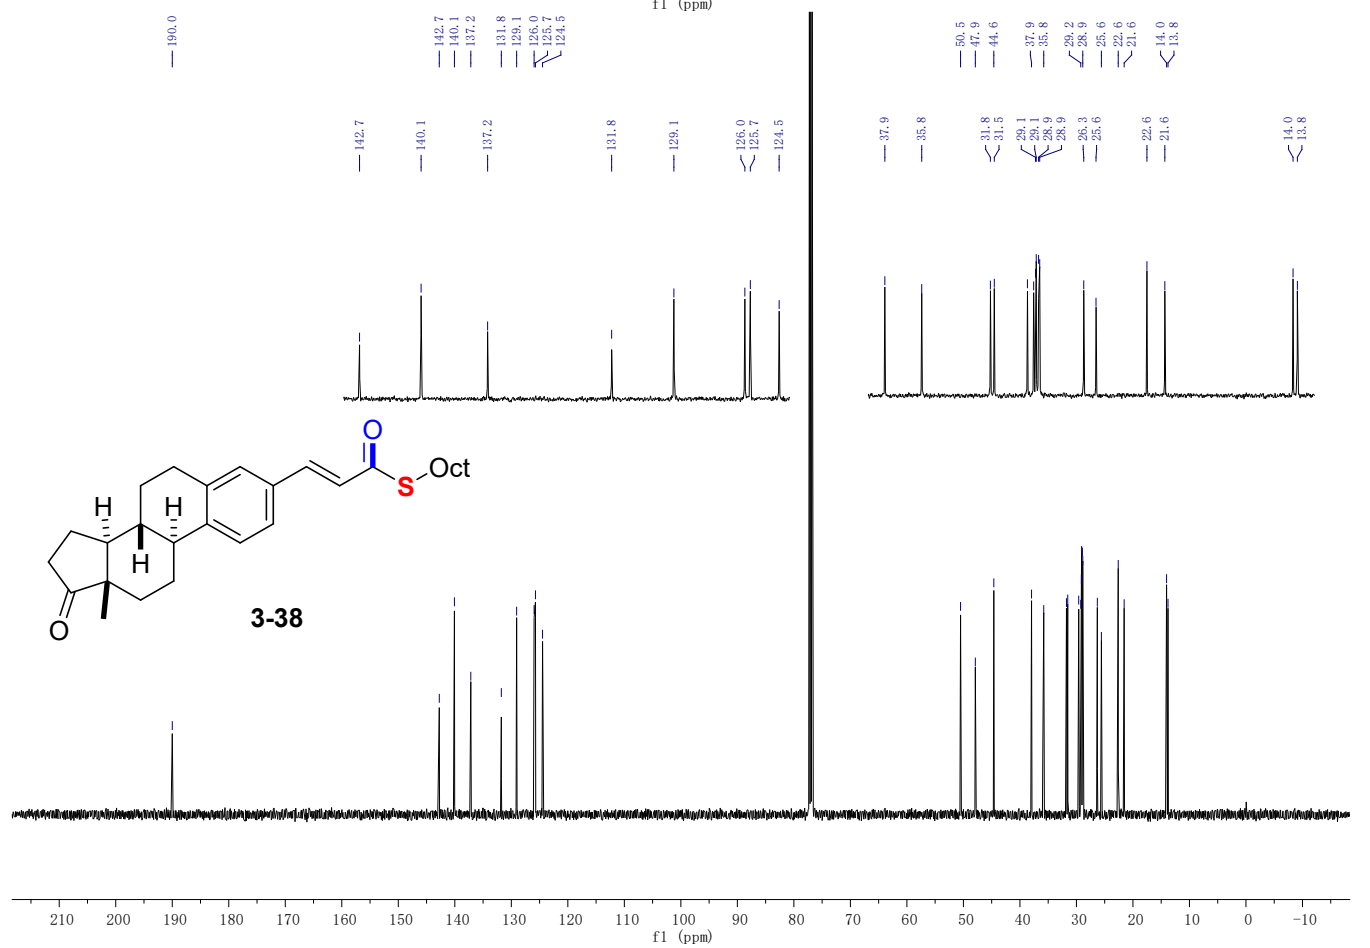

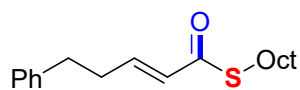

3-39

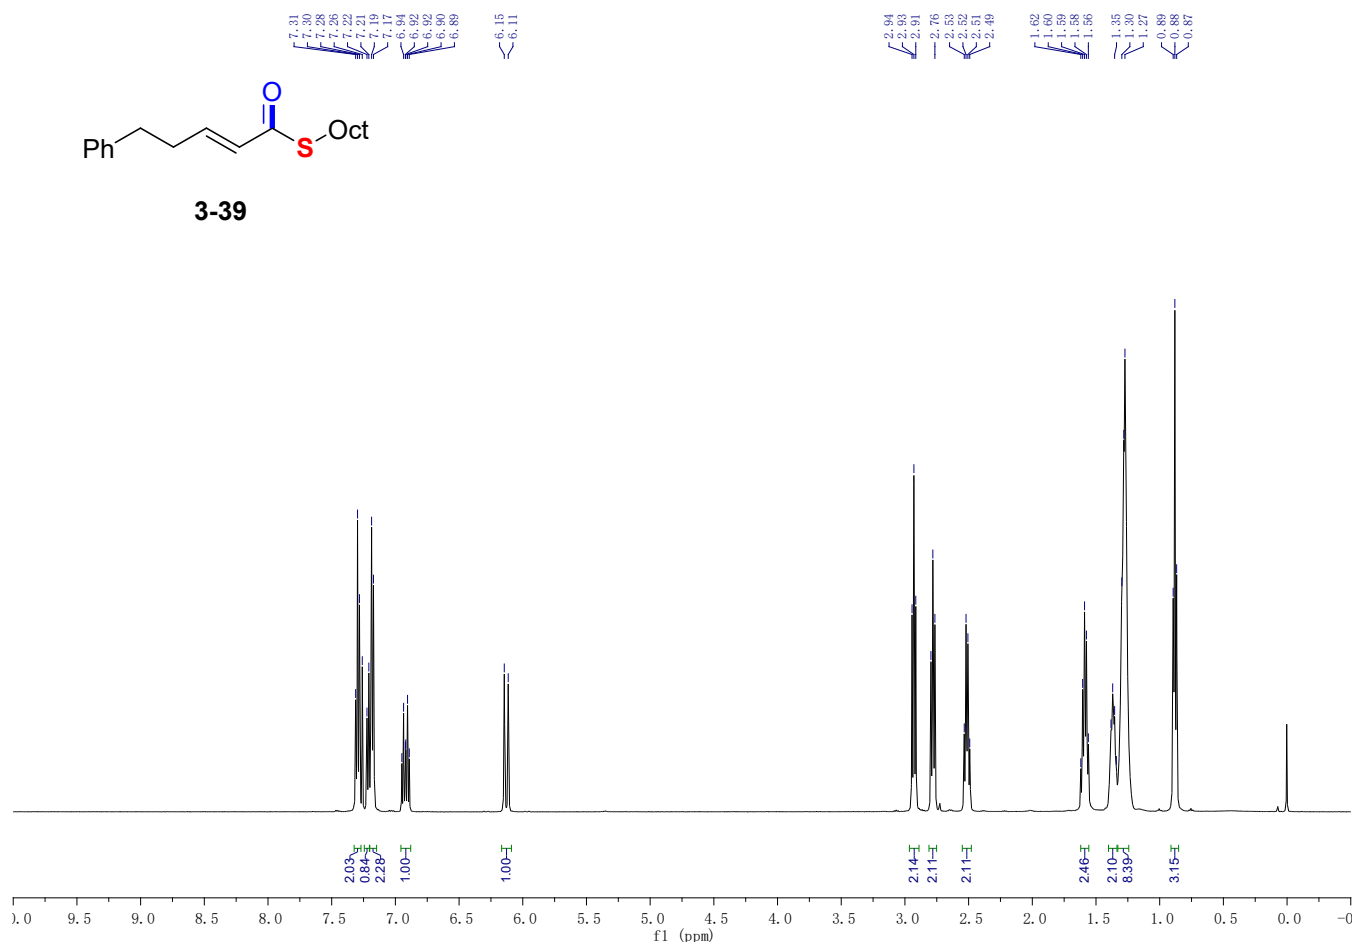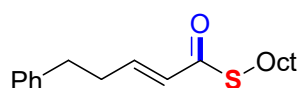

3-39

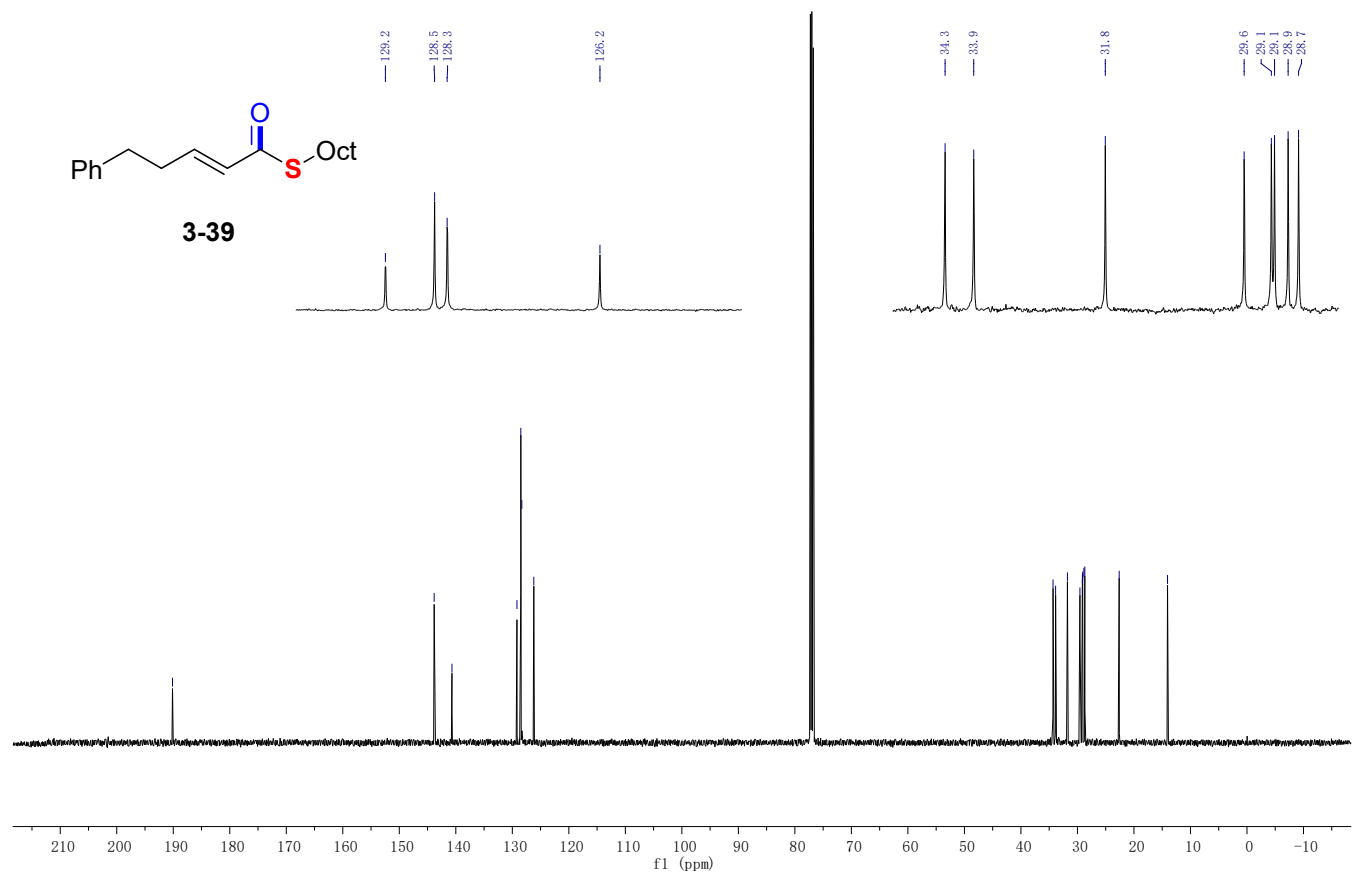



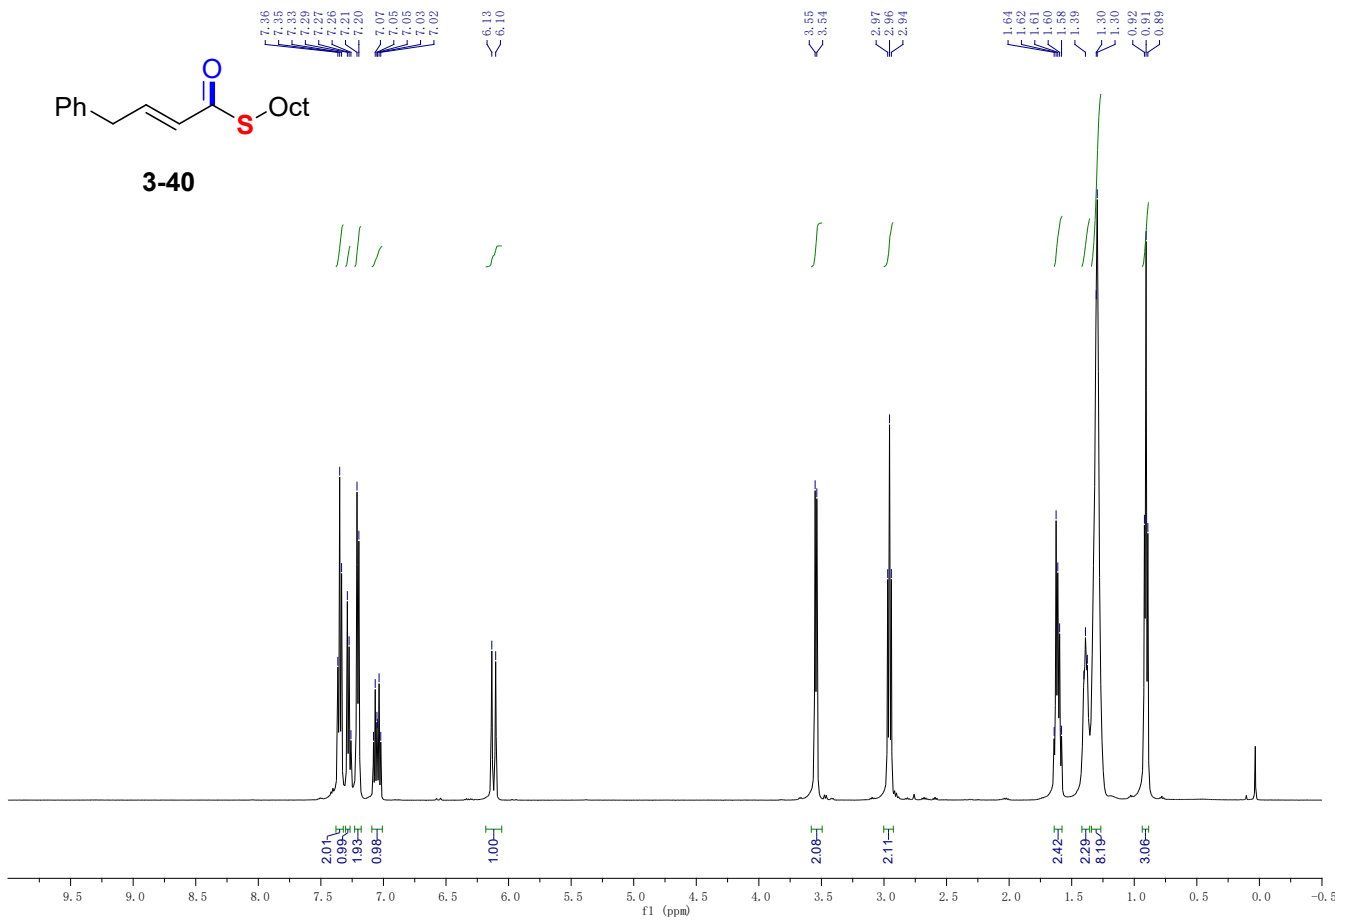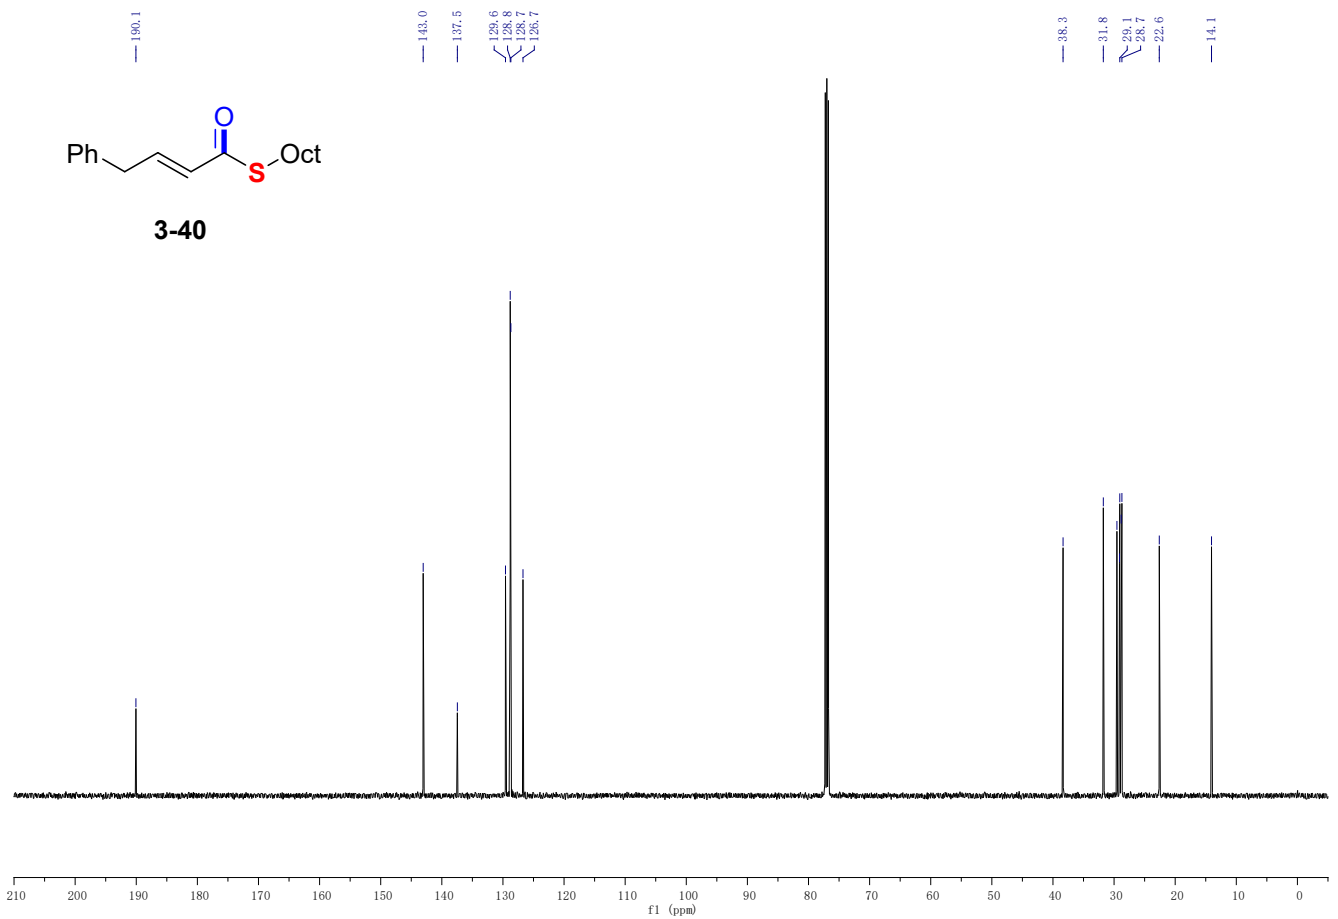

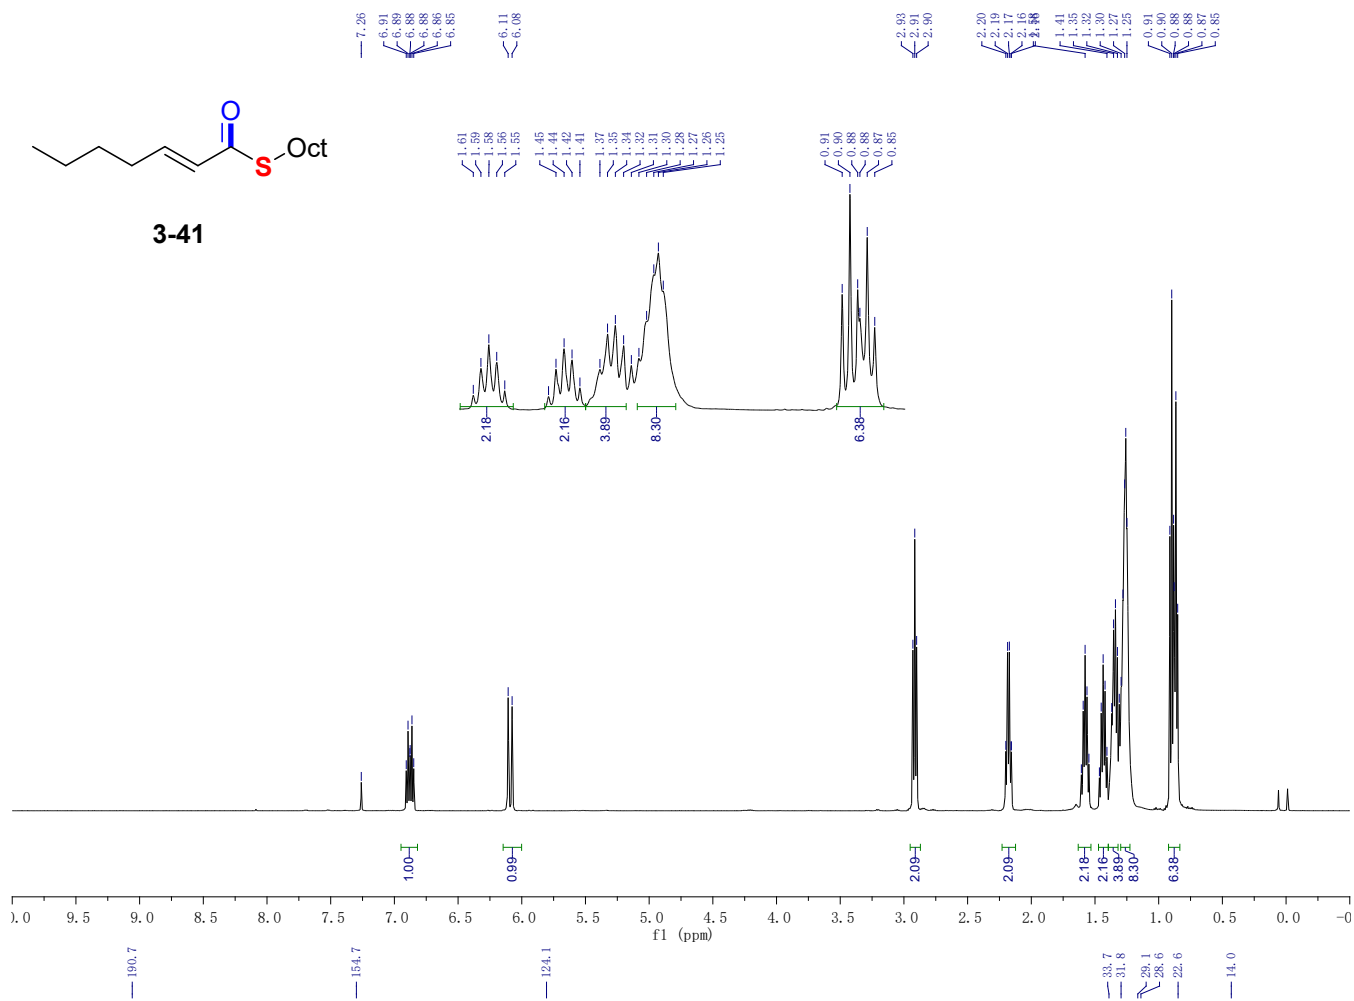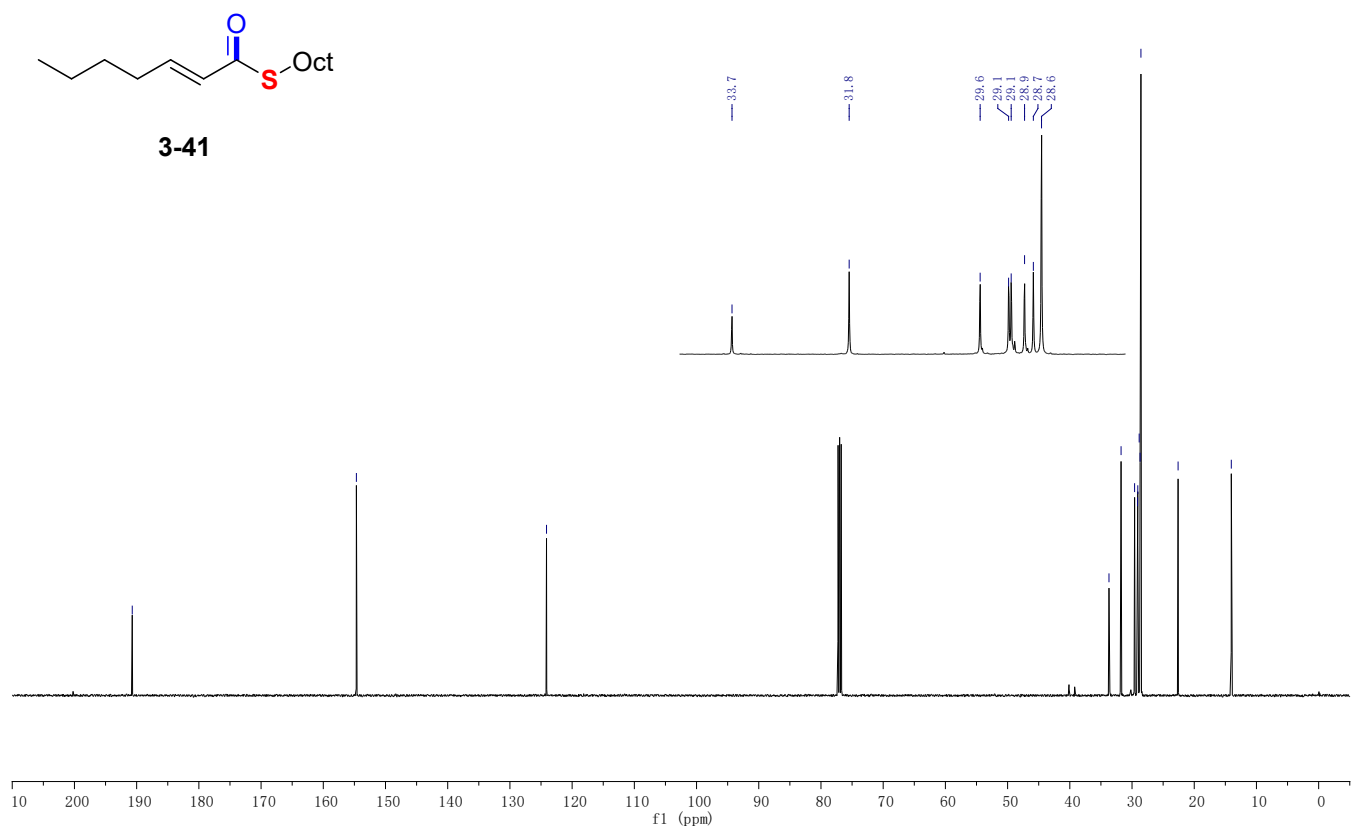

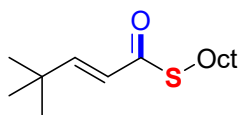

3-42

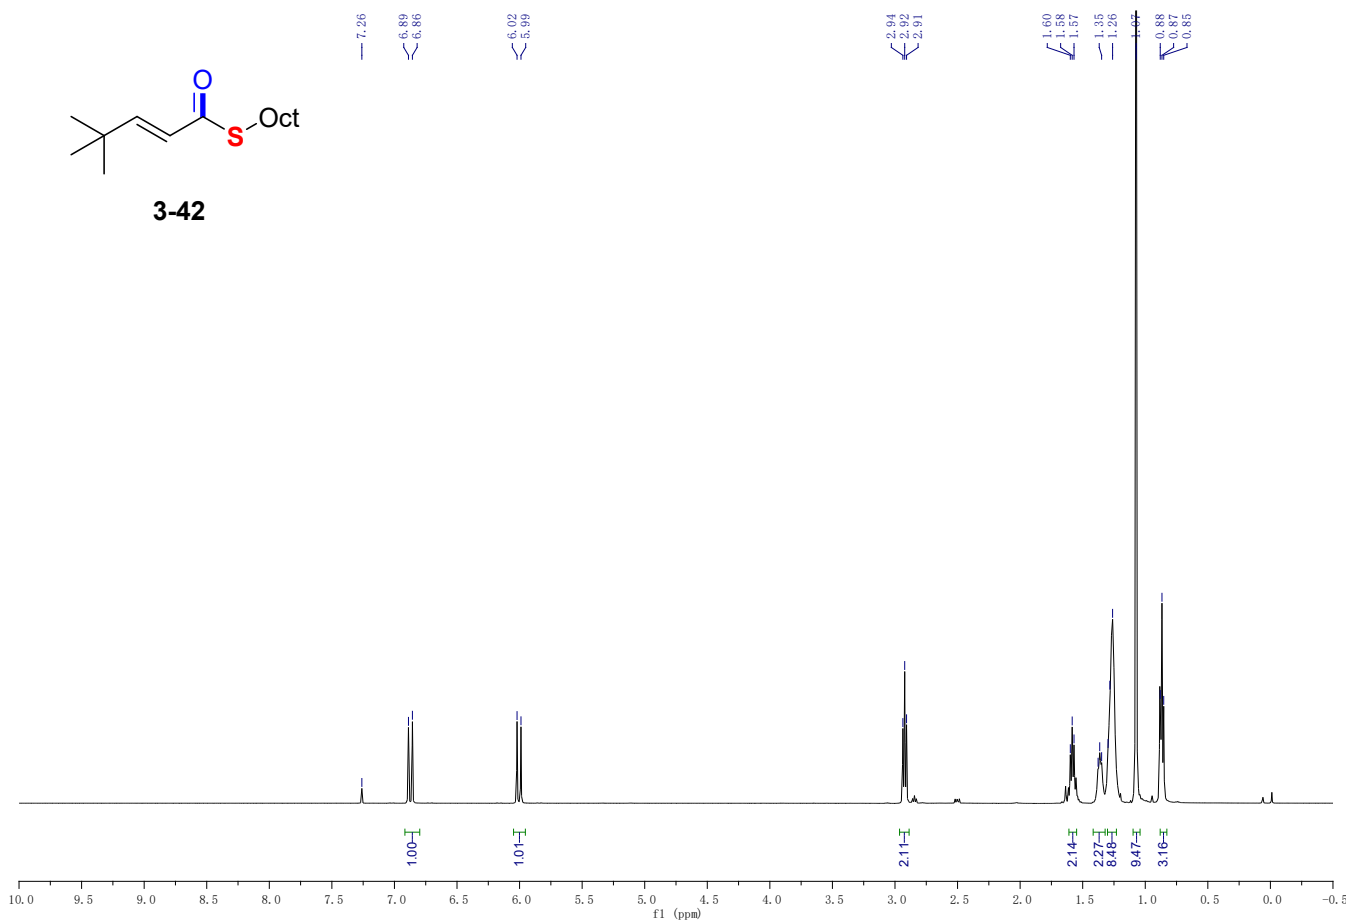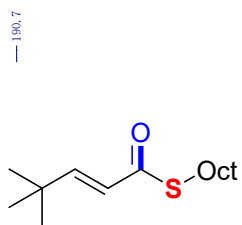

3-42

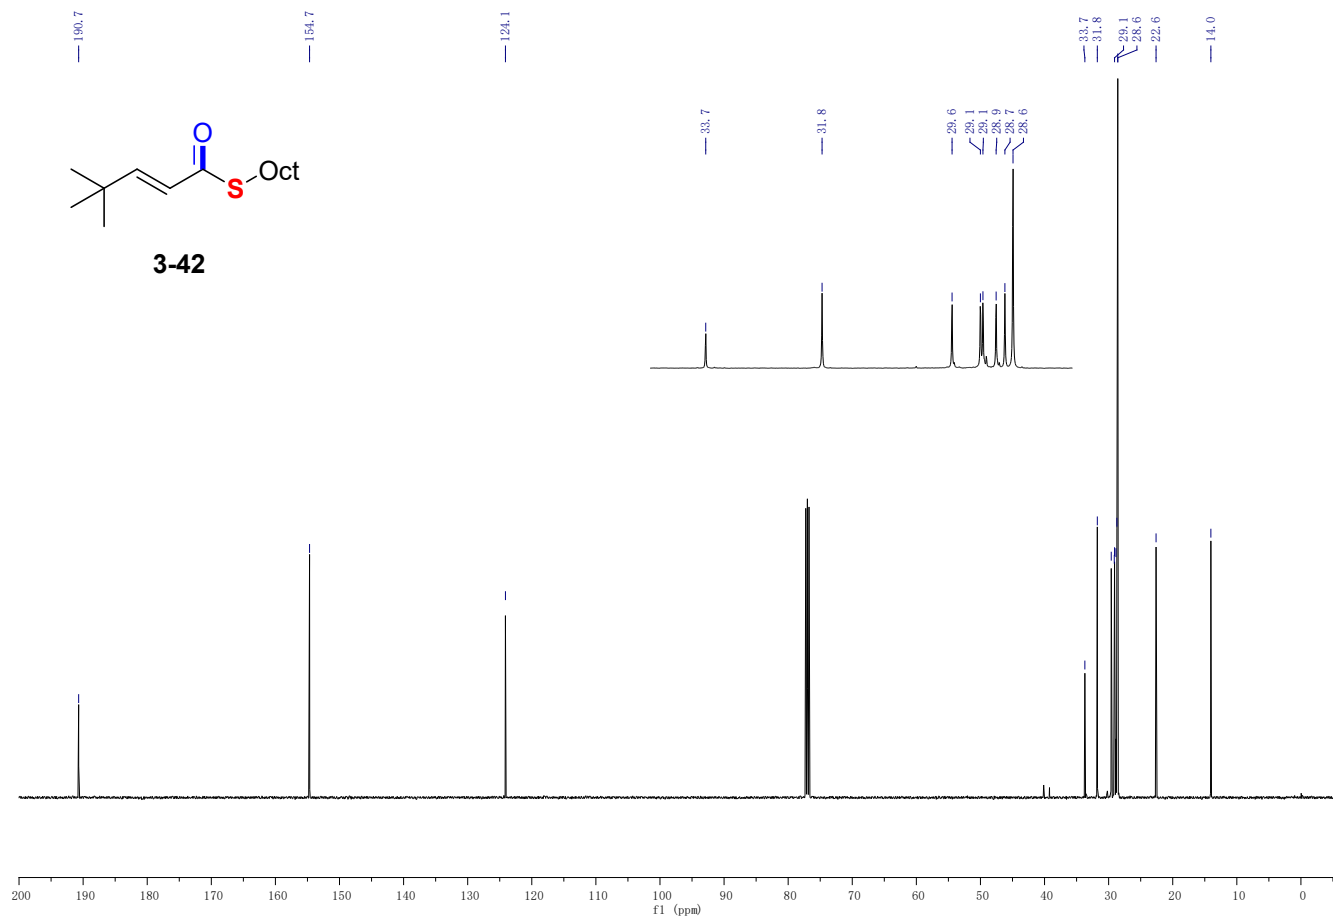

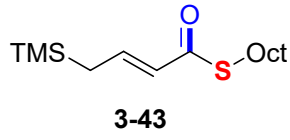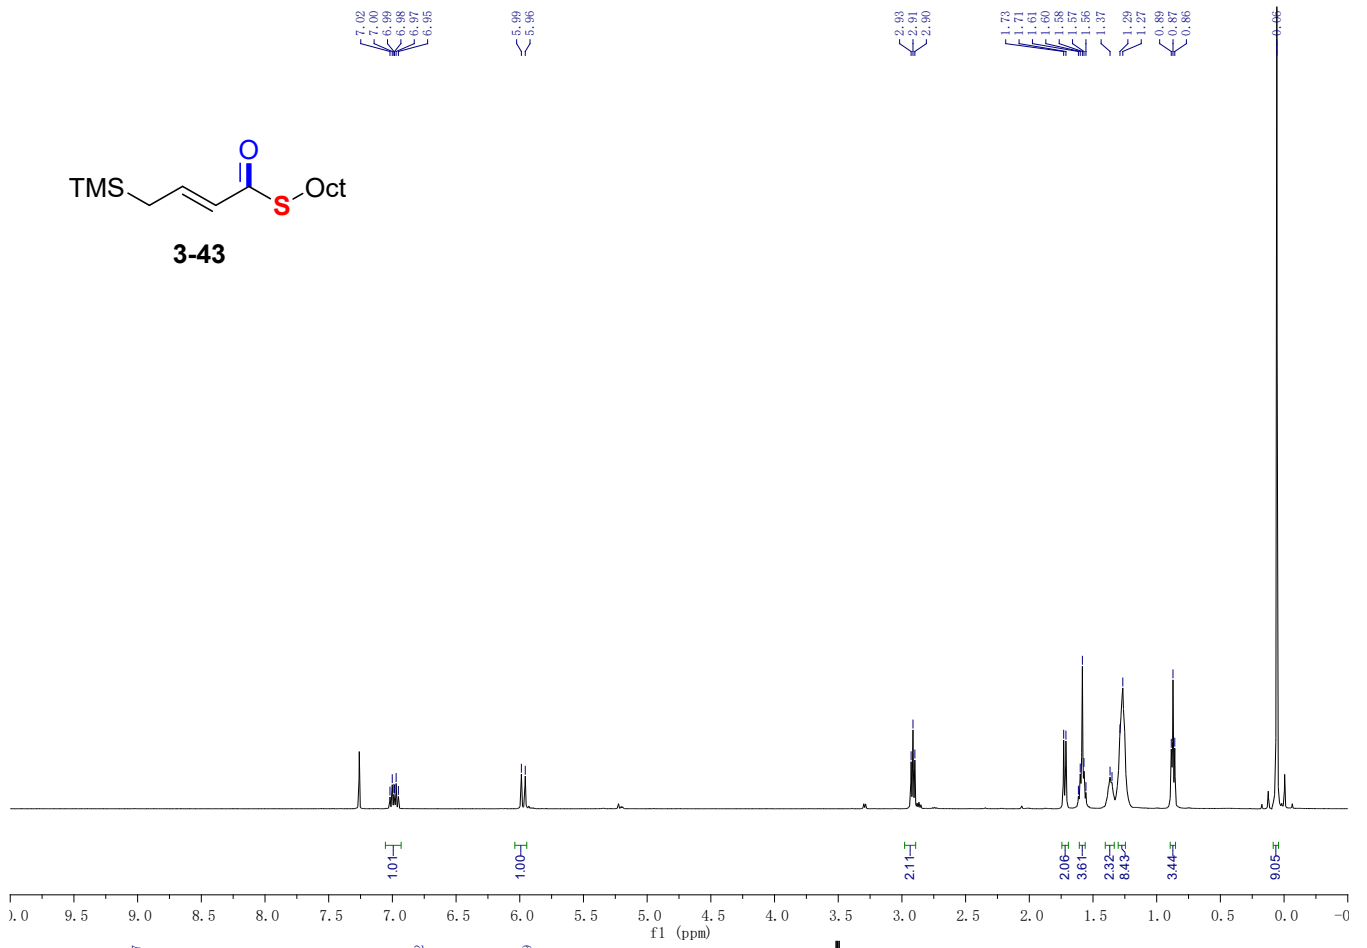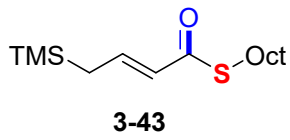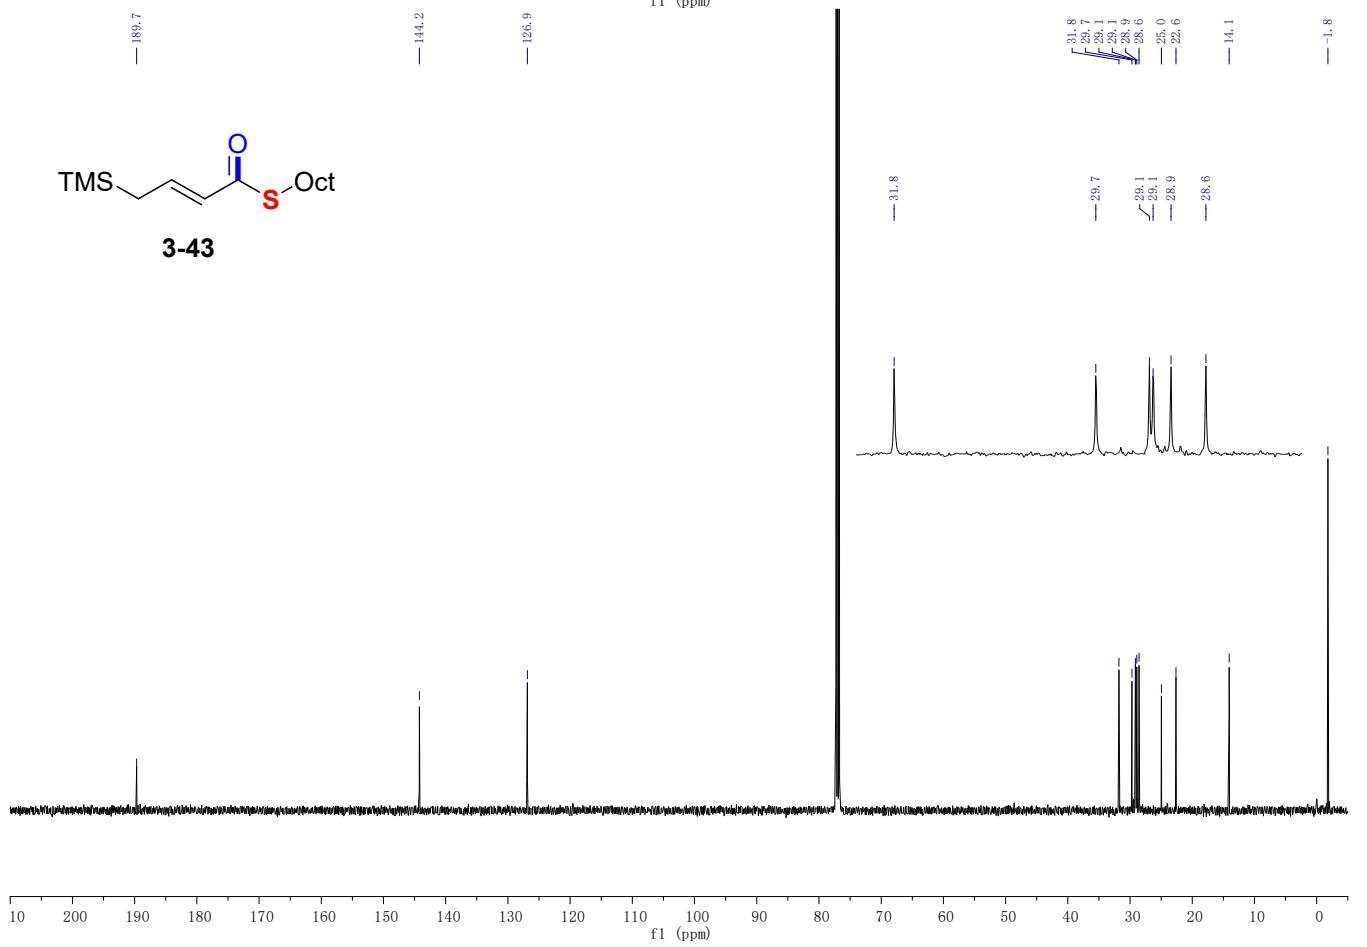

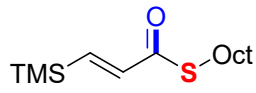

**3-44**

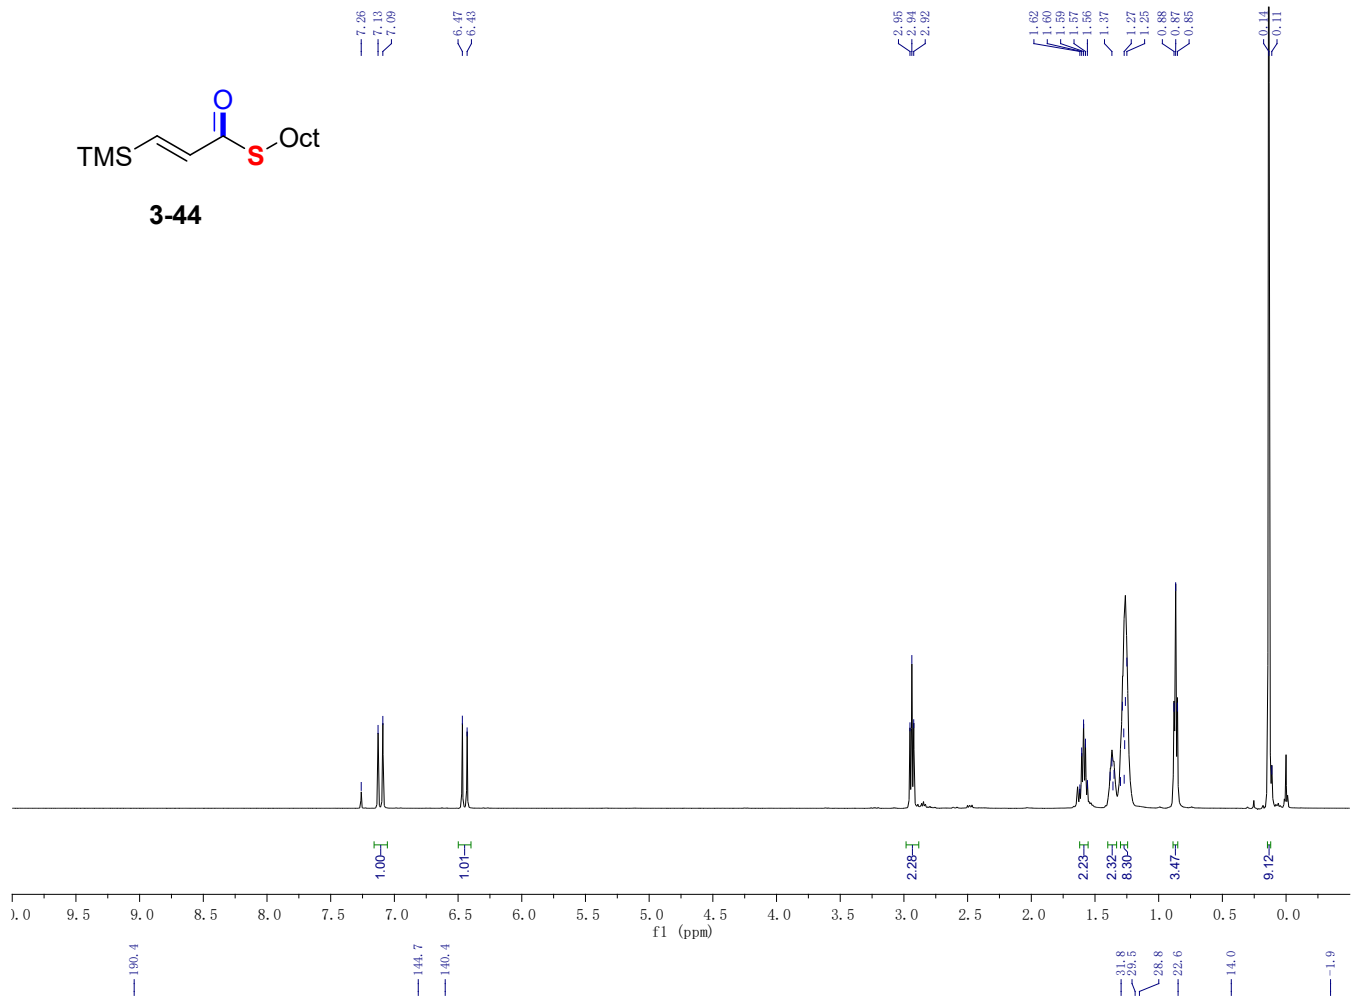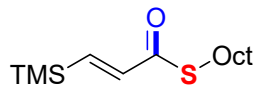

**3-44**

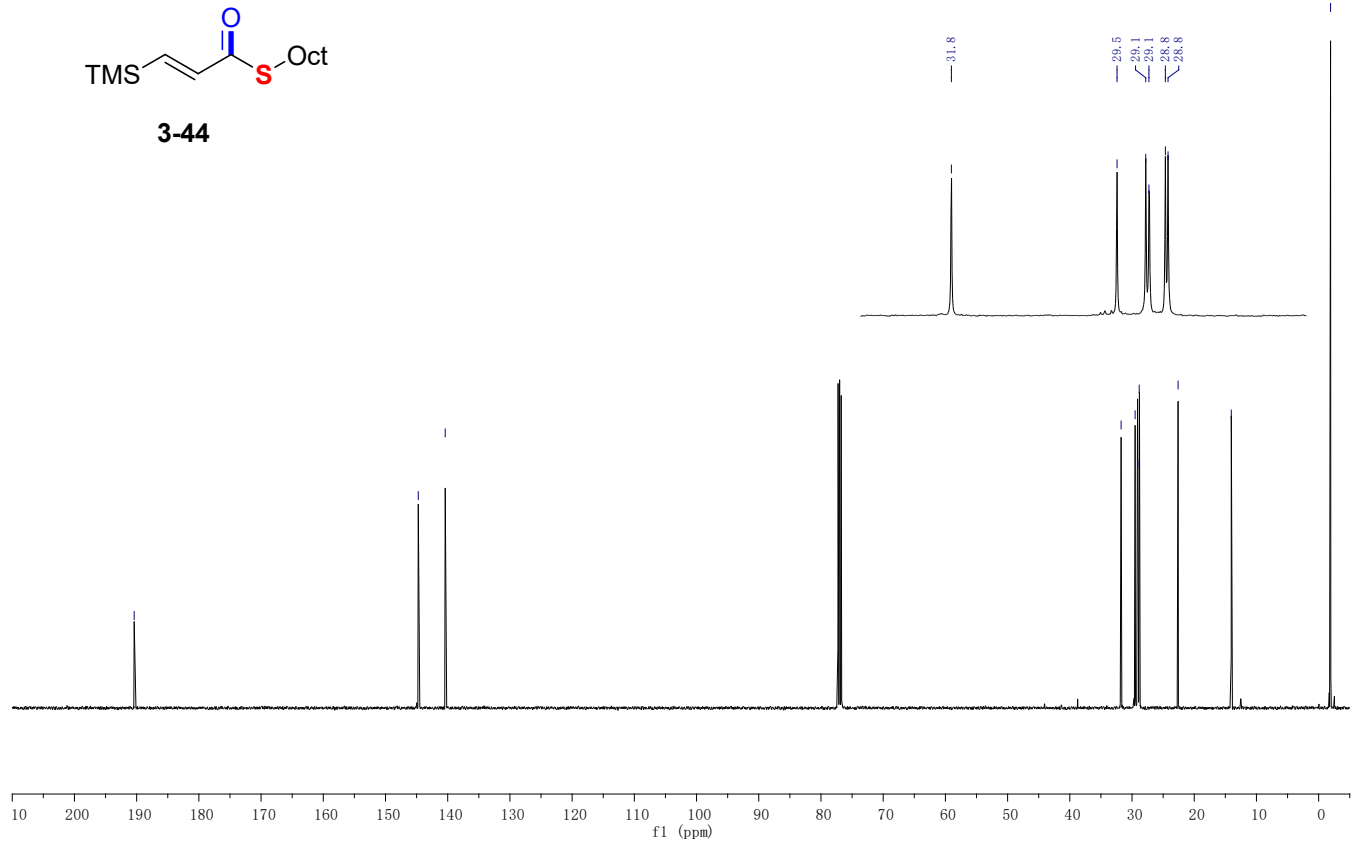

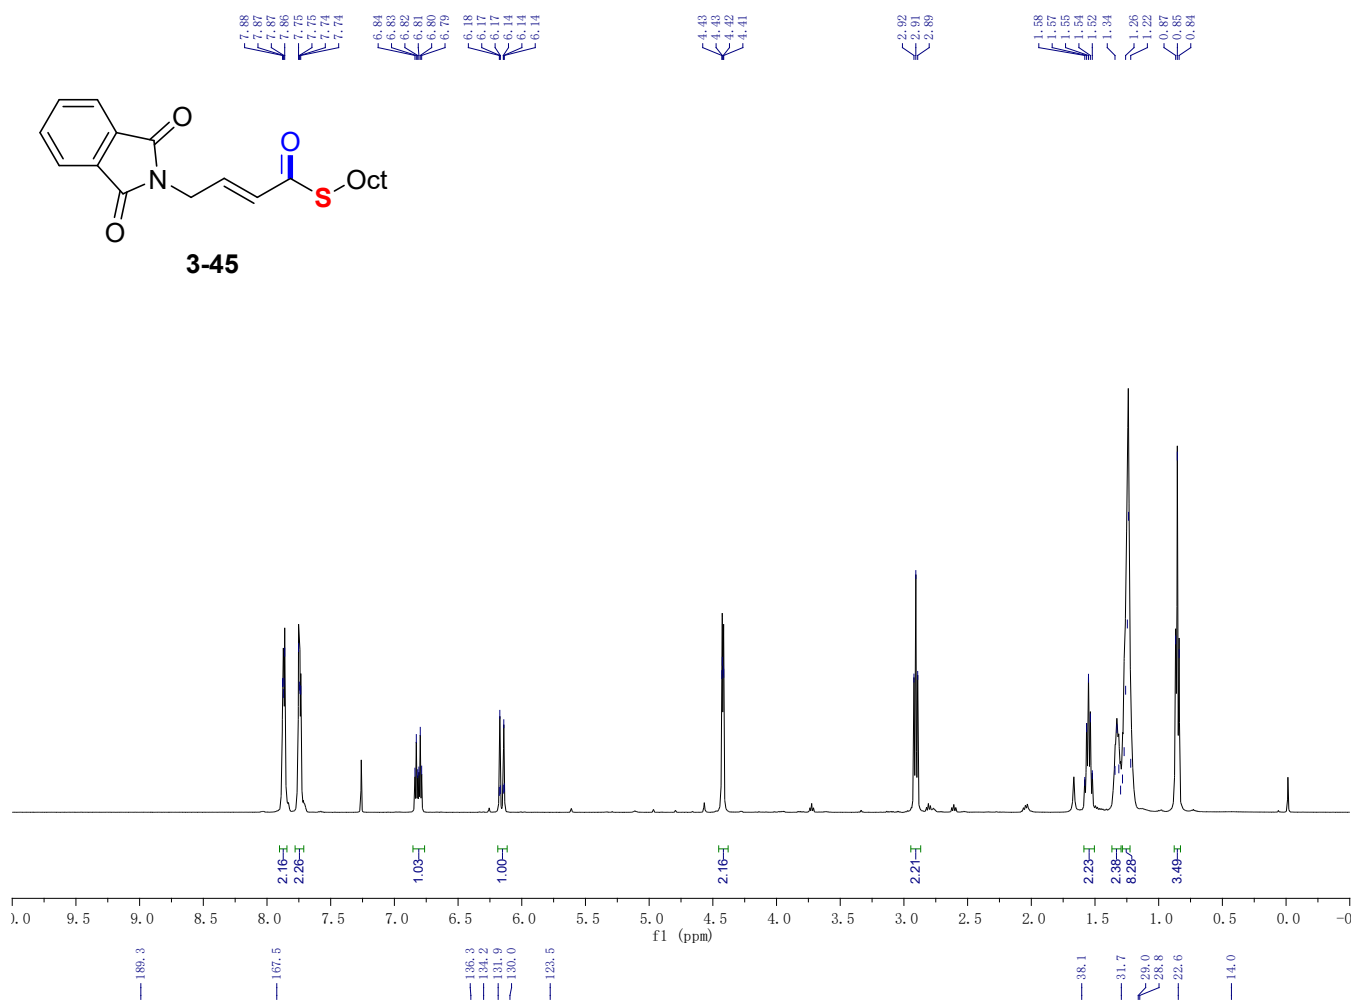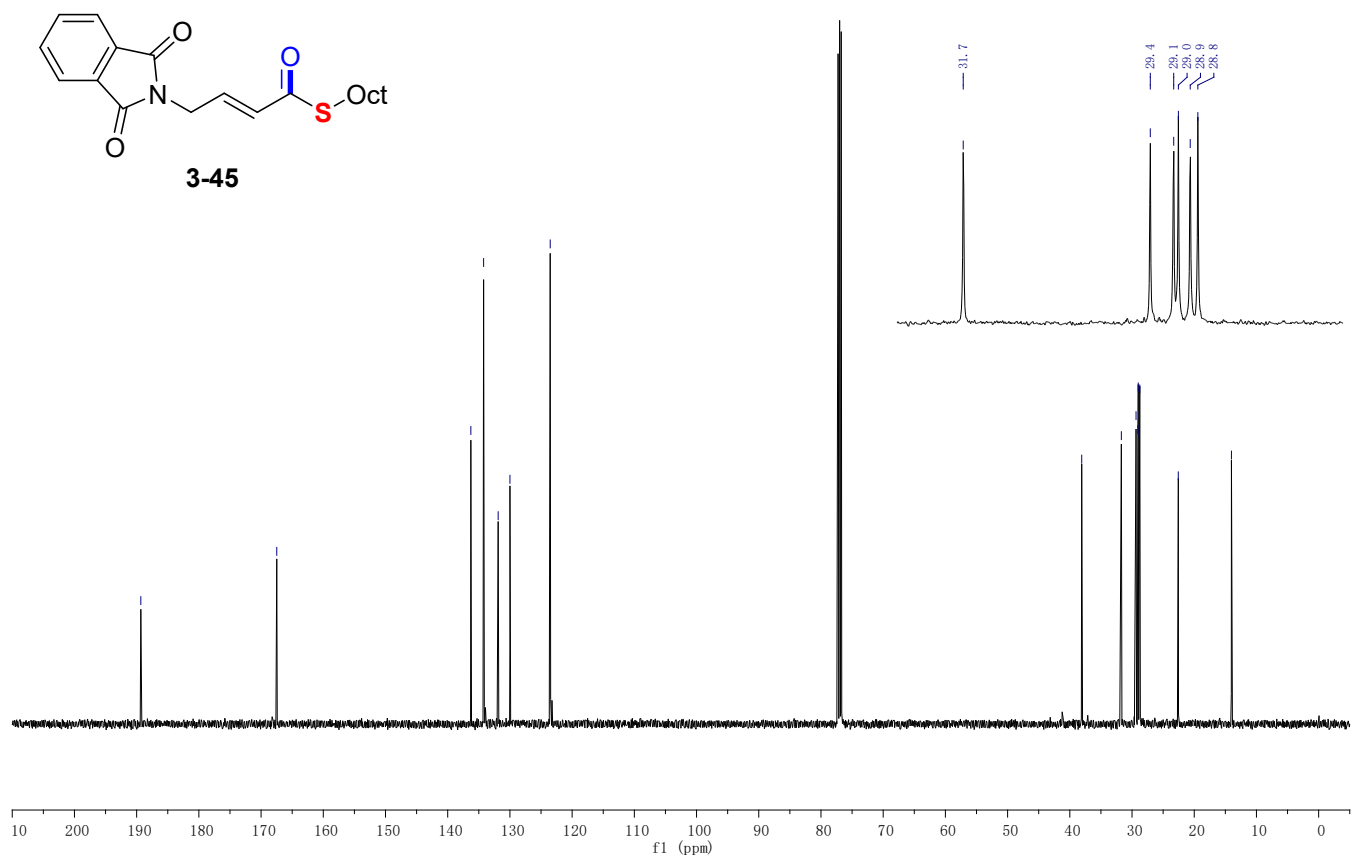

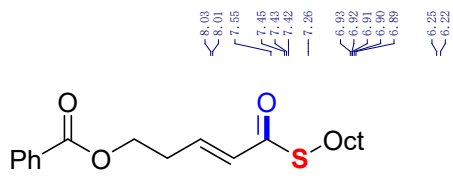

3-46

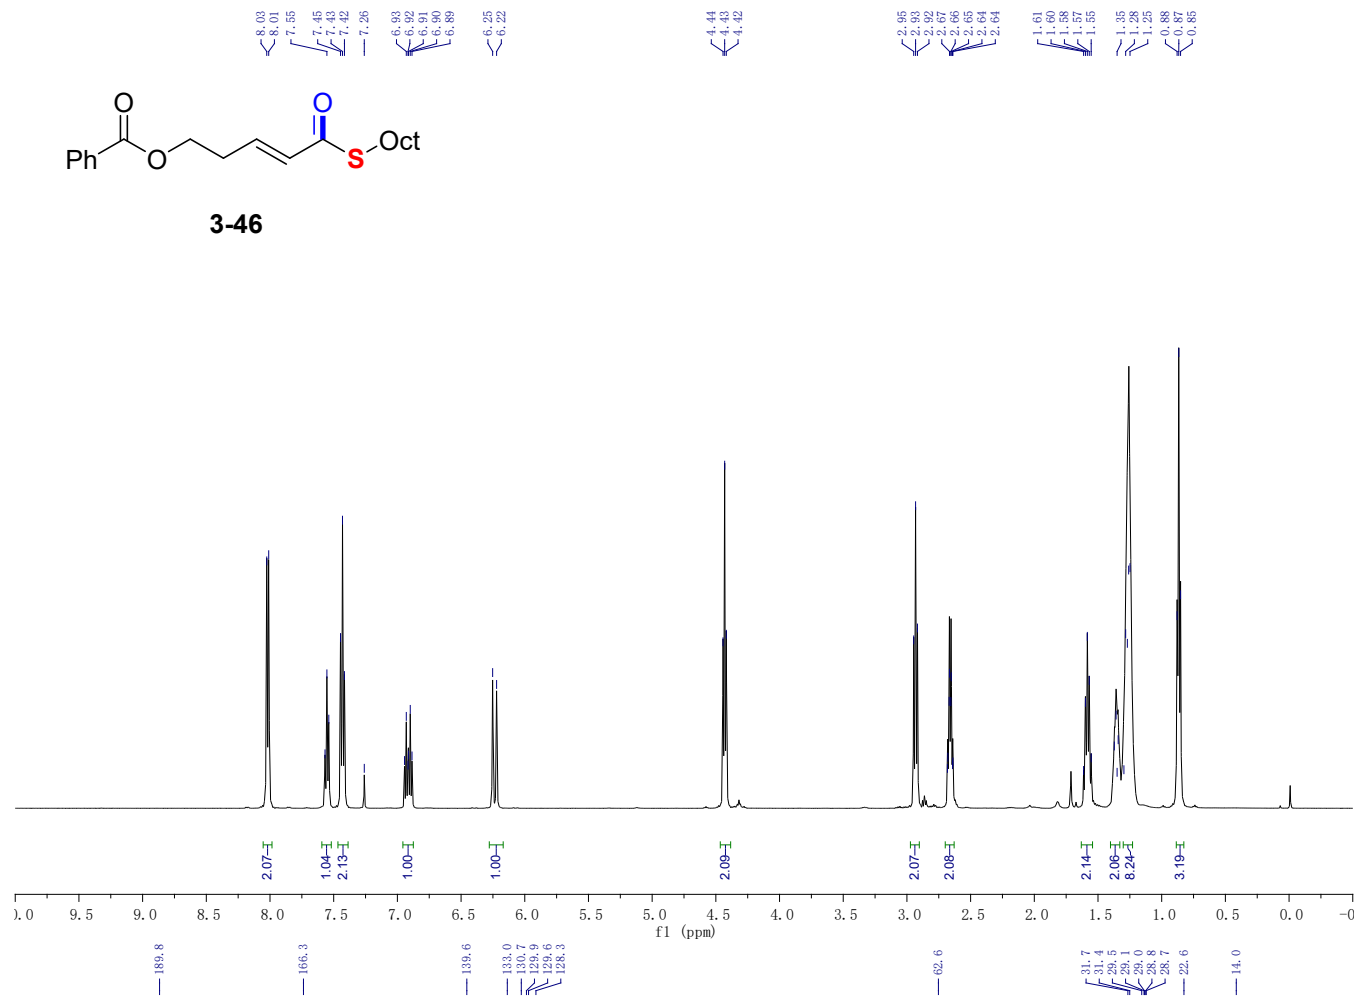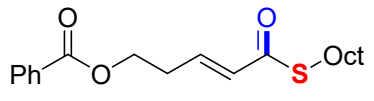

3-46

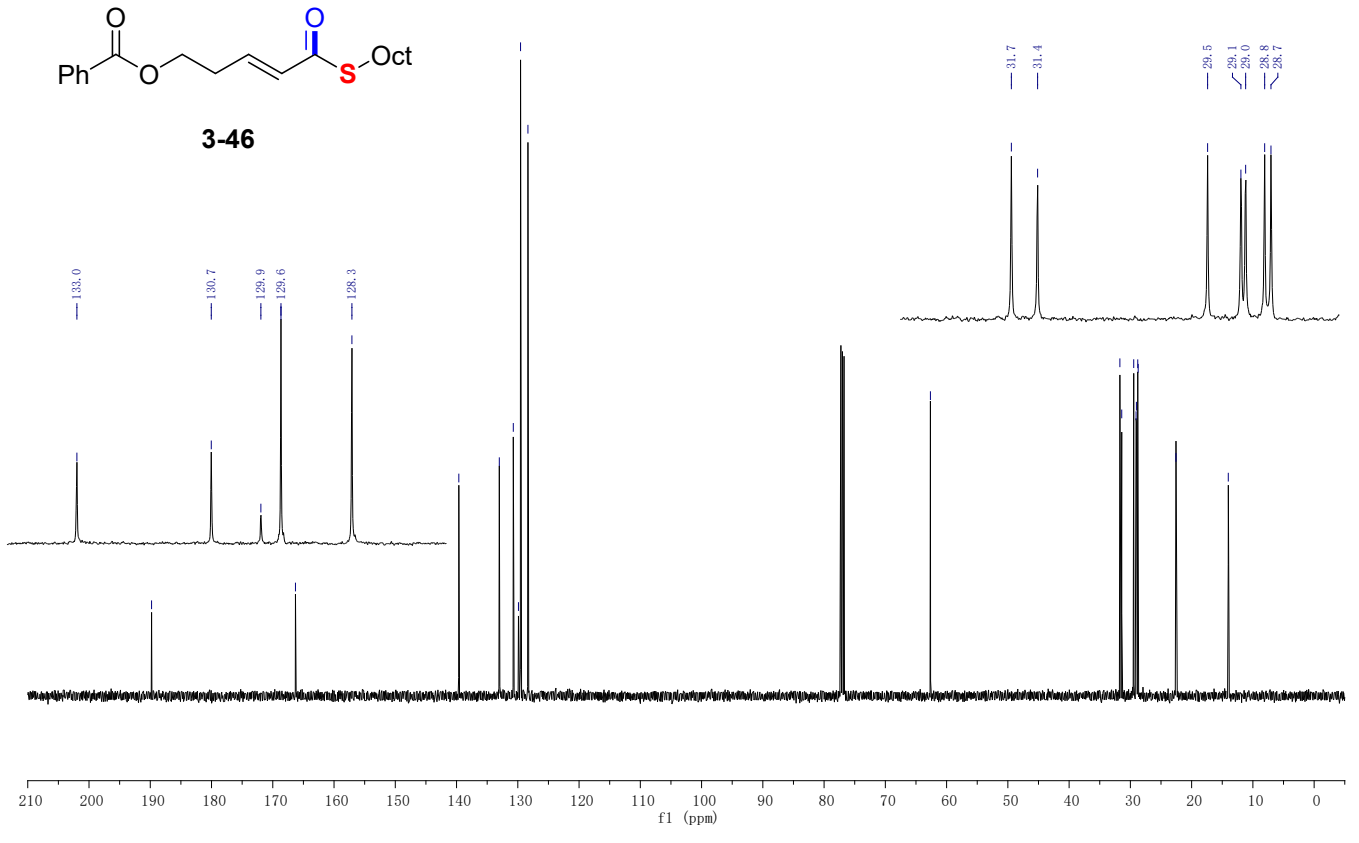

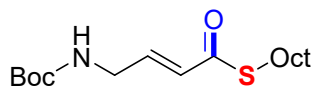

3-47

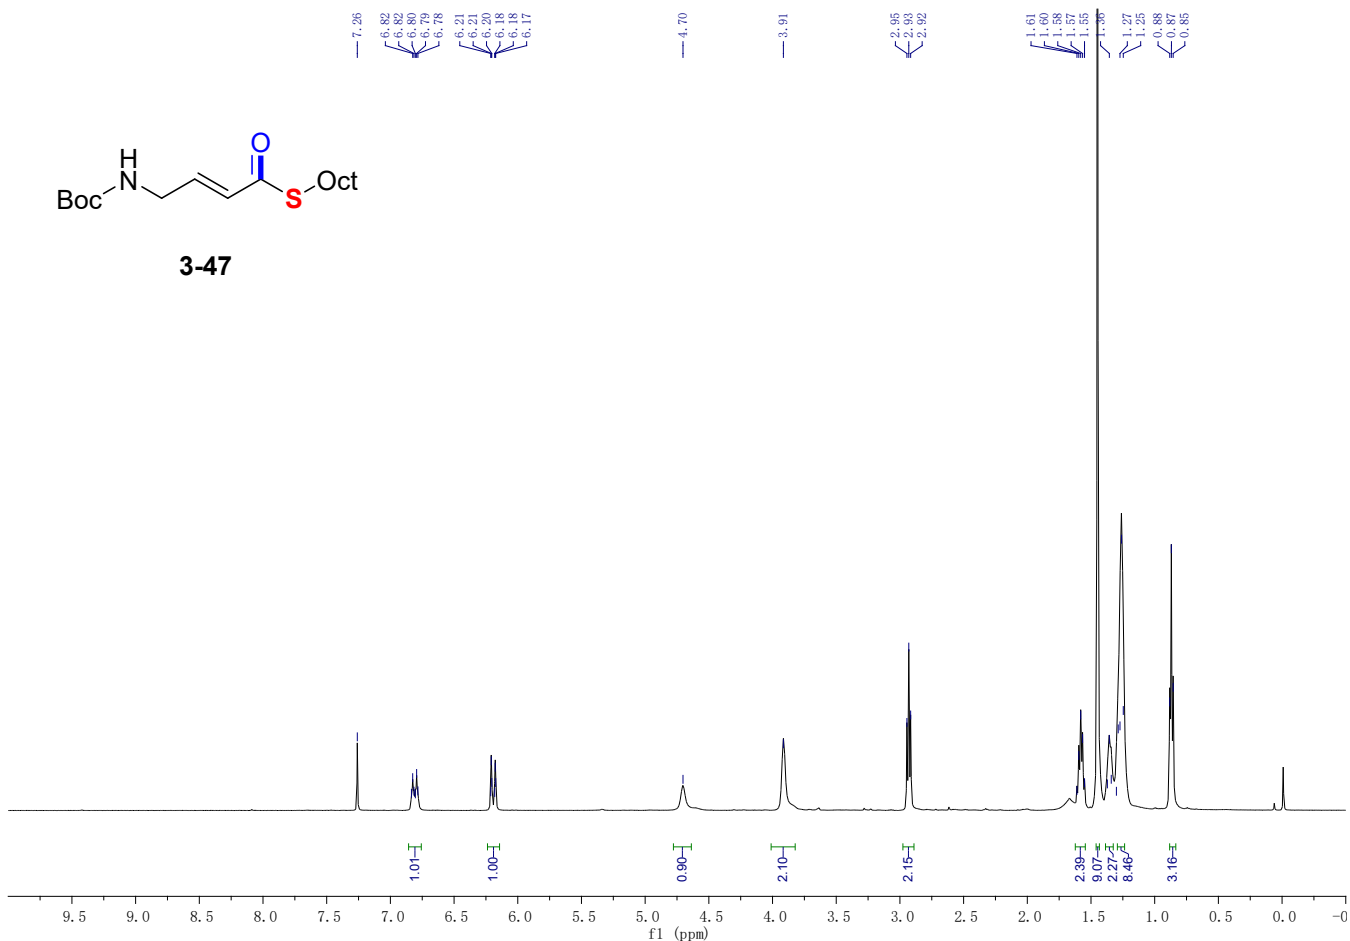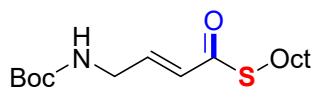

3-47

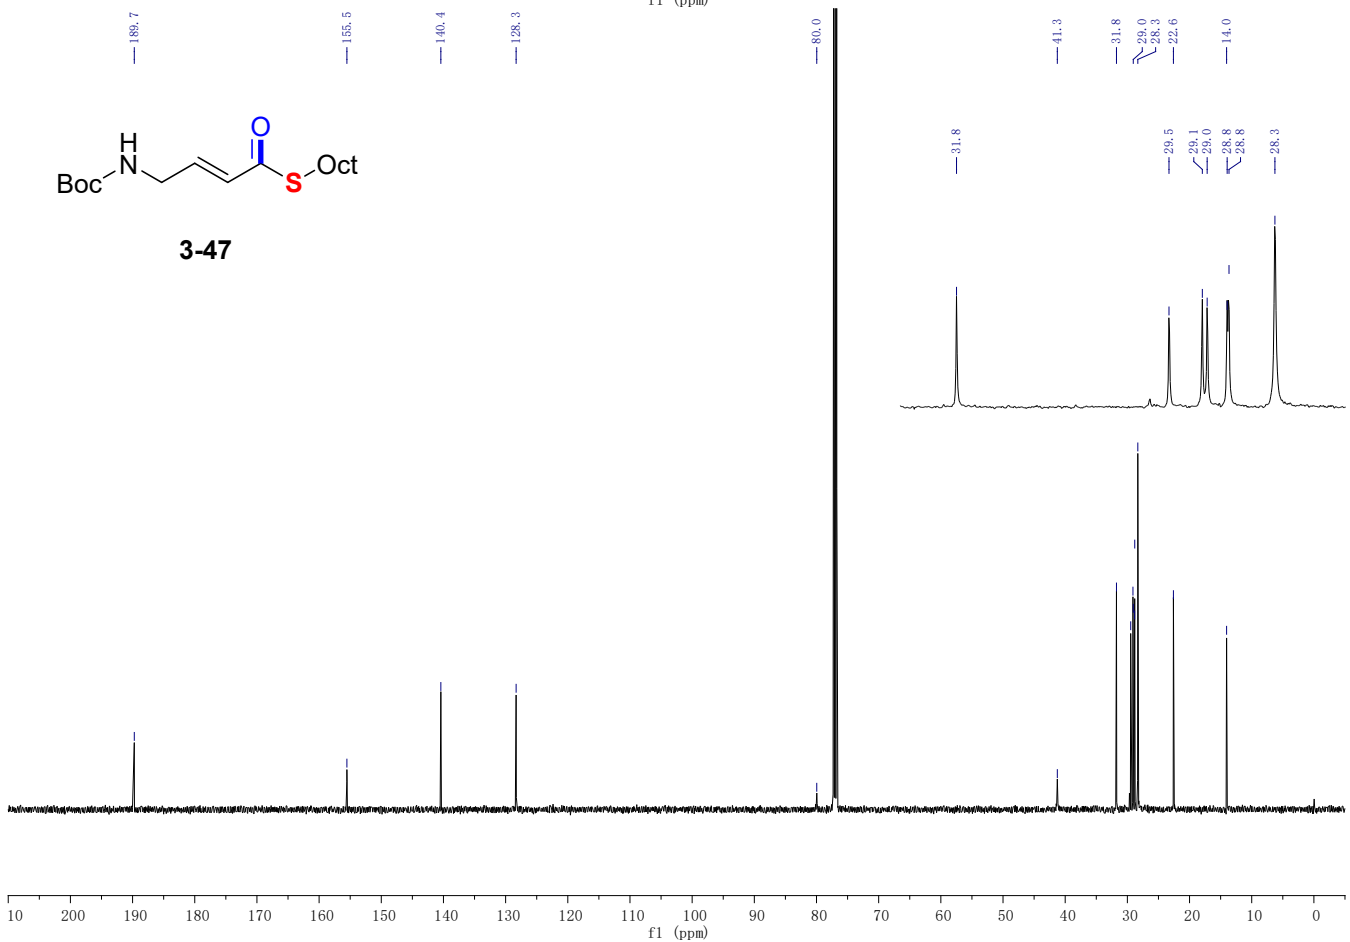



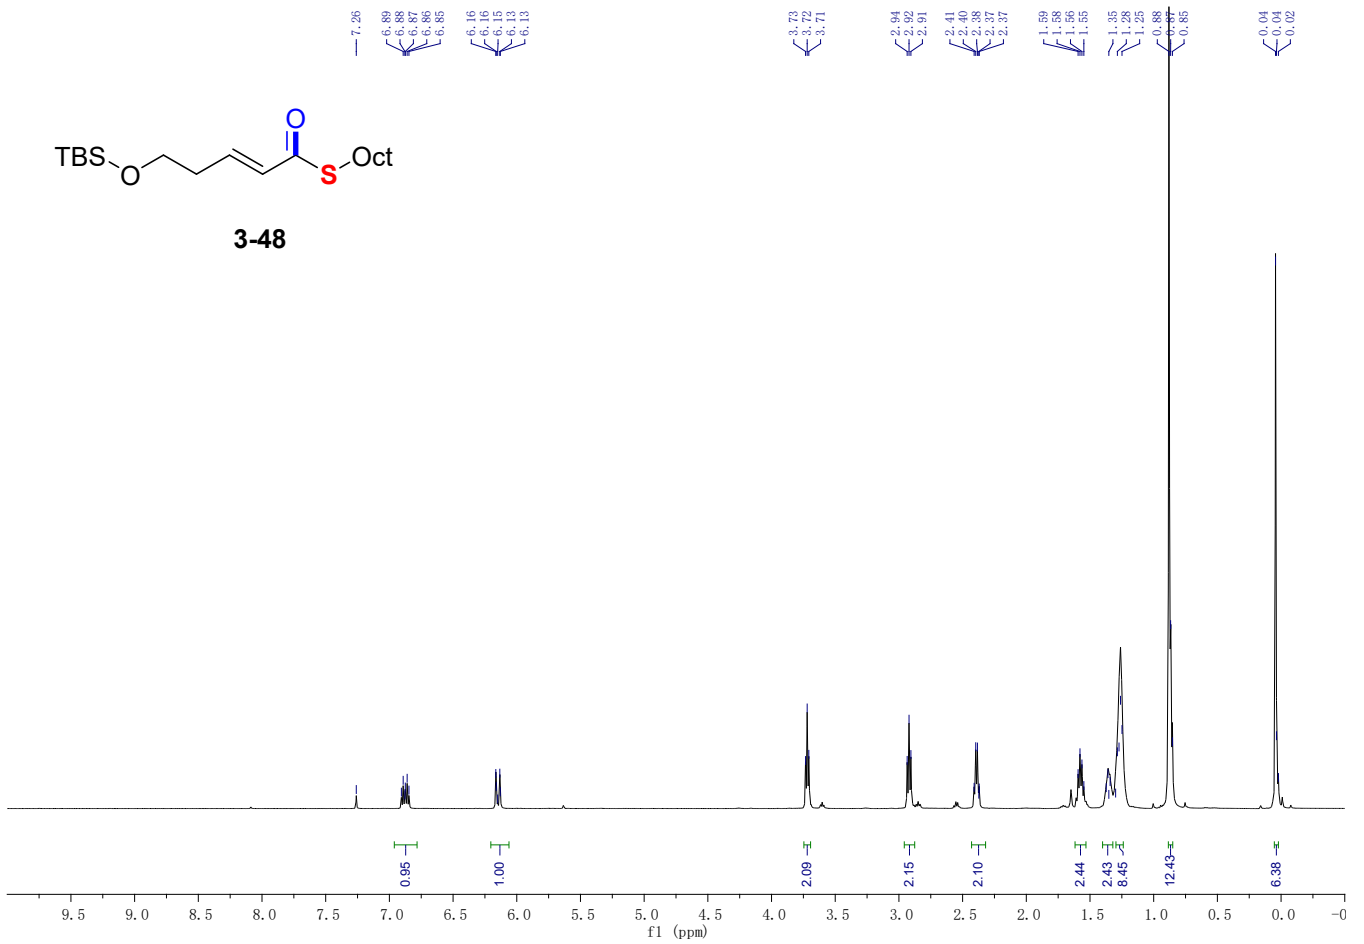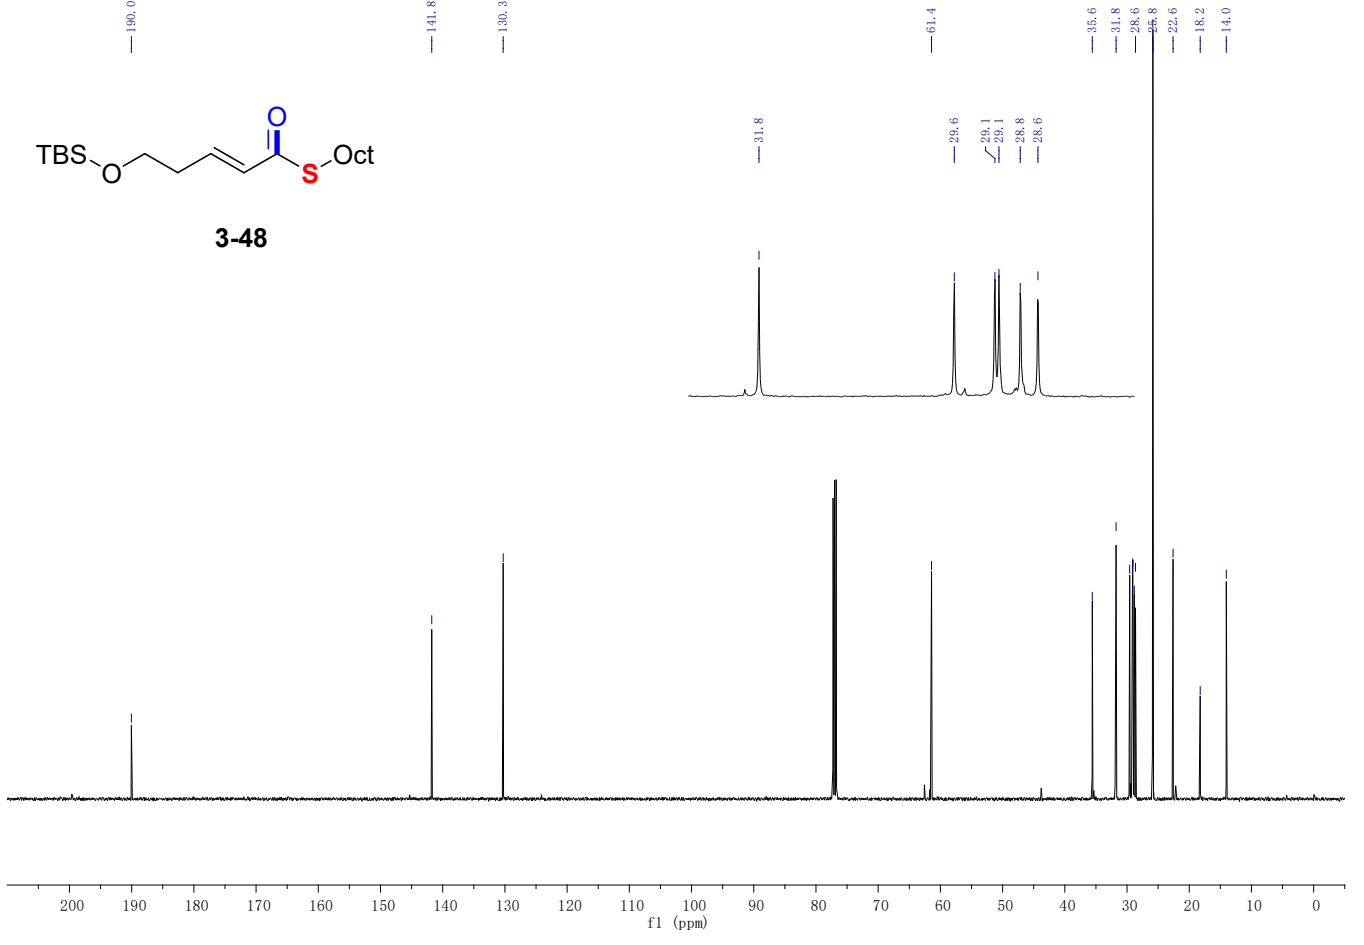

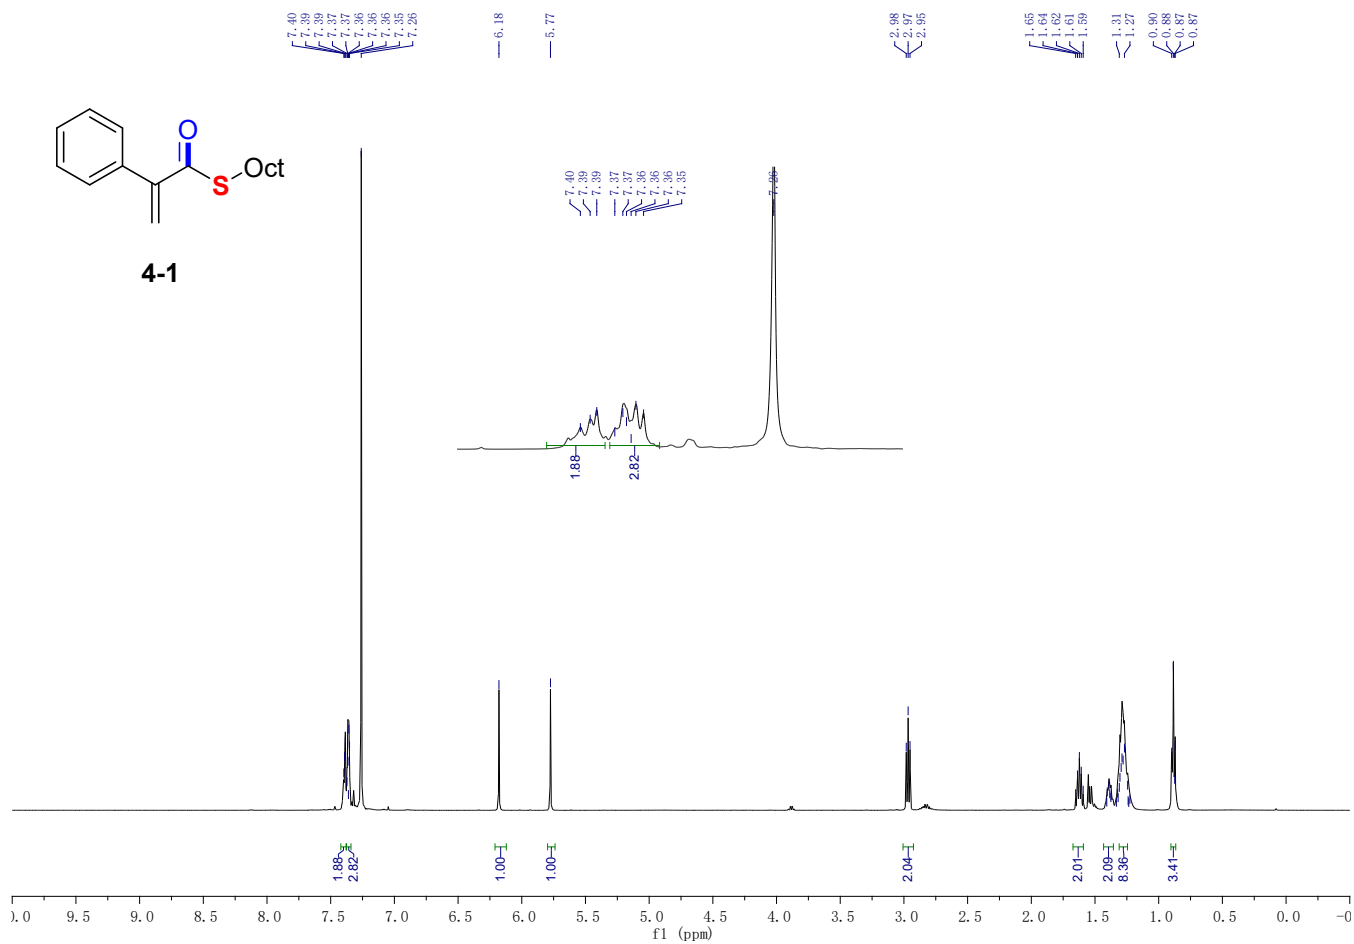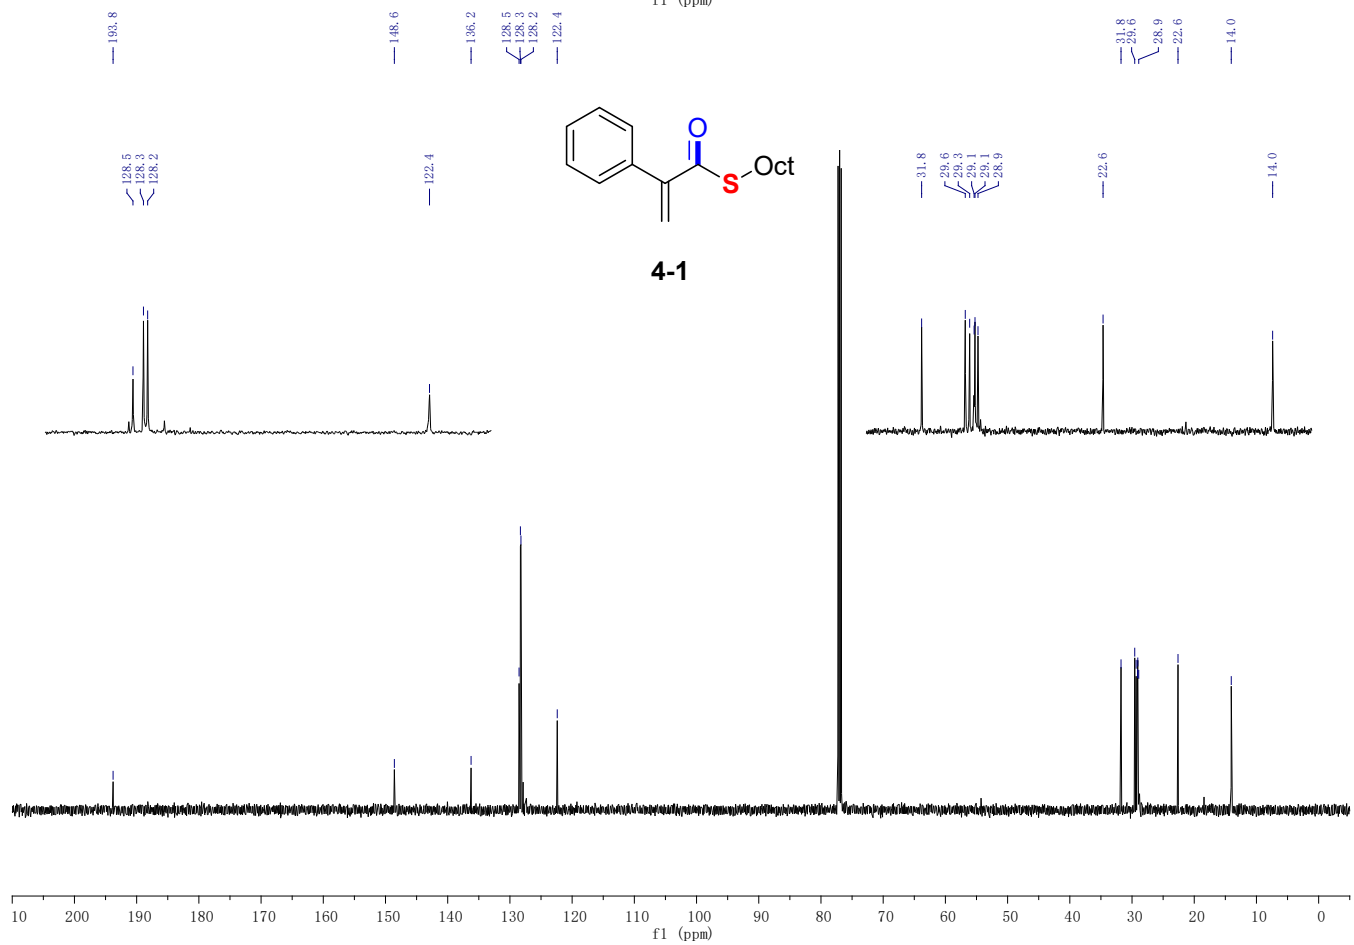

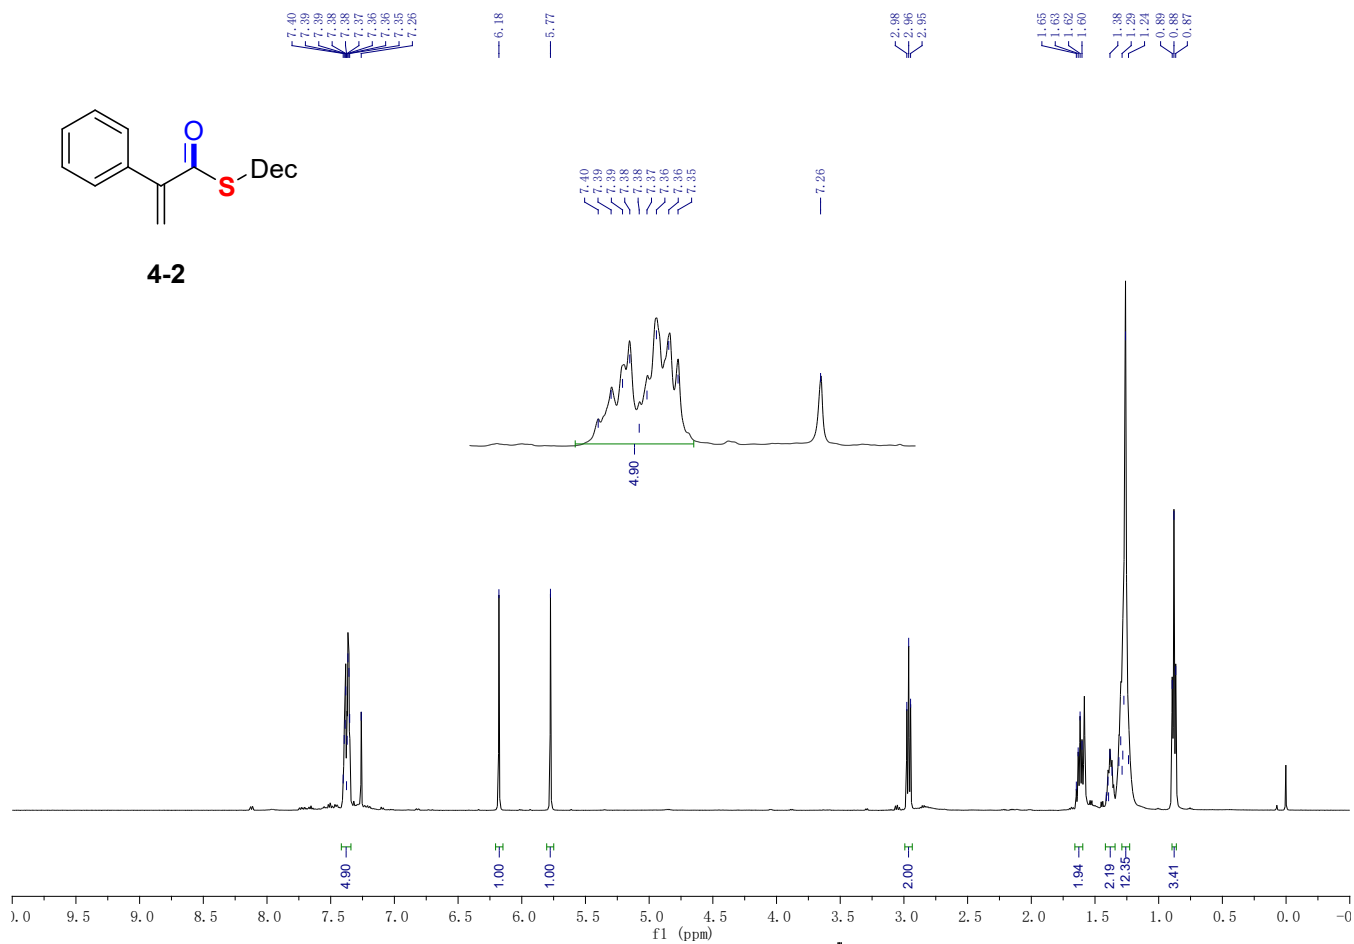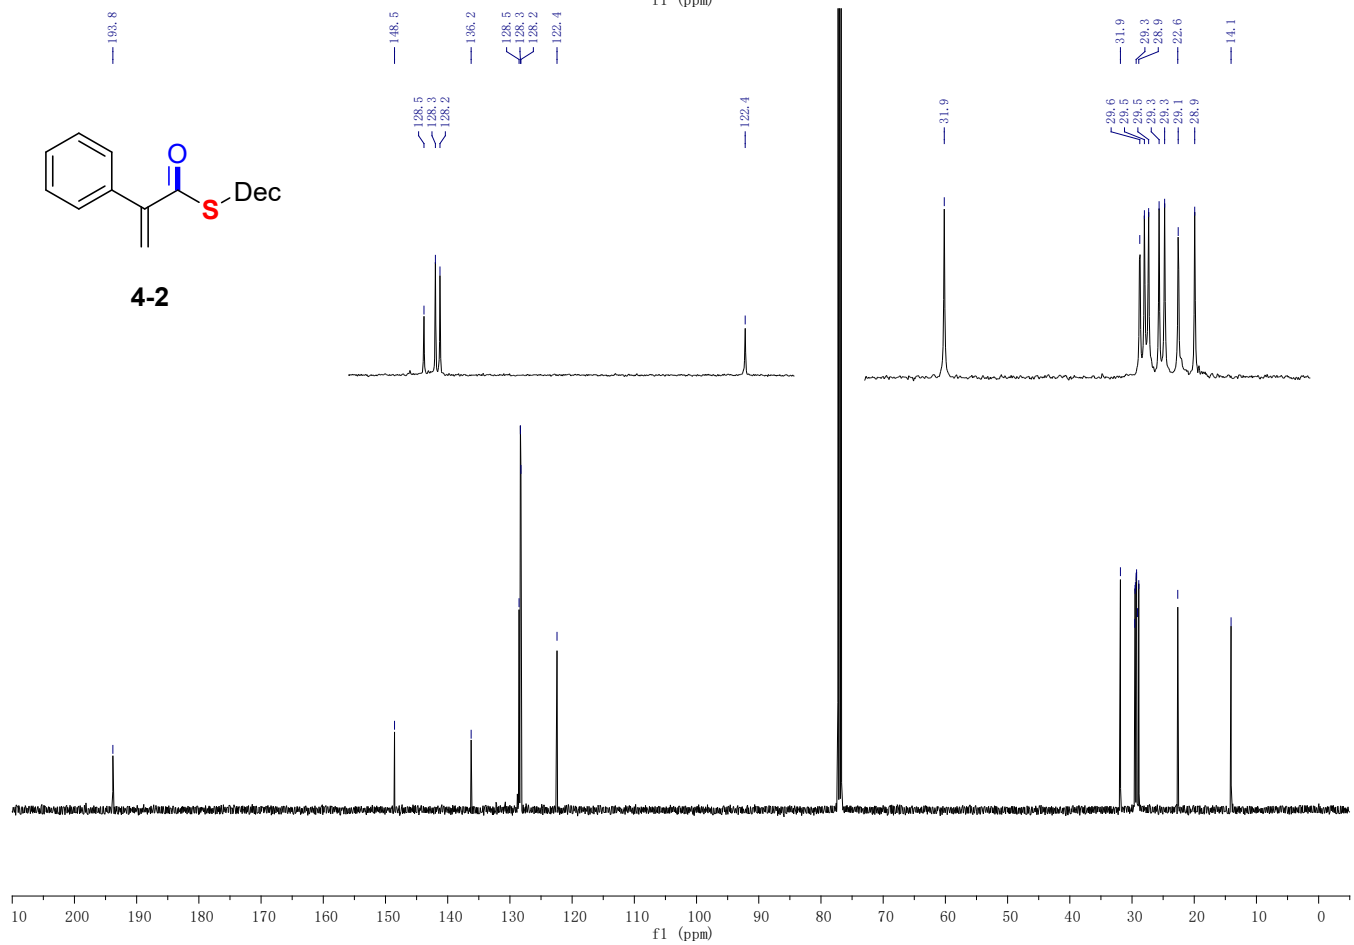

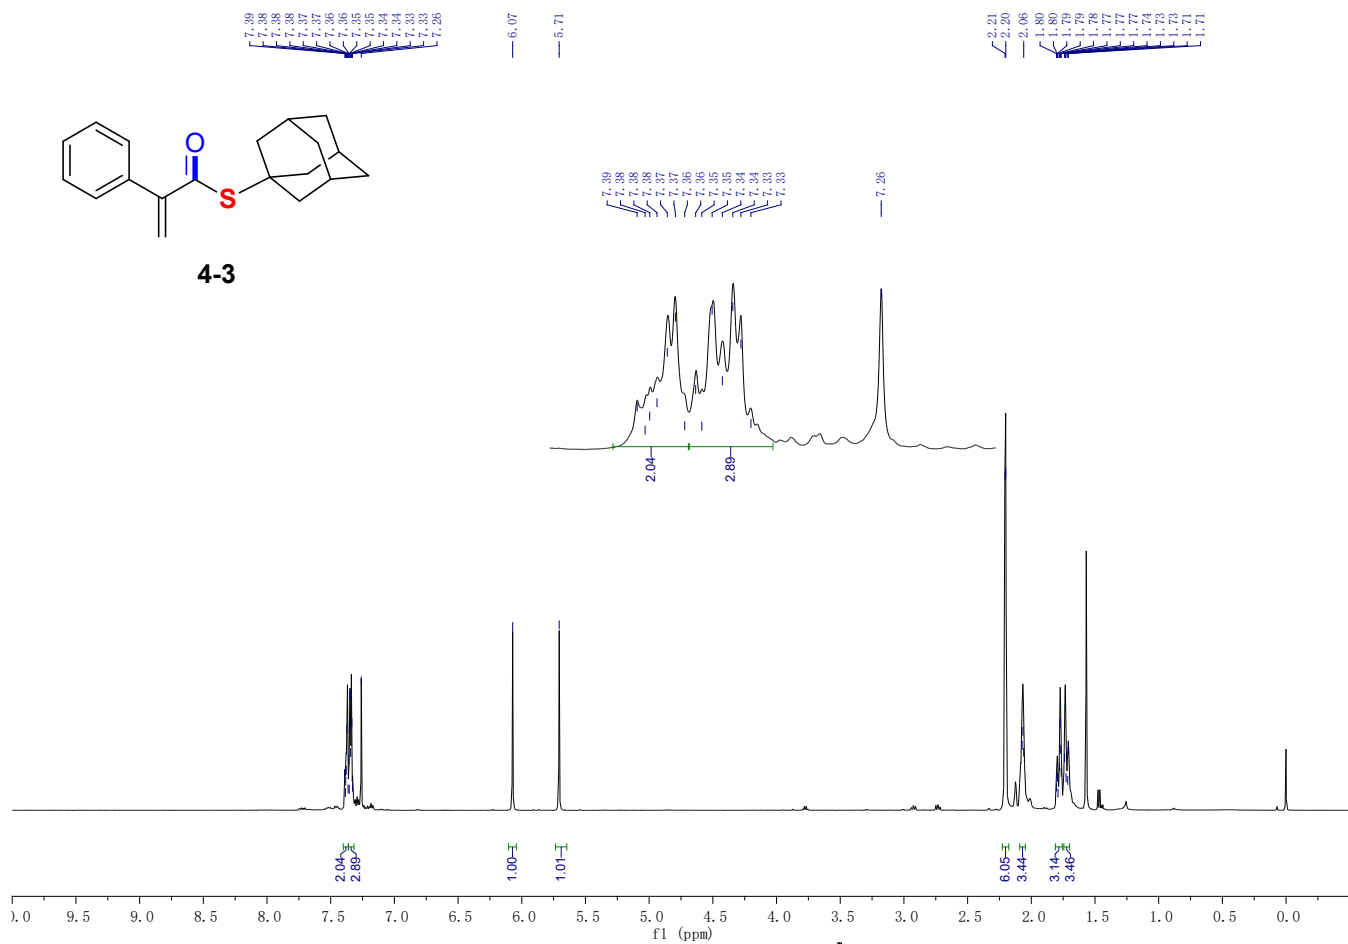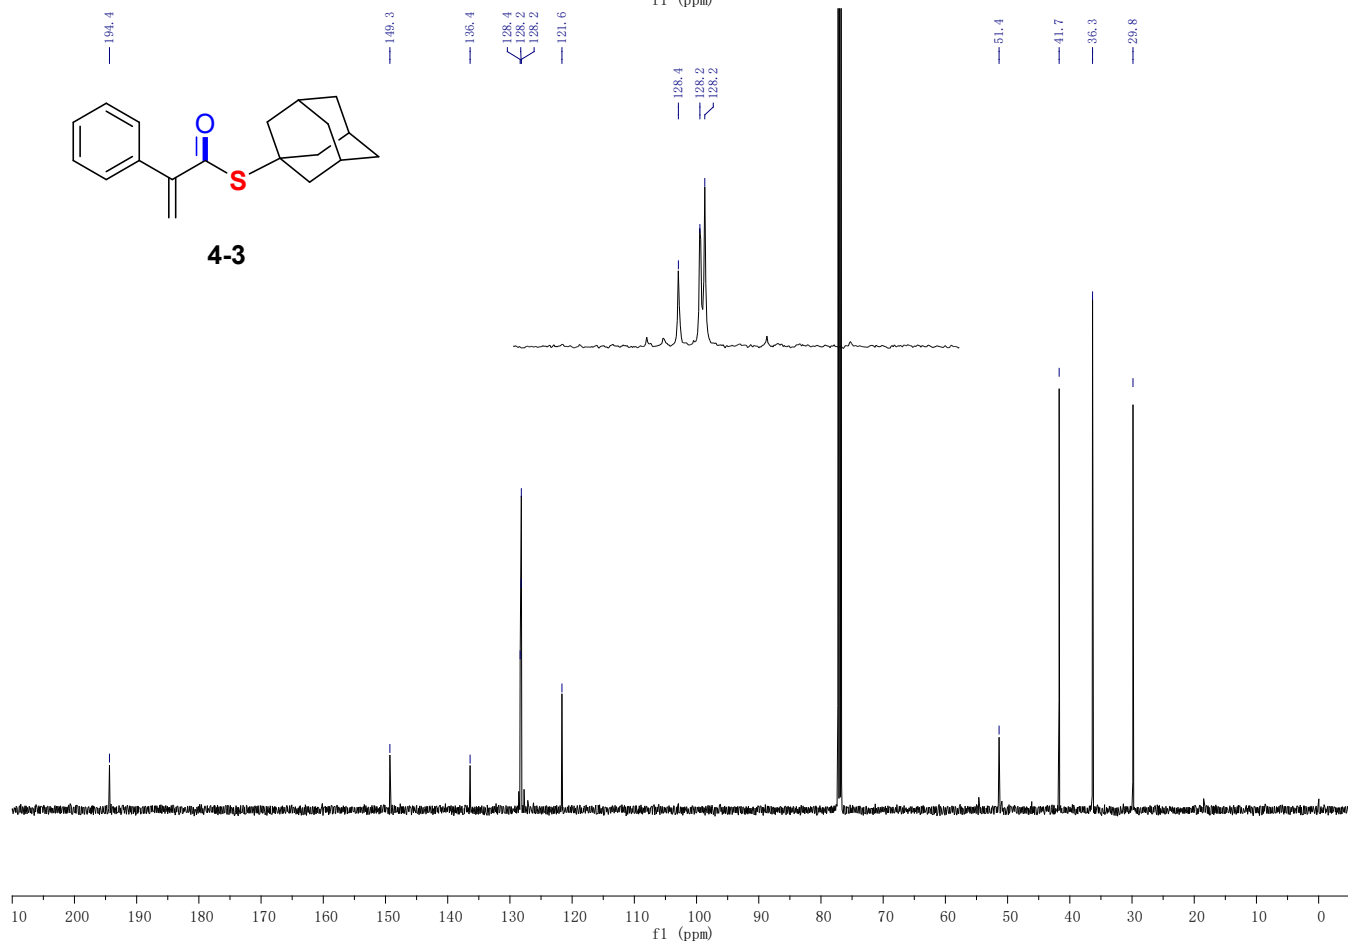

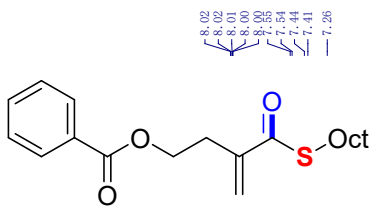

4-4

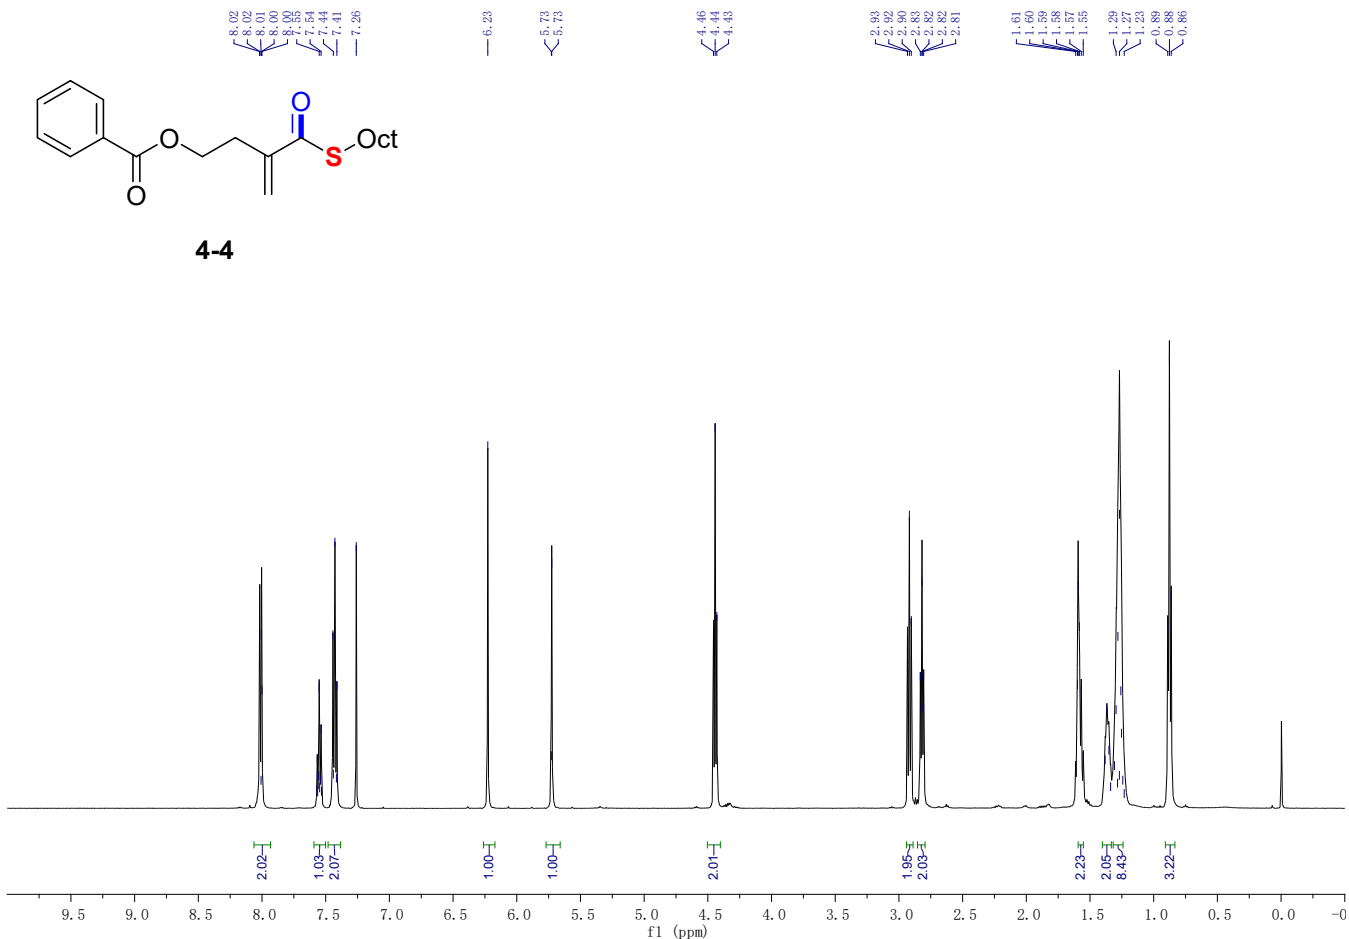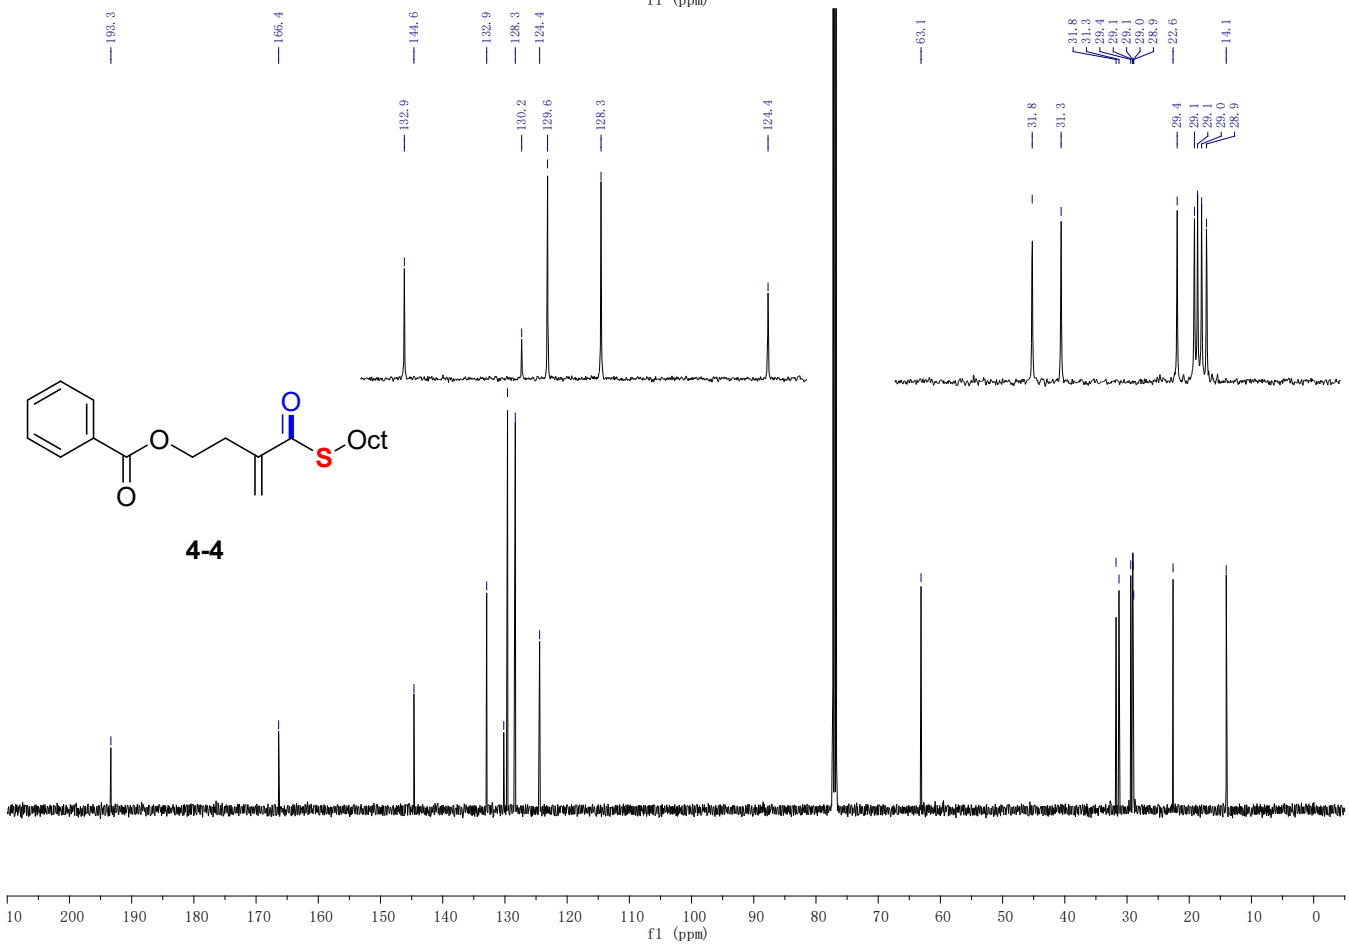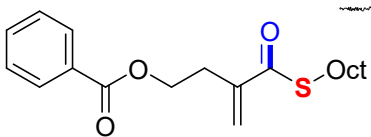

4-4

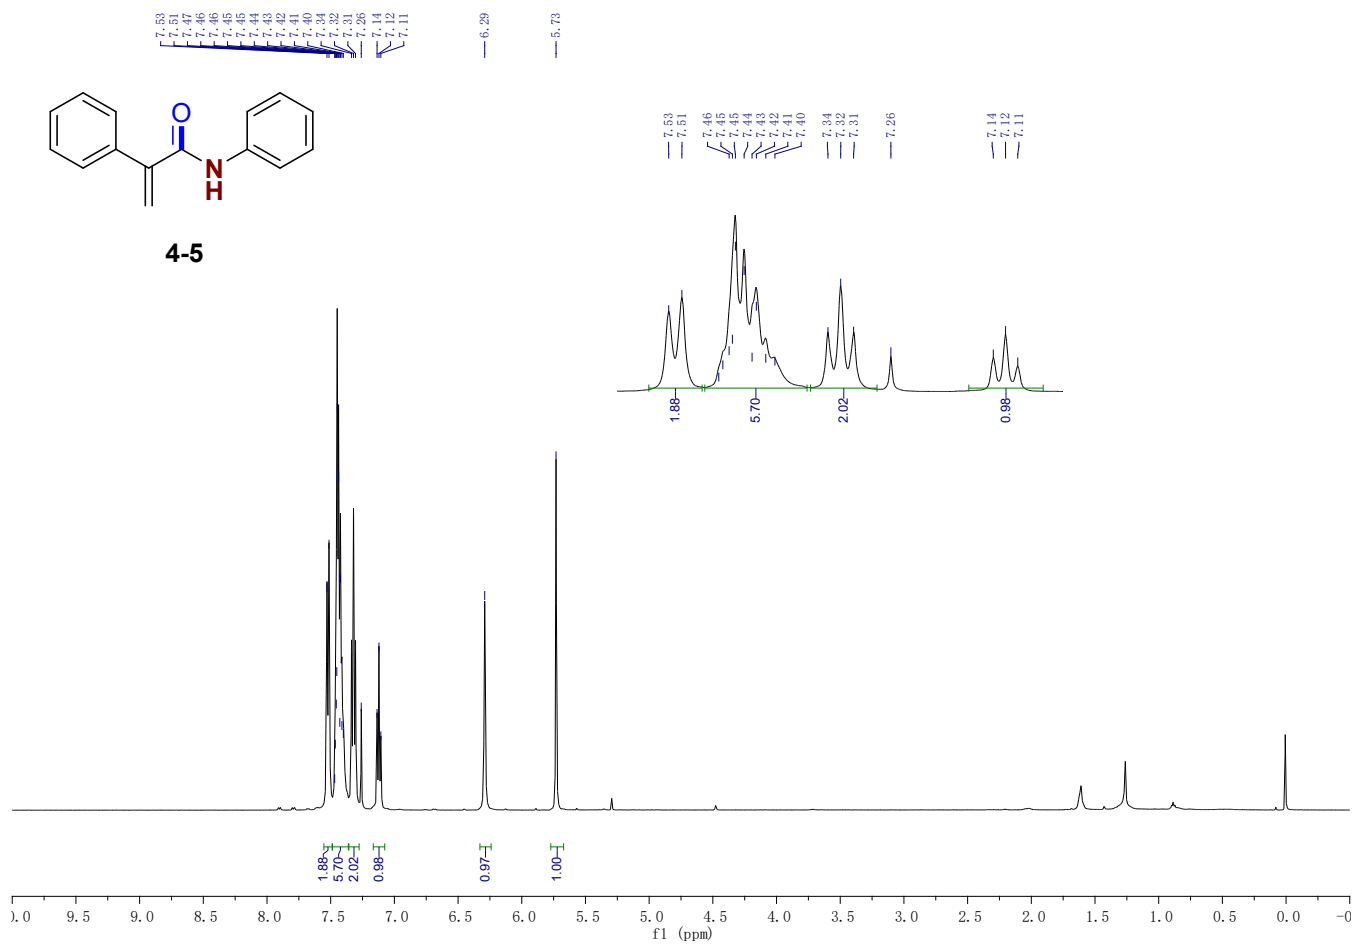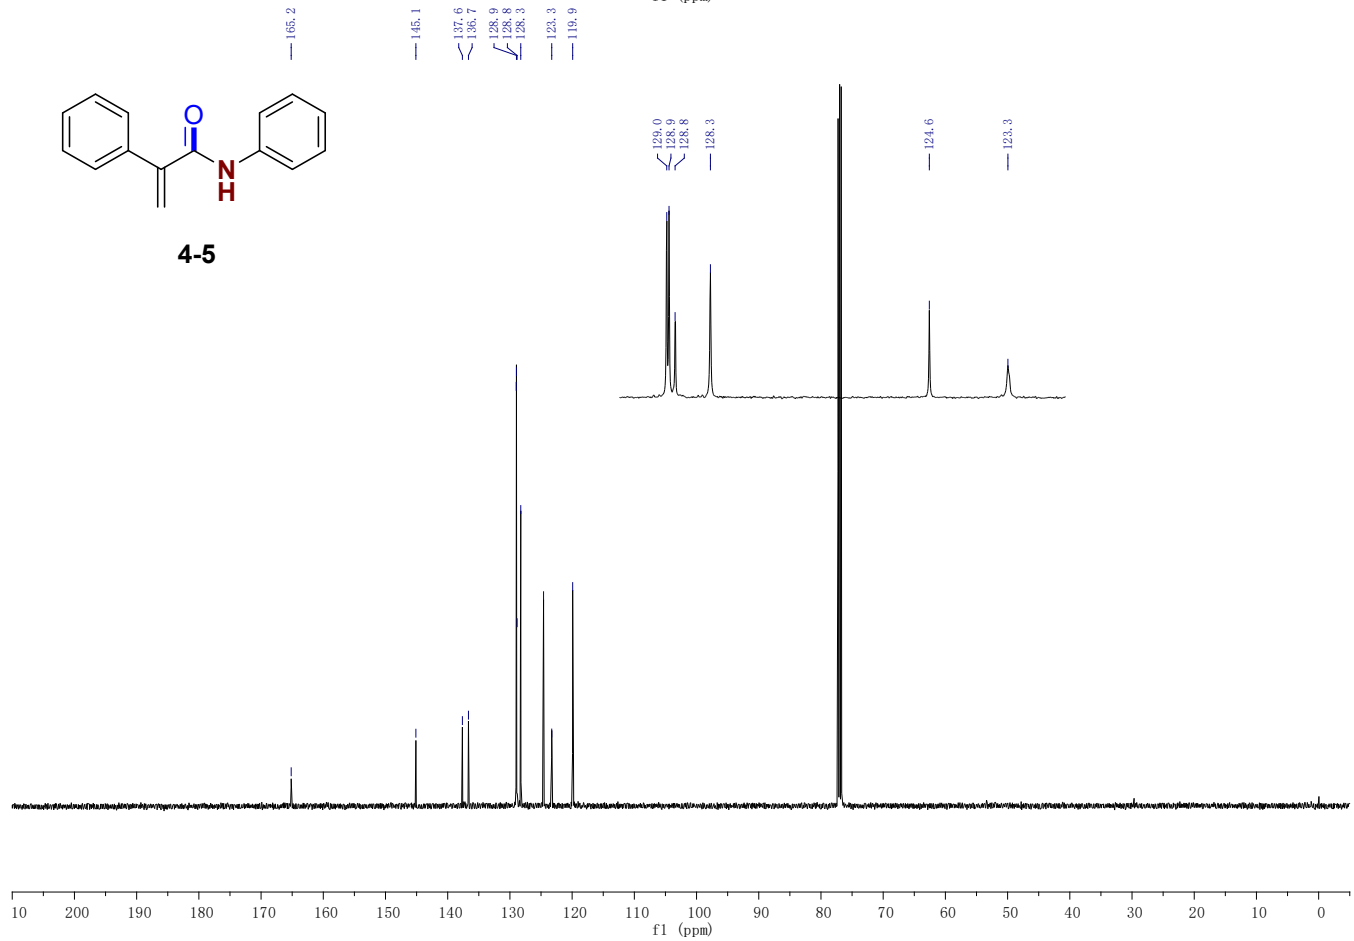

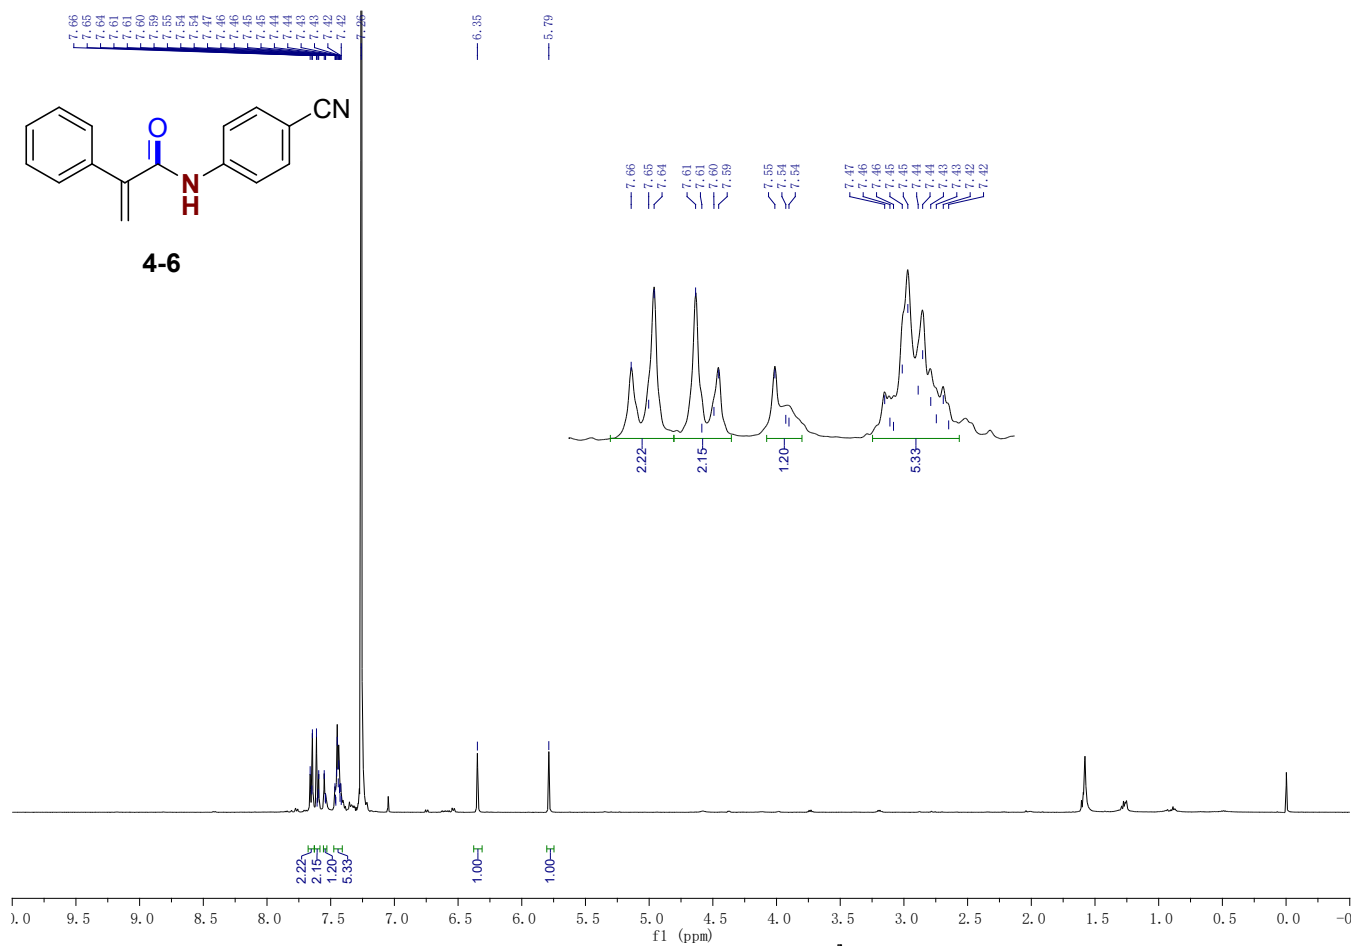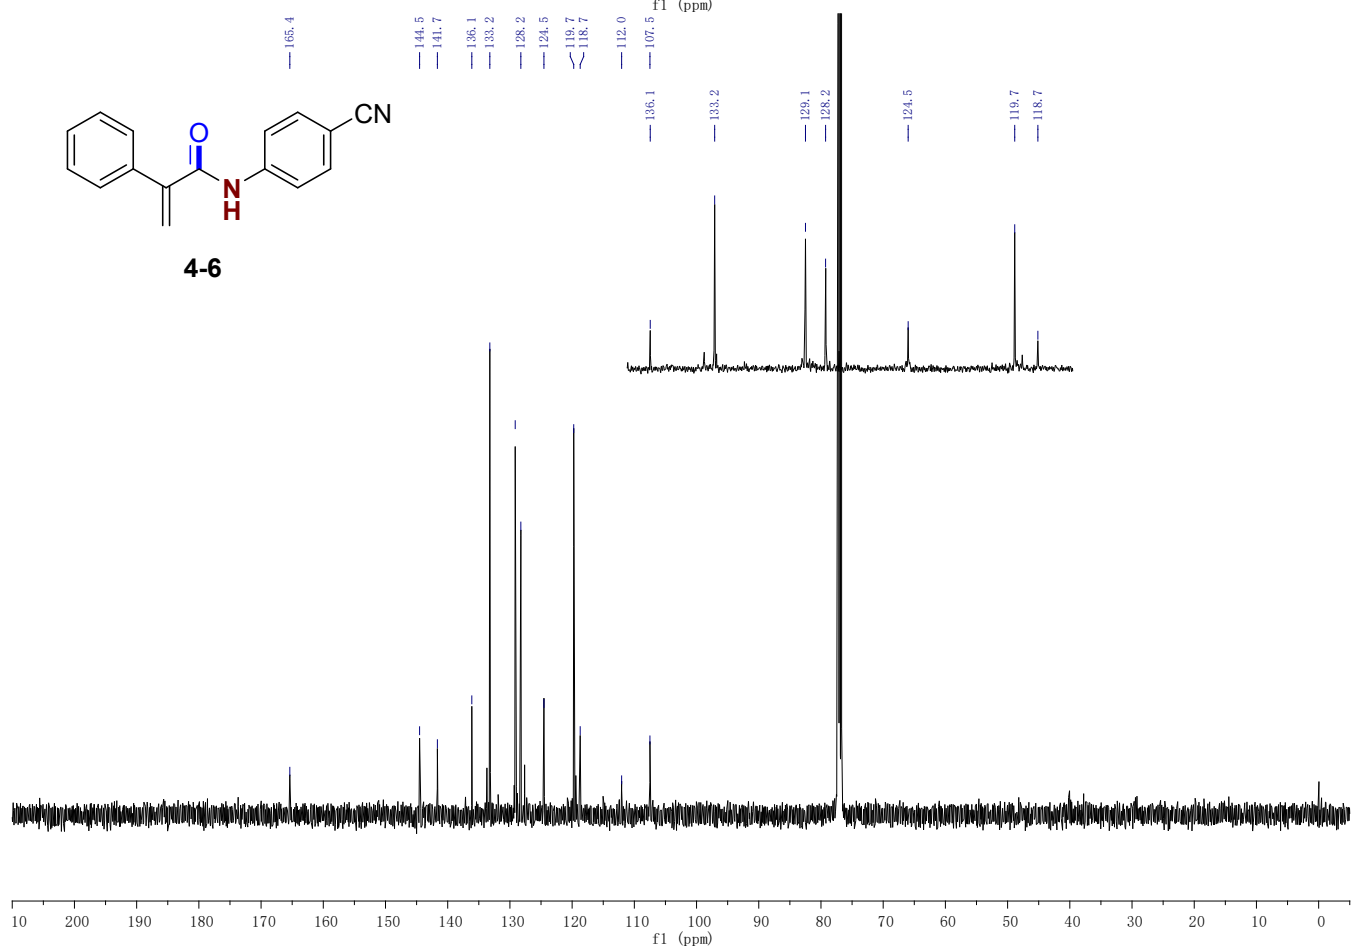

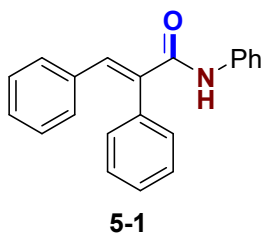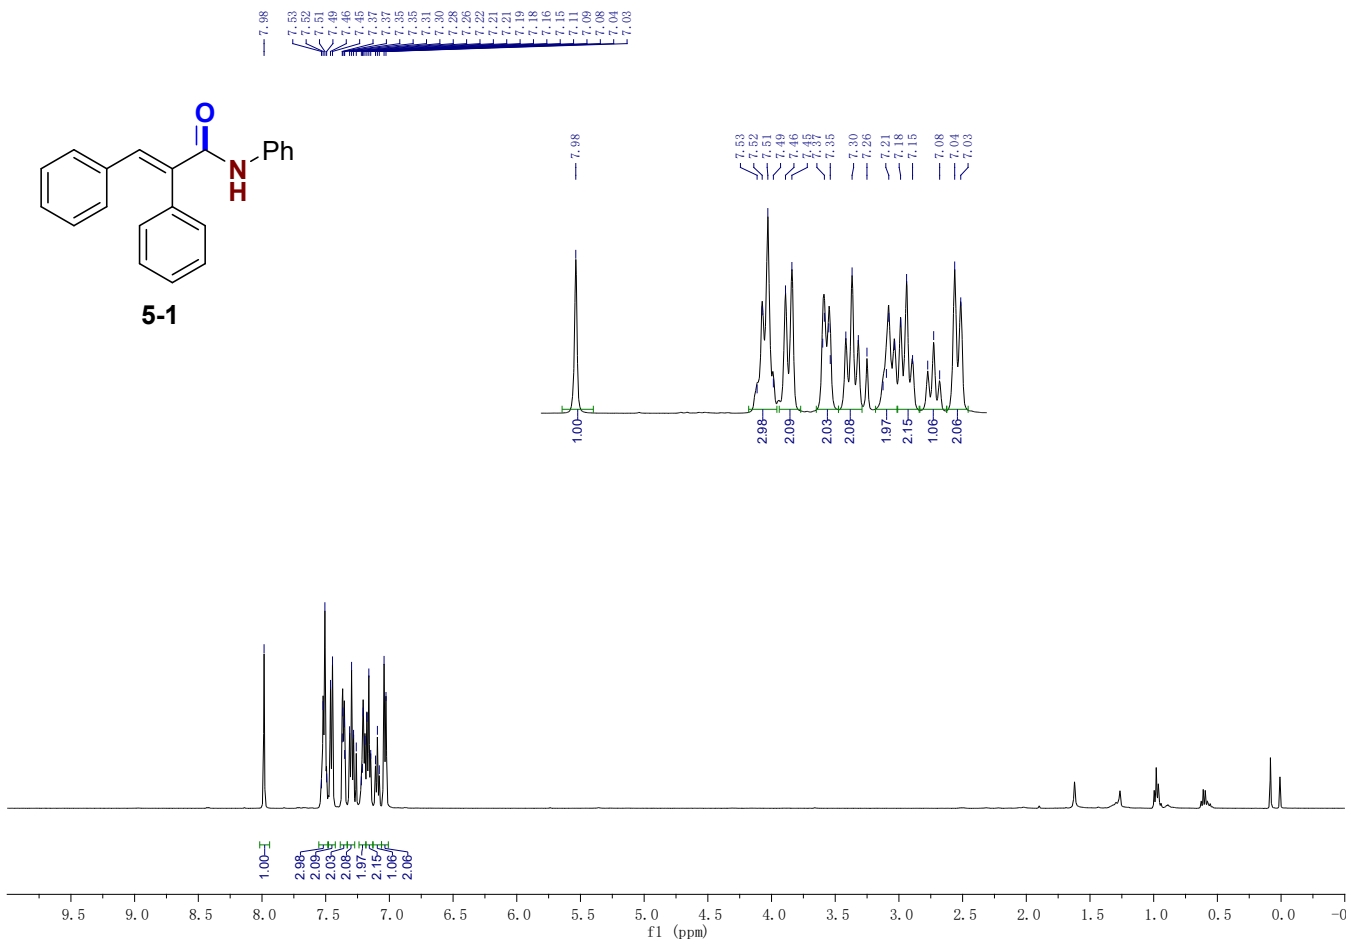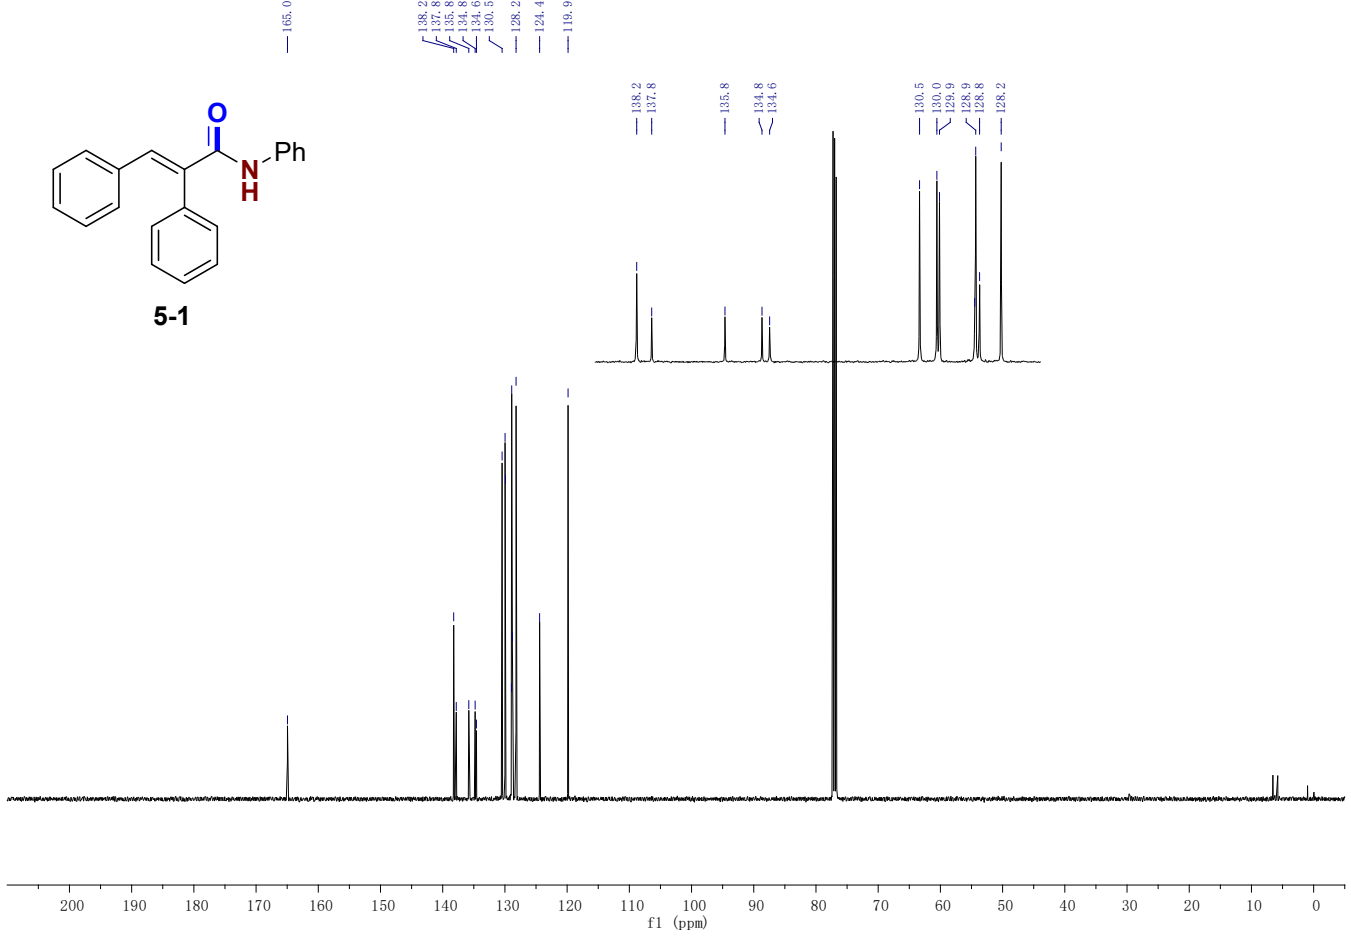



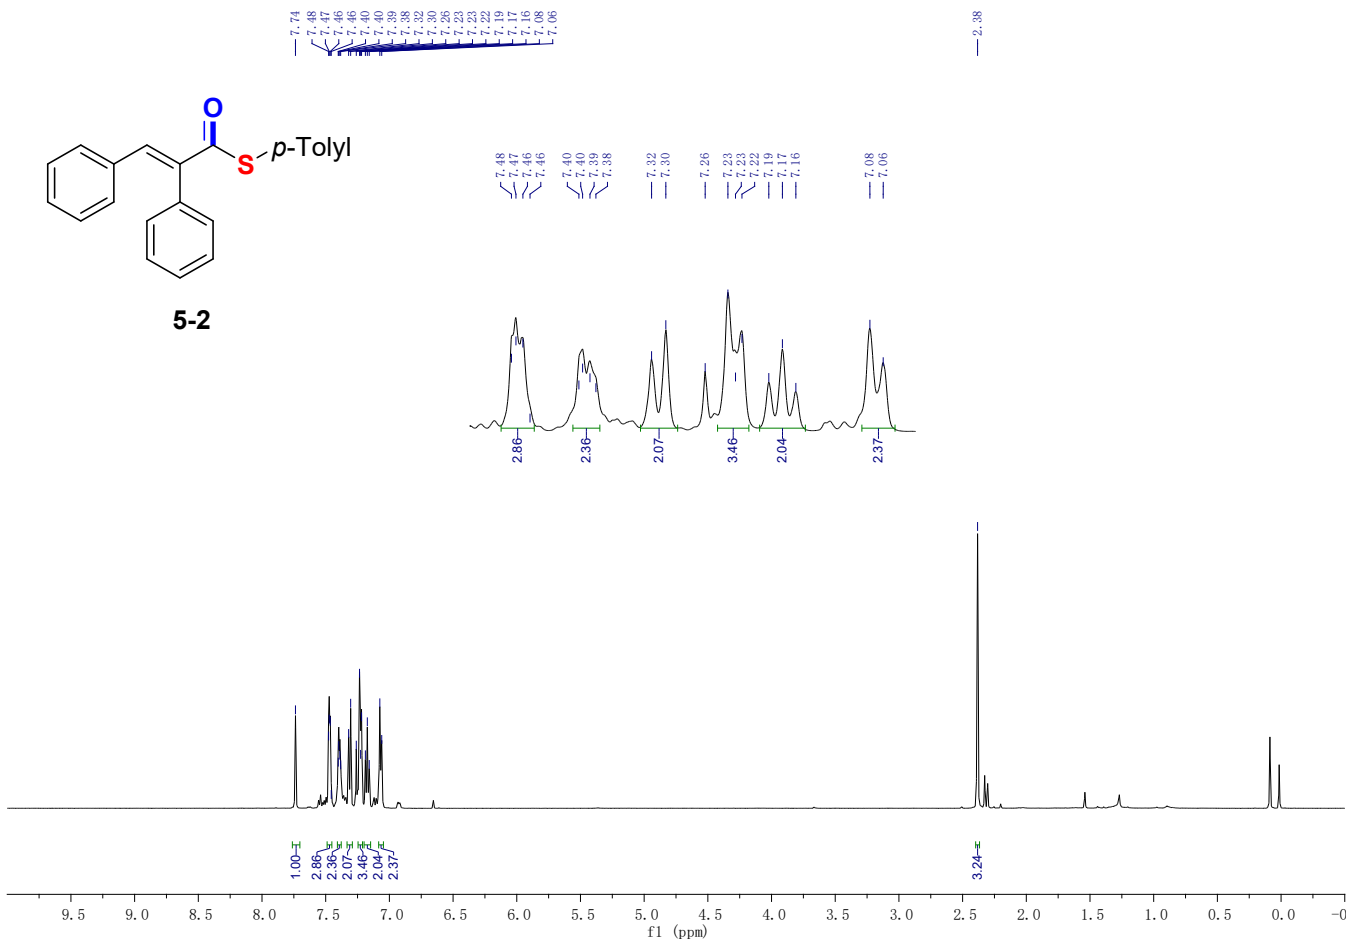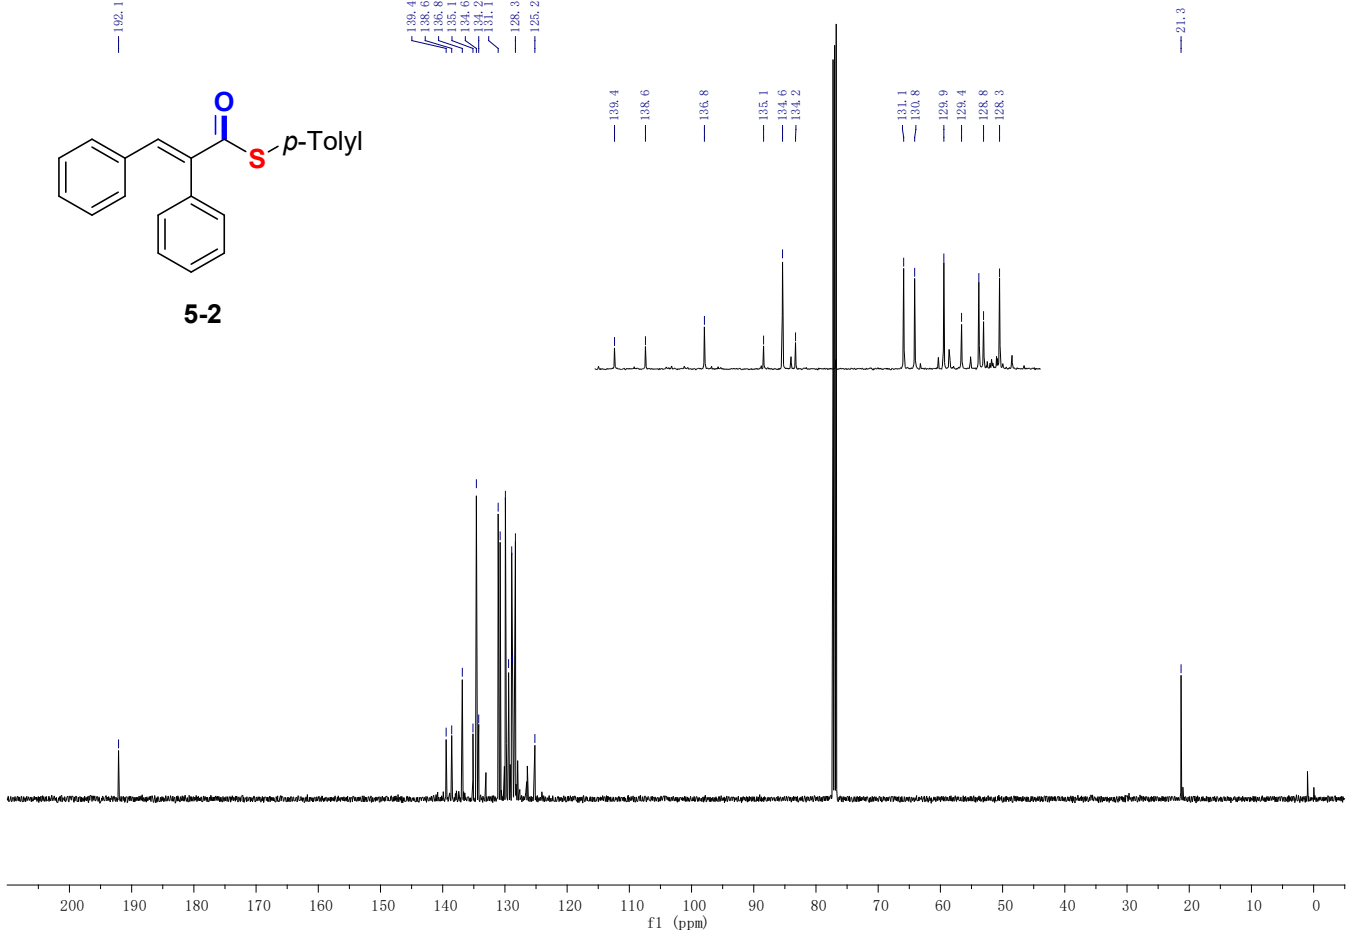

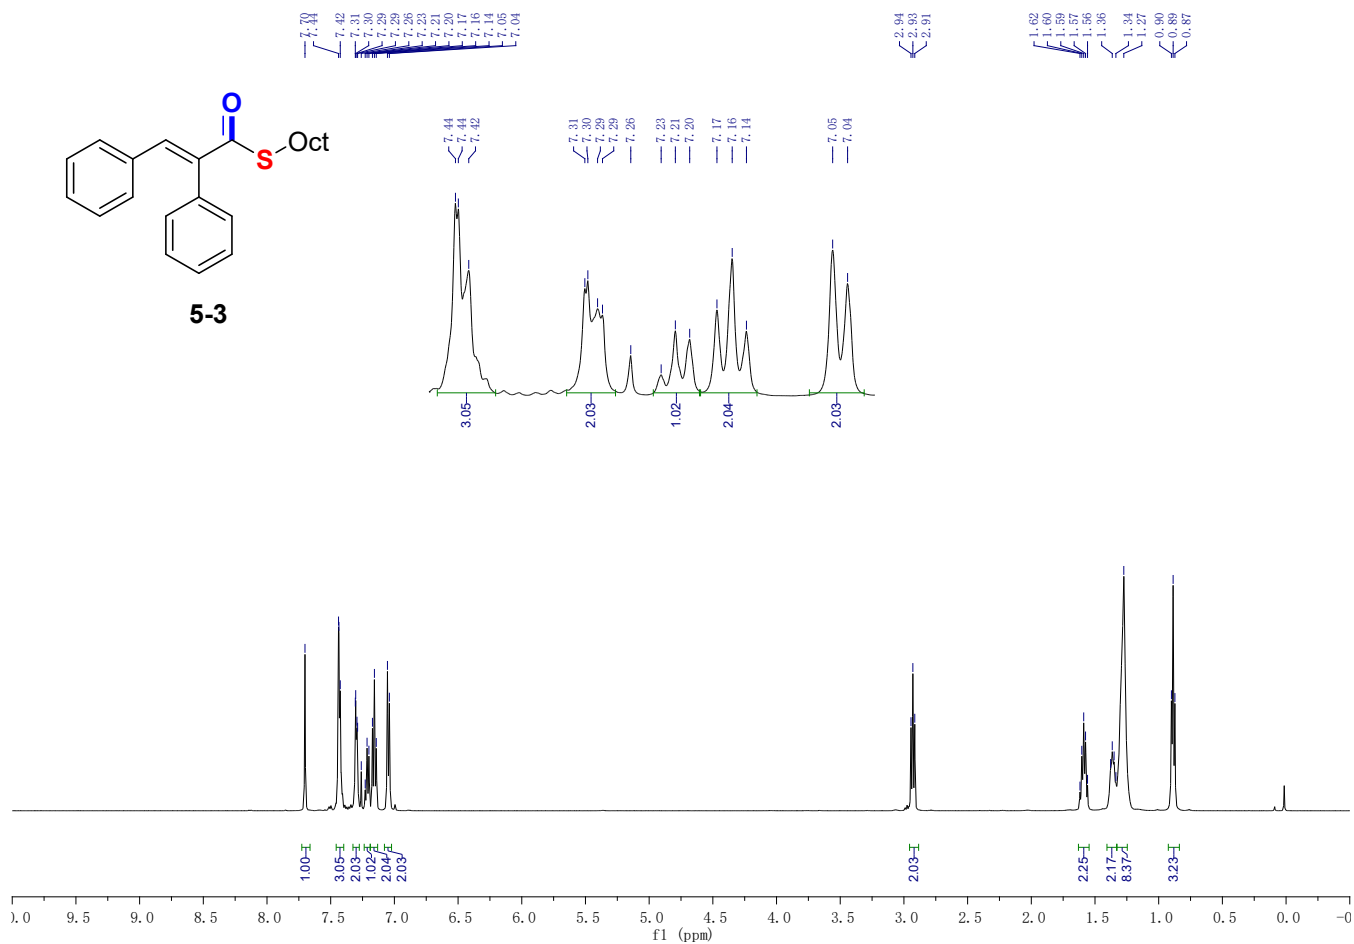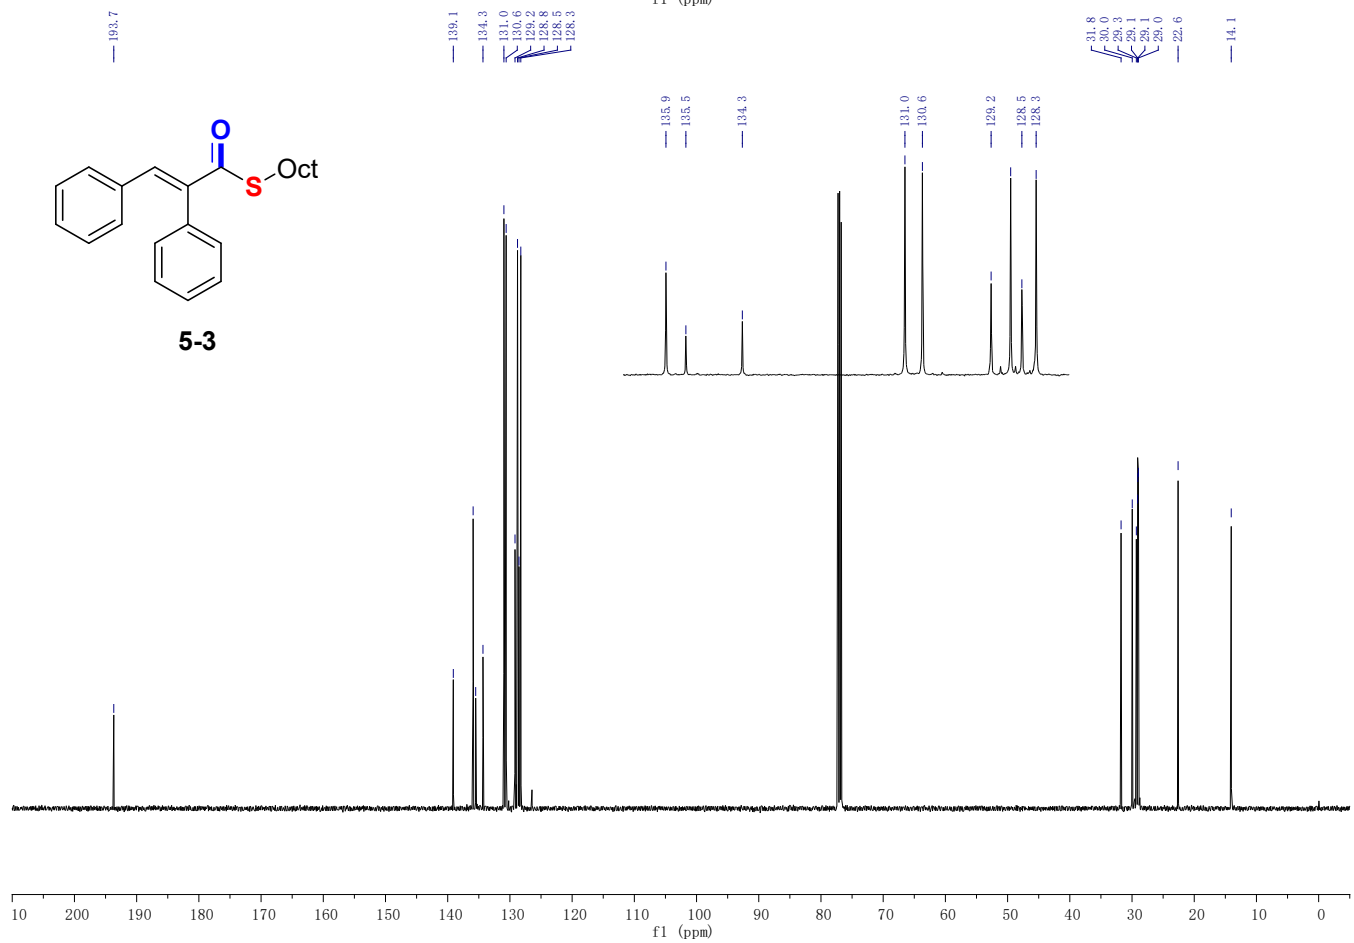

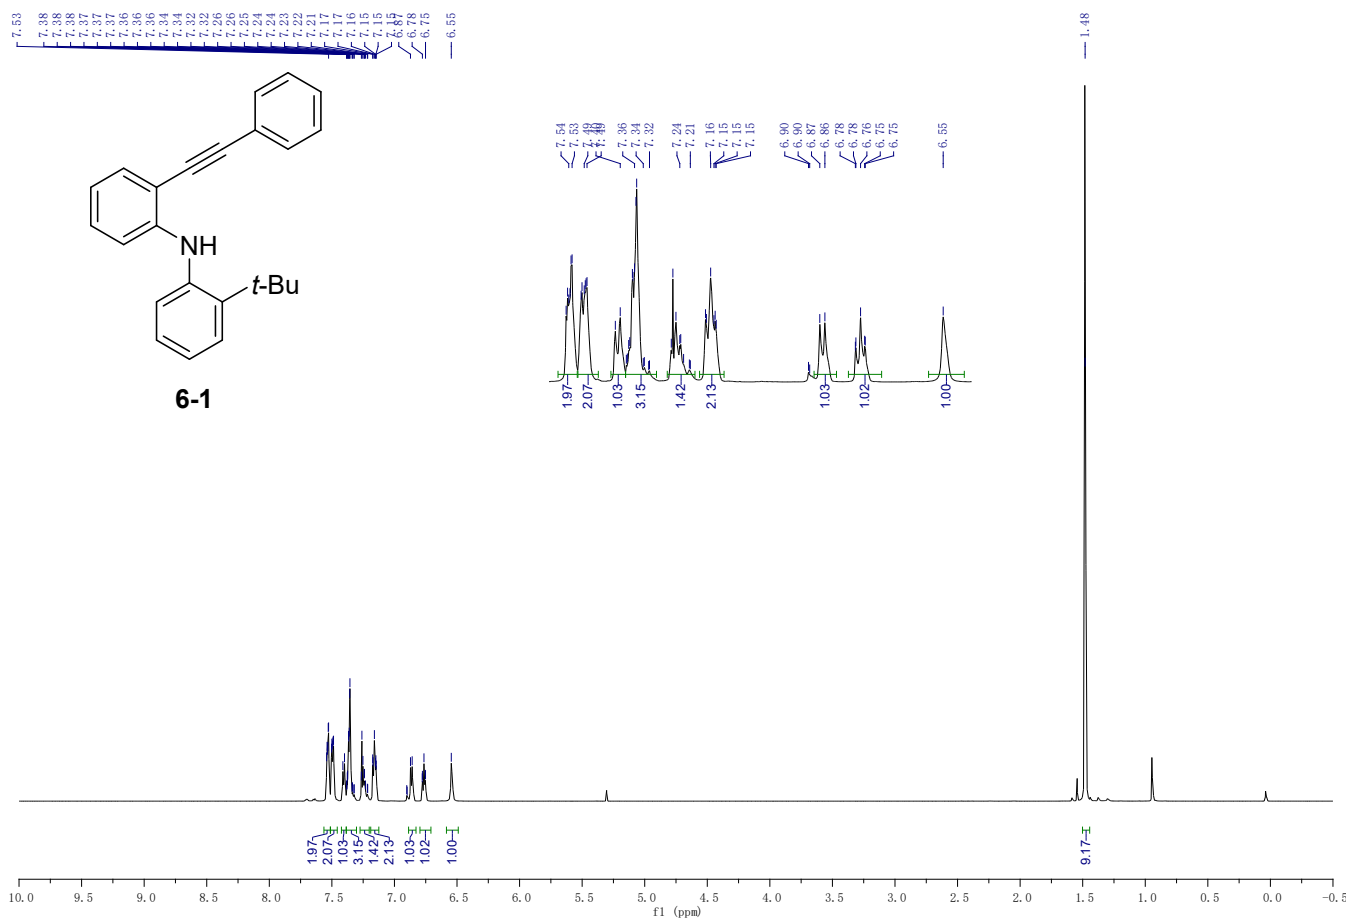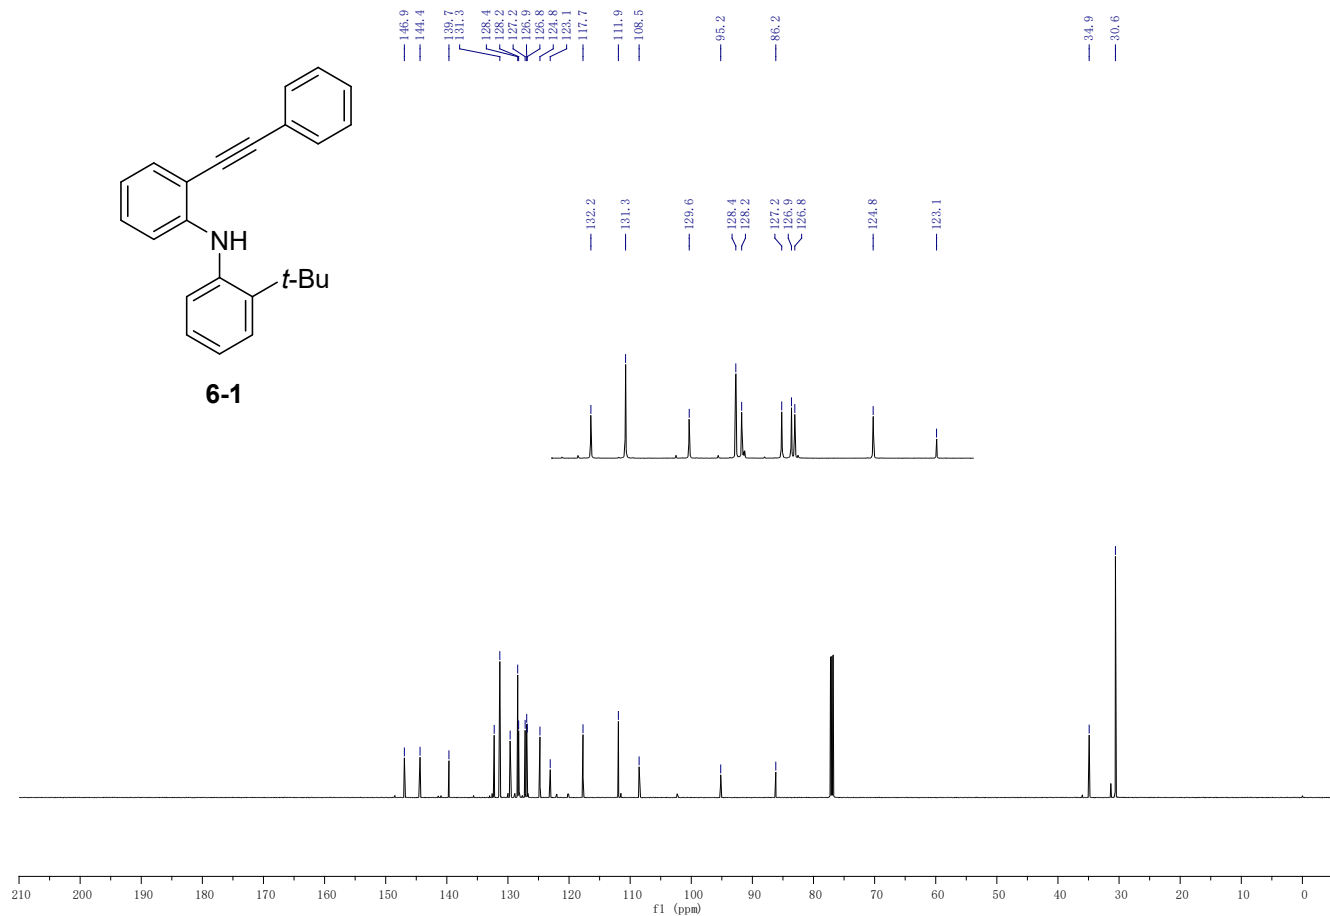

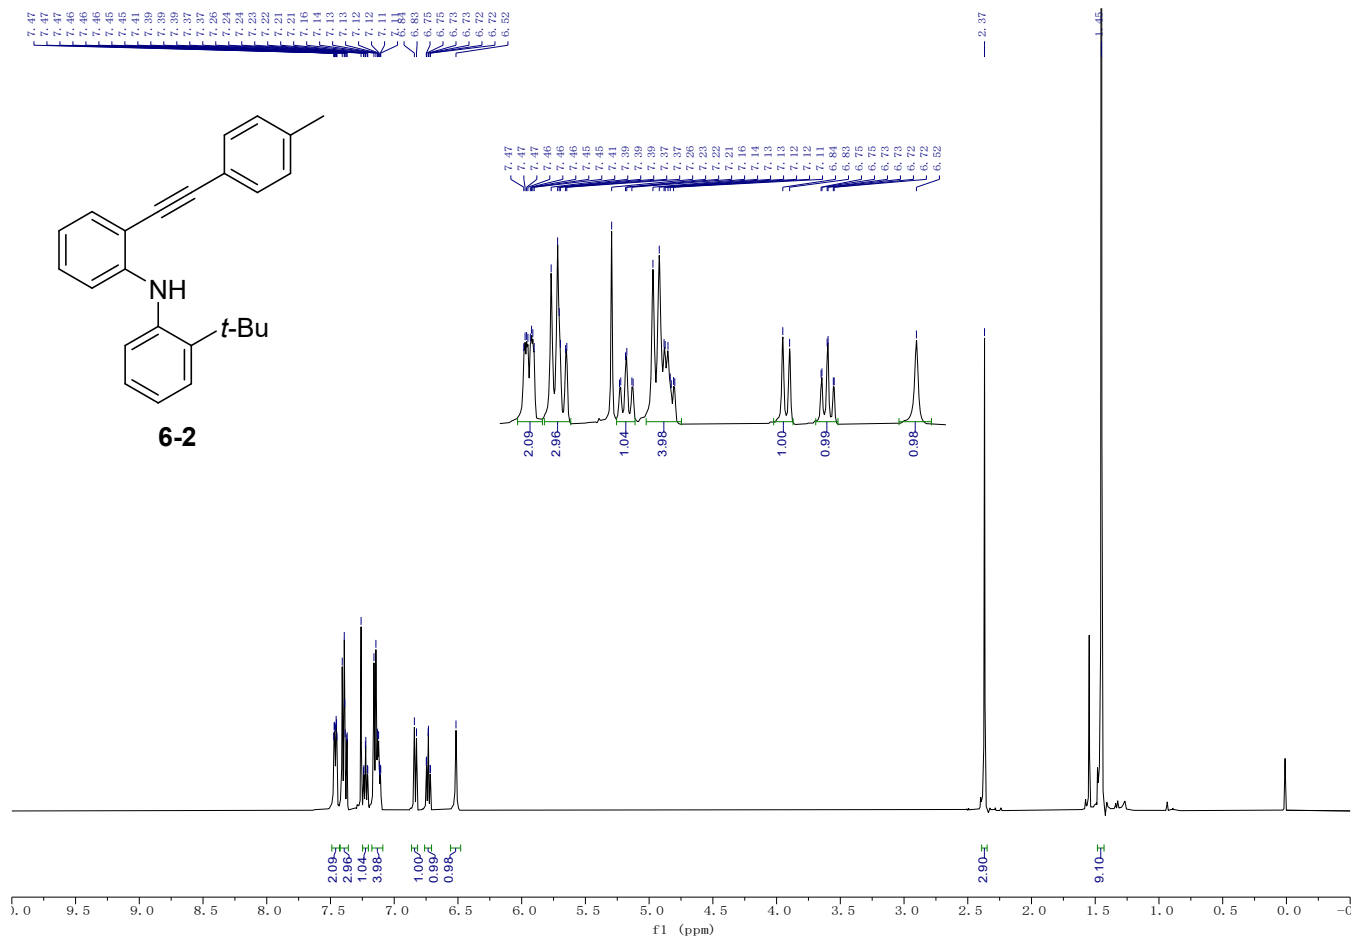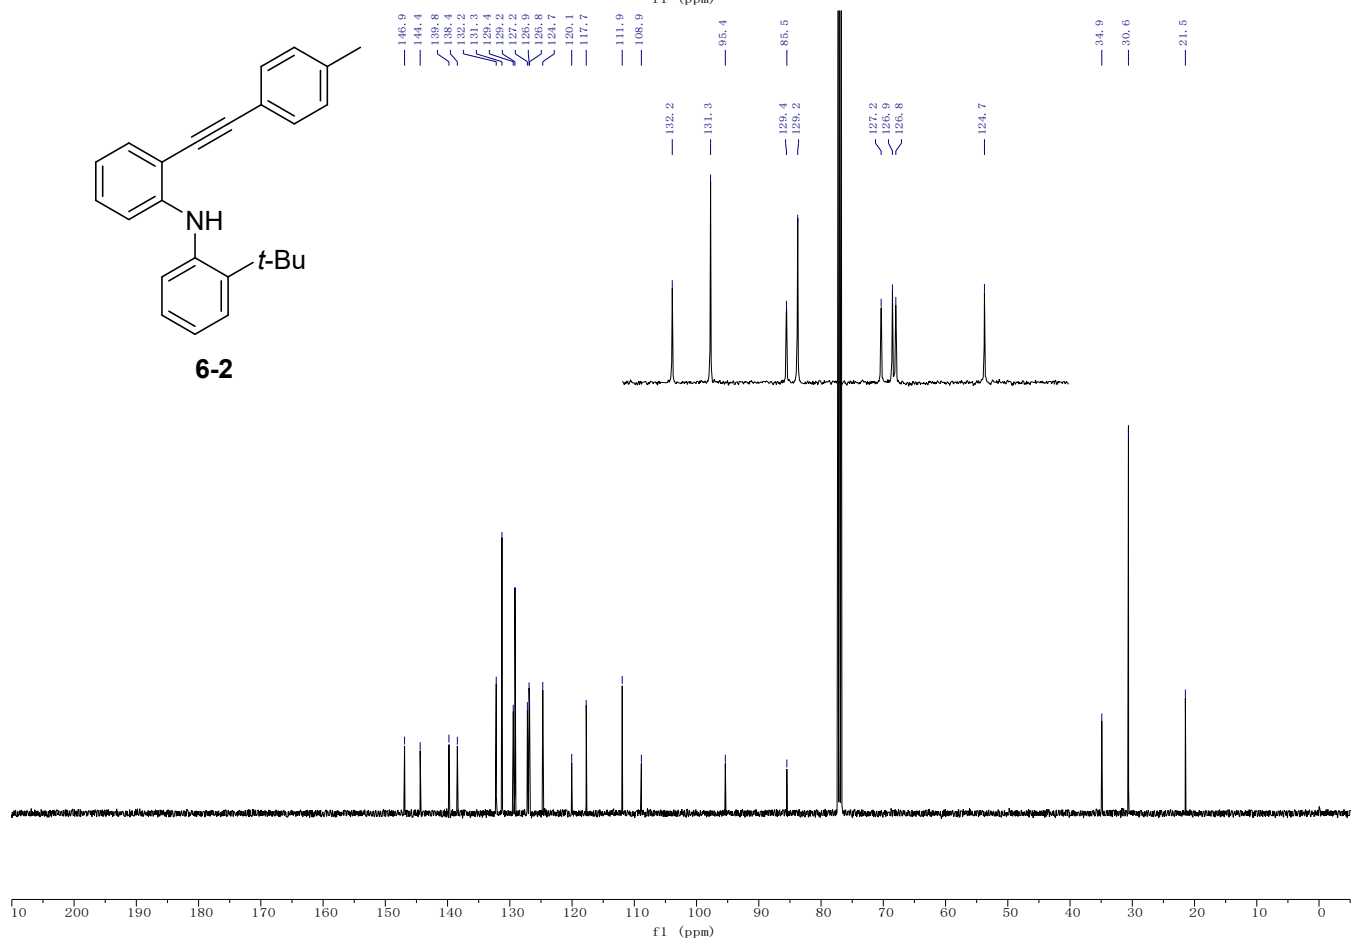

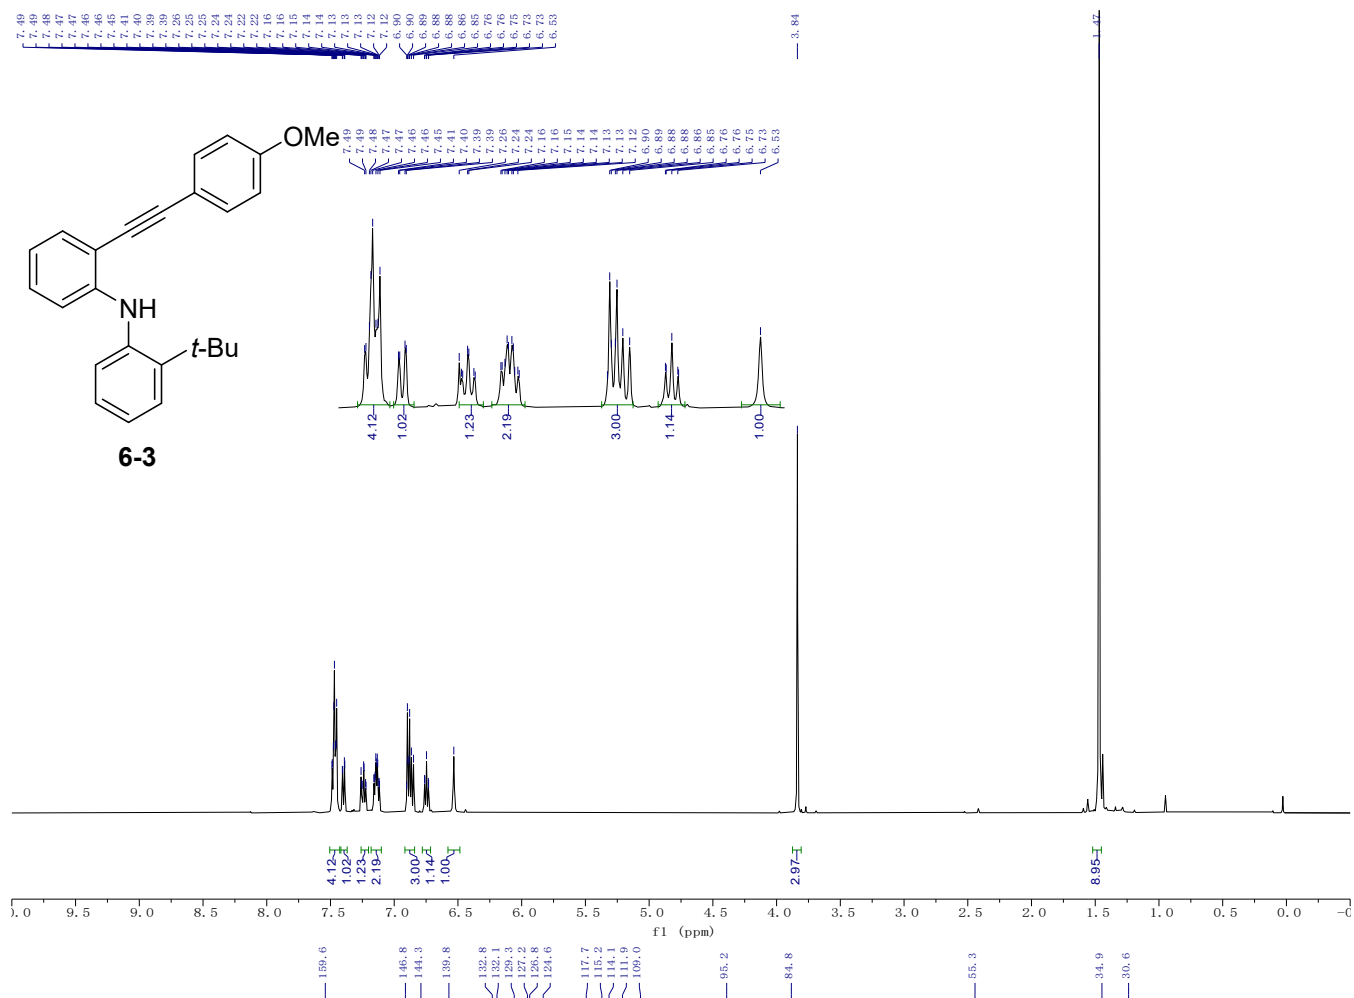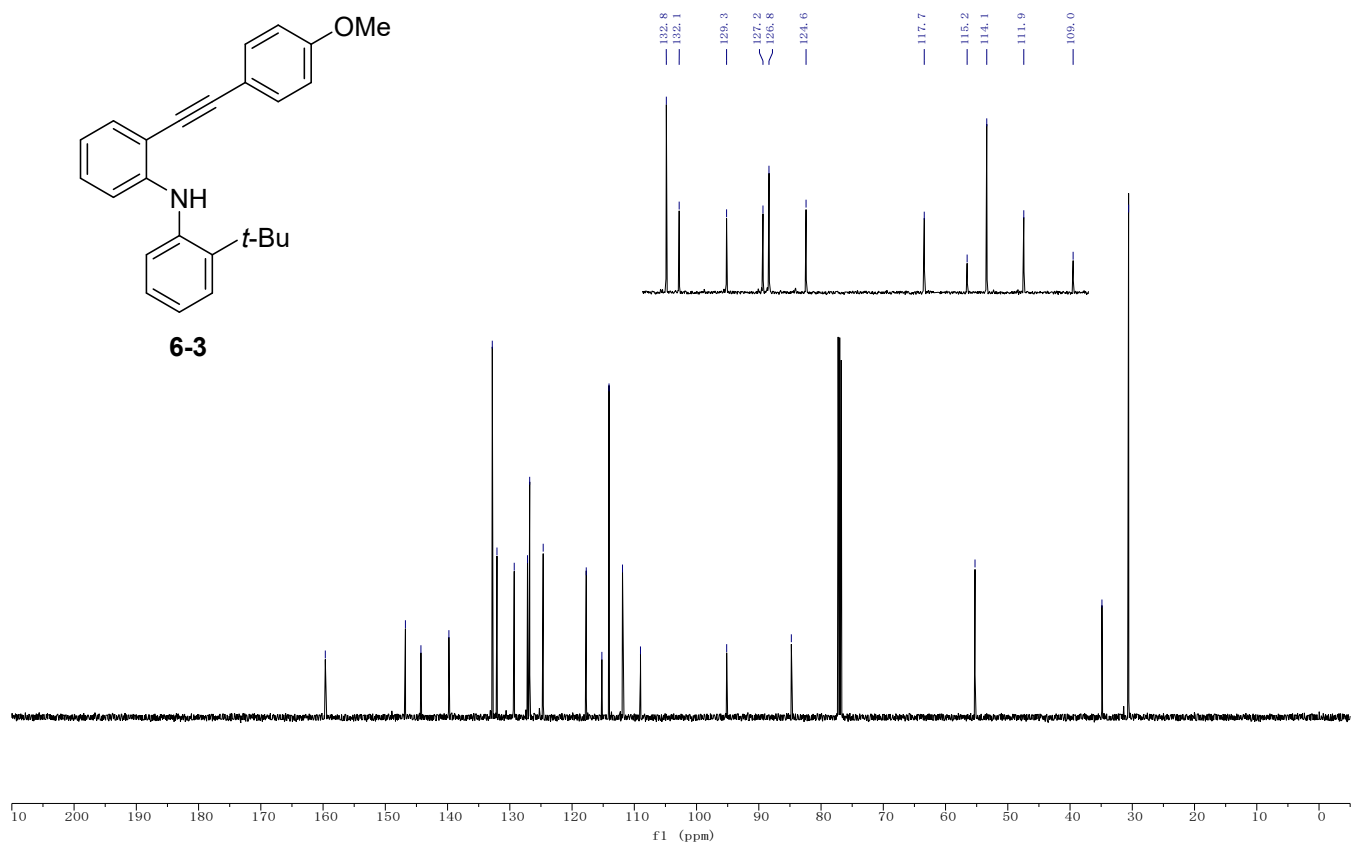

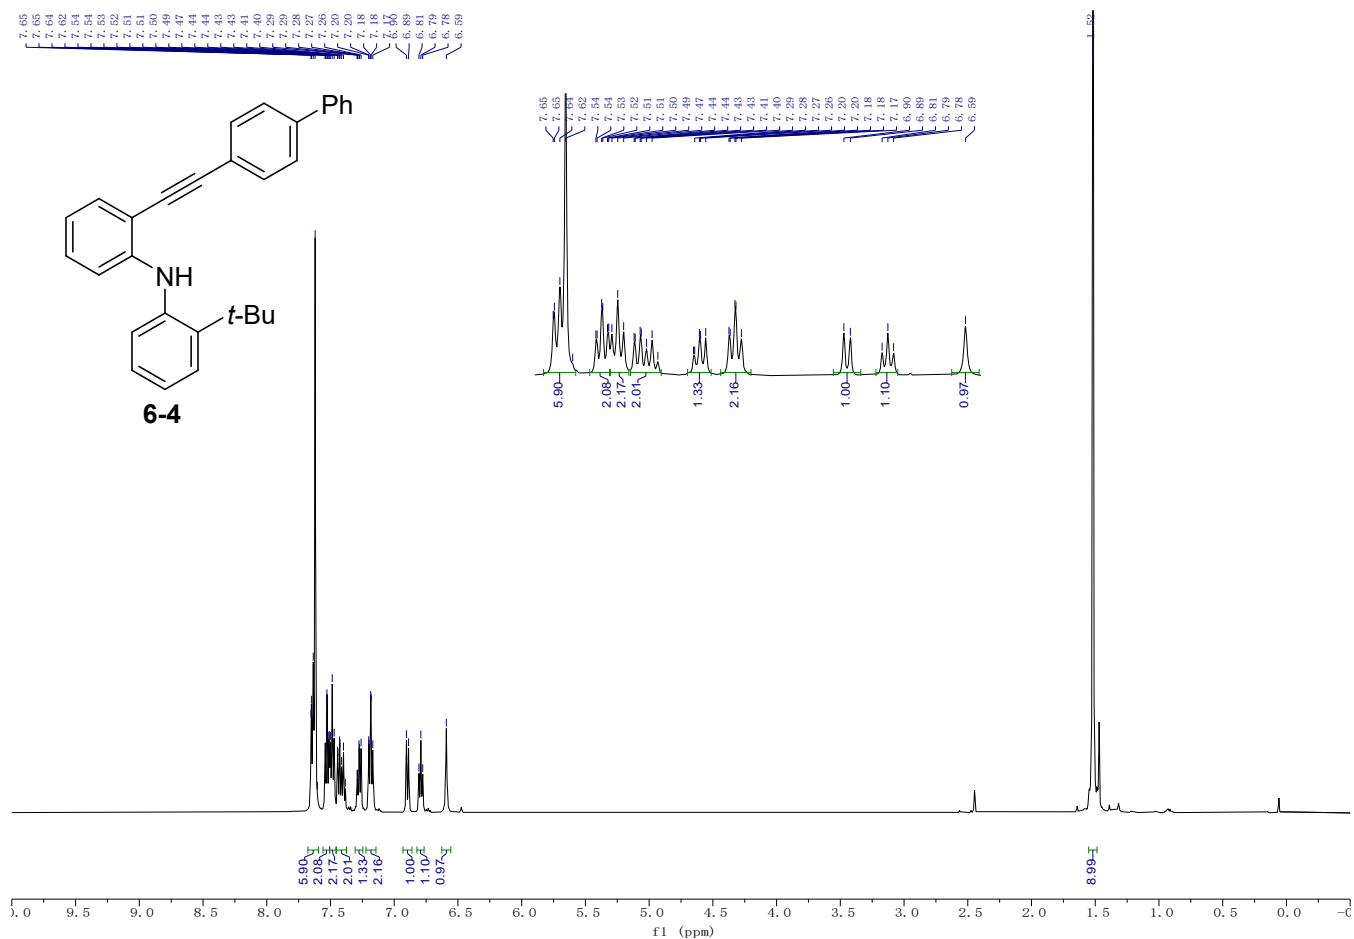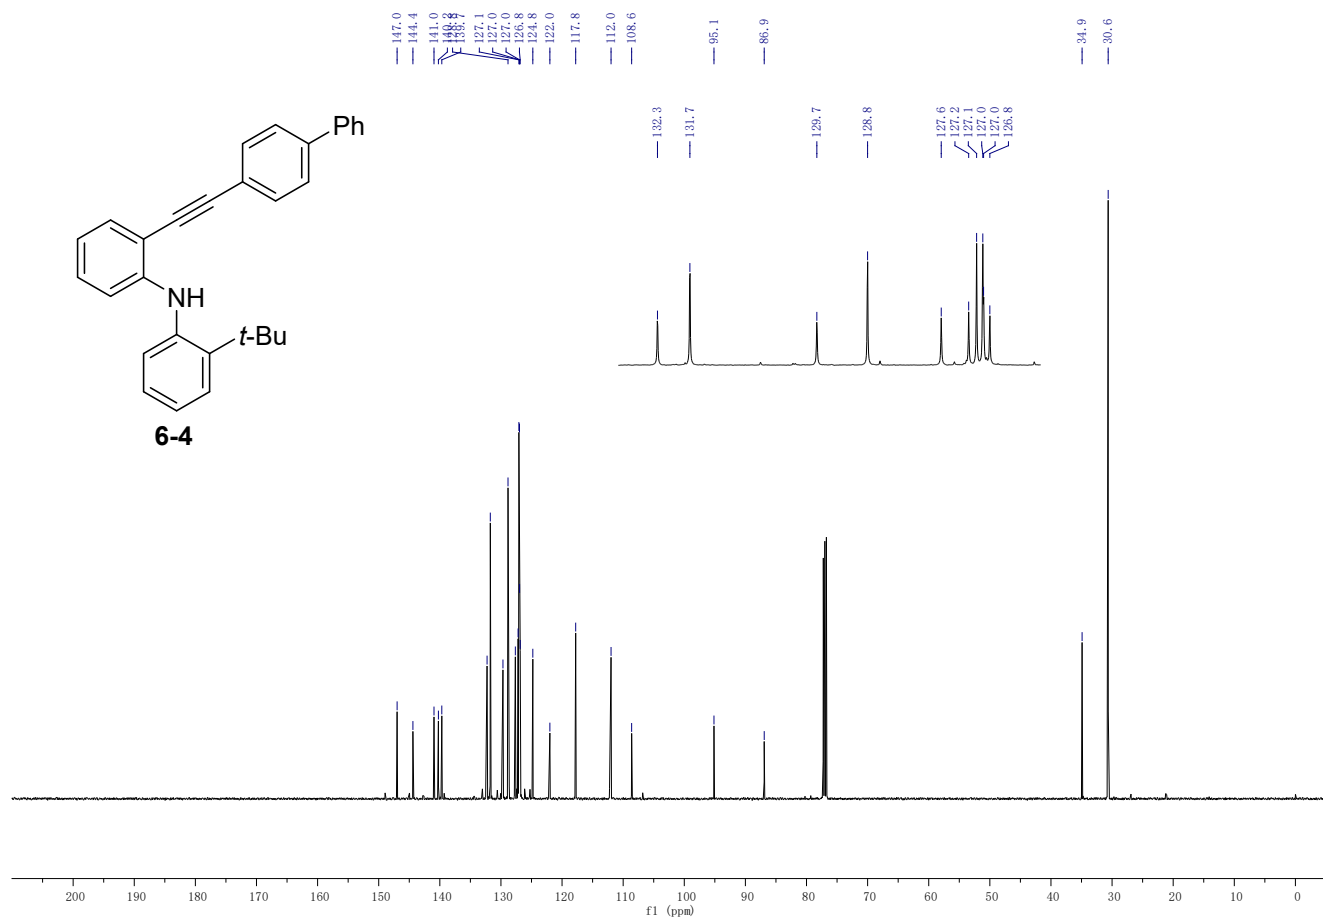

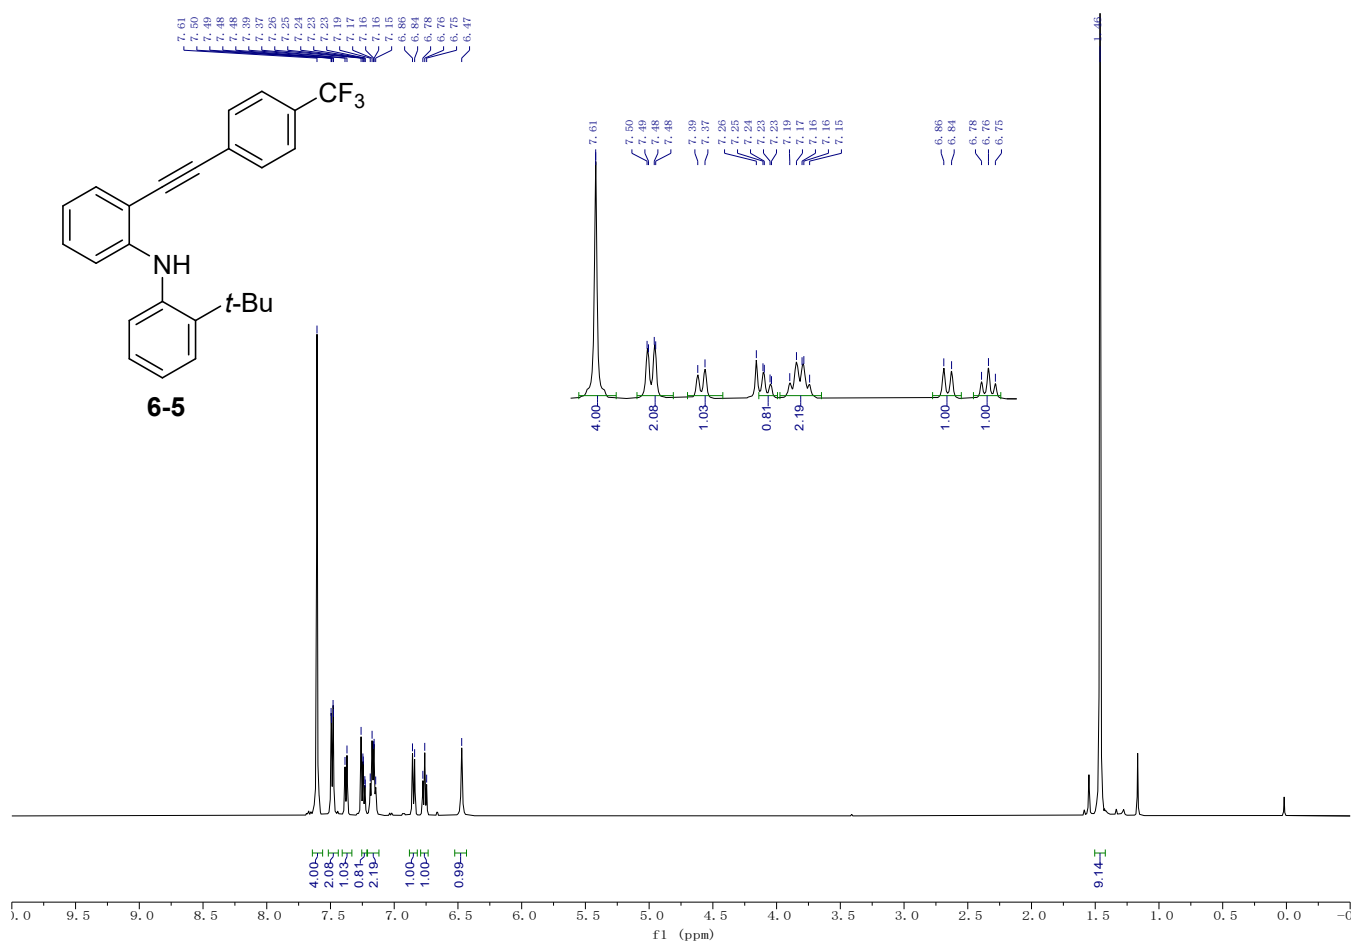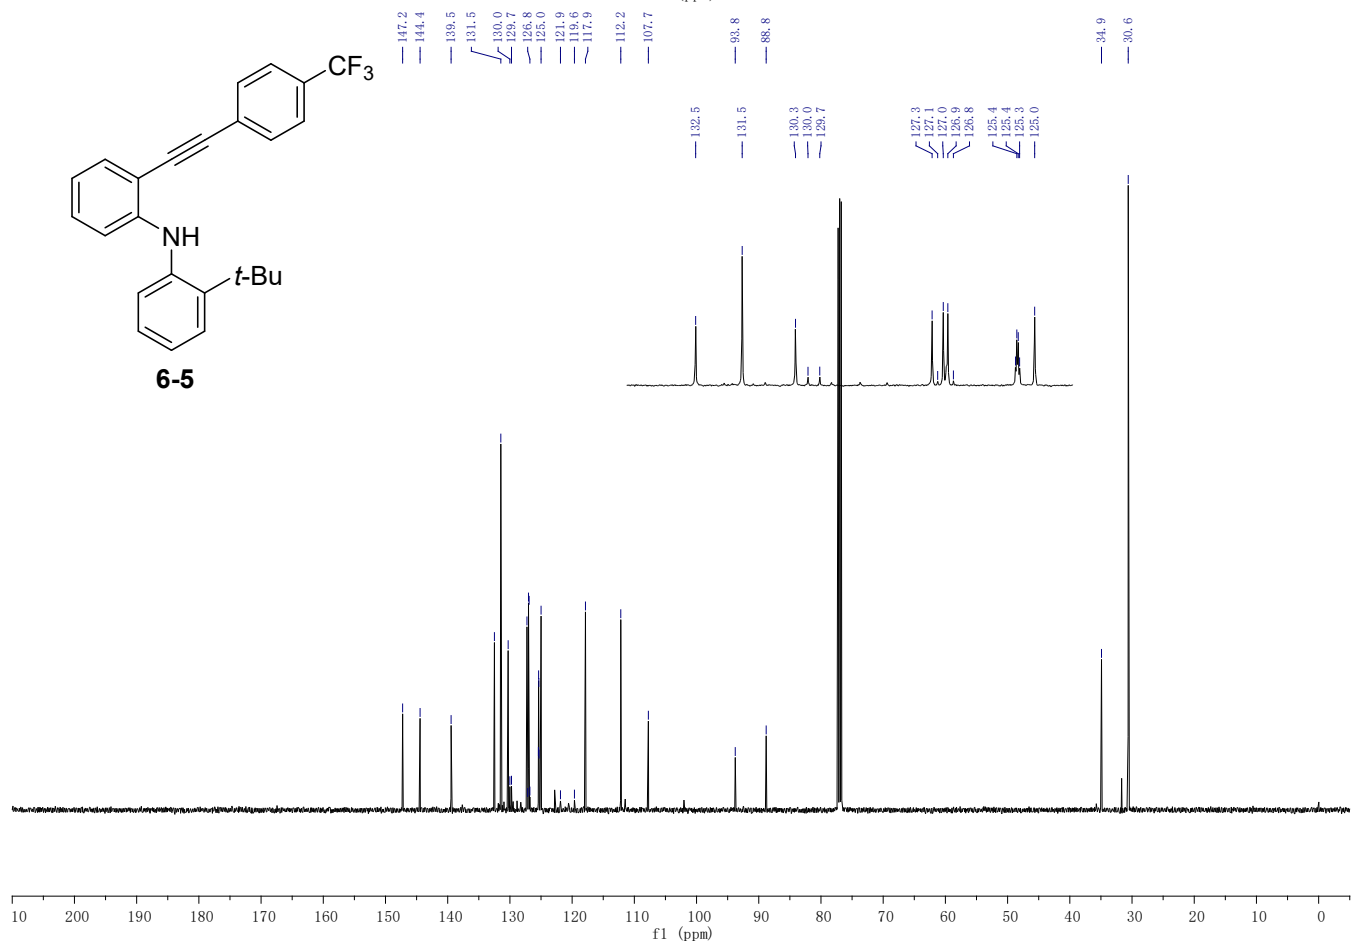

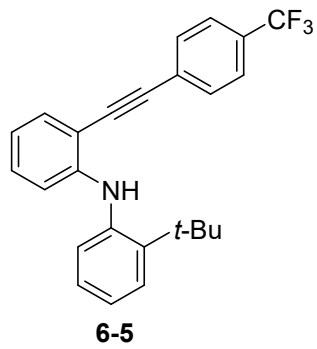

62.8

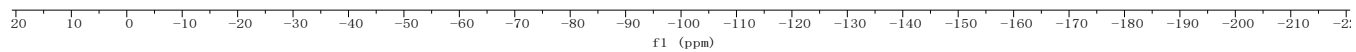



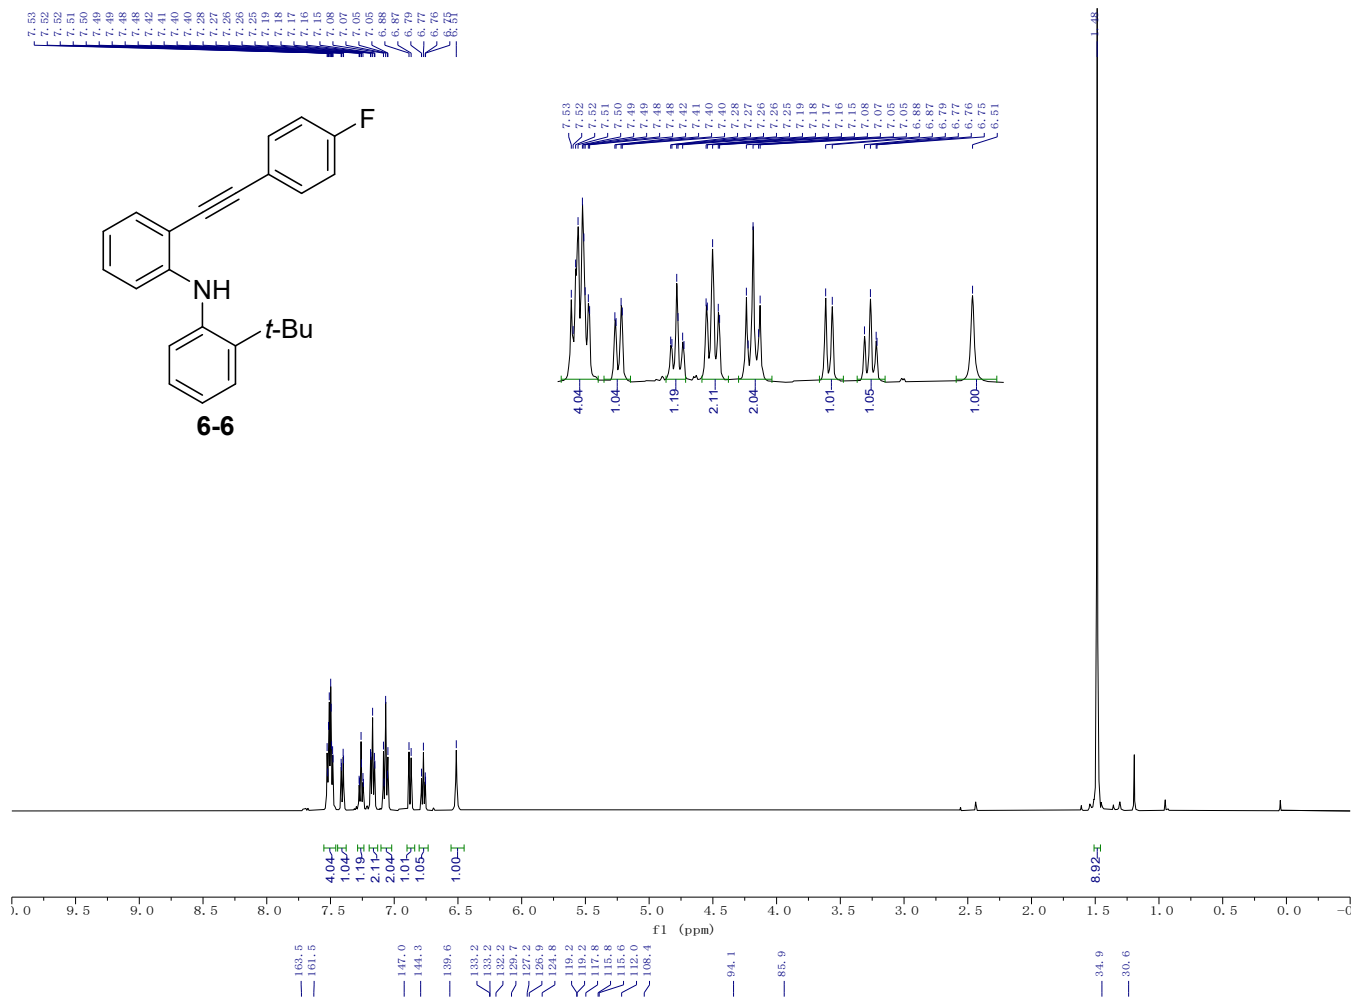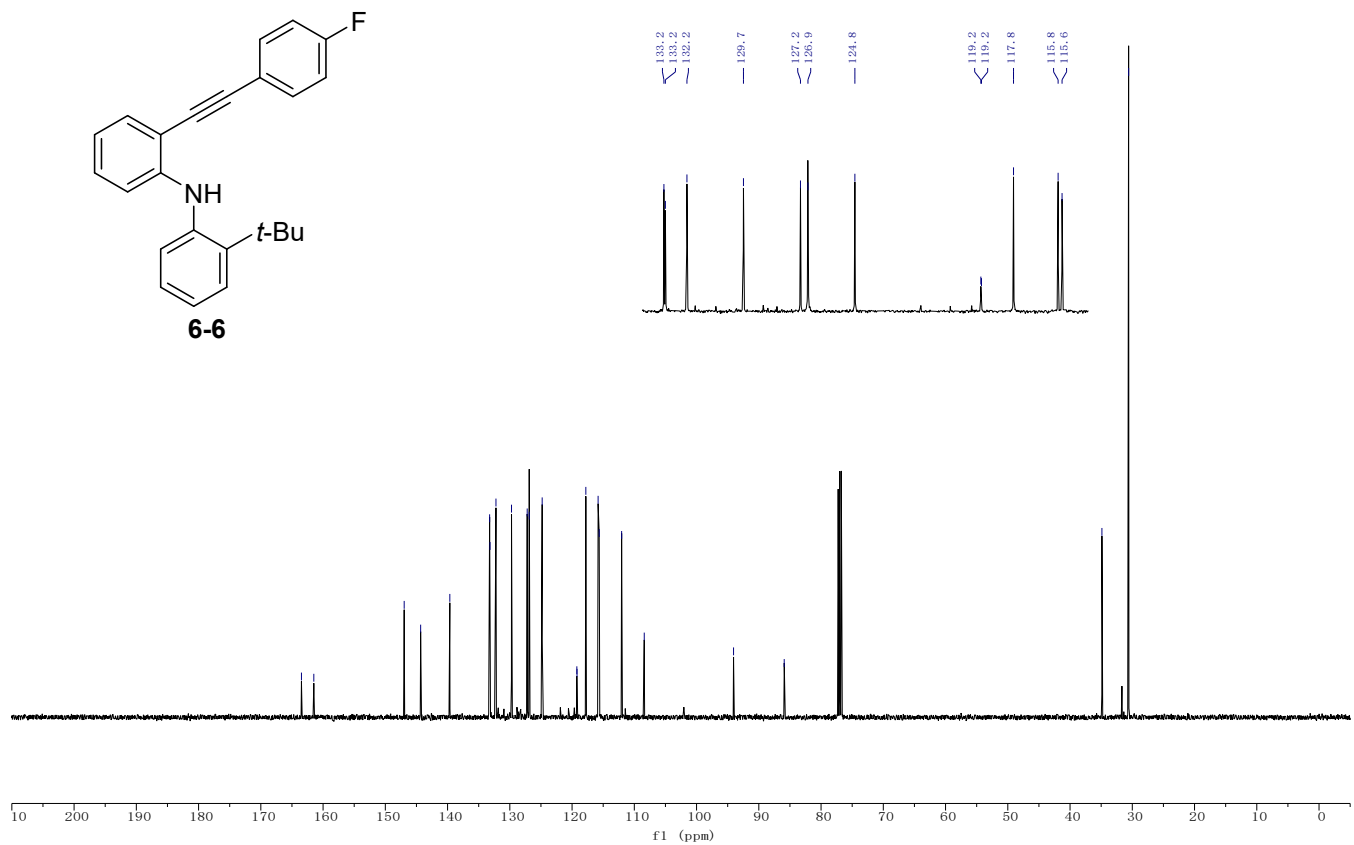

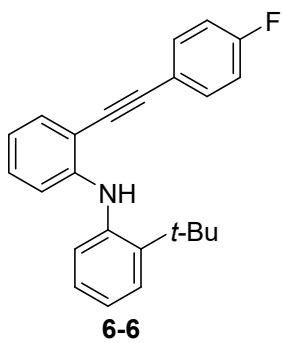

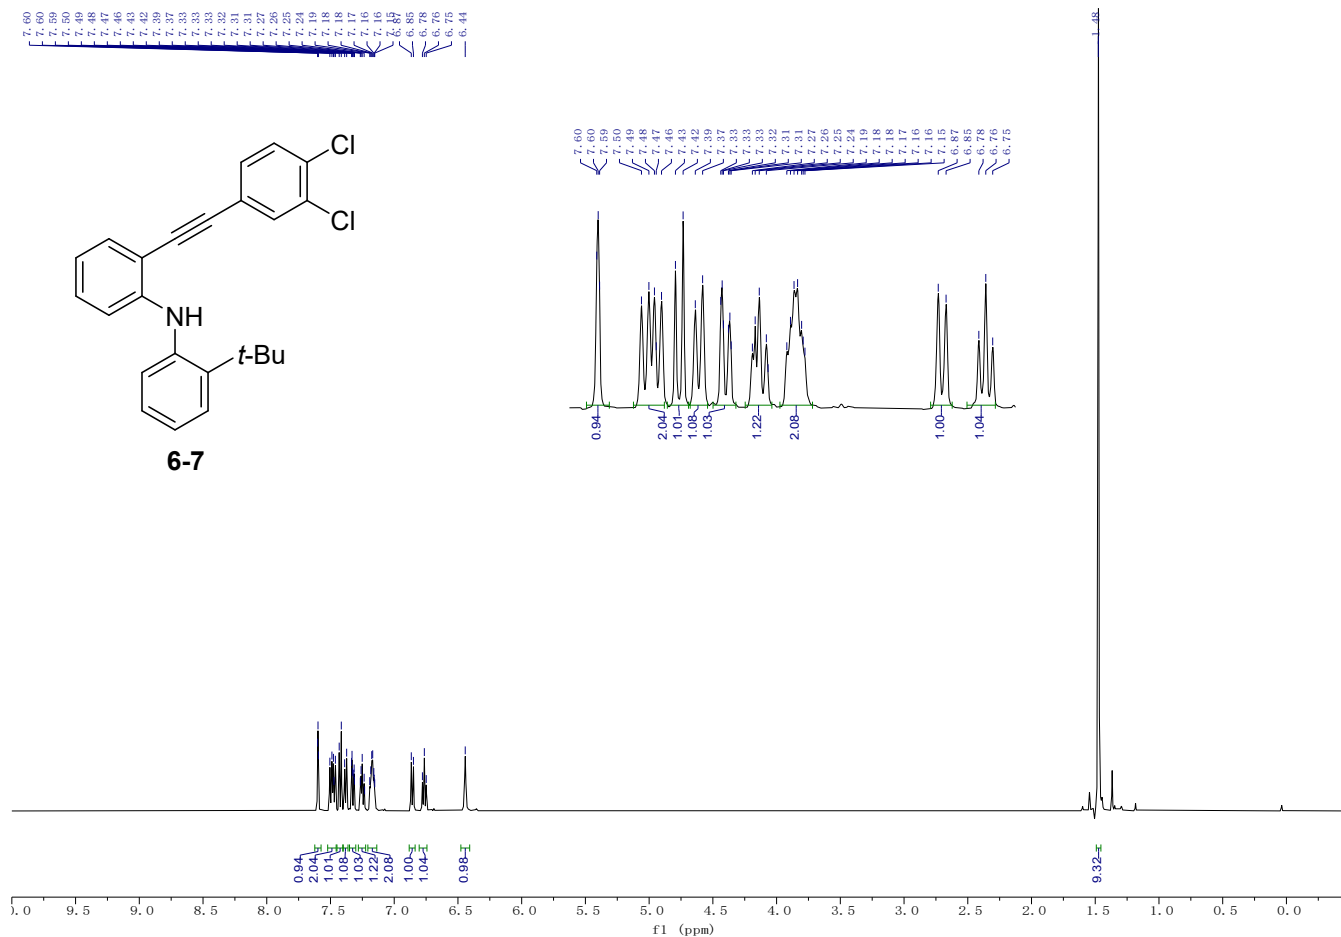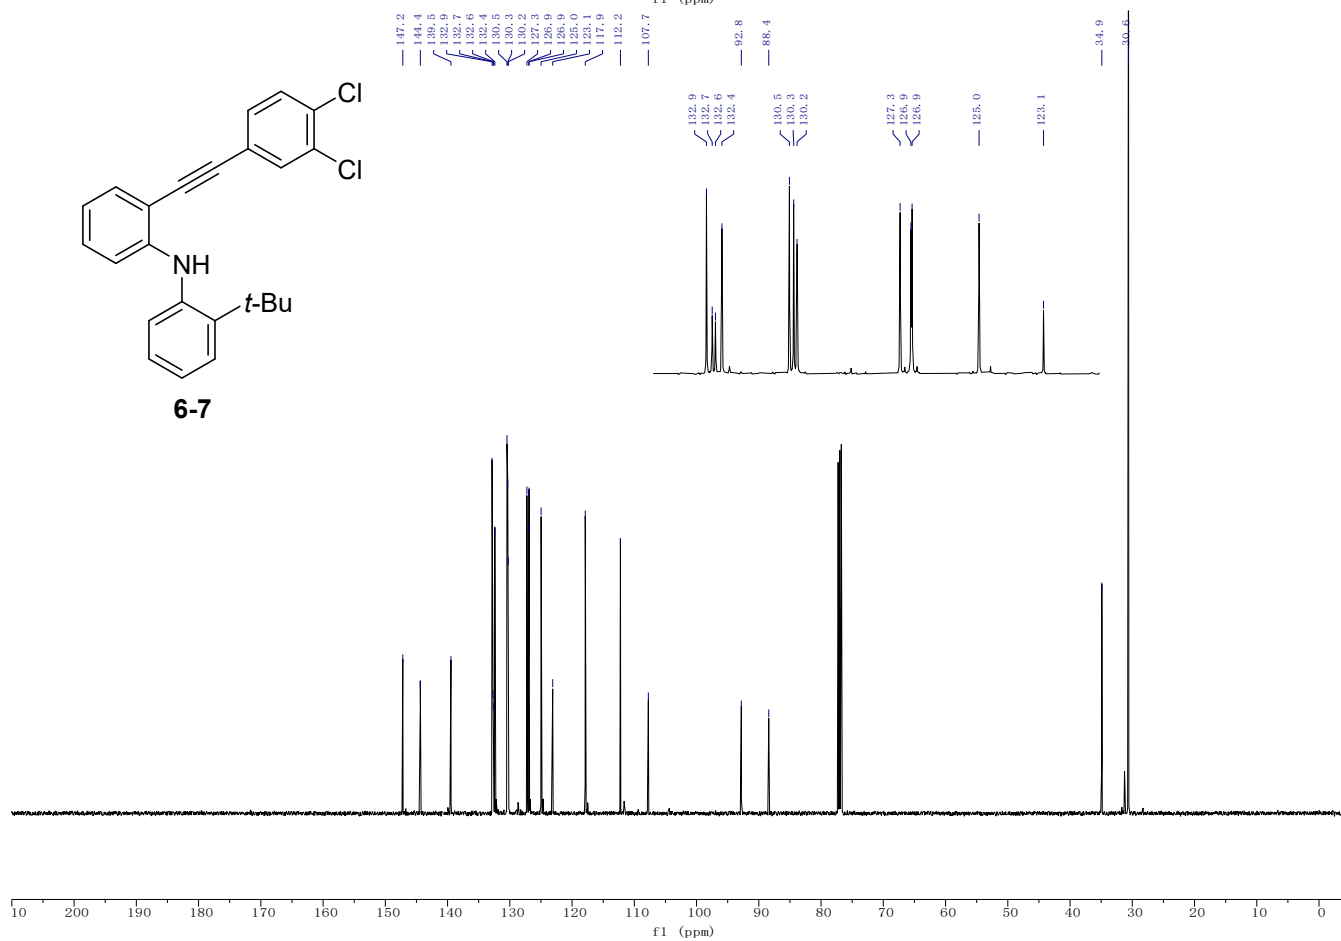

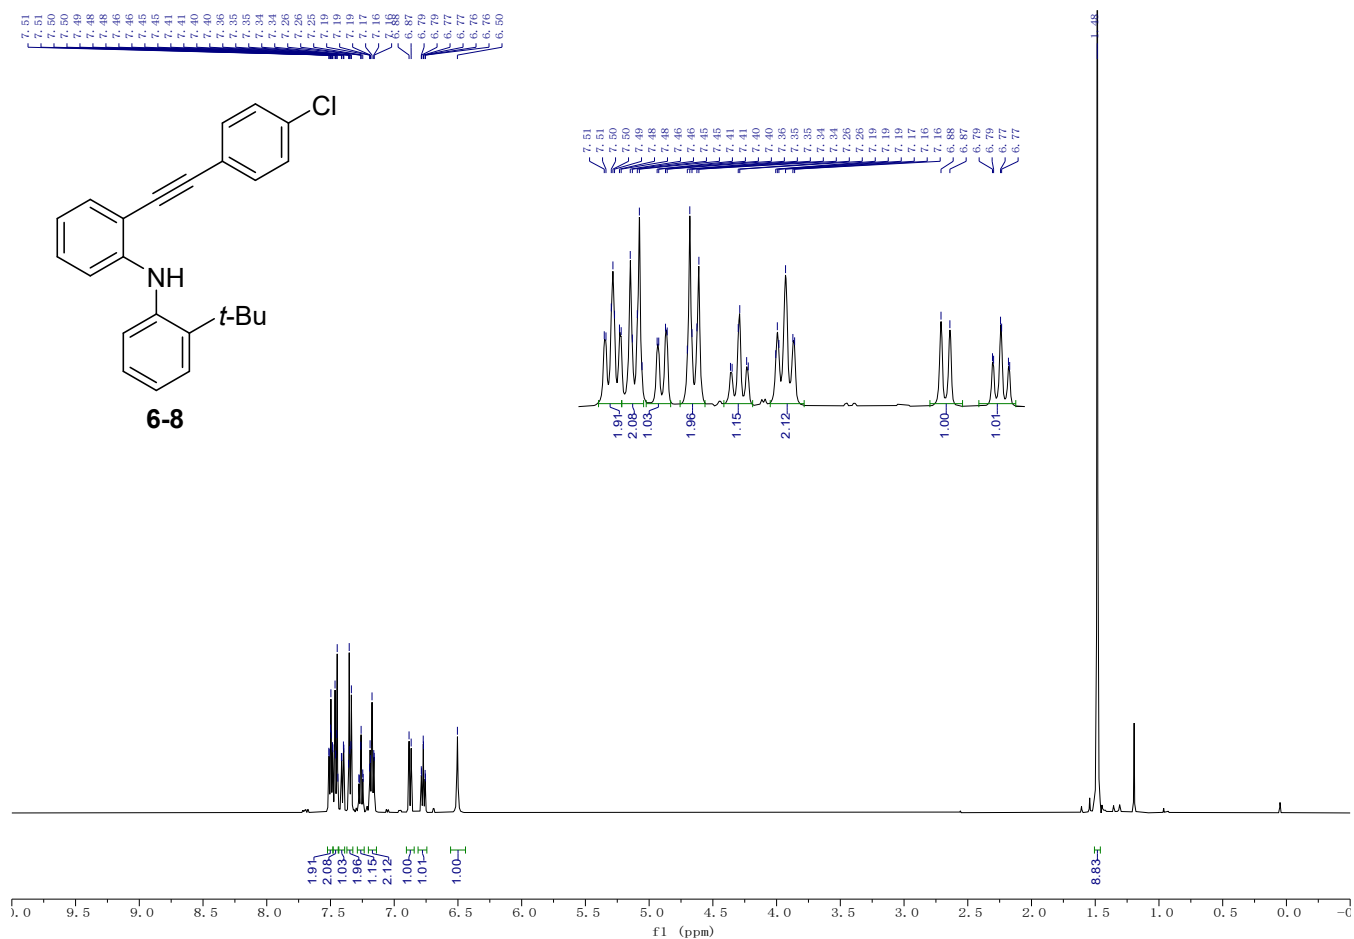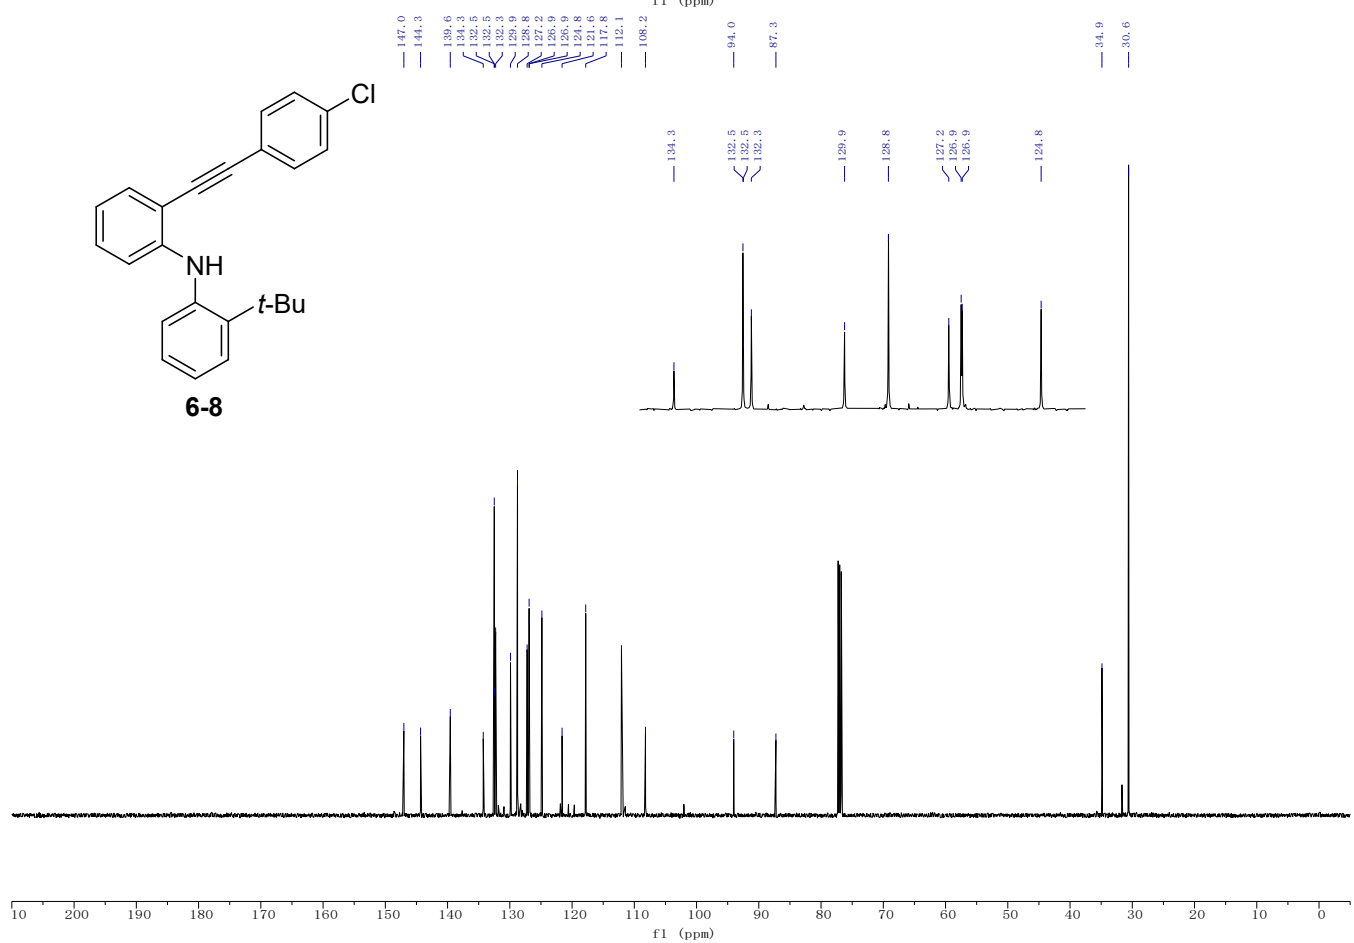

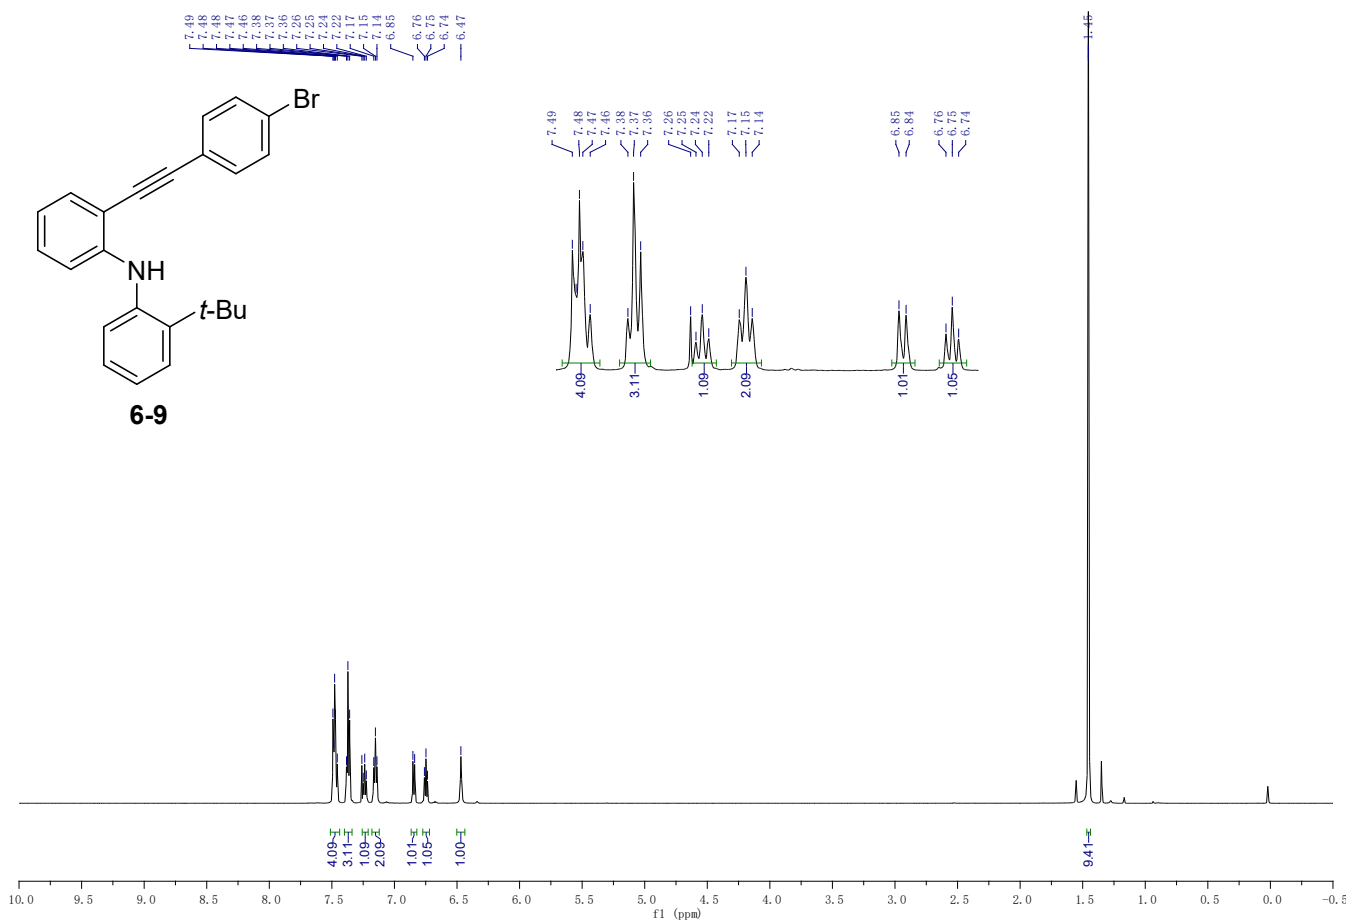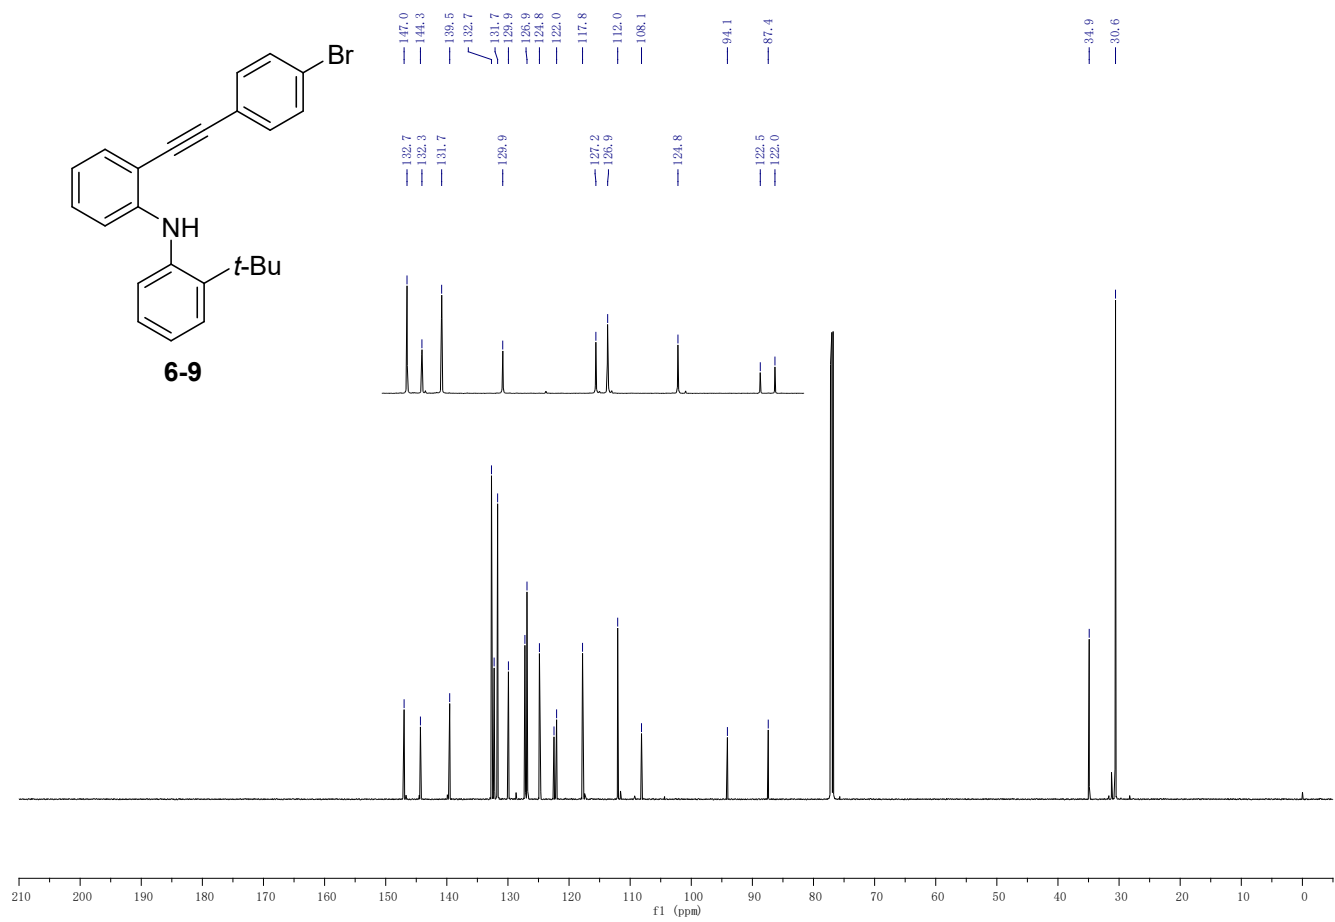

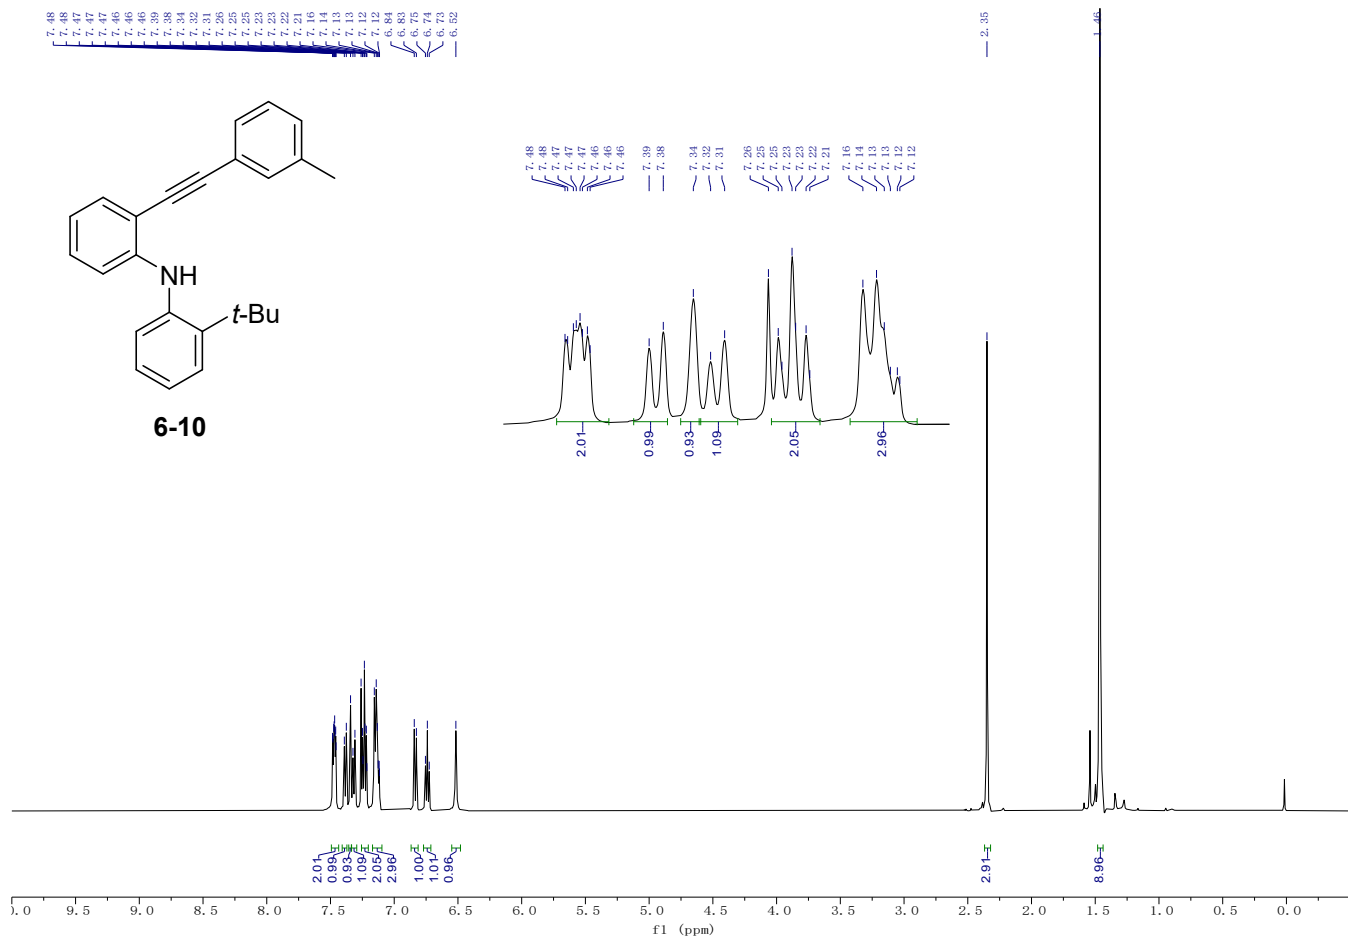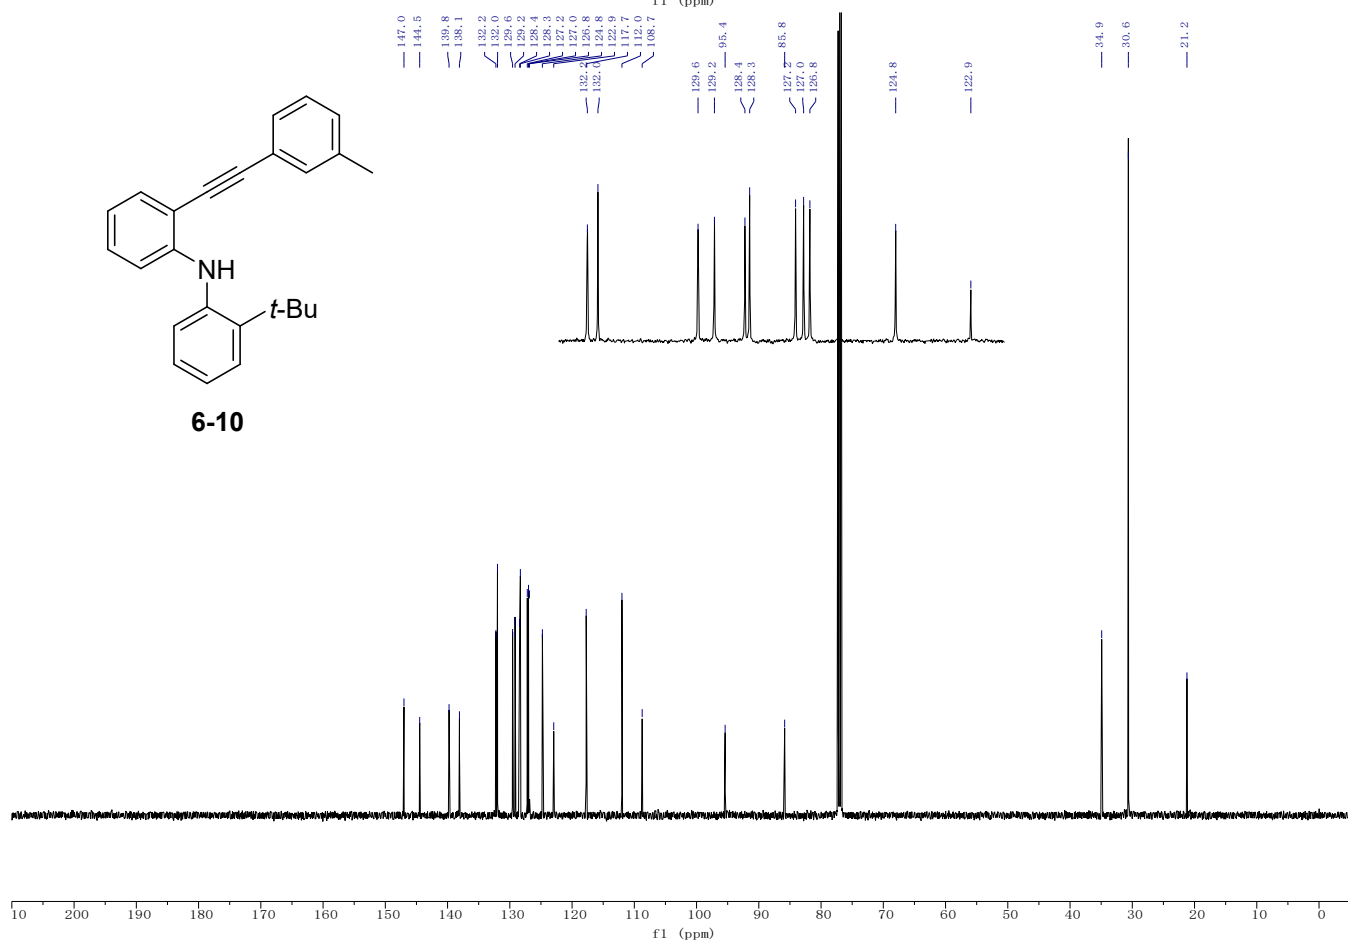

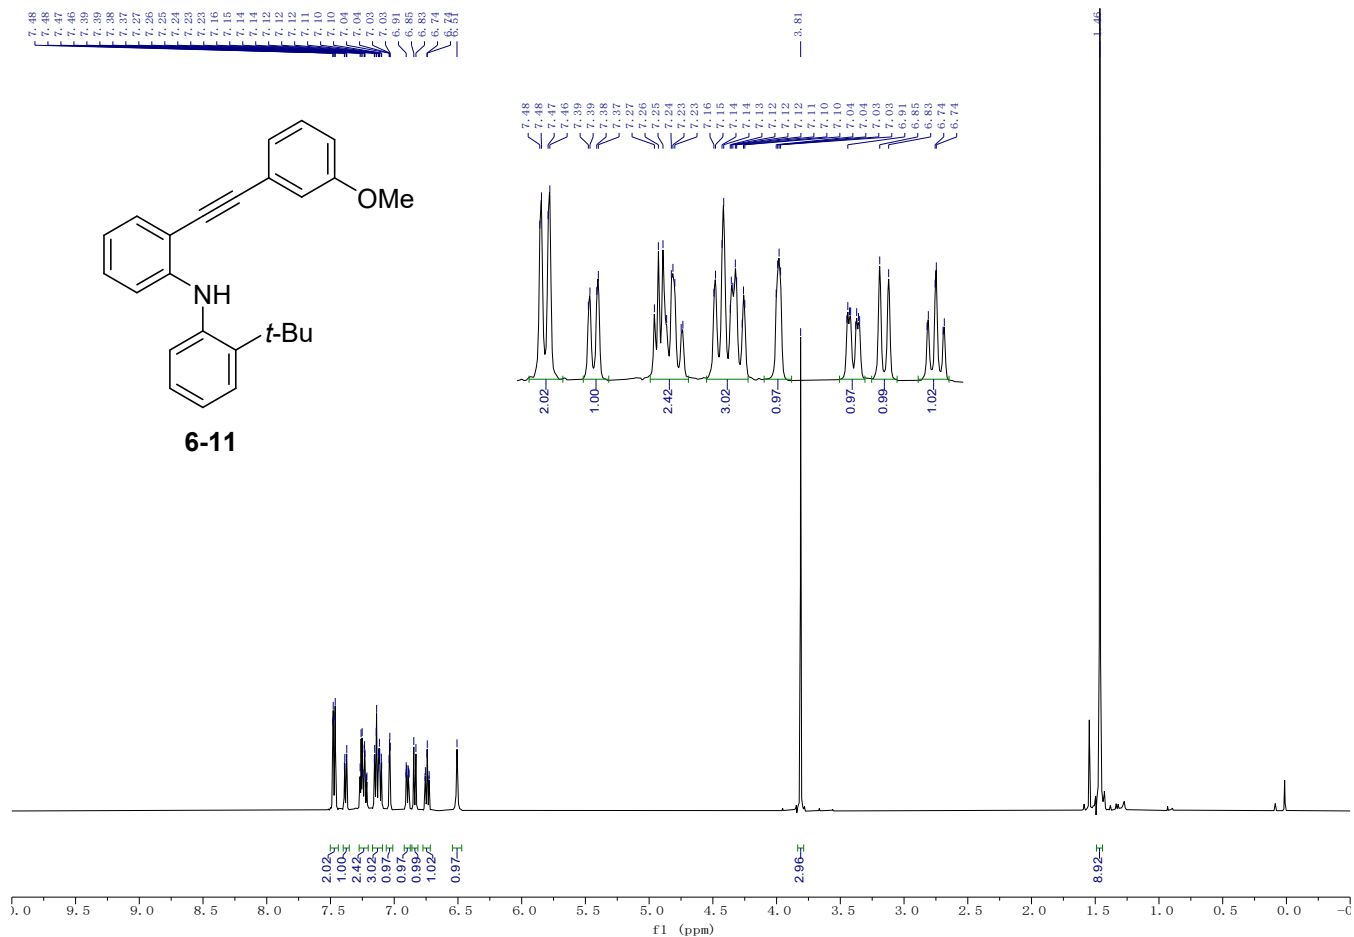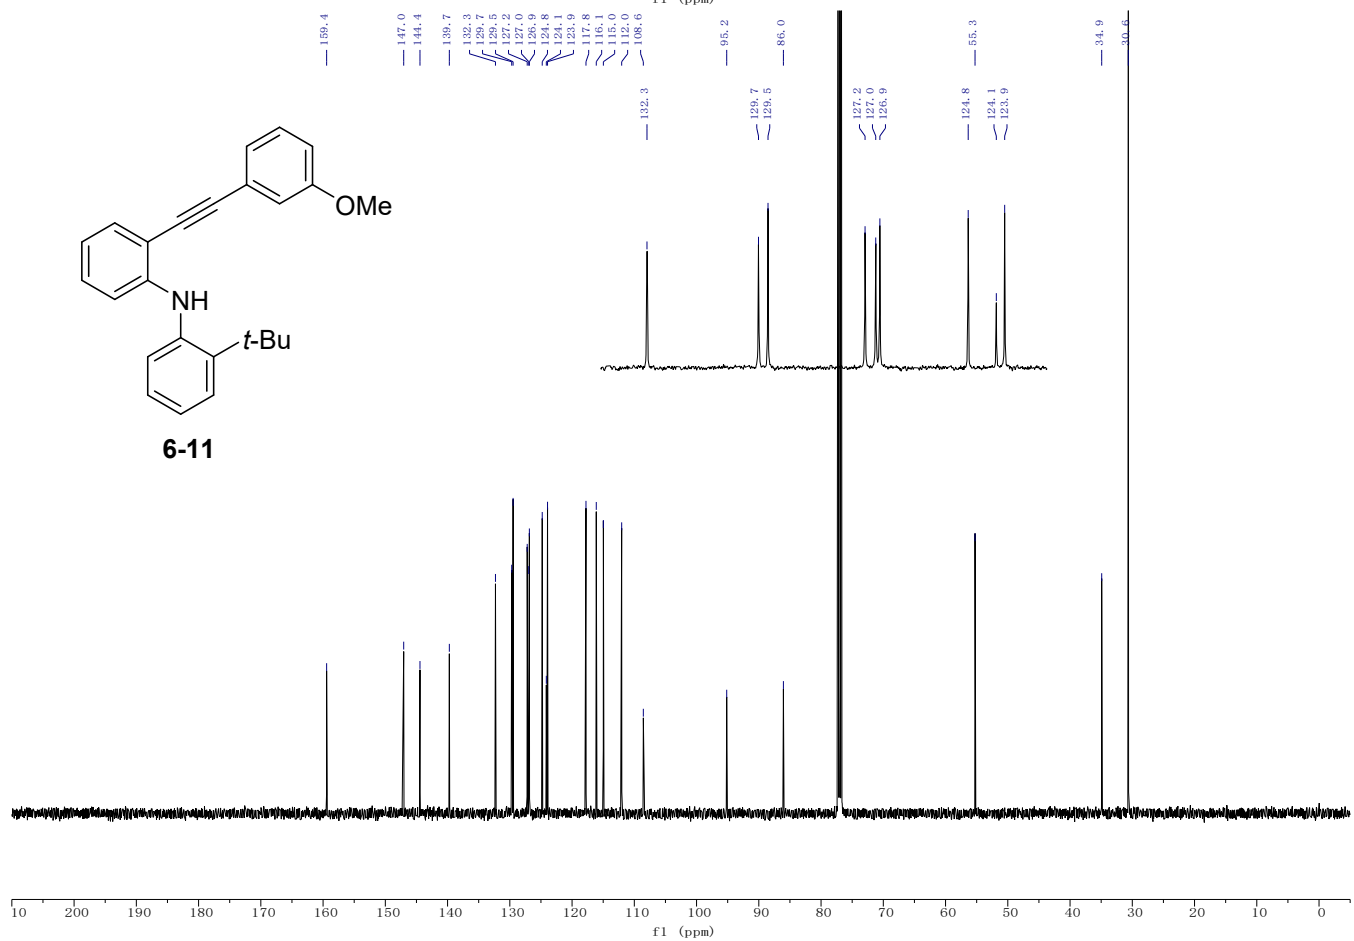

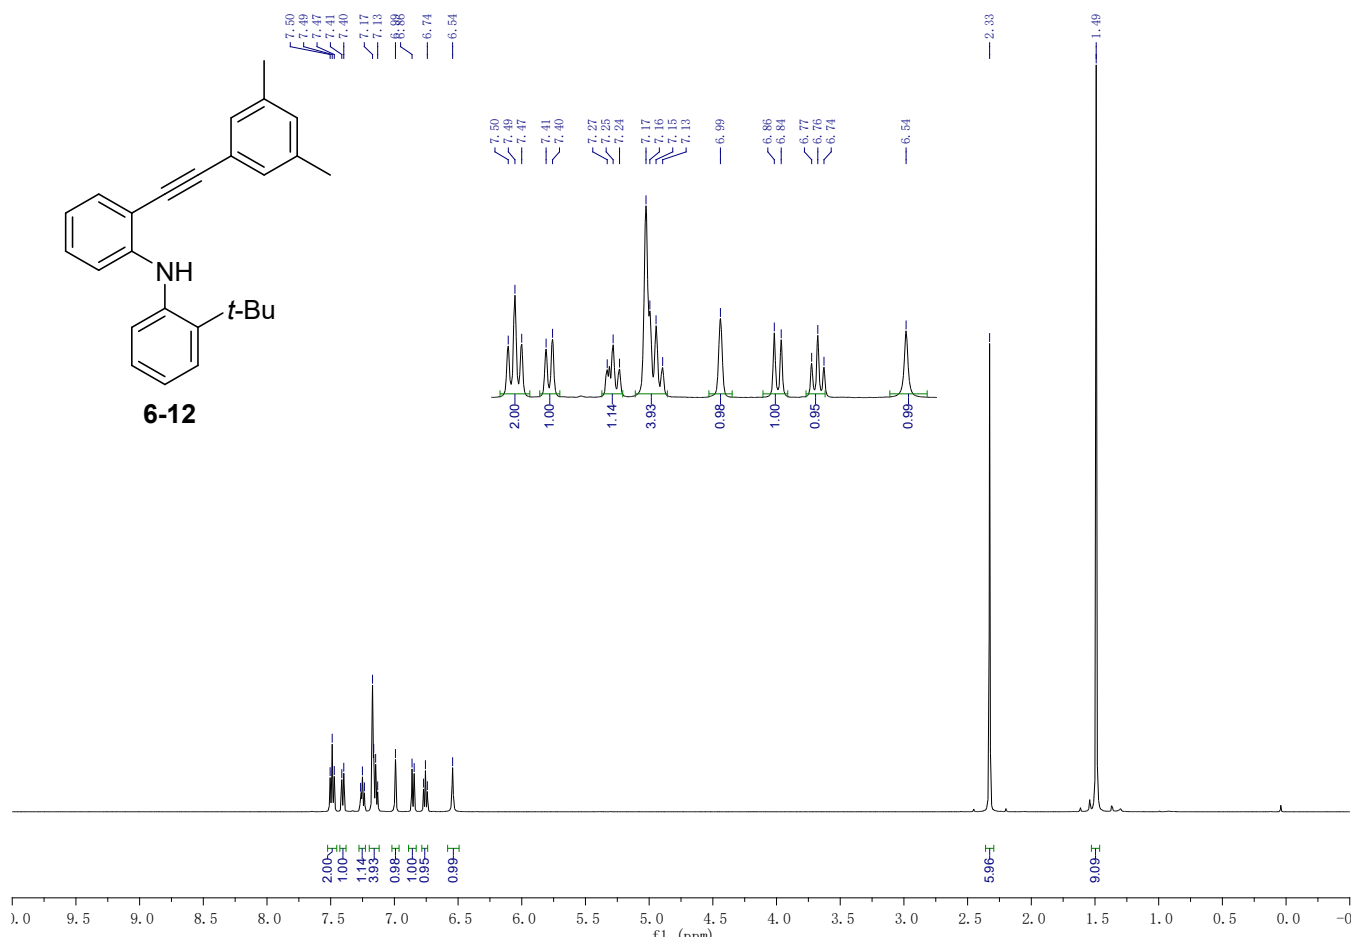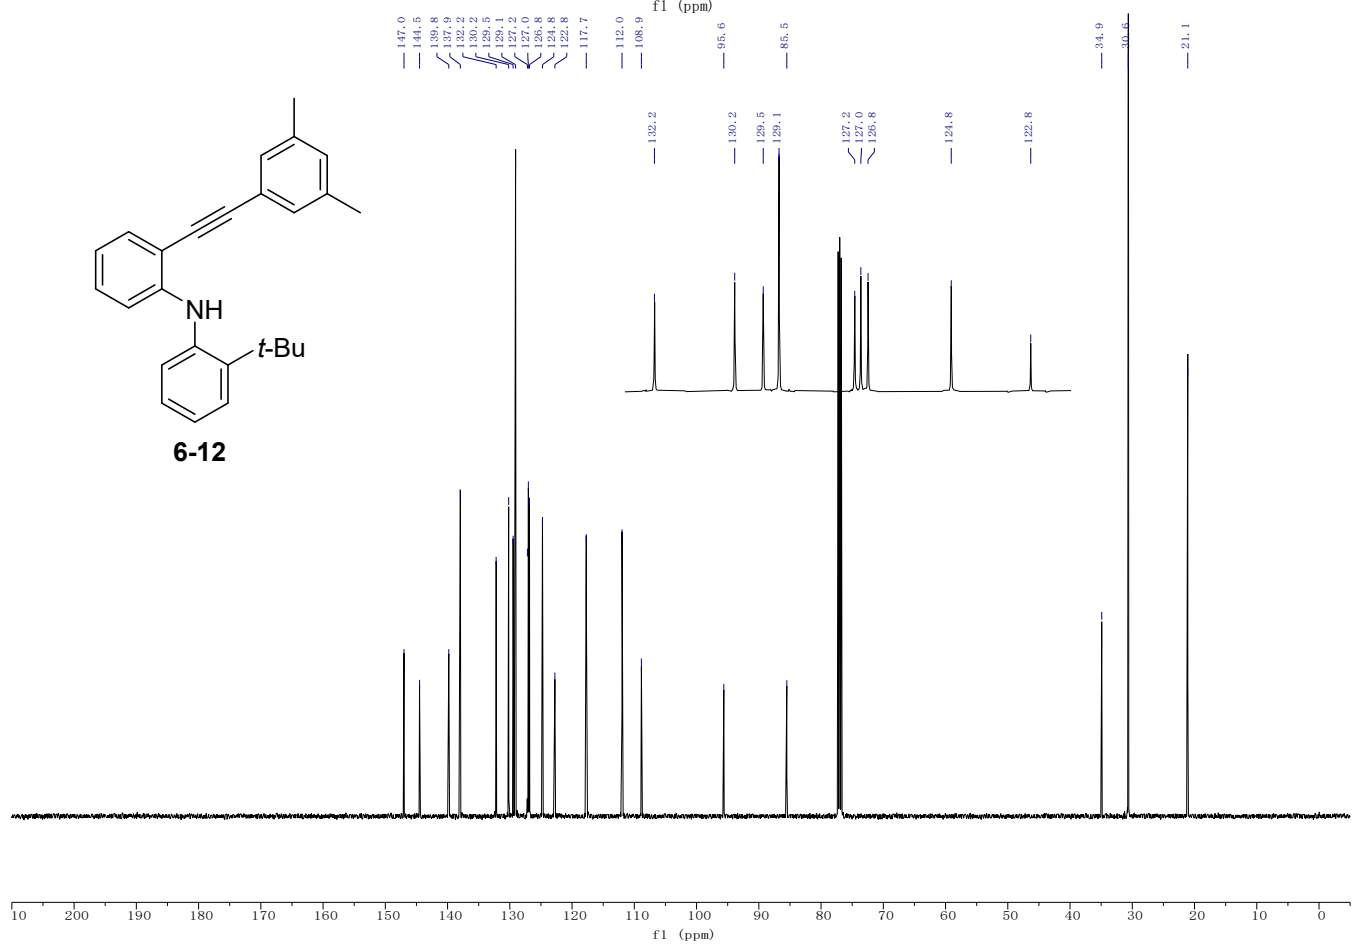



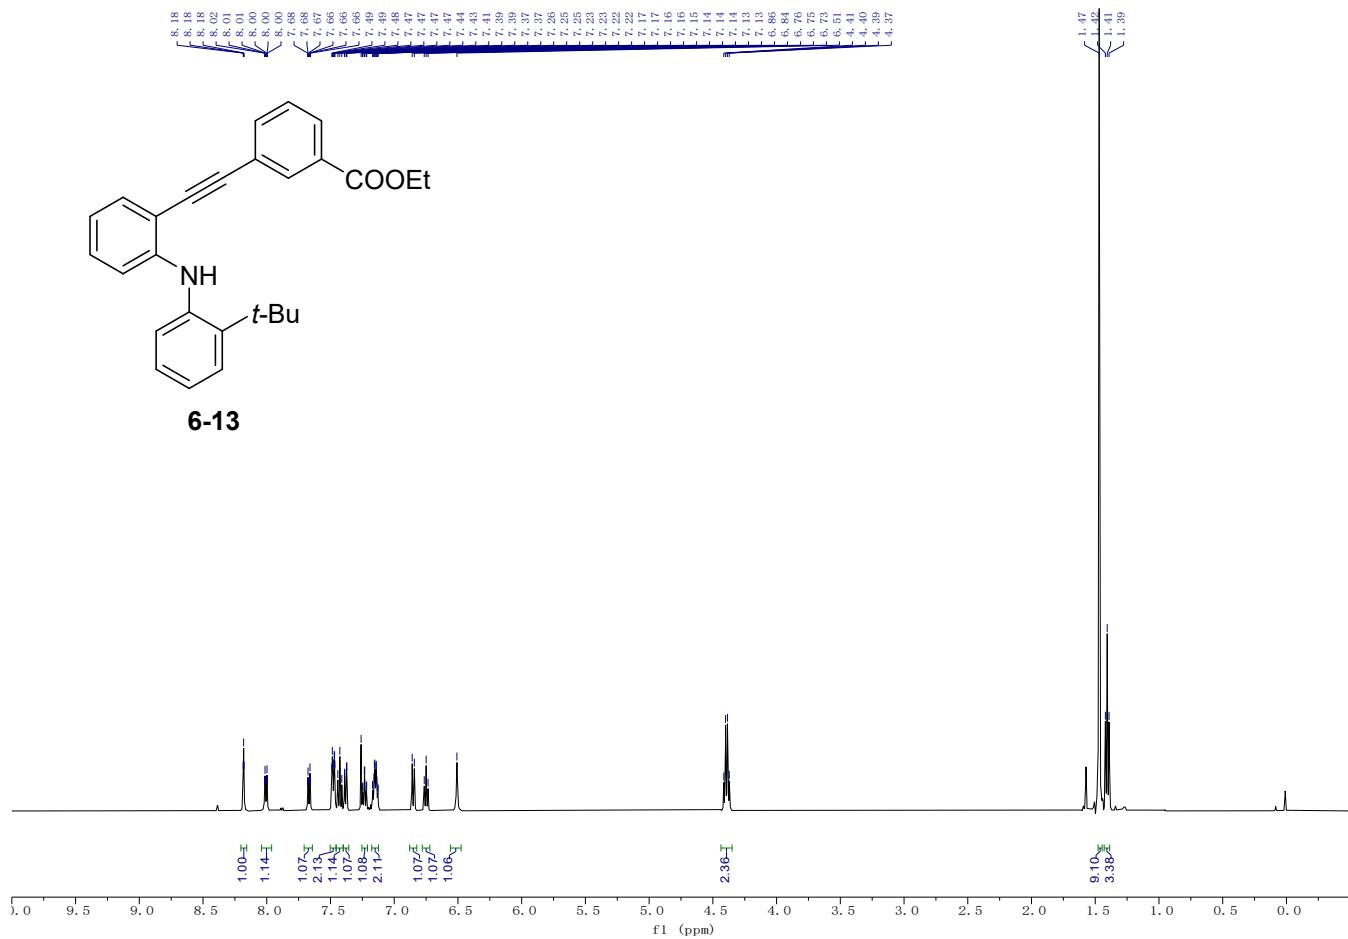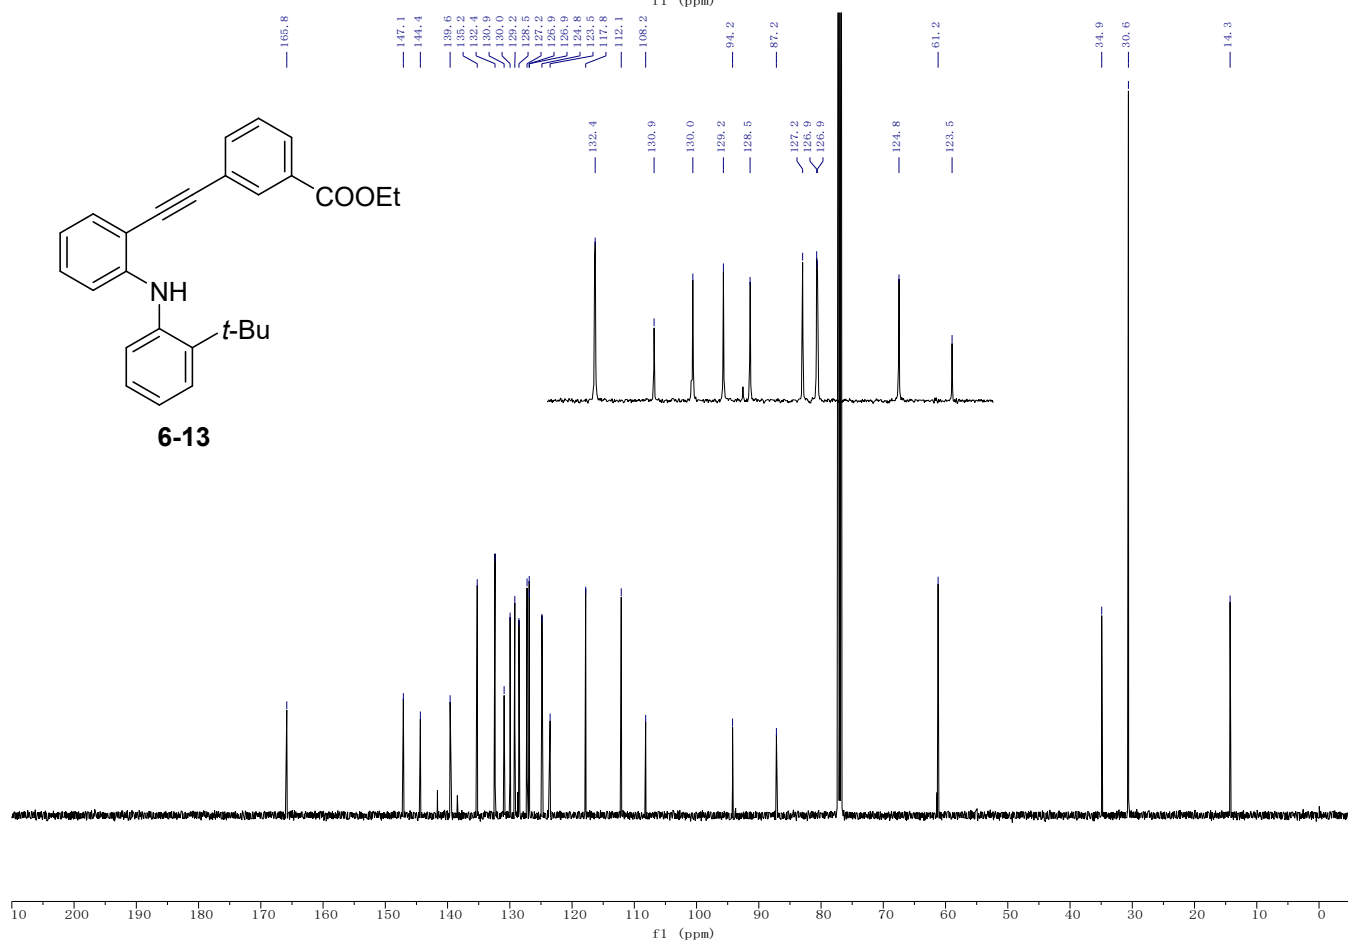

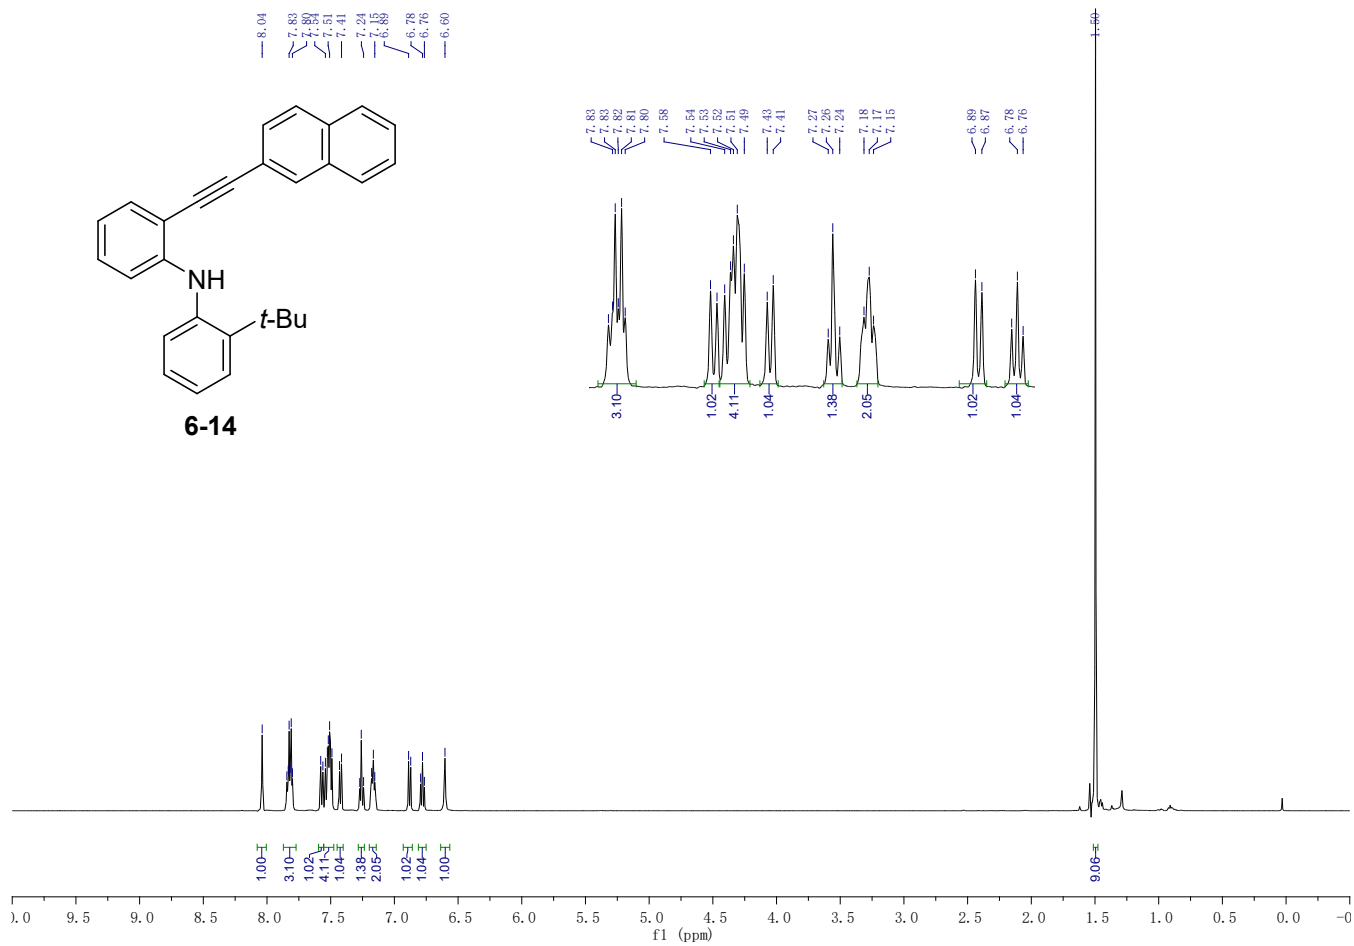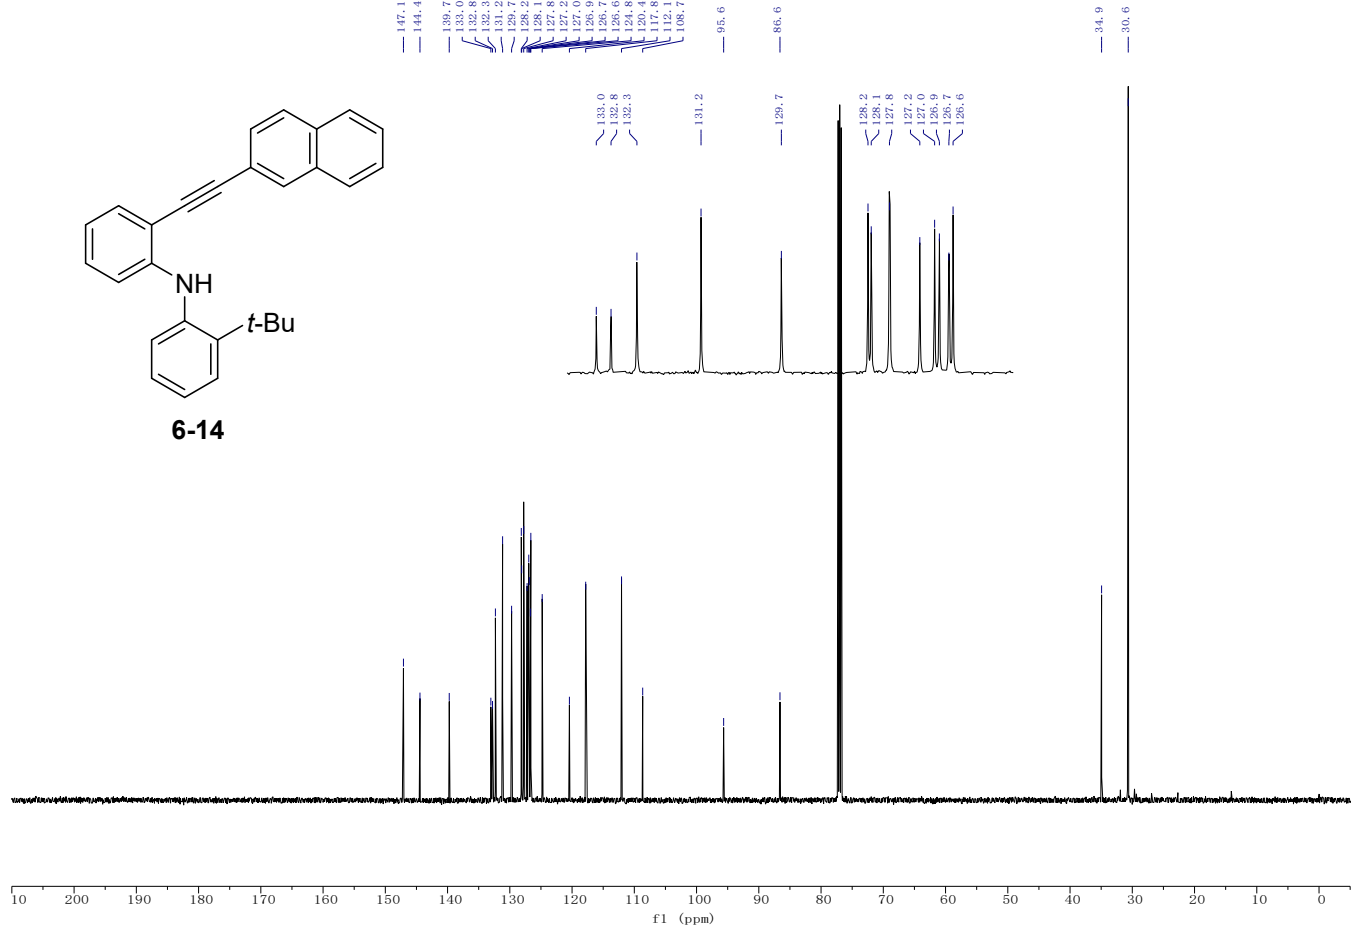

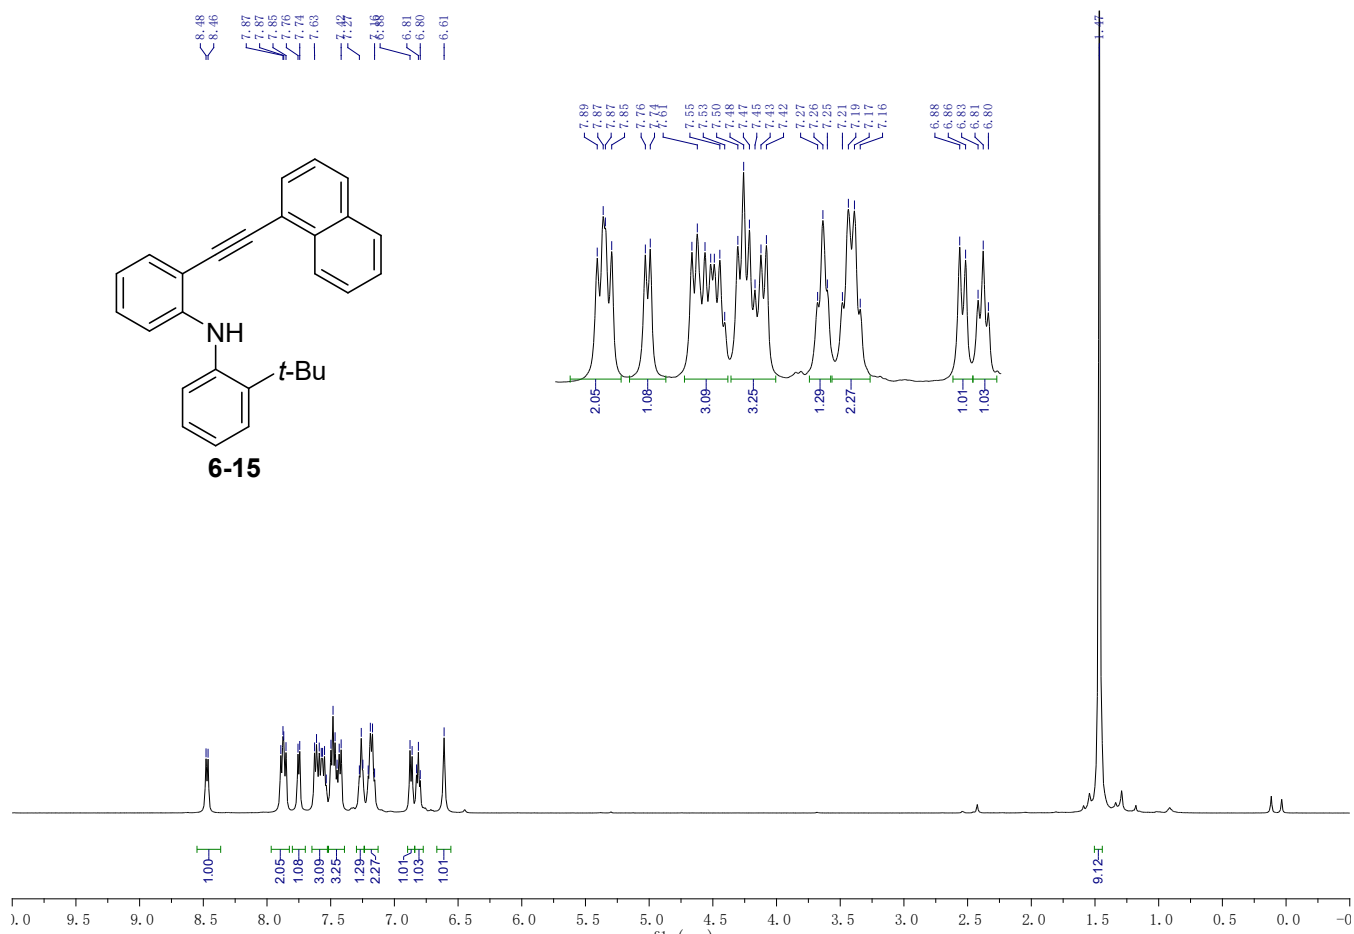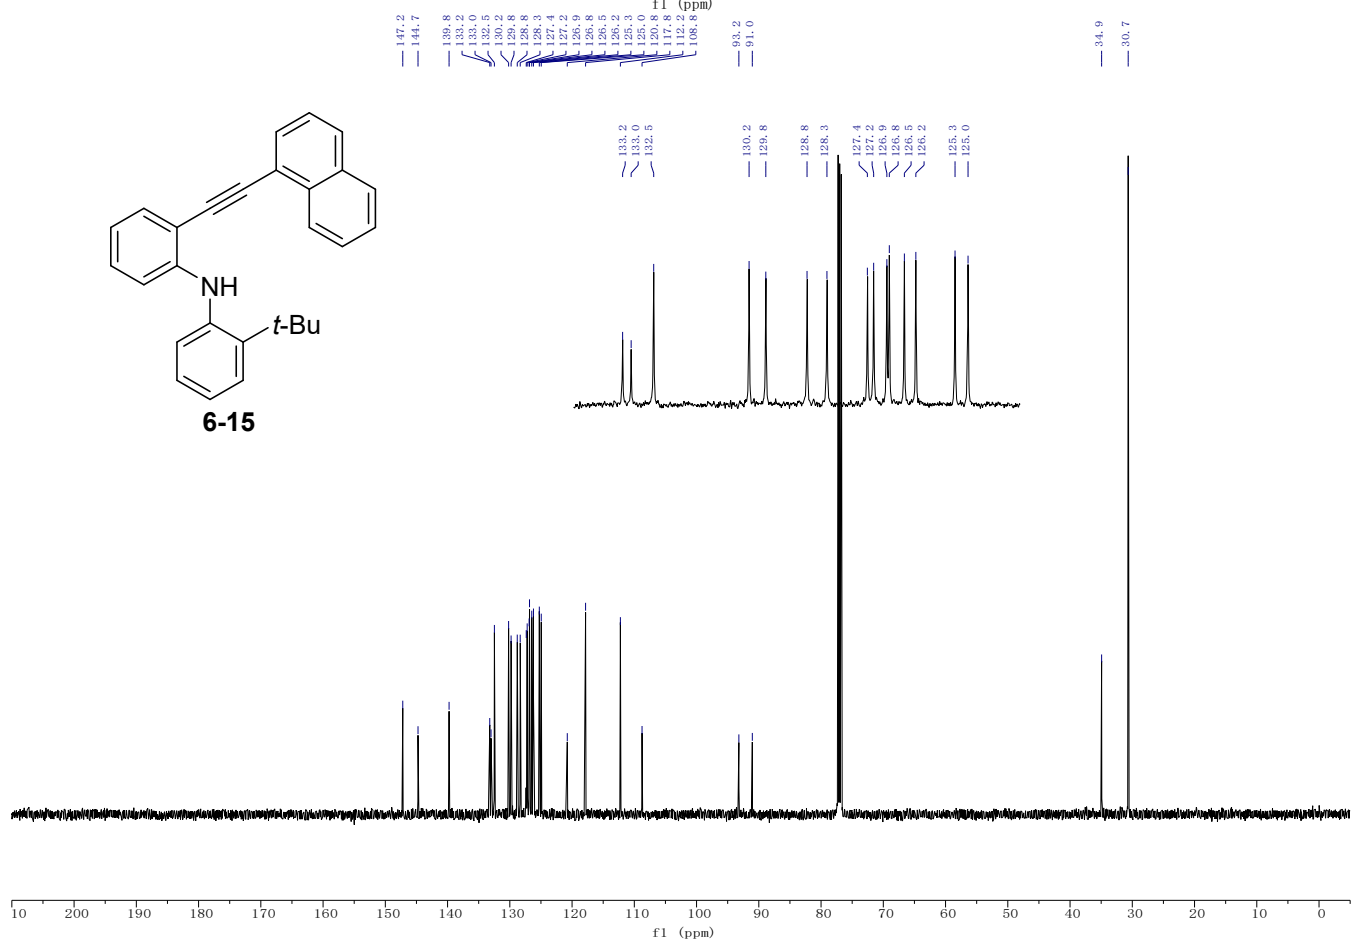

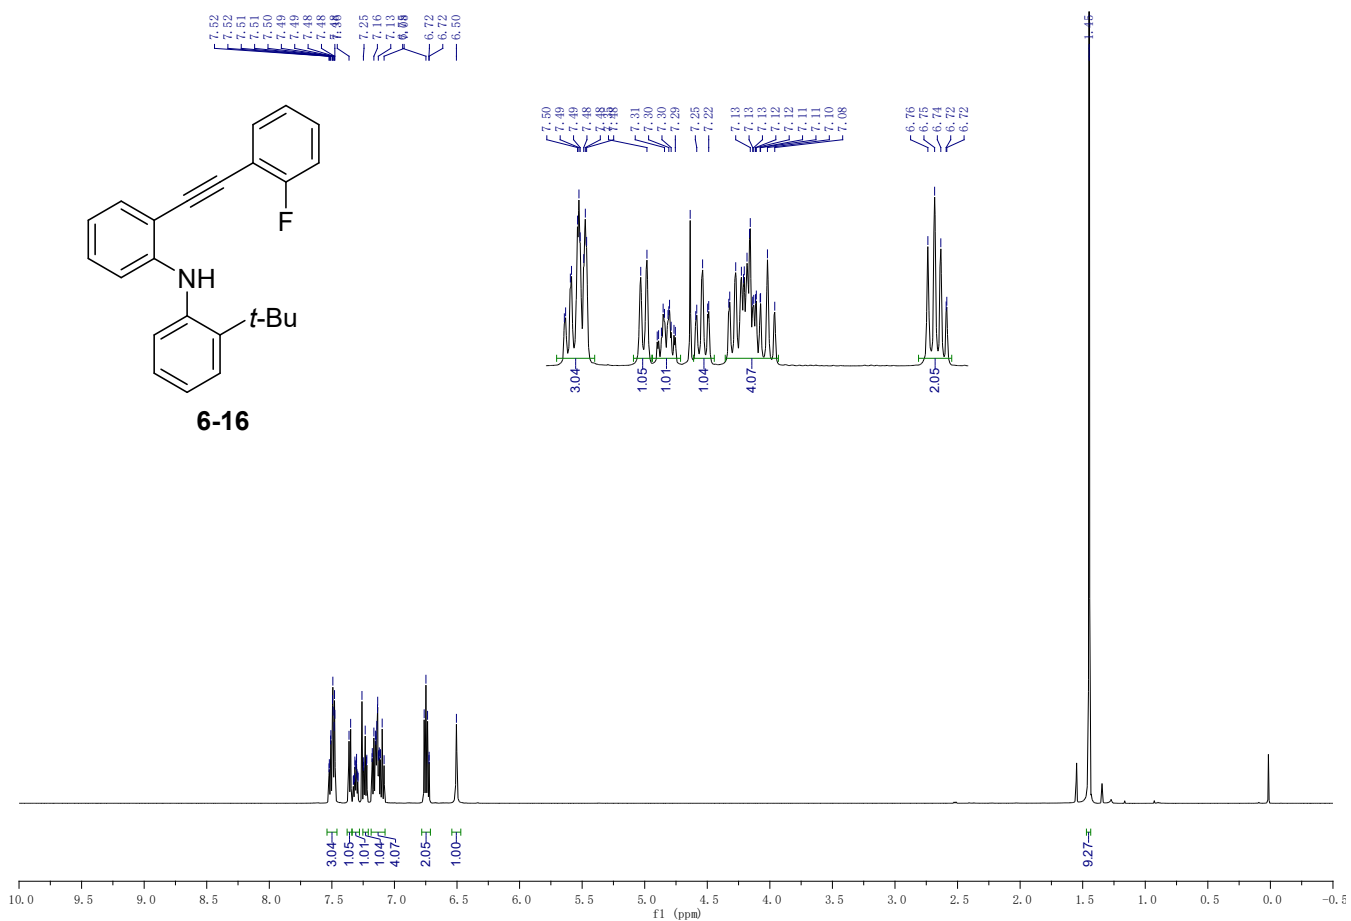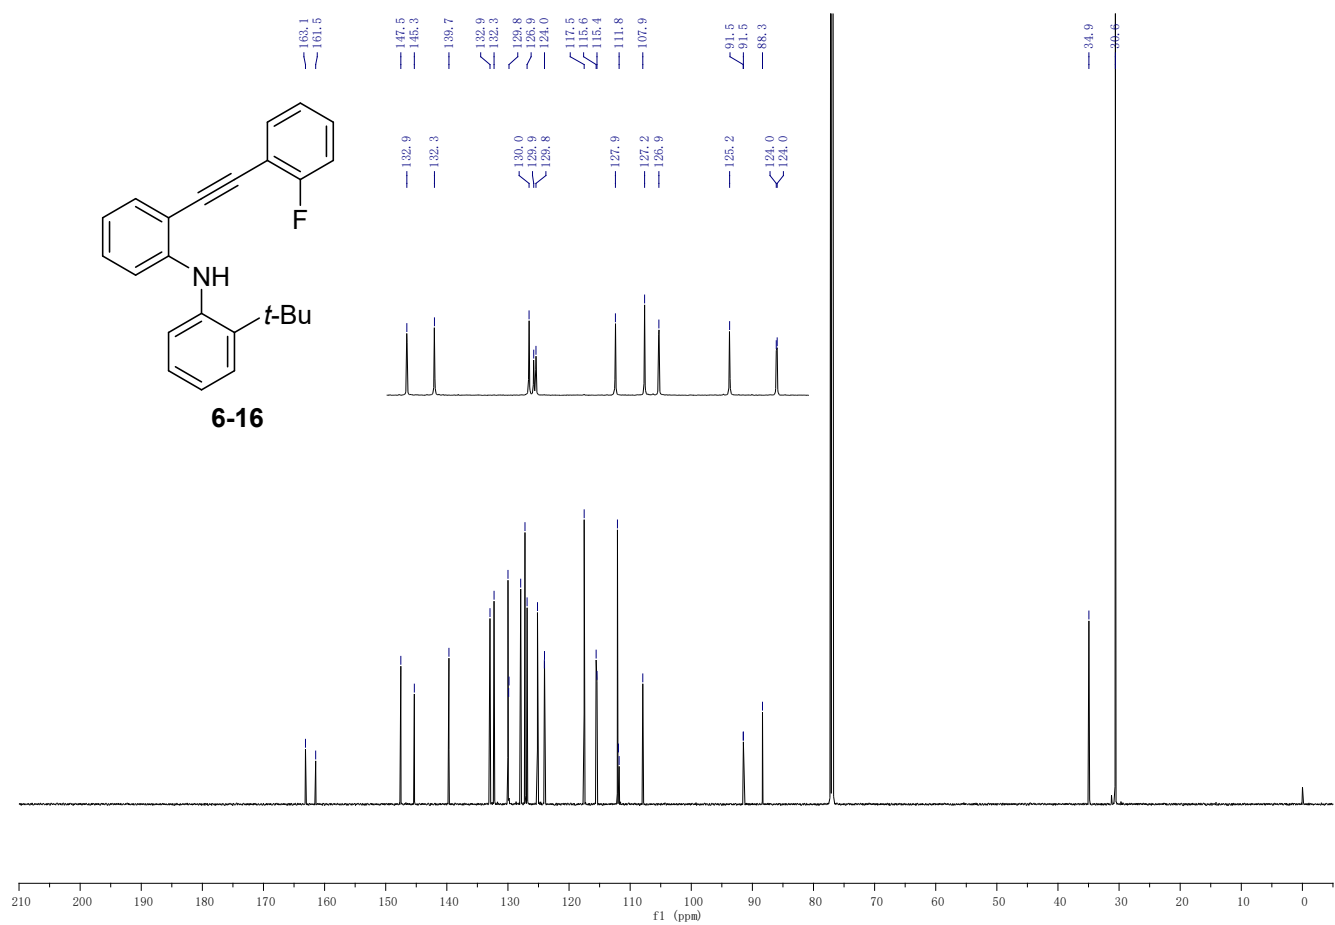

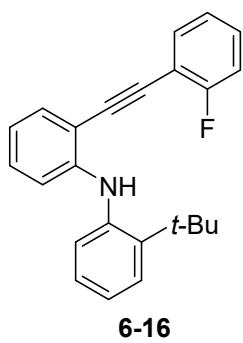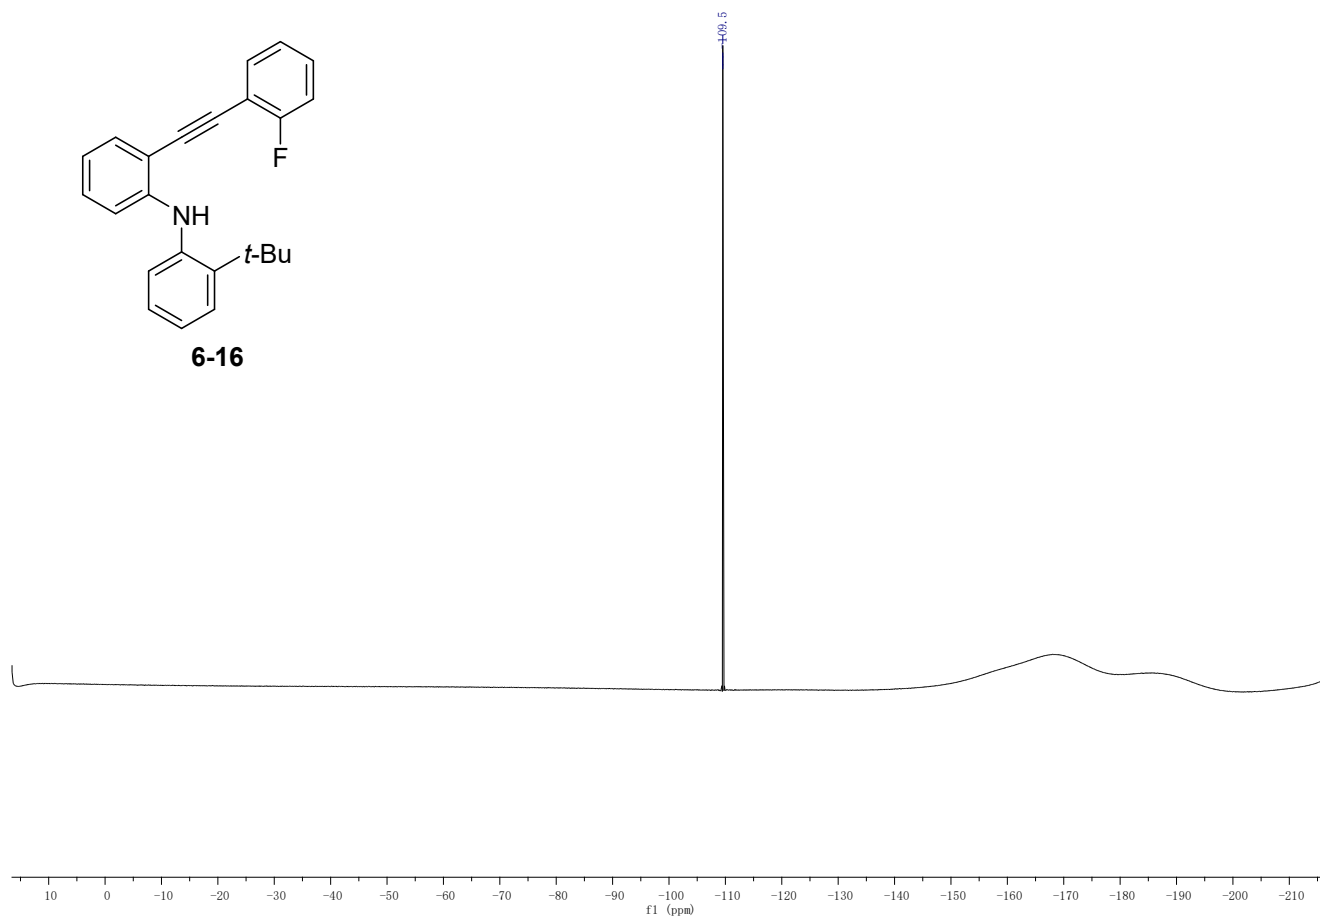

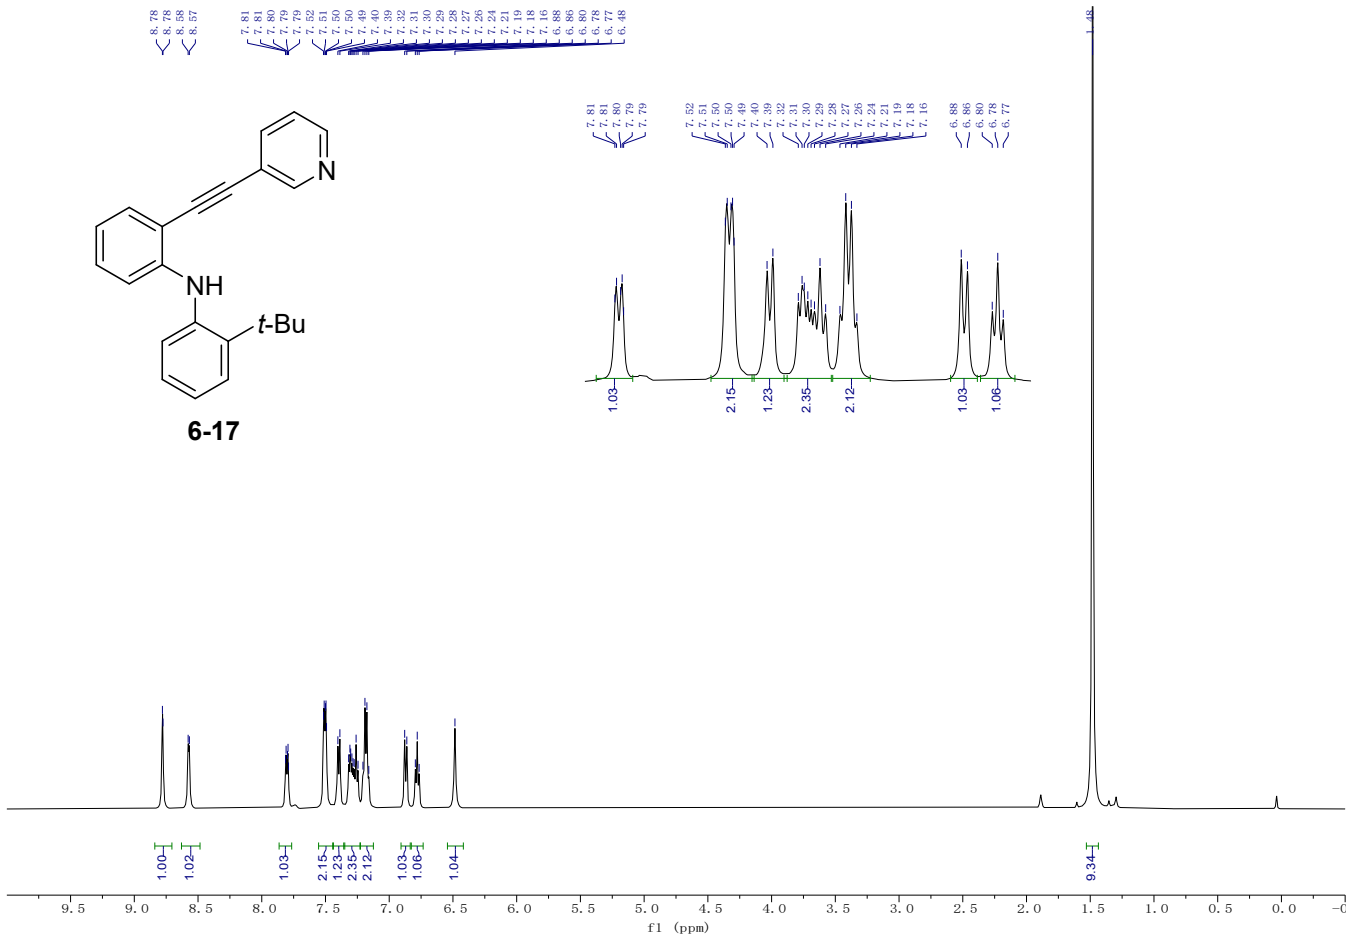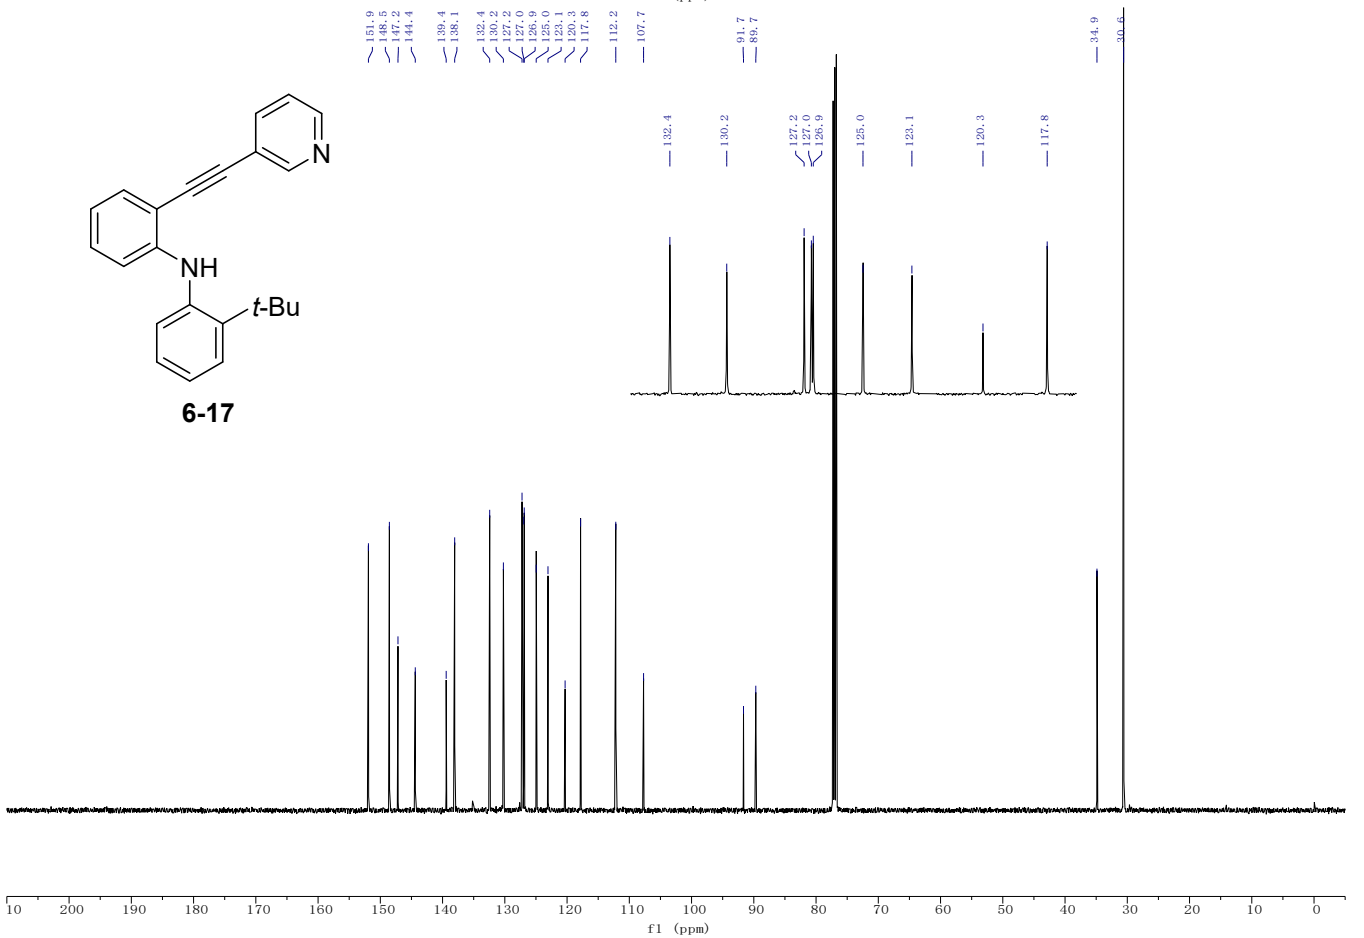

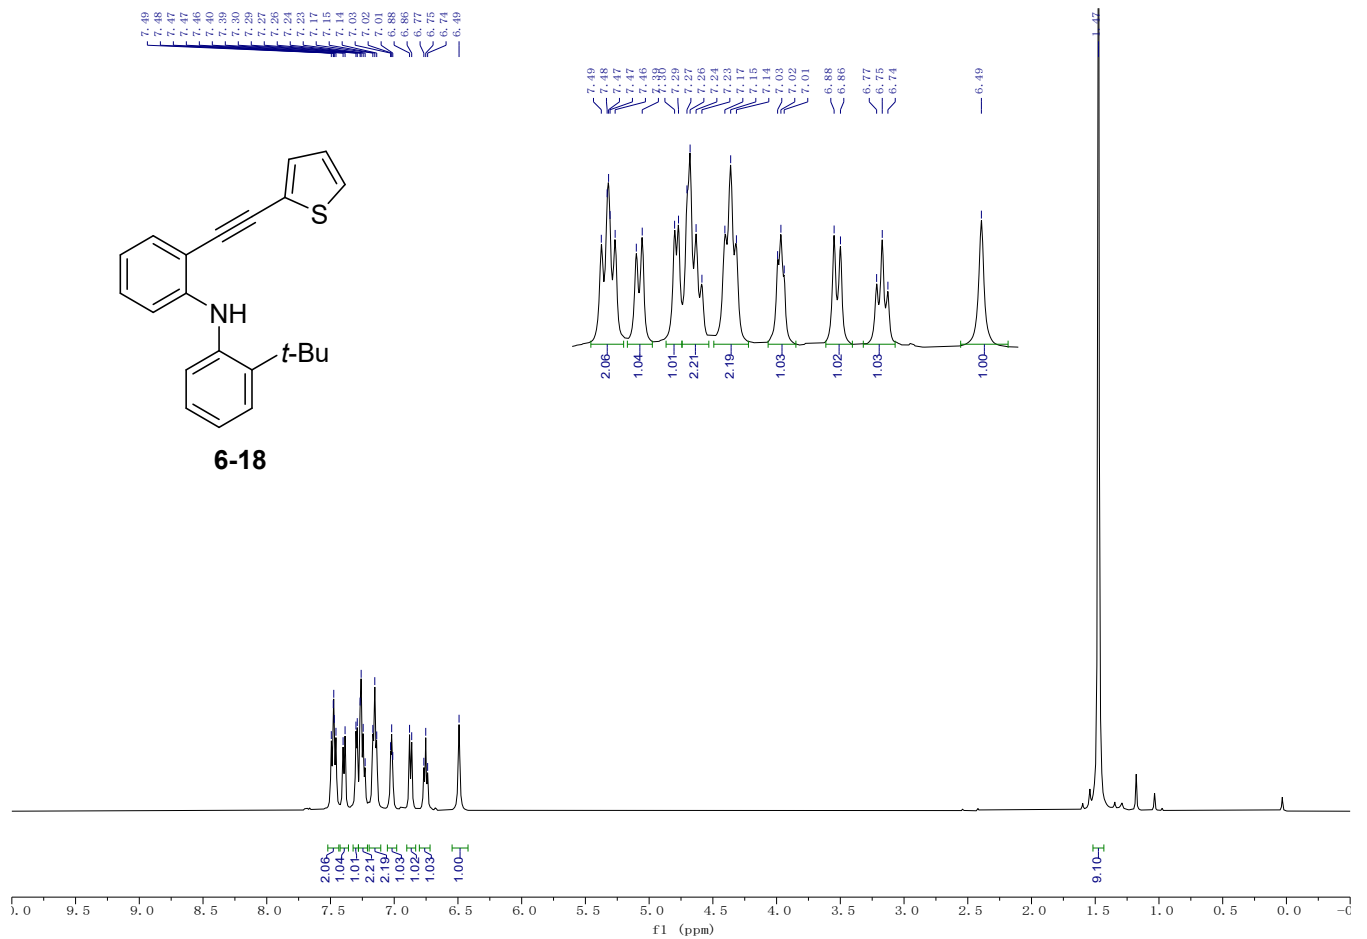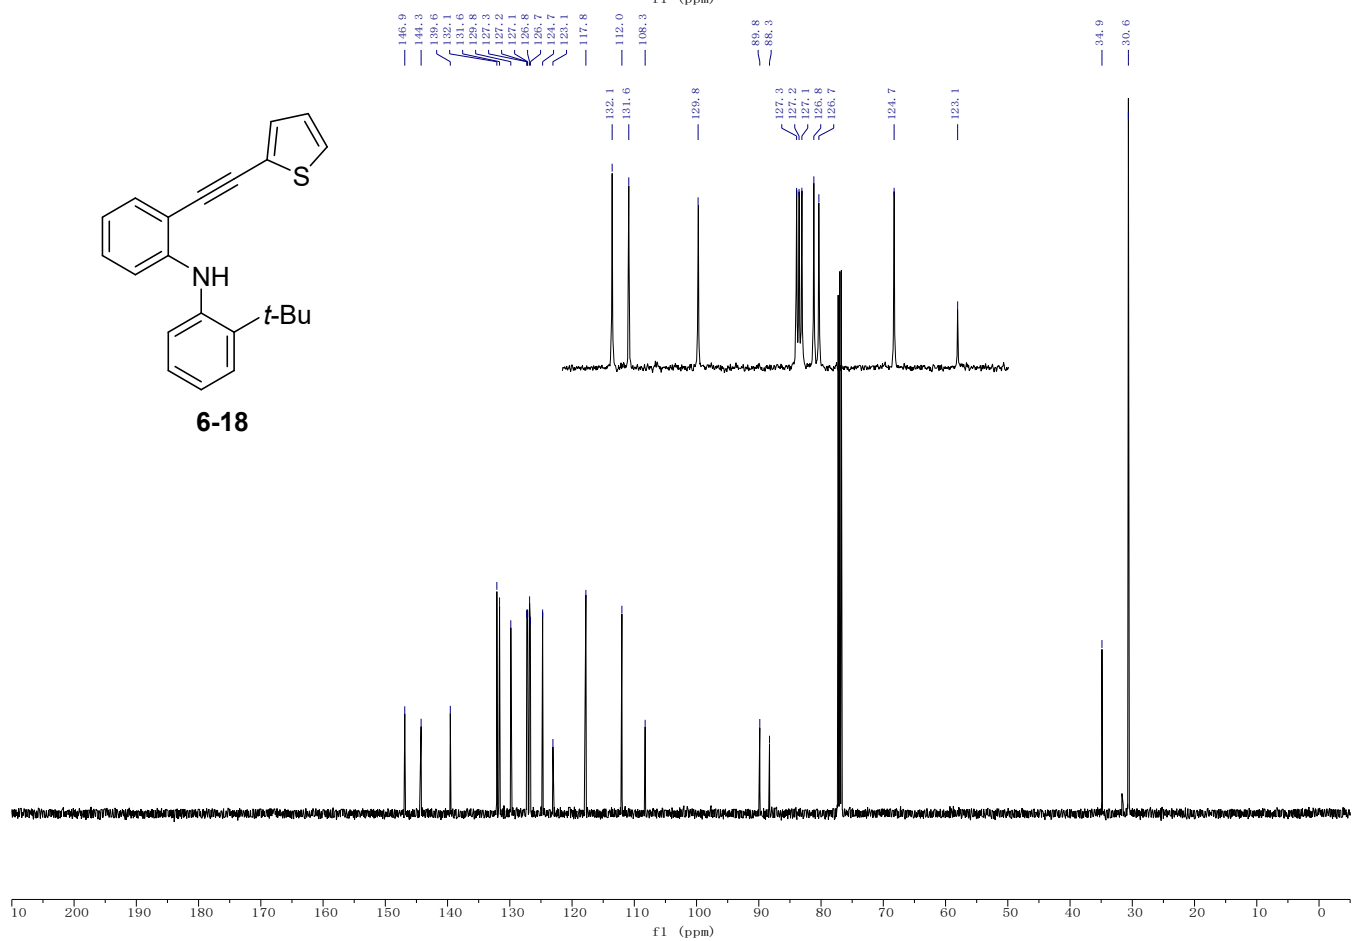

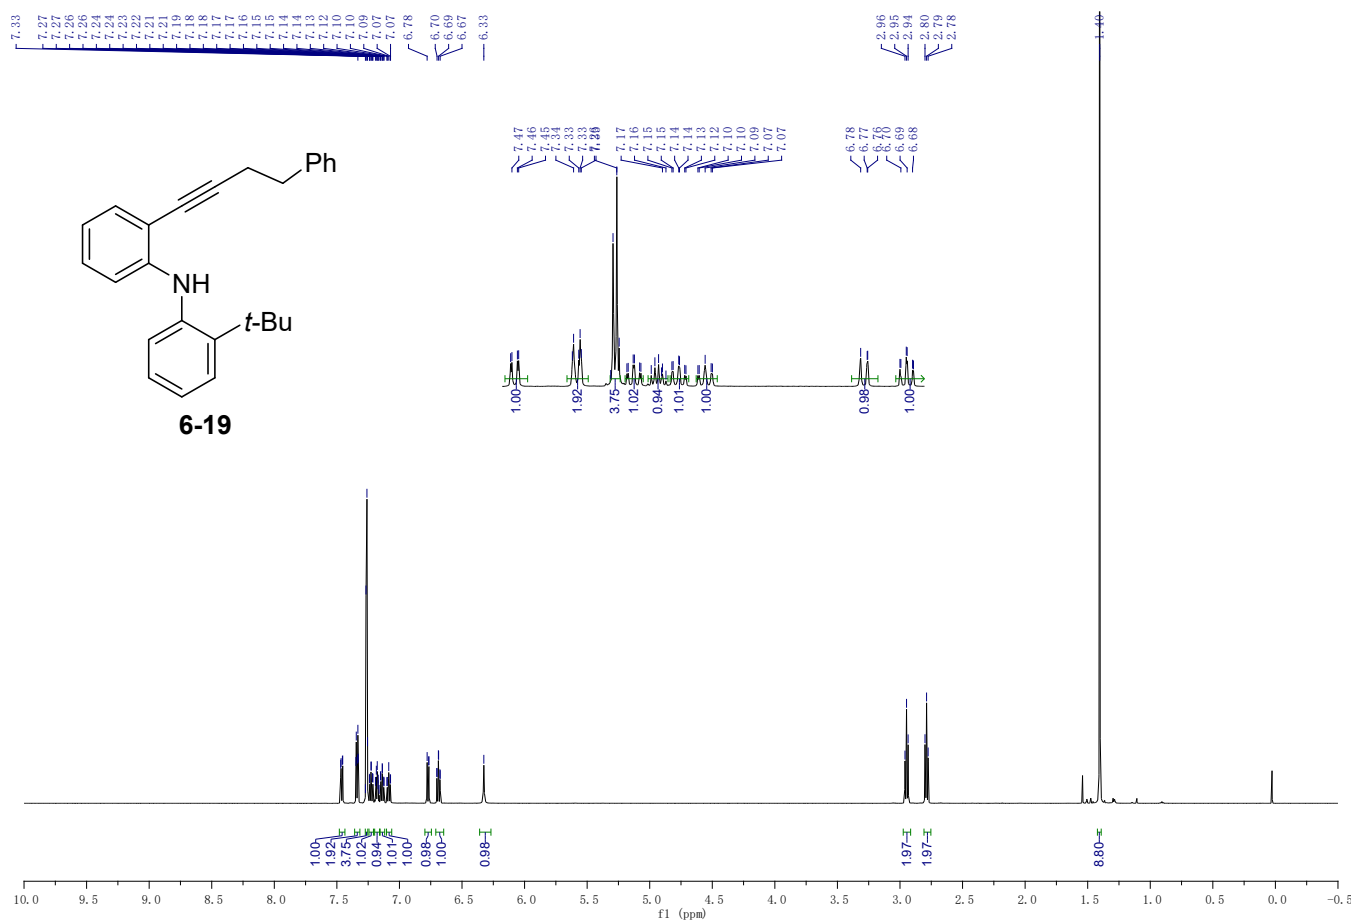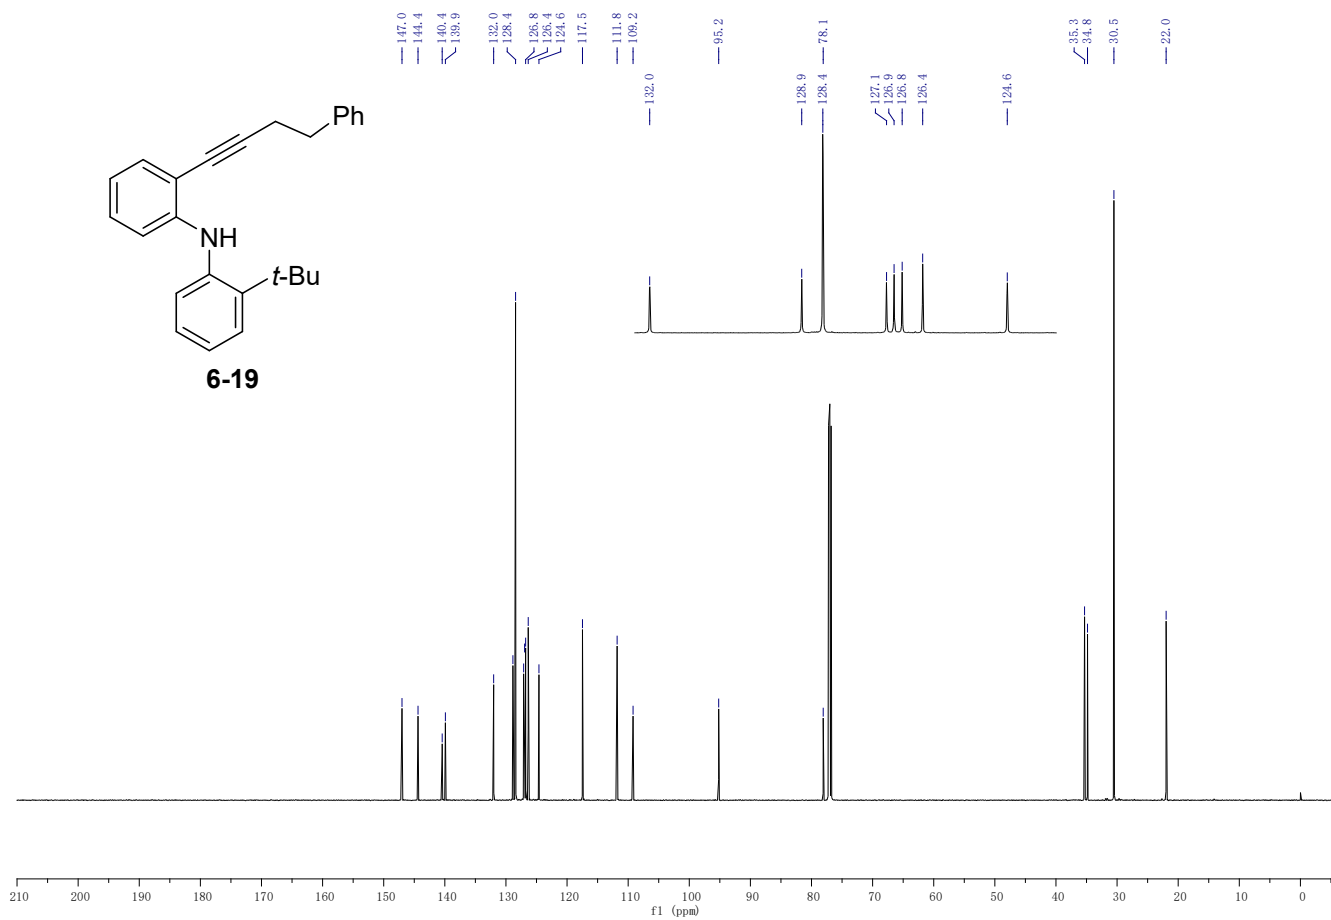



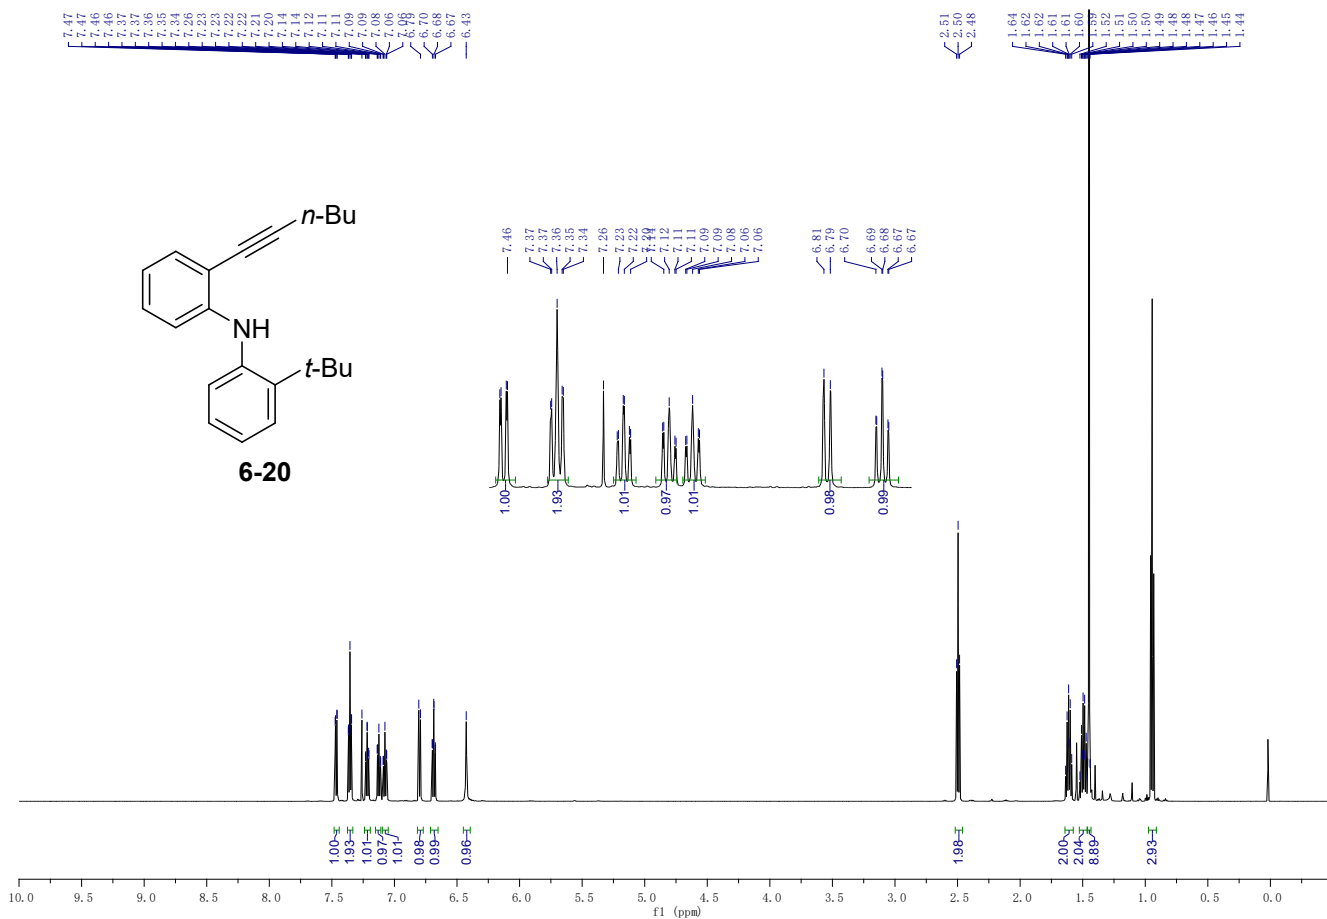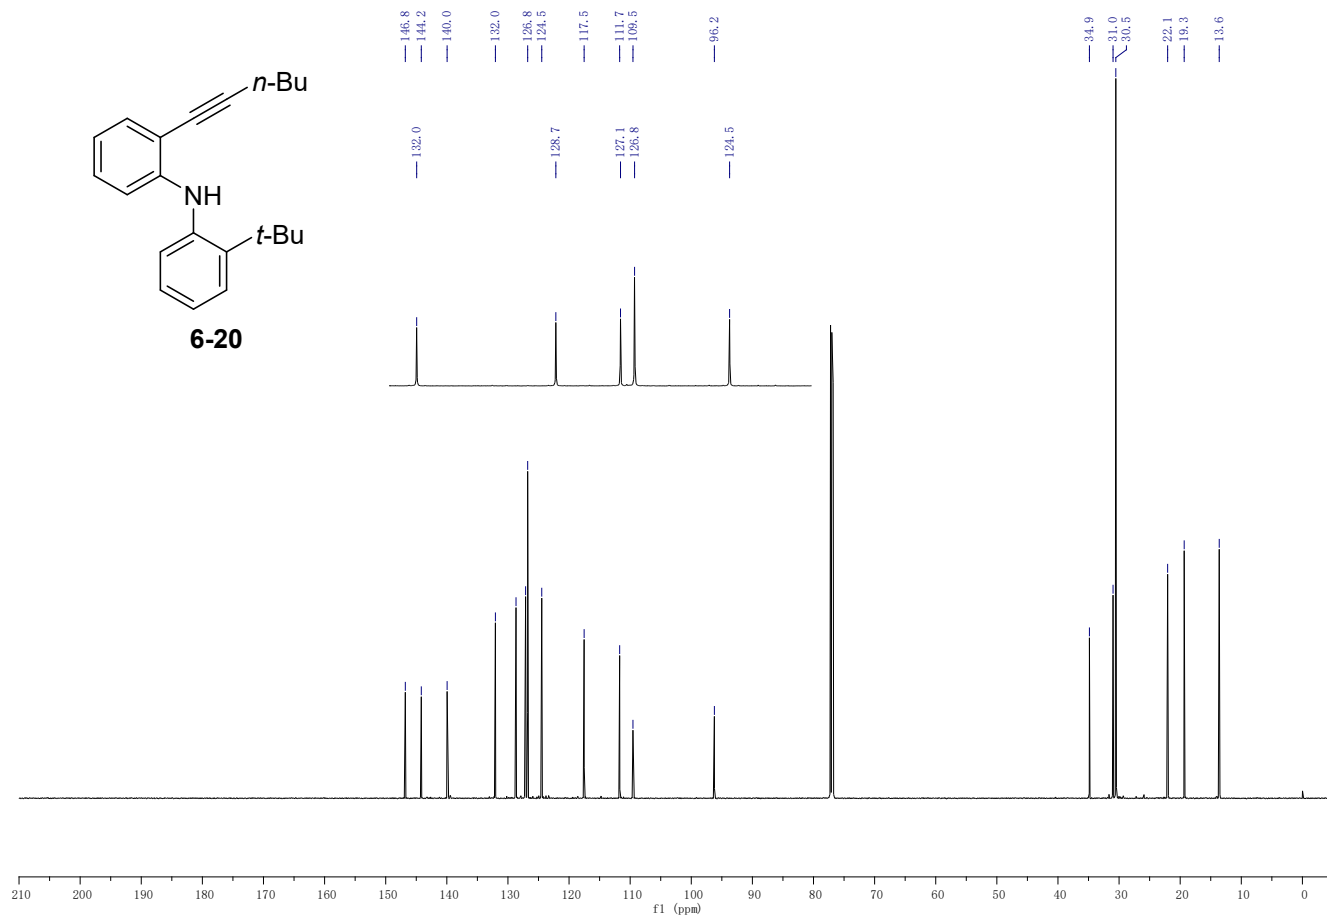

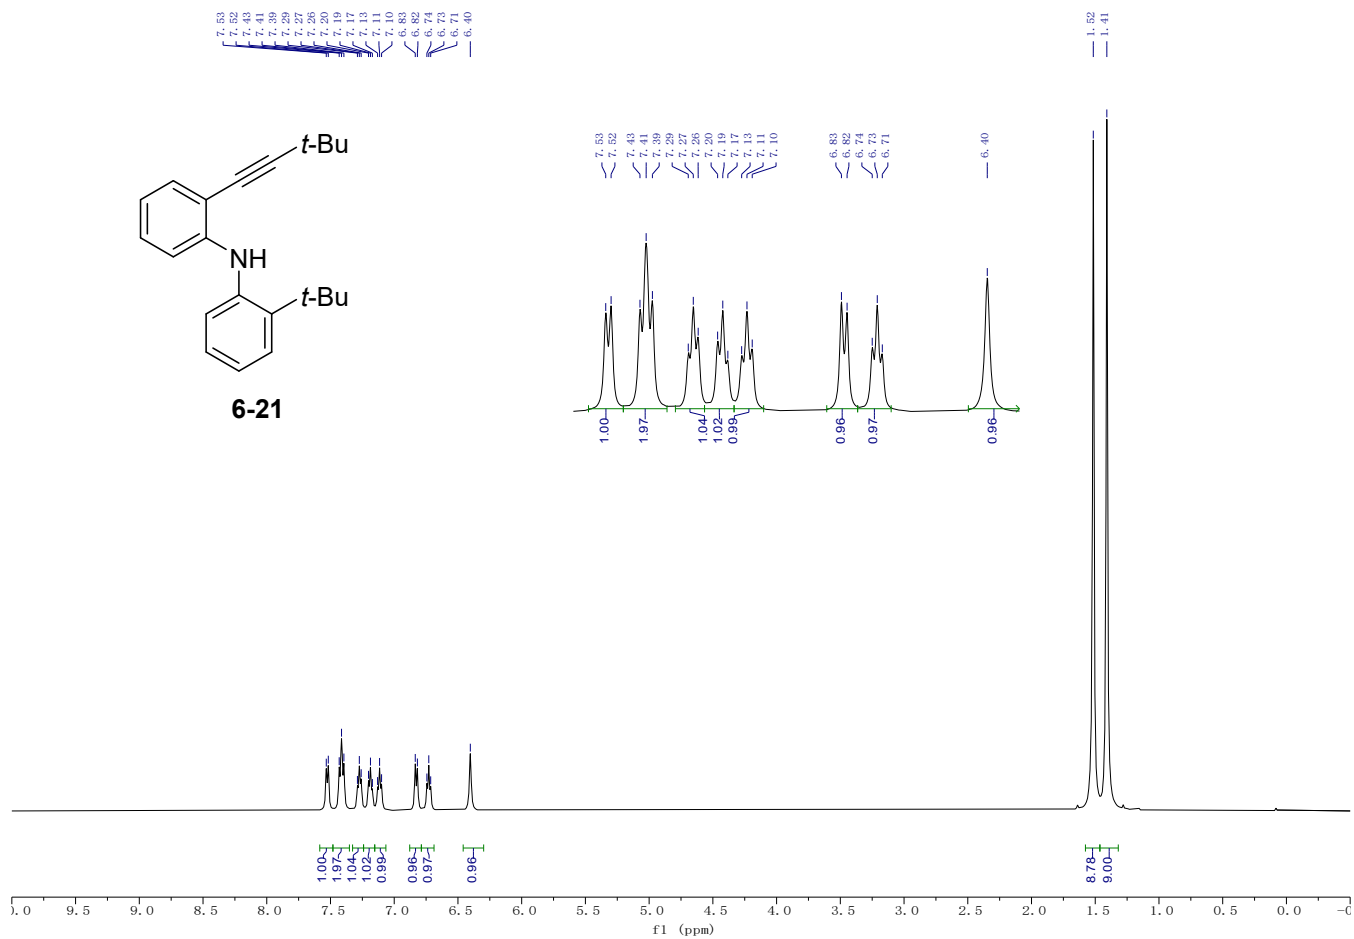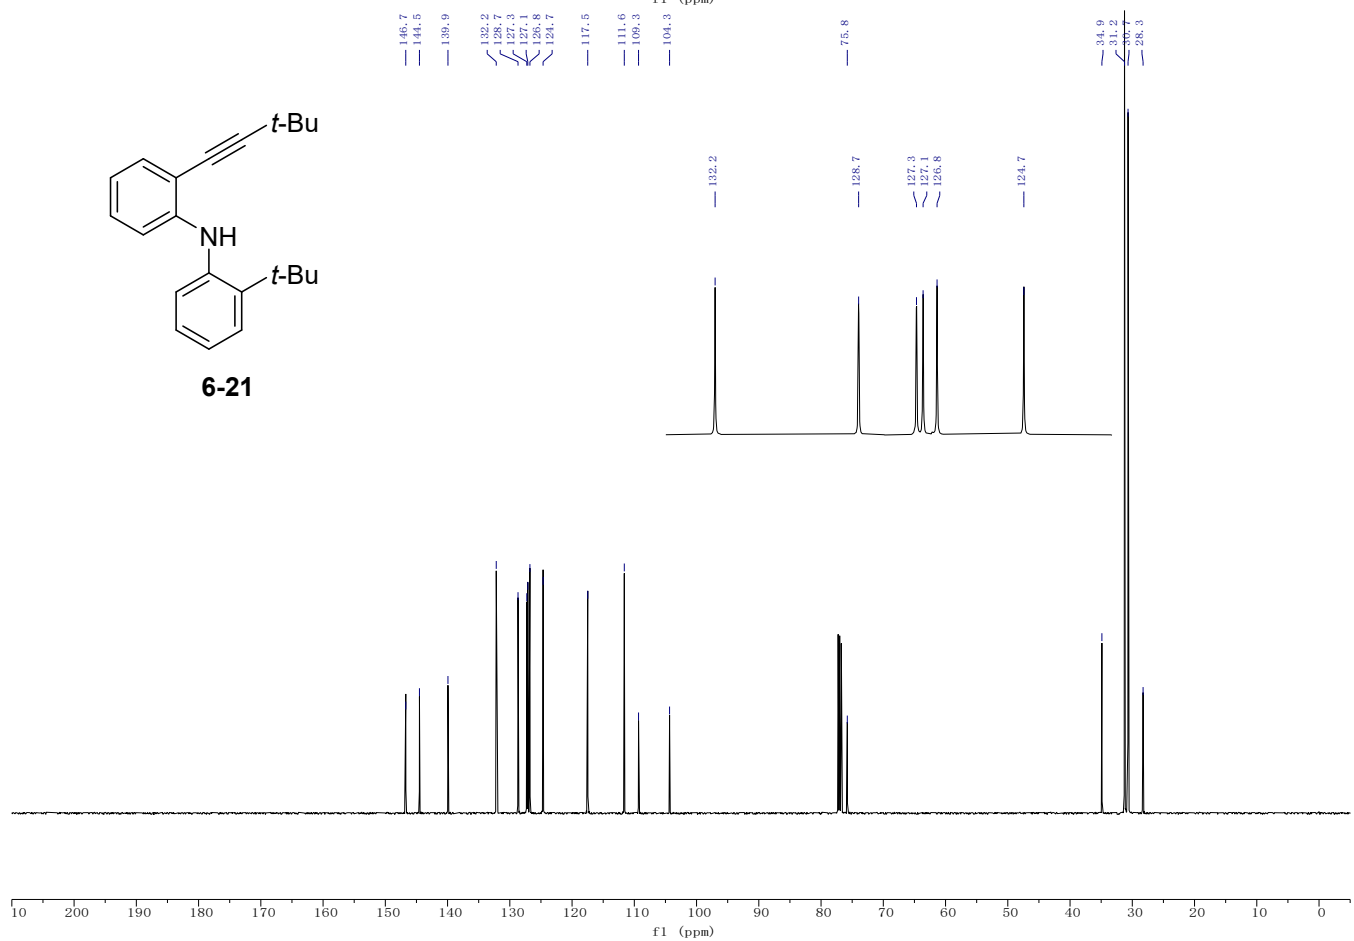

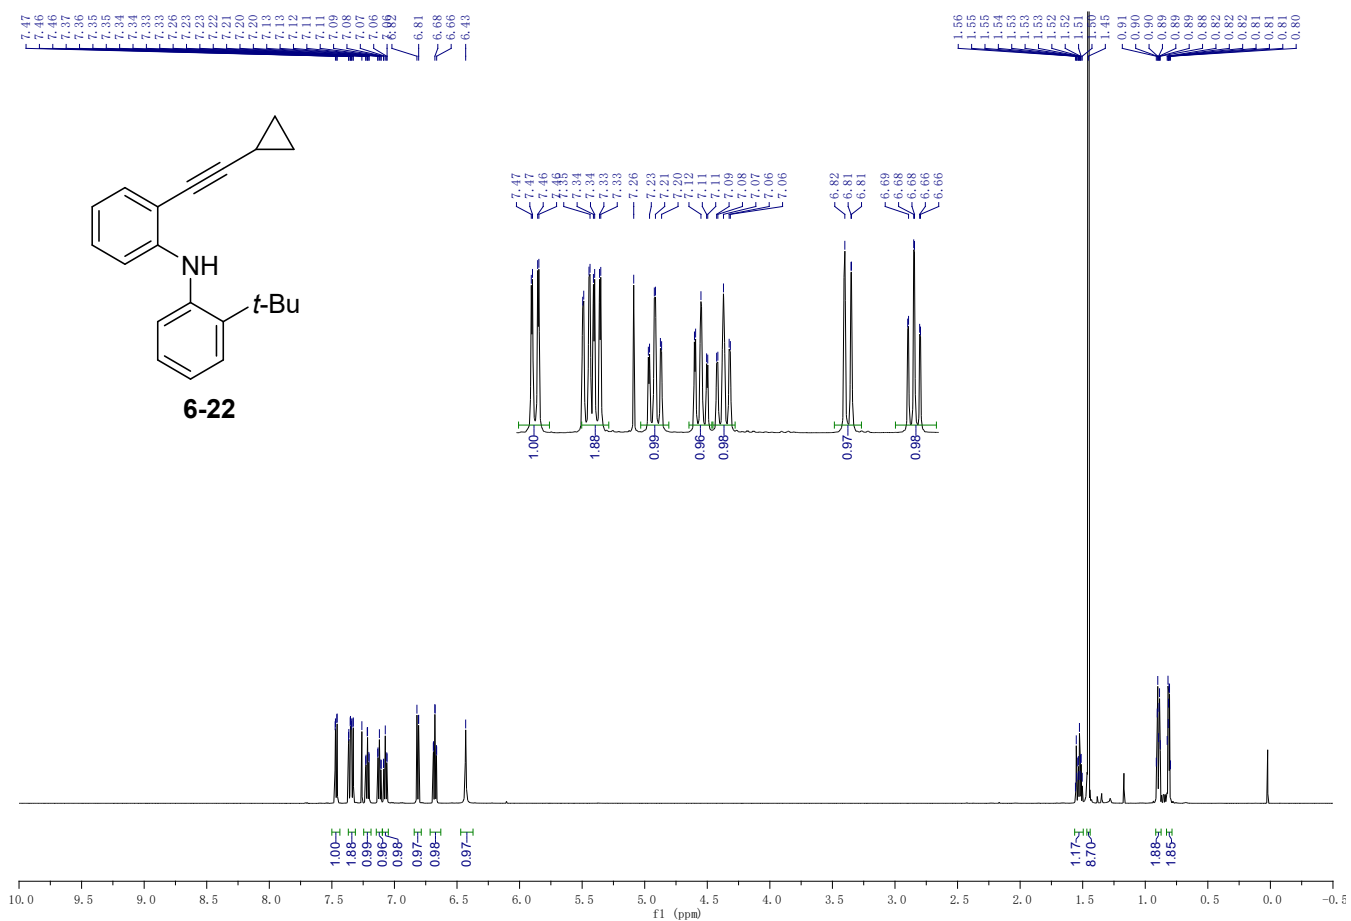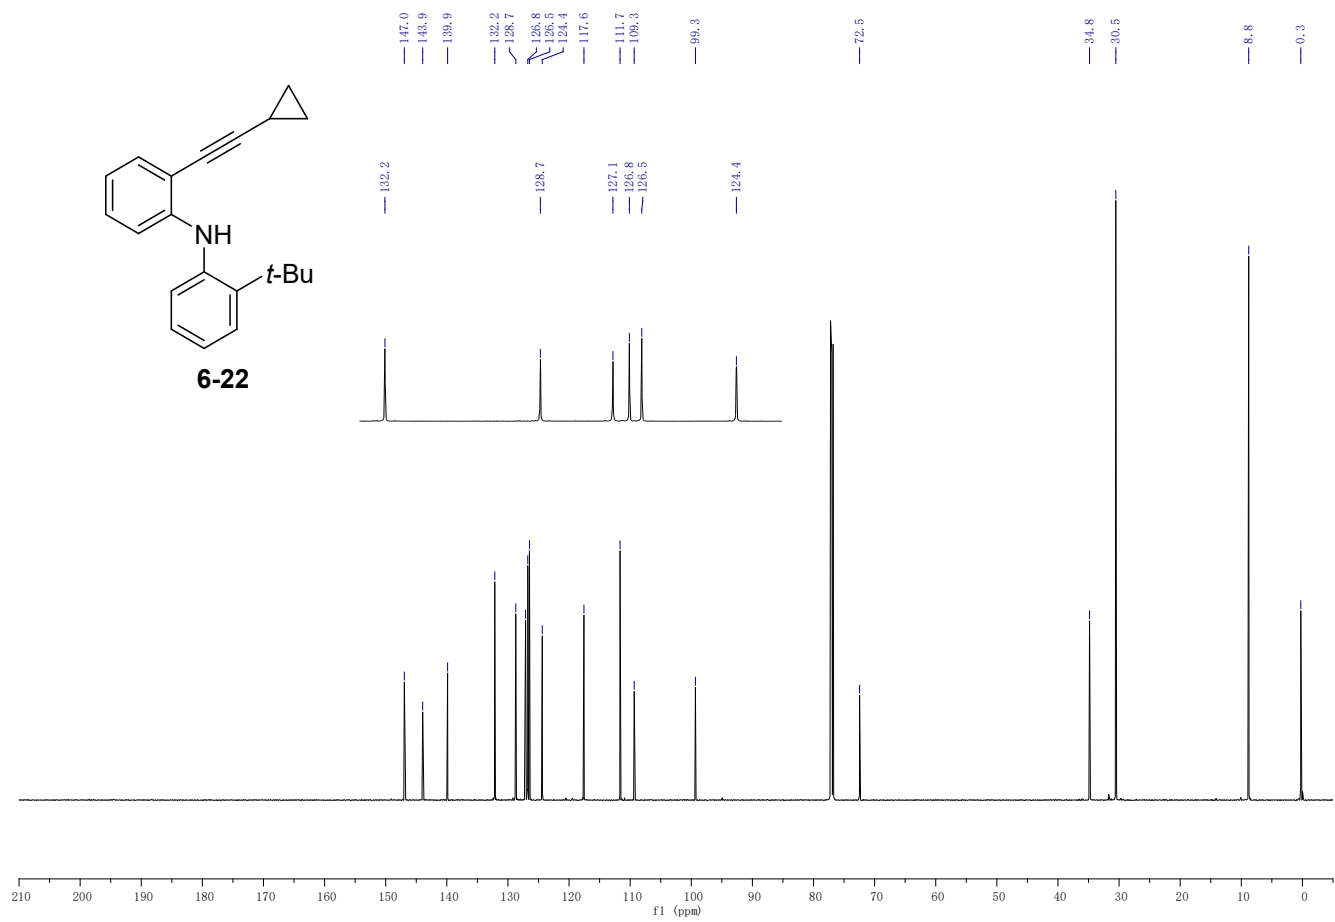

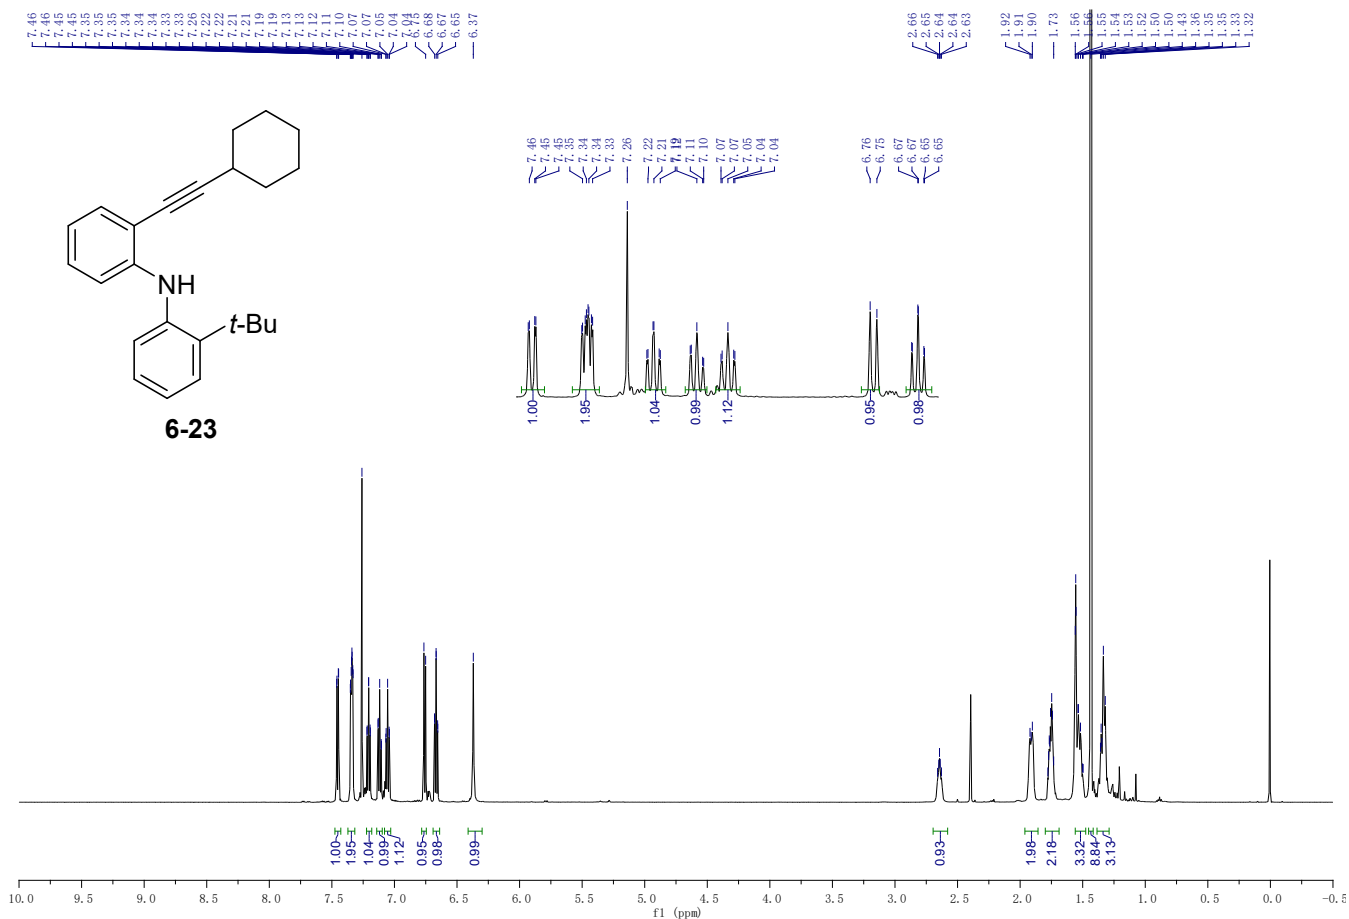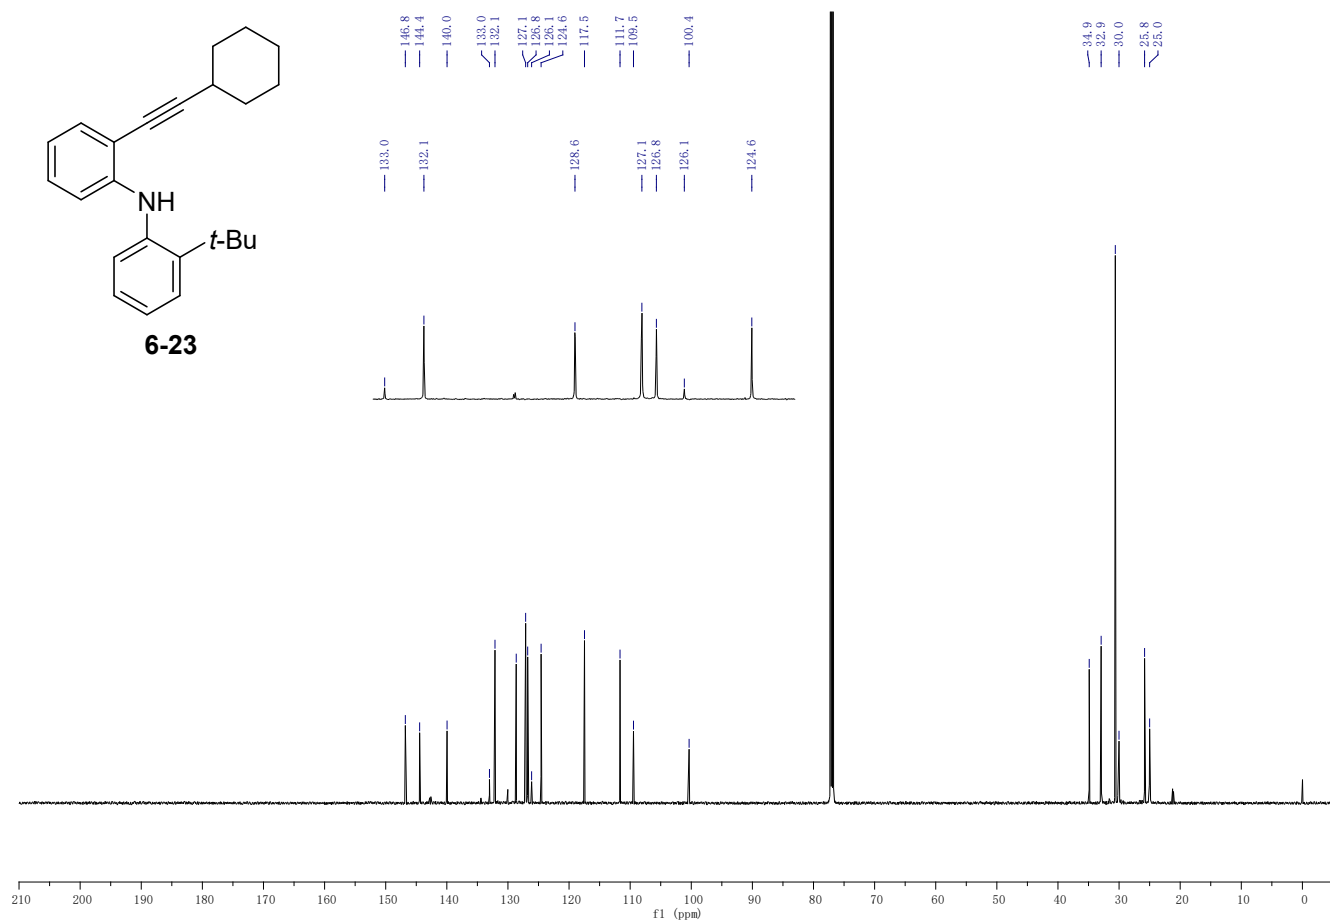

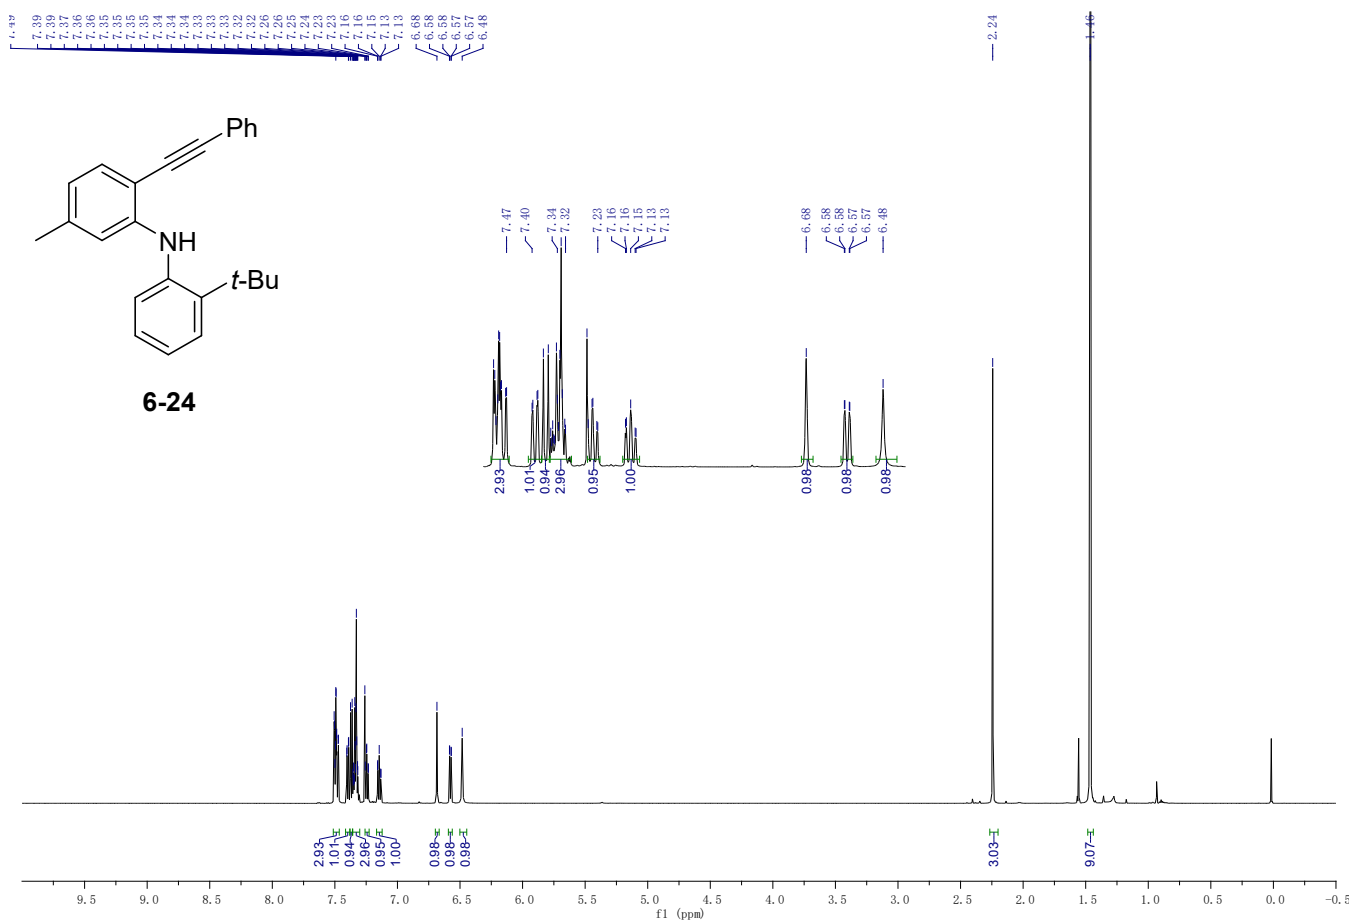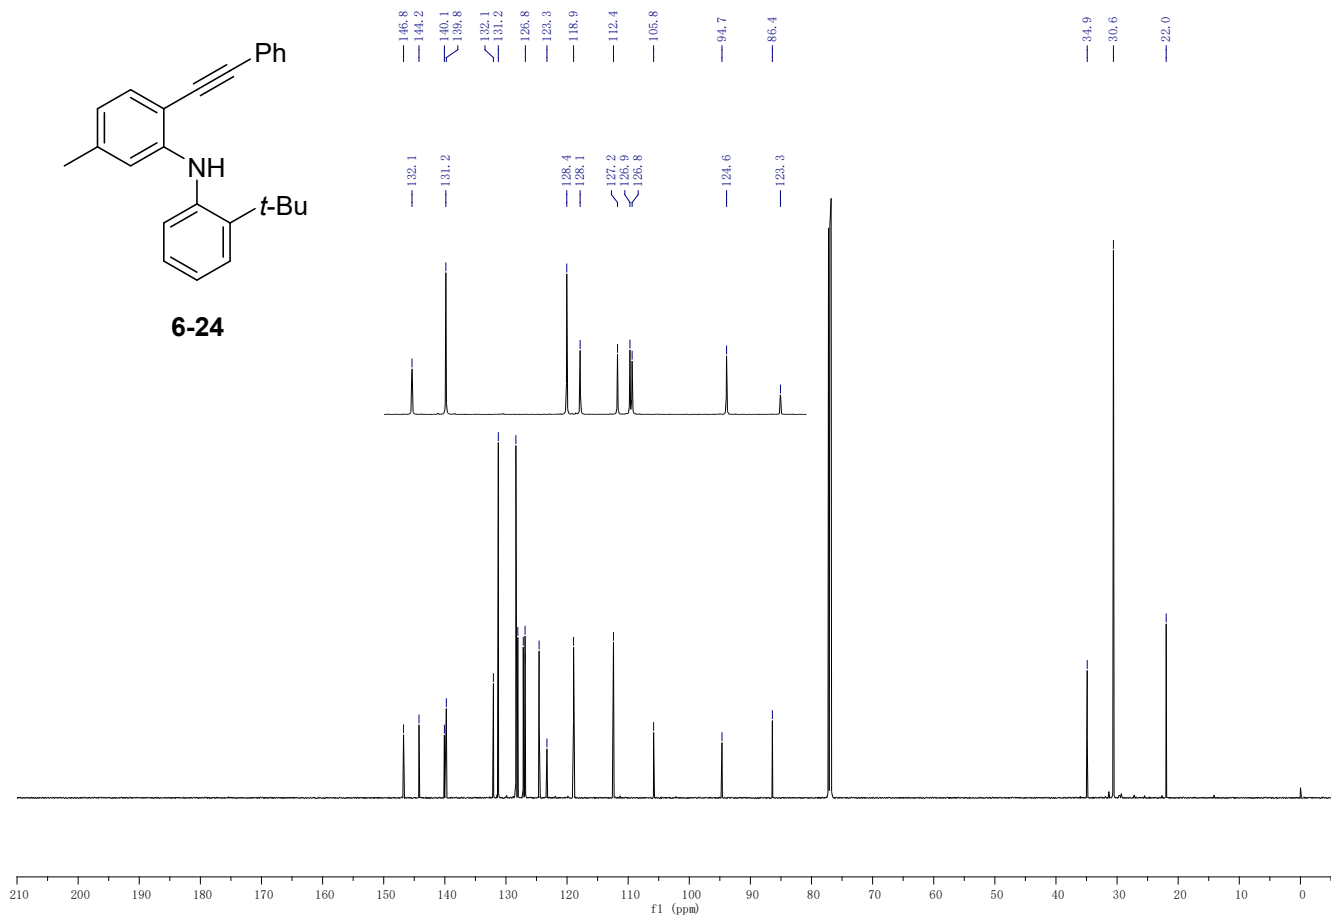

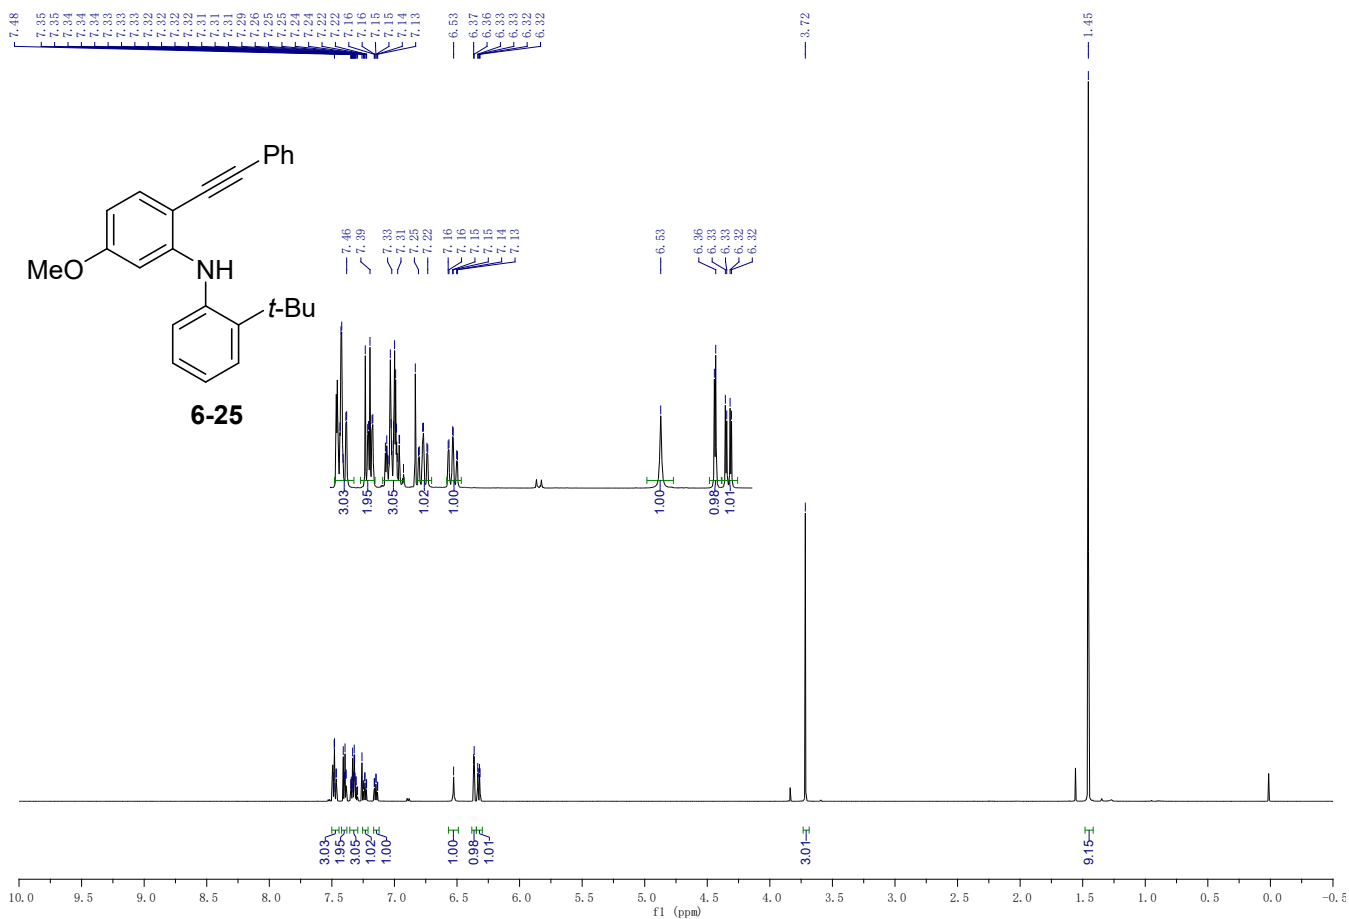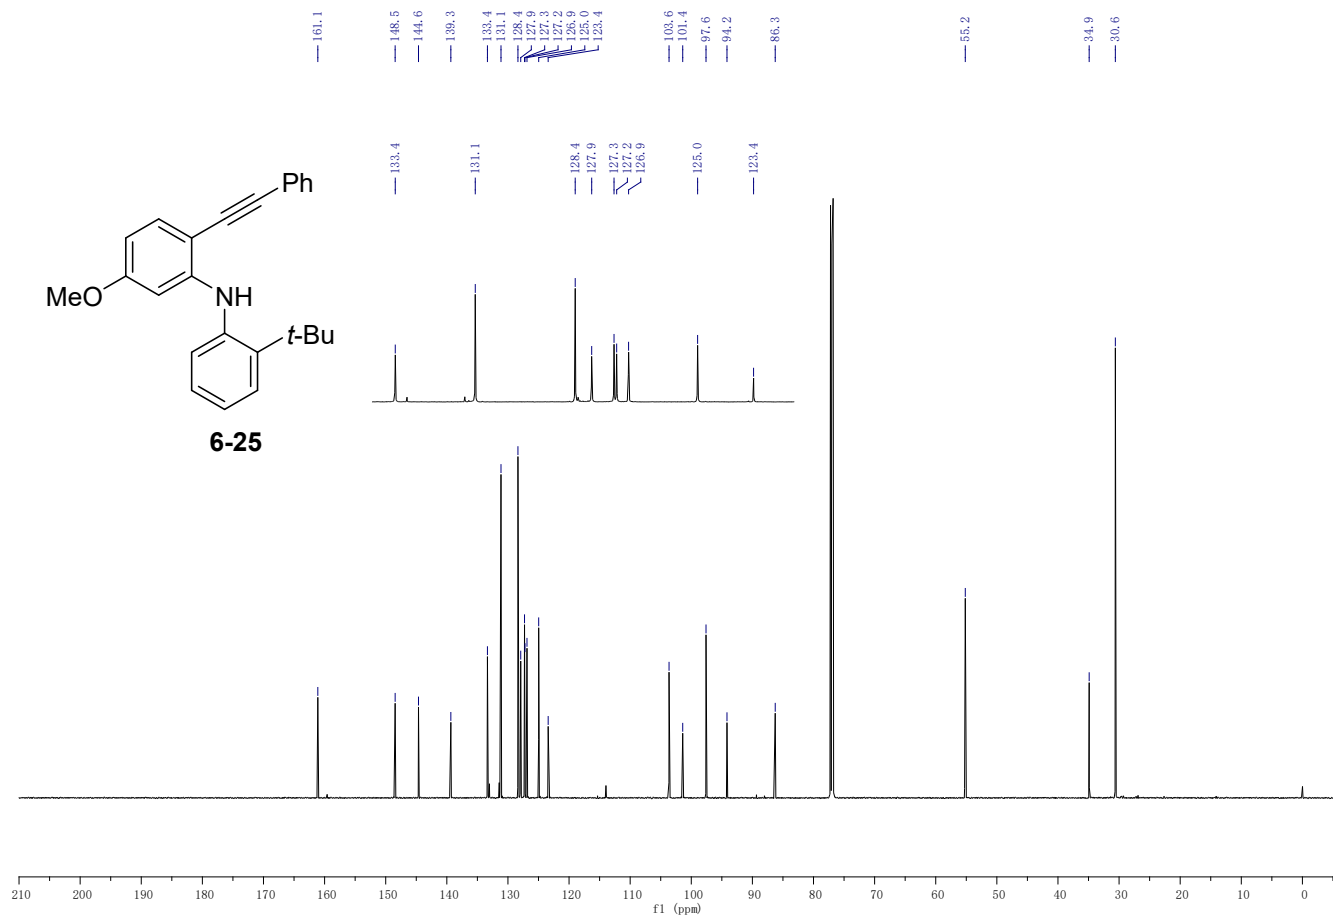

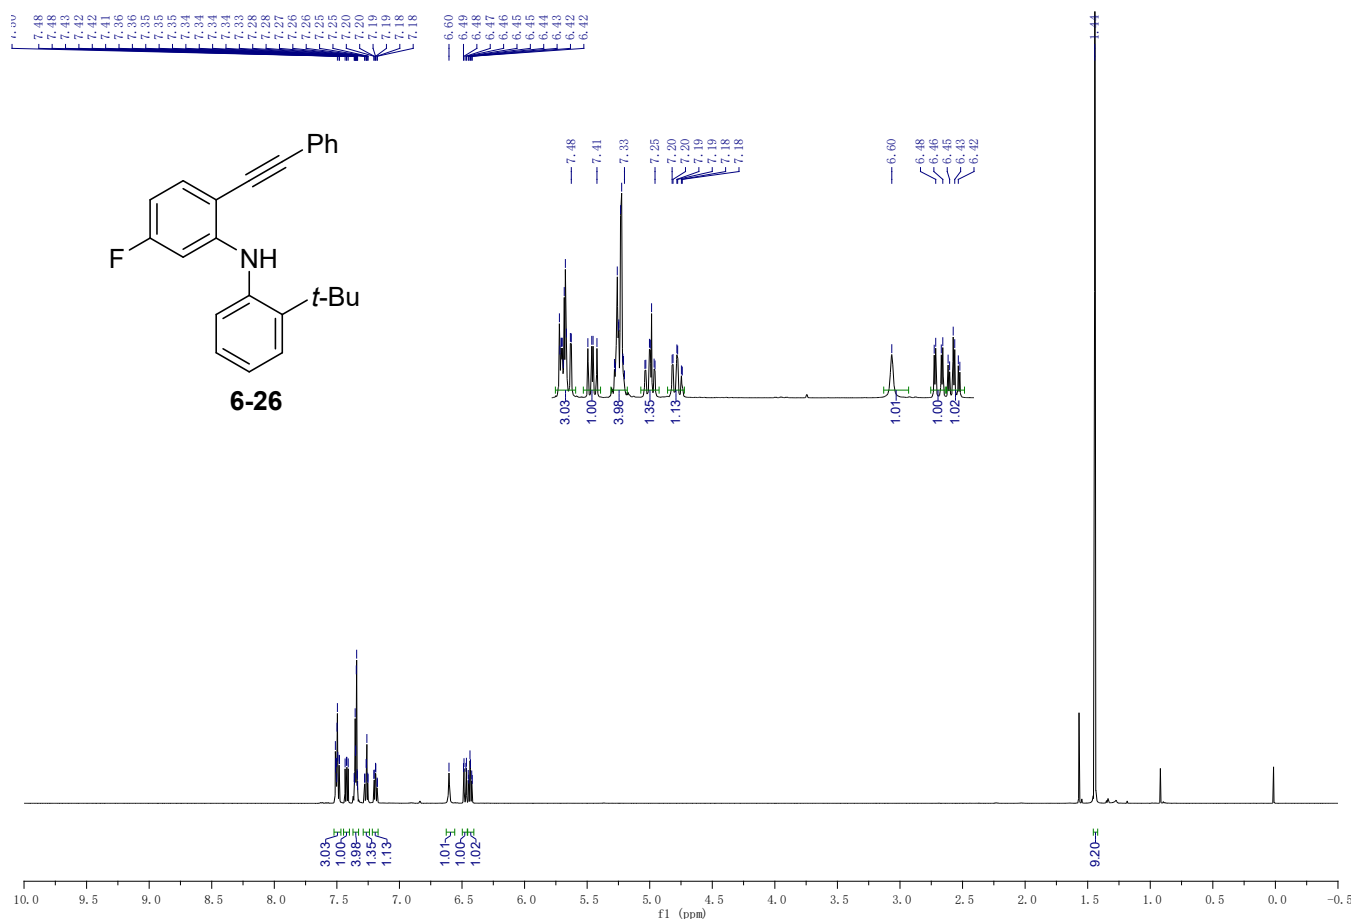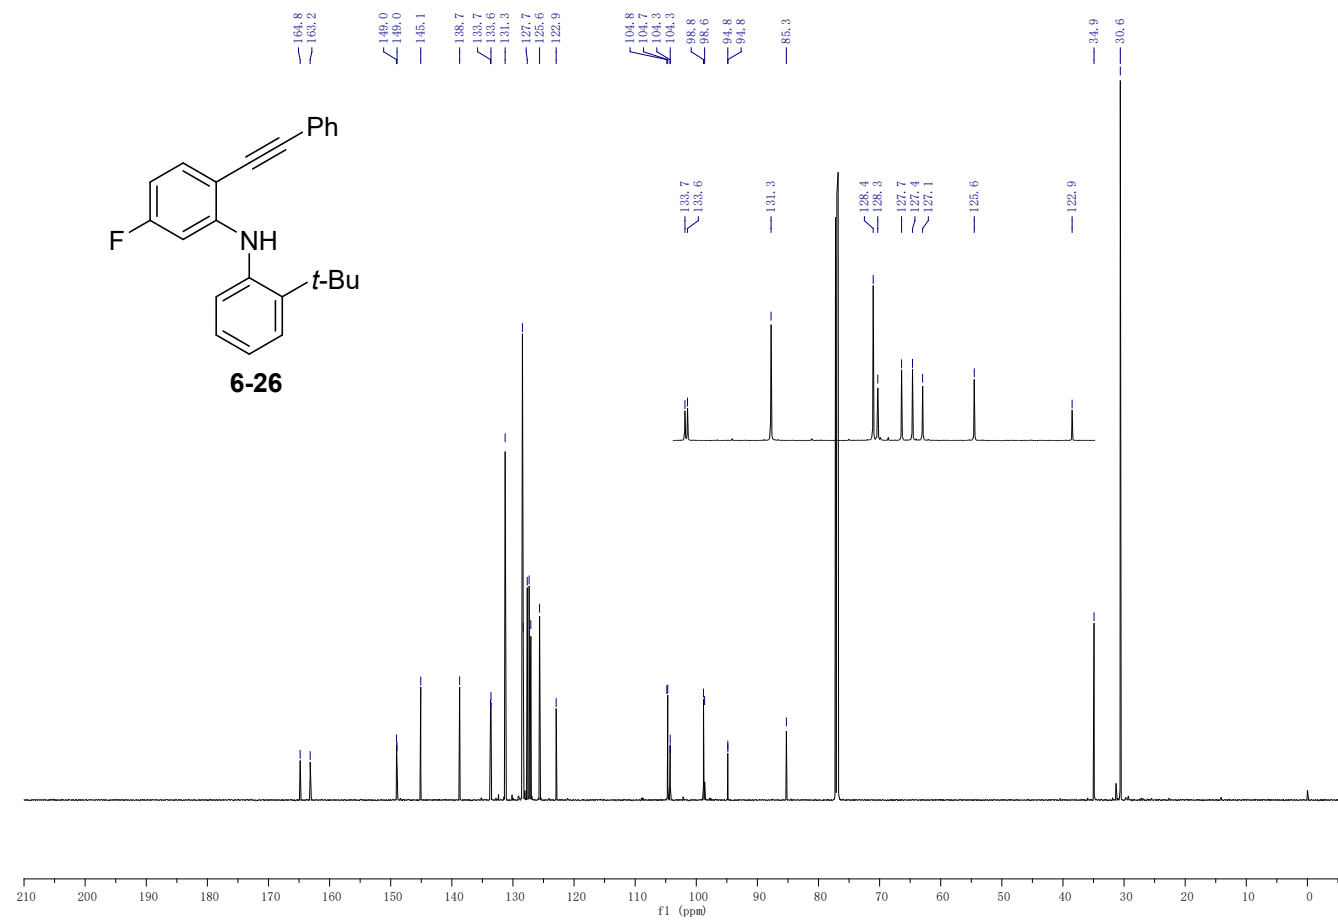

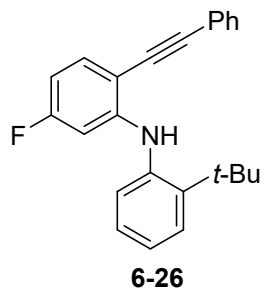

108.4

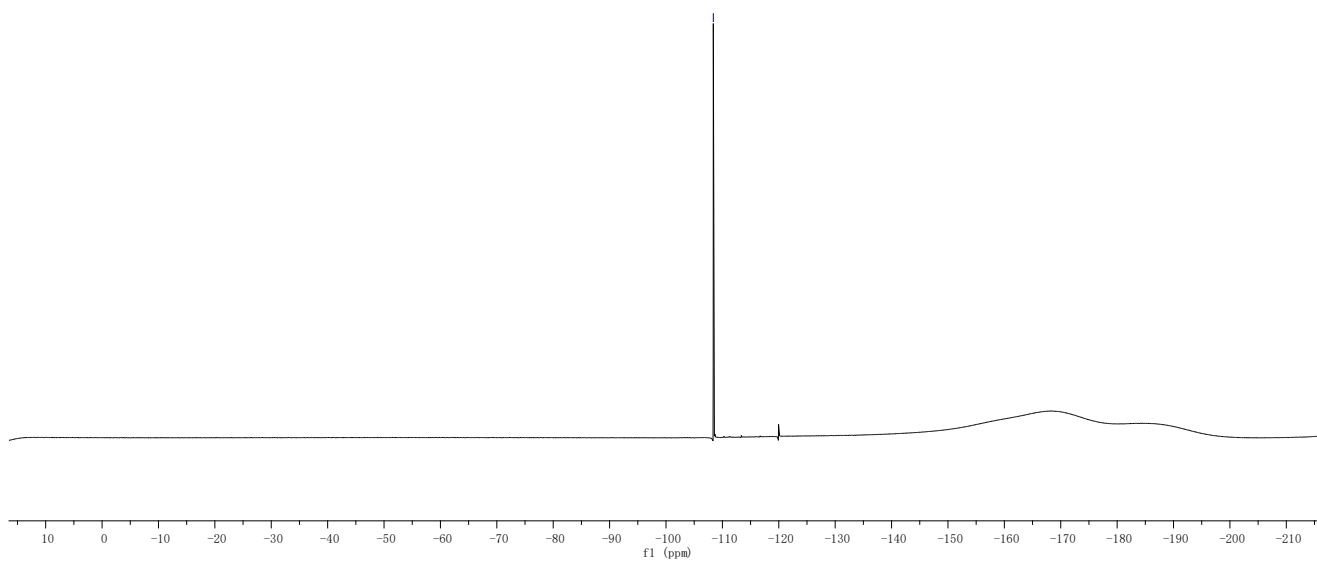



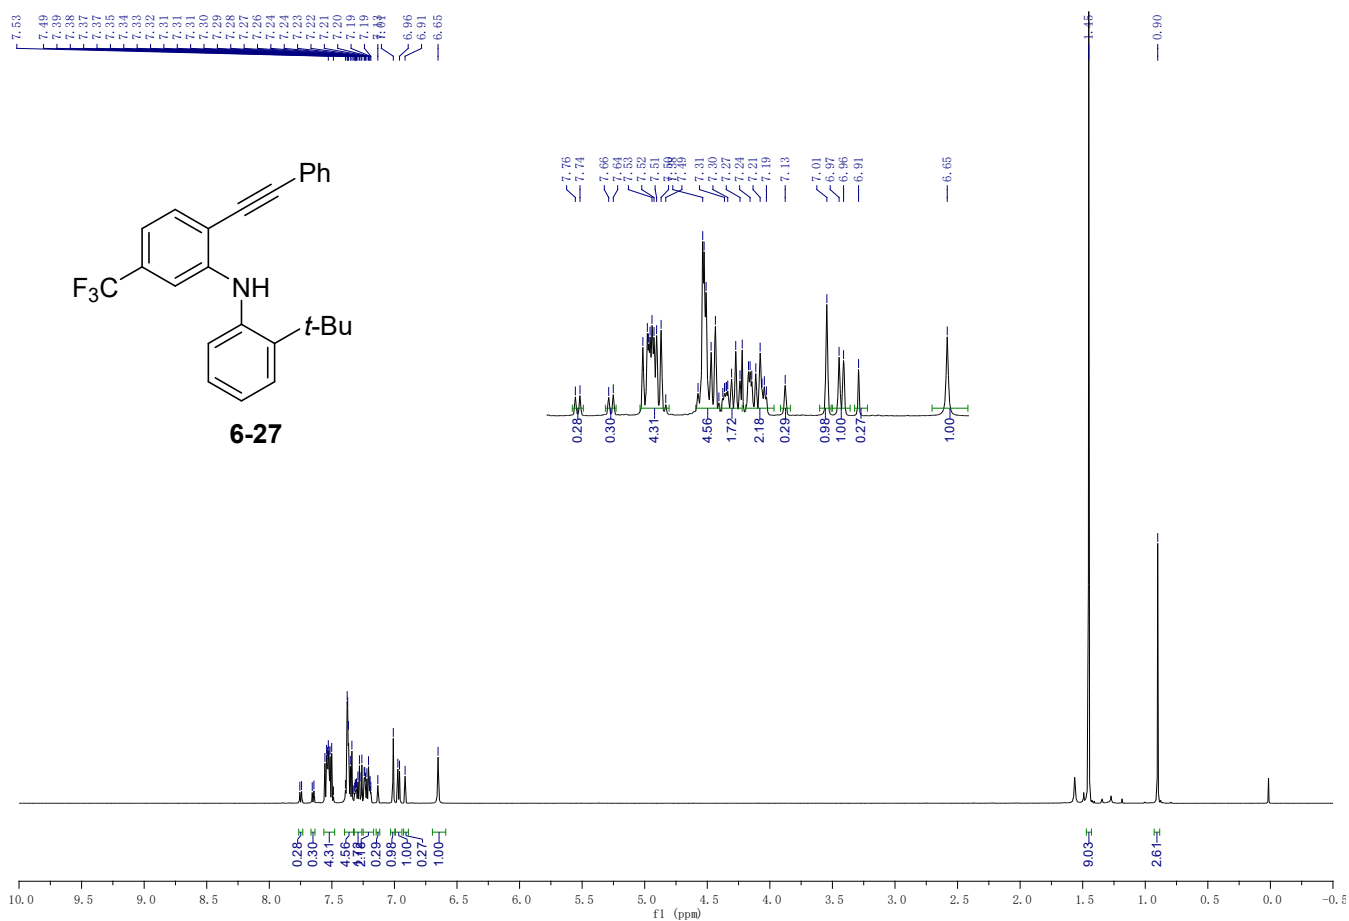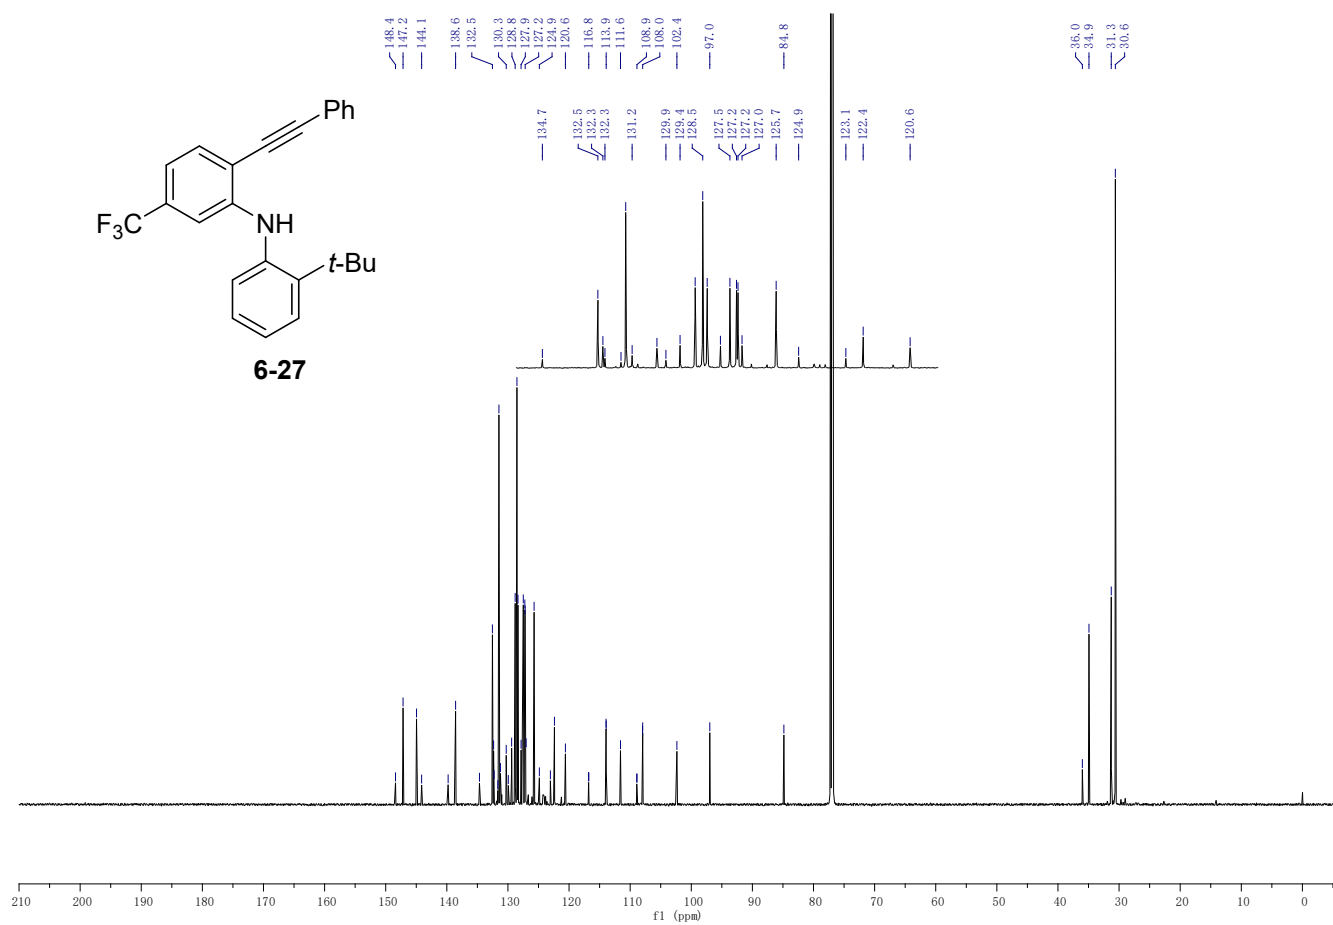

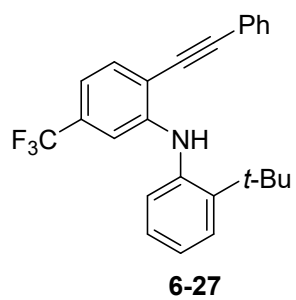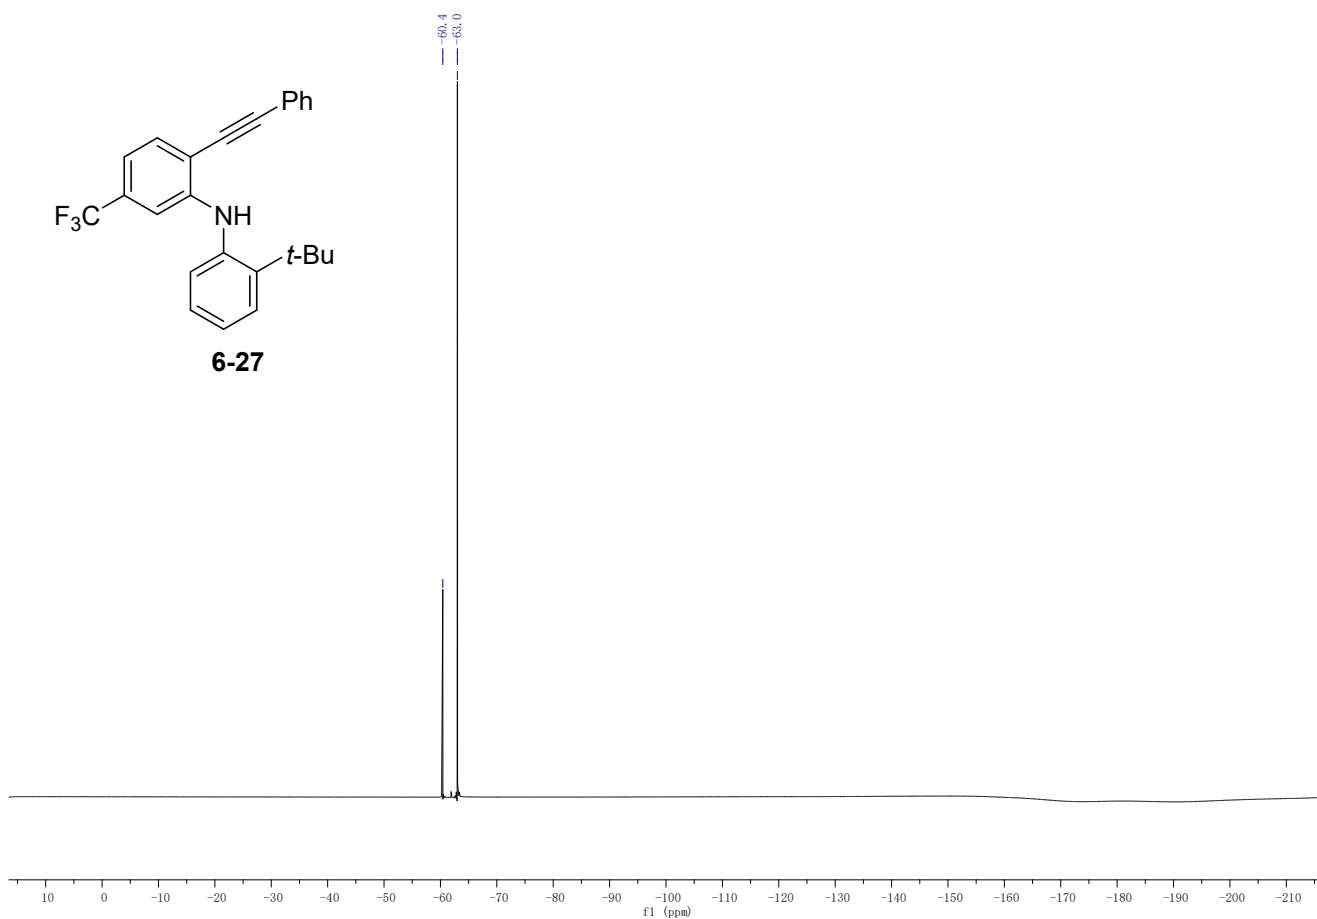

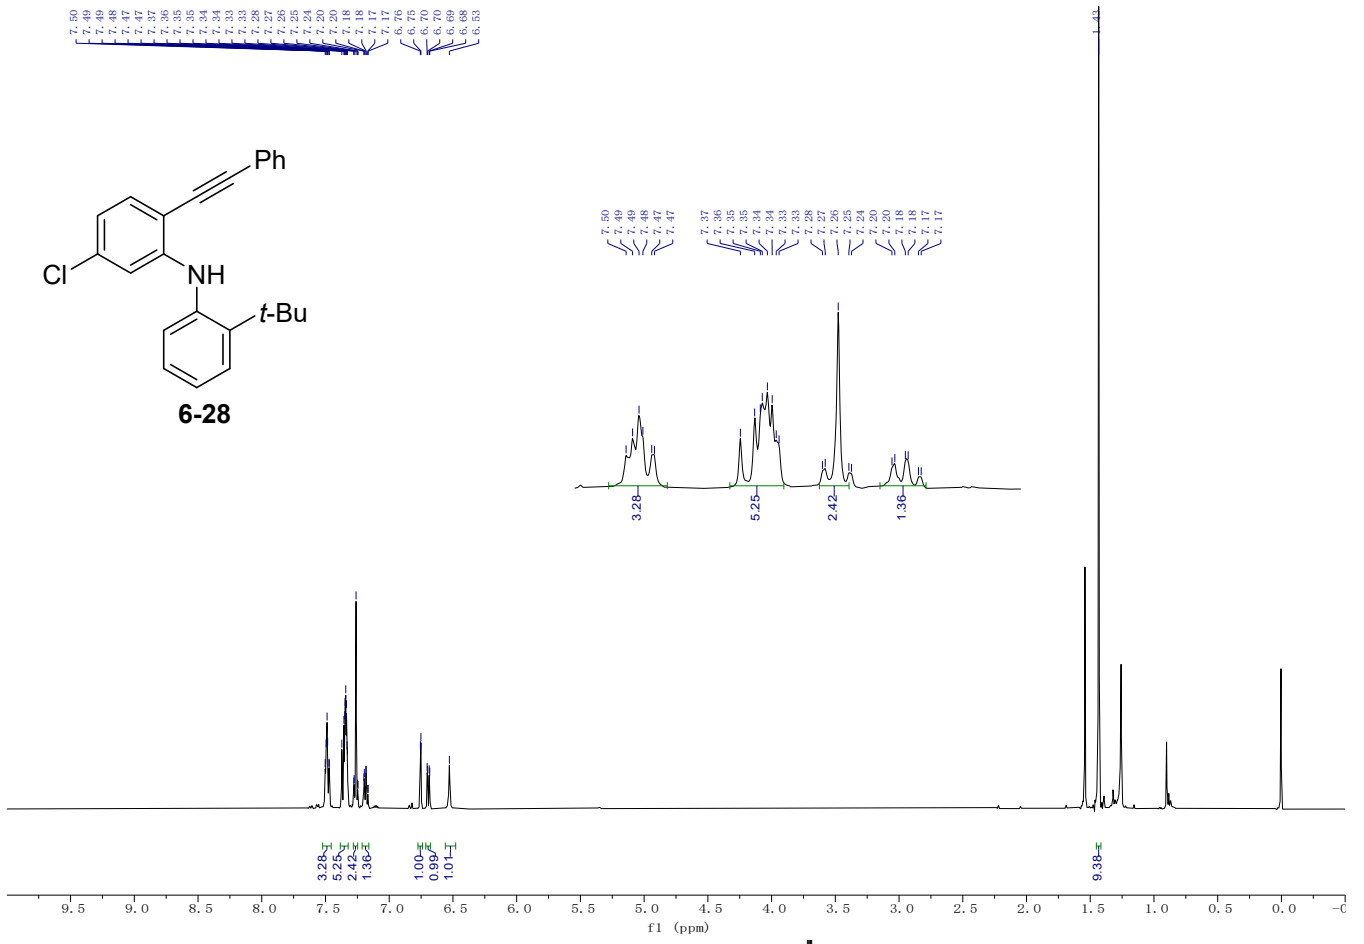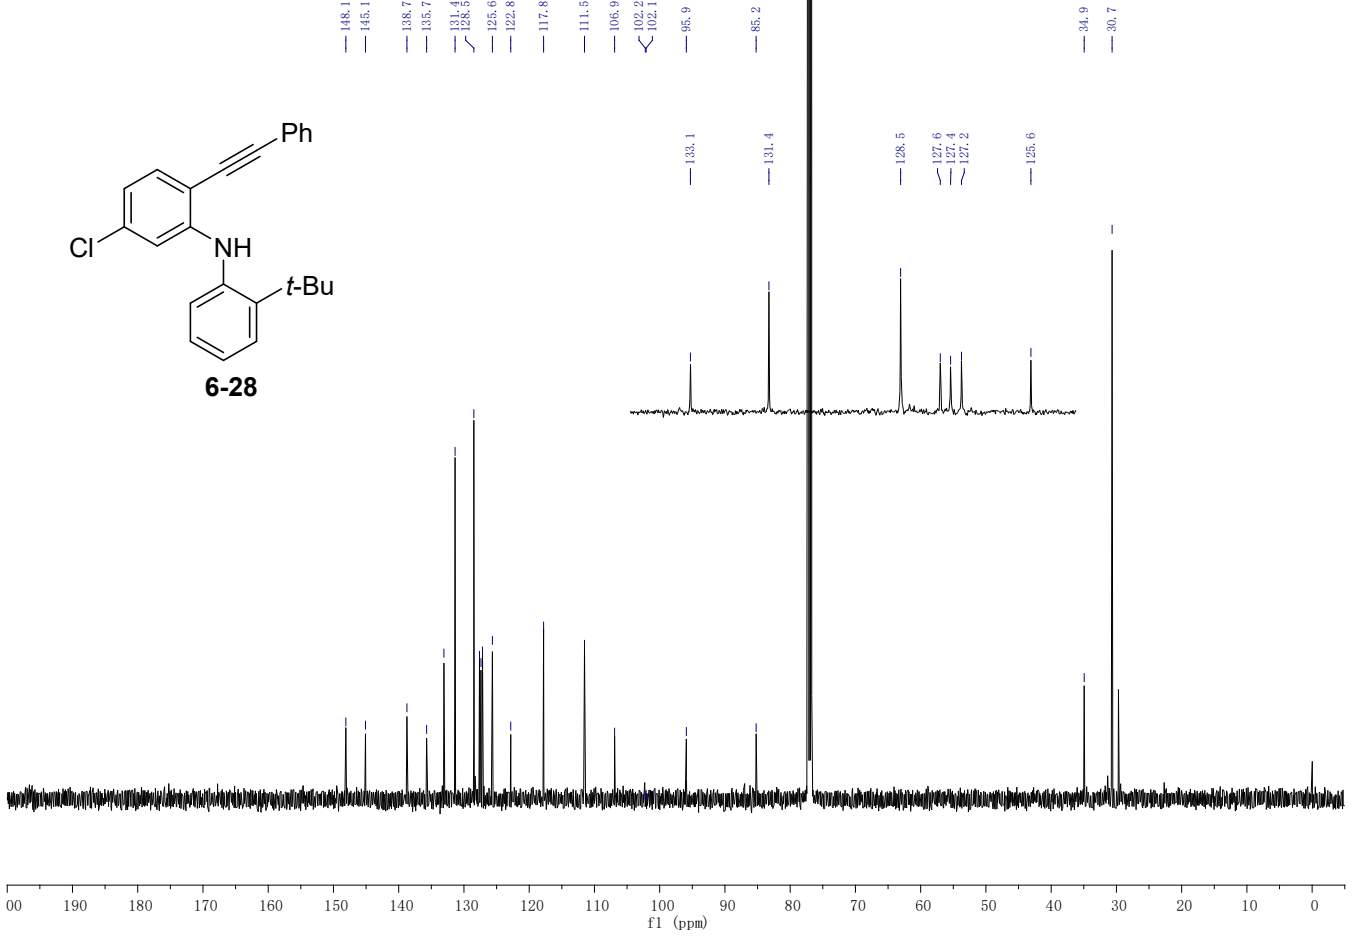

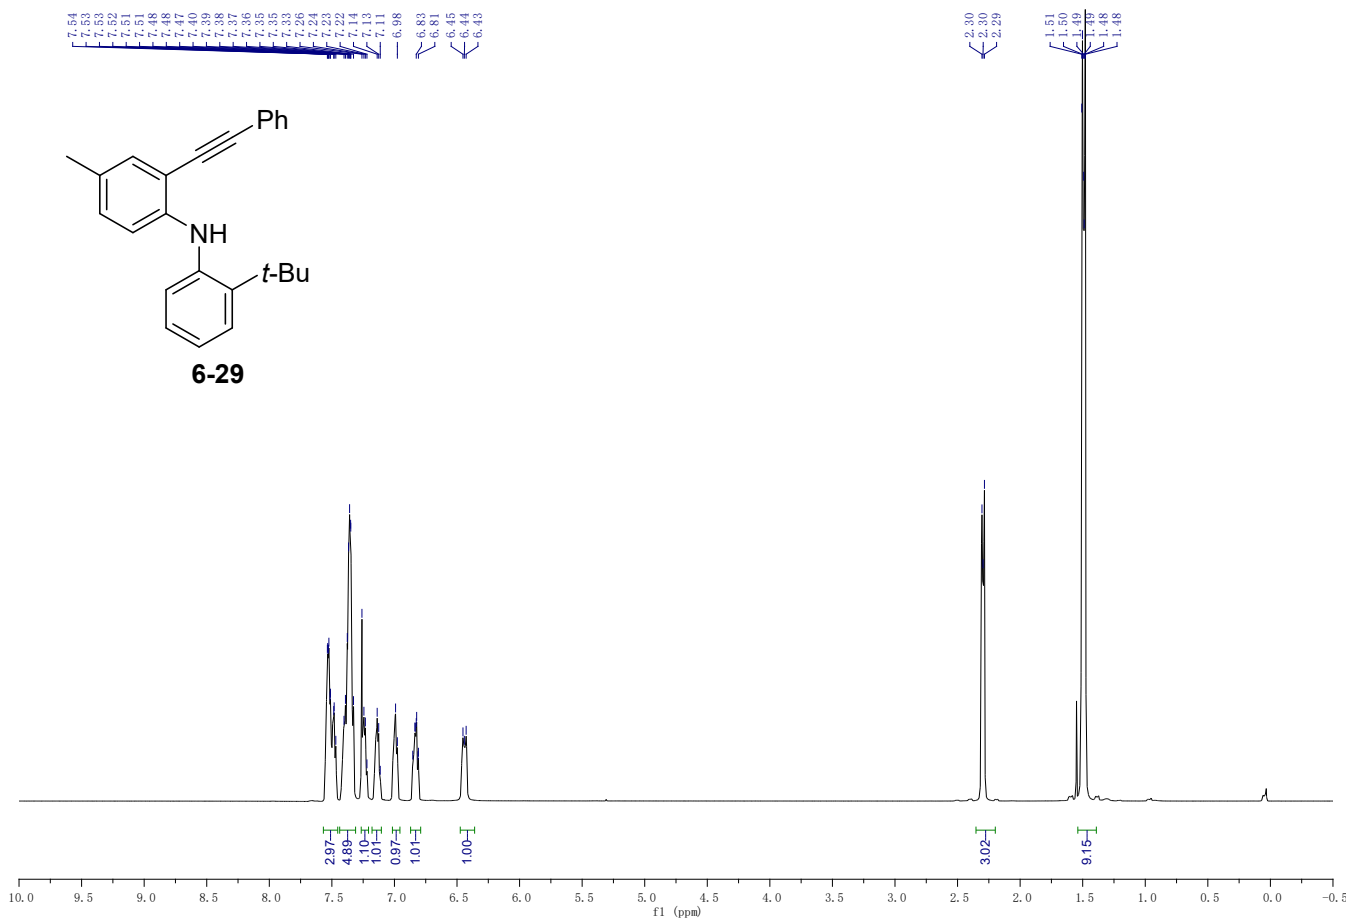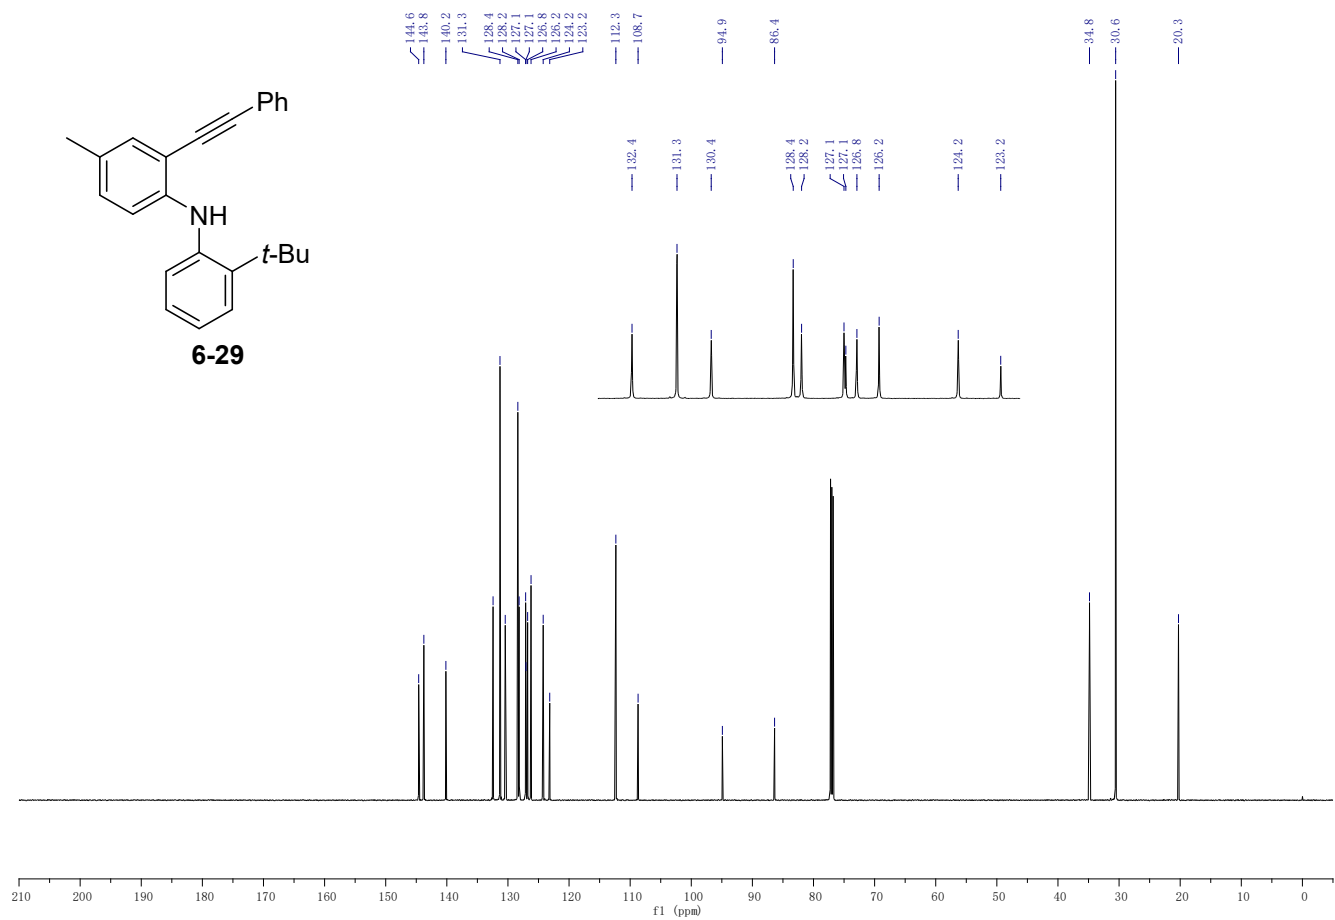

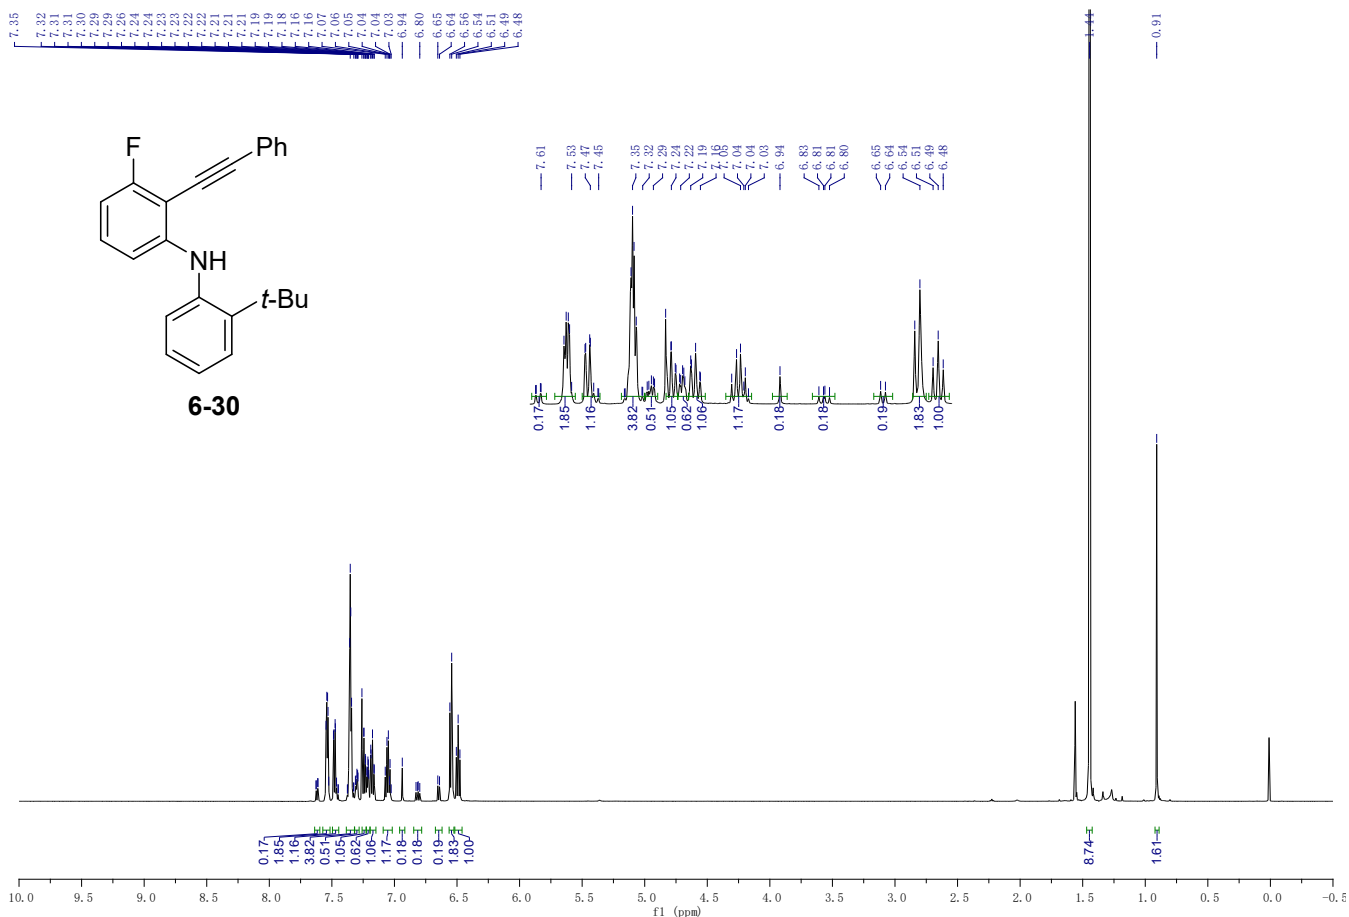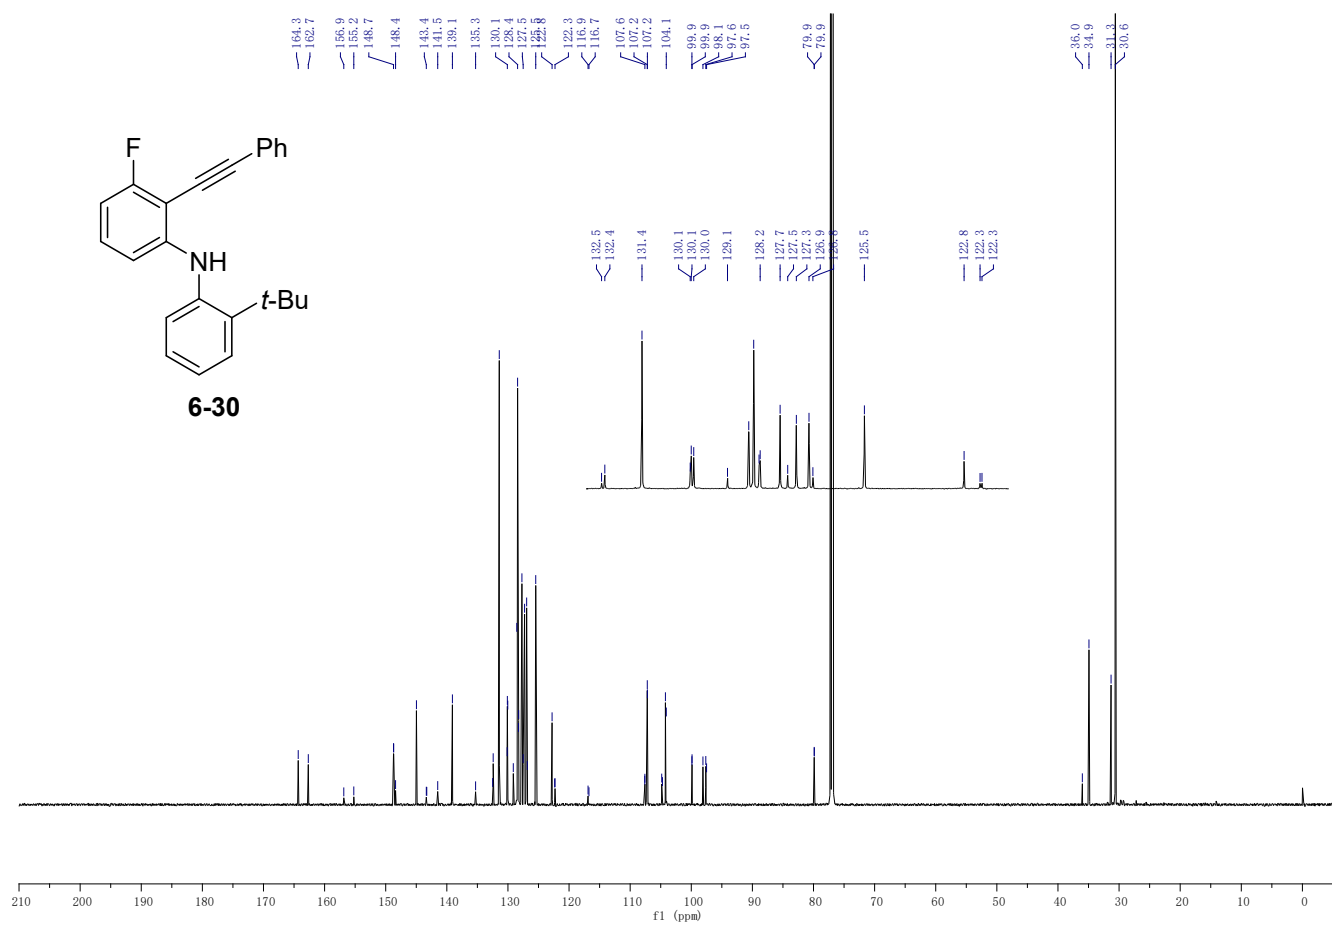

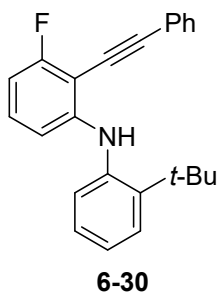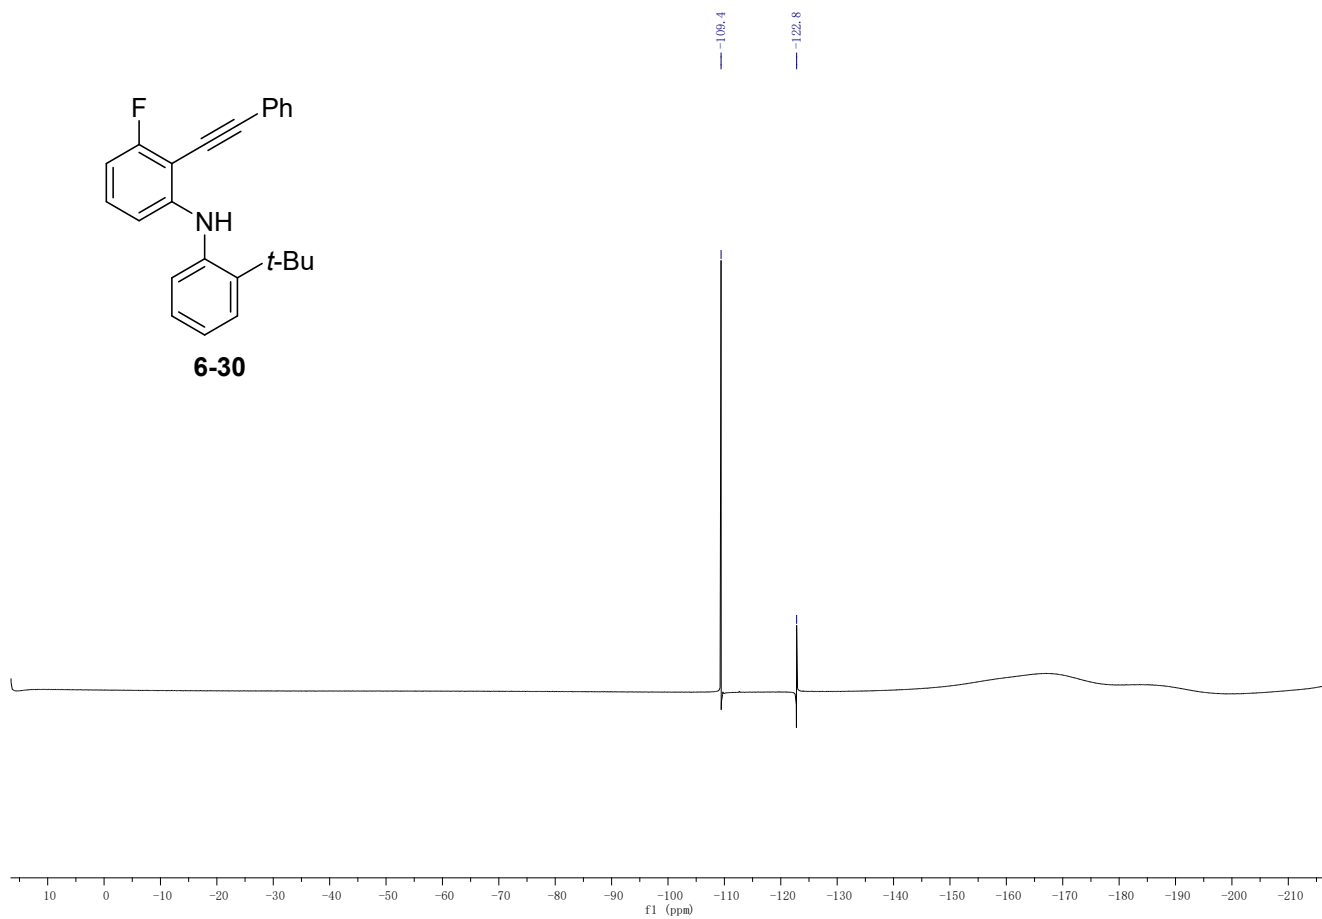

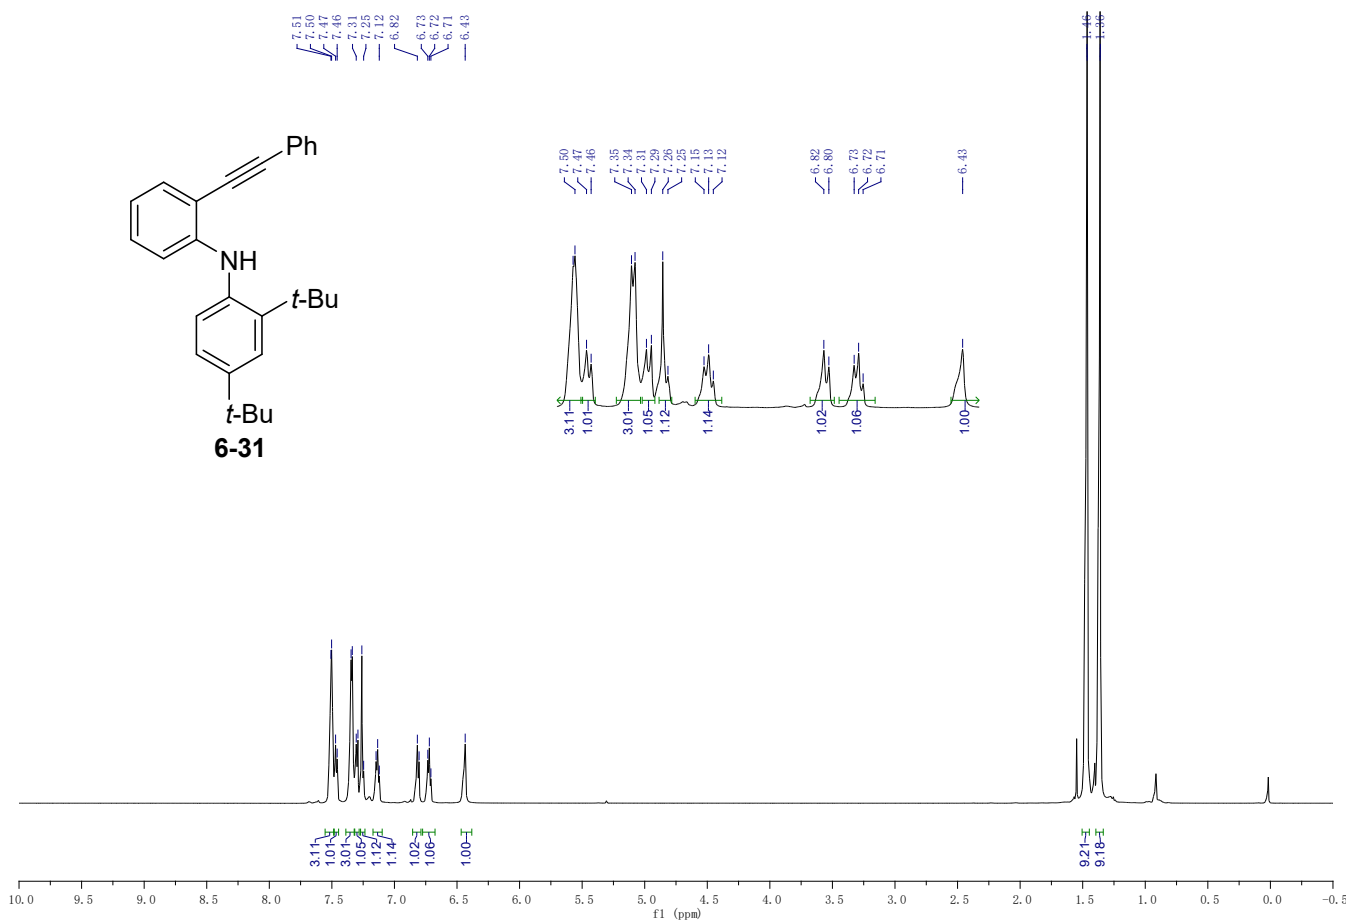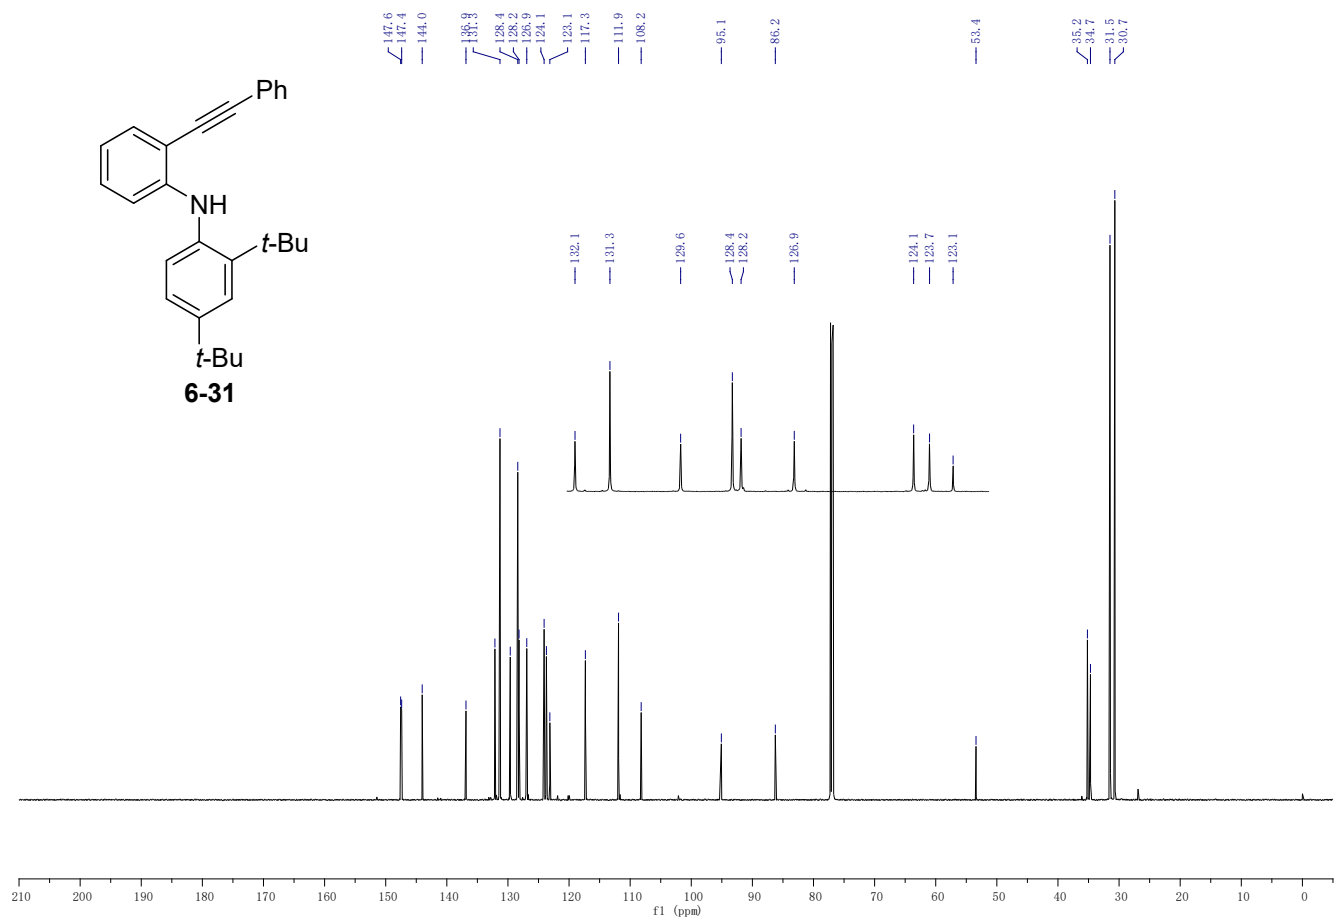

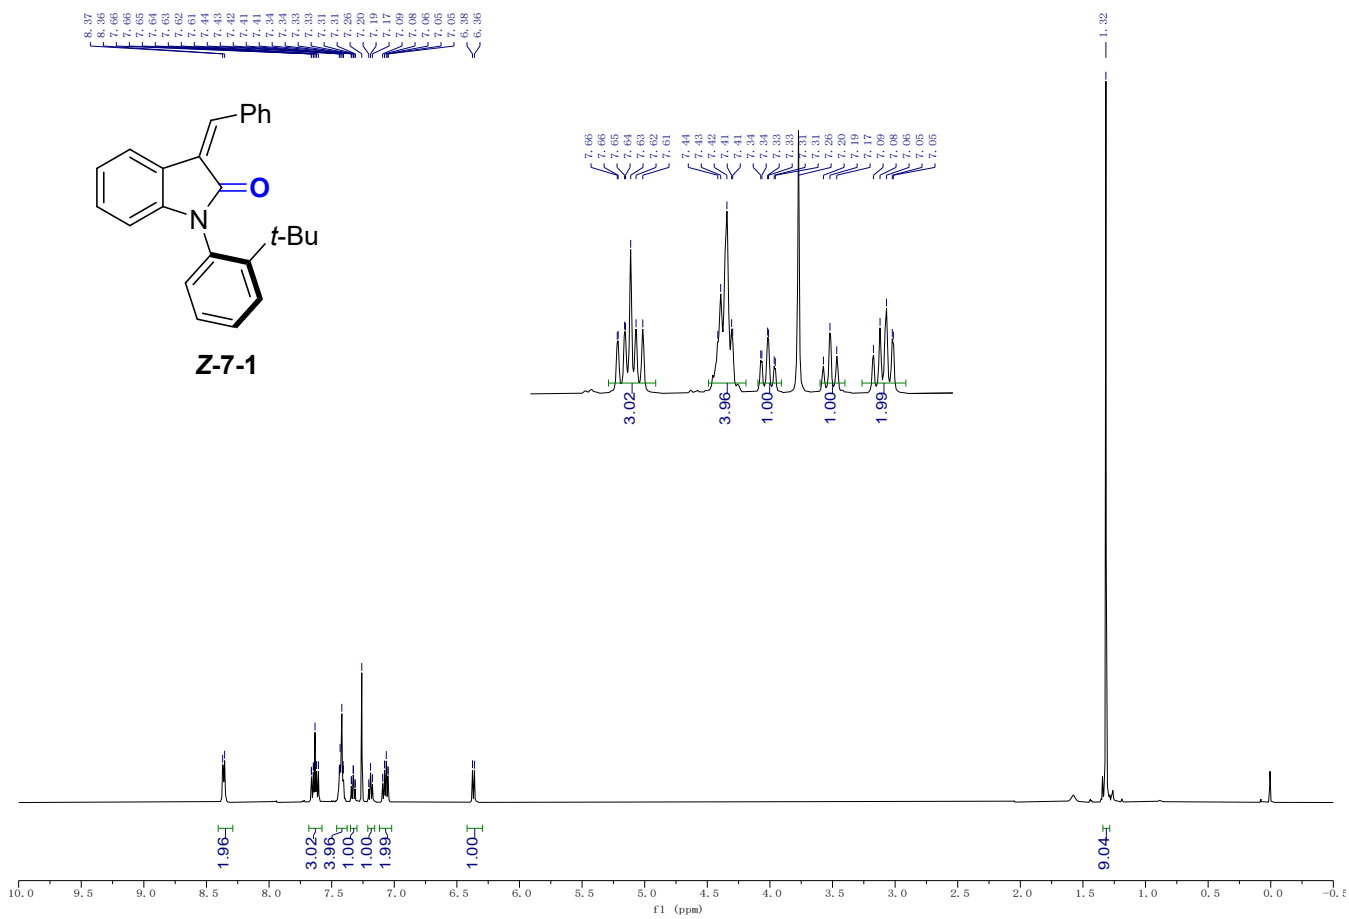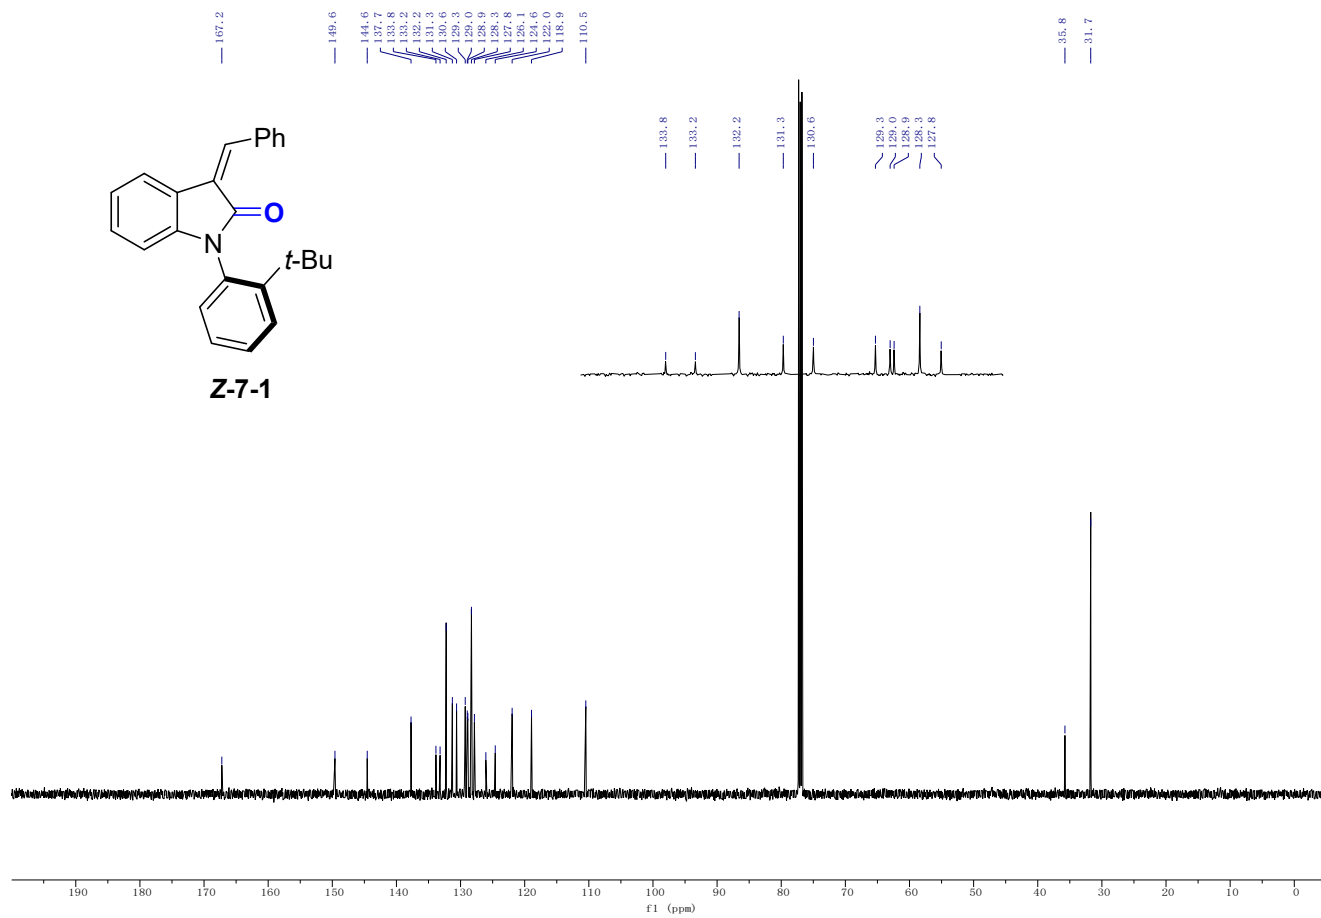



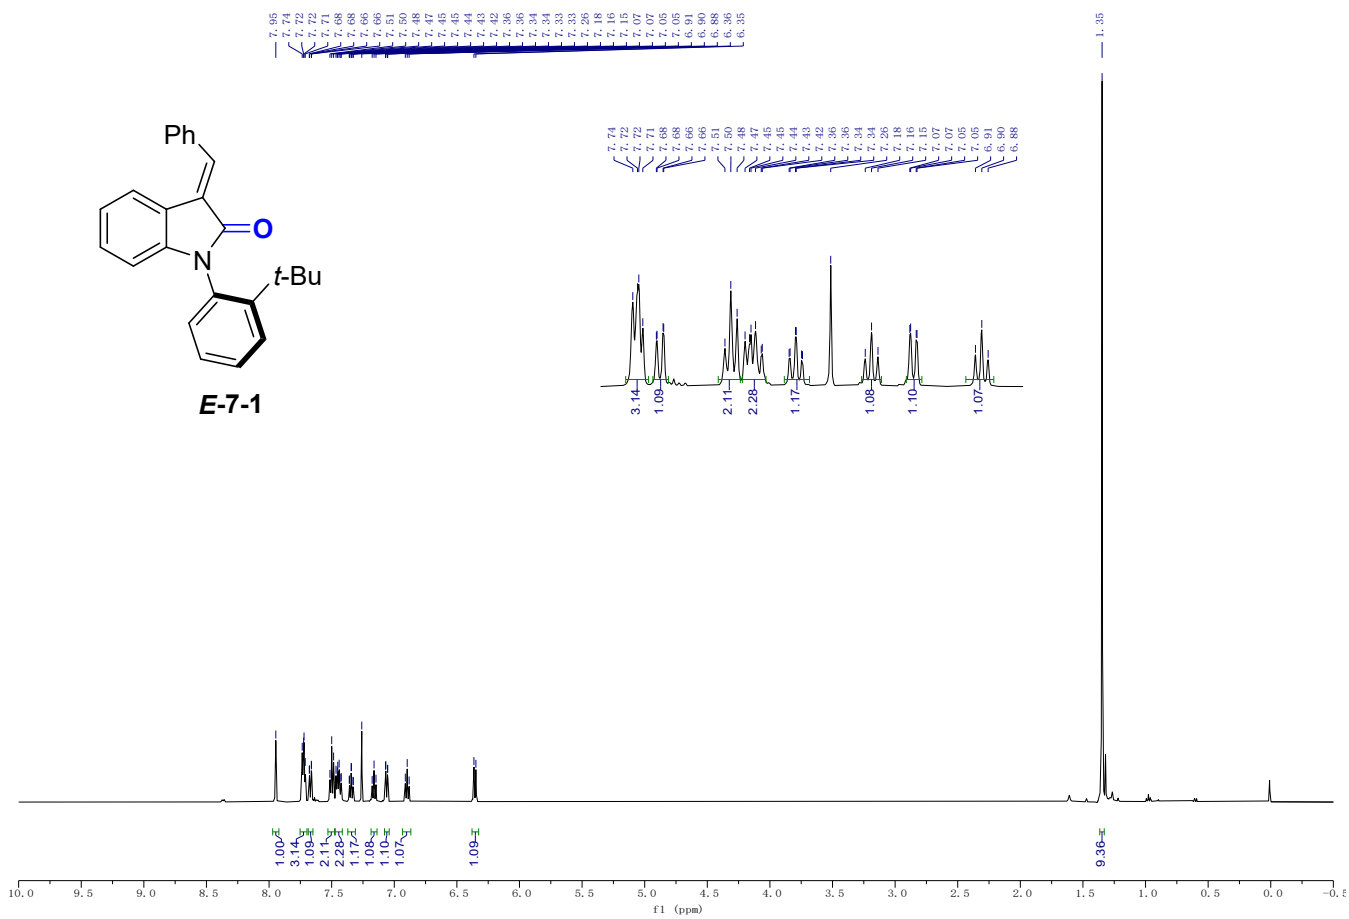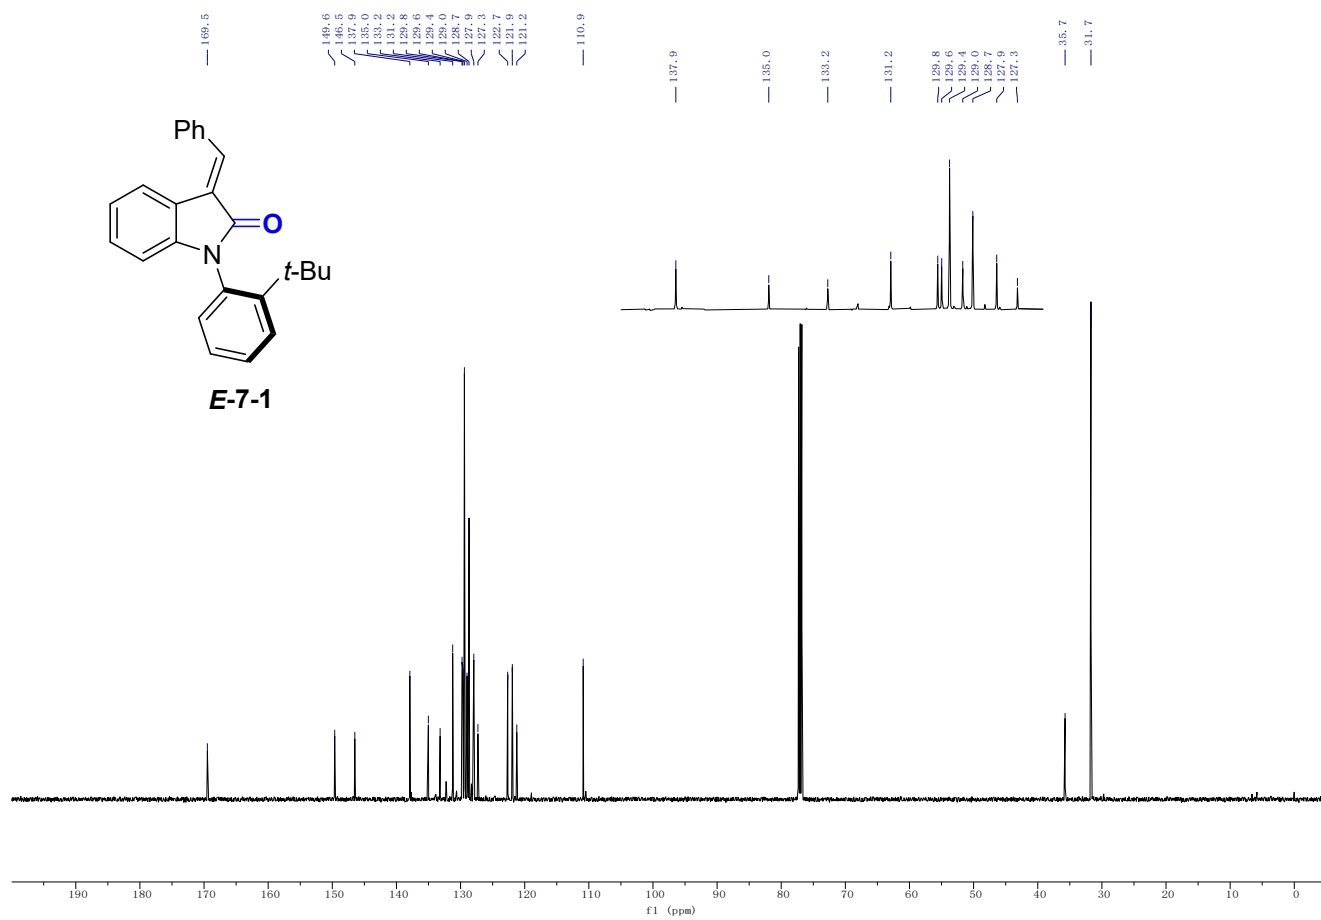

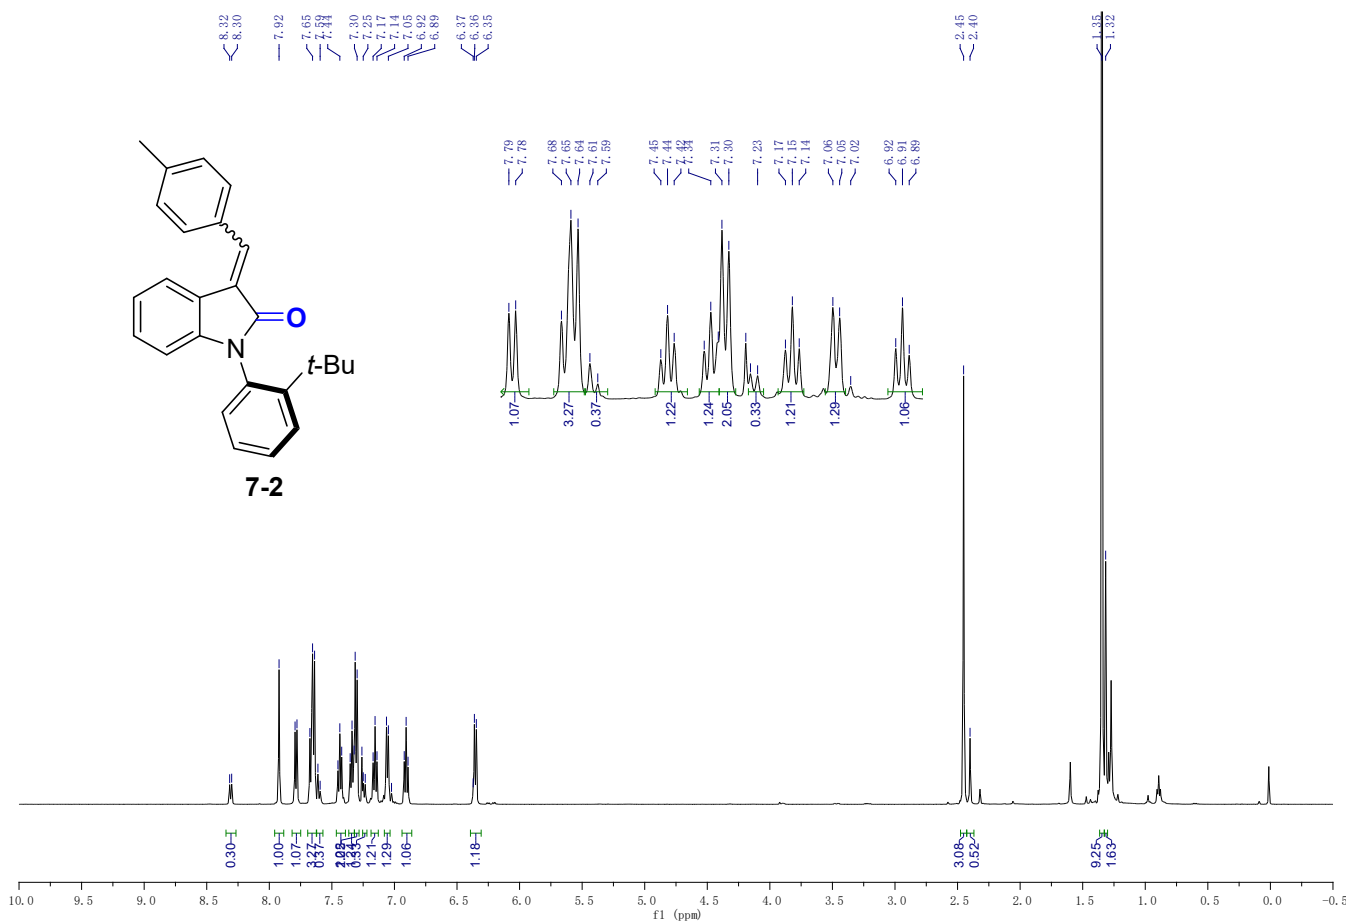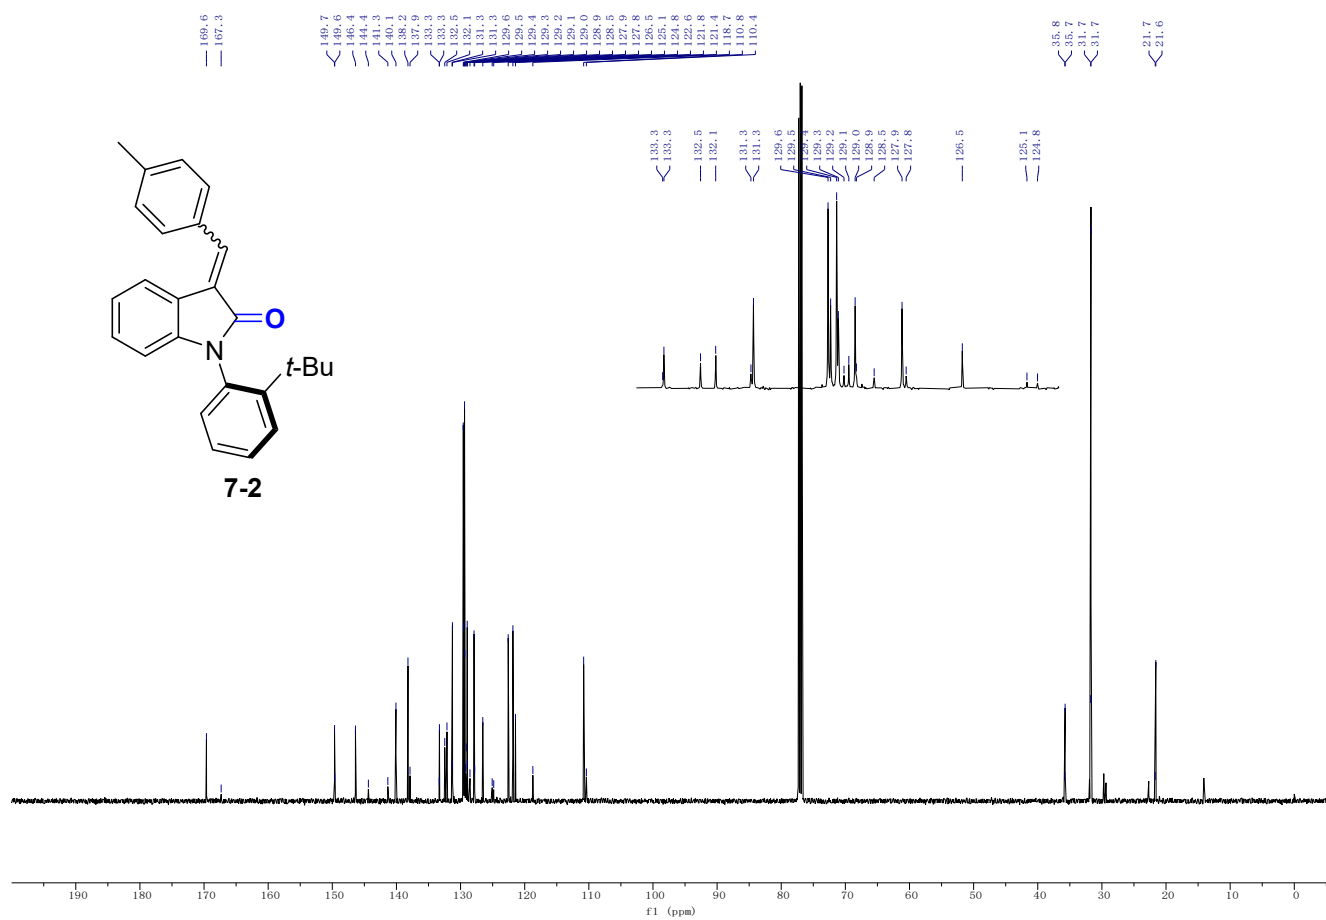

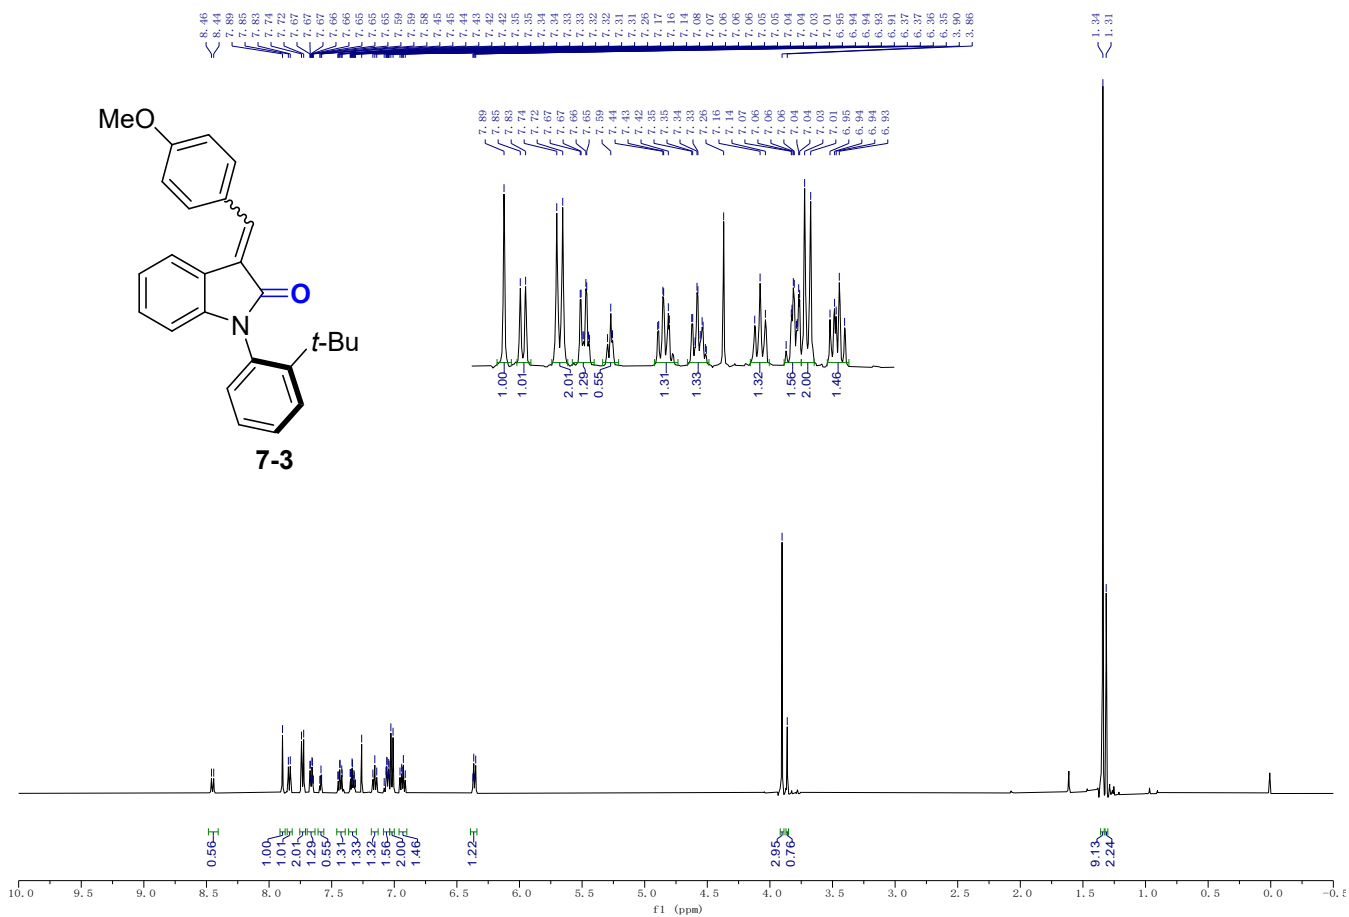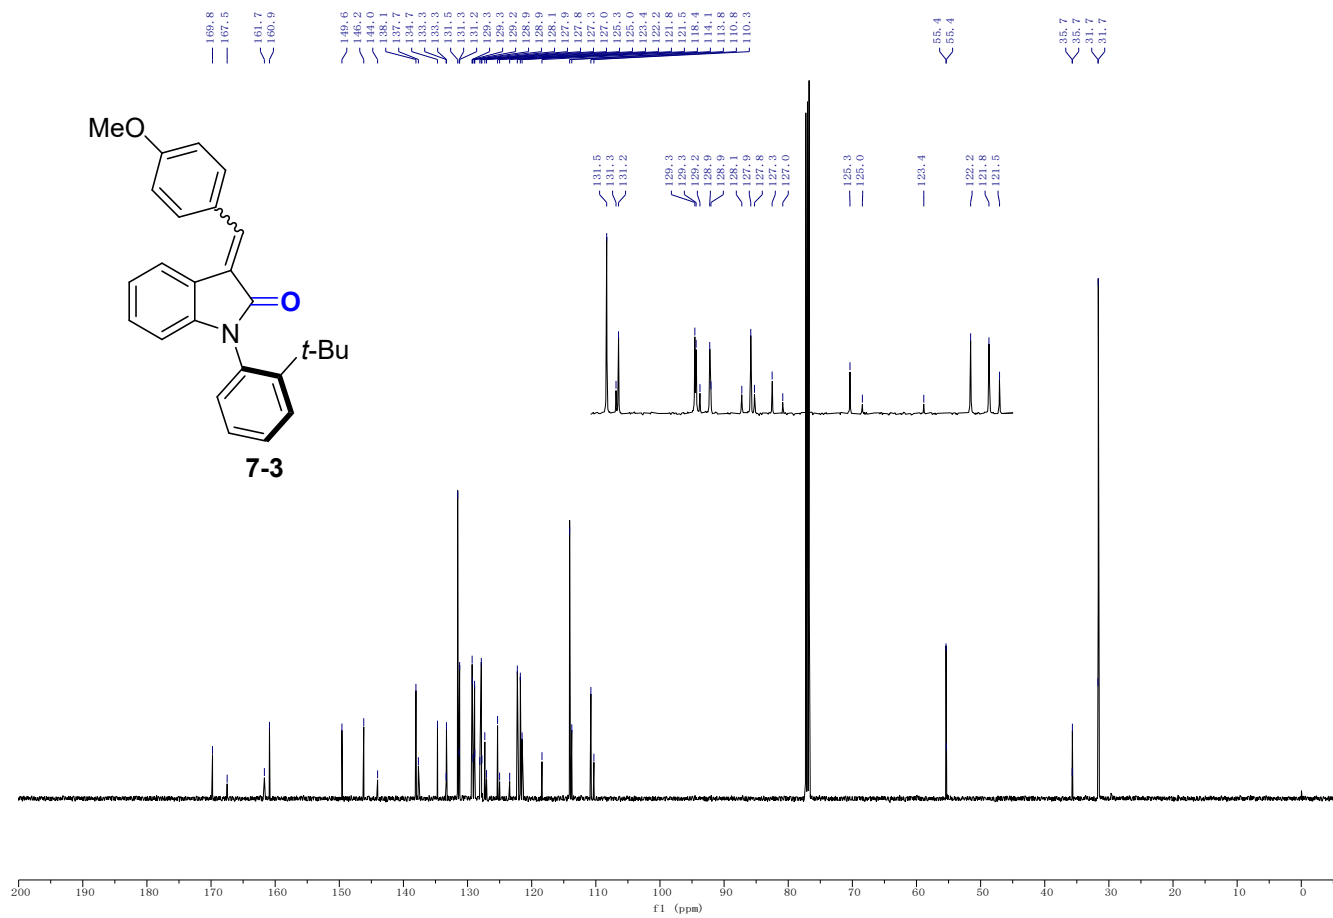

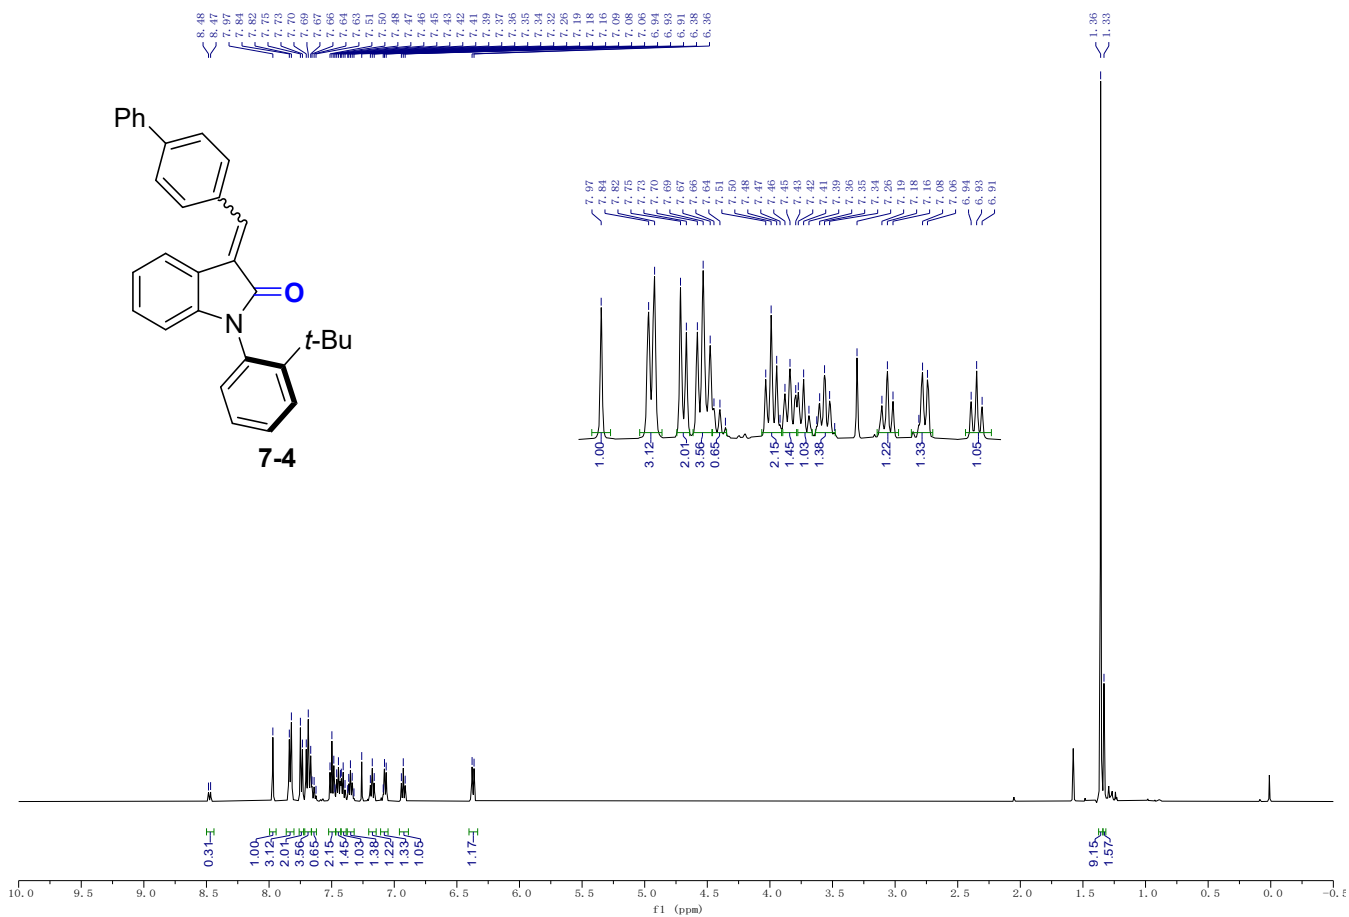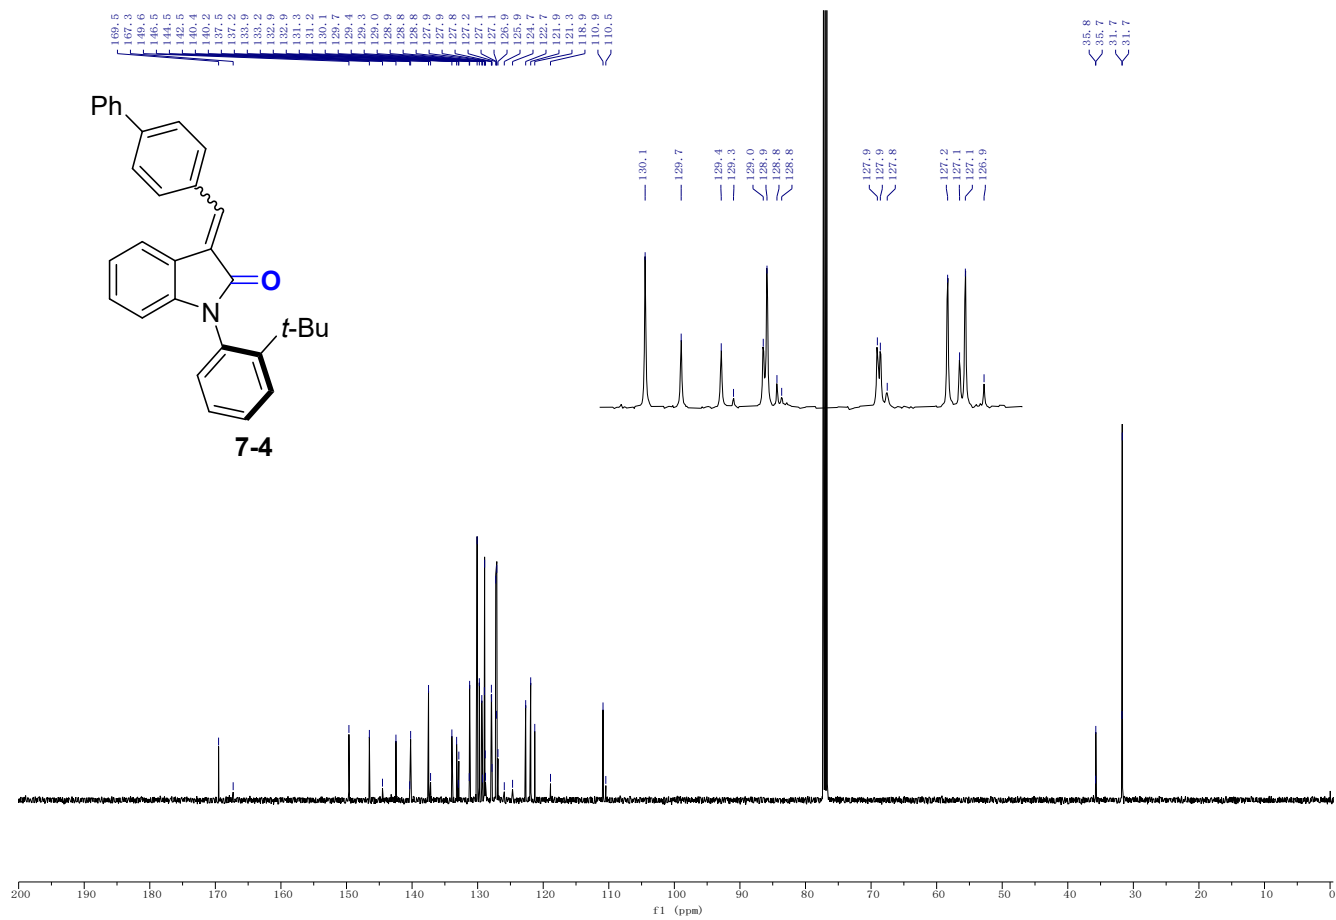

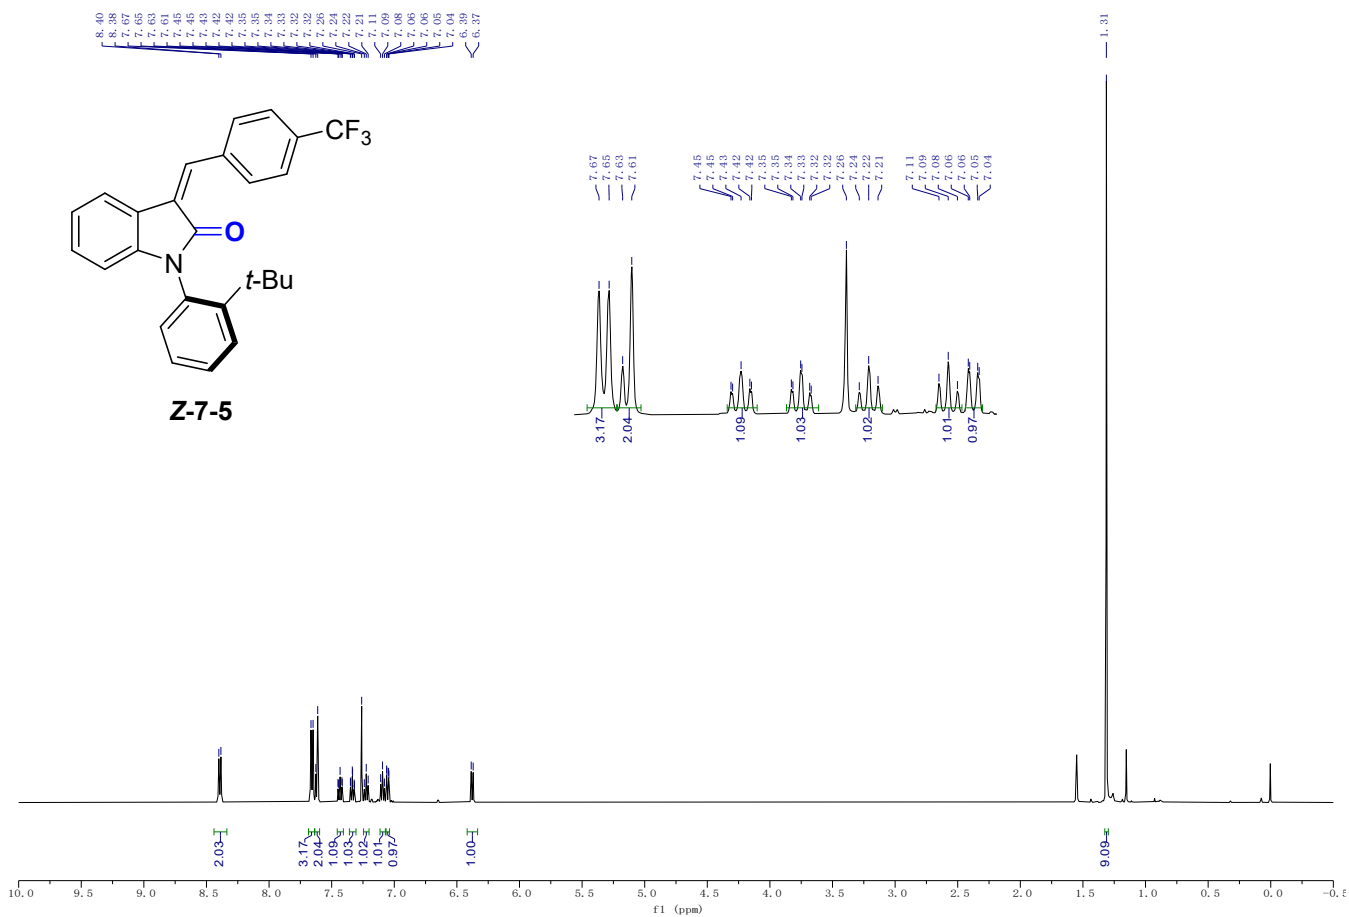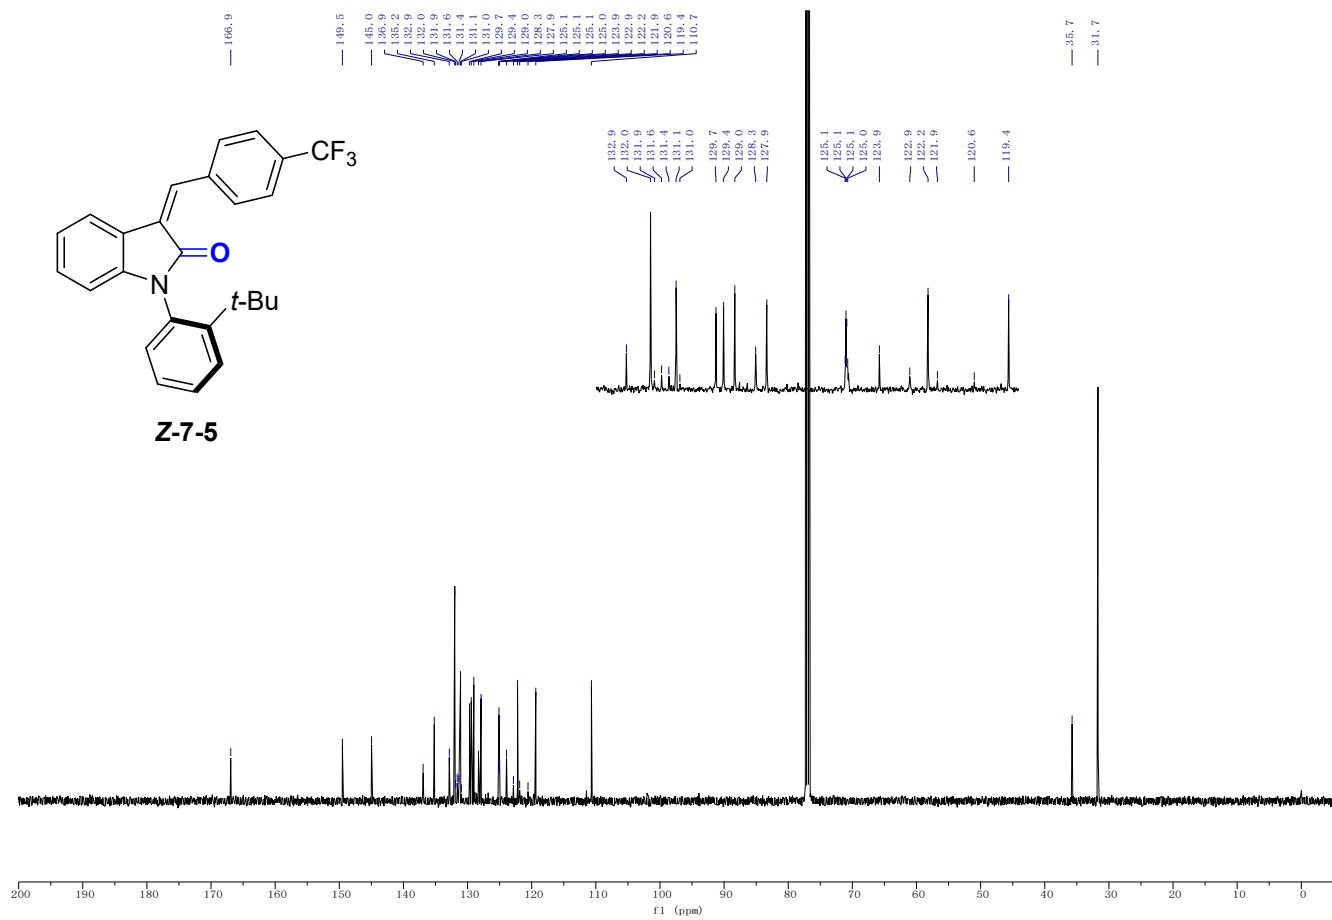

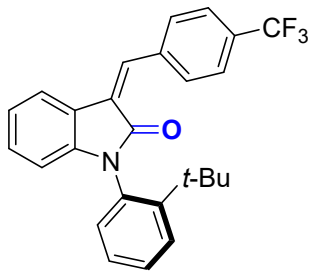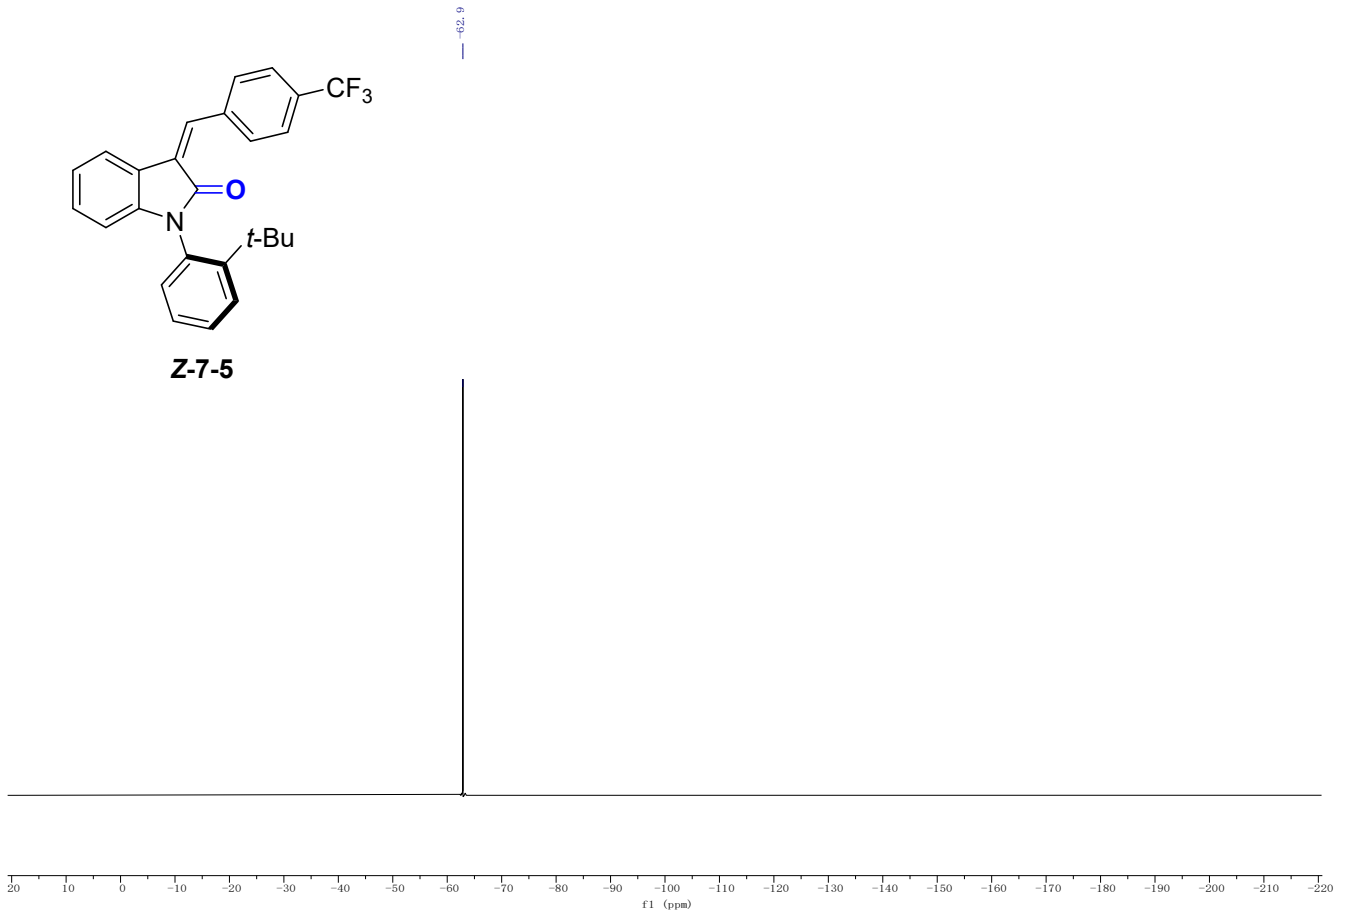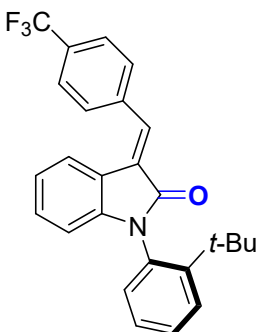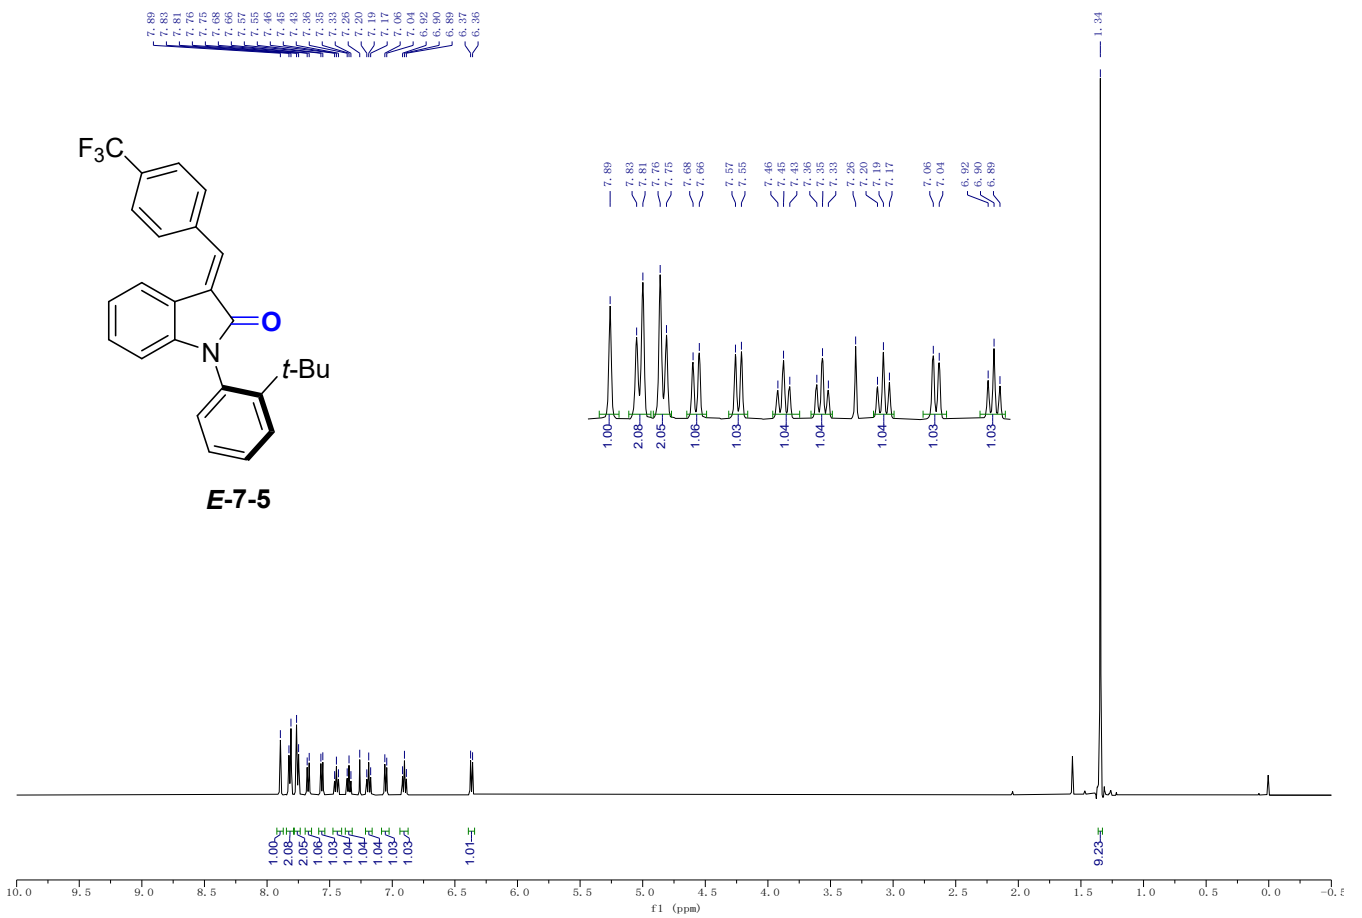

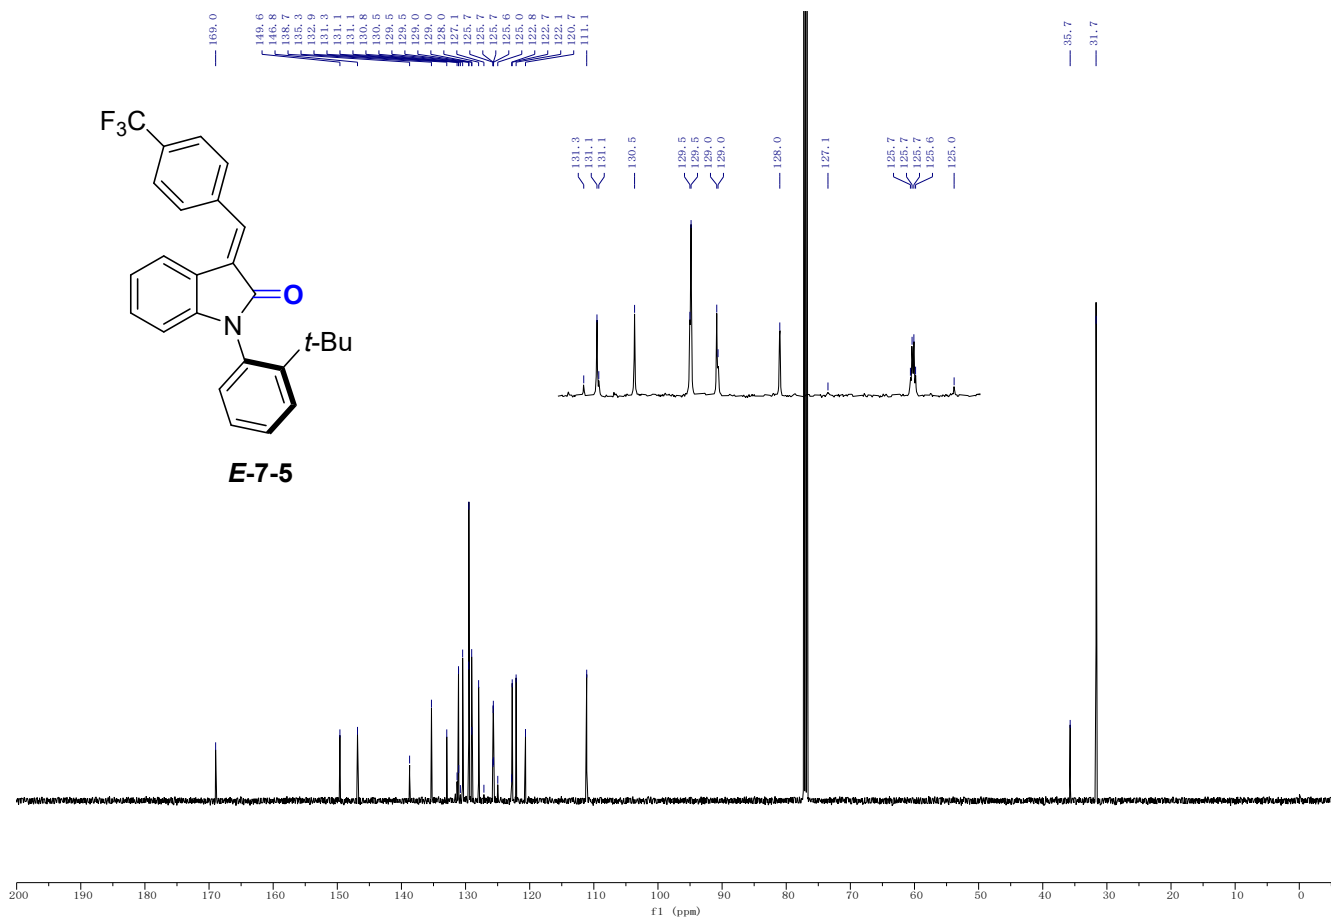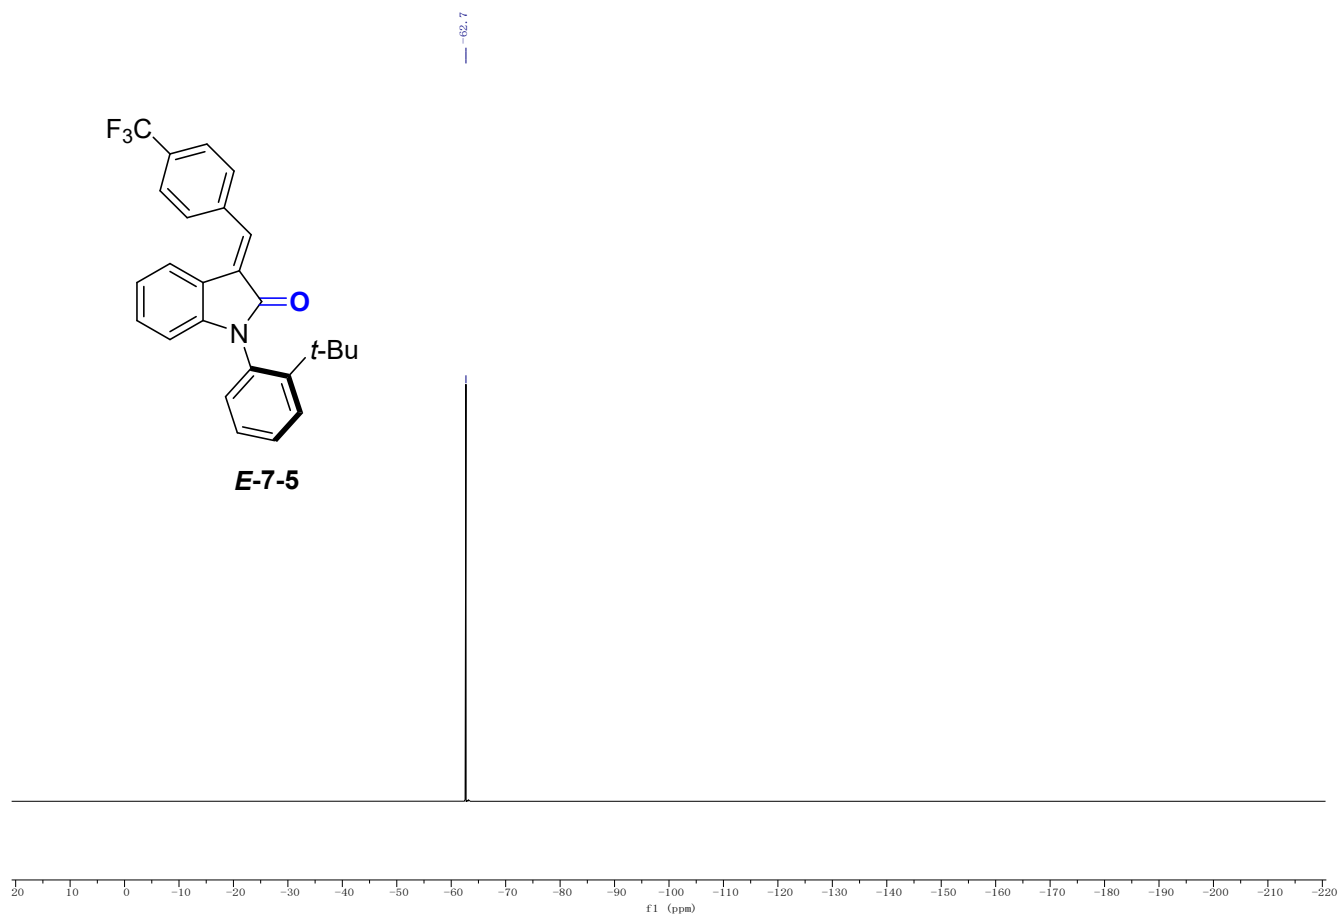

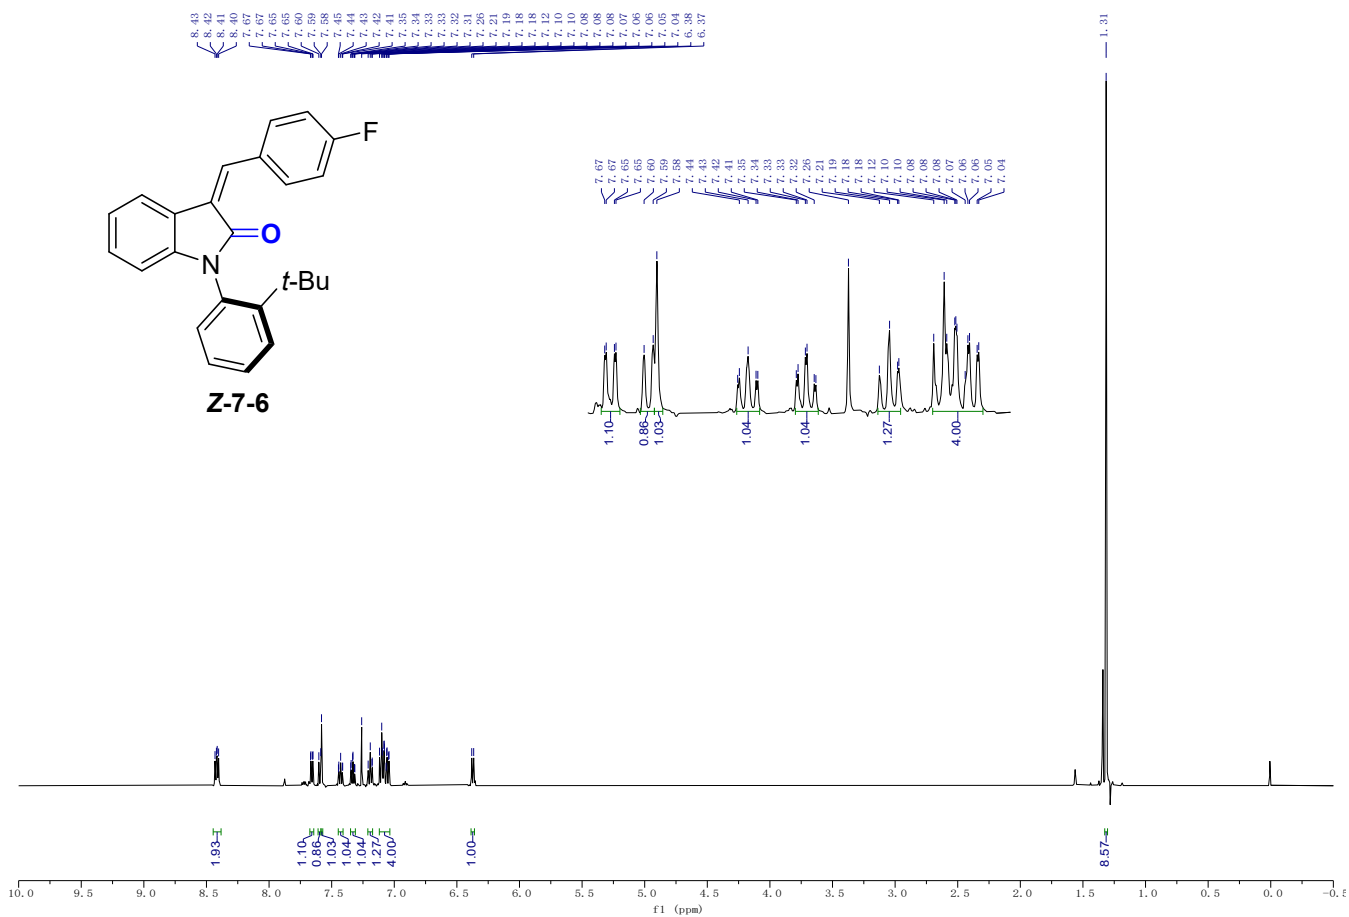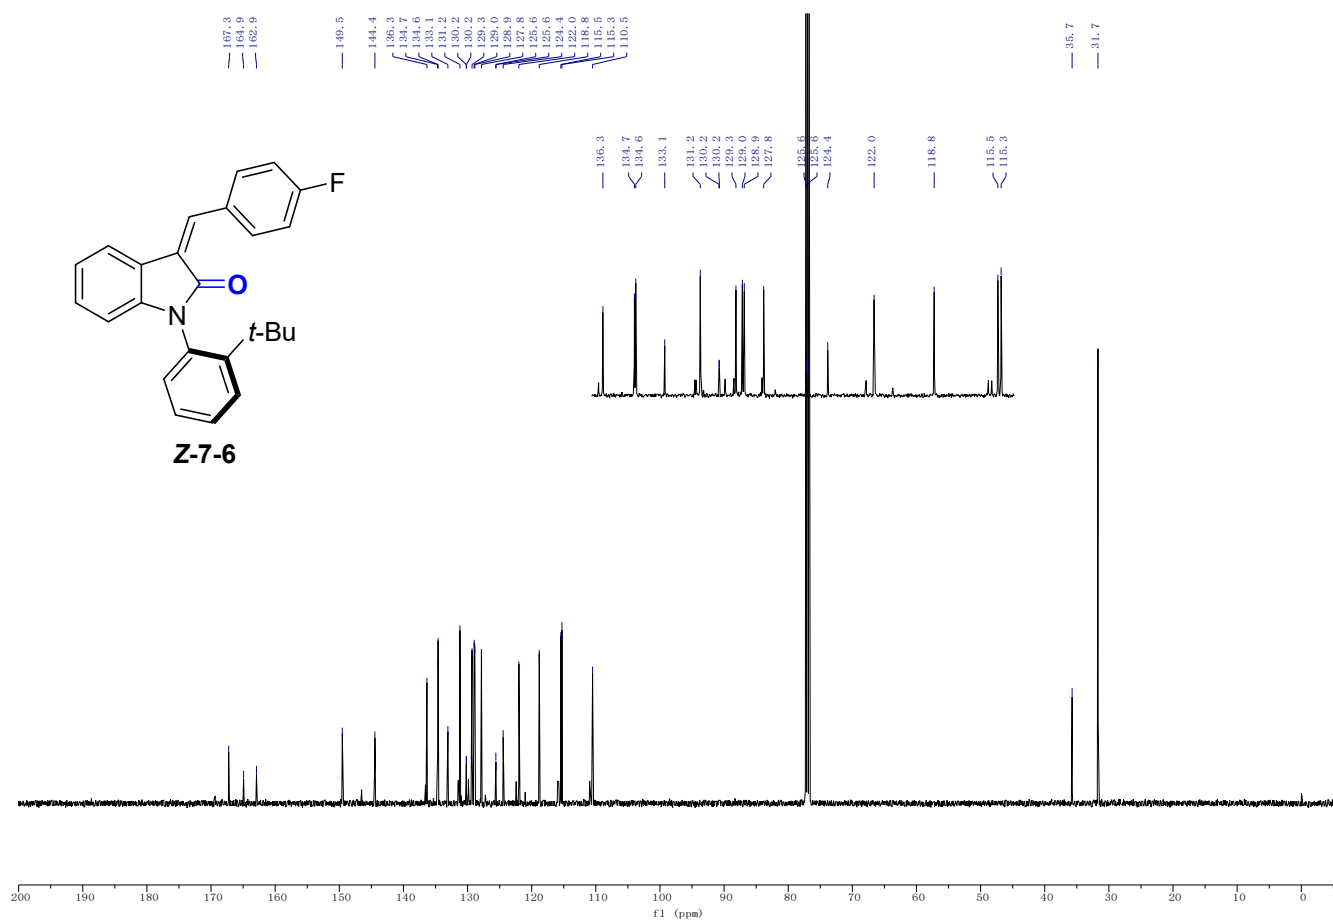



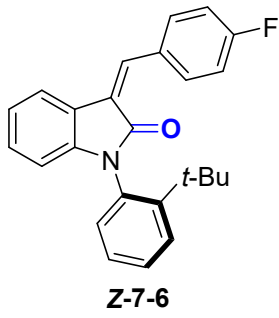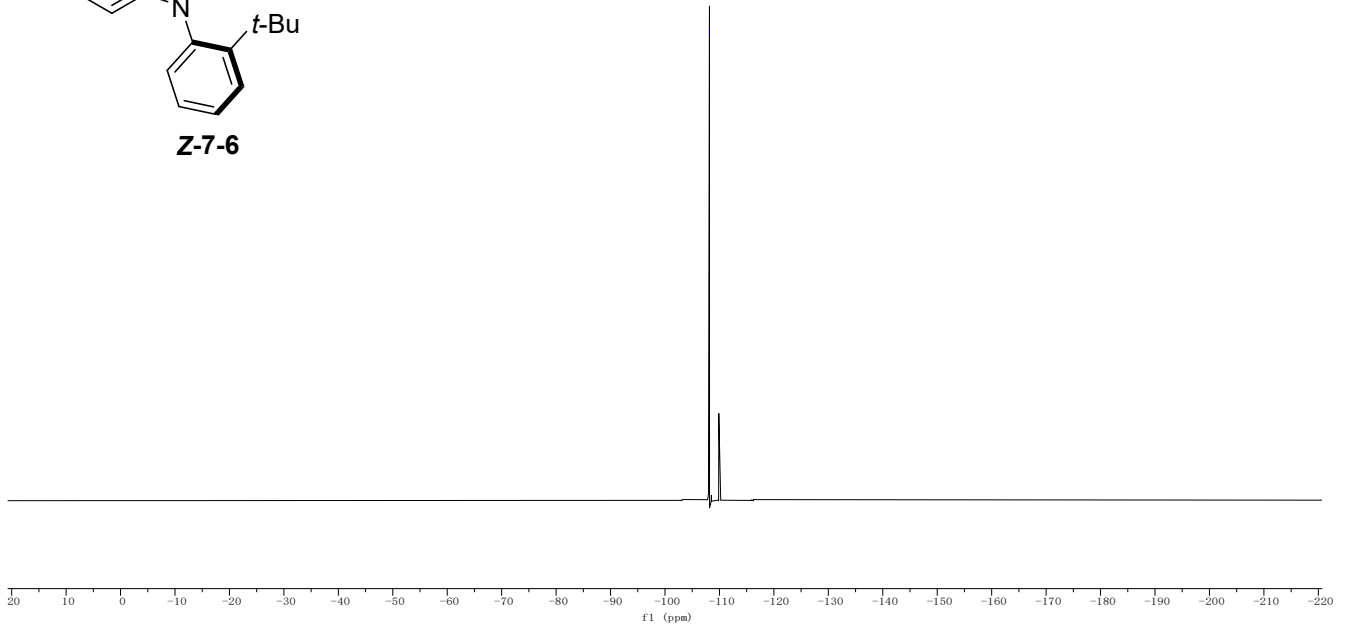

7.87  
7.75  
7.72  
7.72  
7.71  
7.68  
7.68  
7.67  
7.66  
7.66  
7.46  
7.45  
7.44  
7.44  
7.43  
7.42  
7.36  
7.34  
7.34  
7.33  
7.26  
7.23  
7.23  
7.17  
7.17  
7.16  
7.06  
7.05  
7.04  
7.04  
6.93  
6.91  
6.89  
6.85  
6.85

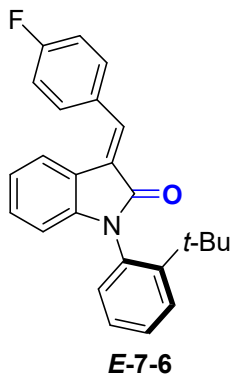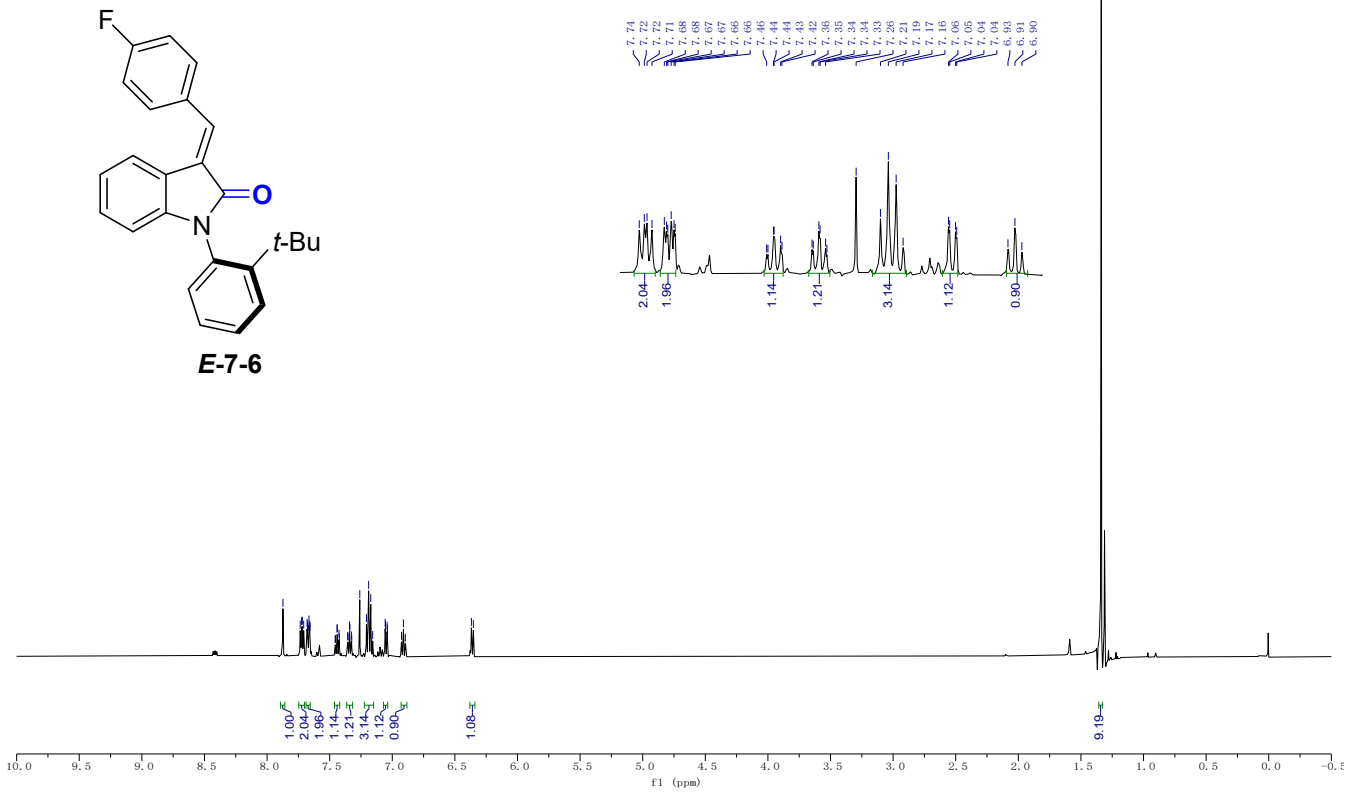

7.74  
7.72  
7.71  
7.68  
7.67  
7.66  
7.66  
7.46  
7.44  
7.43  
7.42  
7.36  
7.35  
7.34  
7.34  
7.33  
7.26  
7.21  
7.19  
7.16  
7.06  
7.05  
7.04  
7.04  
6.91  
6.90

2.04  
1.96  
1.14  
1.21  
3.14  
1.12  
0.90

1.00  
2.04  
1.96  
1.14  
1.21  
3.14  
1.12  
0.90

9.19

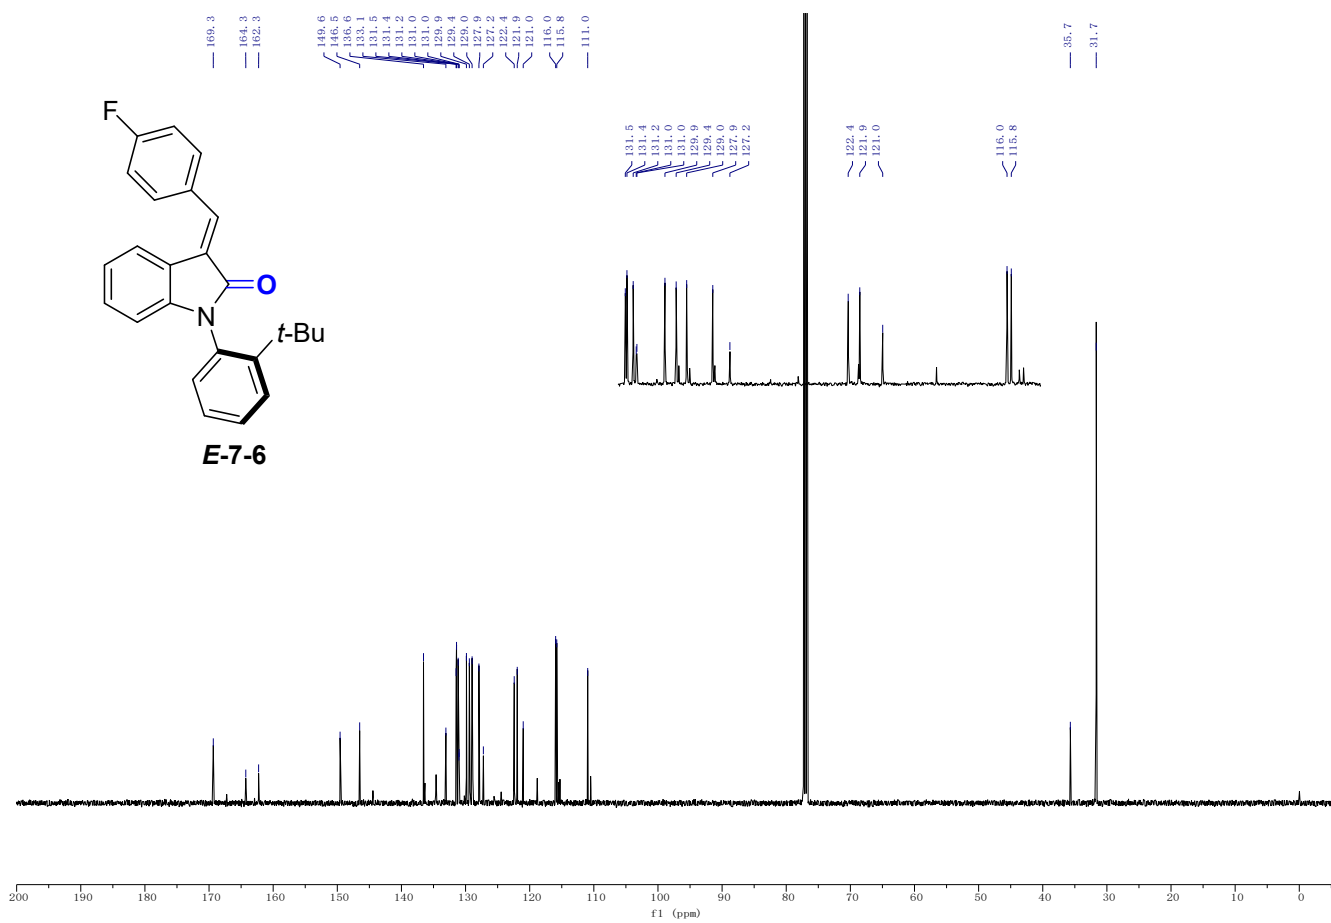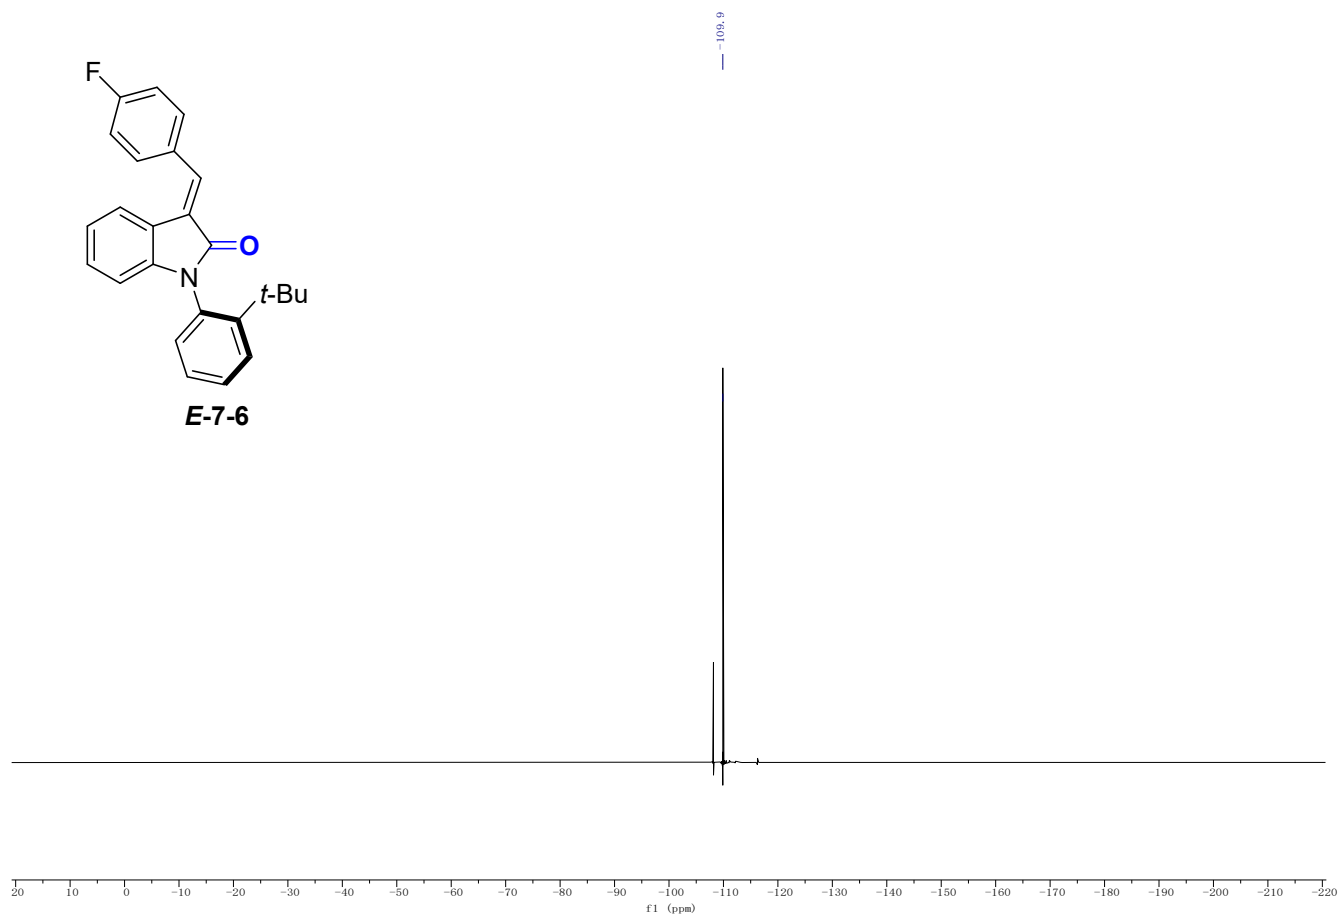

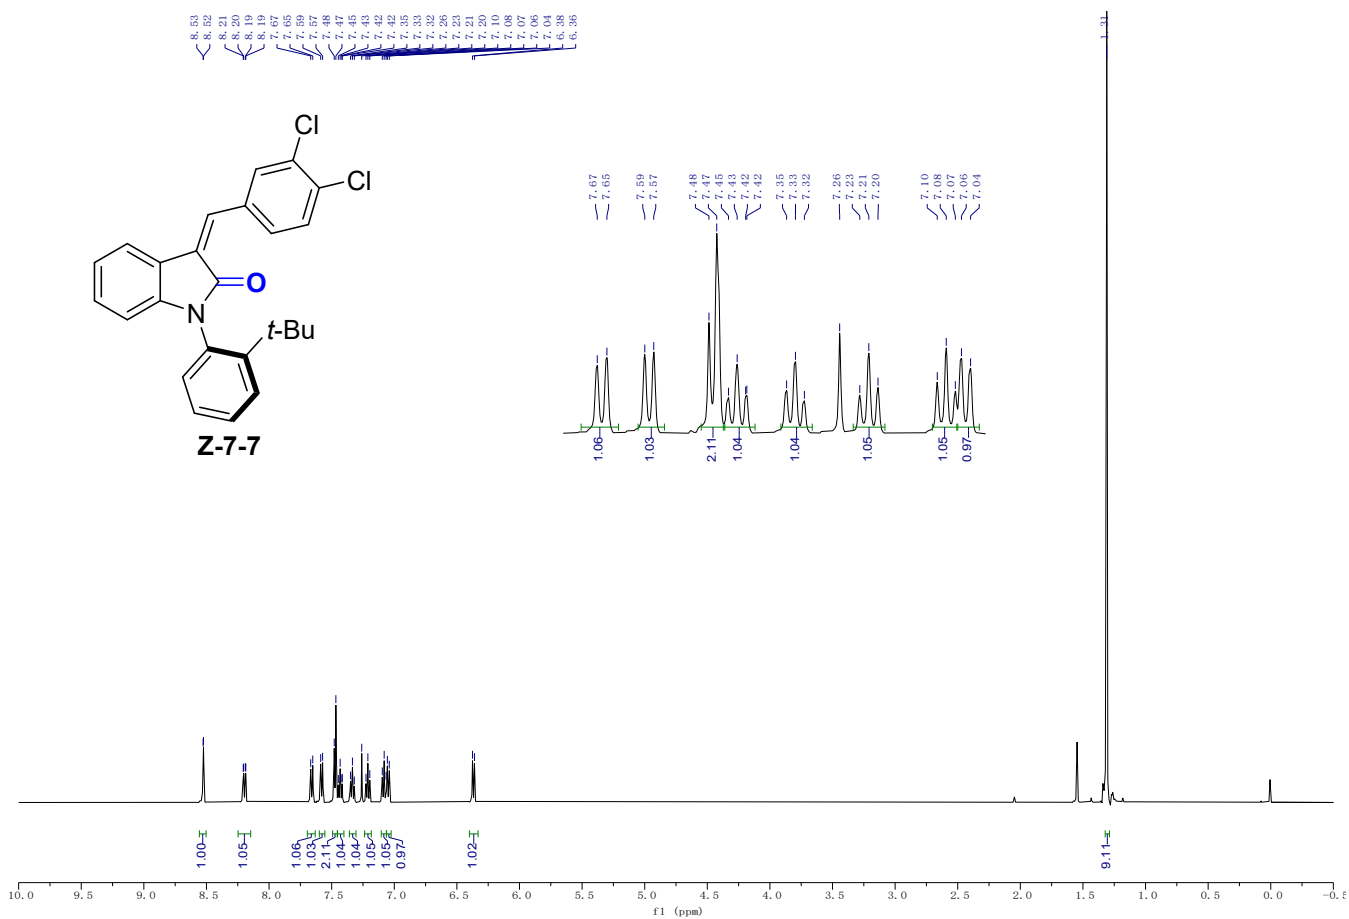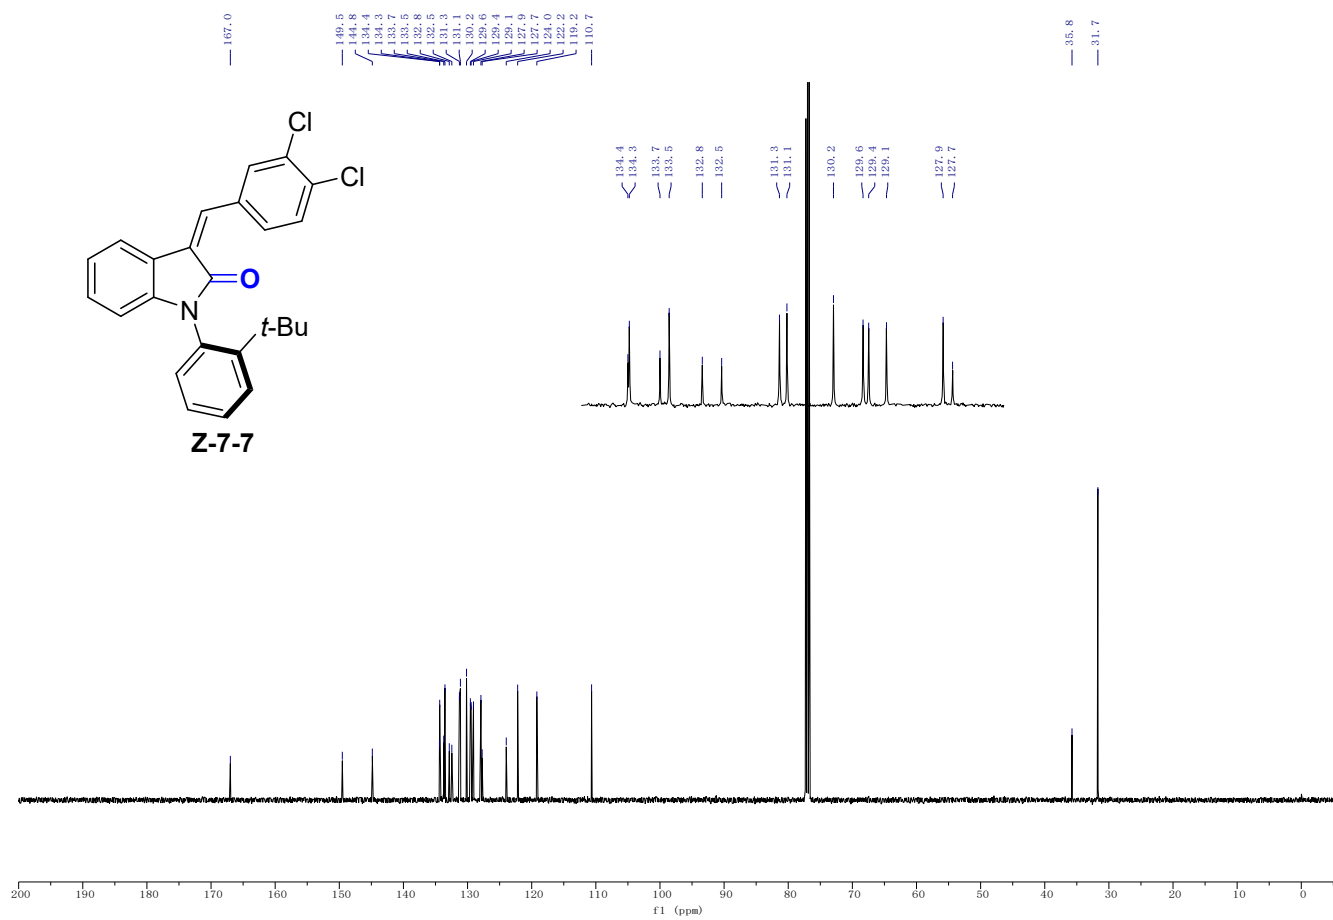

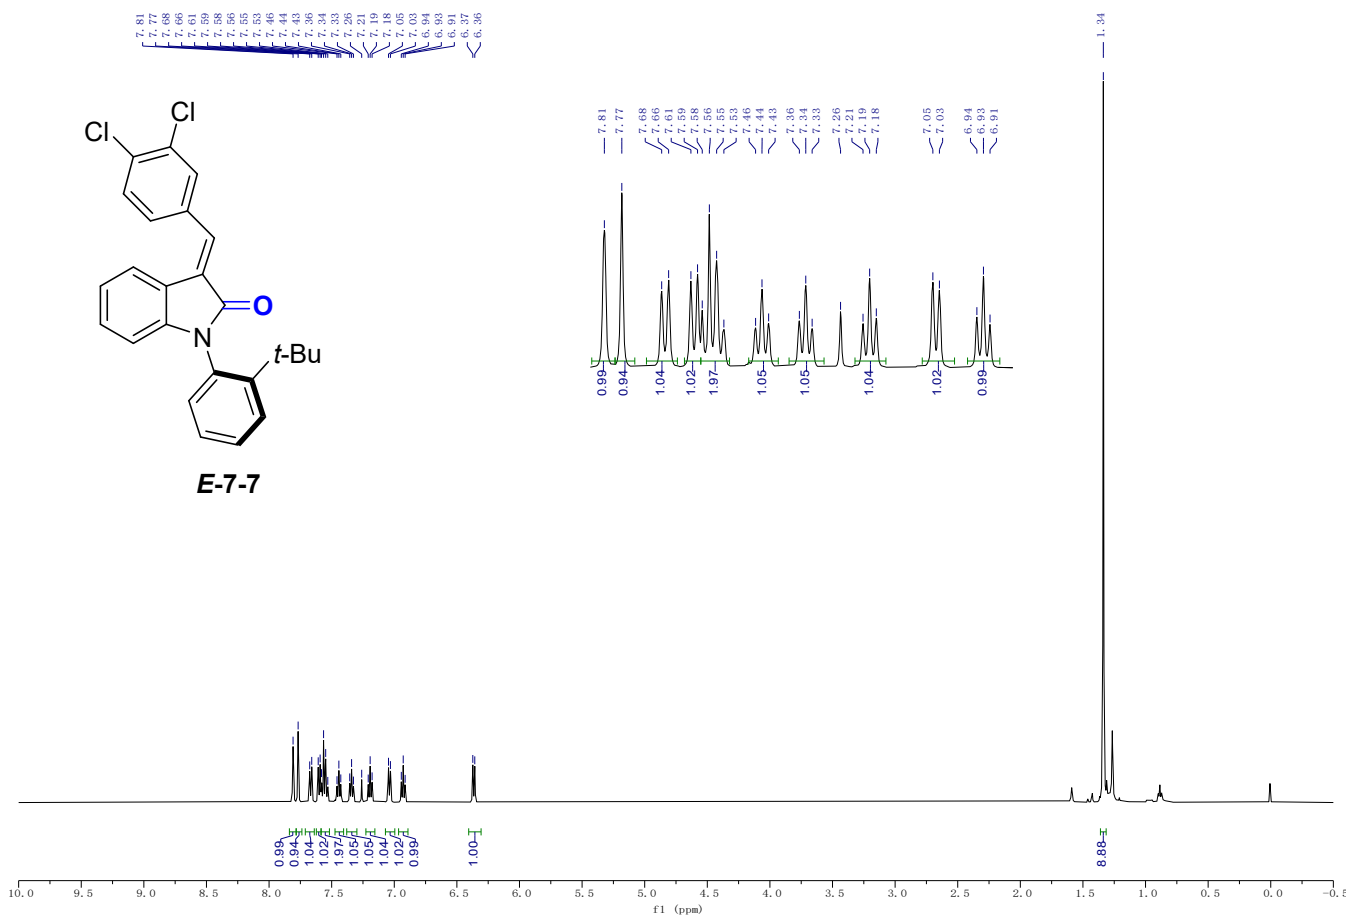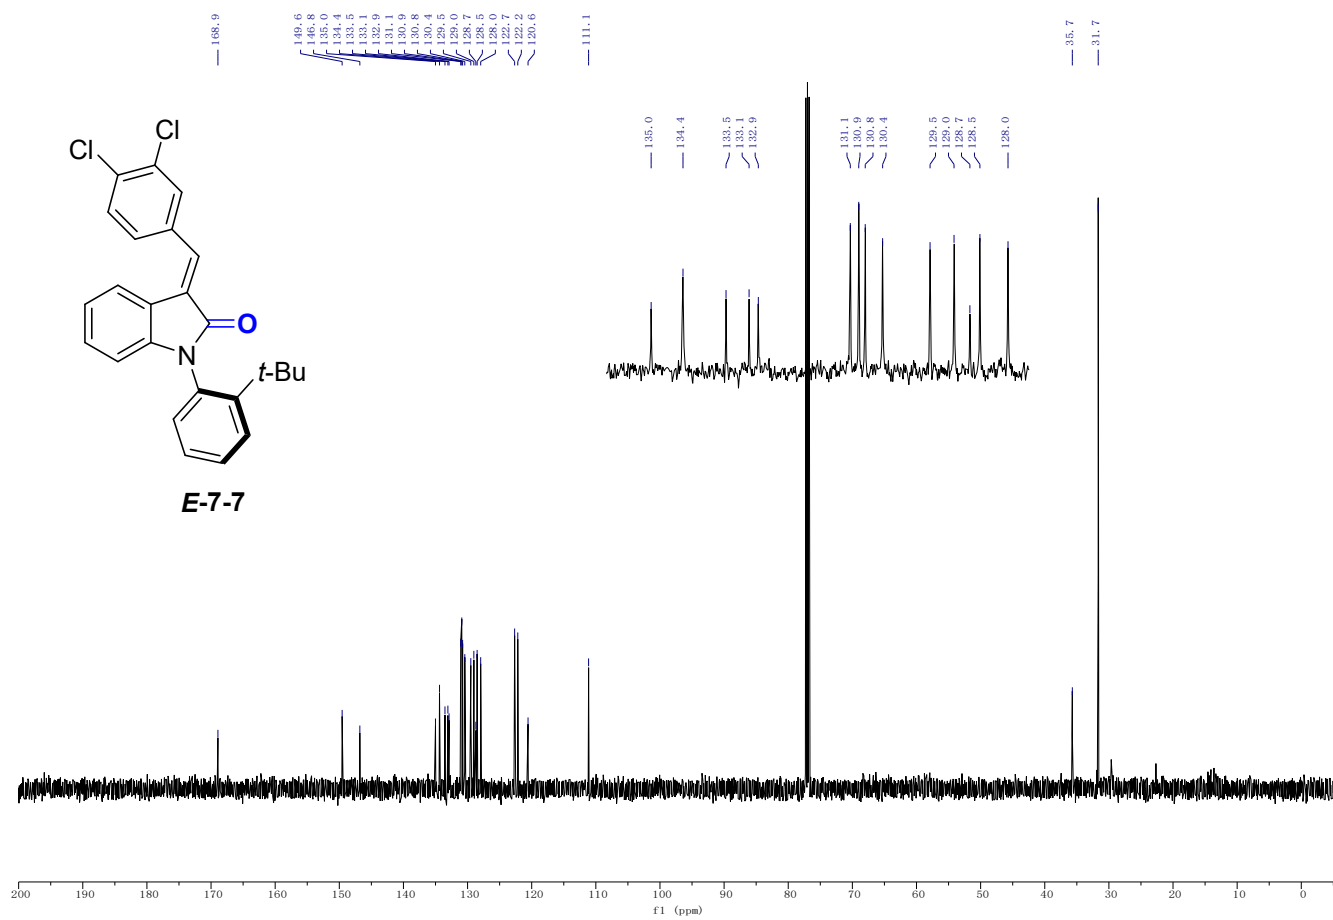

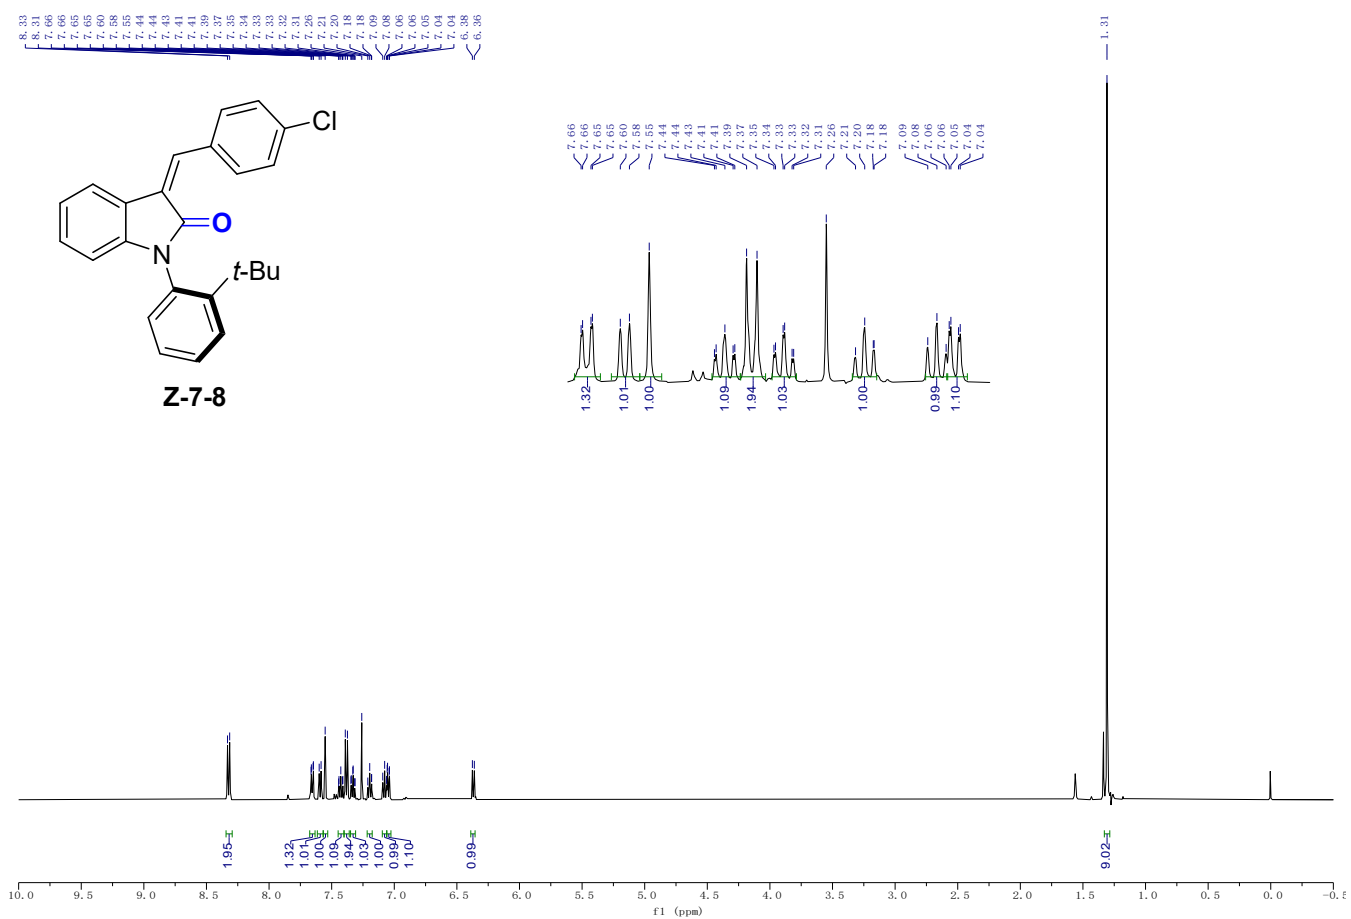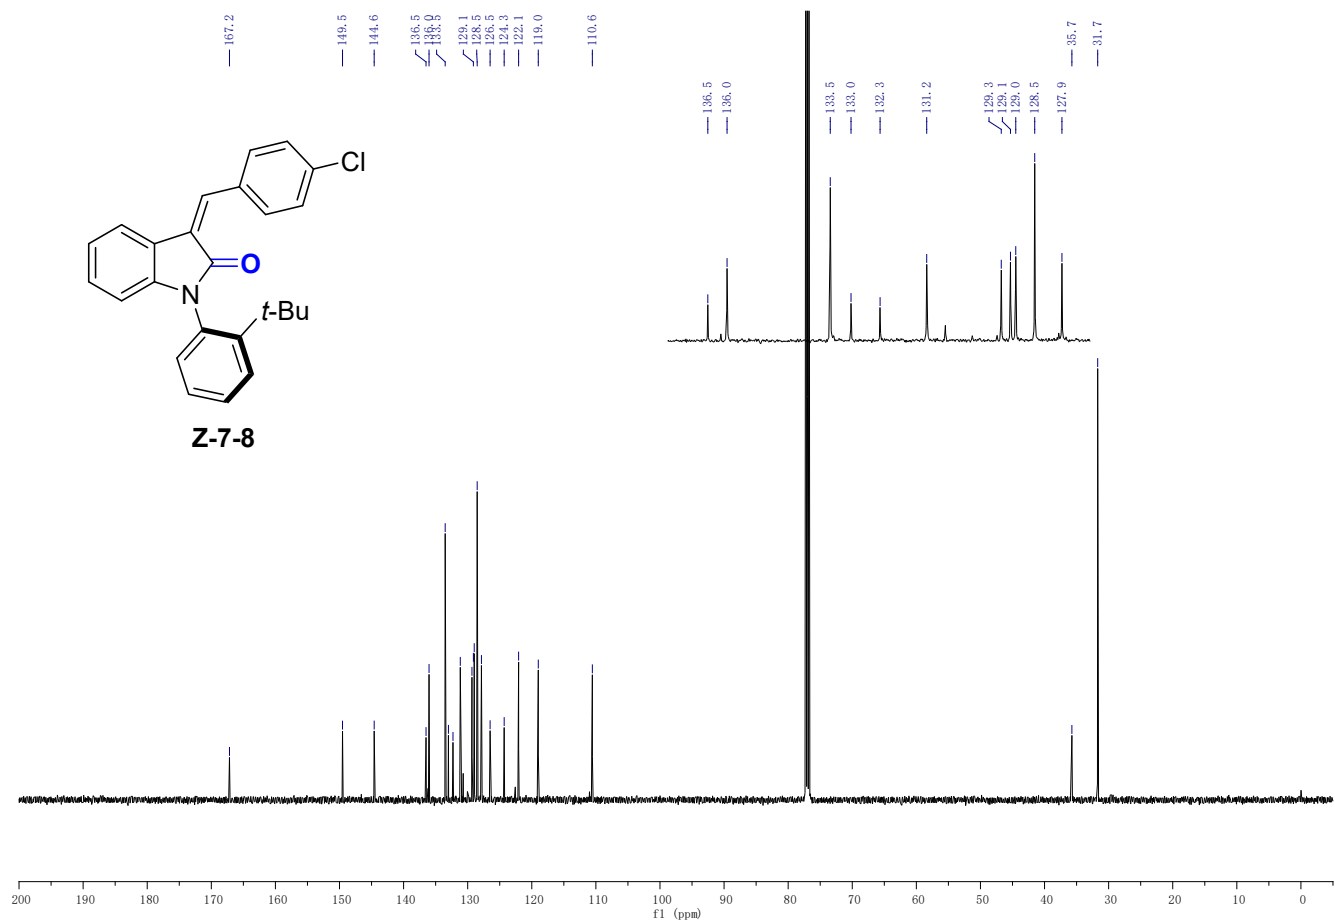

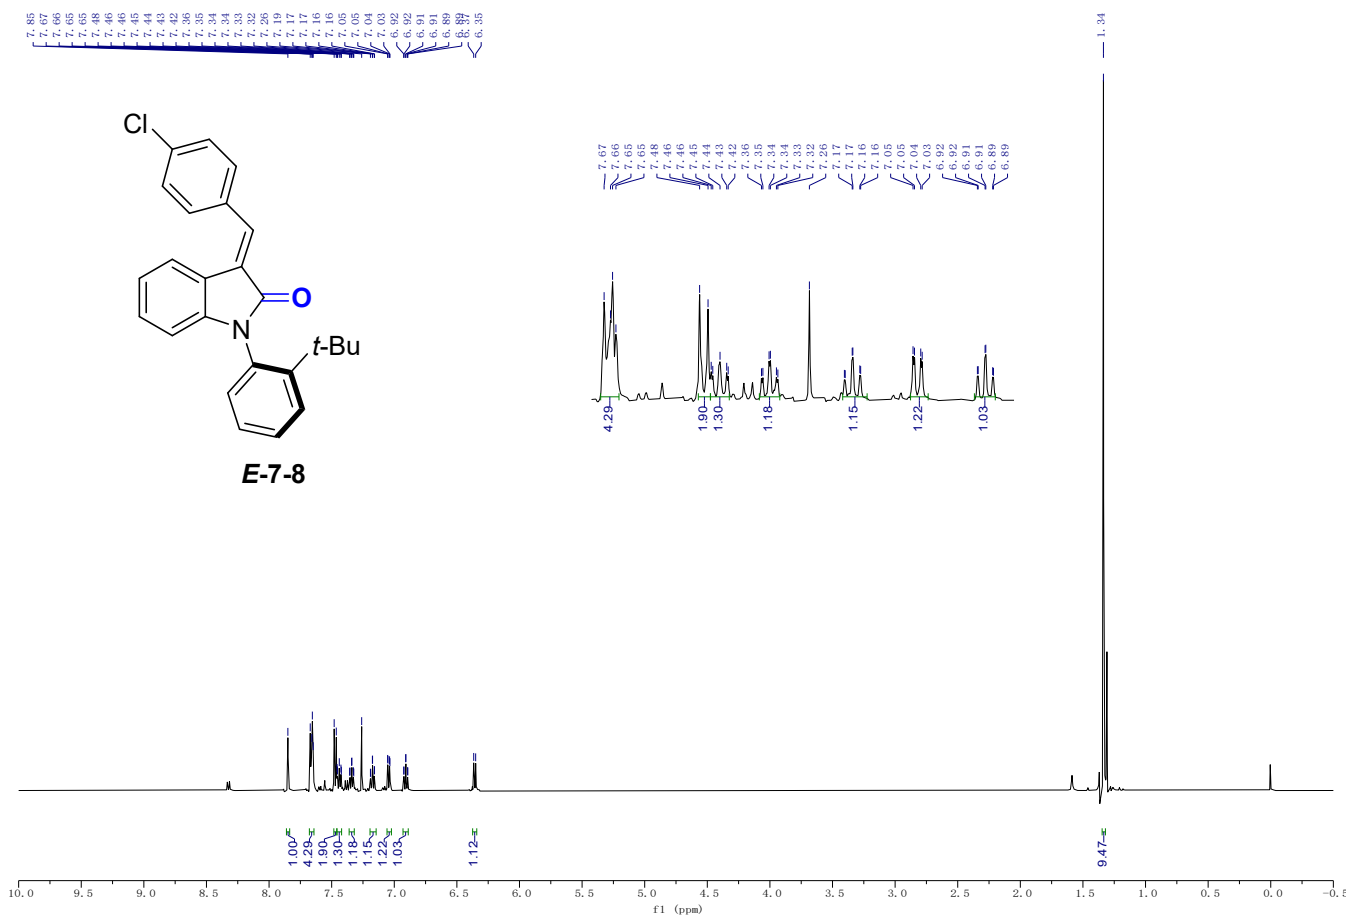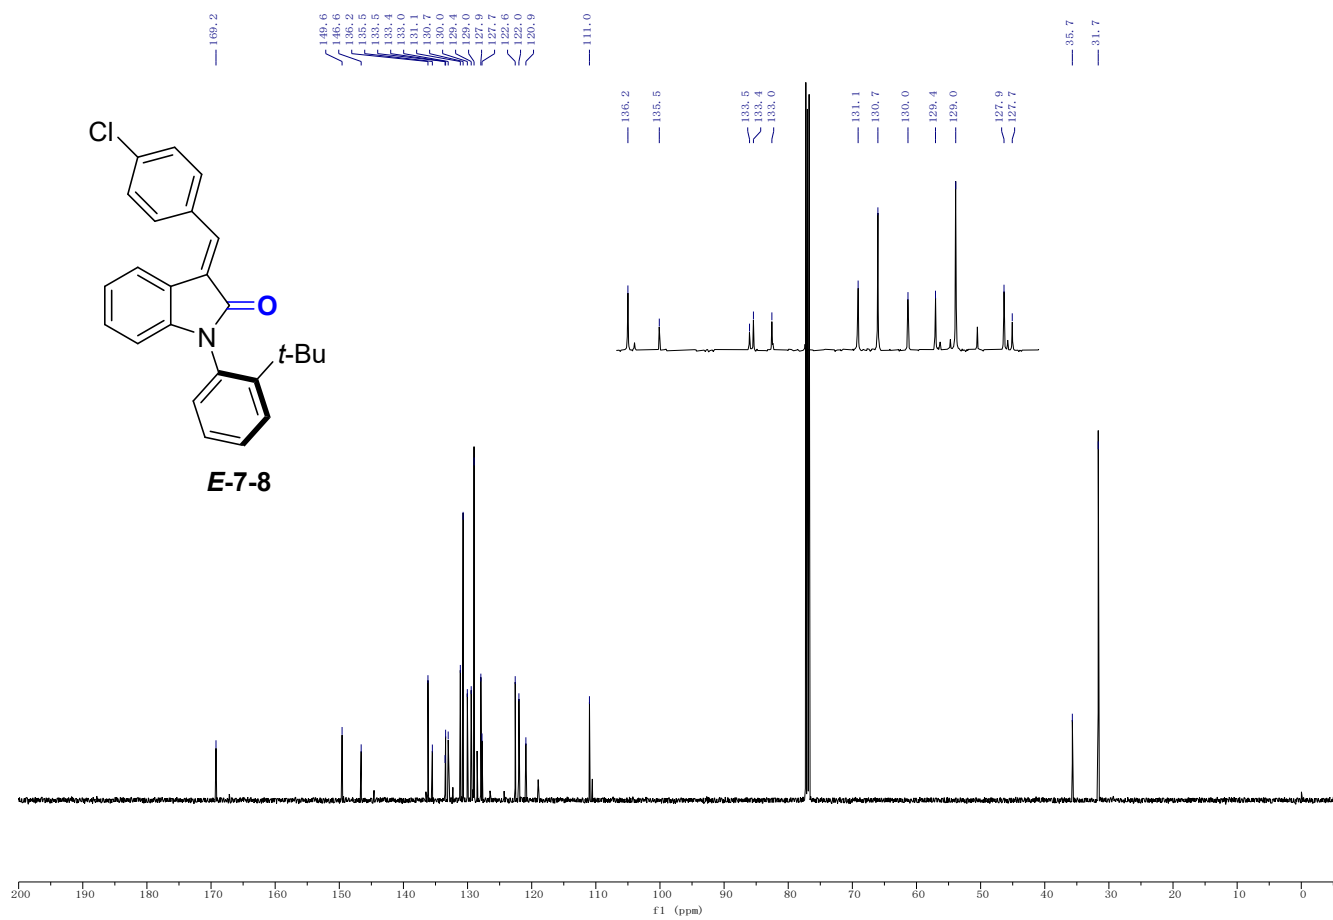

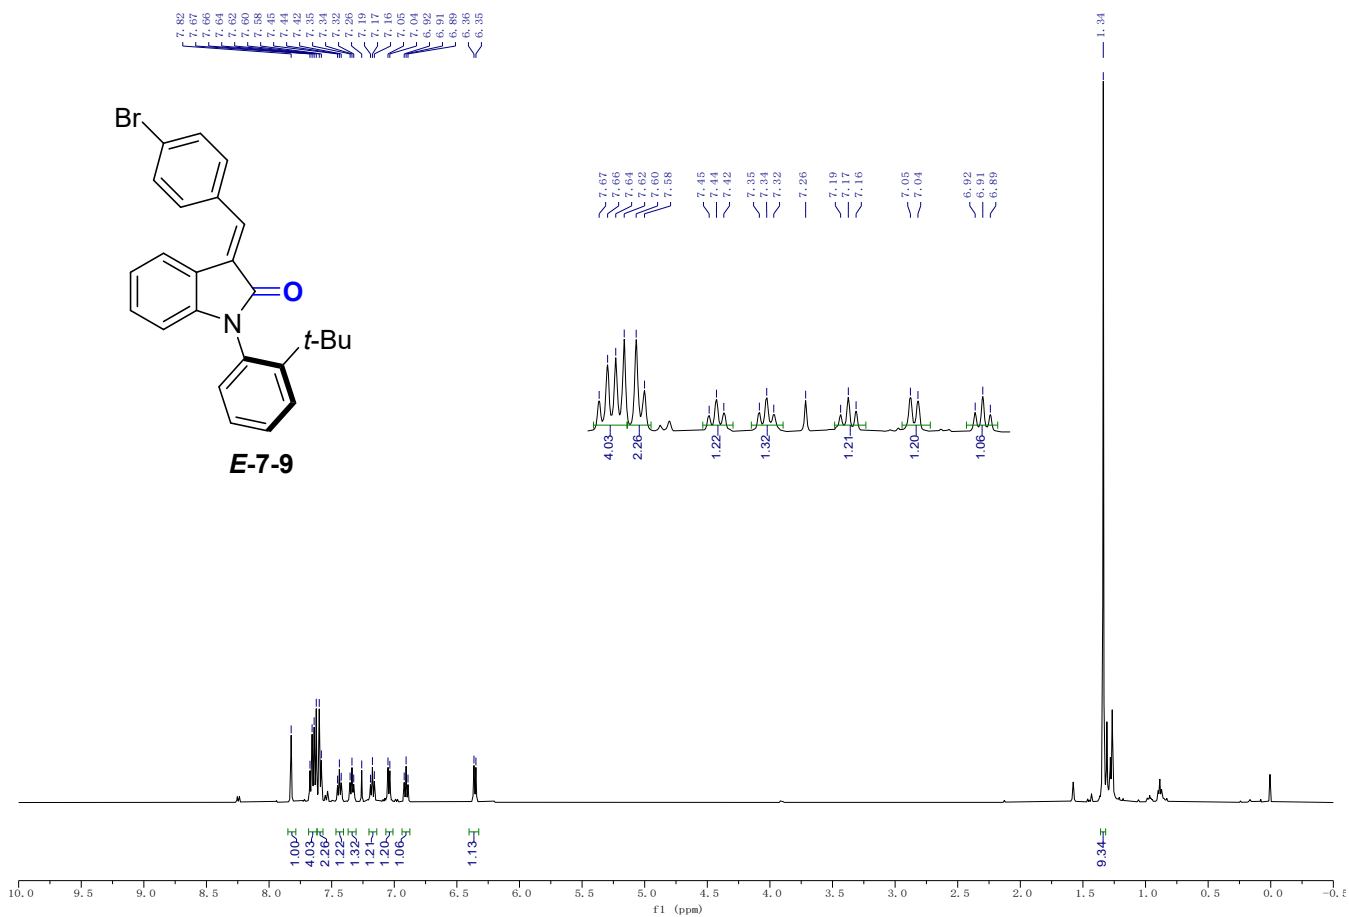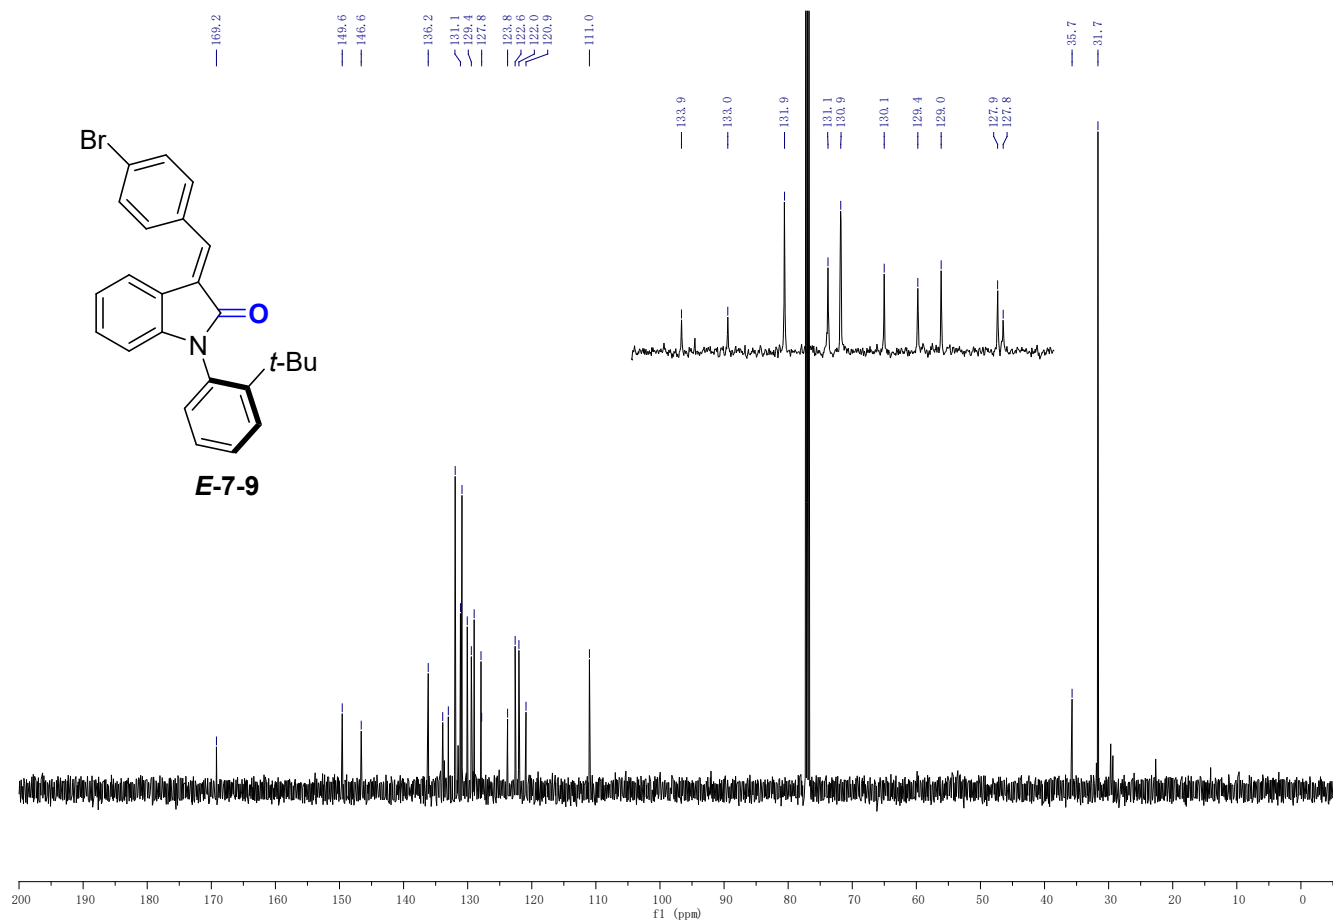

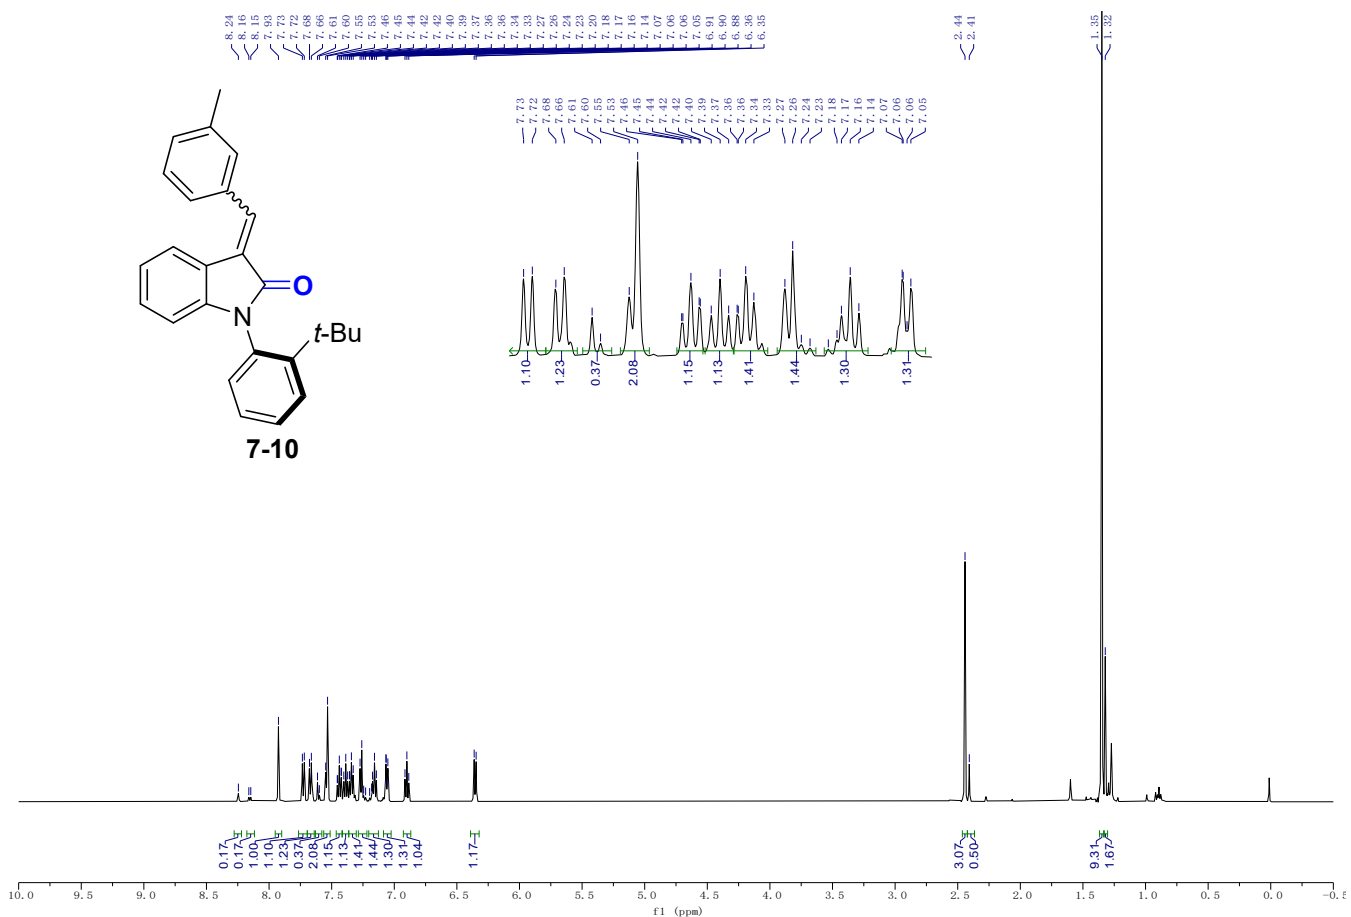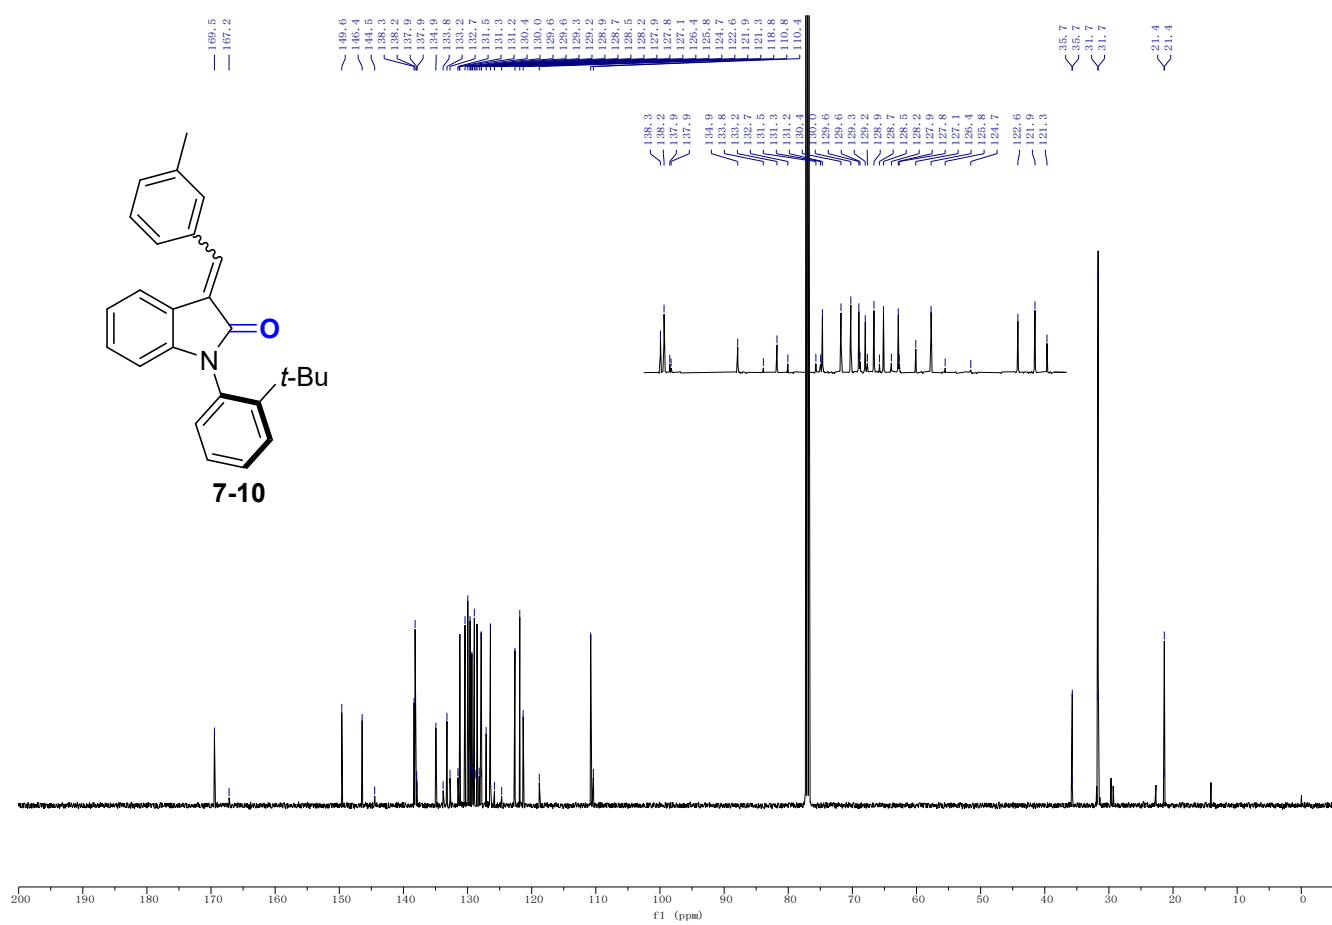



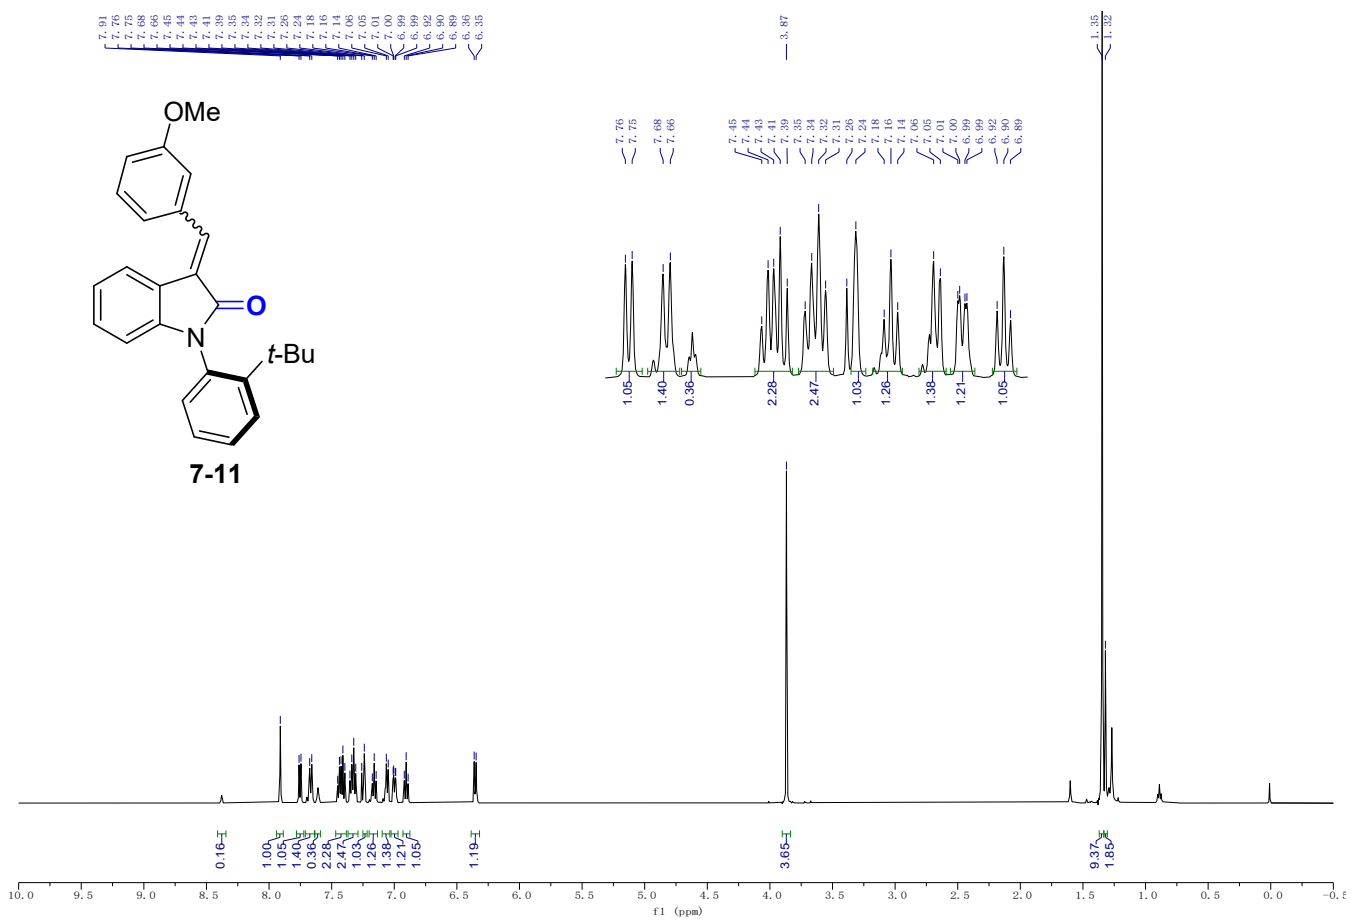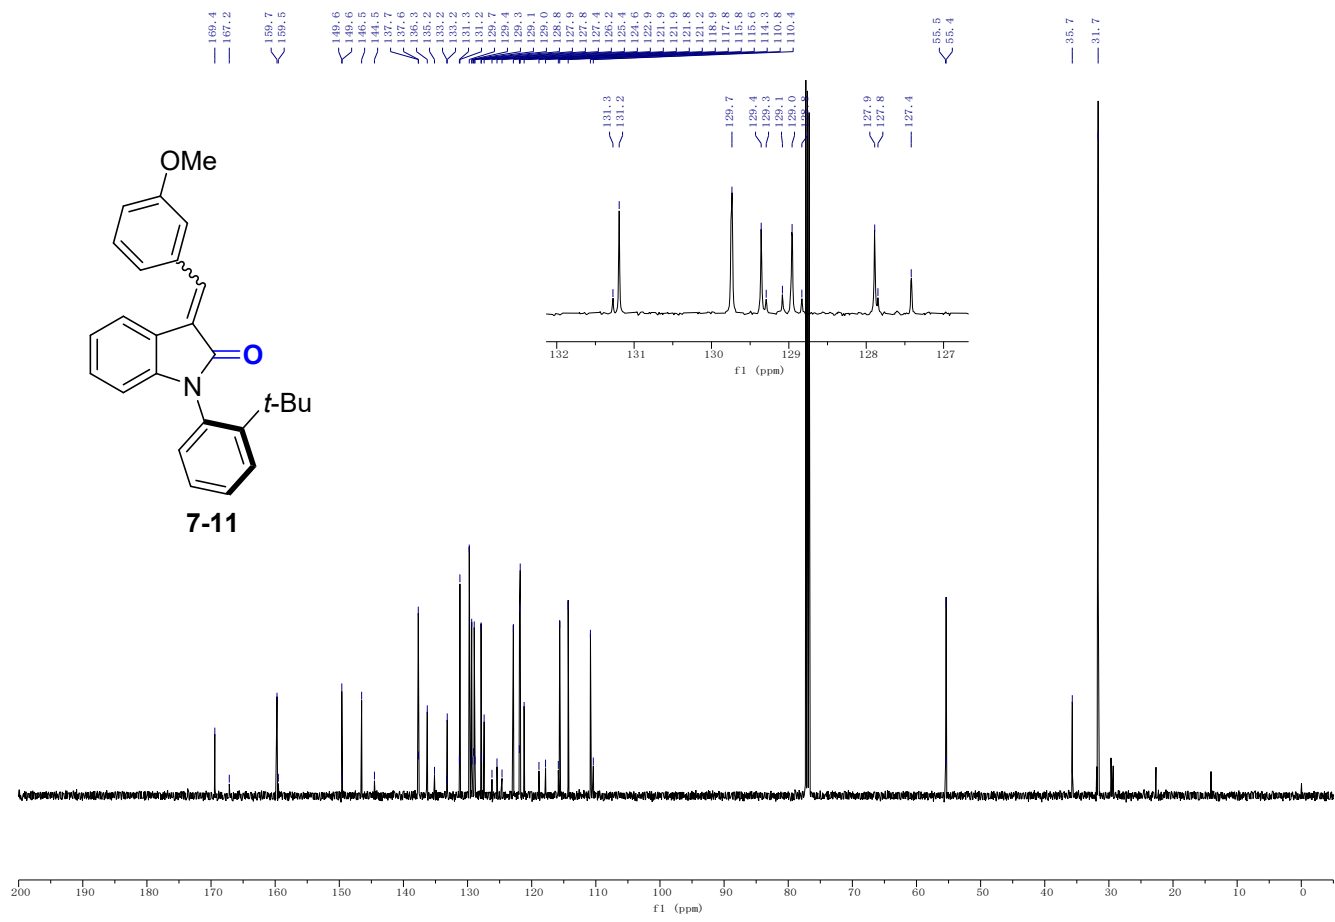

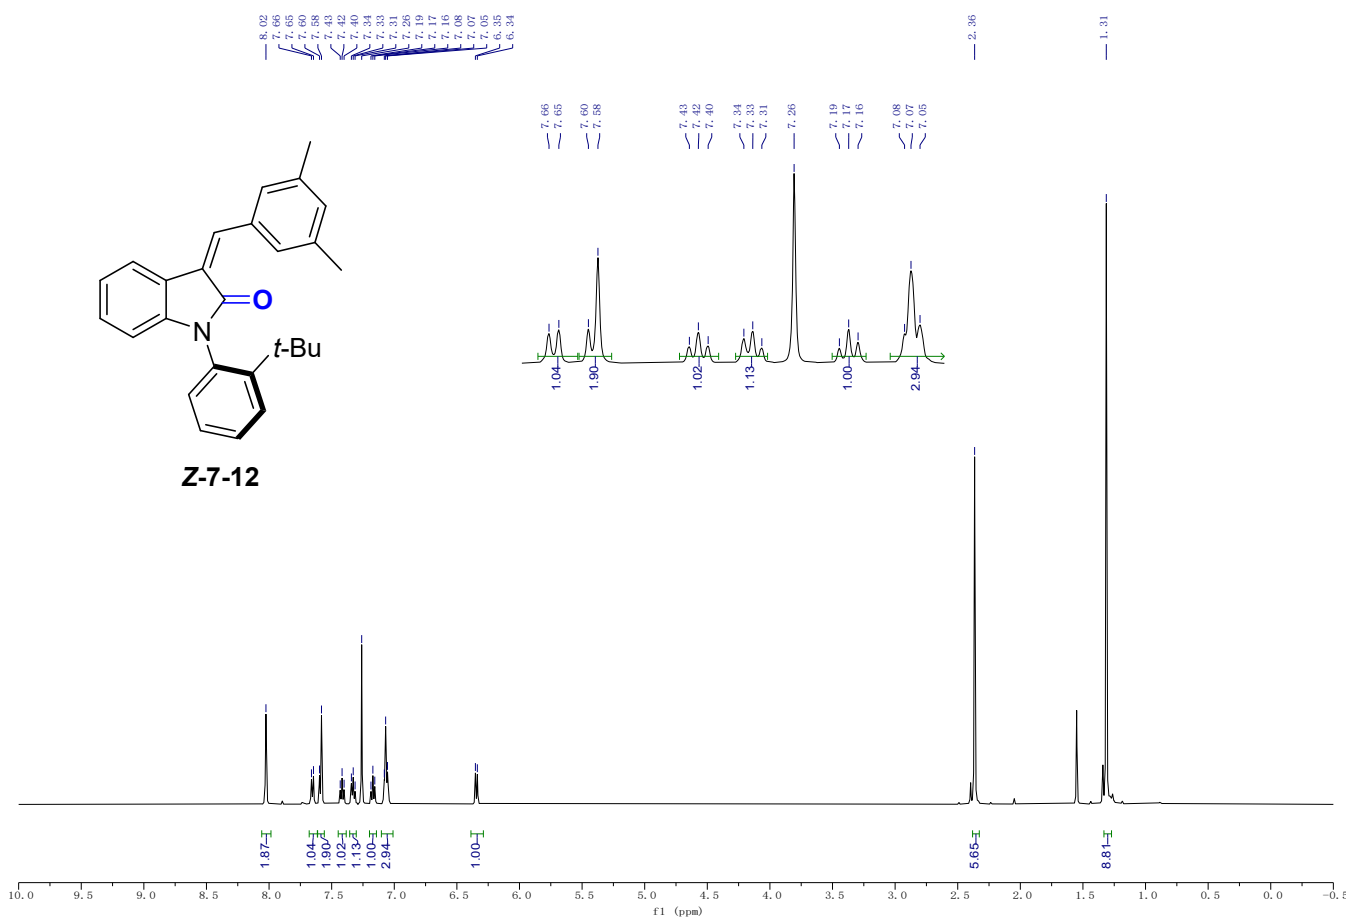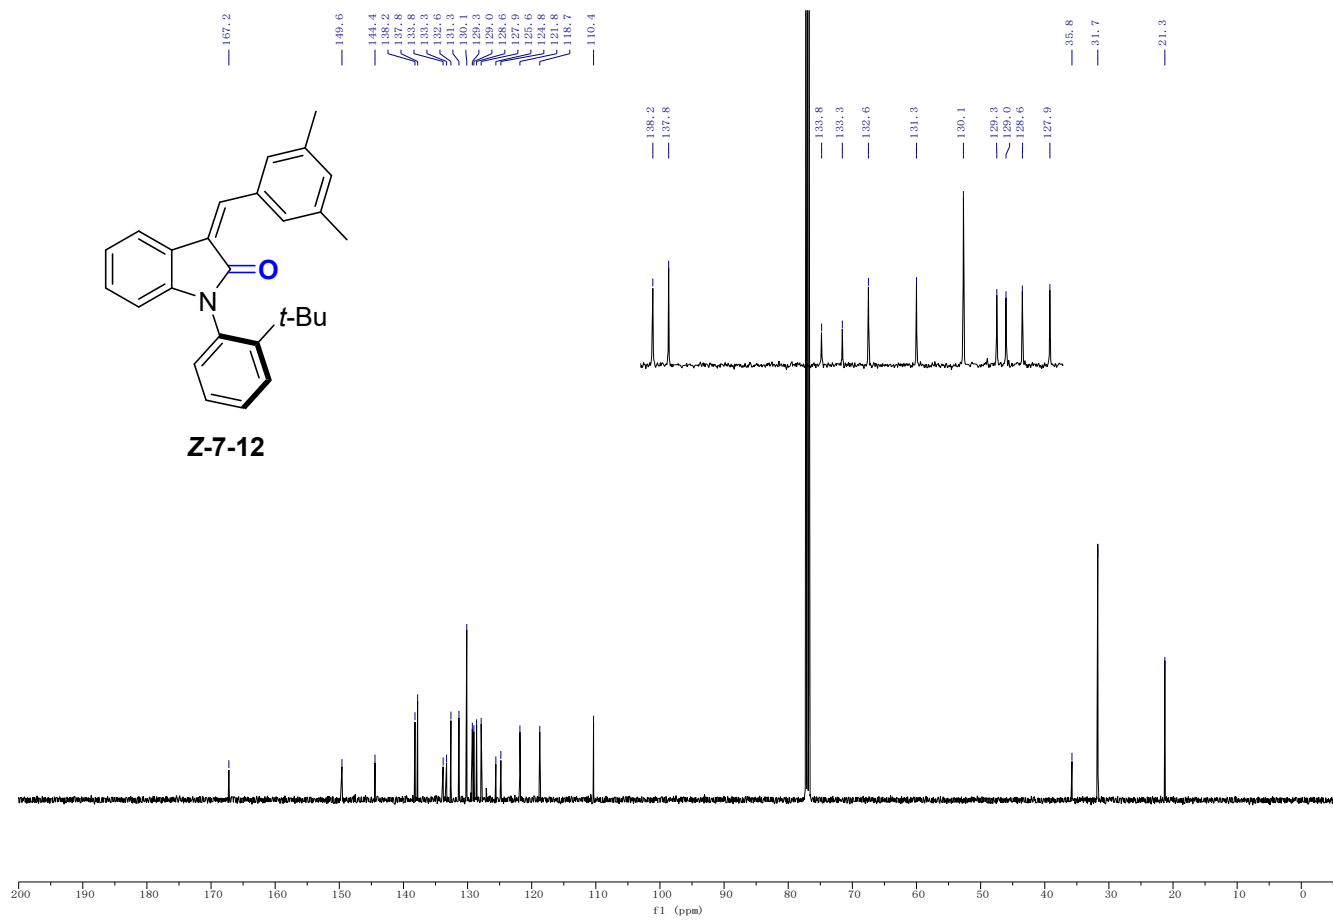

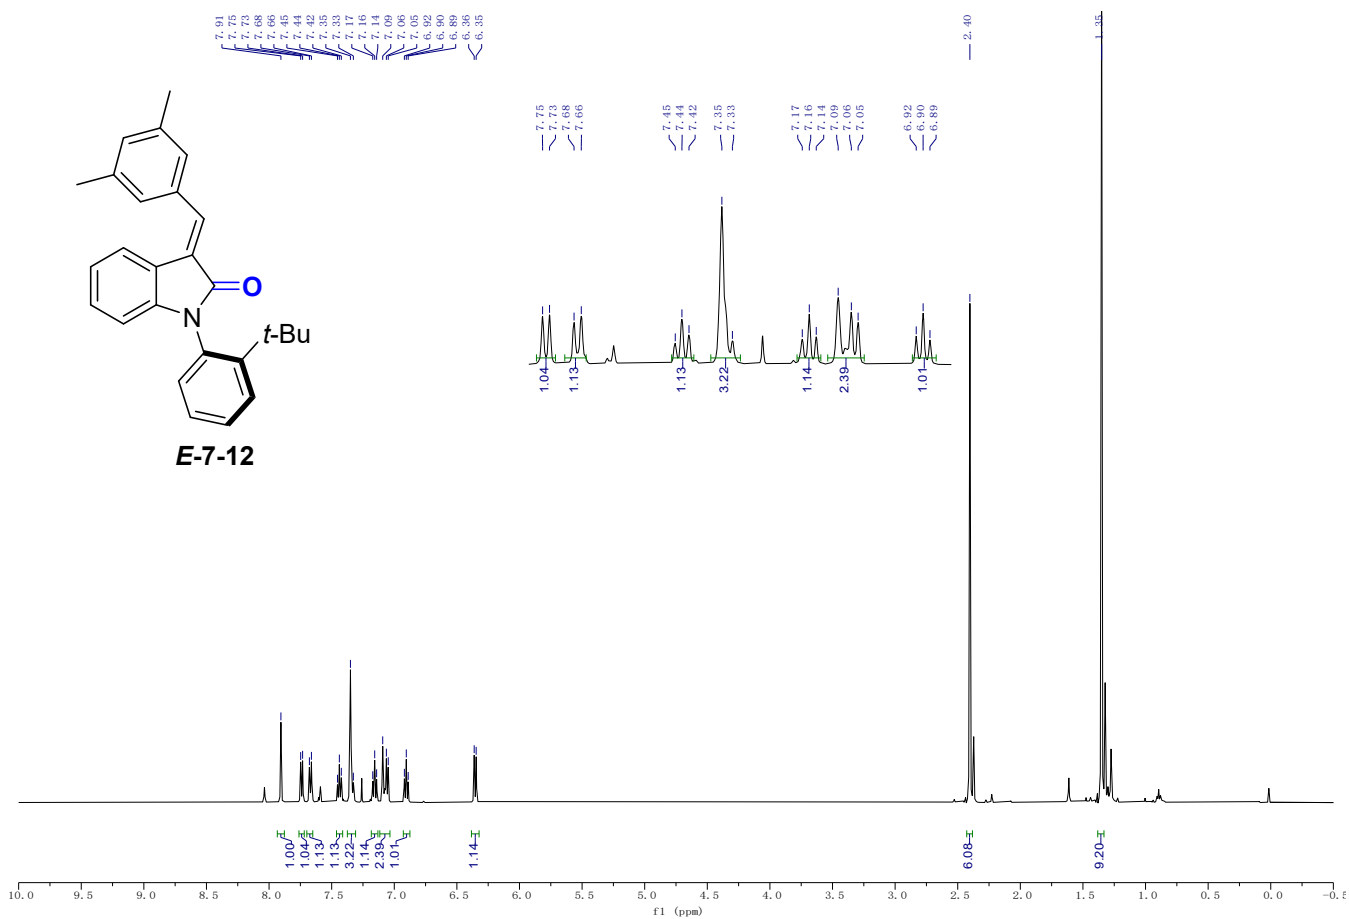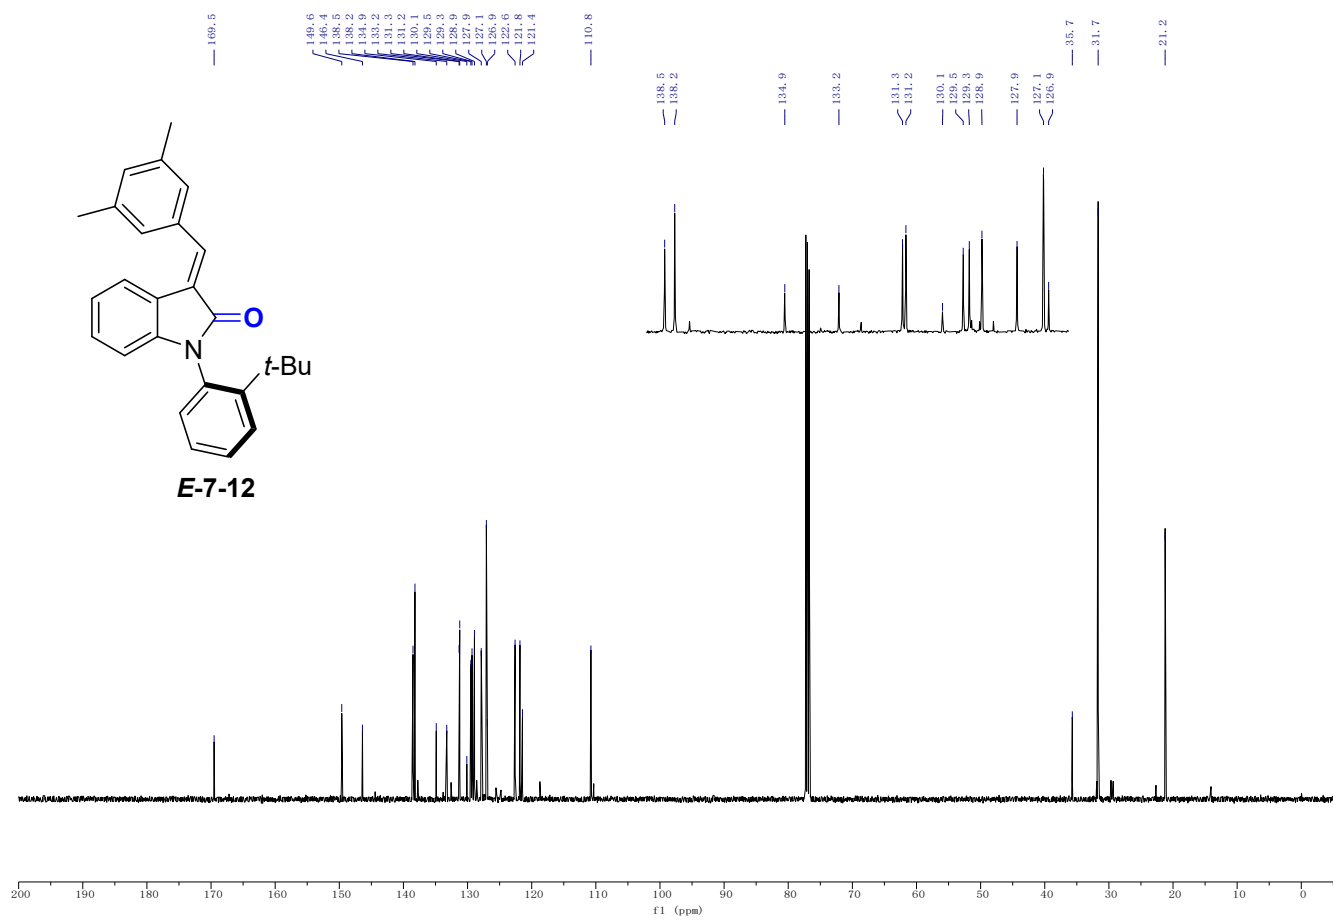

Apr07-2022. 58.1.1r  
LY21747B2-H

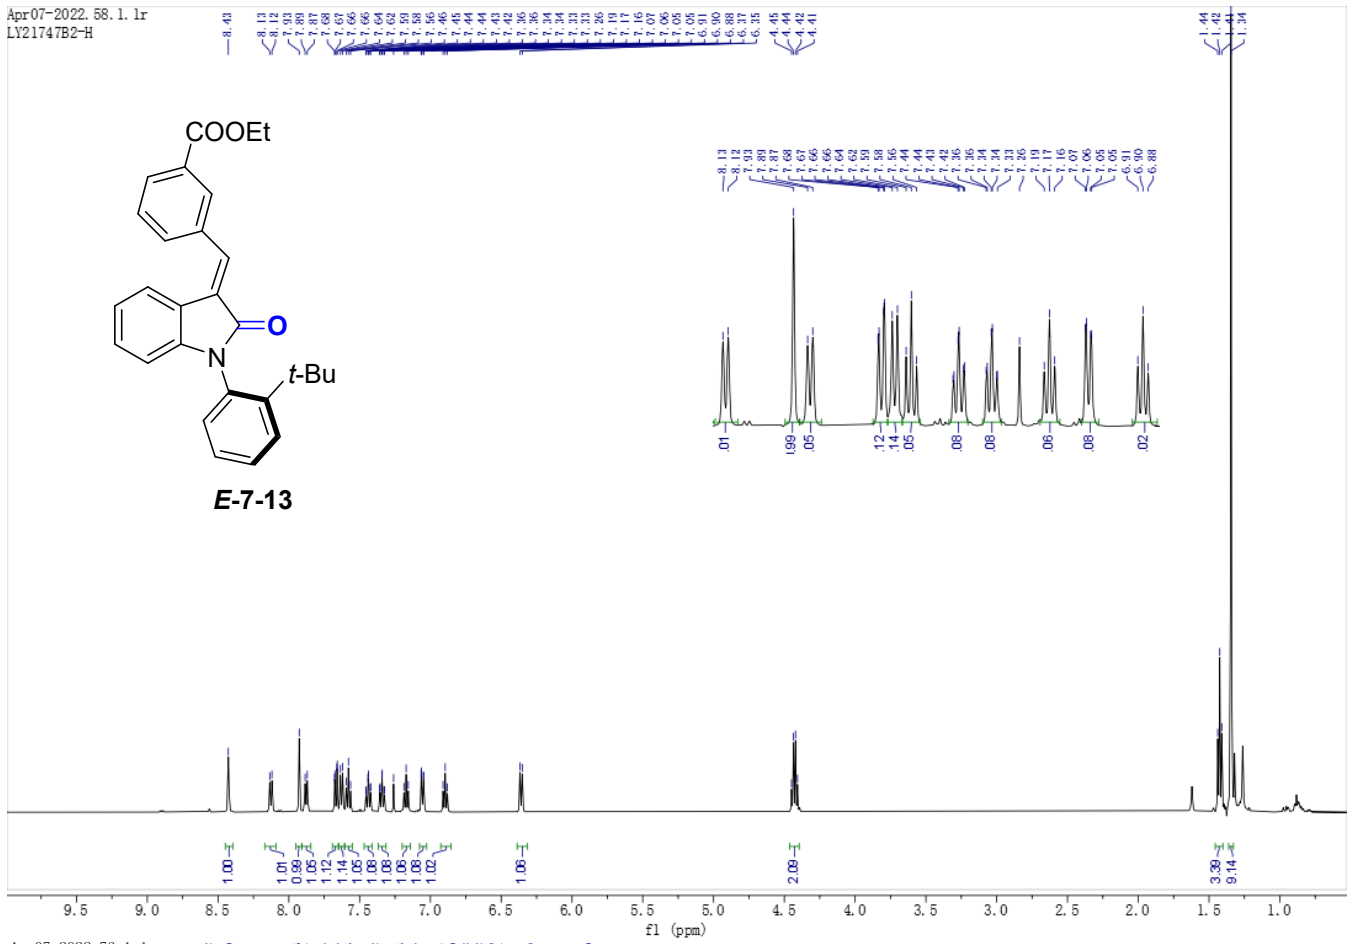

Apr07-2022. 73.1.1r  
21747B2-C

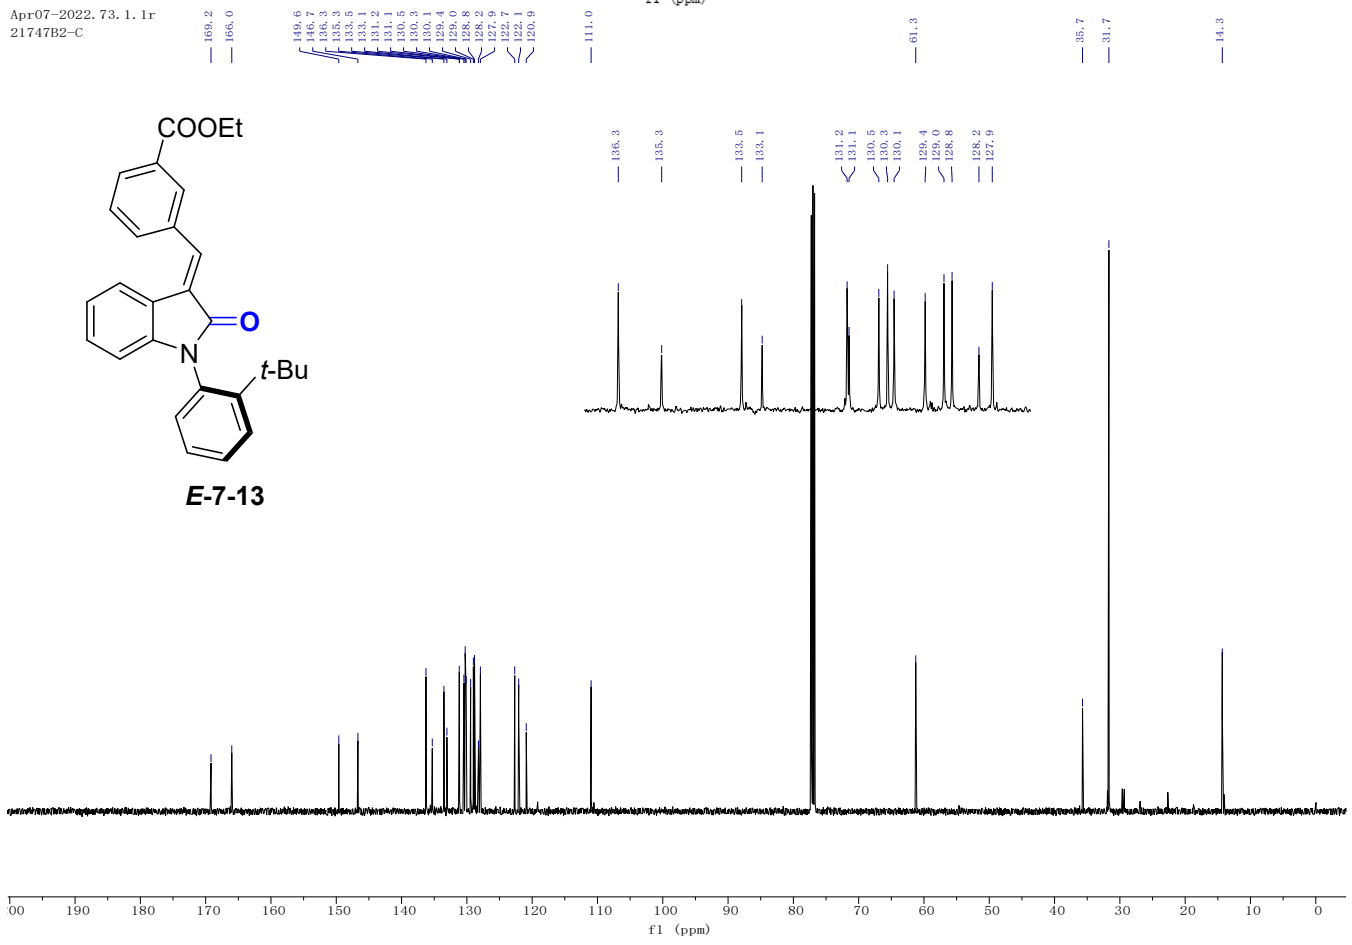

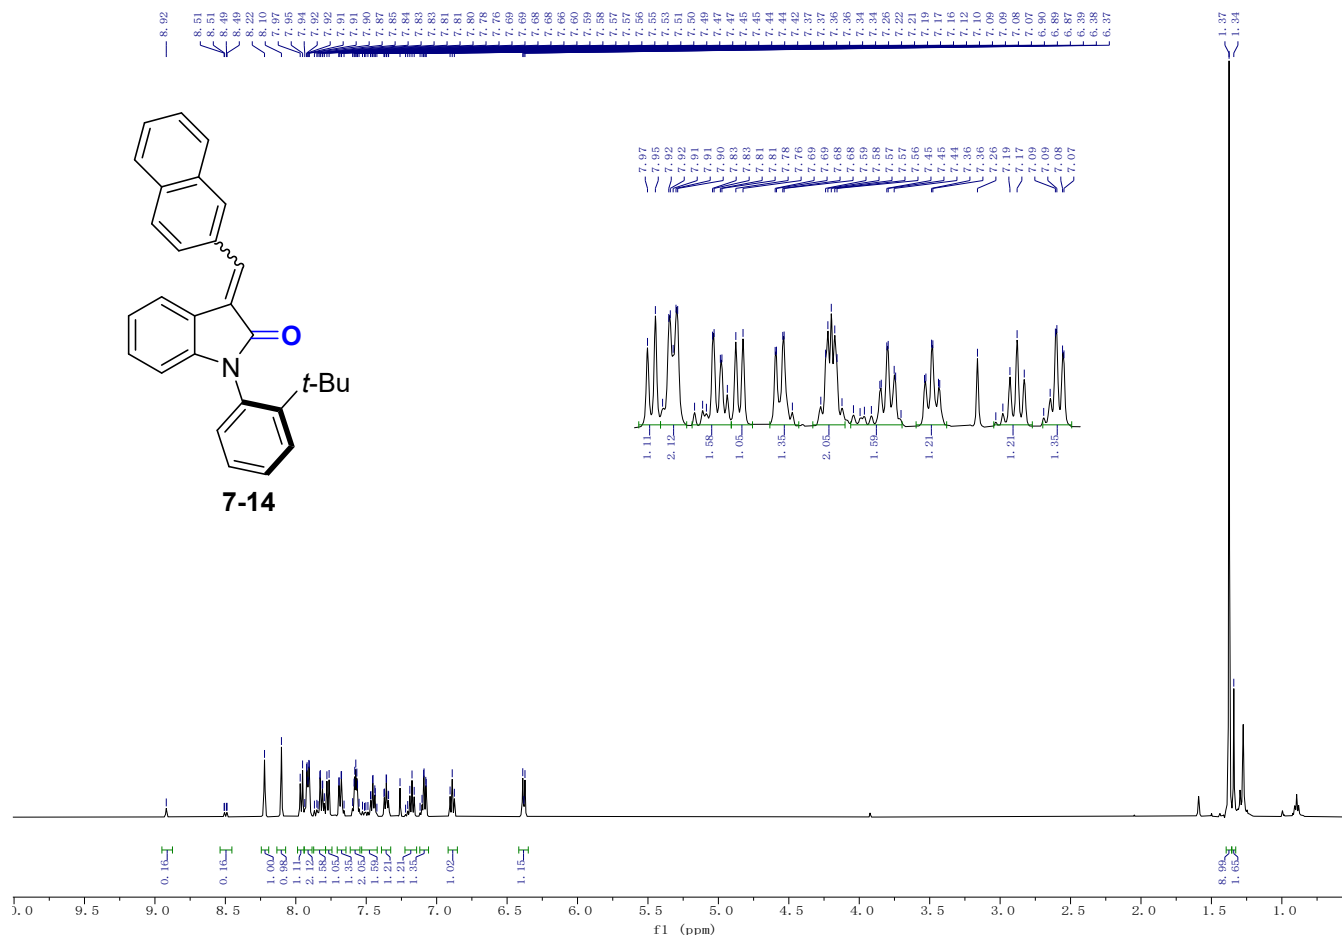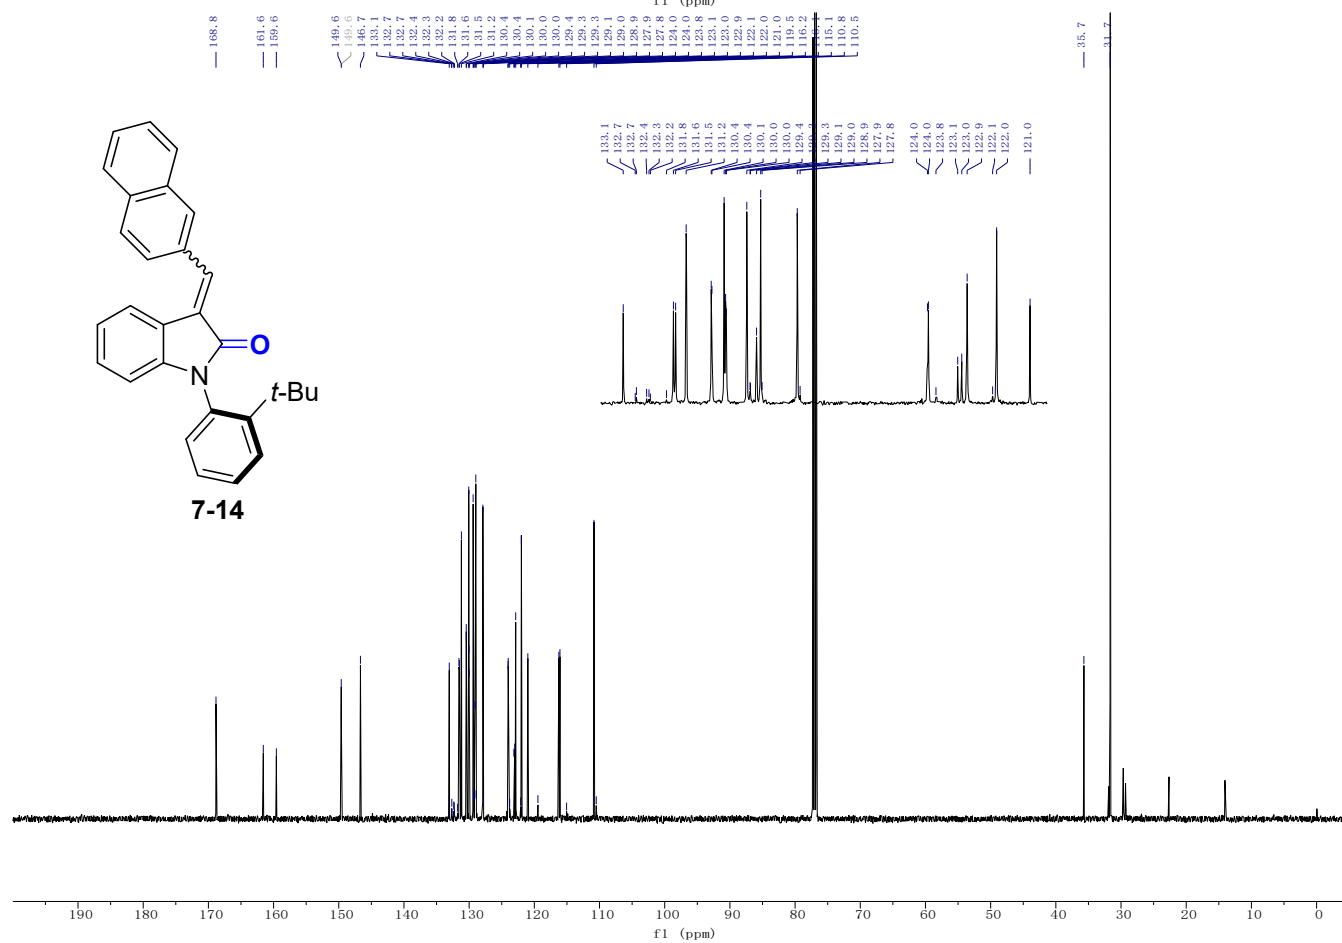

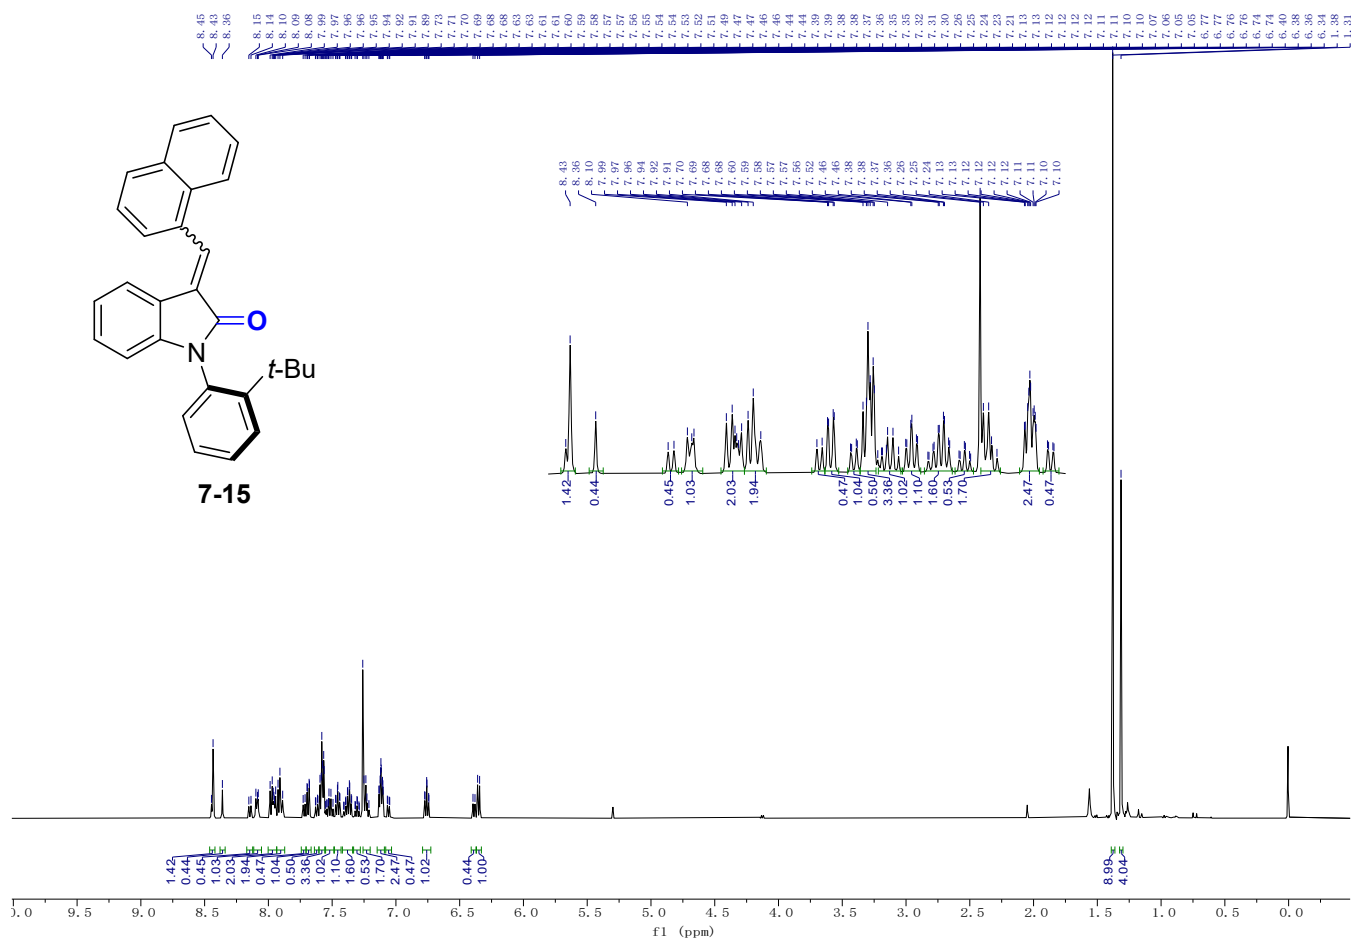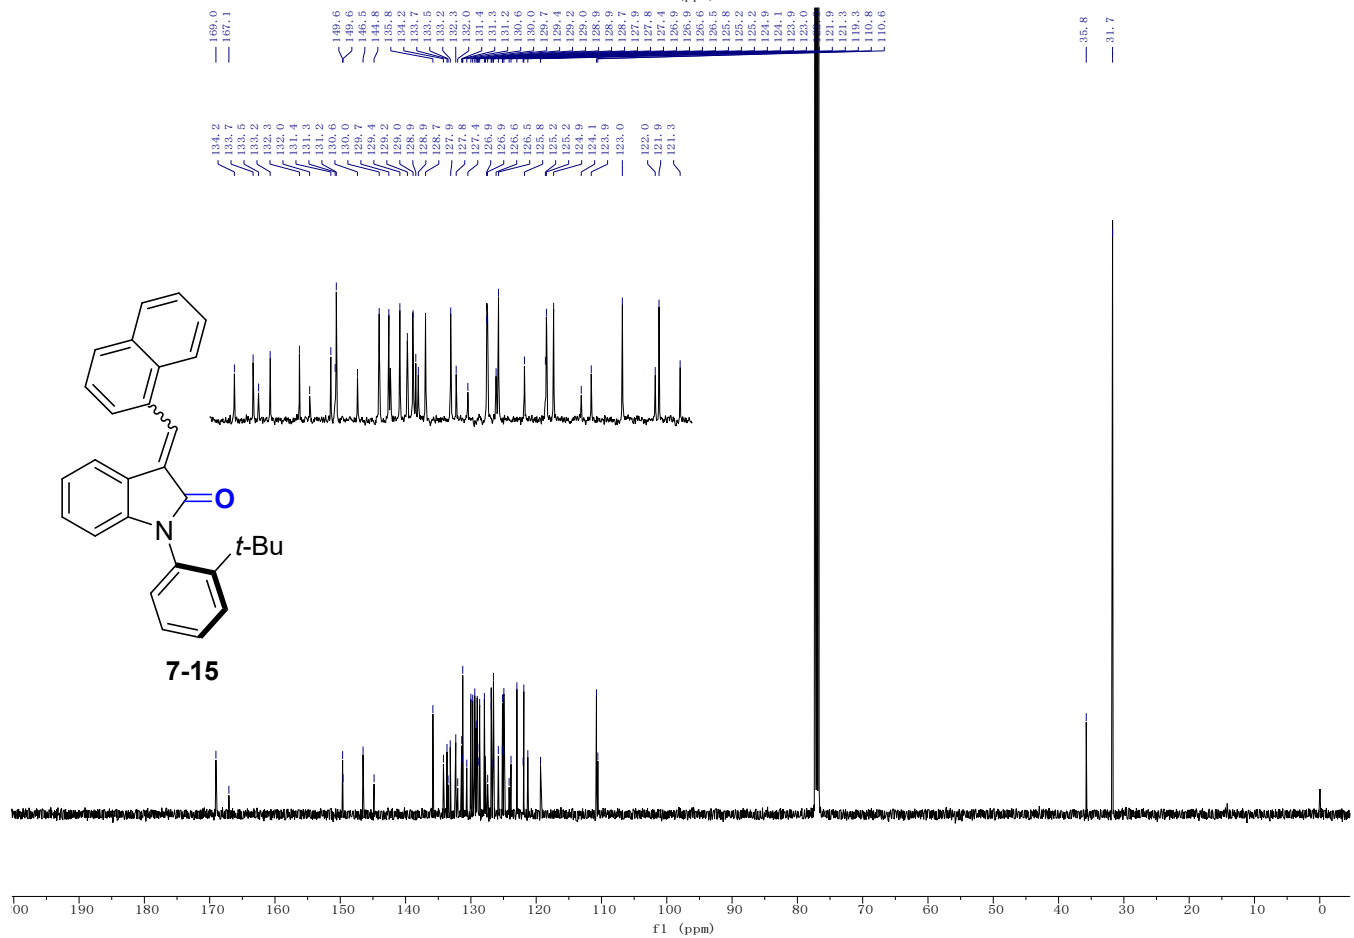

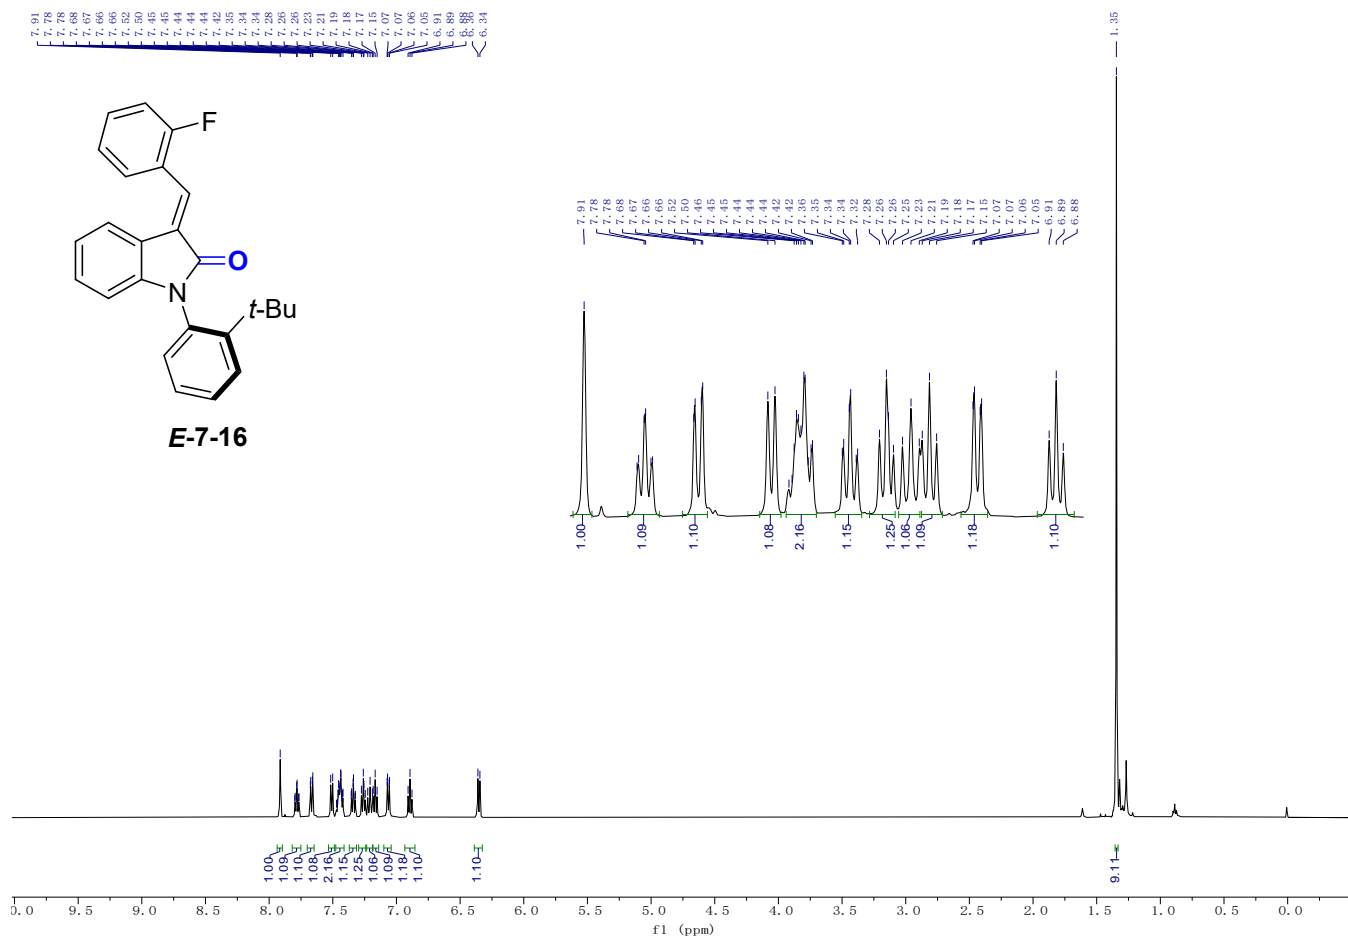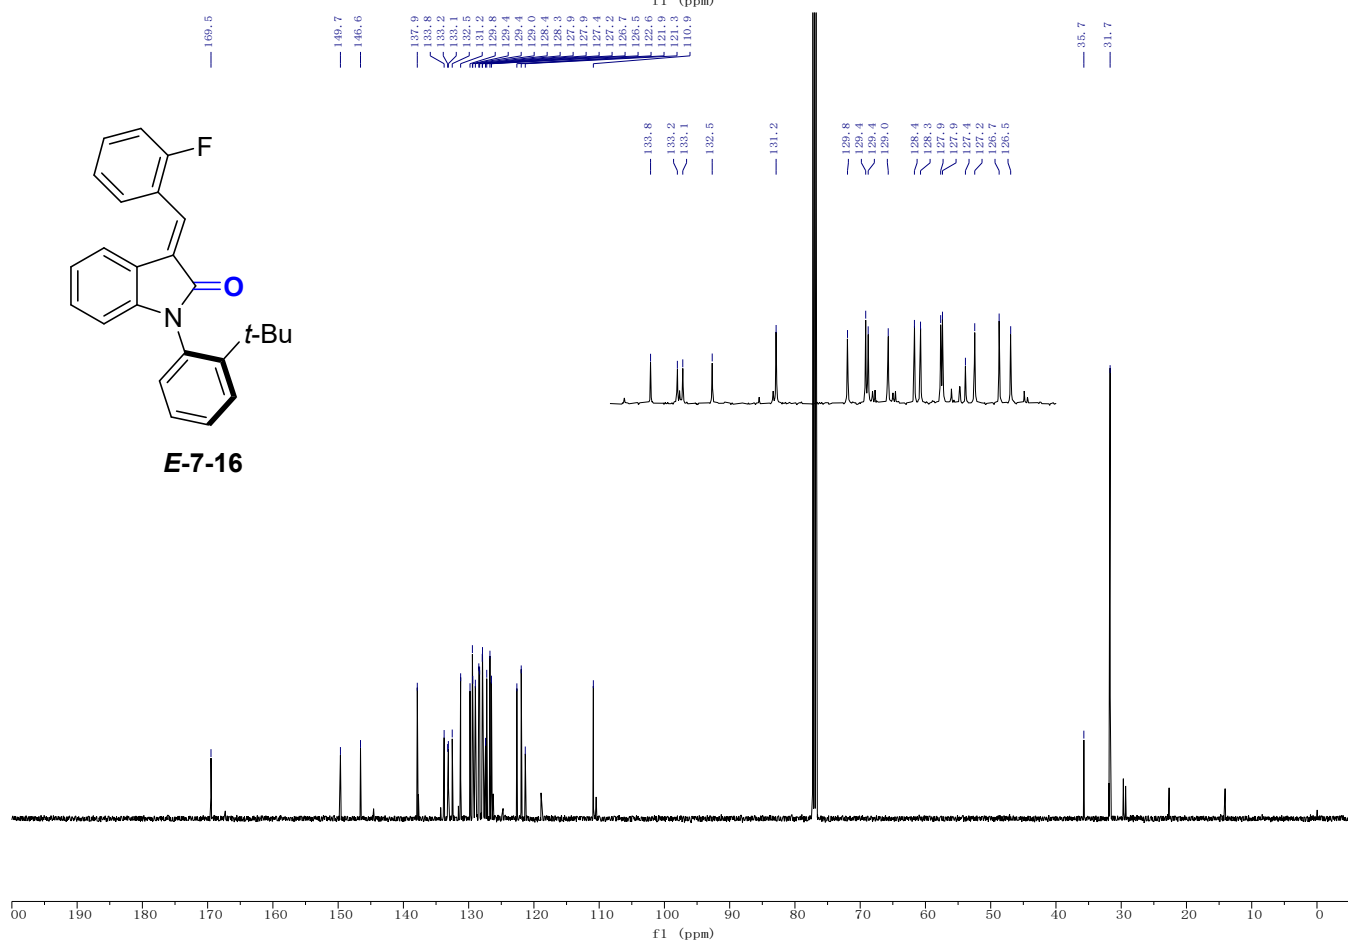

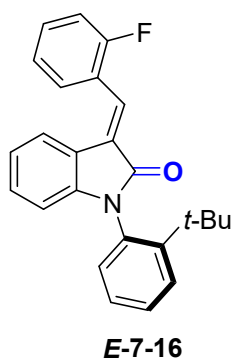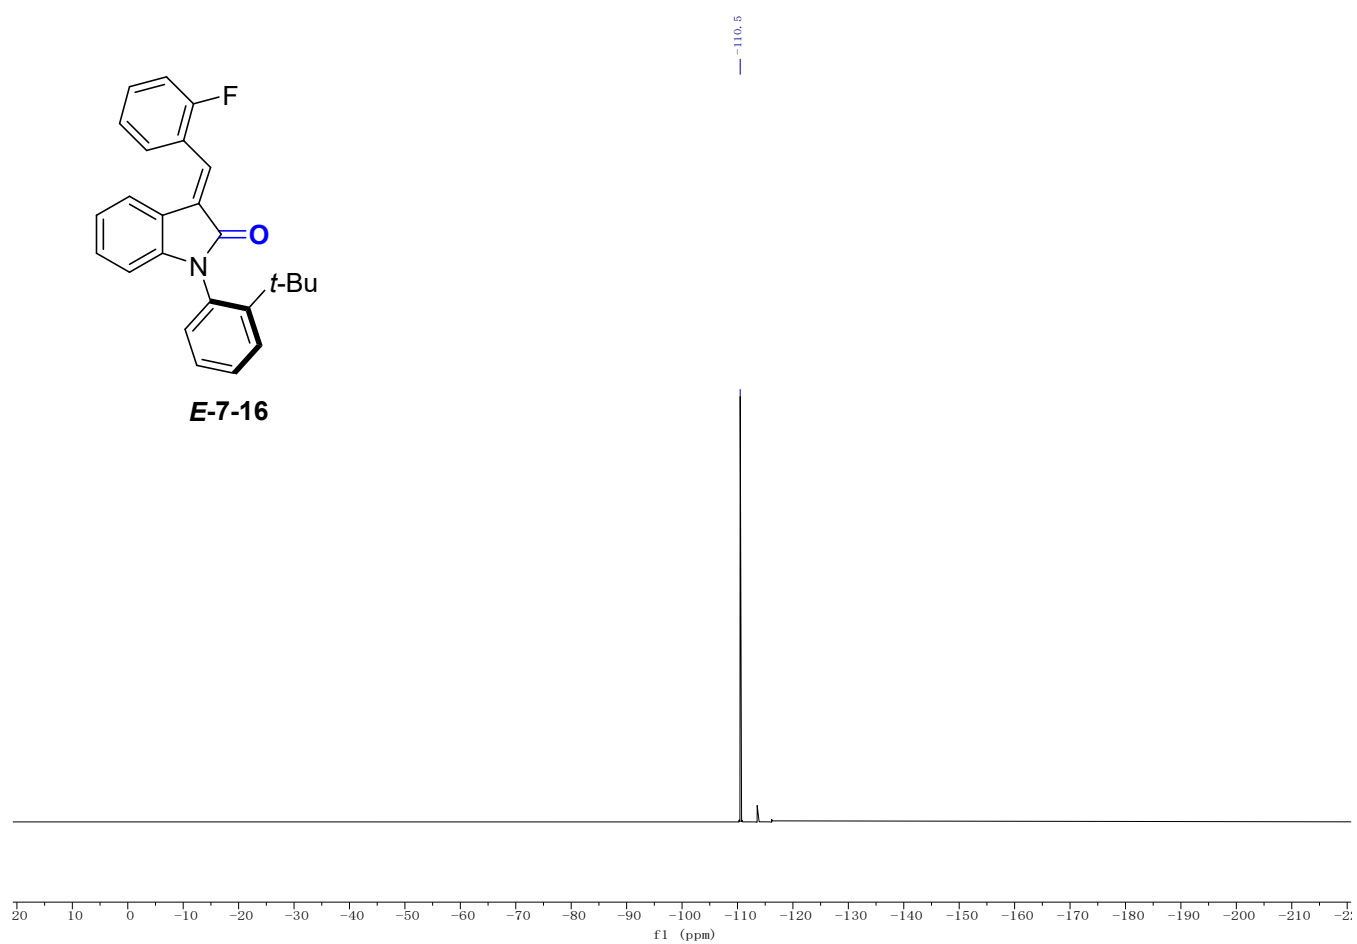



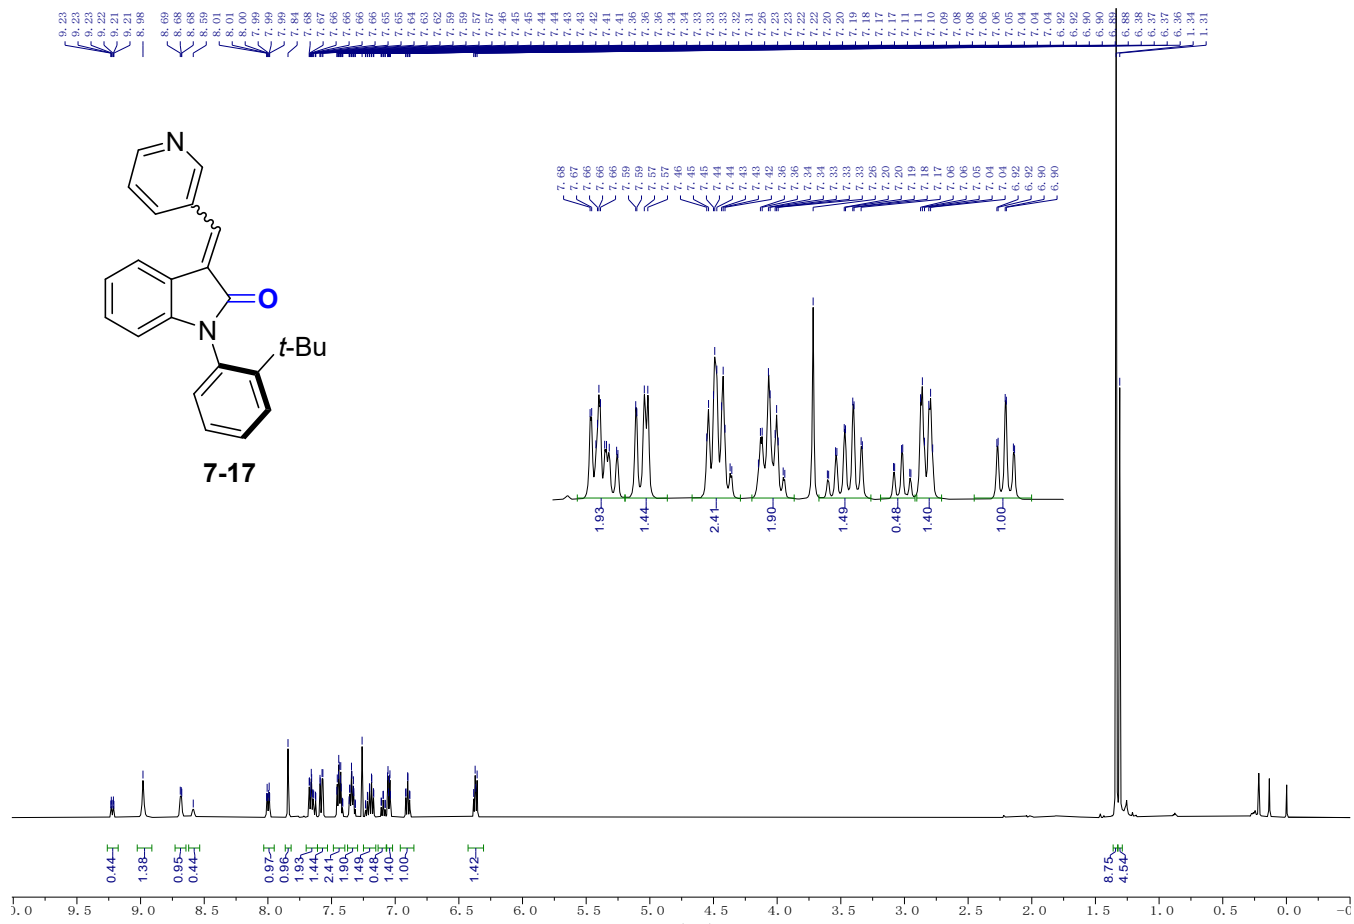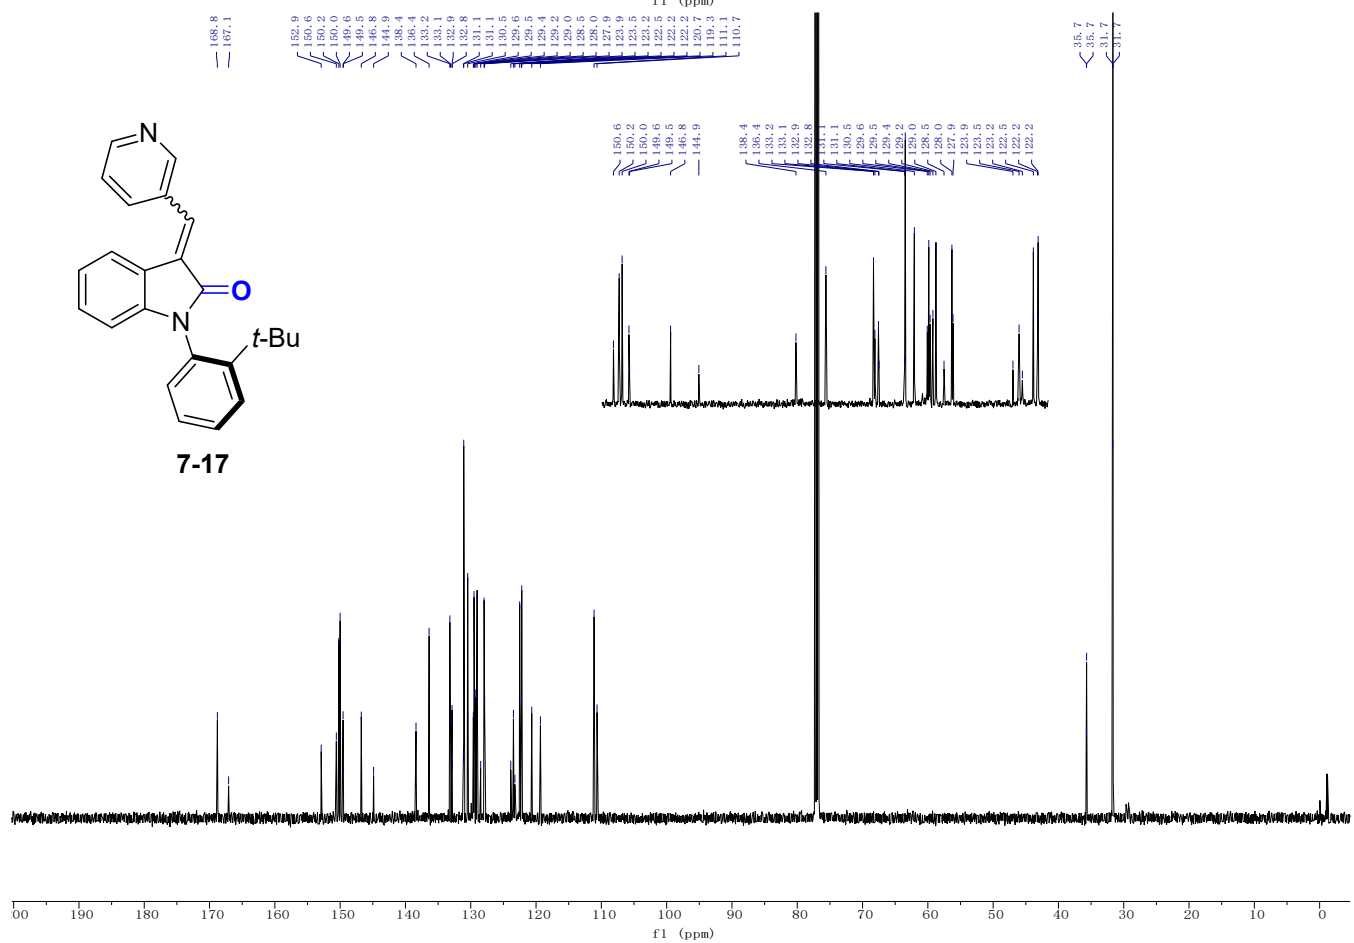

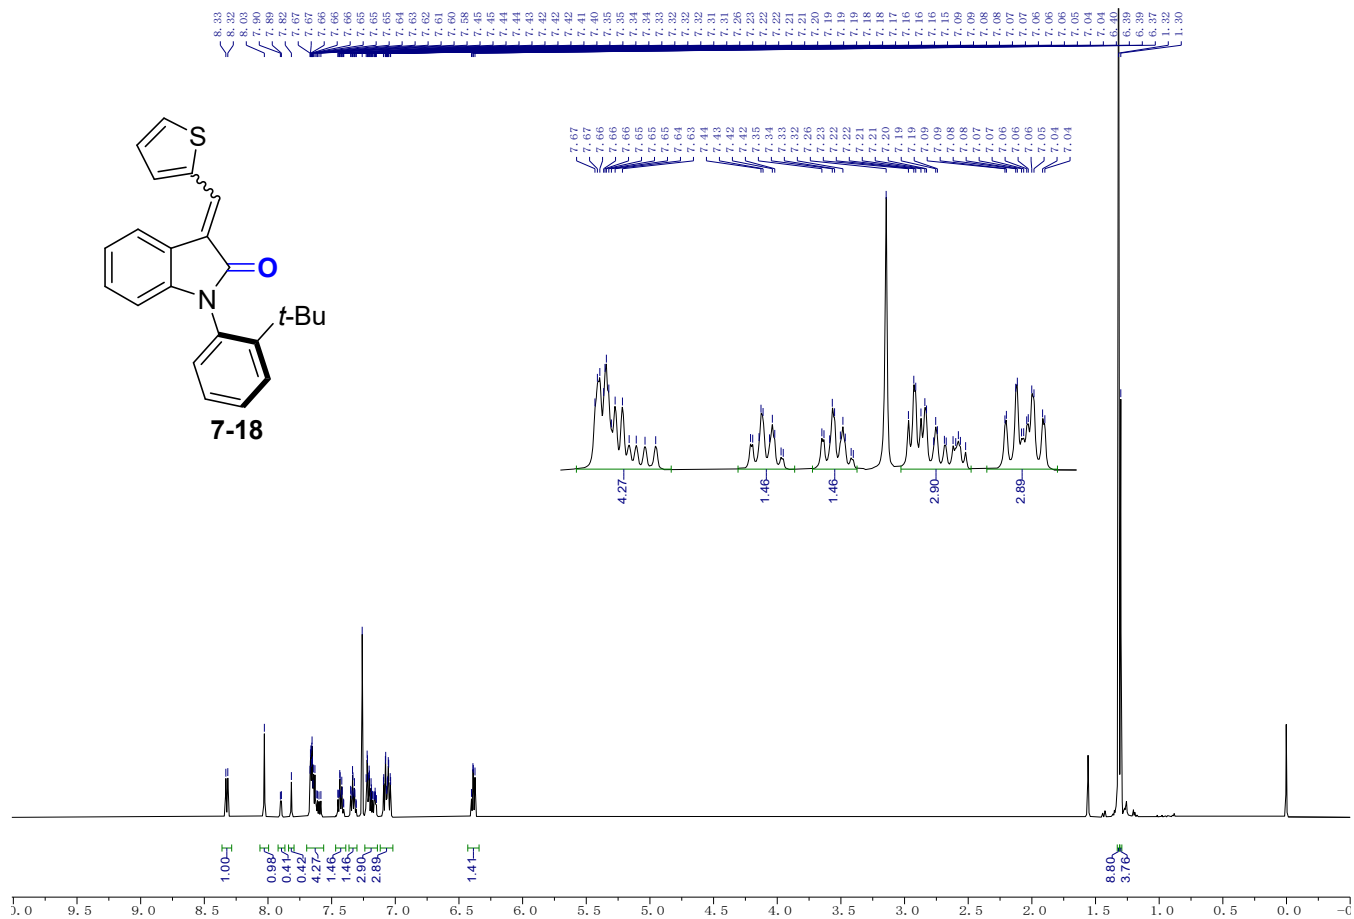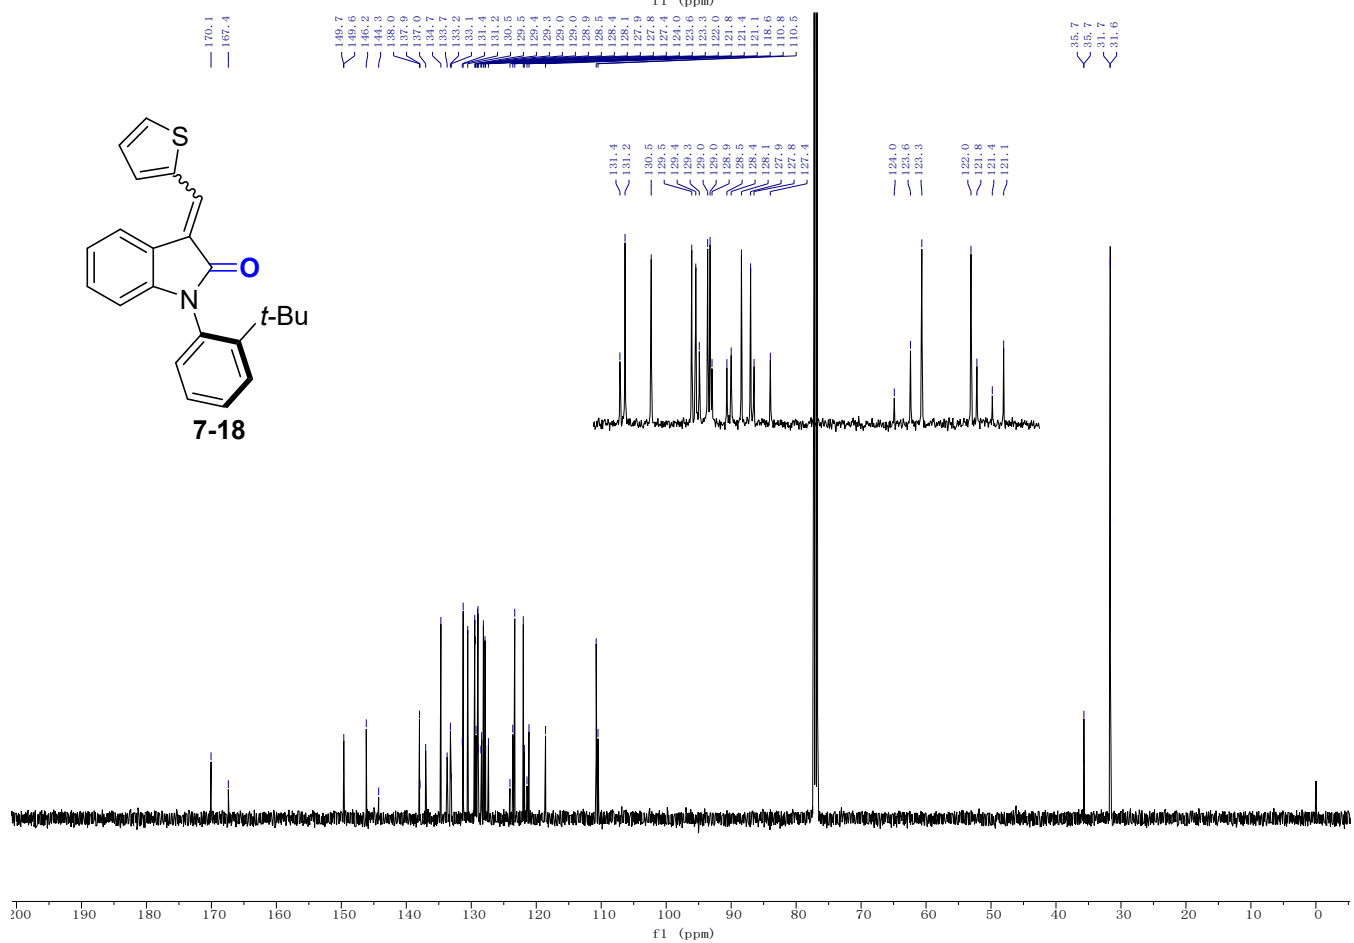

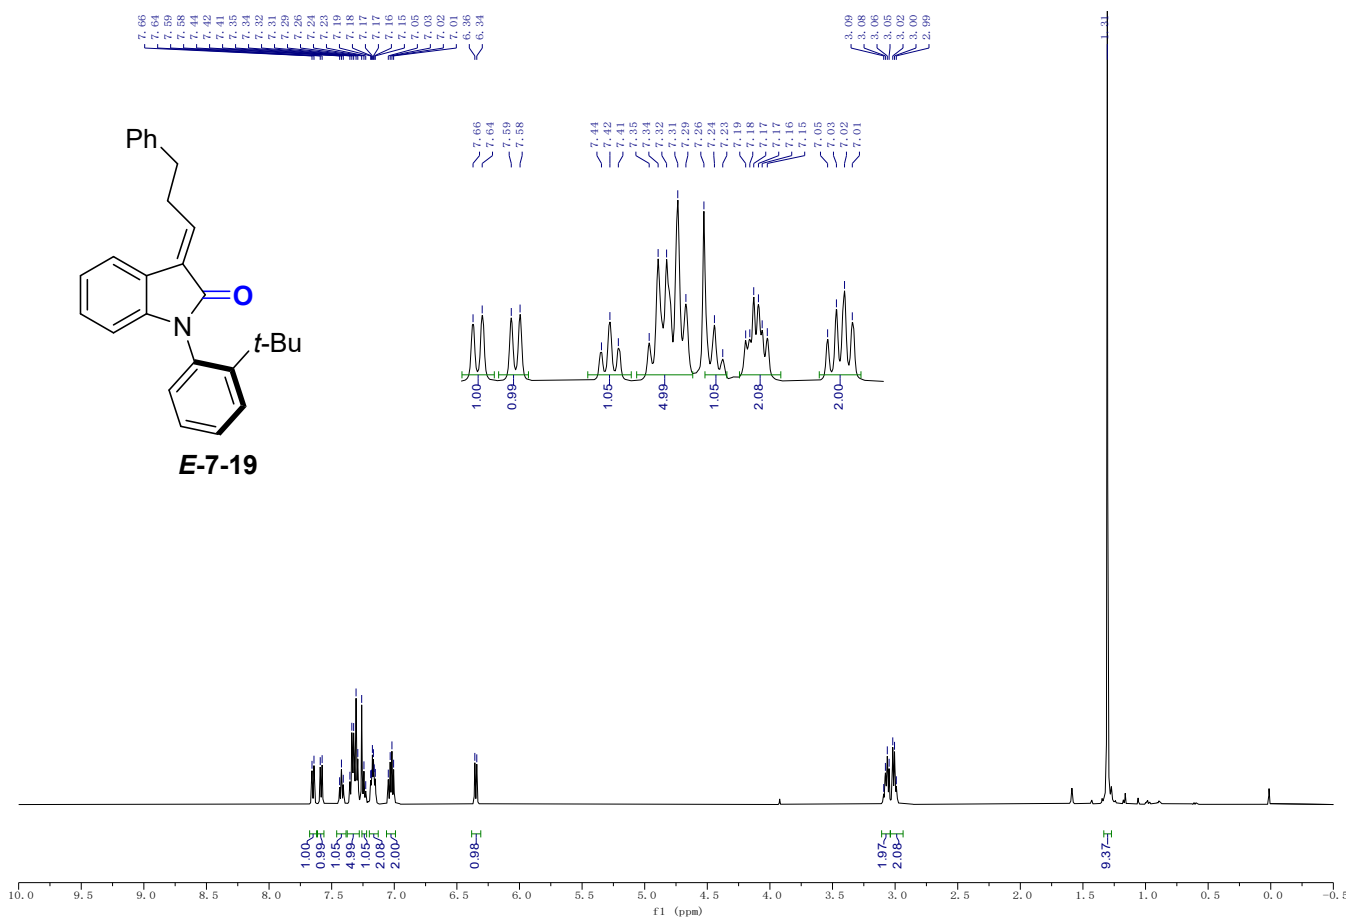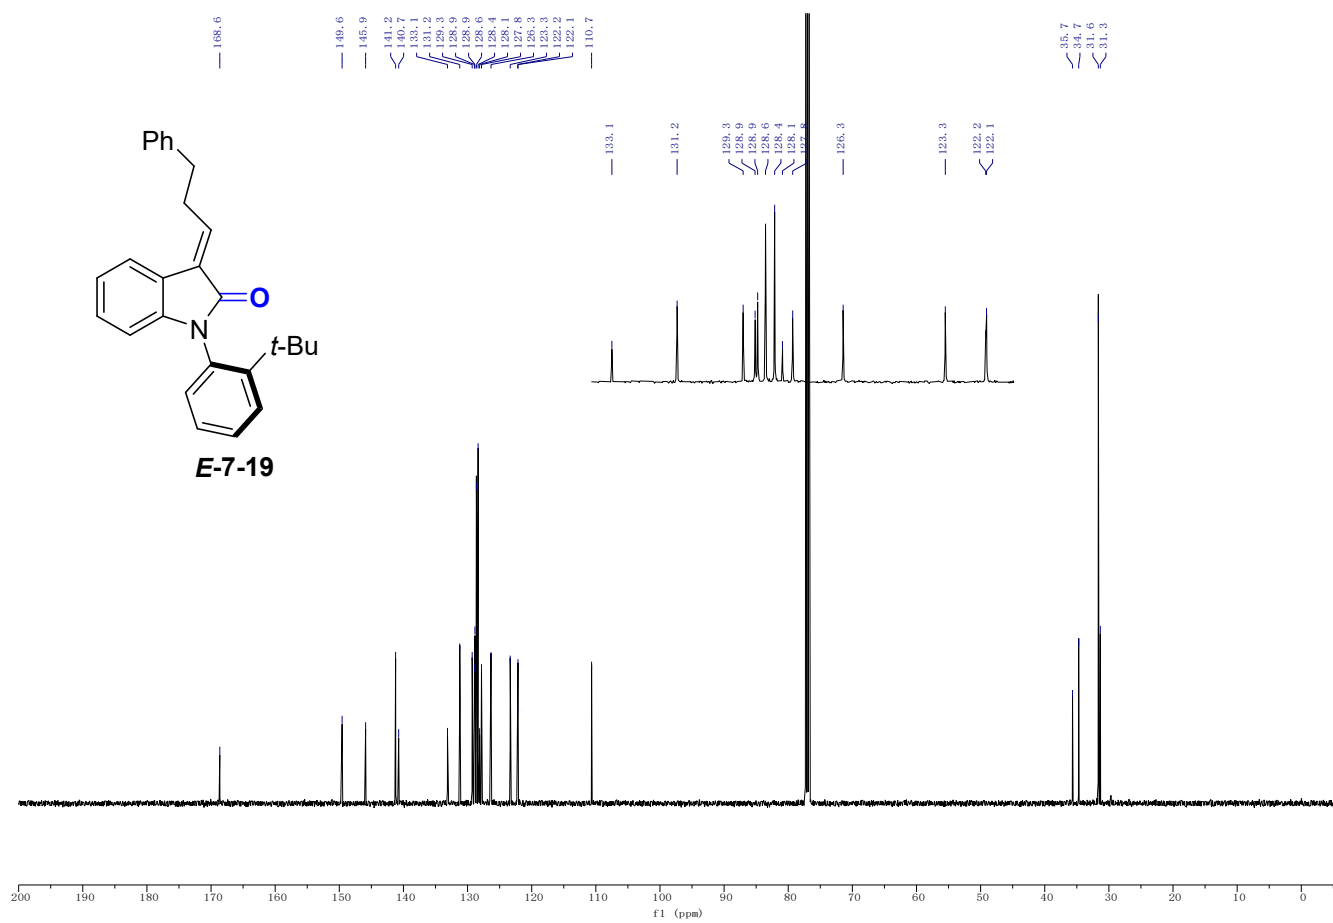

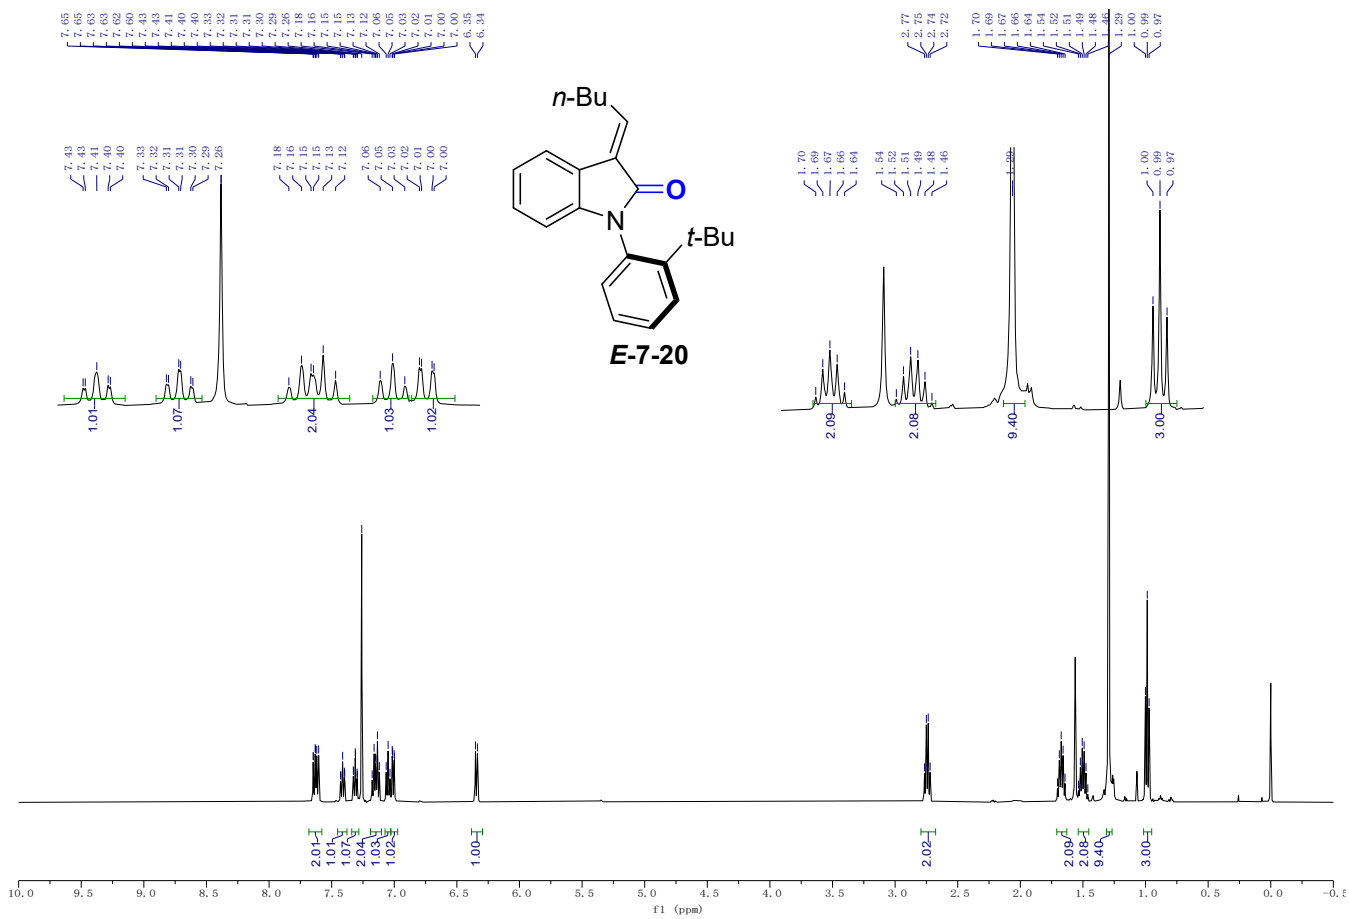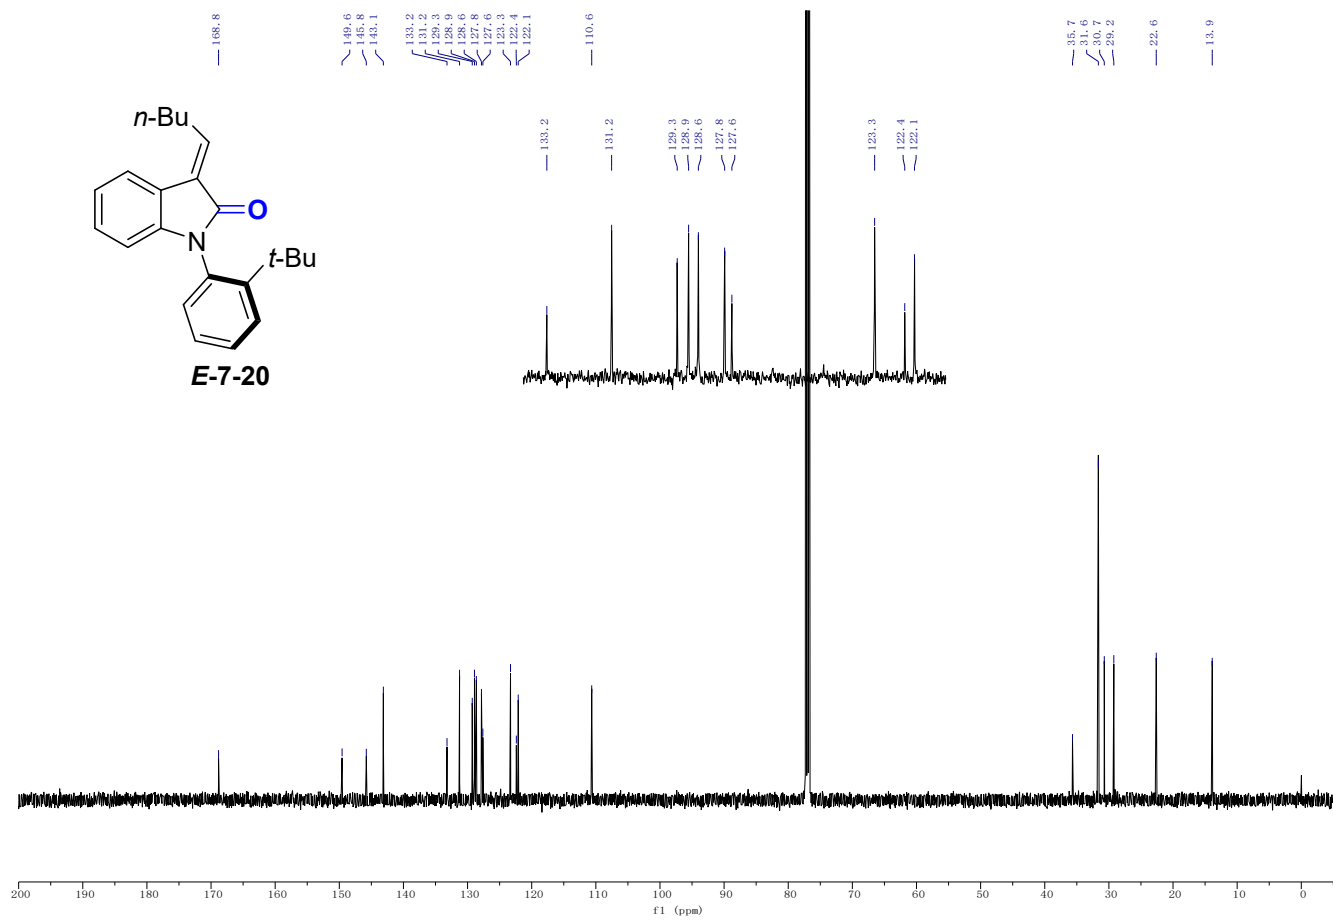

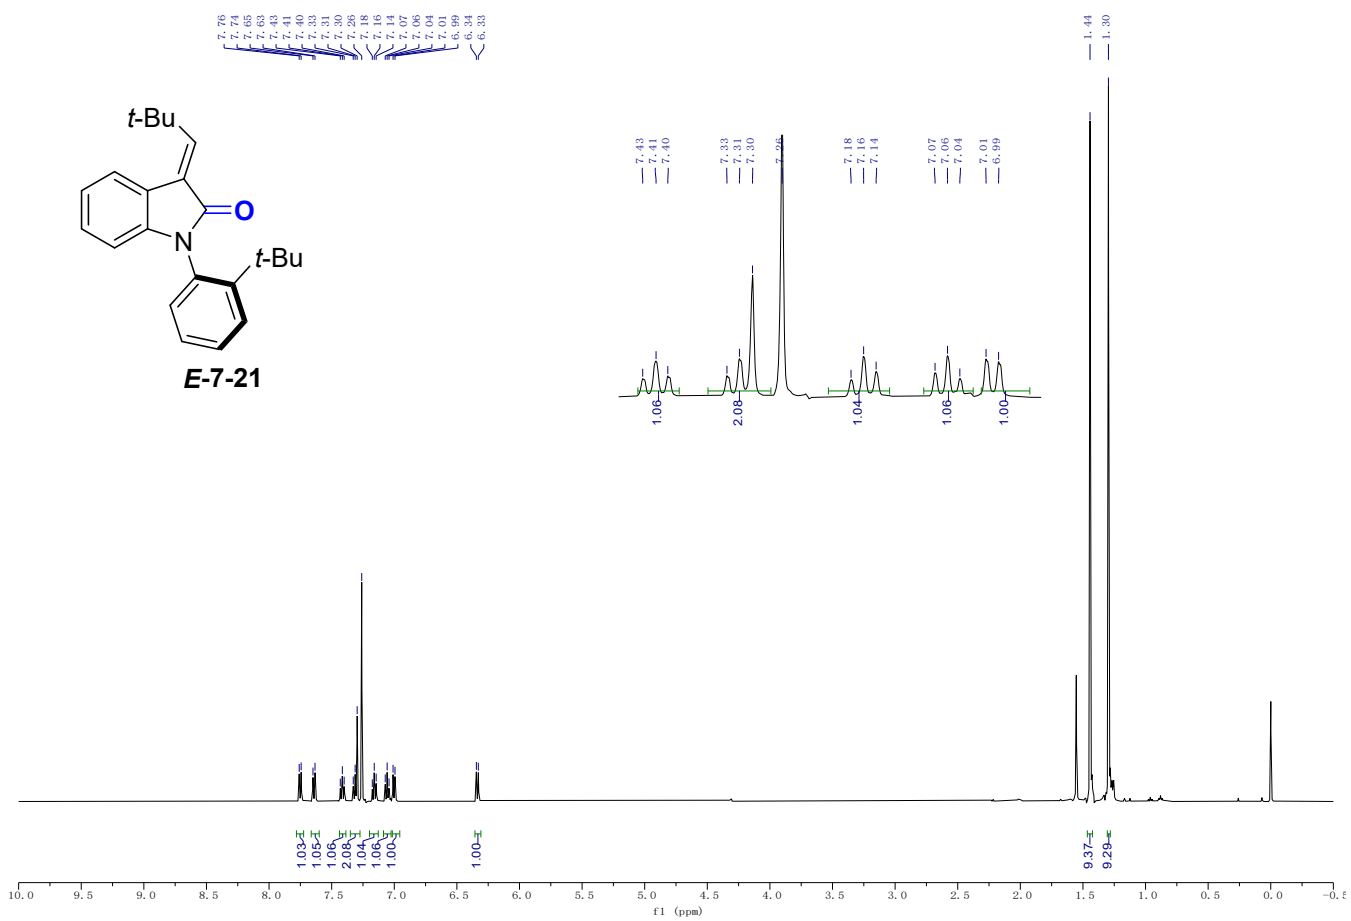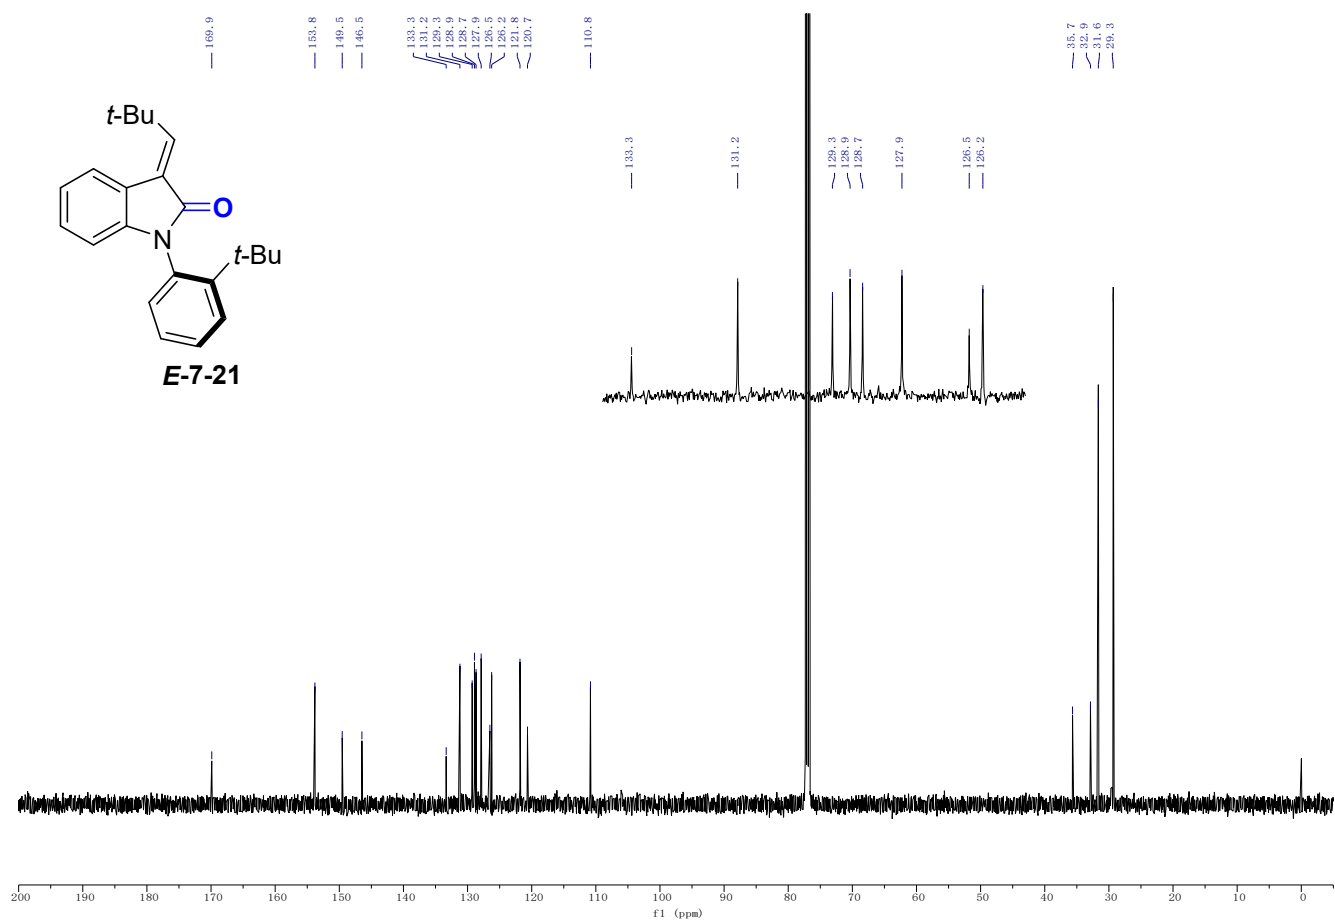

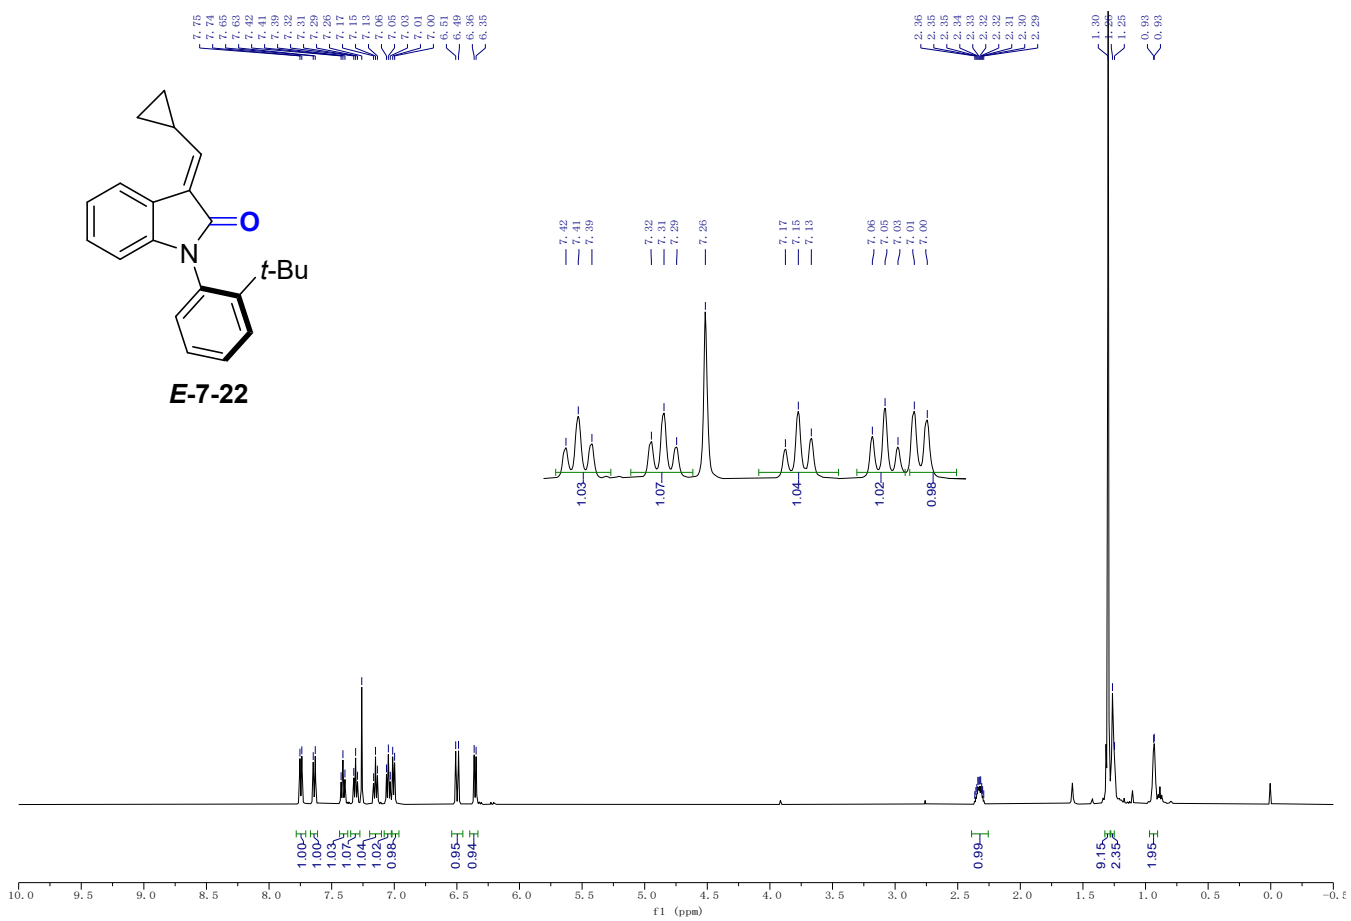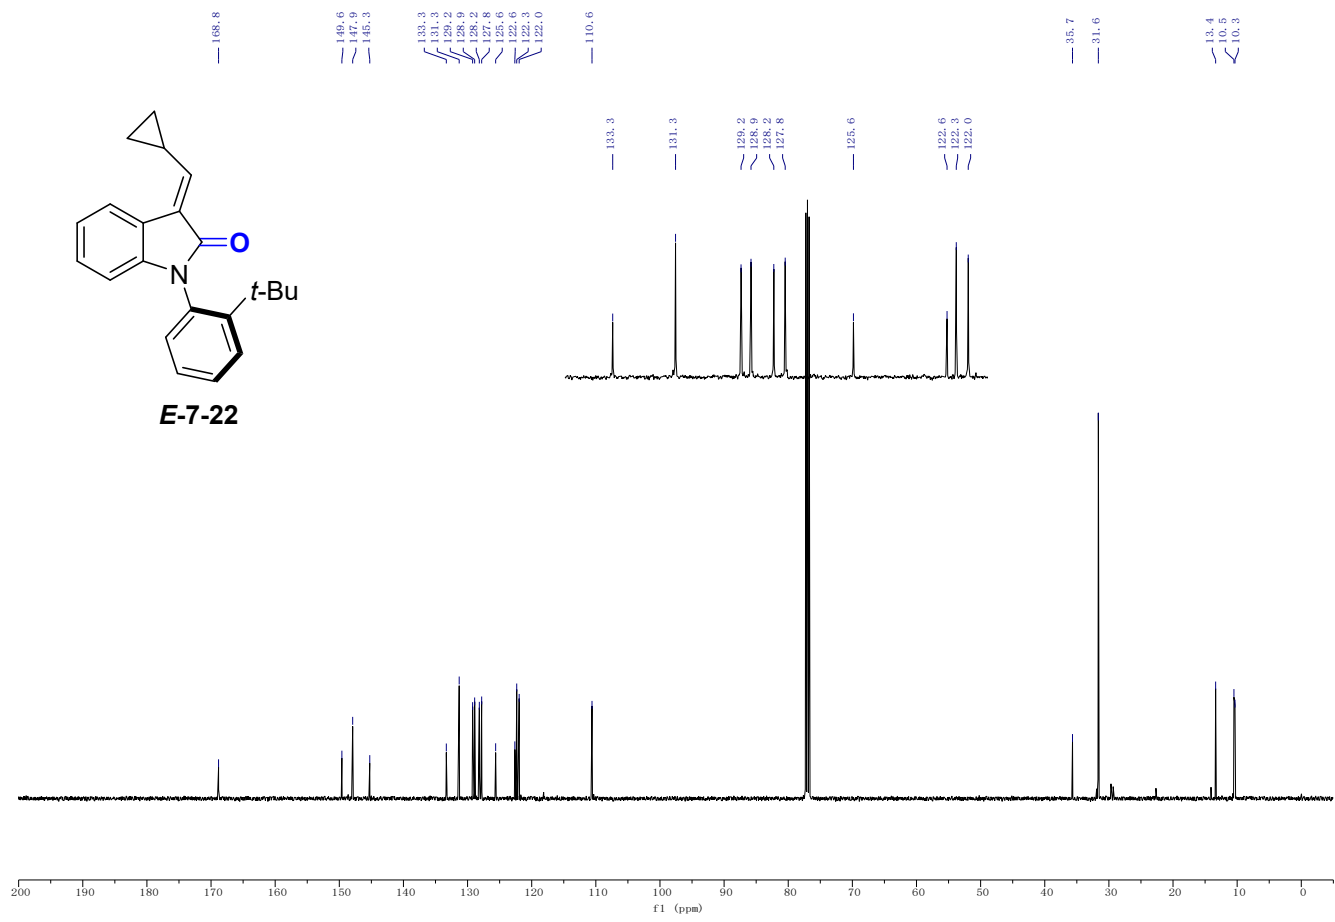

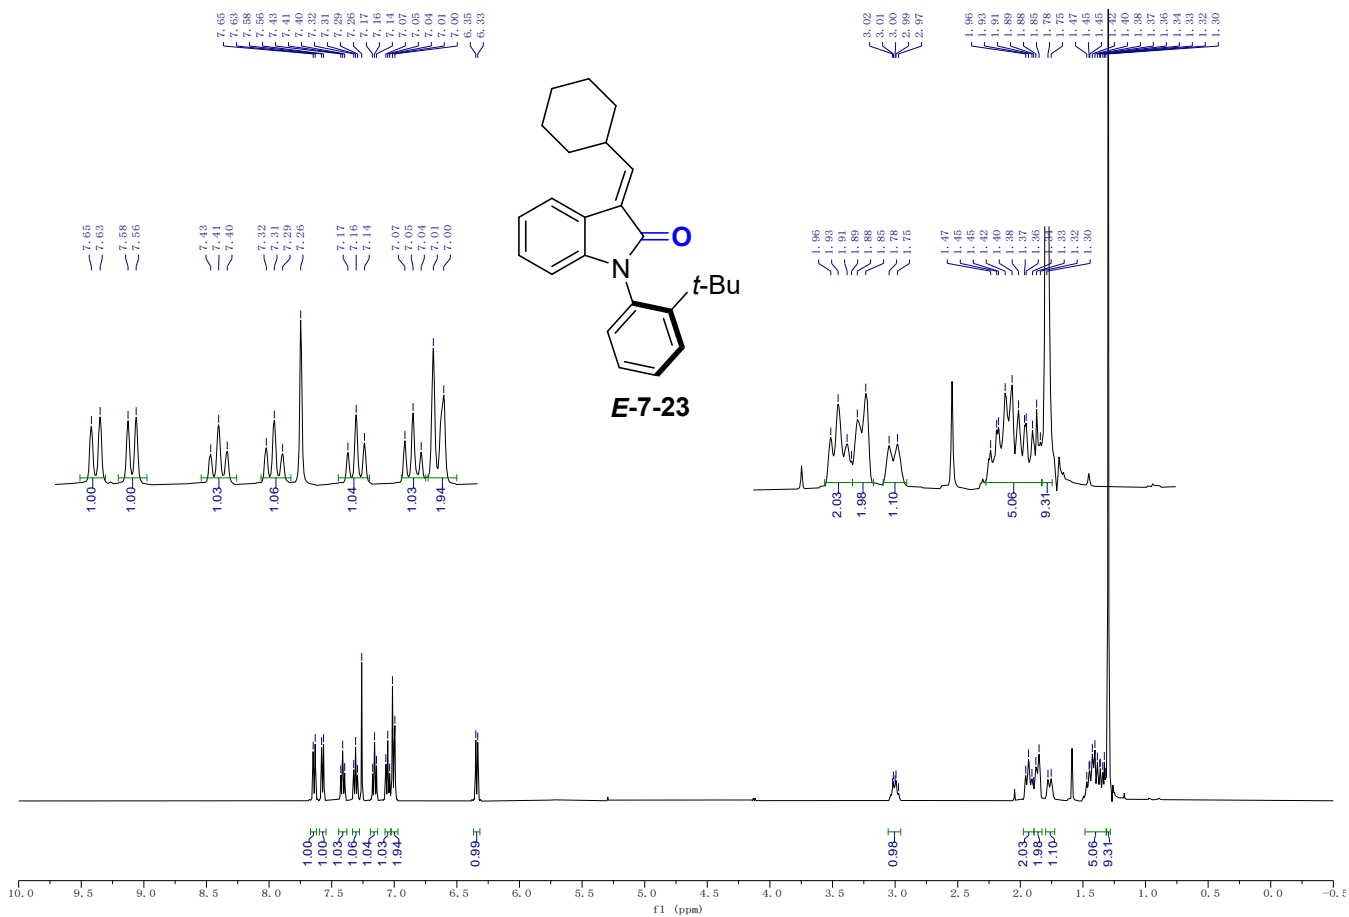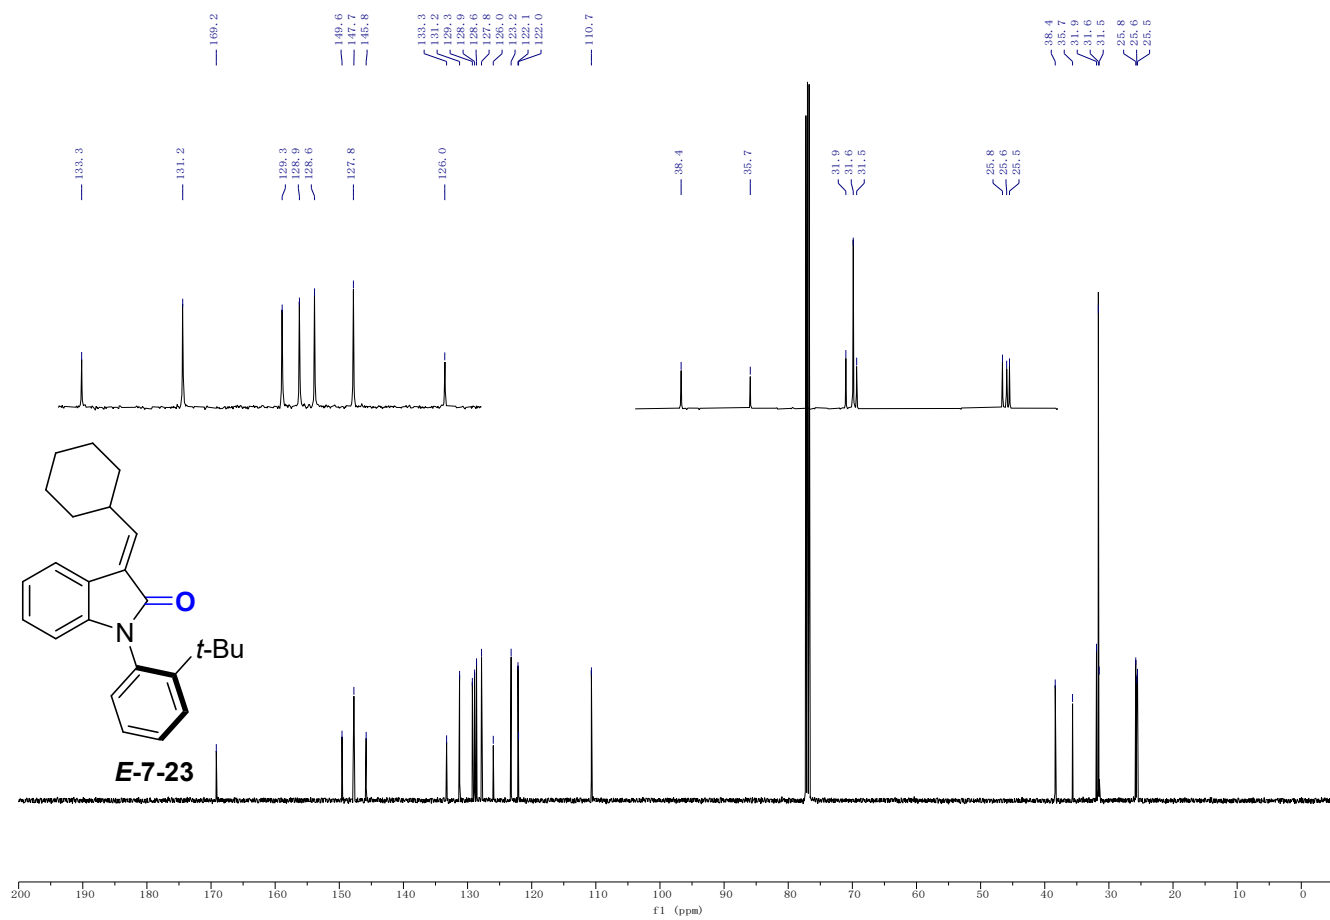

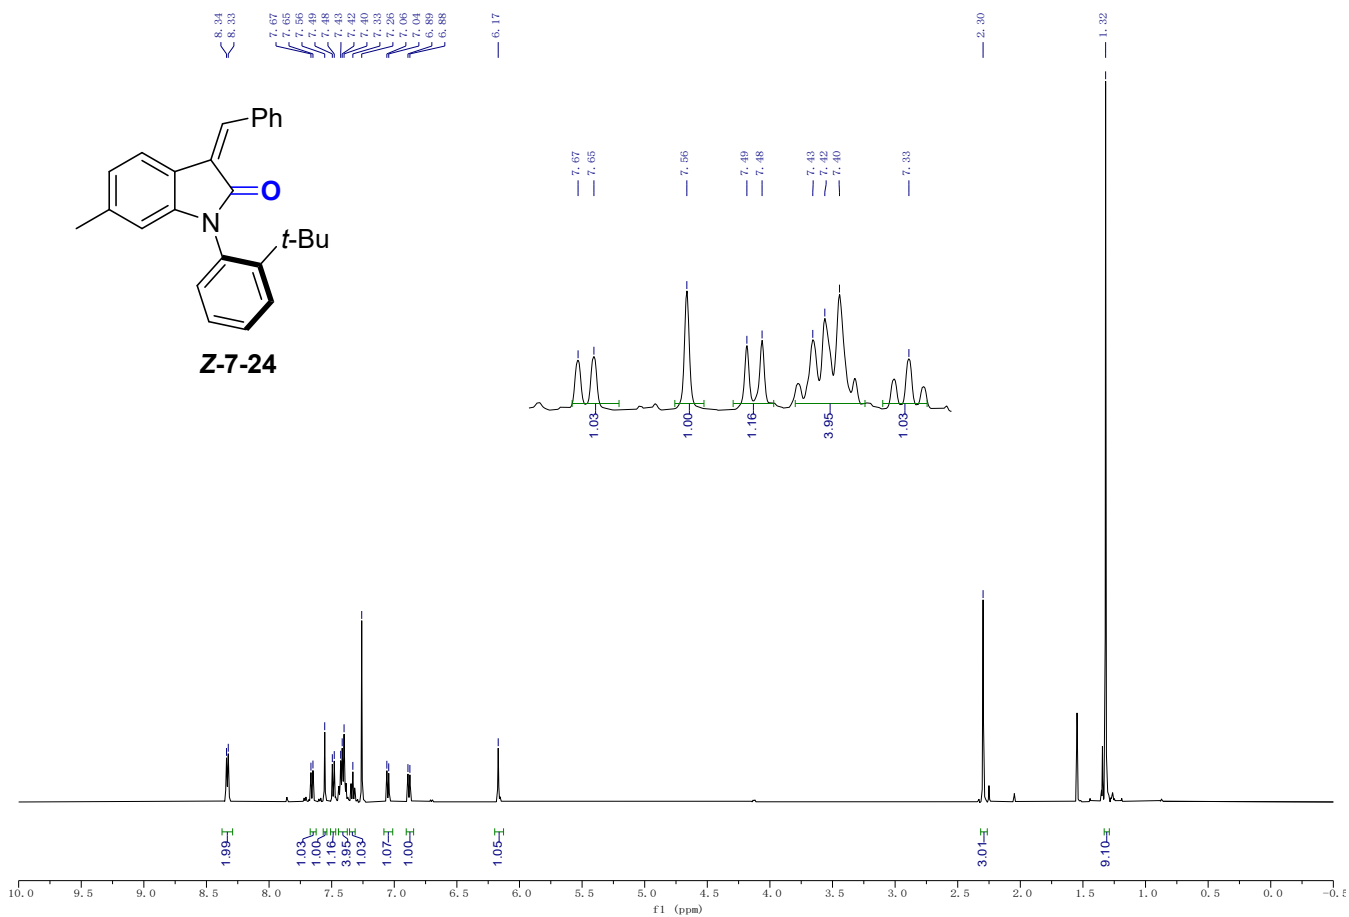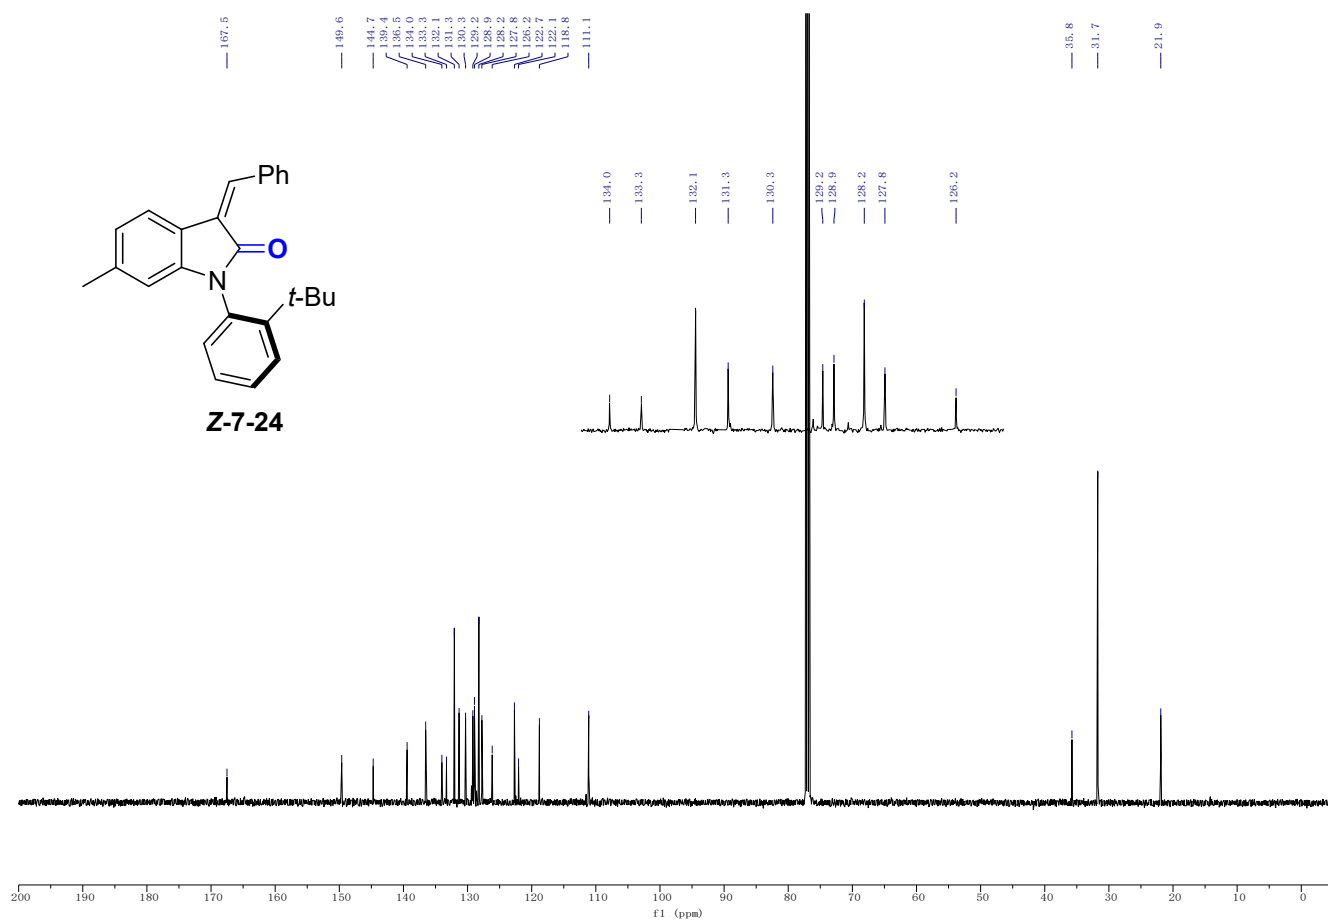



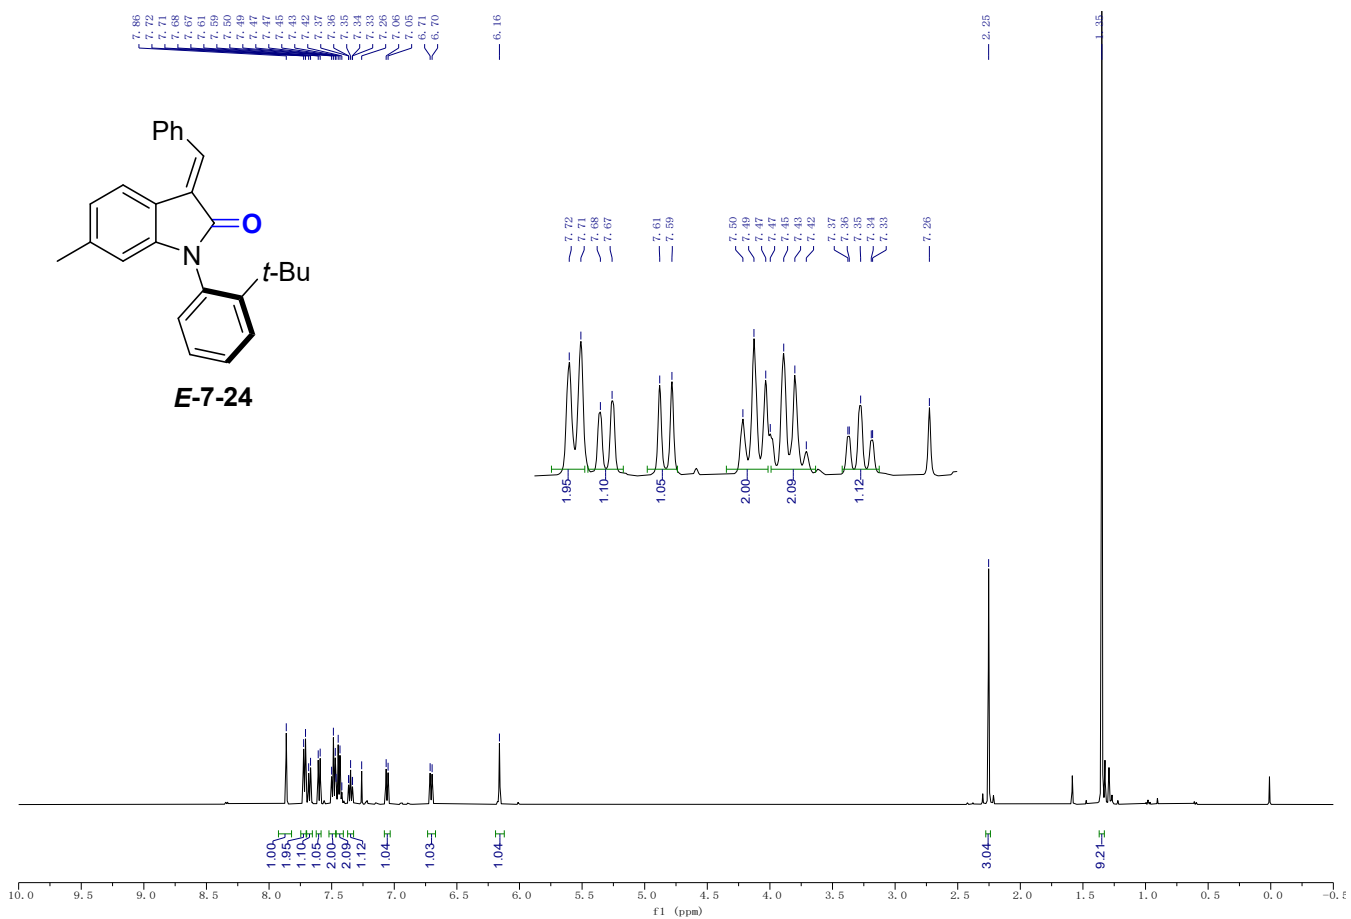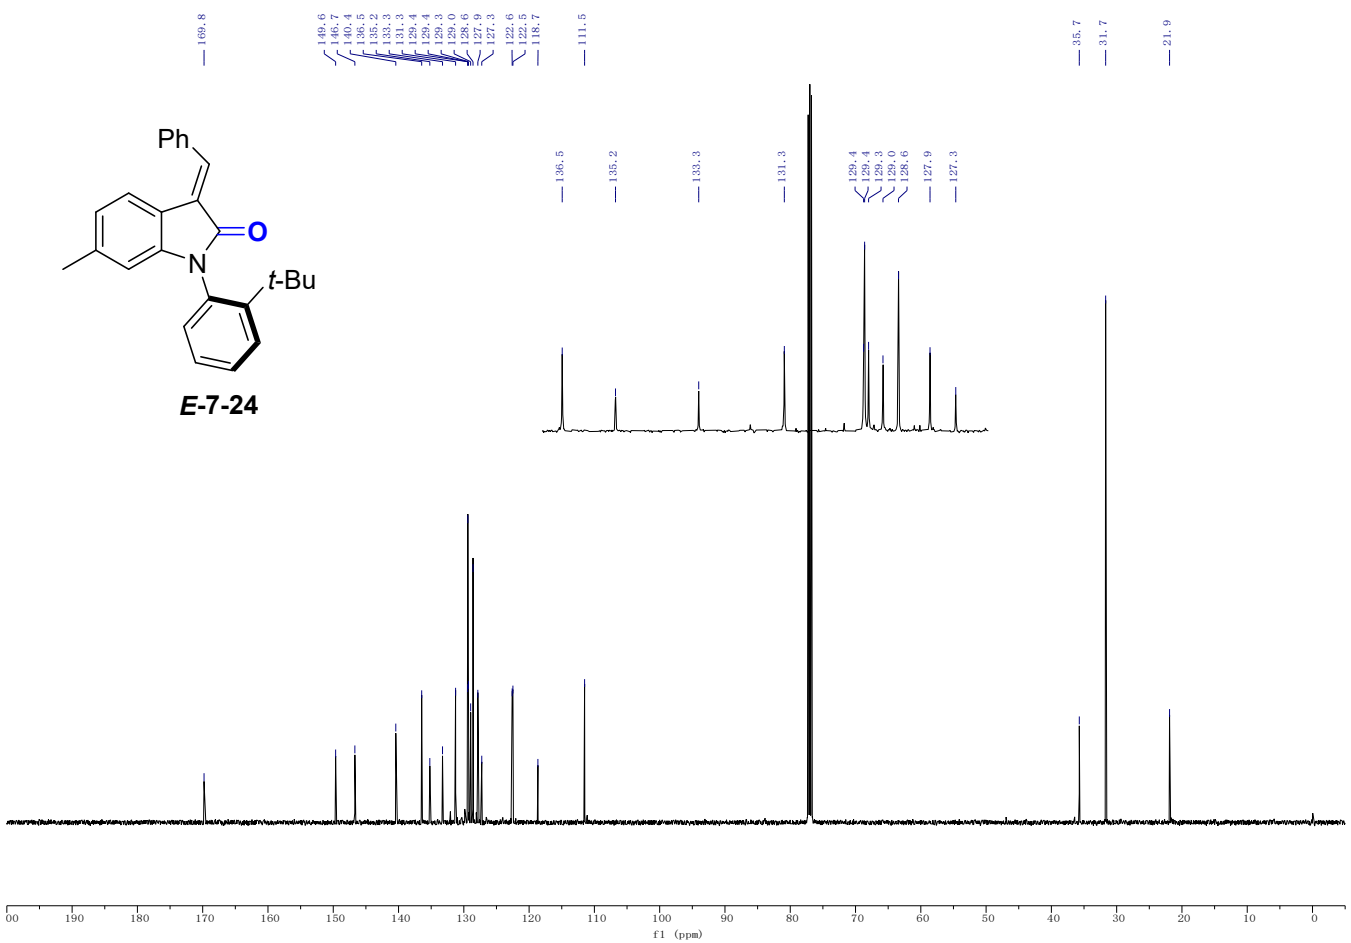

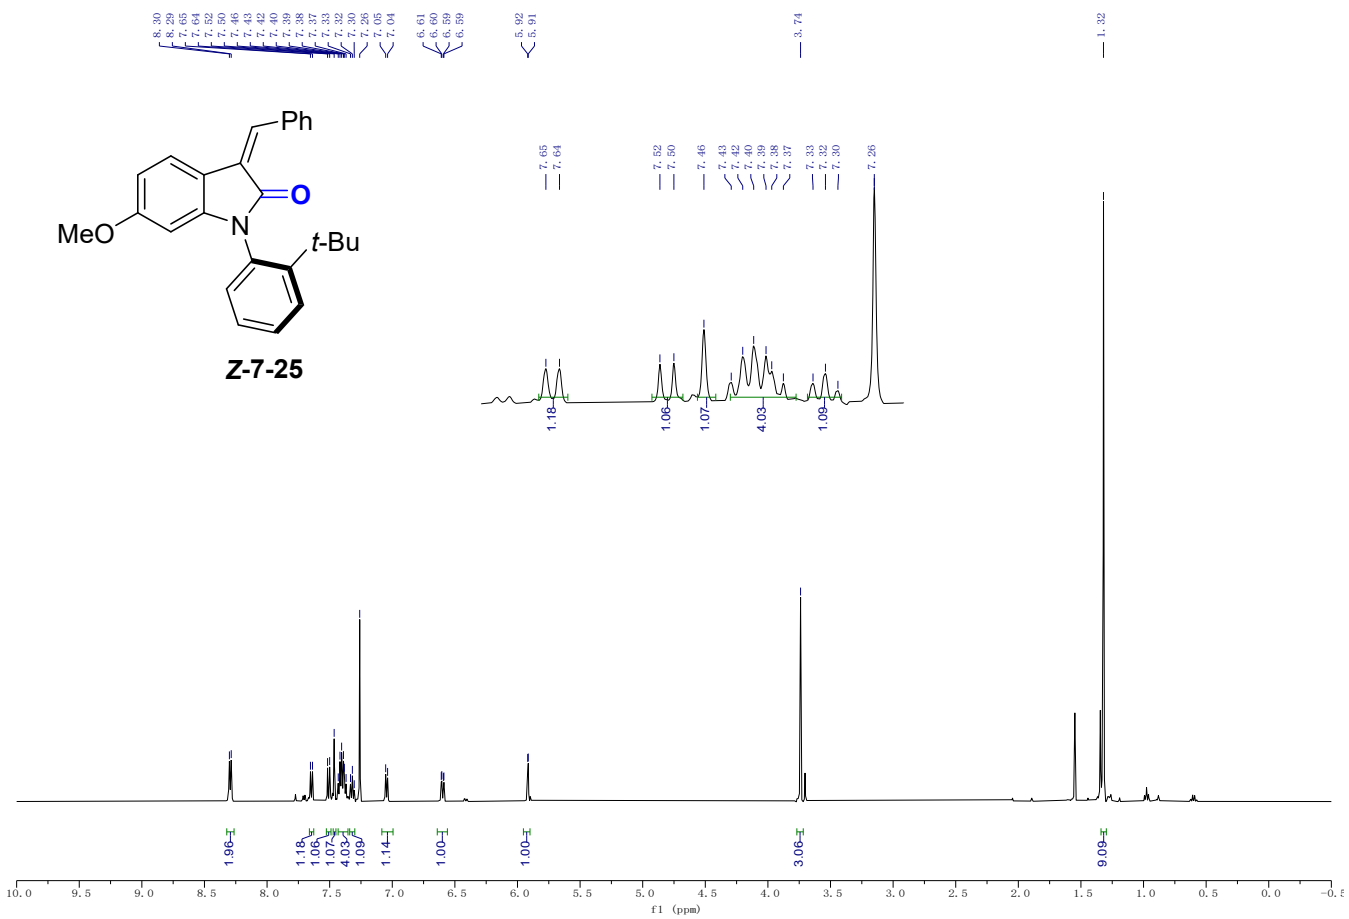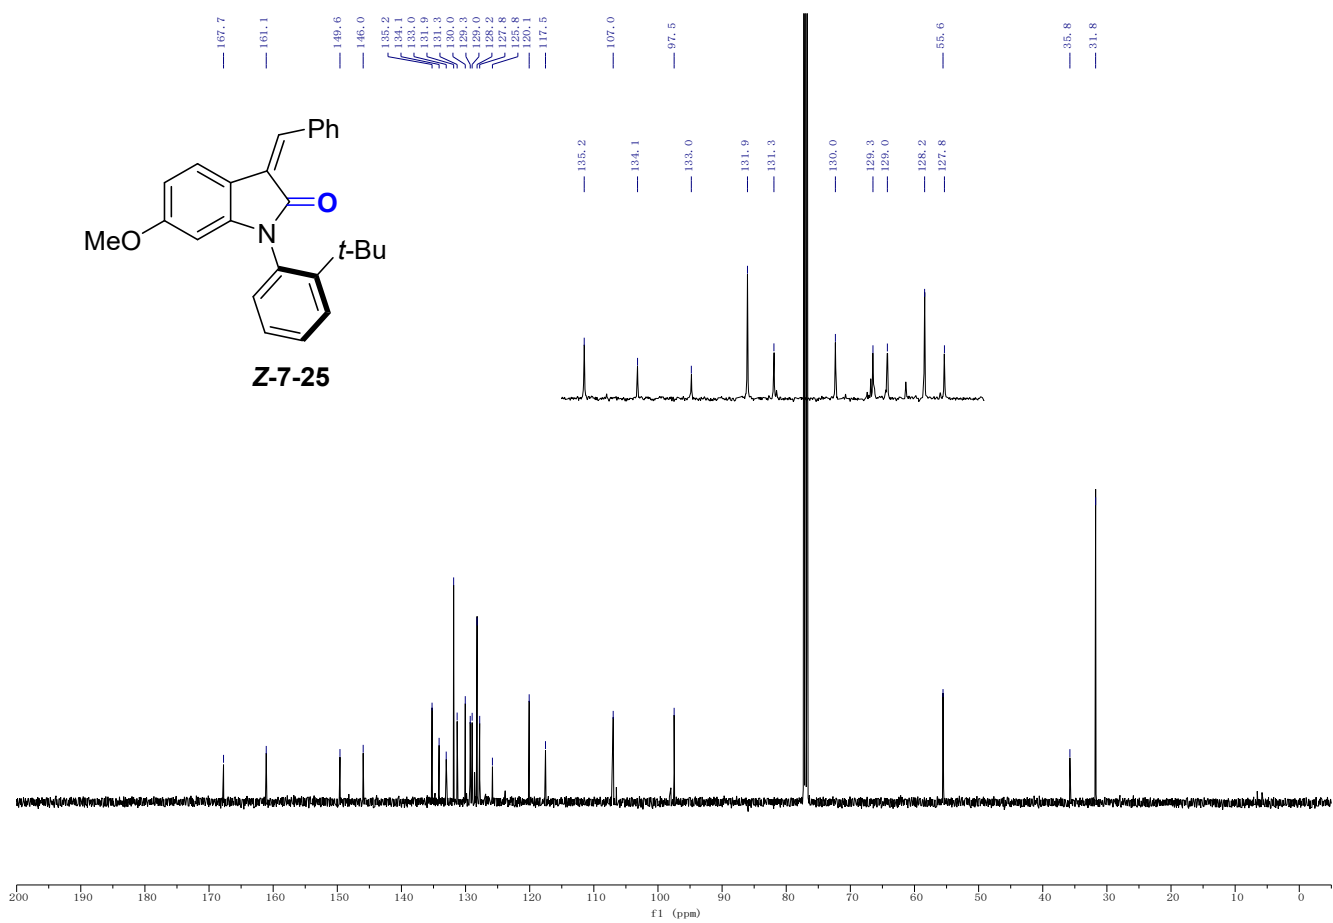

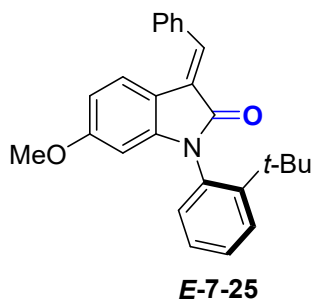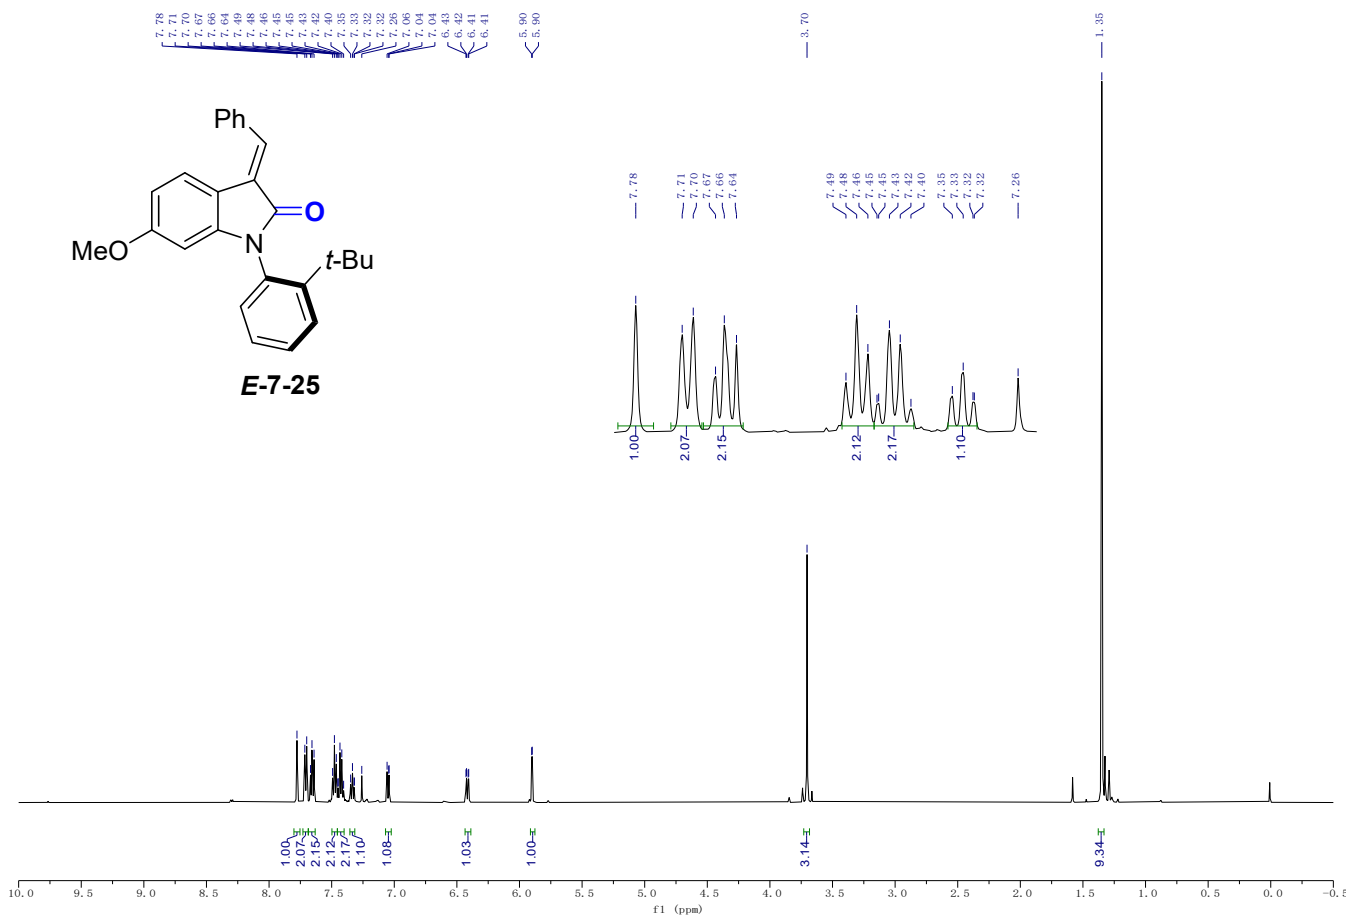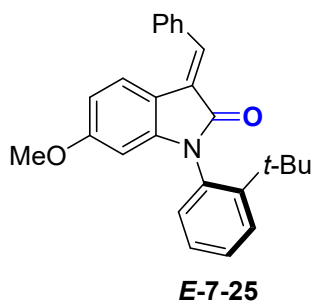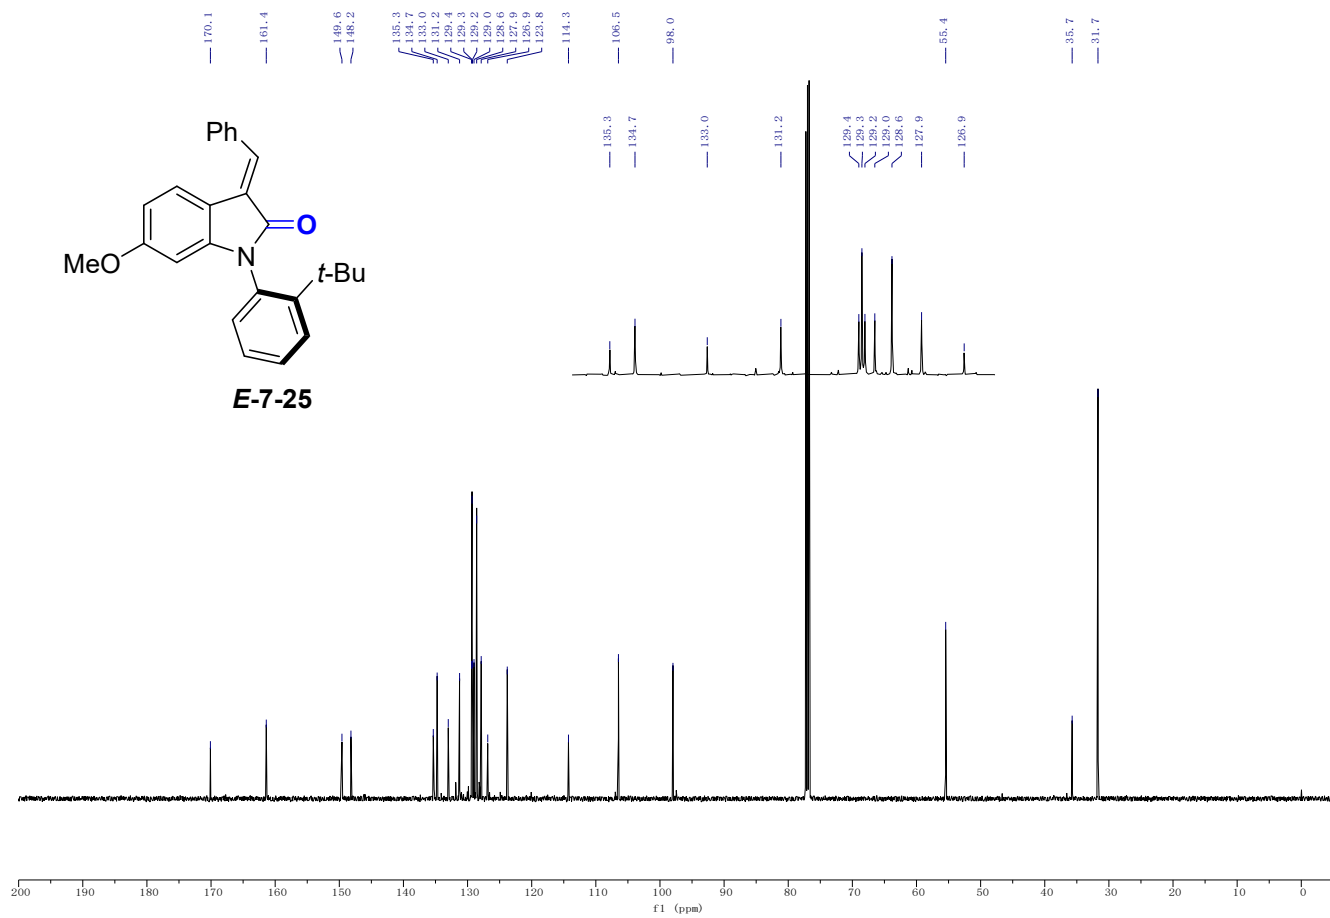

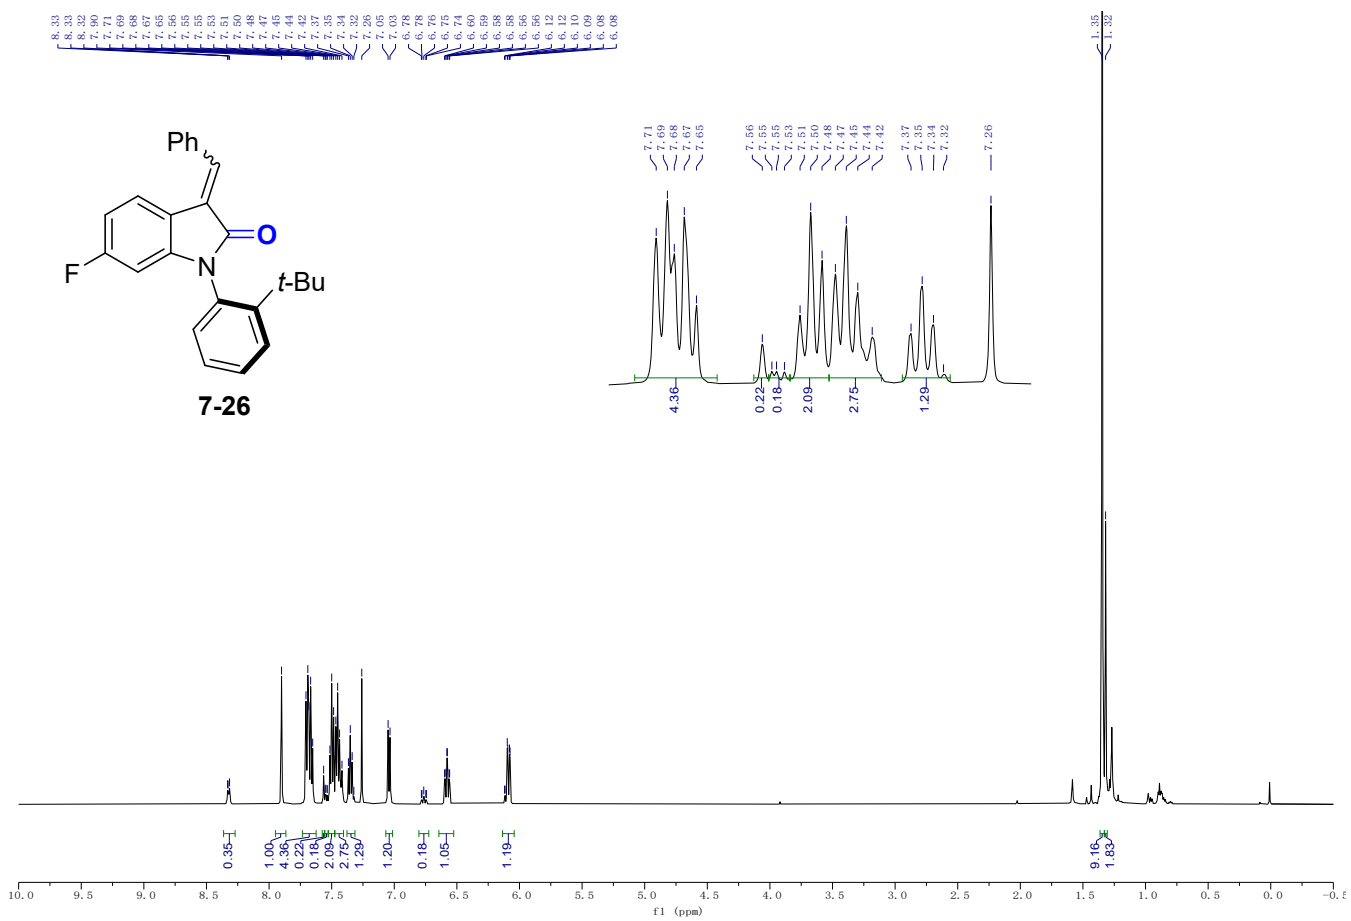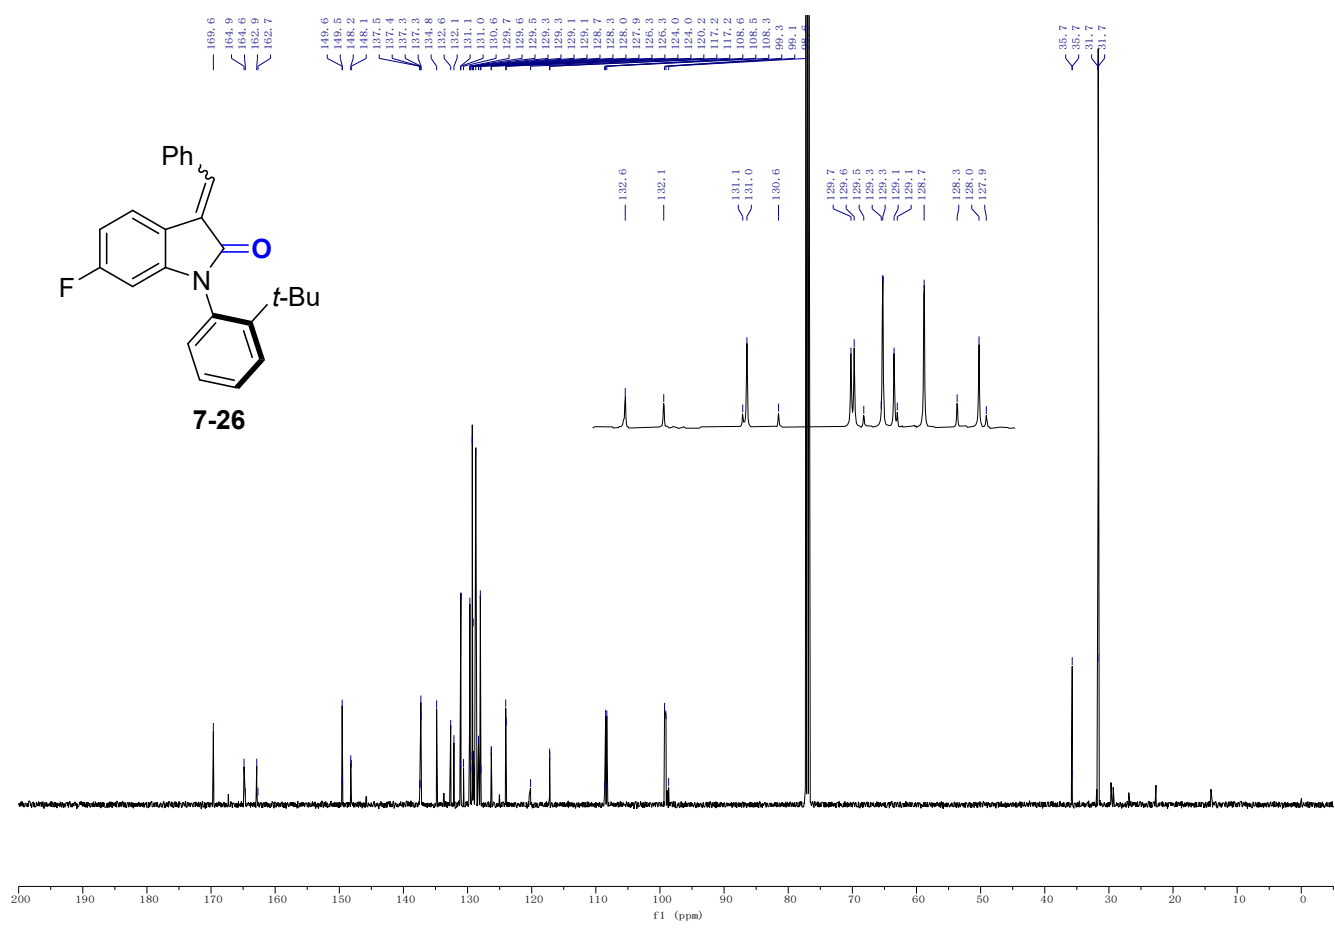

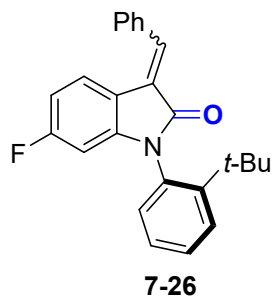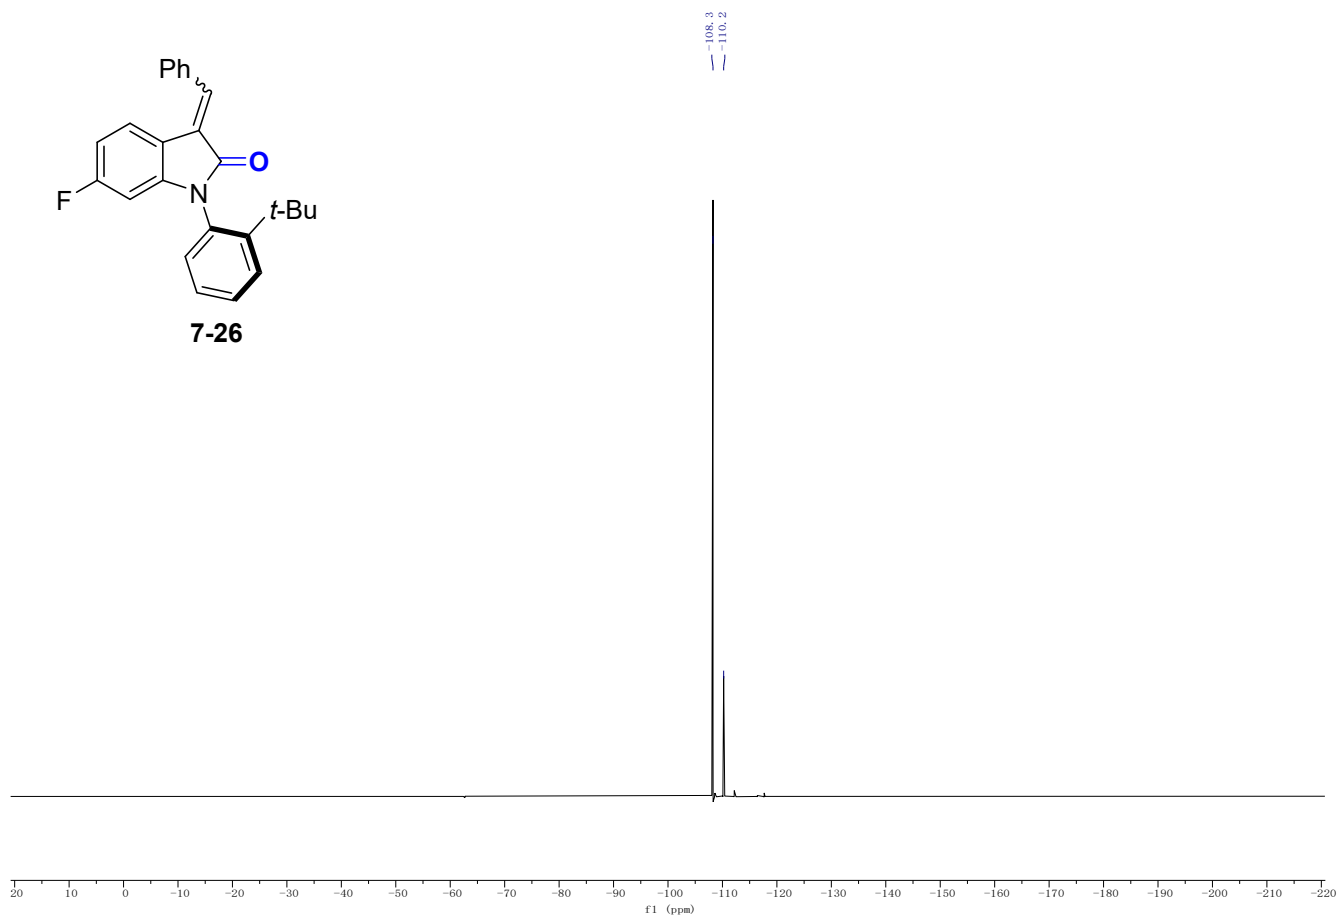

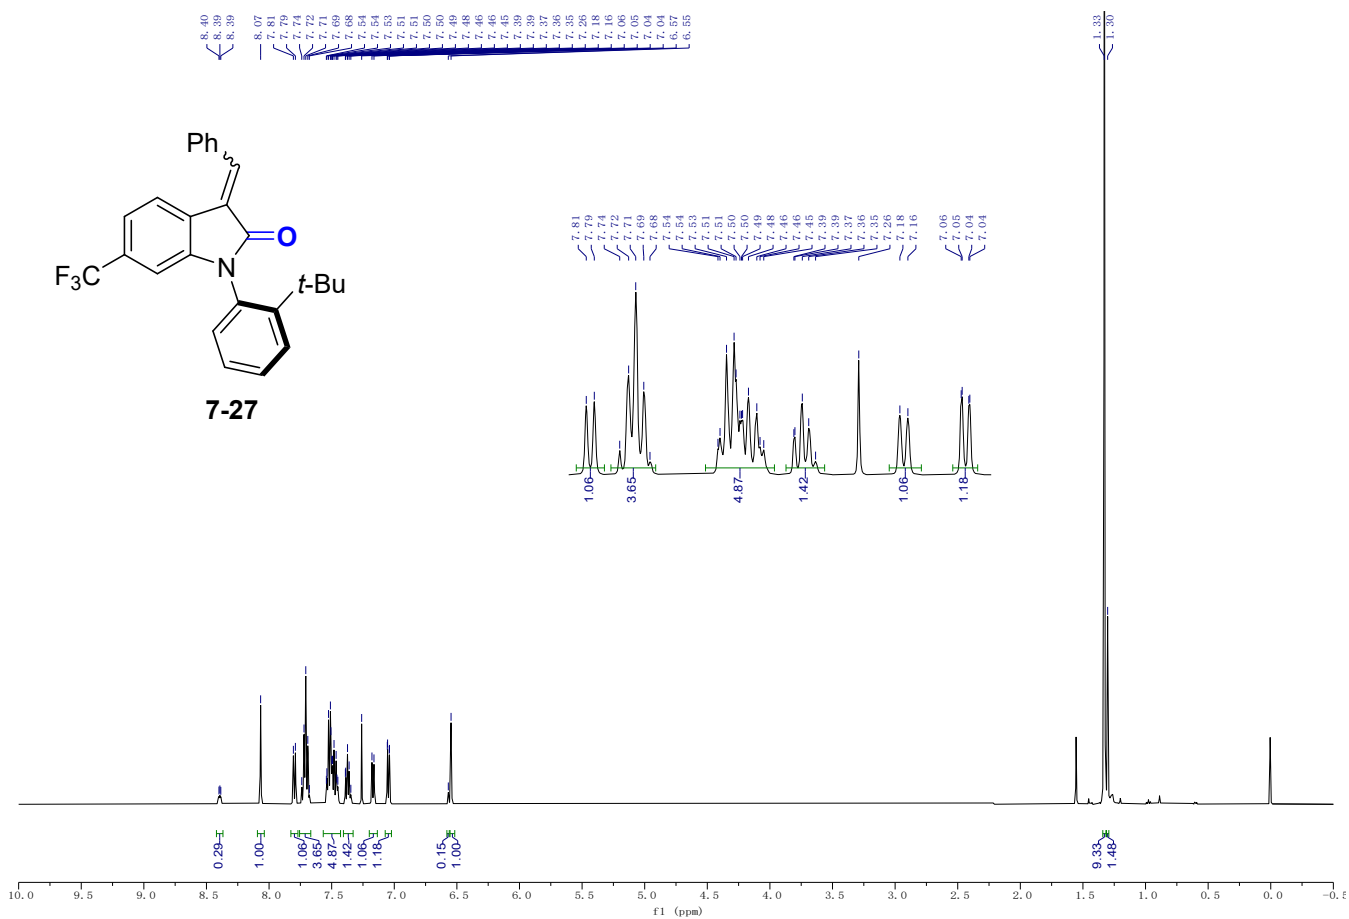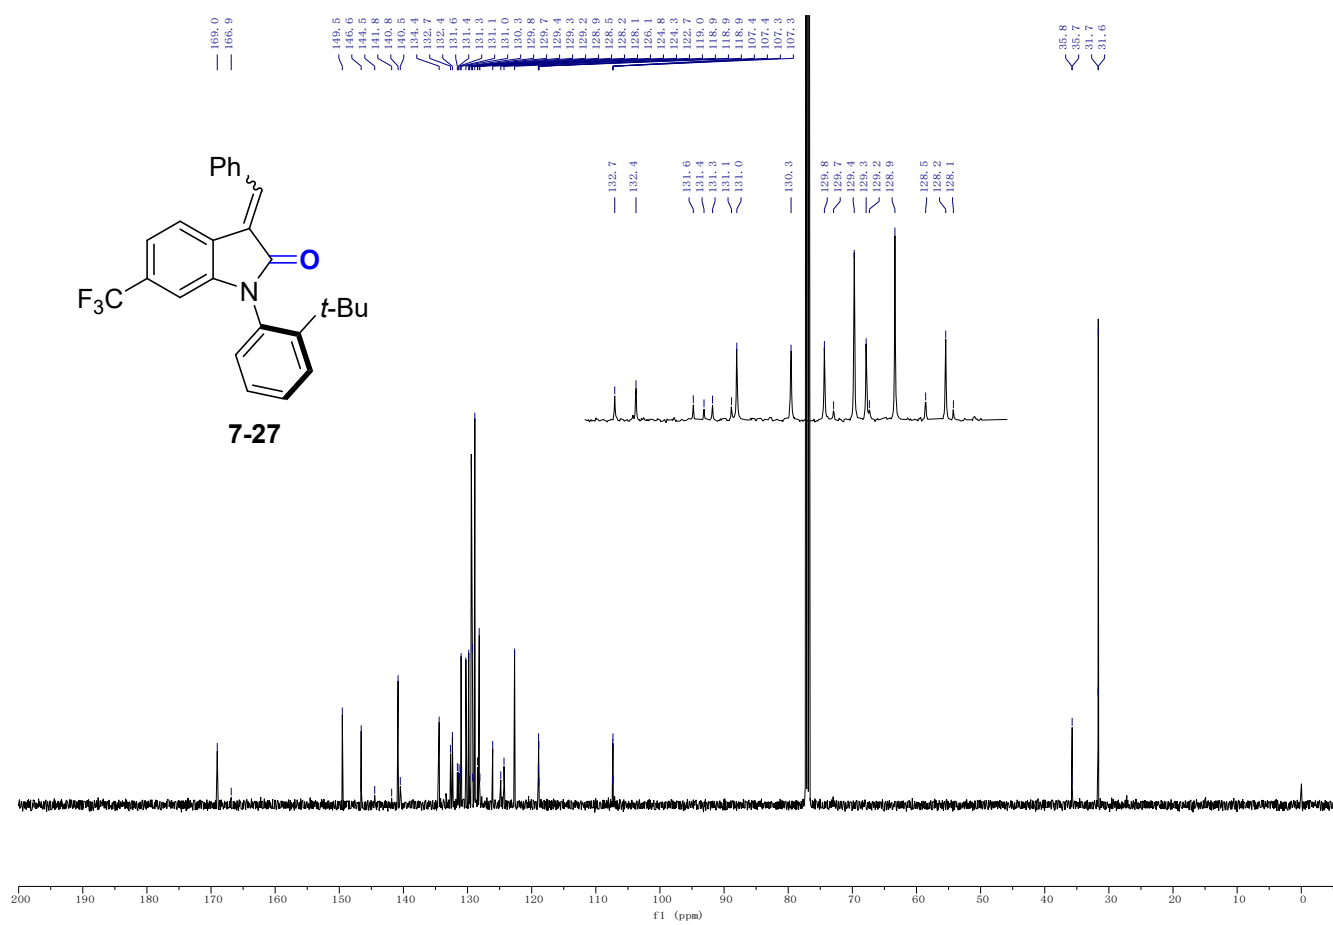

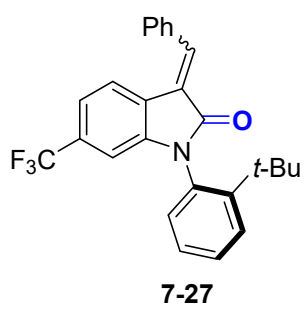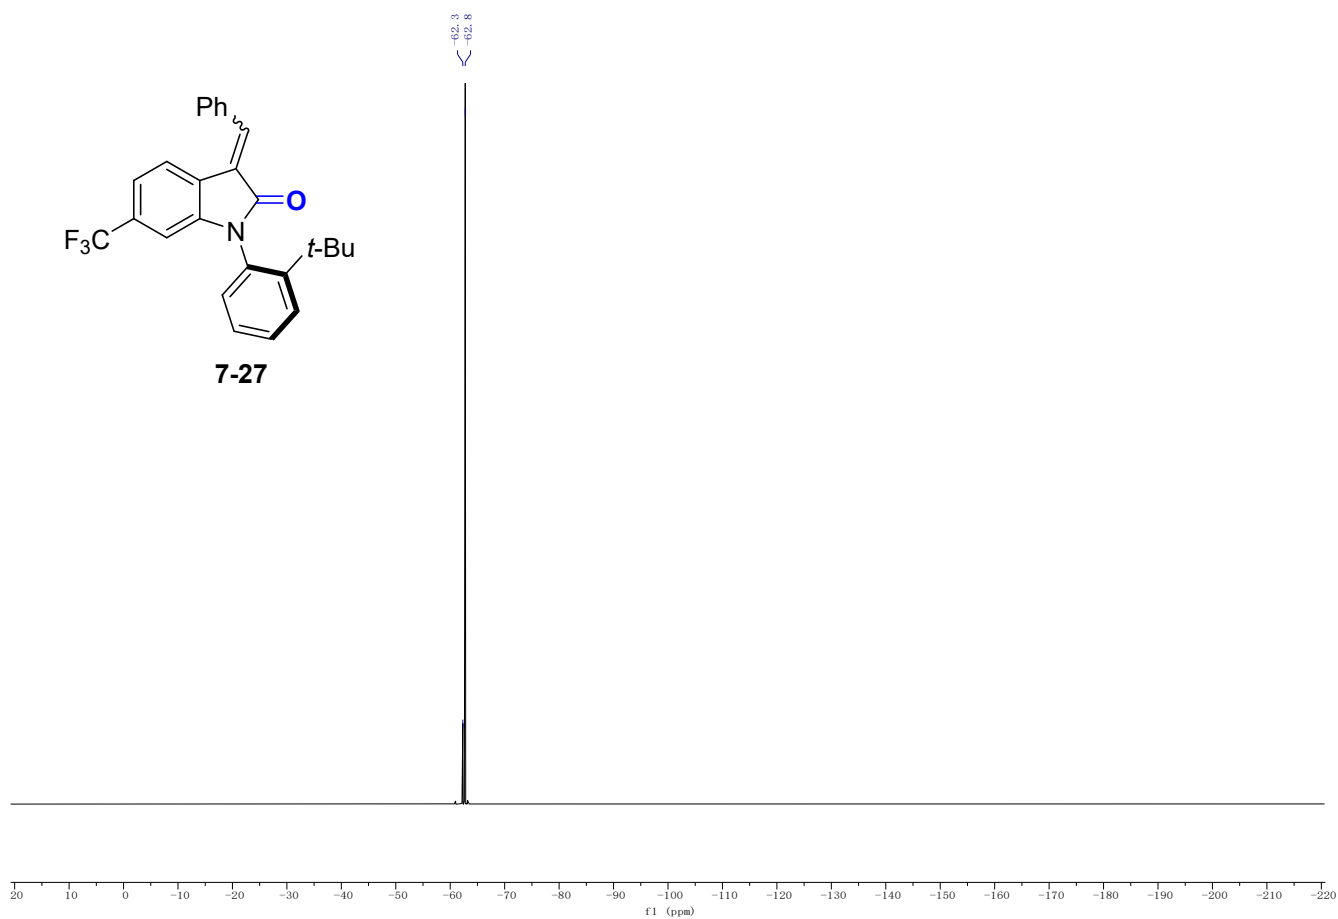

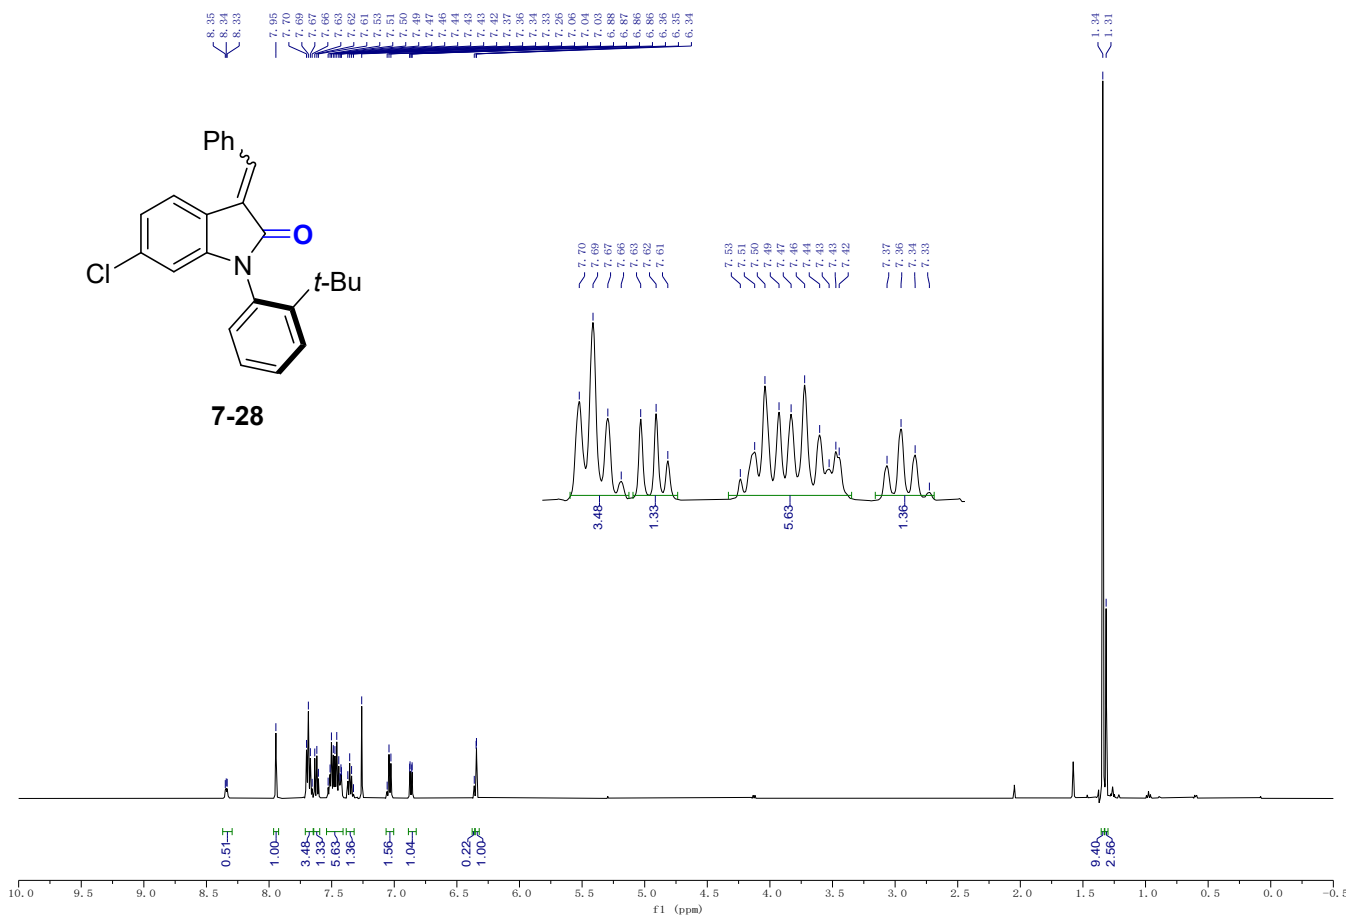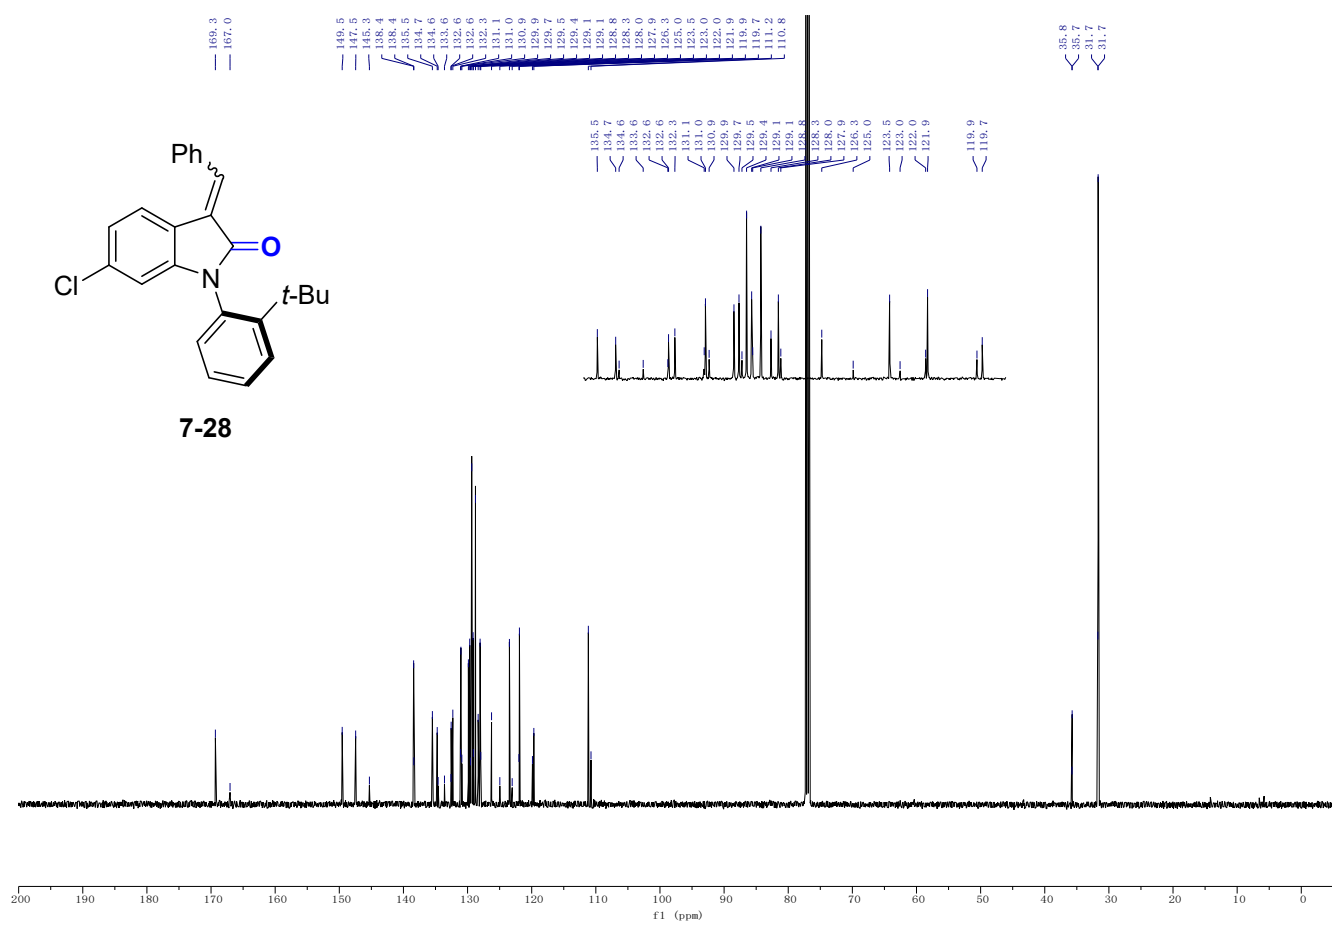



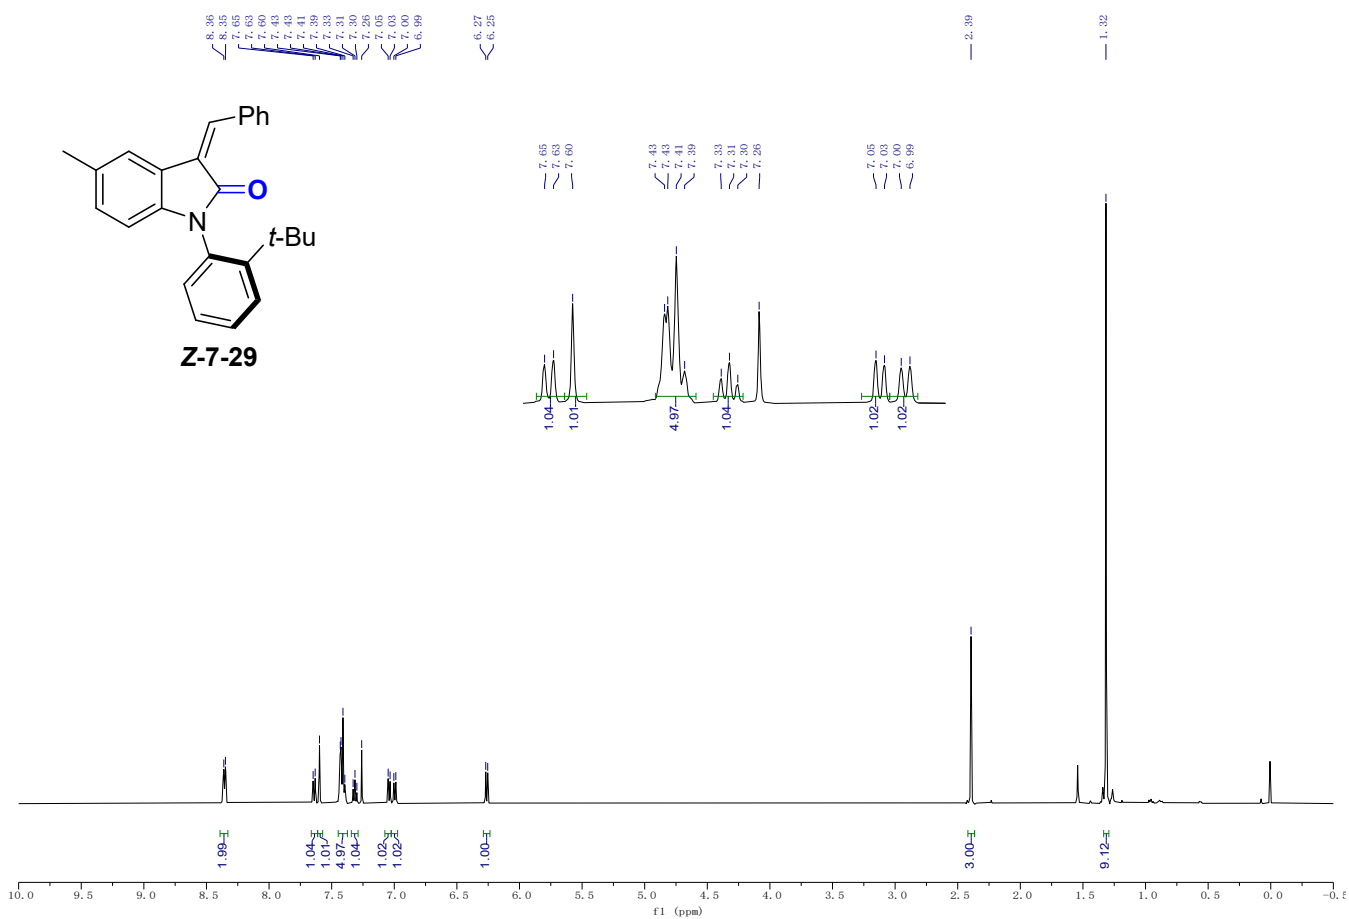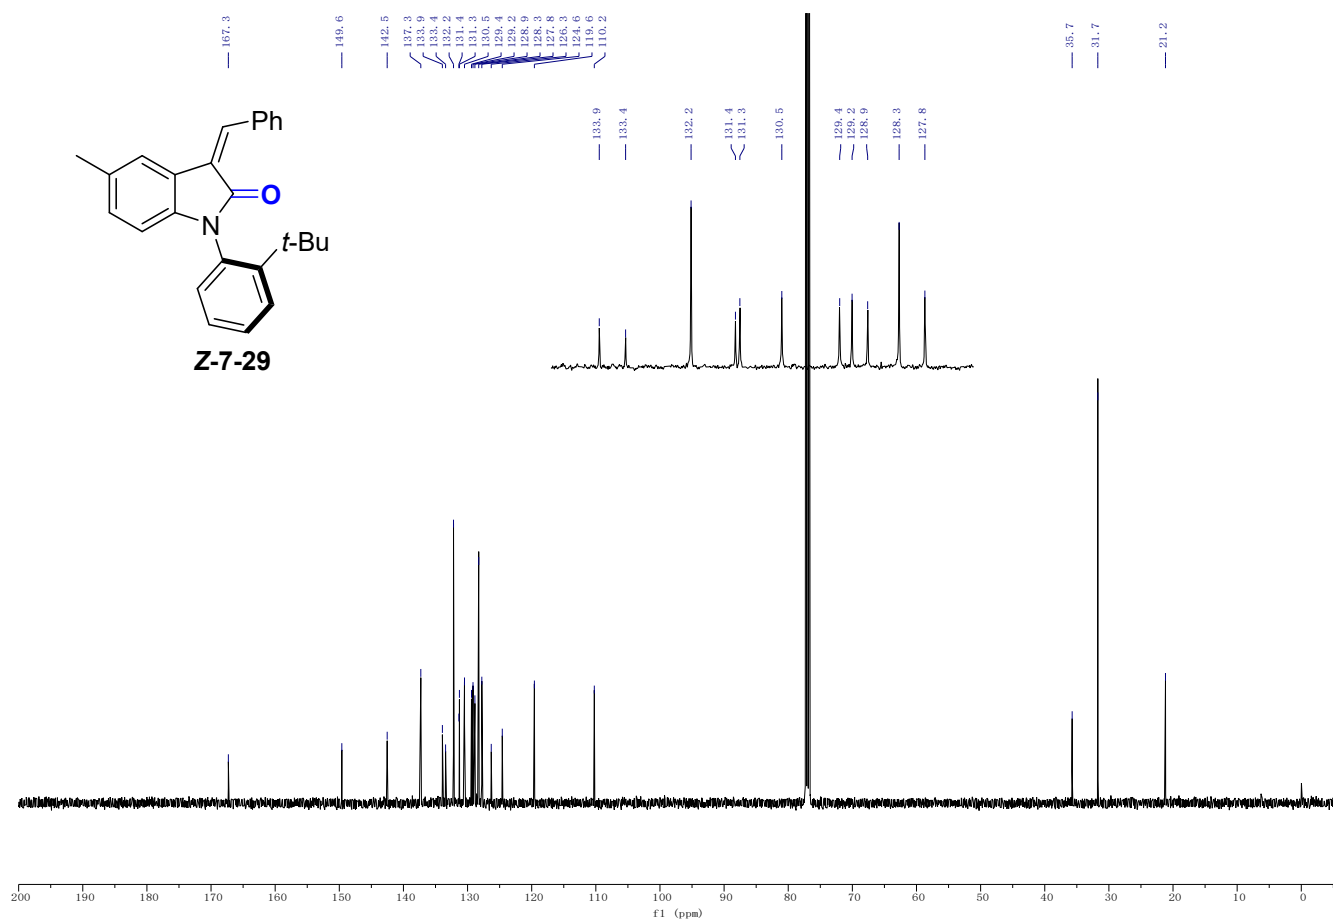

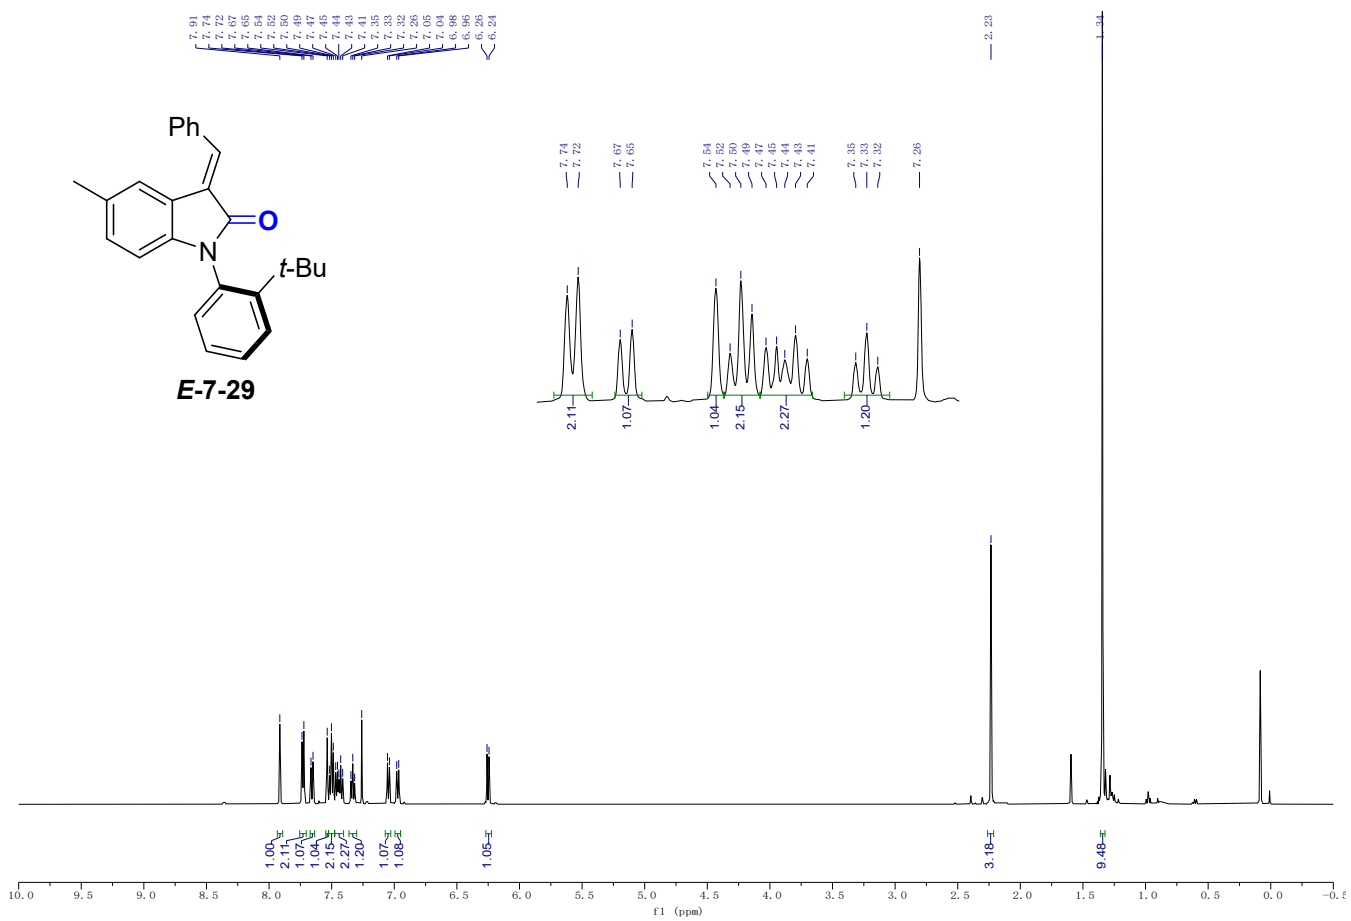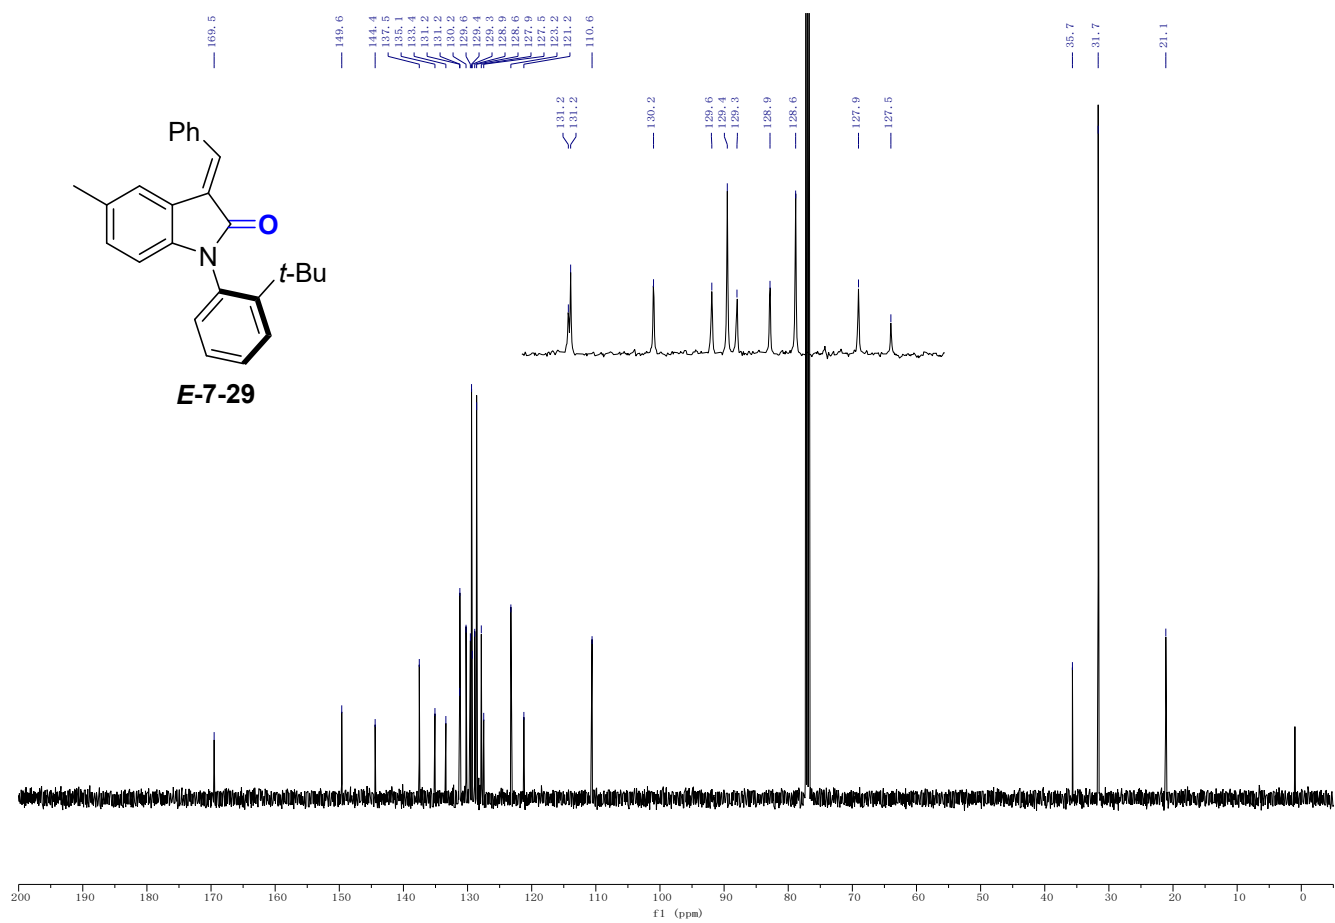

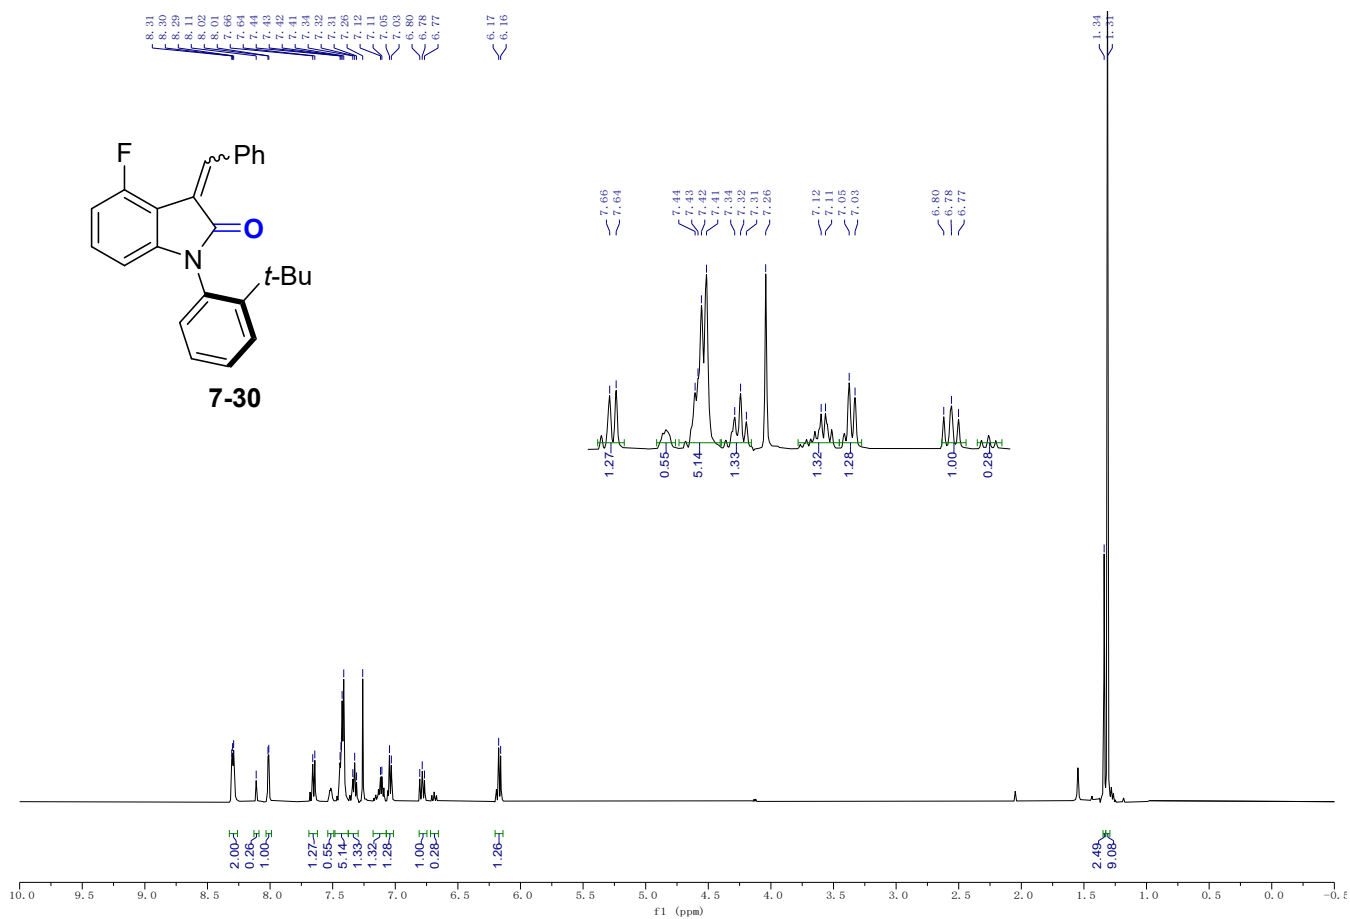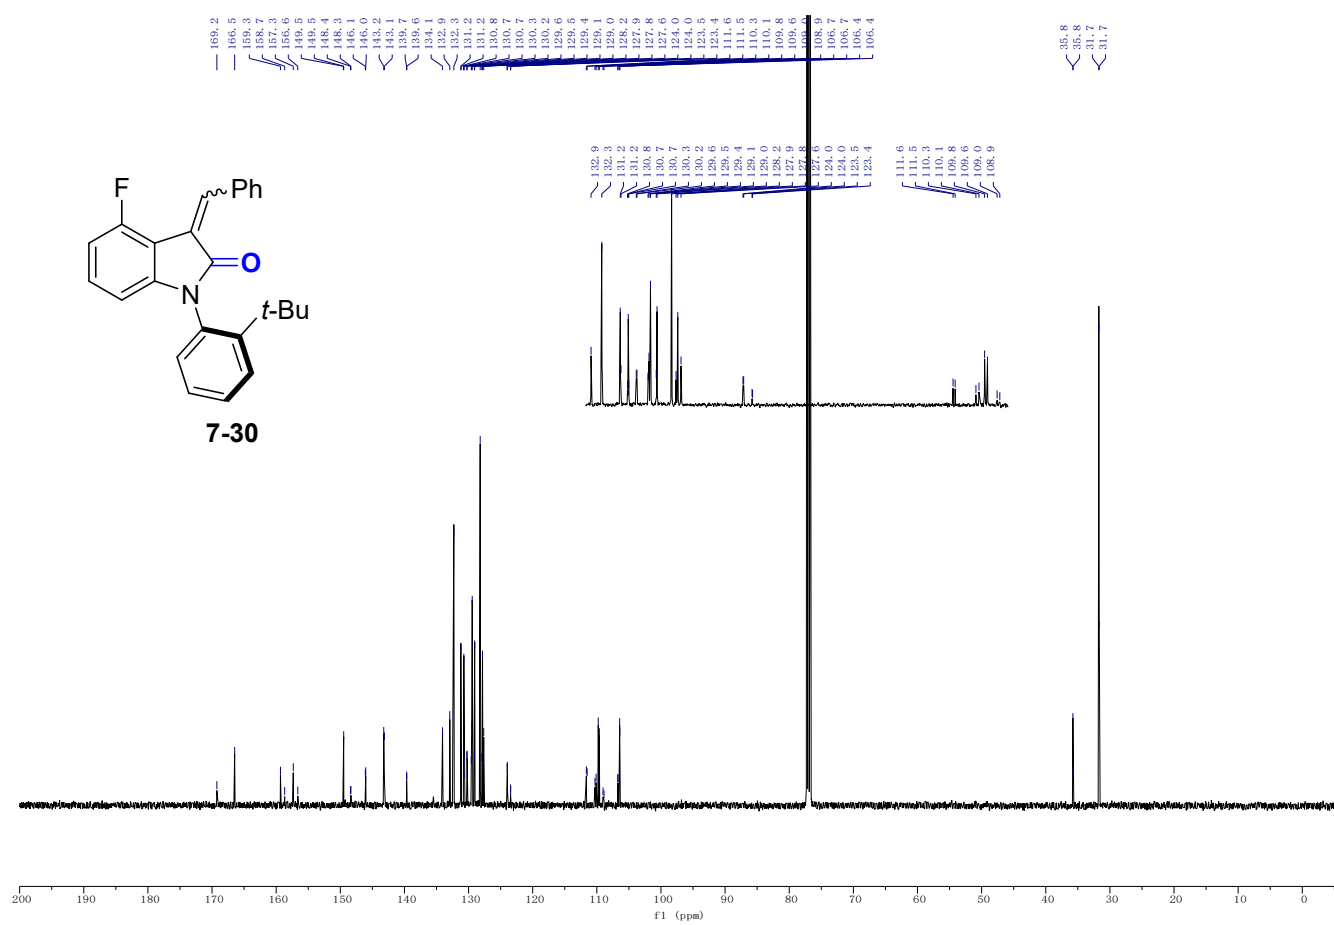

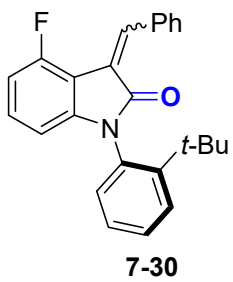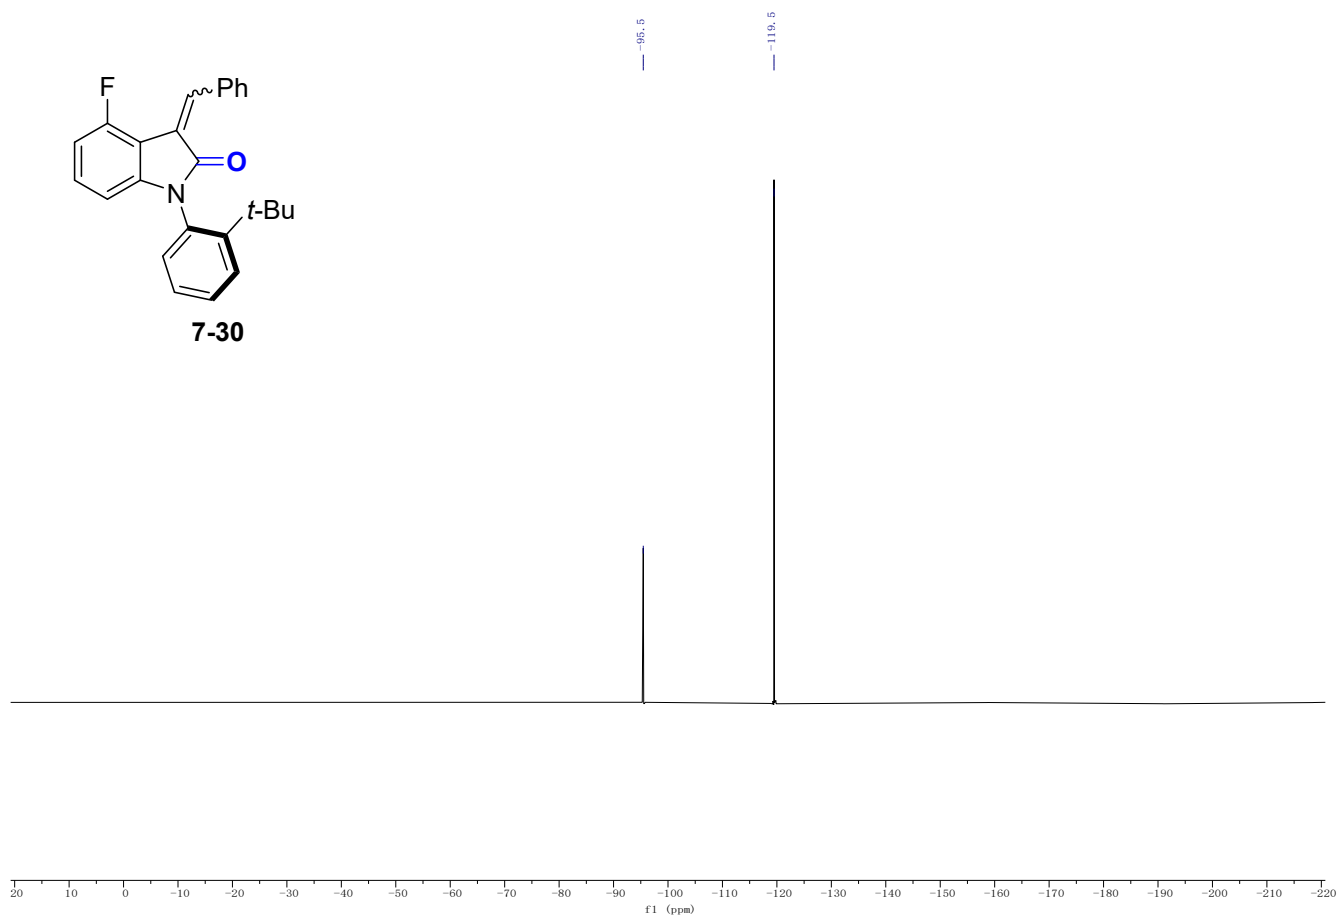

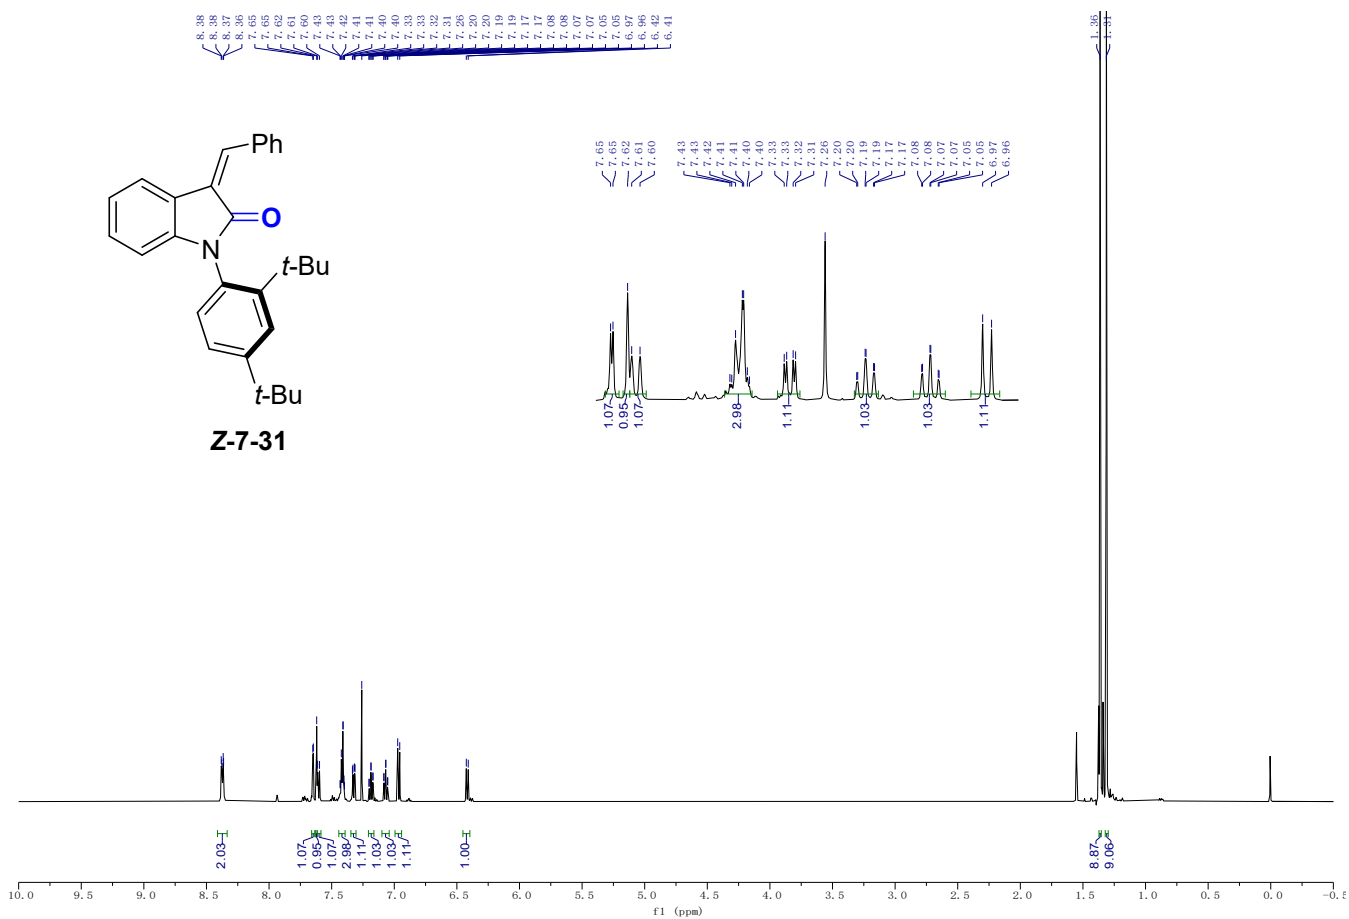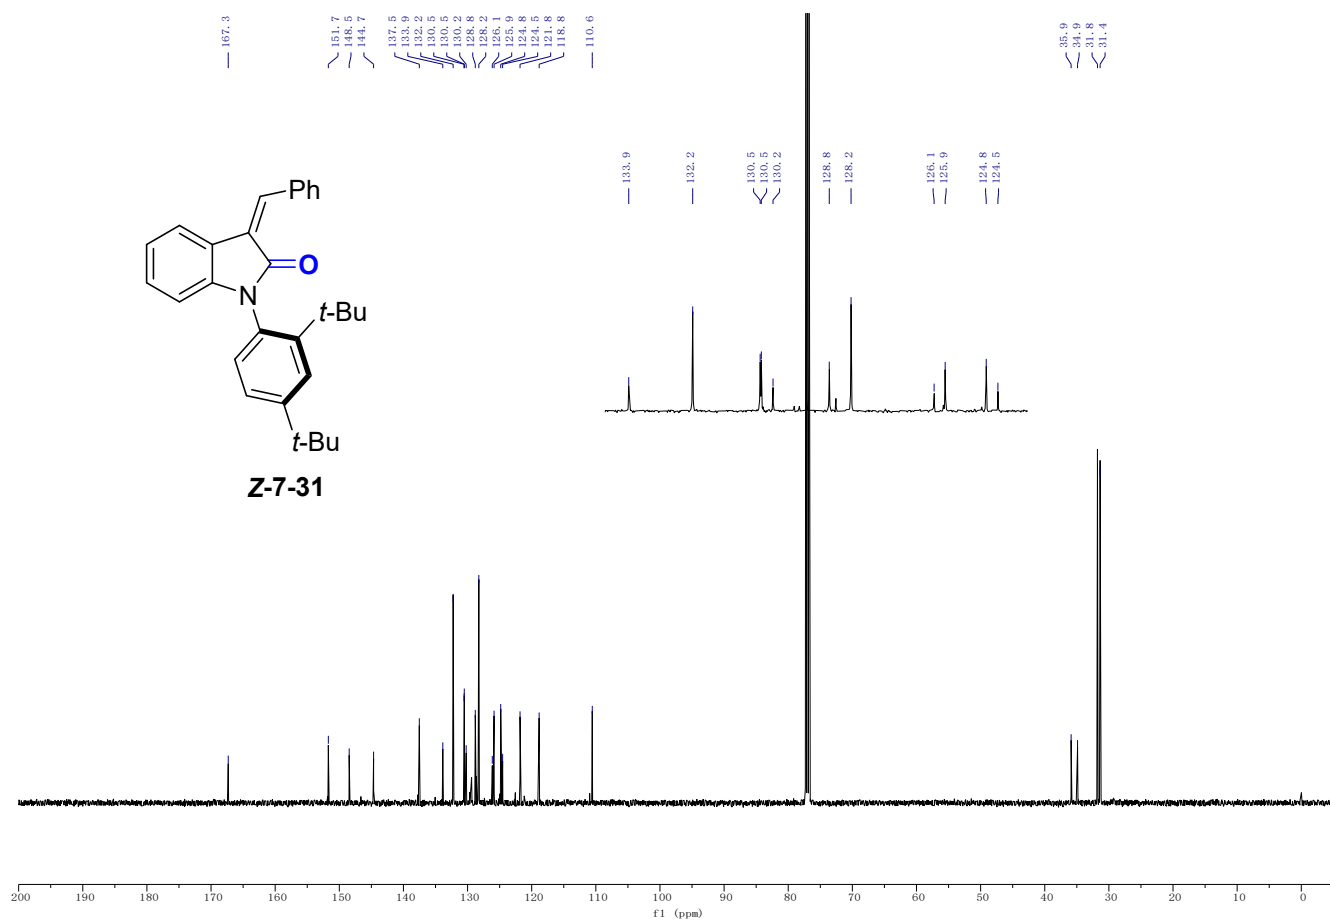

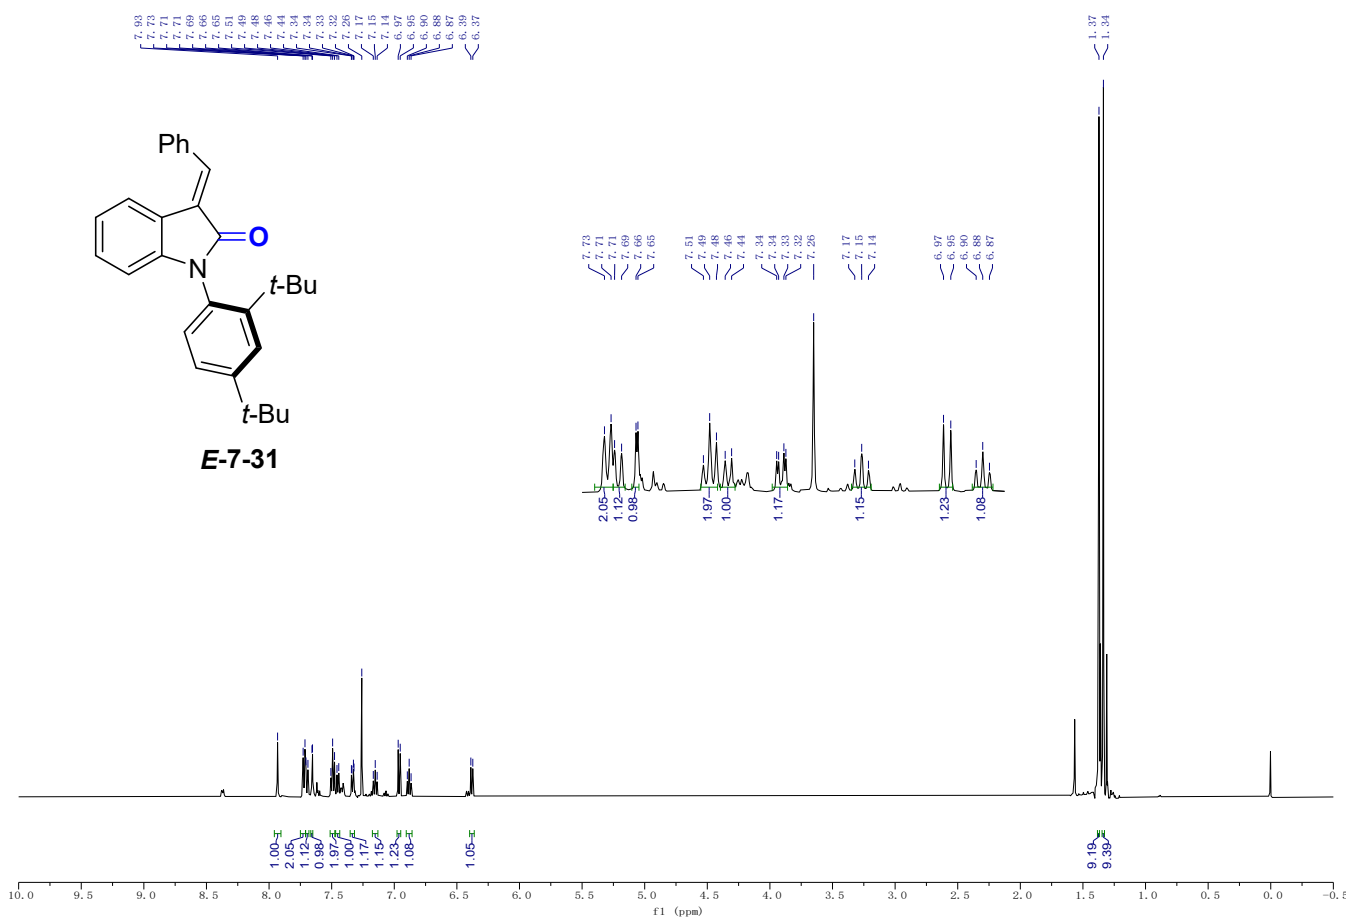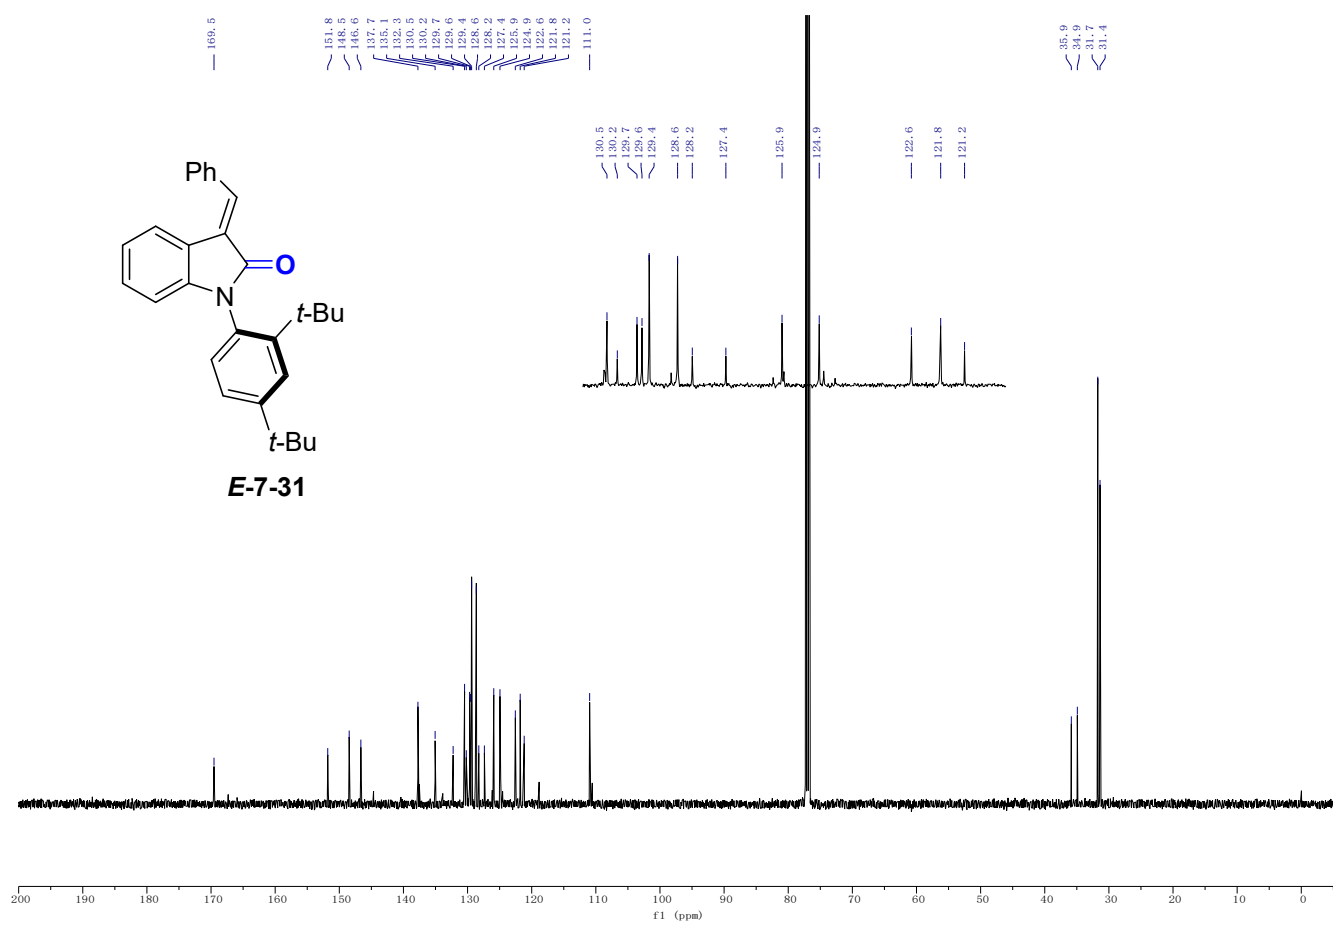

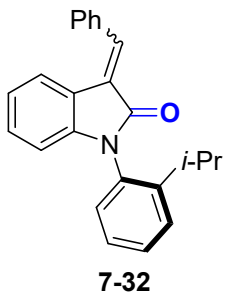

8.37  
 8.26  
 7.95  
 7.52  
 7.48  
 7.42  
 7.34  
 7.14  
 7.07  
 6.92  
 6.89  
 6.44  
 6.43  
 2.97  
 2.95  
 2.94  
 2.93  
 2.91  
 1.27  
 1.25  
 1.22  
 1.21  
 1.15  
 1.13

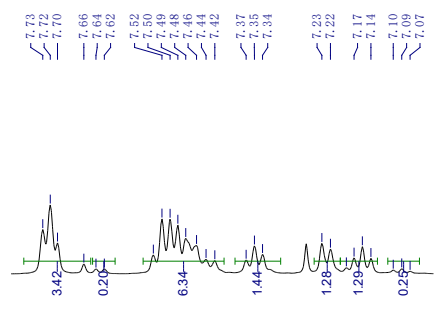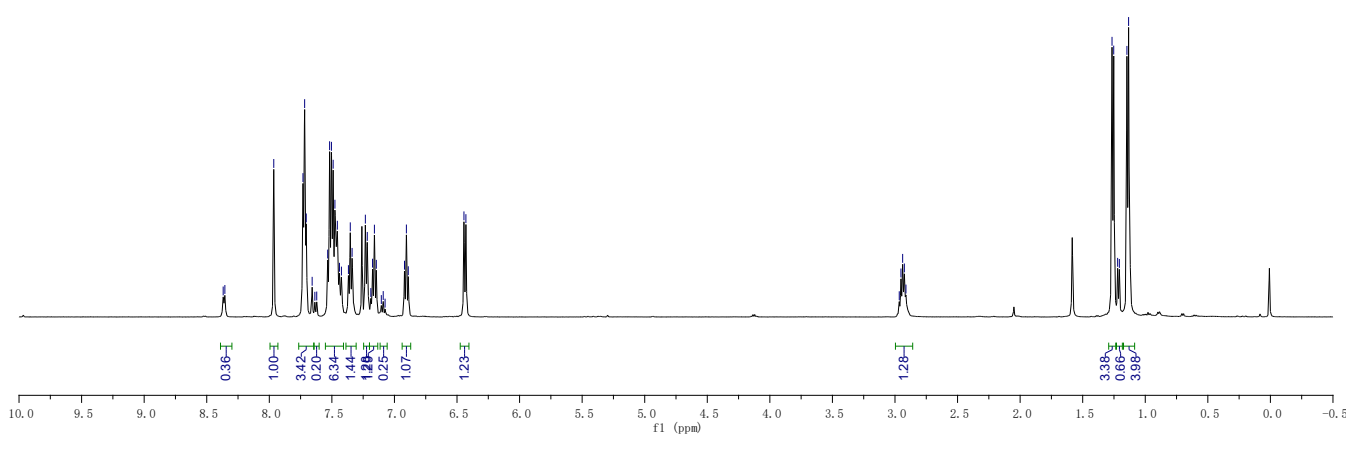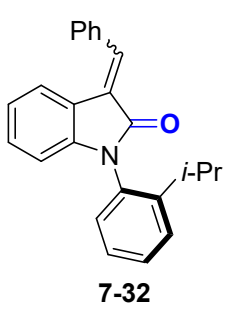

168.3  
 165.0  
 147.7  
 143.5  
 137.9  
 137.7  
 129.6  
 129.3  
 129.3  
 128.9  
 128.8  
 127.3  
 127.1  
 126.9  
 124.4  
 122.0  
 119.0  
 109.5  
 109.2  
 132.3  
 132.2  
 132.2  
 130.6  
 129.3  
 129.3  
 128.9  
 128.7  
 128.3  
 127.3  
 127.2  
 127.1  
 127.1  
 126.9  
 28.5  
 28.4  
 23.9  
 23.7  
 23.6

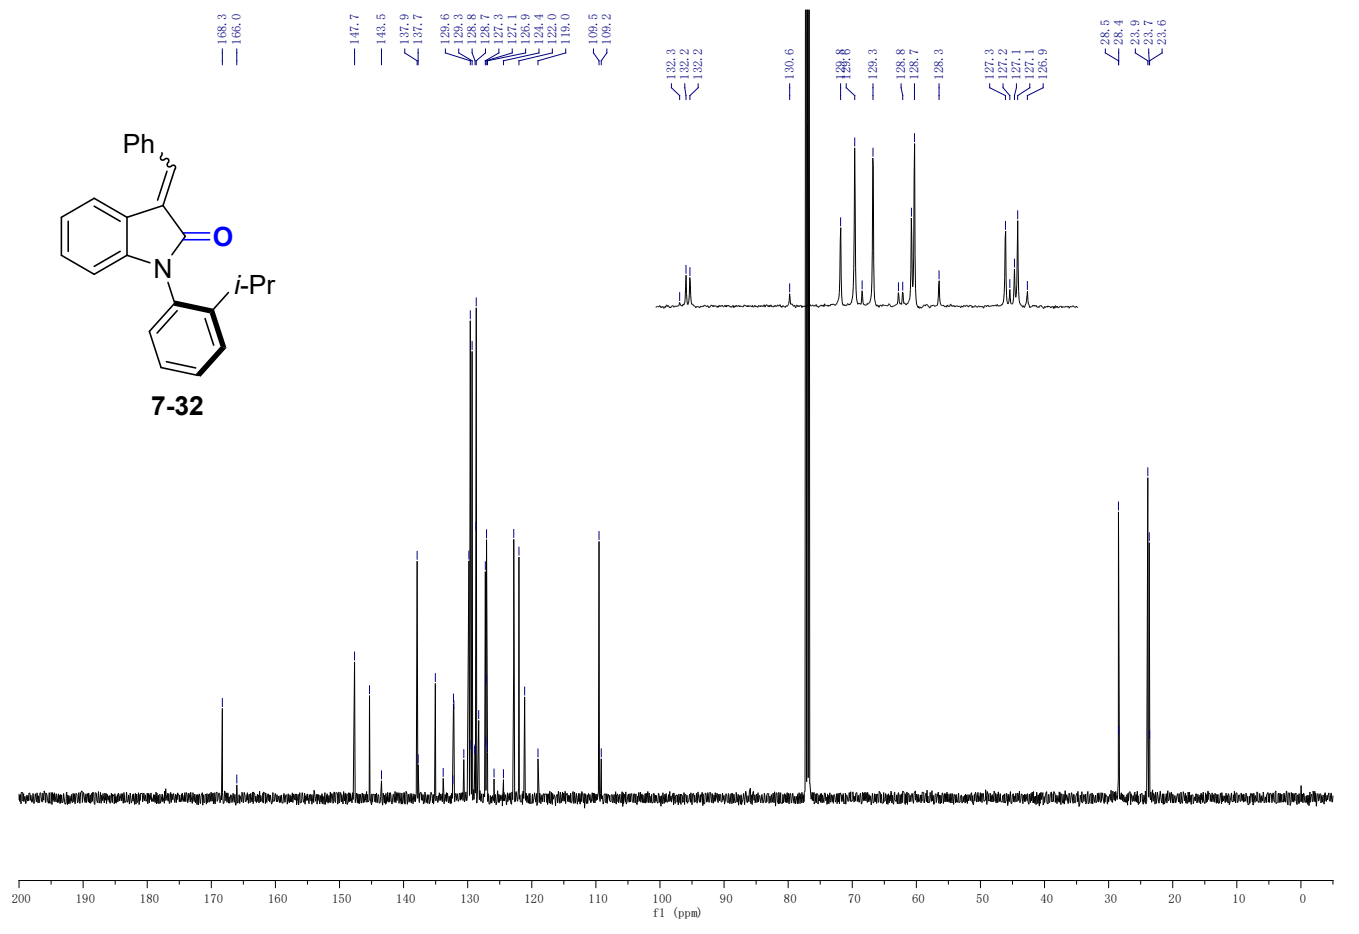

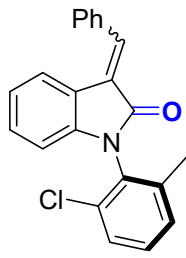

7-33

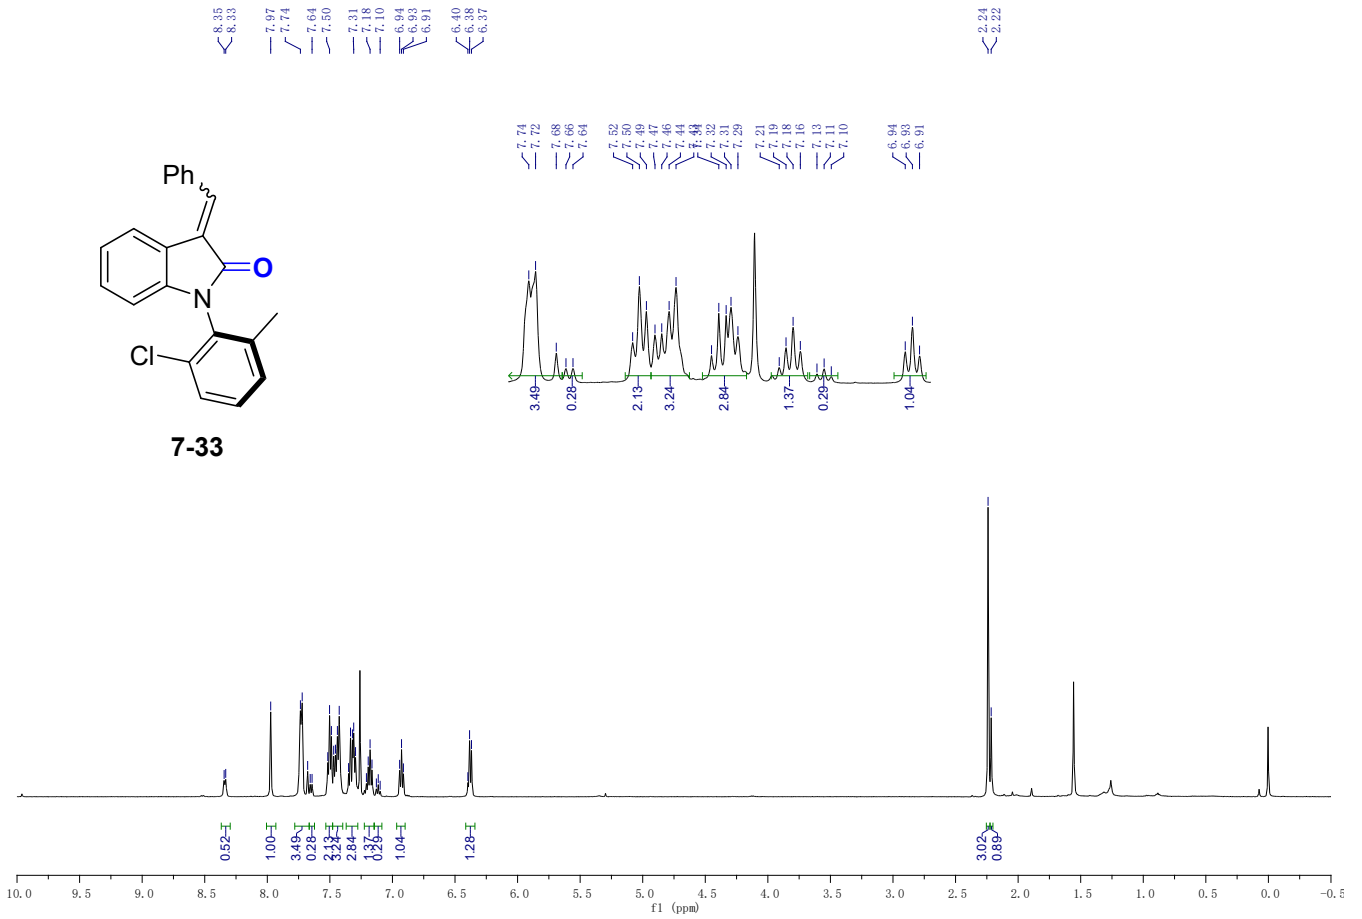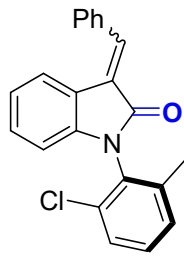

7-33

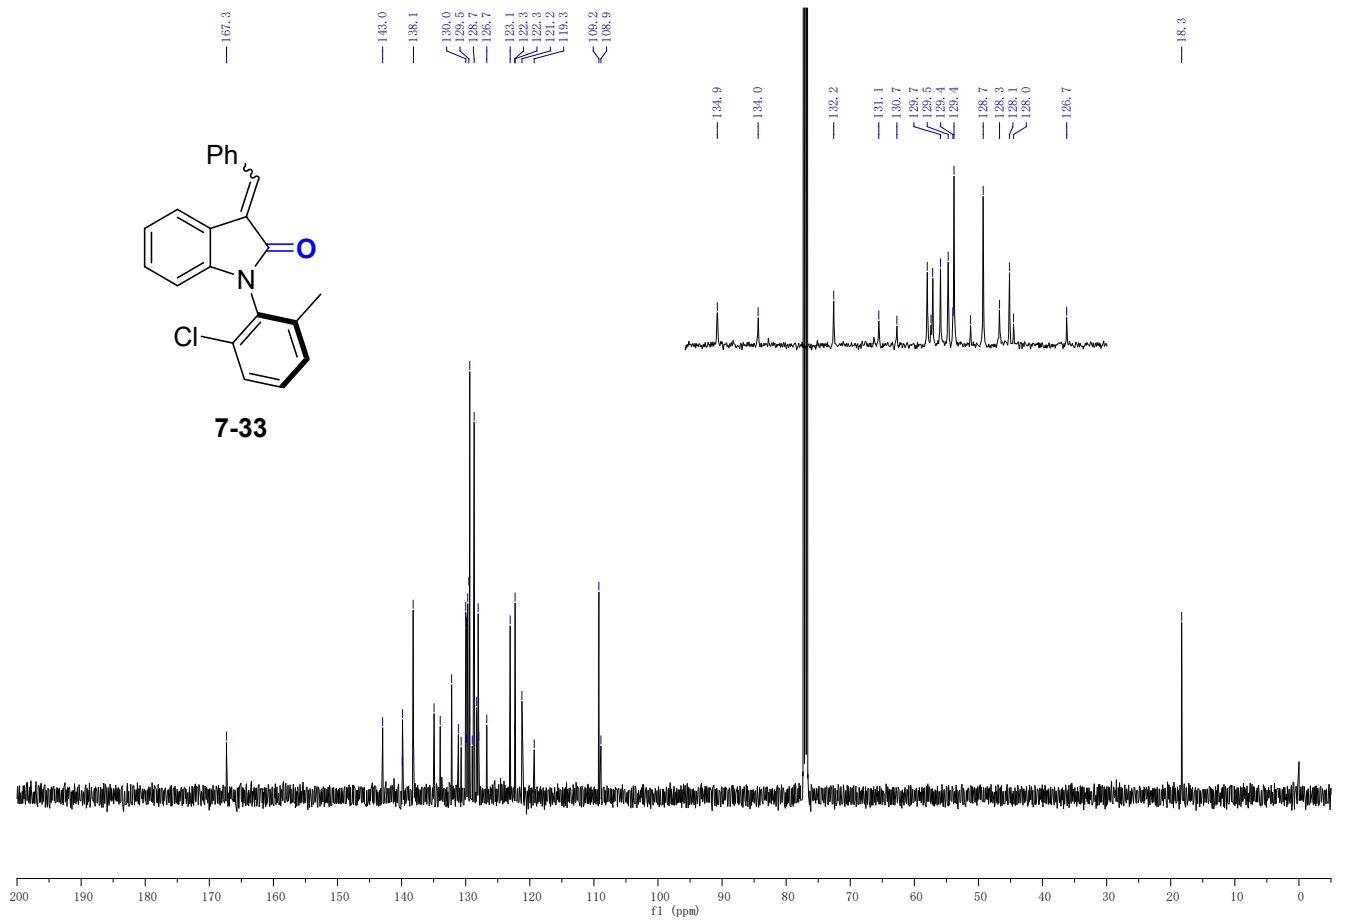



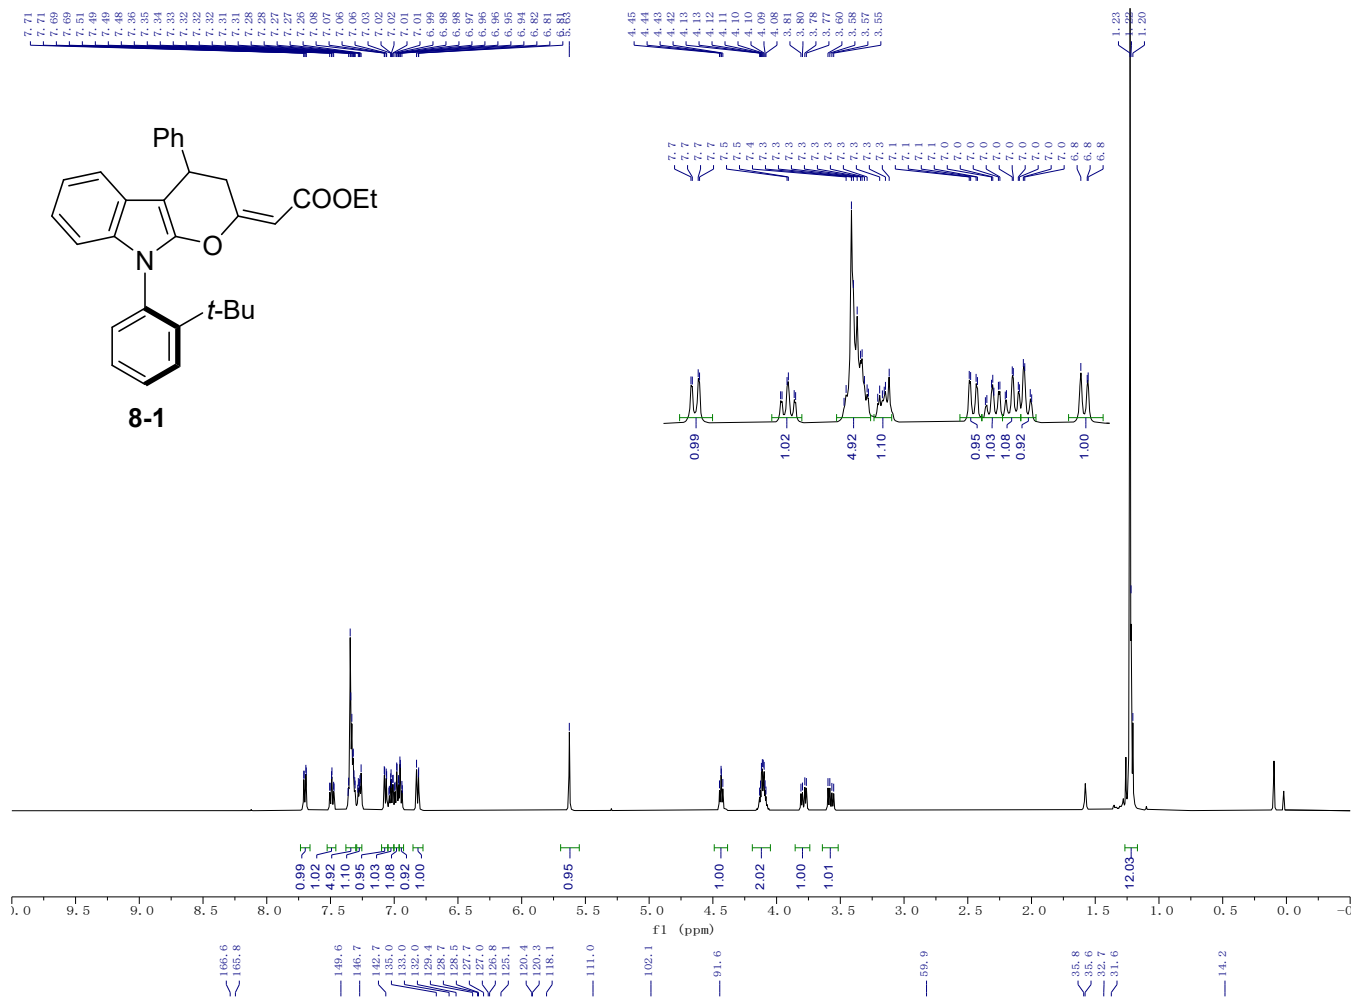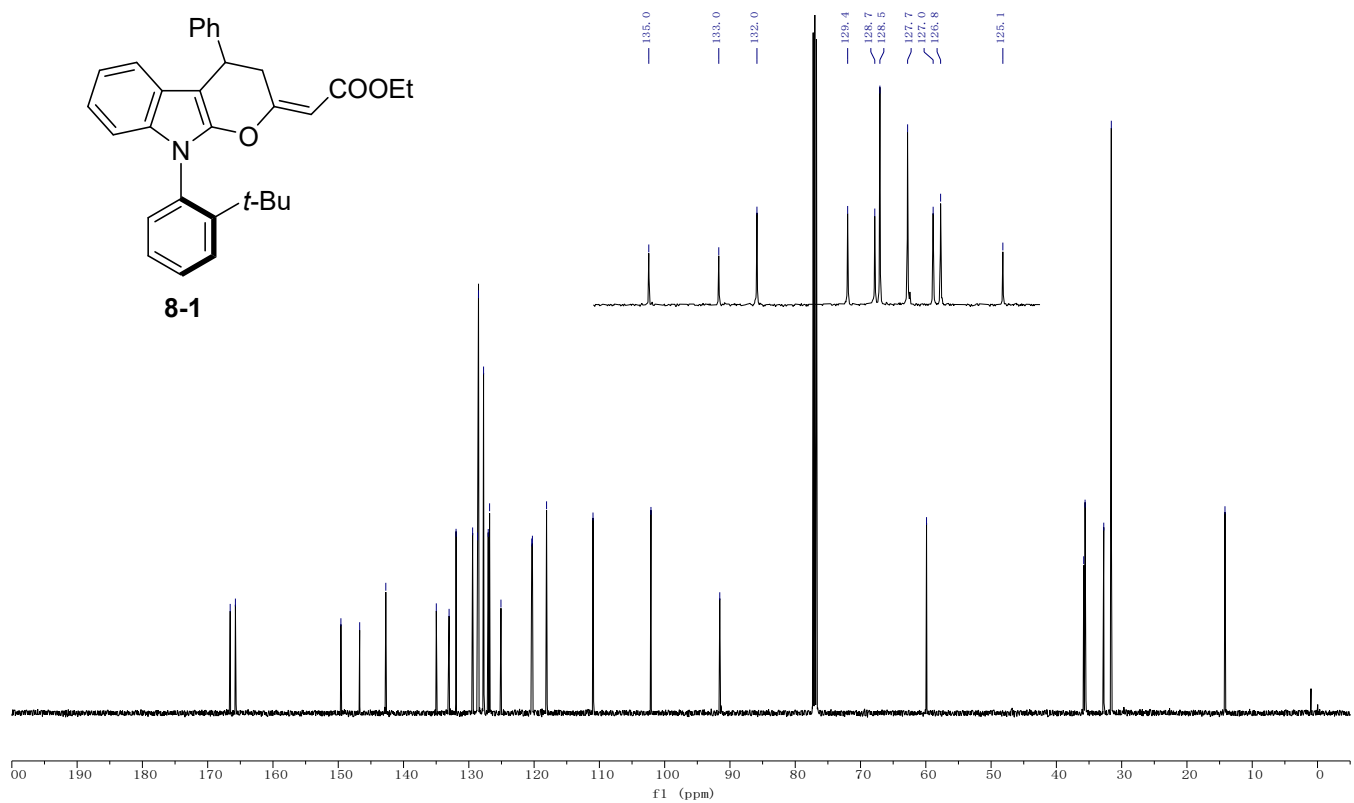

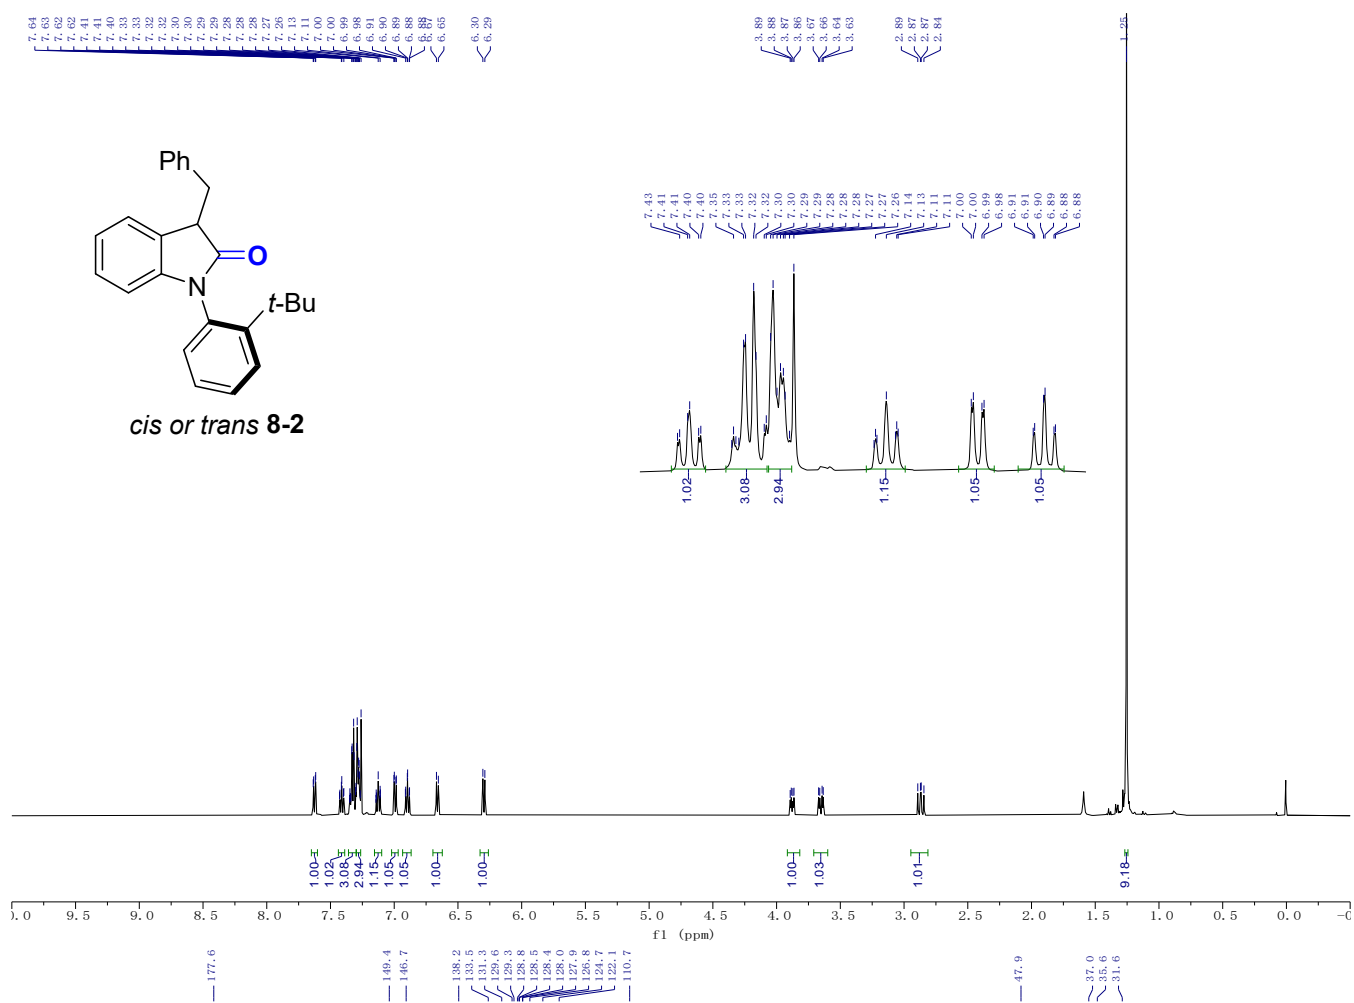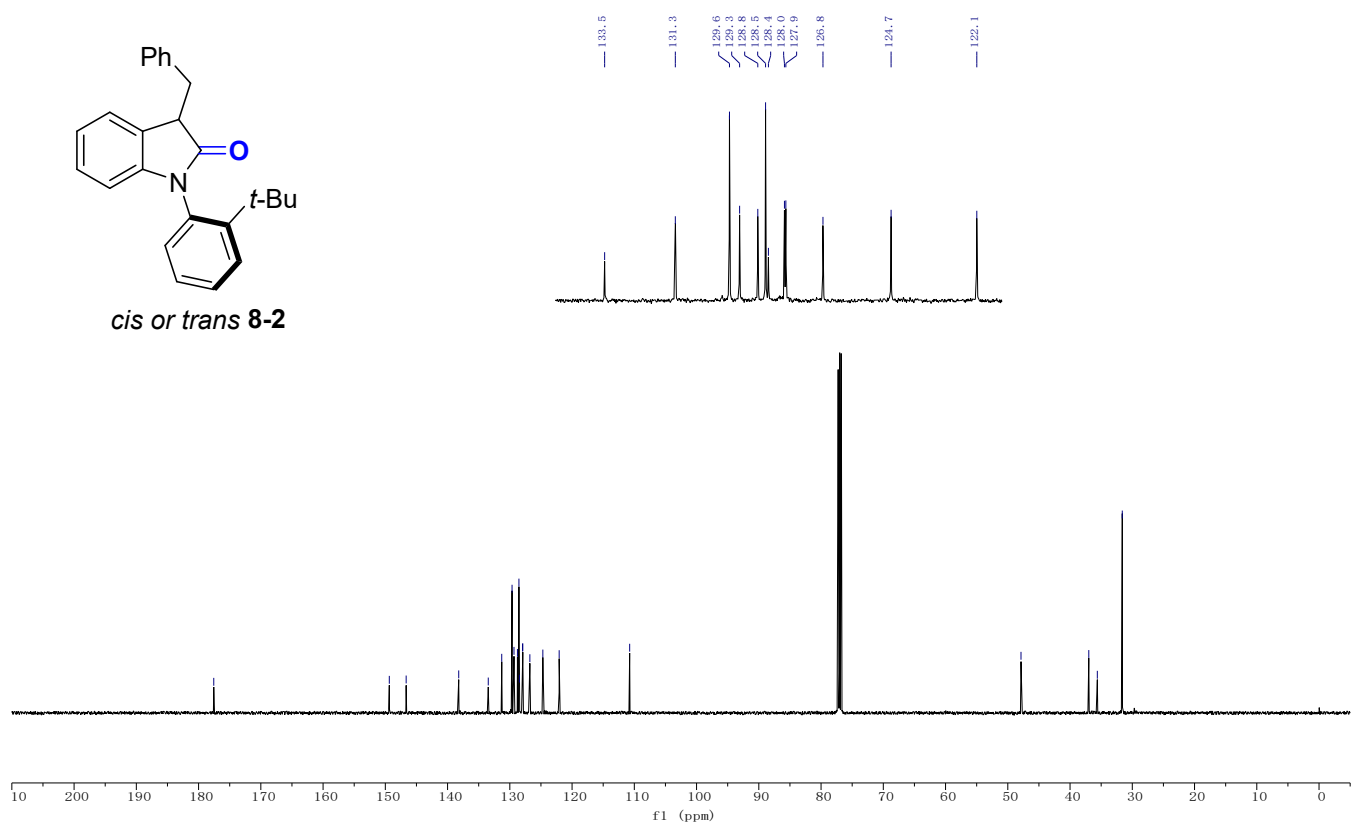

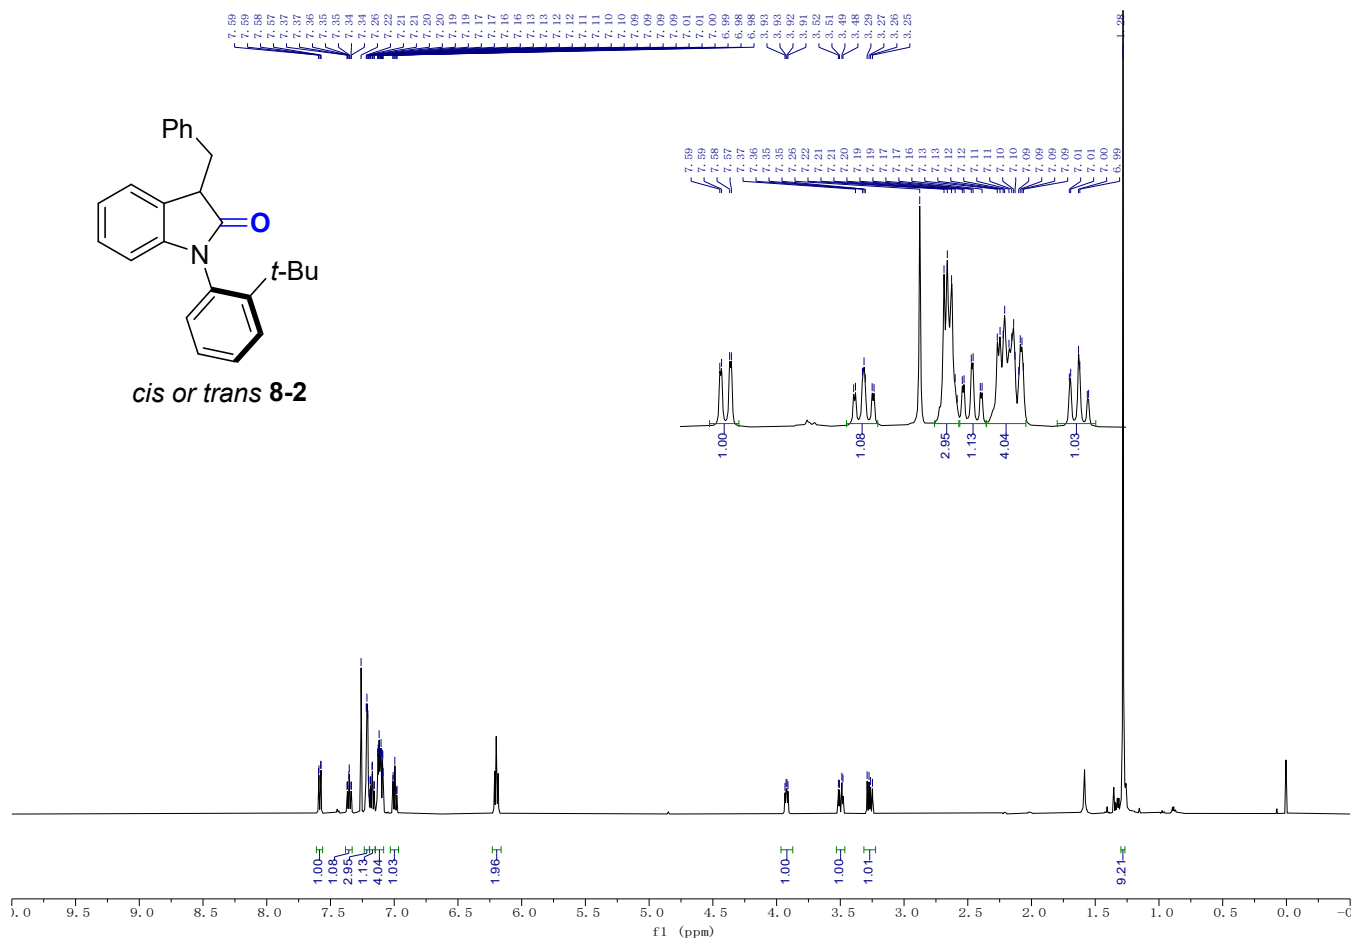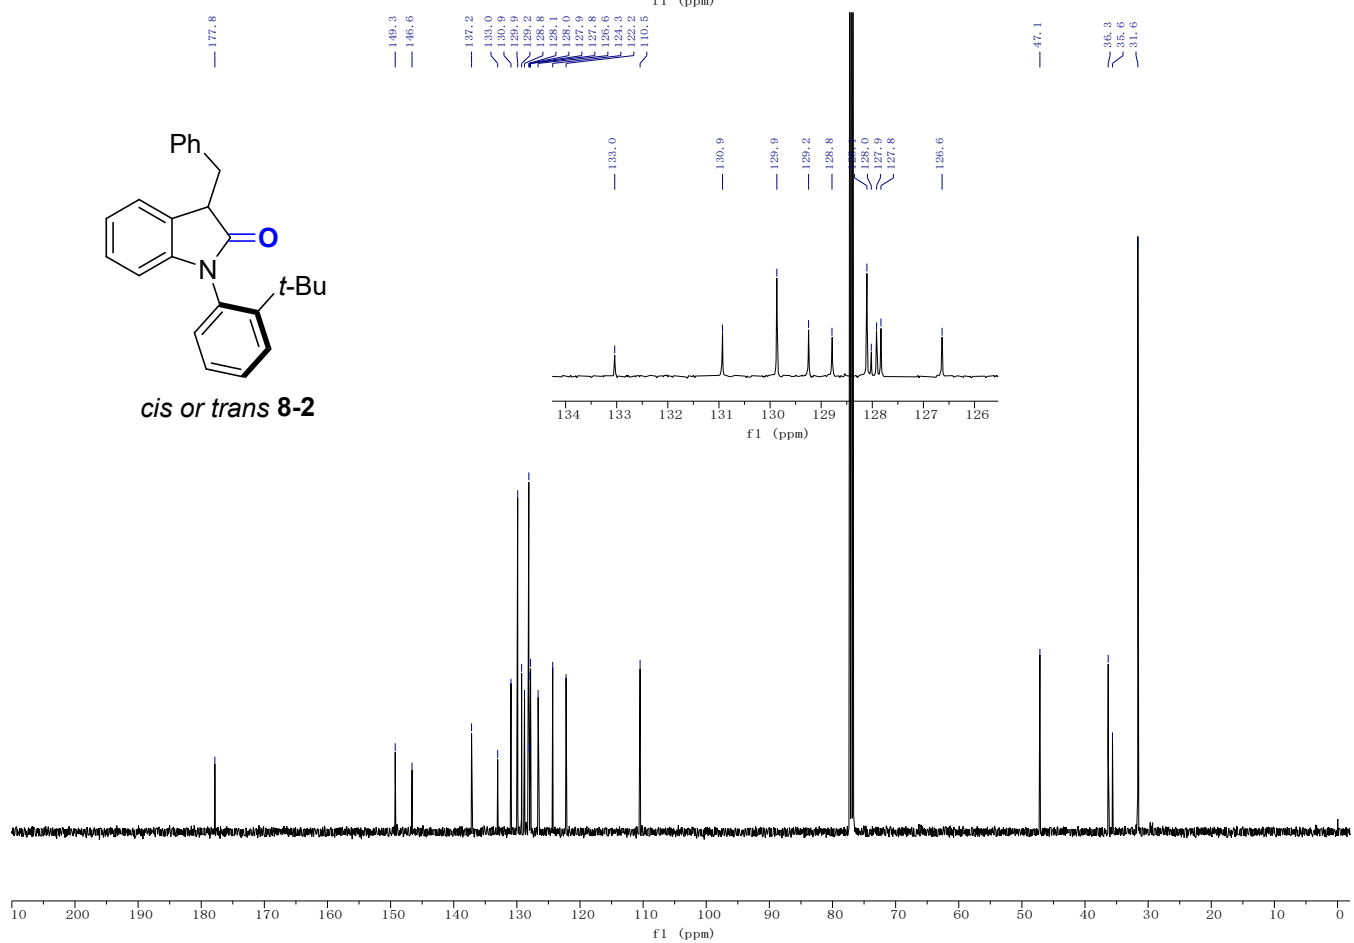

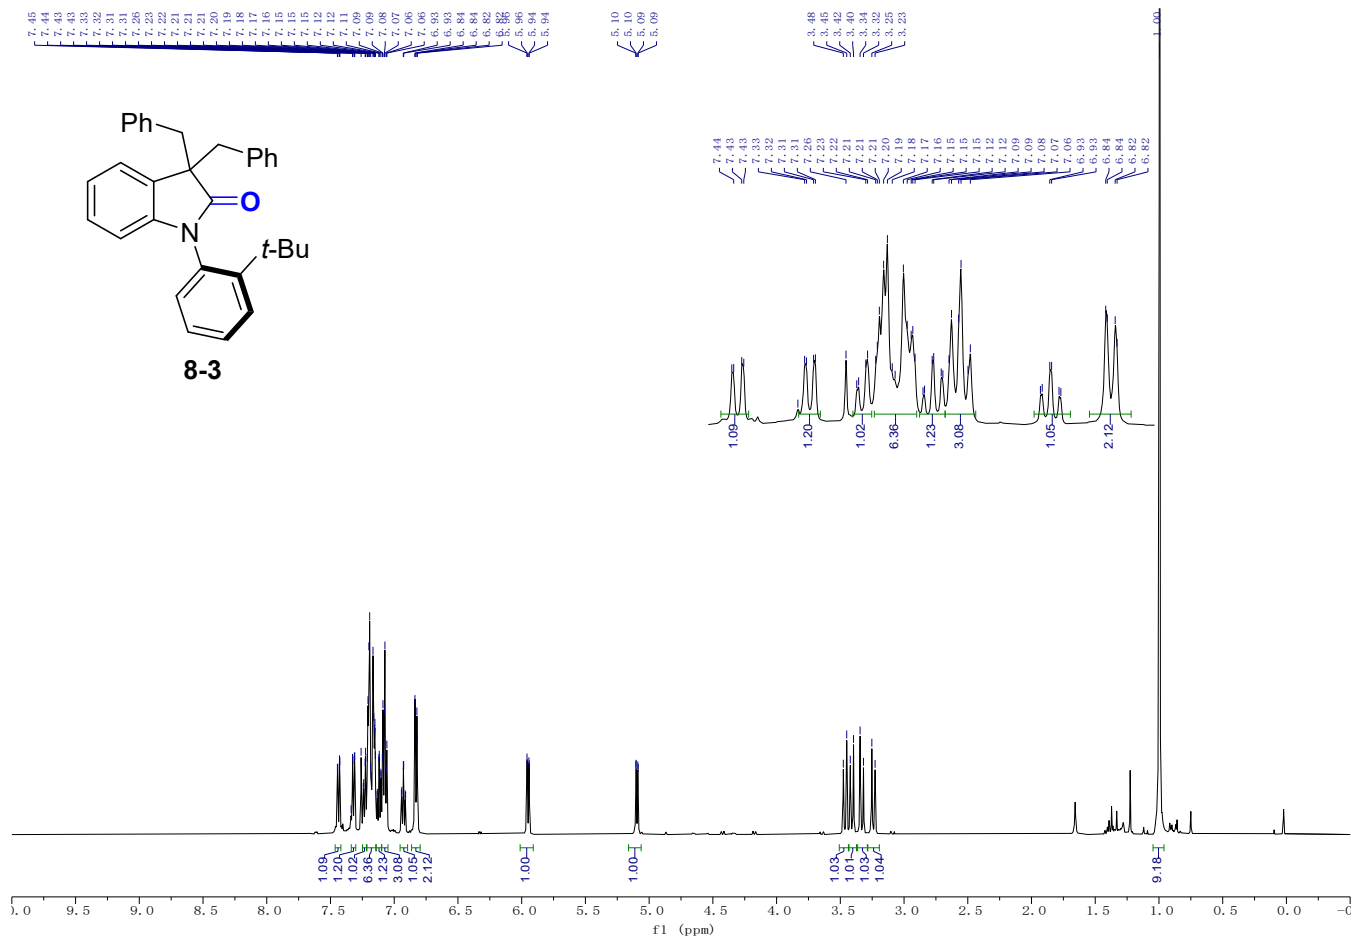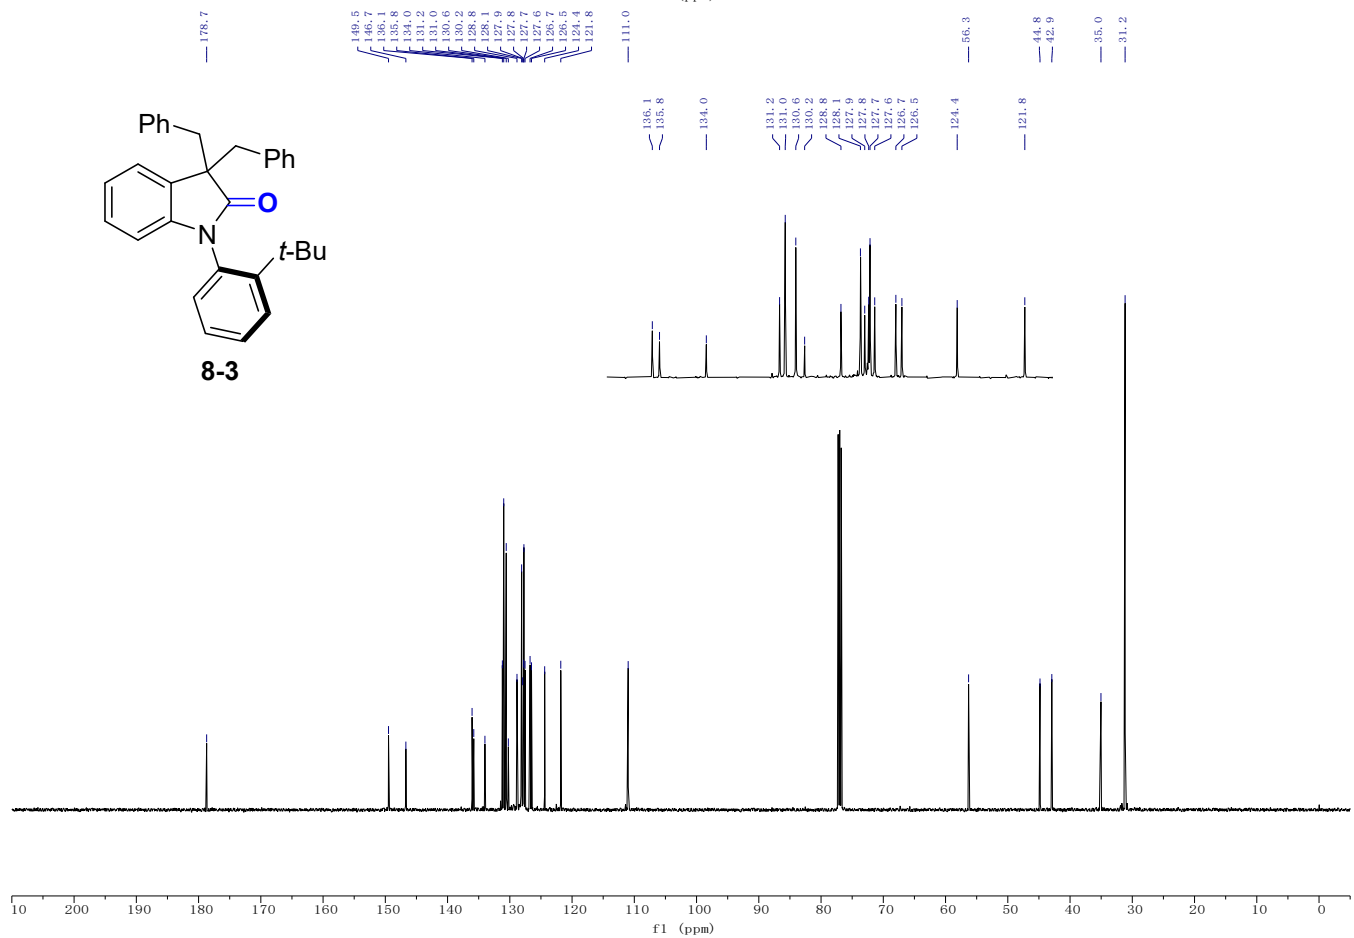

Supplement: d2gc04689j1.pdf [file d2gc04689j1.pdf]
